# Supplementary material for: Mutant KRAS-Associated Proteome Is Mainly Controlled by Exogenous Factors
Source: MDPI journal article supplement (doi:10.3390/cells11131988), 2022-06-21
Supplement: s1 [file s1]

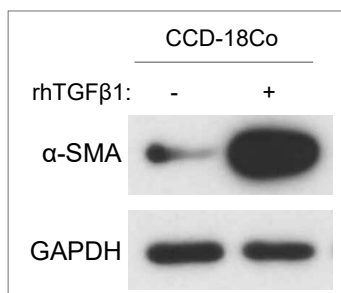

**Figure S1:** Representative western blot showing increased expression of  $\alpha$ -SMA following CCD-18Co fibroblasts activation with rhTGF $\beta$ 1.

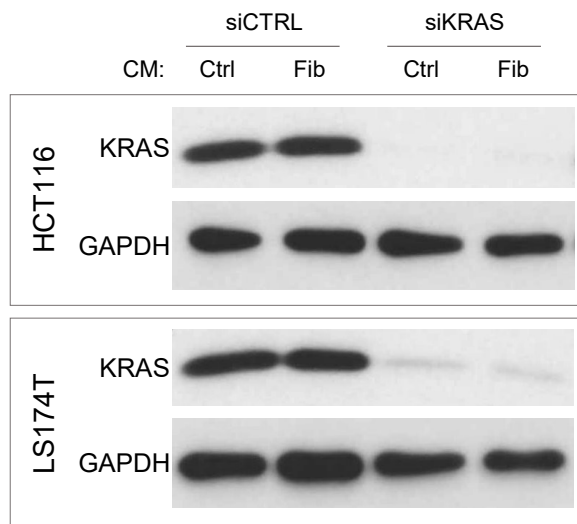

**Figure S2:** Representative western blots showing efficient KRAS silencing in HCT116 and LS174T cell lines.
