# Supplementary material for: Mutant KRAS-Associated Proteome Is Mainly Controlled by Exogenous Factors
Source: Cells. 2022 Jun 21;11(13):1988. doi: 10.3390/cells11131988 (PMC9265670; doi:10.3390/cells11131988)
Supplement: Supplementary file 1 [file cells-11-01988-s001.zip]

Archive with 11 entries (11 files):
- Supplementary figures.pdf
- Supplementary file S1_HCT116_all_identified_proteins.xlsx
- Supplementary file S10_Lists of differentially expressed proteins in LS174T cell line_all comparisons.xlsx
- Supplementary file S2_LS174T_all_identified_proteins.xlsx
- Supplementary file S3_HCT116_siCTRL_FibCM_vs_siCTRL_ctrlCM.xlsx
- Supplementary file S4_LS174T_siCTRL_FibCM_vs_siCTRL_ctrlCM.xlsx
- Supplementary file S5_HCT116_siKRAS_FibCM_vs_siCTRL_FibCM.xlsx
- Supplementary file S6_HCT116_siKRAS_ctrlCM_vs_sCTRL_ctrlCM.xlsx
- Supplementary file S7_LS174T_siKRAS_FibCM_vs_siCTRL_FibCM.xlsx
- Supplementary file S8_LS174T_siKRAS_ctrlCM_vs_sCTRL_ctrlCM.xlsx
- Supplementary file S9_Lists of differentially expressed proteins in HCT116 cell line_all comparisons.xlsx
