# Supplementary material for: Mutant KRAS-Associated Proteome Is Mainly Controlled by Exogenous Factors
Source: Cells. 2022 Jun 21;11(13):1988. doi: 10.3390/cells11131988 (PMC9265670; doi:10.3390/cells11131988)
Supplement: Supplementary file 1 [file cells-11-01988-s001.zip › Supplementary file S1_HCT116_all_identified_proteins.xlsx]

## Sheet: Proteins
Checked	Protein FDR Confidence: Combined	Master	Accession	Description	Exp. q-value: Combined	Contaminant	Sum PEP Score	Coverage [%]	# Peptides	# PSMs	# Unique Peptides	# Protein Groups	# AAs	MW [kDa]	calc. pI	Score Sequest HT: Sequest HT	# Peptides (by Search Engine): Sequest HT	Biological Process	Cellular Component	Molecular Function	Pfam IDs	Entrez Gene ID	Ensembl Gene ID	Gene Symbol	Chromosome	KEGG Pathways	WikiPathways	# Razor Peptides	Abundance Ratio: (2_HCT116_siCTRL_FibCM) / (1_HCT116_siCTRL_ctrlCM)	Abundance Ratio: (3_HCT116_siKRAS_ctrlCM) / (1_HCT116_siCTRL_ctrlCM)	Abundance Ratio: (4_HCT116_siKRAS_FibCM) / (2_HCT116_siCTRL_FibCM)	Abundance Ratio: (4_HCT116_siKRAS_FibCM) / (3_HCT116_siKRAS_ctrlCM)	Abundance Ratio: (4_HCT116_siKRAS_FibCM) / (1_HCT116_siCTRL_ctrlCM)	Abundance Ratio (log2): (2_HCT116_siCTRL_FibCM) / (1_HCT116_siCTRL_ctrlCM)	Abundance Ratio (log2): (3_HCT116_siKRAS_ctrlCM) / (1_HCT116_siCTRL_ctrlCM)	Abundance Ratio (log2): (4_HCT116_siKRAS_FibCM) / (2_HCT116_siCTRL_FibCM)	Abundance Ratio (log2): (4_HCT116_siKRAS_FibCM) / (3_HCT116_siKRAS_ctrlCM)	Abundance Ratio (log2): (4_HCT116_siKRAS_FibCM) / (1_HCT116_siCTRL_ctrlCM)	Abundance Ratio Adj. P-Value: (2_HCT116_siCTRL_FibCM) / (1_HCT116_siCTRL_ctrlCM)	Abundance Ratio Adj. P-Value: (3_HCT116_siKRAS_ctrlCM) / (1_HCT116_siCTRL_ctrlCM)	Abundance Ratio Adj. P-Value: (4_HCT116_siKRAS_FibCM) / (2_HCT116_siCTRL_FibCM)	Abundance Ratio Adj. P-Value: (4_HCT116_siKRAS_FibCM) / (3_HCT116_siKRAS_ctrlCM)	Abundance Ratio Adj. P-Value: (4_HCT116_siKRAS_FibCM) / (1_HCT116_siCTRL_ctrlCM)	Abundance Ratio Variability %: (2_HCT116_siCTRL_FibCM) / (1_HCT116_siCTRL_ctrlCM)	Abundance Ratio Variability %: (3_HCT116_siKRAS_ctrlCM) / (1_HCT116_siCTRL_ctrlCM)	Abundance Ratio Variability %: (4_HCT116_siKRAS_FibCM) / (2_HCT116_siCTRL_FibCM)	Abundance Ratio Variability %: (4_HCT116_siKRAS_FibCM) / (3_HCT116_siKRAS_ctrlCM)	Abundance Ratio Variability %: (4_HCT116_siKRAS_FibCM) / (1_HCT116_siCTRL_ctrlCM)	Abundances (Grouped): 1_HCT116_siCTRL_ctrlCM
FALSE	Low	Master Protein	P17707	S-adenosylmethionine decarboxylase proenzyme OS=Homo sapiens OX=9606 GN=AMD1 PE=1 SV=2	0.058	FALSE	1.796	8	1	1	1	1	334	38.3	6	0	1	metabolic process	cytosol	catalytic activity	Pf01536	262	ENSG00000123505.15	AMD1	6	Metabolic pathways; Cysteine and methionine metabolism; Arginine and proline metabolism		0	2.661	0.01	0.348	100	0.926	1.41	-6.64	-1.52	6.64	-0.11	0.0100695	3.81902e-16	0.0177481	3.05343e-16	0.984817	41.33		0		35.45	87.2
FALSE	High	Master Protein	Q96SK2	Transmembrane protein 209 OS=Homo sapiens OX=9606 GN=TMEM209 PE=1 SV=2	0.001	FALSE	5.411	4	1	4	1	1	561	62.9	8.63	6.24	1		membrane		Pf09786	84928	ENSG00000146842.16	TMEM209	7			0	0.366	0.01	1.67	100	0.611	-1.45	-6.64	0.74	6.64	-0.71	0.0177675	3.81902e-16	0.703115	3.05343e-16	0.711854	6.82		59.63		8.73	202.3
FALSE	High	Master Protein	Q96JN8	Neuralized-like protein 4 OS=Homo sapiens OX=9606 GN=NEURL4 PE=1 SV=2	0.003	FALSE	4.18	1	1	1	1	1	1562	166.8	5.86	0	1		cytoplasm;cytoskeleton	protein binding	Pf07177	84461	ENSG00000215041.9	NEURL4	17			0	0.626	0.01	1.106	100	0.693	-0.67	-6.64	0.15	6.64	-0.53	0.368569	3.81902e-16	0.996247	3.05343e-16	0.798657	0		0		0	172.5
FALSE	High	Master Protein	Q8NEY1	Neuron navigator 1 OS=Homo sapiens OX=9606 GN=NAV1 PE=1 SV=2	0.002	FALSE	4.693	1	1	1	1	1	1877	202.3	8.07	1.73	1	cell differentiation;cell organization and biogenesis;cellular component movement;development	cytoplasm;cytoskeleton	catalytic activity;nucleotide binding;protein binding;RNA binding	Pf00910, Pf02562, Pf12325, Pf13191, Pf13207, Pf13521	89796	ENSG00000134369.15	NAV1	1			0	0.91	0.01	1.165	100	1.06	-0.14	-6.64	0.22	6.64	0.08	0.969619	3.81902e-16	0.988797	3.05343e-16	0.995752	26.47		37.57		24.06	134.7
FALSE	High	Master Protein	O75298	Reticulon-2 OS=Homo sapiens OX=9606 GN=RTN2 PE=1 SV=1	0.002	FALSE	4.973	5	2	2	2	1	545	59.2	5.31	4.54	2	regulation of biological process;transport	endoplasmic reticulum;membrane	protein binding	Pf02453	6253	ENSG00000125744.11	RTN2	19			0	1.724	0.01	2.767	100	4.77	0.79	-6.64	1.47	6.64	2.25	0.300792	3.81902e-16	0.018734	3.05343e-16	0.000633126	42.64		48.97		20.58	53.4
FALSE	Low	Master Protein	P0C1H6	Histone H2B type F-M OS=Homo sapiens OX=9606 GN=H2BFM PE=1 SV=2	0.164	FALSE	1.037	8	1	1	1	1	154	17	10.07	0	1	cell organization and biogenesis	chromosome;nucleus	DNA binding;protein binding	Pf00125	286436	ENSG00000101812.12	H2BFM	X	Viral carcinogenesis; Systemic lupus erythematosus; Alcoholism		0			100	100	100			6.64	6.64	6.64			3.26911e-16	3.05343e-16	3.35161e-16
FALSE	Medium	Master Protein	Q7Z3E5	LisH domain-containing protein ARMC9 OS=Homo sapiens OX=9606 GN=ARMC9 PE=1 SV=3	0.013	FALSE	2.956	1	1	1	1	1	818	91.8	6.2	1.94	1											0	100		1.054	100	100	6.64		0.08	6.64	6.64	4.12715e-16		0.999922	3.05343e-16	3.35161e-16			80.85
FALSE	Low	Master Protein	Q9HBG6	Intraflagellar transport protein 122 homolog OS=Homo sapiens OX=9606 GN=IFT122 PE=1 SV=2	0.175	FALSE	1.003	1	1	1	1	1	1241	141.7	6.49	0	1	cell organization and biogenesis;cellular component movement;development;regulation of biological process;response to stimulus;transport	cytoplasm;cytoskeleton;cytosol;membrane	protein binding	Pf00400	55764	ENSG00000163913.11	IFT122	3			0			100	100	100			6.64	6.64	6.64			3.26911e-16	3.05343e-16	3.35161e-16
FALSE	High	Master Protein	Q9NXV6	CDKN2A-interacting protein OS=Homo sapiens OX=9606 GN=CDKN2AIP PE=1 SV=3	0.003	FALSE	4.186	2	1	2	1	1	580	61.1	9.01	3.87	1	regulation of biological process;response to stimulus	nucleus	protein binding;RNA binding	Pf11952	55602	ENSG00000168564.5	CDKN2AIP	4			0	0.01	0.01	100	100	17.039	-6.64	-6.64	6.64	6.64	4.09	4.12715e-16	3.81902e-16	3.26911e-16	3.05343e-16	6.20202e-11					0	22.2
FALSE	High	Master Protein	Q15582	Transforming growth factor-beta-induced protein ig-h3 OS=Homo sapiens OX=9606 GN=TGFBI PE=1 SV=1	0	FALSE	25.026	12	6	8	6	1	683	74.6	7.71	20.95	6	cell differentiation;cell organization and biogenesis;cell proliferation;metabolic process;regulation of biological process;response to stimulus	extracellular;membrane	protein binding	Pf02469, Pf07546	7045	ENSG00000120708.16	TGFBI	5			0	100		3.124	100	100	6.64		1.64	6.64	6.64	4.12715e-16		1.55225e-07	3.05343e-16	3.35161e-16			64.14
FALSE	High	Master Protein	Q9BWJ5	Splicing factor 3B subunit 5 OS=Homo sapiens OX=9606 GN=SF3B5 PE=1 SV=1	0.009	FALSE	3.311	15	1	1	1	1	86	10.1	6.35	2.48	1	metabolic process	nucleus;spliceosomal complex	RNA binding	Pf07189	83443	ENSG00000169976.6	SF3B5	6	Spliceosome	mRNA Processing	0	0.927	0.01	1.16	100	1.075	-0.11	-6.64	0.21	6.64	0.1	0.986042	3.81902e-16	0.988797	3.05343e-16	0.988315	5.89		0		6.86	133.2
FALSE	High	Master Protein	Q8IY45	Protein AMN1 homolog OS=Homo sapiens OX=9606 GN=AMN1 PE=2 SV=4	0	FALSE	12.83	17	2	4	2	1	258	28.4	7.85	13.43	2			protein binding		196394	ENSG00000151743.10	AMN1	12			0	1.492	0.01	0.506	100	0.829	0.58	-6.64	-0.98	6.64	-0.27	0.482878	3.81902e-16	0.313899	3.05343e-16	0.929578	55.71		12.96		34.9	123.2
FALSE	Low	Master Protein	Q8NC42	E3 ubiquitin-protein ligase RNF149 OS=Homo sapiens OX=9606 GN=RNF149 PE=2 SV=2	0.072	FALSE	1.658	4	1	1	1	1	400	43.1	6.54	0	1	metabolic process;regulation of biological process;response to stimulus	membrane	catalytic activity;metal ion binding;protein binding	Pf00097, Pf02225, Pf12678, Pf13639, Pf13920, Pf13923, Pf14634	284996	ENSG00000163162.8	RNF149	2			0	0.616	0.01	0.788	100	0.485	-0.7	-6.64	-0.34	6.64	-1.04	0.580118	3.81902e-16	0.904697	3.05343e-16	0.398847	0.15		0		0.09	190.4
FALSE	High	Master Protein	Q15542	Transcription initiation factor TFIID subunit 5 OS=Homo sapiens OX=9606 GN=TAF5 PE=1 SV=3	0	FALSE	11.965	6	2	2	2	1	800	86.8	5.64	7.97	2	cell organization and biogenesis;metabolic process;regulation of biological process	cytoskeleton;nucleus	catalytic activity;DNA binding;protein binding	Pf00400, Pf04494, Pf08662	6877	ENSG00000148835.10	TAF5	10	Basal transcription factors; Herpes simplex infection	Eukaryotic Transcription Initiation	0	2.508	0.01	0.398	100	0.998	1.33	-6.64	-1.33	6.64	0	0.00196719	3.81902e-16	0.0275327	3.05343e-16	0.985678	25.74		3.47		0	88.8
FALSE	High	Master Protein	Q8NFQ8	Torsin-1A-interacting protein 2 OS=Homo sapiens OX=9606 GN=TOR1AIP2 PE=1 SV=1	0.001	FALSE	5.877	7	2	2	2	1	470	51.2	4.96	5.21	2	cell organization and biogenesis;regulation of biological process	endoplasmic reticulum;membrane;nucleus	enzyme regulator activity;protein binding	Pf05609	163590	ENSG00000169905.12	TOR1AIP2	1			0	0.957	0.01	0.386	100	0.553	-0.06	-6.64	-1.37	6.64	-0.85	0.987145	3.81902e-16	0.0189159	3.05343e-16	0.456172	45.27		9.85		24.98	158.9
FALSE	High	Master Protein	Q13541	Eukaryotic translation initiation factor 4E-binding protein 1 OS=Homo sapiens OX=9606 GN=EIF4EBP1 PE=1 SV=3	0.002	FALSE	5.152	22	1	1	1	1	118	12.6	5.48	2.36	1	metabolic process;regulation of biological process;response to stimulus	cytoplasm;cytosol;nucleus	protein binding;translation regulator activity	Pf05456	1978	ENSG00000187840.4	EIF4EBP1	8	Insulin signaling pathway; HIF-1 signaling pathway; Acute myeloid leukemia; ErbB signaling pathway; EGFR tyrosine kinase inhibitor resistance; Choline metabolism in cancer; AMPK signaling pathway; mTOR signaling pathway; RNA transport; Longevity regulating pathway; PI3K-Akt signaling pathway	Follicle Stimulating Hormone (FSH) signaling pathway; AMP-activated Protein Kinase (AMPK) Signaling; Interferon type I signaling pathways; Insulin Signaling; Focal Adhesion-PI3K-Akt-mTOR-signaling pathway; Alpha 6 Beta 4 signaling pathway; PI3K-AKT-mTOR signaling pathway and therapeutic opportunities; Rac1/Pak1/p38/MMP-2 pathway; Angiopoietin Like Protein 8 Regulatory Pathway; Prolactin Signaling…	0	0.346	0.01	3.284	100	1.136	-1.53	-6.64	1.72	6.64	0.18	3.42692e-06	3.81902e-16	0.00883896	3.05343e-16	0.974233	3.99		26.08		46.49	161.2
FALSE	High	Master Protein	P42694	Probable helicase with zinc finger domain OS=Homo sapiens OX=9606 GN=HELZ PE=1 SV=2	0.001	FALSE	5.801	2	1	3	1	1	1942	218.8	7.42	2.5	1		membrane;nucleus	catalytic activity;DNA binding;metal ion binding;nucleotide binding;protein binding;RNA binding	Pf00580, Pf00642, Pf02562, Pf04851, Pf07728, Pf13086, Pf13087, Pf13245, Pf13604	9931	ENSG00000198265.11	HELZ	17			0	2.243	0.01	0.459	100	1.029	1.17	-6.64	-1.12	6.64	0.04	0.0231551	3.81902e-16	0.148015	3.05343e-16	0.995752	53.25		11.2		0	93.6
FALSE	High	Master Protein	P35030	Trypsin-3 OS=Homo sapiens OX=9606 GN=PRSS3 PE=1 SV=2	0.001	FALSE	5.214	4	1	1	1	1	304	32.5	7.49	1.98	1	cellular component movement;metabolic process;response to stimulus;transport	extracellular	catalytic activity;metal ion binding;protein binding	Pf00089	5646	ENSG00000010438.16	PRSS3	9	Neuroactive ligand-receptor interaction; Protein digestion and absorption; Pancreatic secretion; Influenza A		0	100		1.8	100	100	6.64		0.85	6.64	6.64	4.12715e-16		0.624277	3.05343e-16	3.35161e-16			0
FALSE	Low	Master Protein	Q8NAN2	Mitoguardin 1 OS=Homo sapiens OX=9606 GN=MIGA1 PE=1 SV=1	0.155	FALSE	1.079	1	1	1	1	1	632	71	5.63	0	1	cell organization and biogenesis	membrane;mitochondrion	protein binding	Pf10265	374986	ENSG00000180488.14	FAM73A; MIGA1	1			0	1.895	0.01	0.317	100	0.859	0.92	-6.64	-1.66	6.64	-0.22	0.266313	3.81902e-16	0.0113295	3.05343e-16	0.965214	42.09		7.09		42.18	116.5
FALSE	High	Master Protein	P48382	DNA-binding protein RFX5 OS=Homo sapiens OX=9606 GN=RFX5 PE=1 SV=1	0.005	FALSE	3.867	2	1	1	1	1	616	65.3	9.29	2.37	1	metabolic process;regulation of biological process	nucleus	DNA binding;protein binding	Pf02257, Pf03288, Pf14621	5993	ENSG00000143390.17	RFX5	1	Primary immunodeficiency; Tuberculosis; Antigen processing and presentation		0	0.503	0.01	3.016	100	1.516	-0.99	-6.64	1.59	6.64	0.6	0.200731	3.81902e-16	0.0534715	3.05343e-16	0.846261	18.84		68.54		18.48	132.5
FALSE	Low	Master Protein	Q8IZU2	WD repeat-containing protein 17 OS=Homo sapiens OX=9606 GN=WDR17 PE=2 SV=2	0.091	FALSE	1.448	2	1	1	1	1	1322	147.6	6.46	0	1		cytoplasm	protein binding	Pf00400	116966	ENSG00000150627.15	WDR17	4			0	100		1.693	100	100	6.64		0.76	6.64	6.64	4.12715e-16		0.680719	3.05343e-16	3.35161e-16			0
FALSE	Low	Master Protein	Q96D05	Uncharacterized protein FAM241B OS=Homo sapiens OX=9606 GN=FAM241B PE=1 SV=1	0.105	FALSE	1.324	12	1	1	1	1	121	13.2	11.58	0	1		membrane	protein binding	Pf15378	219738	ENSG00000171224.8	C10orf35; FAM241B	10			0	0.932	0.01	0.58	100	0.541	-0.1	-6.64	-0.79	6.64	-0.89	0.981907	3.81902e-16	0.547927	3.05343e-16	0.531928	41.2		23.48		2.96	161.8
FALSE	Low	Master Protein	Q04771	Activin receptor type-1 OS=Homo sapiens OX=9606 GN=ACVR1 PE=1 SV=1	0.077	FALSE	1.588	2	1	1	1	1	509	57.1	7.33	0	1	cell differentiation;cellular component movement;defense response;metabolic process;regulation of biological process;response to stimulus	membrane	catalytic activity;metal ion binding;nucleotide binding;protein binding;receptor activity;signal transducer activity	Pf00069, Pf01064, Pf07714, Pf08515	90	ENSG00000115170.13	ACVR1	2	TGF-beta signaling pathway; Cytokine-cytokine receptor interaction; Signaling pathways regulating pluripotency of stem cells	Mesodermal Commitment Pathway; ESC Pluripotency Pathways	0			100	100	100			6.64	6.64	6.64			3.26911e-16	3.05343e-16	3.35161e-16
FALSE	Low	Master Protein	Q9BYG5	Partitioning defective 6 homolog beta OS=Homo sapiens OX=9606 GN=PARD6B PE=1 SV=1	0.13	FALSE	1.171	3	1	1	1	1	372	41.2	5.58	0	1	cell division;cell organization and biogenesis;regulation of biological process	cytoplasm;cytosol;membrane;nucleus	protein binding	Pf00564, Pf00595	84612	ENSG00000124171.8	PARD6B	20	Endocytosis; Tight junction; Hippo signaling pathway; Rap1 signaling pathway; Axon guidance		0	1.009	0.01	1.174	100	1.184	0.01	-6.64	0.23	6.64	0.24	0.987704	3.81902e-16	0.988797	3.05343e-16	0.966327	25.31		0		25.31	125.3
FALSE	High	Master Protein	Q8IX90	Spindle and kinetochore-associated protein 3 OS=Homo sapiens OX=9606 GN=SKA3 PE=1 SV=2	0.002	FALSE	4.956	6	2	3	2	1	412	46.3	5.11	3.38	2	cell division;regulation of biological process	chromosome;cytoplasm;cytoskeleton	protein binding		221150	ENSG00000165480.15	SKA3	13			0	0.01	0.01	100	100	0.886	-6.64	-6.64	6.64	6.64	-0.17	4.12715e-16	3.81902e-16	3.26911e-16	3.05343e-16	0.969017					20.58	212.1
FALSE	High	Master Protein	Q96Q15	Serine/threonine-protein kinase SMG1 OS=Homo sapiens OX=9606 GN=SMG1 PE=1 SV=3	0	FALSE	6.862	0	2	12	1	1	3661	410.2	6.46	17.8	2	metabolic process;regulation of biological process;response to stimulus;transport	cytoplasm;cytosol;nucleus	catalytic activity;DNA binding;metal ion binding;nucleotide binding;protein binding;RNA binding	Pf00454, Pf02260	23049	ENSG00000157106.16	SMG1	16	mRNA surveillance pathway		0	0.767	0.01	1.125	100	0.948	-0.38	-6.64	0.17	6.64	-0.08	0.814119	3.81902e-16	0.994465	3.05343e-16	0.974738	21.7		44.81		37.17	145.5
FALSE	High	Master Protein	Q9NWZ5	Uridine-cytidine kinase-like 1 OS=Homo sapiens OX=9606 GN=UCKL1 PE=1 SV=2	0.002	FALSE	4.972	3	1	3	1	1	548	61.1	7.36	7.69	1	metabolic process	cytoplasm;cytosol;nucleus	catalytic activity;nucleotide binding;protein binding	Pf00485, Pf07931, Pf13207, Pf14681	54963	ENSG00000198276.15	UCKL1	20	Metabolic pathways; Pyrimidine metabolism; Drug metabolism - other enzymes		0	1.201	0.01	0.729	100	0.775	0.26	-6.64	-0.46	6.64	-0.37	0.868581	3.81902e-16	0.824216	3.05343e-16	0.882144	37.18		17.9		17.4	151.5
FALSE	High	Master Protein	P53350	Serine/threonine-protein kinase PLK1 OS=Homo sapiens OX=9606 GN=PLK1 PE=1 SV=1	0	FALSE	7.522	10	3	4	3	1	603	68.2	8.91	0	3	cell division;cell organization and biogenesis;cell proliferation;metabolic process;regulation of biological process;response to stimulus	chromosome;cytoplasm;cytoskeleton;cytosol;nucleus	catalytic activity;metal ion binding;nucleotide binding;protein binding	Pf00069, Pf00659, Pf07714, Pf14531	5347	ENSG00000166851.14	PLK1	16	FoxO signaling pathway; Progesterone-mediated oocyte maturation; Oocyte meiosis; Cell cycle	Regulation of toll-like receptor signaling pathway; Cell Cycle; Integrated Cancer pathway; TNF alpha Signaling Pathway	0	0.01	0.01	100	100	0.512	-6.64	-6.64	6.64	6.64	-0.97	4.12715e-16	3.81902e-16	3.26911e-16	3.05343e-16	0.414053					1.13	267.2
FALSE	High	Master Protein	Q9Y3T6	R3H and coiled-coil domain-containing protein 1 OS=Homo sapiens OX=9606 GN=R3HCC1 PE=1 SV=3	0.002	FALSE	4.87	3	1	1	1	1	440	49.1	5.63	2.52	1				Pf01424	203069		R3HCC1	8			0	0.88	0.01	0.967	100	0.847	-0.18	-6.64	-0.05	6.64	-0.24	0.920366	3.81902e-16	0.988797	3.05343e-16	0.926774	33.74		40.49		17.49	162
FALSE	High	Master Protein	Q9NPE2	Neugrin OS=Homo sapiens OX=9606 GN=NGRN PE=1 SV=2	0	FALSE	6.594	4	1	2	1	1	291	32.4	9.1	2.88	1	cell differentiation;development	extracellular;nucleus	RNA binding	Pf06413	51335	ENSG00000182768.8	NGRN	15			0	100		0.398	100	100	6.64		-1.33	6.64	6.64	4.12715e-16		0.0789356	3.05343e-16	3.35161e-16			11.47
FALSE	Medium	Master Protein	O60566	Mitotic checkpoint serine/threonine-protein kinase BUB1 beta OS=Homo sapiens OX=9606 GN=BUB1B PE=1 SV=3	0.027	FALSE	2.355	1	1	1	1	1	1050	119.5	5.27	2.08	1	cell death;cell division;cell organization and biogenesis;cell proliferation;metabolic process;regulation of biological process	chromosome;cytoplasm;cytoskeleton;cytosol;nucleus	catalytic activity;nucleotide binding;protein binding	Pf08311	701	ENSG00000156970.12	BUB1B	15	HTLV-I infection; Cell cycle	Cell Cycle	0	0.988	0.01	0.786	100	0.875	-0.02	-6.64	-0.35	6.64	-0.19	0.992692	3.81902e-16	0.913463	3.05343e-16	0.959608	51.59		31.96		50.86	111.1
FALSE	High	Master Protein	Q96DD7	Protein shisa-4 OS=Homo sapiens OX=9606 GN=SHISA4 PE=2 SV=3	0.008	FALSE	3.398	5	1	1	1	1	197	21.5	7.88	2.02	1		membrane		Pf13908	149345	ENSG00000198892.6	SHISA4	1			0	0.01	0.01	100	100	1.627	-6.64	-6.64	6.64	6.64	0.7	4.12715e-16	3.81902e-16	3.26911e-16	3.05343e-16	0.767539					62.32	142.8
FALSE	High	Master Protein	P13747	HLA class I histocompatibility antigen, alpha chain E OS=Homo sapiens OX=9606 GN=HLA-E PE=1 SV=4	0	FALSE	19.119	12	3	18	1	1	358	40	5.83	61.57	3											0	0.943	0.01	1.188	100	1.167	-0.09	-6.64	0.25	6.64	0.22	0.99136	3.81902e-16	0.988797	3.05343e-16	0.969017	12.69		83.69		77.64	132.3
FALSE	Low	Master Protein	Q9ULM3	YEATS domain-containing protein 2 OS=Homo sapiens OX=9606 GN=YEATS2 PE=1 SV=2	0.116	FALSE	1.254	3	1	1	1	1	1422	150.7	8.98	0	1	cell organization and biogenesis;metabolic process;regulation of biological process	nucleus	protein binding	Pf03366	55689	ENSG00000163872.15	YEATS2	3			0	0.01	0.01	100	100	1.695	-6.64	-6.64	6.64	6.64	0.76	4.12715e-16	3.81902e-16	3.26911e-16	3.05343e-16	0.780219					0	148.4
FALSE	High	Master Protein	Q0VGL1	Ragulator complex protein LAMTOR4 OS=Homo sapiens OX=9606 GN=LAMTOR4 PE=1 SV=1	0.002	FALSE	4.645	43	1	1	1	1	99	10.7	6.54	0	1	cell organization and biogenesis;regulation of biological process;response to stimulus	membrane;vacuole	protein binding;structural molecule activity		389541	ENSG00000188186.10	LAMTOR4	7	mTOR signaling pathway		0			100	100	100			6.64	6.64	6.64			3.26911e-16	3.05343e-16	3.35161e-16
FALSE	High	Master Protein	Q2M389	WASH complex subunit 4 OS=Homo sapiens OX=9606 GN=WASHC4 PE=1 SV=2	0	FALSE	7.456	2	2	2	2	1	1173	136.3	7.44	5.48	2	cell organization and biogenesis;transport	endosome		Pf14744, Pf14745, Pf14746	23325	ENSG00000136051.13	KIAA1033; WASHC4	12	Endocytosis		0	1.07	0.01	0.988	100	0.904	0.1	-6.64	-0.02	6.64	-0.15	0.964913	3.81902e-16	0.992195	3.05343e-16	0.954564	69.59		79.48		36.92	111.8
FALSE	High	Master Protein	Q9UPQ9	Trinucleotide repeat-containing gene 6B protein OS=Homo sapiens OX=9606 GN=TNRC6B PE=1 SV=4	0	FALSE	6.984	4	3	3	3	1	1833	193.9	6.76	2.09	3	regulation of biological process;response to stimulus	cytoplasm;cytosol	protein binding;RNA binding	Pf10427, Pf13893	23112	ENSG00000100354.20	TNRC6B	22			0	0.535	0.01	2.393	100	1.042	-0.9	-6.64	1.26	6.64	0.06	0.131079	3.81902e-16	0.176	3.05343e-16	0.995752	7.93		0		0	150
FALSE	High	Master Protein	O95994	Anterior gradient protein 2 homolog OS=Homo sapiens OX=9606 GN=AGR2 PE=1 SV=1	0	FALSE	6.619	10	1	1	1	1	175	20	9	3.84	1	cell differentiation;regulation of biological process;response to stimulus;transport	endoplasmic reticulum;extracellular;mitochondrion	protein binding	Pf13899	10551	ENSG00000106541.11	AGR2	7			0	0.01	0.01	100	100	0.073	-6.64	-6.64	6.64	6.64	-3.78	4.12715e-16	3.81902e-16	3.26911e-16	3.05343e-16	3.51706e-12					0	372.9
FALSE	High	Master Protein	Q8NEM2	SHC SH2 domain-binding protein 1 OS=Homo sapiens OX=9606 GN=SHCBP1 PE=1 SV=3	0	FALSE	6.648	7	2	2	2	1	672	75.6	4.75	2.58	2	regulation of biological process;response to stimulus	cytoplasm;cytoskeleton	protein binding	Pf05048, Pf12708, Pf13229	79801	ENSG00000171241.8	SHCBP1	16			0	100		1.009	100	100	6.64		0.01	6.64	6.64	4.12715e-16		0.999922	3.05343e-16	3.35161e-16			0
FALSE	Medium	Master Protein	Q86VP3	Phosphofurin acidic cluster sorting protein 2 OS=Homo sapiens OX=9606 GN=PACS2 PE=1 SV=3	0.017	FALSE	2.74	4	2	7	2	1	889	97.6	6.6	0	2	cell death;cell organization and biogenesis	endoplasmic reticulum;mitochondrion	protein binding	Pf10254	23241	ENSG00000179364.13	PACS2	14			0	0.969	0.01	1.647	100	1.175	-0.05	-6.64	0.72	6.64	0.23	0.999944	3.81902e-16	0.740708	3.05343e-16	0.969017	24.76		54.25		55.26	103.7
FALSE	High	Master Protein	Q5T160	Probable arginine--tRNA ligase, mitochondrial OS=Homo sapiens OX=9606 GN=RARS2 PE=1 SV=1	0.001	FALSE	6.077	4	2	2	2	1	578	65.5	8.21	2.99	2	cell organization and biogenesis;metabolic process	cytoplasm;mitochondrion;organelle lumen	catalytic activity;nucleotide binding;RNA binding	Pf00750, Pf05746	57038	ENSG00000146282.17	RARS2	6	Aminoacyl-tRNA biosynthesis		0			100	100	100			6.64	6.64	6.64			3.26911e-16	3.05343e-16	3.35161e-16
FALSE	High	None	A6NFN3	RNA binding protein fox-1 homolog 3 OS=Homo sapiens OX=9606 GN=RBFOX3 PE=2 SV=4	0.002	FALSE	4.927	3	1	2	1	1	312	33.9	7.27	8.32	1	metabolic process;regulation of biological process	cytoplasm;nucleus	DNA binding;RNA binding	Pf00076, Pf08777, Pf12414, Pf13893, Pf14259	146713	ENSG00000167281.18	RBFOX3	17			0	0.411	0.01	4.691	100	2.298	-1.28	-6.64	2.23	6.64	1.2	0.0548211	3.81902e-16	0.000781034	3.05343e-16	0.289926	11.72		87.81		59.37	138.7
FALSE	Medium	None	Q9HAY6	Beta,beta-carotene 15,15'-dioxygenase OS=Homo sapiens OX=9606 GN=BCO1 PE=1 SV=1	0.023	FALSE	2.531	1	1	1	1	1	547	62.6	6.67	2.58	1	metabolic process	cytosol	catalytic activity;metal ion binding	Pf03055	53630	ENSG00000135697.9	BCMO1; BCO1	16	Retinol metabolism; Metabolic pathways	Vitamin A and Carotenoid Metabolism	0			100	100	100			6.64	6.64	6.64			3.26911e-16	3.05343e-16	3.35161e-16
FALSE	High	Master Protein	Q96DF8	Splicing factor ESS-2 homolog OS=Homo sapiens OX=9606 GN=ESS2 PE=1 SV=1	0.005	FALSE	3.867	4	1	1	1	1	476	52.5	7.56	0	1	metabolic process	nucleus;spliceosomal complex	protein binding	Pf09751	8220	ENSG00000100056.11	DGCR14; ESS2	22			0	0.577	0.01	7.397	100	4.265	-0.79	-6.64	2.89	6.64	2.09	0.231311	3.81902e-16	2.53416e-10	3.05343e-16	1.69714e-05	14.9		49.31		14.25	68.5
FALSE	High	Master Protein	Q9Y4E1	WASH complex subunit 2C OS=Homo sapiens OX=9606 GN=WASHC2C PE=1 SV=4	0	FALSE	84.079	20	12	47	1	1	1320	144.8	4.79	163.41	12	regulation of biological process;transport	cytosol;endosome;membrane	protein binding	Pf15255	253725	ENSG00000172661.17	FAM21C; WASHC2C	10	Endocytosis		0	100		1.243	100	100	6.64		0.31	6.64	6.64	4.12715e-16		0.965823	3.05343e-16	3.35161e-16			0
FALSE	Low	Master Protein	Q9NYZ3	G2 and S phase-expressed protein 1 OS=Homo sapiens OX=9606 GN=GTSE1 PE=1 SV=3	0.067	FALSE	1.691	1	1	1	1	1	720	76.6	9.39	0	1	metabolic process;regulation of biological process;response to stimulus	cytoplasm;cytoskeleton;cytosol;membrane	protein binding	Pf15259	51512		GTSE1	22	p53 signaling pathway		0	1.832	0.01	1.257	100	2.303	0.87	-6.64	0.33	6.64	1.2	0.272119	3.81902e-16	0.976114	3.05343e-16	0.293027	86.41		109.14		188.91	77.9
FALSE	High	Master Protein	Q9C0C7	Activating molecule in BECN1-regulated autophagy protein 1 OS=Homo sapiens OX=9606 GN=AMBRA1 PE=1 SV=2	0	FALSE	6.926	2	1	1	1	1	1298	142.4	7.18	3.94	1	cell communication;cell differentiation;cell organization and biogenesis;development;metabolic process;regulation of biological process;response to stimulus	cytoplasm;cytosol;membrane;mitochondrion;vacuole	protein binding	Pf00400	55626	ENSG00000110497.14	AMBRA1	11		Senescence and Autophagy in Cancer; Nanoparticle triggered autophagic cell death	0	0.904	0.01	2.409	100	2.423	-0.15	-6.64	1.27	6.64	1.28	0.942692	3.81902e-16	0.175507	3.05343e-16	0.316358	28.81		83.19		81.44	94.4
FALSE	Low	Master Protein	P52798	Ephrin-A4 OS=Homo sapiens OX=9606 GN=EFNA4 PE=1 SV=1	0.113	FALSE	1.273	16	1	1	1	1	201	22.4	7.28	0	1	cell communication;cell differentiation;cellular component movement;regulation of biological process;response to stimulus	extracellular;membrane	catalytic activity;protein binding;receptor activity;signal transducer activity	Pf00812	1945	ENSG00000243364.7	EFNA4	1	Rap1 signaling pathway; Ras signaling pathway; Axon guidance; PI3K-Akt signaling pathway	Focal Adhesion-PI3K-Akt-mTOR-signaling pathway	0	1.339	0.01	0.274	100	0.428	0.42	-6.64	-1.87	6.64	-1.22	0.708528	3.81902e-16	0.00344262	3.05343e-16	0.218059	69.31		6.53		20.54	157.5
FALSE	Medium	Master Protein	Q32NB8	CDP-diacylglycerol--glycerol-3-phosphate 3-phosphatidyltransferase, mitochondrial OS=Homo sapiens OX=9606 GN=PGS1 PE=2 SV=1	0.034	FALSE	2.185	3	1	1	1	1	556	62.7	8.9	0	1	metabolic process	endoplasmic reticulum;membrane;mitochondrion	catalytic activity;metal ion binding;nucleotide binding		9489	ENSG00000087157.18	PGS1	17	Glycerophospholipid metabolism; Metabolic pathways		0	100		2.363	100	100	6.64		1.24	6.64	6.64	4.12715e-16		0.185005	3.05343e-16	3.35161e-16			69.82
FALSE	High	Master Protein	Q5SY16	Polynucleotide 5'-hydroxyl-kinase NOL9 OS=Homo sapiens OX=9606 GN=NOL9 PE=1 SV=1	0.003	FALSE	4.223	2	1	1	1	1	702	79.3	9.13	2.79	1	metabolic process	cytoskeleton;membrane;nucleus	catalytic activity;enzyme regulator activity;nucleotide binding;protein binding;RNA binding	Pf03205, Pf06807	79707	ENSG00000162408.10	NOL9	1			0			100	100	100			6.64	6.64	6.64			3.26911e-16	3.05343e-16	3.35161e-16
FALSE	Medium	Master Protein	O75330	Hyaluronan mediated motility receptor OS=Homo sapiens OX=9606 GN=HMMR PE=1 SV=2	0.015	FALSE	2.879	3	1	1	1	1	724	84	5.83	0	1	metabolic process;regulation of biological process	cell surface;cytoplasm;cytosol;membrane	protein binding	Pf04111	3161	ENSG00000072571.19	HMMR	5	ECM-receptor interaction		0	0.927	0.01	1.097	100	1.017	-0.11	-6.64	0.13	6.64	0.02	0.981907	3.81902e-16	0.99903	3.05343e-16	0.995752	39.92		15.62		41.87	135.9
FALSE	High	Master Protein	P09486	SPARC OS=Homo sapiens OX=9606 GN=SPARC PE=1 SV=1	0.001	FALSE	5.382	5	1	1	1	1	303	34.6	4.84	3.81	1	cell organization and biogenesis;regulation of biological process;response to stimulus;transport	cell surface;cytoplasm;extracellular;membrane;mitochondrion;nucleus;organelle lumen	metal ion binding;protein binding	Pf00050, Pf07648, Pf09289, Pf10591	6678	ENSG00000113140.10	SPARC	5		Senescence and Autophagy in Cancer; miR-509-3p alteration of YAP1/ECM axis	0	100		3.192	100	100	6.64		1.67	6.64	6.64	4.12715e-16		0.00191991	3.05343e-16	3.35161e-16			0
FALSE	High	Master Protein	Q8IWQ3	Serine/threonine-protein kinase BRSK2 OS=Homo sapiens OX=9606 GN=BRSK2 PE=1 SV=3	0.002	FALSE	4.848	2	1	1	1	1	736	81.6	8.79	2.76	1	cell death;cell differentiation;cell division;cell organization and biogenesis;metabolic process;regulation of biological process;response to stimulus;transport	cytoplasm;cytoskeleton;endoplasmic reticulum;nucleus	catalytic activity;enzyme regulator activity;metal ion binding;nucleotide binding;protein binding	Pf00069, Pf01633, Pf07714	9024	ENSG00000174672.15	BRSK2	11			0	1.04	0.01	1.221	100	1.27	0.06	-6.64	0.29	6.64	0.34	0.981907	3.81902e-16	0.979658	3.05343e-16	0.954564	0		56.91		56.91	120.8
FALSE	High	Master Protein	Q9H9G7	Protein argonaute-3 OS=Homo sapiens OX=9606 GN=AGO3 PE=1 SV=2	0	FALSE	21.292	8	5	17	1	1	860	97.3	9.11	53.82	5	cell organization and biogenesis;metabolic process;regulation of biological process;response to stimulus	chromosome;cytoplasm;cytosol;membrane	protein binding;RNA binding	Pf02170, Pf02171, Pf08699	192669	ENSG00000126070.19	AGO3; EIF2C3	1			0	1.316	0.01	0.889	100	1.17	0.4	-6.64	-0.17	6.64	0.23	0.700308	3.81902e-16	0.966571	3.05343e-16	0.971177	0		36.94		46.73	114.8
FALSE	High	None	P49810	Presenilin-2 OS=Homo sapiens OX=9606 GN=PSEN2 PE=1 SV=1	0.001	FALSE	6.47	3	1	1	1	1	448	50.1	4.59	4.2	1	metabolic process;regulation of biological process;response to stimulus;transport	cell surface;chromosome;endoplasmic reticulum;Golgi;membrane	catalytic activity;protein binding	Pf01080	5664	ENSG00000143801.16	PSEN2	1	Neurotrophin signaling pathway; Alzheimer's disease; Notch signaling pathway	Canonical and Non-canonical Notch signaling; Notch Signaling Pathway; Alzheimers Disease; Notch Signaling Pathway	0	100		1.402	100	100	6.64		0.49	6.64	6.64	4.12715e-16		0.887793	3.05343e-16	3.35161e-16			32.8
FALSE	Medium	Master Protein	O60858	E3 ubiquitin-protein ligase TRIM13 OS=Homo sapiens OX=9606 GN=TRIM13 PE=1 SV=2	0.033	FALSE	2.198	5	1	1	1	1	407	47	6.01	0	1	defense response;metabolic process;regulation of biological process;response to stimulus	cytoplasm;endoplasmic reticulum;membrane	catalytic activity;metal ion binding;protein binding;signal transducer activity	Pf00097, Pf00643, Pf12252, Pf13445, Pf13639, Pf13920, Pf13923, Pf14634, Pf15227	10206	ENSG00000204977.9	TRIM13	13			0	0.01	0.01	100	100	1.061	-6.64	-6.64	6.64	6.64	0.08	4.12715e-16	3.81902e-16	3.26911e-16	3.05343e-16	0.999969					319.07	194.1
FALSE	High	Master Protein	Q9H173	Nucleotide exchange factor SIL1 OS=Homo sapiens OX=9606 GN=SIL1 PE=1 SV=1	0	FALSE	9.911	9	3	3	3	1	461	52.1	5.36	6.94	3	metabolic process;transport	endoplasmic reticulum;organelle lumen	protein binding		64374	ENSG00000120725.12	SIL1	5	Protein processing in endoplasmic reticulum		0	100		1.014	100	100	6.64		0.02	6.64	6.64	4.12715e-16		0.999922	3.05343e-16	3.35161e-16			194.46
FALSE	High	None	A0A096LP55	Cytochrome b-c1 complex subunit 6-like, mitochondrial OS=Homo sapiens OX=9606 GN=UQCRHL PE=3 SV=1	0	FALSE	9.279	29	1	3	1	1	91	10.7	4.44	4.93	1	metabolic process;transport	membrane;mitochondrion	catalytic activity;transporter activity	Pf02320	440567	ENSG00000233954.6	UQCRHL	1	Huntington's disease; Parkinson's disease; Alzheimer's disease; Oxidative phosphorylation; Non-alcoholic fatty liver disease (NAFLD); Metabolic pathways; Cardiac muscle contraction		0	0.559	0.01	1.317	100	0.736	-0.84	-6.64	0.4	6.64	-0.44	0.153956	3.81902e-16	0.95004	3.05343e-16	0.839335	21.22		127.96		54.42	174.3
FALSE	High	Master Protein	P33552	Cyclin-dependent kinases regulatory subunit 2 OS=Homo sapiens OX=9606 GN=CKS2 PE=1 SV=1	0.001	FALSE	5.976	32	1	1	1	1	79	9.9	8.46	3.7	1	cell division;cell organization and biogenesis;cell proliferation;regulation of biological process		enzyme regulator activity;protein binding	Pf01111	1164	ENSG00000123975.4	CKS2	9	Pathways in cancer; Small cell lung cancer		0	1.01	0.01	1.791	100	1.808	0.01	-6.64	0.84	6.64	0.85	0.99186	3.81902e-16	0.381337	3.05343e-16	0.420666	0		0		0	104.8
FALSE	High	Master Protein	Q969K3	E3 ubiquitin-protein ligase RNF34 OS=Homo sapiens OX=9606 GN=RNF34 PE=1 SV=1	0.001	FALSE	5.233	5	1	2	1	1	372	41.6	4.96	4.7	1	cell death;metabolic process;regulation of biological process;response to stimulus	cytoplasm;cytosol;membrane;nucleus	catalytic activity;metal ion binding;protein binding	Pf13920, Pf13923	80196	ENSG00000170633.16	RNF34	12			0	1.085	0.01	0.775	100	0.857	0.12	-6.64	-0.37	6.64	-0.22	0.969619	3.81902e-16	0.906048	3.05343e-16	0.940234	41.65		27.24		40.17	140.2
FALSE	Medium	Master Protein	Q9BTM9	Ubiquitin-related modifier 1 OS=Homo sapiens OX=9606 GN=URM1 PE=1 SV=1	0.013	FALSE	2.971	13	1	1	1	1	101	11.4	4.67	2.48	1	metabolic process	cytoplasm;cytosol	catalytic activity;protein binding	Pf09138	81605	ENSG00000167118.10	URM1	9	Sulfur relay system		0	2.796	0.01	0.397	100	1.11	1.48	-6.64	-1.33	6.64	0.15	2.05184e-07	3.81902e-16	0.00931812	3.05343e-16	0.987944	175.8		27.7		0	81.5
FALSE	High	Master Protein	Q9NZM3	Intersectin-2 OS=Homo sapiens OX=9606 GN=ITSN2 PE=1 SV=3	0.001	FALSE	6.379	2	3	5	3	1	1697	193.3	8.12	1.71	3	cell differentiation;regulation of biological process;transport	cytoplasm	metal ion binding;protein binding	Pf00018, Pf00168, Pf00621, Pf07653, Pf12763, Pf14604	50618	ENSG00000198399.14	ITSN2	2			0	100		1.504	100	100	6.64		0.59	6.64	6.64	4.12715e-16		0.754832	3.05343e-16	3.35161e-16			1.48
FALSE	High	Master Protein	Q16363	Laminin subunit alpha-4 OS=Homo sapiens OX=9606 GN=LAMA4 PE=1 SV=4	0	FALSE	10.282	2	2	2	2	1	1823	202.4	6.28	7.15	2	cell organization and biogenesis;regulation of biological process;transport	cytoskeleton;extracellular;membrane	catalytic activity;motor activity;protein binding;structural molecule activity	Pf00053, Pf00054, Pf00529, Pf01576, Pf02210, Pf03302, Pf05483, Pf06008, Pf06009, Pf06160, Pf07888, Pf10174, Pf12128, Pf13385, Pf13868, Pf14662	3910		LAMA4	6	Amoebiasis; Pathways in cancer; Toxoplasmosis; Focal adhesion; Small cell lung cancer; ECM-receptor interaction; African trypanosomiasis; PI3K-Akt signaling pathway	Focal Adhesion-PI3K-Akt-mTOR-signaling pathway; Focal Adhesion; miRNA targets in ECM and membrane receptors	0	1.793	0.01	1.47	100	4.266	0.84	-6.64	0.56	6.64	2.09	0.288084	3.81902e-16	0.871862	3.05343e-16	0.00487226	0		75.98		0	60.9
FALSE	High	Master Protein	Q7RTV5	Peroxiredoxin-like 2C OS=Homo sapiens OX=9606 GN=PRXL2C PE=2 SV=1	0	FALSE	8.254	15	1	1	1	1	226	24.8	8.91	5.02	1	metabolic process		antioxidant activity;catalytic activity	Pf13911	195827	ENSG00000158122.11	AAED1	9			0	100		2.271	100	100	6.64		1.18	6.64	6.64	4.12715e-16		0.213204	3.05343e-16	3.35161e-16			0
FALSE	High	Master Protein	P83876	Thioredoxin-like protein 4A OS=Homo sapiens OX=9606 GN=TXNL4A PE=1 SV=1	0.002	FALSE	4.82	8	1	2	1	1	142	16.8	5.85	5.23	1	cell division;cell organization and biogenesis;cellular homeostasis;metabolic process;regulation of biological process	cytosol;membrane;nucleus;spliceosomal complex	protein binding	Pf00085, Pf02966	10907	ENSG00000141759.14	TXNL4A	18	Spliceosome	mRNA Processing	0	1.026	0.01	1.517	100	1.557	0.04	-6.64	0.6	6.64	0.64	0.991154	3.81902e-16	0.737106	3.05343e-16	0.795152	35.36		36.57		28.13	111.6
FALSE	High	Master Protein	O76062	Delta(14)-sterol reductase OS=Homo sapiens OX=9606 GN=TM7SF2 PE=2 SV=3	0.002	FALSE	4.366	3	1	1	1	1	418	46.4	8.87	3.51	1	metabolic process;regulation of biological process	endoplasmic reticulum;membrane	catalytic activity;nucleotide binding	Pf01222, Pf06966	7108	ENSG00000149809.14	TM7SF2	11	Steroid biosynthesis; Metabolic pathways		0	0.01	0.01	100	100	1.678	-6.64	-6.64	6.64	6.64	0.75	4.12715e-16	3.81902e-16	3.26911e-16	3.05343e-16	0.723513					77.44	149.4
FALSE	High	Master Protein	Q9BZM1	Group XIIA secretory phospholipase A2 OS=Homo sapiens OX=9606 GN=PLA2G12A PE=1 SV=1	0	FALSE	8.414	12	1	2	1	1	189	21.1	7.24	8.05	1	metabolic process;transport	cytoplasm;endoplasmic reticulum;extracellular;Golgi	catalytic activity;metal ion binding	Pf06951	81579	ENSG00000123739.10	PLA2G12A	4	Fat digestion and absorption; Ether lipid metabolism; Vascular smooth muscle contraction; Arachidonic acid metabolism; Linoleic acid metabolism; Pancreatic secretion; Glycerophospholipid metabolism; Ras signaling pathway; alpha-Linolenic acid metabolism; Metabolic pathways		0	0.799	0.01	1.006	100	0.804	-0.32	-6.64	0.01	6.64	-0.31	0.891331	3.81902e-16	0.99903	3.05343e-16	0.925543	14.46		0		14.64	153.6
FALSE	High	Master Protein	Q6ZSR9	Uncharacterized protein FLJ45252 OS=Homo sapiens OX=9606 PE=2 SV=2	0	FALSE	8.793	8	2	2	2	1	355	38	5.26	4.1	2				Pf15282							0	100		0.923	100	100	6.64		-0.12	6.64	6.64	4.12715e-16		0.988797	3.05343e-16	3.35161e-16			0
FALSE	Medium	Master Protein	O14684	Prostaglandin E synthase OS=Homo sapiens OX=9606 GN=PTGES PE=1 SV=2	0.031	FALSE	2.235	7	1	1	1	1	152	17.1	9.5	0	1	defense response;metabolic process;regulation of biological process;response to stimulus	cytoplasm;membrane	catalytic activity		9536	ENSG00000148344.10	PTGES	9	Arachidonic acid metabolism; Metabolic pathways	Eicosanoid Synthesis	0	0.967	0.01	1.054	100	1.019	-0.05	-6.64	0.08	6.64	0.03	0.981907	3.81902e-16	0.999922	3.05343e-16	0.995752	20.16		48.04		44.48	134
FALSE	High	Master Protein	Q96GX2	Ataxin-7-like protein 3B OS=Homo sapiens OX=9606 GN=ATXN7L3B PE=1 SV=2	0.001	FALSE	6.275	13	1	1	1	1	97	10.8	4.36	3.1	1		cytoplasm			552889	ENSG00000253719.3	ATXN7L3B	12			0	100		0.432	100	100	6.64		-1.21	6.64	6.64	4.12715e-16		0.0456882	3.05343e-16	3.35161e-16			39.9
FALSE	High	Master Protein	Q08170	Serine/arginine-rich splicing factor 4 OS=Homo sapiens OX=9606 GN=SRSF4 PE=1 SV=2	0	FALSE	13.575	6	3	26	1	1	494	56.6	11.52	62.68	3	metabolic process;regulation of biological process;response to stimulus;transport	nucleus	protein binding;RNA binding	Pf00076, Pf13893, Pf14259	6429	ENSG00000116350.16	SRSF4	1	Spliceosome; Herpes simplex infection	mRNA Processing	0	1.001	0.01	0.308	100	0.308	0	-6.64	-1.7	6.64	-1.7	0.987704	3.81902e-16	0.000214851	3.05343e-16	0.000642927	26.63		14.12		13.79	188.1
FALSE	High	Master Protein	Q8NG68	Tubulin--tyrosine ligase OS=Homo sapiens OX=9606 GN=TTL PE=1 SV=2	0.001	FALSE	5.279	7	1	1	1	1	377	43.2	6.74	4.44	1	cell organization and biogenesis;metabolic process;regulation of biological process		catalytic activity;nucleotide binding	Pf03133, Pf14398	150465	ENSG00000114999.7	TTL	2			0			100	100	100			6.64	6.64	6.64			3.26911e-16	3.05343e-16	3.35161e-16
FALSE	High	Master Protein	Q9BVI4	Nucleolar complex protein 4 homolog OS=Homo sapiens OX=9606 GN=NOC4L PE=1 SV=1	0.001	FALSE	5.979	5	1	1	1	1	516	58.4	7.49	2.51	1	metabolic process	membrane;nucleus	protein binding;RNA binding	Pf03914, Pf14838	79050	ENSG00000184967.6	NOC4L	12			0	0.961	0.01	2.53	100	2.431	-0.06	-6.64	1.34	6.64	1.28	0.999912	3.81902e-16	0.166393	3.05343e-16	0.249349	0		0		0	91.1
FALSE	High	Master Protein	Q9UJ83	2-hydroxyacyl-CoA lyase 1 OS=Homo sapiens OX=9606 GN=HACL1 PE=1 SV=2	0.002	FALSE	4.84	3	1	1	1	1	578	63.7	7.36	2.41	1	cell organization and biogenesis;metabolic process	organelle lumen	catalytic activity;metal ion binding;protein binding	Pf00205, Pf02552, Pf02775, Pf02776	26061	ENSG00000131373.14	HACL1	3	Peroxisome		0	3.454	0.01	0.873	100	3.015	1.79	-6.64	-0.2	6.64	1.59	0.000230984	3.81902e-16	0.978216	3.05343e-16	0.0866096	0		35.95		47.17	53.6
FALSE	High	Master Protein	Q8N4L2	Type 2 phosphatidylinositol 4,5-bisphosphate 4-phosphatase OS=Homo sapiens OX=9606 GN=PIP4P2 PE=1 SV=1	0.002	FALSE	4.956	10	1	3	1	1	257	28.1	8.68	2.36	1	metabolic process	endosome;membrane;vacuole	catalytic activity	Pf09788	55529	ENSG00000155099.7	TMEM55A; PIP4P2	8	Phosphatidylinositol signaling system		0	0.808	0.01	0.684	100	0.552	-0.31	-6.64	-0.55	6.64	-0.86	0.859398	3.81902e-16	0.774841	3.05343e-16	0.517253	6.15		0		2.88	169.5
FALSE	High	Master Protein	Q8N4Q0	Prostaglandin reductase 3 OS=Homo sapiens OX=9606 GN=ZADH2 PE=1 SV=1	0.002	FALSE	4.609	4	1	2	1	1	377	40.1	8.18	5.19	1	metabolic process;regulation of biological process	mitochondrion	catalytic activity;metal ion binding	Pf00107, Pf08240	284273	ENSG00000180011.6	ZADH2	18			0	0.756	0.01	1.411	100	1.066	-0.4	-6.64	0.5	6.64	0.09	0.634681	3.81902e-16	0.828219	3.05343e-16	0.993468	1.24		0		2.18	141.7
FALSE	High	Master Protein	O15446	DNA-directed RNA polymerase I subunit RPA34 OS=Homo sapiens OX=9606 GN=CD3EAP PE=1 SV=1	0	FALSE	16.391	12	3	6	3	1	510	55	8.51	10.06	3	metabolic process;regulation of biological process;response to stimulus	chromosome;cytosol;mitochondrion;nucleus	catalytic activity;RNA binding	Pf08208	10849	ENSG00000117877.10	CD3EAP	19			0	1.205	0.01	0.562	100	0.623	0.27	-6.64	-0.83	6.64	-0.68	0.806077	3.81902e-16	0.286741	3.05343e-16	0.591853	49.1		21.4		22.89	101.2
FALSE	High	Master Protein	P60484	Phosphatidylinositol 3,4,5-trisphosphate 3-phosphatase and dual-specificity protein phosphatase PTEN OS=Homo sapiens OX=9606 GN=PTEN PE=1 SV=1	0.001	FALSE	5.841	10	1	1	1	1	403	47.1	6.37	3.92	1	cell communication;cell death;cell organization and biogenesis;cell proliferation;cellular component movement;metabolic process;regulation of biological process;response to stimulus	cytoplasm;cytosol;extracellular;membrane;mitochondrion;nucleus	catalytic activity;metal ion binding;protein binding	Pf00102, Pf00782, Pf10409, Pf13350	5728	ENSG00000171862.10	PTEN	10	Tight junction; Hepatitis B; Central carbon metabolism in cancer; FoxO signaling pathway; MicroRNAs in cancer; Endometrial cancer; Breast cancer; Pathways in cancer; Prostate cancer; Glioma; Phosphatidylinositol signaling system; Inositol phosphate metabolism; Melanoma; EGFR tyrosine kinase inhibitor resistance; Focal adhesion; mTOR signaling pathway; p53 signaling pathway; Sphingolipid signaling…	Signaling of Hepatocyte Growth Factor Receptor; Androgen receptor signaling pathway; ESC Pluripotency Pathways; PI3K-AKT-mTOR signaling pathway and therapeutic opportunities; Pathways Affected in Adenoid Cystic Carcinoma; Signaling Pathways in Glioblastoma; DNA Damage Response (only ATM dependent); Senescence and Autophagy in Cancer; EGF/EGFR Signaling Pathway; Focal Adhesion; Focal Adhesion-PI3K…	0			100	100	100			6.64	6.64	6.64			3.26911e-16	3.05343e-16	3.35161e-16
FALSE	High	Master Protein	Q96CD2	Phosphopantothenoylcysteine decarboxylase OS=Homo sapiens OX=9606 GN=PPCDC PE=1 SV=2	0	FALSE	6.953	7	1	2	1	1	204	22.4	6.1	6.41	1	metabolic process	cytosol	catalytic activity;protein binding	Pf02441	60490	ENSG00000138621.11	PPCDC	15	Pantothenate and CoA biosynthesis; Metabolic pathways		0	100		1.065	100	100	6.64		0.09	6.64	6.64	4.12715e-16		0.999922	3.05343e-16	3.35161e-16			0
FALSE	Medium	Master Protein	P51511	Matrix metalloproteinase-15 OS=Homo sapiens OX=9606 GN=MMP15 PE=1 SV=1	0.039	FALSE	2.118	1	1	1	1	1	669	75.8	7.46	1.65	1	cell differentiation;cell organization and biogenesis;metabolic process;regulation of biological process;response to stimulus	membrane	catalytic activity;enzyme regulator activity;metal ion binding;protein binding	Pf00045, Pf00413, Pf01471, Pf07998, Pf11857	4324	ENSG00000102996.4	MMP15	16		Matrix Metalloproteinases	0	1.045	0.01	1.023	100	1.069	0.06	-6.64	0.03	6.64	0.1	0.987145	3.81902e-16	0.999922	3.05343e-16	0.995752	11.08		0		11.08	128.5
FALSE	High	Master Protein	Q53EP0	Fibronectin type III domain-containing protein 3B OS=Homo sapiens OX=9606 GN=FNDC3B PE=1 SV=2	0.002	FALSE	4.898	3	2	3	2	1	1204	132.8	5.95	0	2		membrane	protein binding;RNA binding	Pf00041	64778	ENSG00000075420.12	FNDC3B	3			0	1.144	0.01	0.967	100	1.106	0.19	-6.64	-0.05	6.64	0.15	0.931016	3.81902e-16	0.990597	3.05343e-16	0.985678	45.35		34.46		40.01	130.2
FALSE	High	Master Protein	Q709F0	Acyl-CoA dehydrogenase family member 11 OS=Homo sapiens OX=9606 GN=ACAD11 PE=1 SV=3	0	FALSE	9.068	4	1	1	1	1	780	87.2	8.02	4.74	1											0	1.85	0.01	0.825	100	1.527	0.89	-6.64	-0.28	6.64	0.61	0.202163	3.81902e-16	0.94153	3.05343e-16	0.827716	41.94		109.57		121.68	91.4
FALSE	Medium	Master Protein	O75113	NEDD4-binding protein 1 OS=Homo sapiens OX=9606 GN=N4BP1 PE=1 SV=4	0.024	FALSE	2.44	2	1	1	1	1	896	100.3	5.36	0	1	regulation of biological process;response to stimulus	nucleus	protein binding	Pf11977	9683	ENSG00000102921.7	N4BP1	16			0	1.194	0.01	0.981	100	1.171	0.26	-6.64	-0.03	6.64	0.23	0.866434	3.81902e-16	0.995224	3.05343e-16	0.970284	60.46		55.71		24.43	118.8
FALSE	High	Master Protein	Q14865	AT-rich interactive domain-containing protein 5B OS=Homo sapiens OX=9606 GN=ARID5B PE=1 SV=3	0.008	FALSE	3.424	1	1	1	1	1	1188	132.3	8.72	2.17	1	cell differentiation;cell organization and biogenesis;cellular component movement;metabolic process;regulation of biological process;response to stimulus	nucleus	catalytic activity;DNA binding;protein binding	Pf01388, Pf10243	84159	ENSG00000150347.14	ARID5B	10		Pathways Affected in Adenoid Cystic Carcinoma; Mesodermal Commitment Pathway; FTO Obesity Variant Mechanism	0	2.106	0.01	1.012	100	2.132	1.07	-6.64	0.02	6.64	1.09	0.108408	3.81902e-16	0.999922	3.05343e-16	0.398601	0		19.29		19.29	76.4
FALSE	High	Master Protein	Q9P0B6	Coiled-coil domain-containing protein 167 OS=Homo sapiens OX=9606 GN=CCDC167 PE=1 SV=2	0.001	FALSE	5.326	16	1	3	1	1	97	11.5	9.5	13.59	1		membrane		Pf15188	154467	ENSG00000198937.8	CCDC167	6			0	0.01	0.01	100	100	1.546	-6.64	-6.64	6.64	6.64	0.63	4.12715e-16	3.81902e-16	3.26911e-16	3.05343e-16	0.699044					96.07	157.1
FALSE	High	Master Protein	P53814	Smoothelin OS=Homo sapiens OX=9606 GN=SMTN PE=1 SV=7	0.009	FALSE	3.274	1	1	1	1	1	917	99	9.07	1.73	1		cytoplasm;cytoskeleton	protein binding;structural molecule activity	Pf00307, Pf11971, Pf12510	6525	ENSG00000183963.18	SMTN	22			0	0.655	0.01	1.463	100	0.983	-0.61	-6.64	0.55	6.64	-0.02	0.681529	3.81902e-16	0.869146	3.05343e-16	0.993441	4.66		51.91		49.04	157.5
FALSE	High	Master Protein	Q14849	StAR-related lipid transfer protein 3 OS=Homo sapiens OX=9606 GN=STARD3 PE=1 SV=2	0.005	FALSE	3.97	4	1	1	1	1	445	50.5	8.37	2.76	1	metabolic process;transport	cytoplasm;cytosol;endosome;membrane;mitochondrion	protein binding;transporter activity	Pf01852, Pf10457	10948	ENSG00000131748.15	STARD3	17			0	0.01	0.01	100	100	0.517	-6.64	-6.64	6.64	6.64	-0.95	4.12715e-16	3.81902e-16	3.26911e-16	3.05343e-16	0.467109					10.9	263.7
FALSE	Low	Master Protein	Q8WXC6	COP9 signalosome complex subunit 9 OS=Homo sapiens OX=9606 GN=COPS9 PE=1 SV=3	0.081	FALSE	1.543	65	1	1	1	1	57	6.2	3.83	0	1	regulation of biological process;response to stimulus	cytoplasm;nucleus	protein binding	Pf15004	150678	ENSG00000172428.10	MYEOV2; COPS9	2			0	100		0.517	100	100	6.64		-0.95	6.64	6.64	4.12715e-16		0.354309	3.05343e-16	3.35161e-16			9.24
FALSE	High	Master Protein	Q5PRF9	Protein Smaug homolog 2 OS=Homo sapiens OX=9606 GN=SAMD4B PE=1 SV=1	0.004	FALSE	4.015	3	1	1	1	1	694	75.4	6.83	2.7	1	metabolic process;regulation of biological process	cytoplasm;cytosol;nucleus	protein binding;RNA binding;translation regulator activity	Pf00536, Pf07647	55095	ENSG00000179134.15	SAMD4B	19			0	0.01	0.01	100	100	0.786	-6.64	-6.64	6.64	6.64	-0.35	4.12715e-16	3.81902e-16	3.26911e-16	3.05343e-16	0.898384					0	224
FALSE	High	Master Protein	Q9Y485	DmX-like protein 1 OS=Homo sapiens OX=9606 GN=DMXL1 PE=1 SV=3	0.002	FALSE	4.877	0	1	2	1	1	3027	337.6	6.34	1.83	1	cell organization and biogenesis;cellular homeostasis		protein binding	Pf00400, Pf12234	1657	ENSG00000172869.14	DMXL1	5			0	0.863	0.01	0.51	100	0.427	-0.21	-6.64	-0.97	6.64	-1.23	0.954606	3.81902e-16	0.294713	3.05343e-16	0.226262	7.83		20.09		14.08	176.7
FALSE	High	Master Protein	P01833	Polymeric immunoglobulin receptor OS=Homo sapiens OX=9606 GN=PIGR PE=1 SV=4	0	FALSE	7.781	3	1	1	1	1	764	83.2	5.74	4.37	1	cell organization and biogenesis;regulation of biological process;response to stimulus;transport	extracellular;membrane	receptor activity;signal transducer activity		5284	ENSG00000162896.5	PIGR	1	Intestinal immune network for IgA production		0	0.268	0.01	0.864	100	0.232	-1.9	-6.64	-0.21	6.64	-2.11	0.00158815	3.81902e-16	0.966571	3.05343e-16	0.00416135	13.37		108.28		4.19	266.7
TRUE	High	Master Protein	Q96K37	Solute carrier family 35 member E1 OS=Homo sapiens OX=9606 GN=SLC35E1 PE=1 SV=2	0	FALSE	17.231	6	2	6	2	1	410	44.7	9.79	20.97	2	transport	Golgi;membrane		Pf03151, Pf08449	79939	ENSG00000127526.14	SLC35E1	19			0	0.651	0.01	0.722	100	0.47	-0.62	-6.64	-0.47	6.64	-1.09	0.134836	3.81902e-16	0.662996	3.05343e-16	0.0572044	14.43		45.47		25.06	188.5
FALSE	High	Master Protein	Q9NYP9	Protein Mis18-alpha OS=Homo sapiens OX=9606 GN=MIS18A PE=1 SV=1	0	FALSE	7.157	19	2	3	2	1	233	25.8	5.2	3.29	2	cell division;cell organization and biogenesis;regulation of biological process	chromosome;cytosol;nucleus	metal ion binding;protein binding	Pf03226	54069	ENSG00000159055.3	MIS18A	21			0	1.181	0.01	0.402	100	0.53	0.24	-6.64	-1.31	6.64	-0.92	0.876913	3.81902e-16	0.0681387	3.05343e-16	0.483677	25.47		2.82		0.67	140.4
FALSE	Low	Master Protein	P29558	RNA-binding motif, single-stranded-interacting protein 1 OS=Homo sapiens OX=9606 GN=RBMS1 PE=1 SV=3	0.088	FALSE	1.473	9	1	1	1	1	406	44.5	8.79	0	1	metabolic process	nucleus	DNA binding;protein binding;RNA binding	Pf00076, Pf13893, Pf14259	5937	ENSG00000153250.19	RBMS1	2			0	0.01	0.01	100	100	0.149	-6.64	-6.64	6.64	6.64	-2.75	4.12715e-16	3.81902e-16	3.26911e-16	3.05343e-16	3.00234e-05					0	348.1
FALSE	High	Master Protein	O15554	Intermediate conductance calcium-activated potassium channel protein 4 OS=Homo sapiens OX=9606 GN=KCNN4 PE=1 SV=1	0.001	FALSE	5.376	4	1	3	1	1	427	47.7	9.83	11.46	1	cell organization and biogenesis;cellular homeostasis;defense response;regulation of biological process;response to stimulus;transport	membrane	protein binding;transporter activity	Pf02888, Pf03530, Pf07885	3783	ENSG00000104783.11	KCNN4	19	Protein digestion and absorption; Insulin secretion; Salivary secretion		0	2.219	0.01	0.224	100	0.496	1.15	-6.64	-2.16	6.64	-1.01	0.053427	3.81902e-16	0.000393346	3.05343e-16	0.437512	55.93		0		13.78	107.7
FALSE	High	Master Protein	O15321	Transmembrane 9 superfamily member 1 OS=Homo sapiens OX=9606 GN=TM9SF1 PE=2 SV=2	0	FALSE	8.262	6	2	2	2	1	606	68.8	7.17	6.6	2	metabolic process	membrane;vacuole		Pf02990	10548	ENSG00000100926.14	TM9SF1	14			0	100	100	16.575	14.43	100	6.64	6.64	4.05	3.85	6.64	4.12715e-16	3.81902e-16	7.18366e-14	3.05343e-16	3.35161e-16			134.79	134.98
FALSE	Medium	None	Q9BXT5	Testis-expressed protein 15 OS=Homo sapiens OX=9606 GN=TEX15 PE=1 SV=2	0.019	FALSE	2.677	0	1	4	1	1	2789	315.1	6.19	9.54	1	cell differentiation;cell organization and biogenesis;metabolic process;regulation of biological process;response to stimulus	cytoplasm;nucleus		Pf15326	56154	ENSG00000133863.7	TEX15	8			0	0.95	1.104	15.649	13.47	14.872	-0.07	0.14	3.97	3.75	3.89	0.992092	0.950768	3.26911e-16	3.05343e-16	8.95226e-12	2.03	2.25	34.22	34.22	34.2	22.3
FALSE	High	None	P02100	Hemoglobin subunit epsilon OS=Homo sapiens OX=9606 GN=HBE1 PE=1 SV=2	0.004	FALSE	4.032	7	1	1	1	1	147	16.2	8.63	3.4	1	cell organization and biogenesis;coagulation;response to stimulus;transport	cytosol	metal ion binding;protein binding;transporter activity	Pf00042	3046	ENSG00000213931.5	HBE1	11			0	0.01	0.093	100	9.842	0.92	-6.64	-3.42	6.64	3.3	-0.12	4.12715e-16	4.19605e-13	3.26911e-16	6.6496e-15	0.953713		1.89		564.26	147.84	198.7
FALSE	High	None	P69891	Hemoglobin subunit gamma-1 OS=Homo sapiens OX=9606 GN=HBG1 PE=1 SV=2	0.004	FALSE	4.032	7	1	1	1	1	147	16.1	7.2	3.4	1	coagulation;transport	cytosol	metal ion binding;transporter activity	Pf00042, Pf06133	3047		HBG1	11			0	0.01	0.093	100	9.842	0.92	-6.64	-3.42	6.64	3.3	-0.12	4.12715e-16	4.19605e-13	3.26911e-16	6.6496e-15	0.953713		1.89		564.26	147.84	198.7
FALSE	High	None	P69892	Hemoglobin subunit gamma-2 OS=Homo sapiens OX=9606 GN=HBG2 PE=1 SV=2	0.004	FALSE	4.032	7	1	1	1	1	147	16.1	7.2	3.4	1	coagulation;transport	cytosol	metal ion binding;protein binding;transporter activity	Pf00042, Pf06133	3048	ENSG00000196565.13	HBG2	11			0	0.01	0.093	100	9.842	0.92	-6.64	-3.42	6.64	3.3	-0.12	4.12715e-16	4.19605e-13	3.26911e-16	6.6496e-15	0.953713		1.89		564.26	147.84	198.7
FALSE	High	Master Protein	P02751	Fibronectin OS=Homo sapiens OX=9606 GN=FN1 PE=1 SV=4	0	FALSE	62.439	7	9	24	9	1	2386	262.5	5.71	81.71	9	cell differentiation;cell organization and biogenesis;cellular component movement;defense response;metabolic process;regulation of biological process;response to stimulus;transport	extracellular;membrane;organelle lumen	enzyme regulator activity;protein binding	Pf00039, Pf00040, Pf00041	2335	ENSG00000115414.18	FN1	2	Amoebiasis; Pathways in cancer; AGE-RAGE signaling pathway in diabetic complications; Focal adhesion; Proteoglycans in cancer; Regulation of actin cytoskeleton; Bacterial invasion of epithelial cells; Small cell lung cancer; ECM-receptor interaction; PI3K-Akt signaling pathway	miR-509-3p alteration of YAP1/ECM axis; TGF-B Signaling in Thyroid Cells for Epithelial-Mesenchymal Transition; Simplified Interaction Map Between LOXL4 and Oxidative Stress Pathway; Overview of nanoparticle effects; Senescence and Autophagy in Cancer; TGF-beta Signaling Pathway; Regulation of Actin Cytoskeleton; Focal Adhesion-PI3K-Akt-mTOR-signaling pathway; Association Between Physico-Chemical…	0	2.04	0.628	1.745	7.55	6.953	1.03	-0.67	0.8	2.92	2.8	3.61903e-07	0.848766	0.0250615	3.05343e-16	3.35161e-16	113.85	16.61	34.67	40.76	38.81	12.2
FALSE	High	Master Protein	Q9H330	Transmembrane protein 245 OS=Homo sapiens OX=9606 GN=TMEM245 PE=1 SV=3	0.002	FALSE	4.899	1	1	3	1	1	879	97.3	8.91	9.03	1											0	2.906	0.584	0.778	7.54	2.26	1.54	-0.78	-0.36	2.91	1.18	7.00628e-05	0.821377	0.829104	2.40916e-08	0.35411	105	48.37	21.66	427.69	103.69	61.9
FALSE	Low	Master Protein	Q9H4Y5	Glutathione S-transferase omega-2 OS=Homo sapiens OX=9606 GN=GSTO2 PE=1 SV=1	0.112	FALSE	1.279	4	1	1	1	1	243	28.2	7.56	0	1	cellular homeostasis;metabolic process;regulation of biological process;response to stimulus	cytoplasm;cytosol	antioxidant activity;catalytic activity;protein binding	Pf00462, Pf02798, Pf13409, Pf13417	119391	ENSG00000065621.14	GSTO2	10	Glutathione metabolism; Metabolism of xenobiotics by cytochrome P450; Drug metabolism - cytochrome P450; Chemical carcinogenesis; Platinum drug resistance	Metapathway biotransformation	0	0.583	0.211	2.677	7.385	1.561	-0.78	-2.24	1.42	2.88	0.64	0.530437	0.0150776	0.0792858	3.77484e-05	0.801072	0	0	12.69	12.69	12.69	119.2
FALSE	High	Master Protein	Q92504	Zinc transporter SLC39A7 OS=Homo sapiens OX=9606 GN=SLC39A7 PE=1 SV=2	0	FALSE	12.157	6	1	3	1	1	469	50.1	6.87	19.13	1	cellular homeostasis;transport	endoplasmic reticulum;Golgi;membrane	protein binding;transporter activity	Pf02535	7922	ENSG00000227402.11; ENSG00000112473.17; ENSG00000206288.13; ENSG00000226614.11; ENSG00000224399.11; ENSG00000229802.11	SLC39A7	6; CHR_HSCHR6_MHC_MANN_CTG1; CHR_HSCHR6_MHC_QBL_CTG1; CHR_HSCHR6_MHC_COX_CTG1; CHR_HSCHR6_MHC_MCF_CTG1; CHR_HSCHR6_MHC_DBB_CTG1		Zinc homeostasis; NRF2 pathway	0	0.791	0.72	6.267	6.88	4.955	-0.34	-0.47	2.65	2.78	2.31	0.729007	0.854075	3.26911e-16	3.05343e-16	7.67355e-11	0	0	0	0	0	53.6
FALSE	High	Master Protein	P07093	Glia-derived nexin OS=Homo sapiens OX=9606 GN=SERPINE2 PE=1 SV=1	0	FALSE	95.724	53	14	51	14	1	398	44	9.29	159.44	14	cell differentiation;cell organization and biogenesis;coagulation;development;regulation of biological process;response to stimulus;transport	cytosol;extracellular	enzyme regulator activity;protein binding	Pf00079	5270	ENSG00000135919.12	SERPINE2	2			0	3.365	0.69	0.972	6.442	3.48	1.75	-0.53	-0.04	2.69	1.8	4.12715e-16	0.703197	0.985712	3.05343e-16	1.4859e-10	79.55	26.94	126.92	116.02	138.66	30.6
FALSE	High	Master Protein	Q96BZ8	Leukocyte receptor cluster member 1 OS=Homo sapiens OX=9606 GN=LENG1 PE=1 SV=1	0	FALSE	6.827	9	1	2	1	1	264	30.5	9.69	3.12	1			protein binding		79165	ENSG00000278426.1; ENSG00000277457.1; ENSG00000276959.1; ENSG00000278516.1; ENSG00000276774.1; ENSG00000278257.1; ENSG00000275935.1; ENSG00000276628.1; ENSG00000277808.1	LENG1	19; CHR_HSCHR19LRC_LRC_T_CTG3_1; CHR_HSCHR19LRC_LRC_S_CTG3_1; CHR_HSCHR19_4_CTG3_1; CHR_HSCHR19LRC_PGF1_CTG3_1; CHR_HSCHR19LRC_COX2_CTG3_1; CHR_HSCHR19LRC_PGF2_CTG3_1; CHR_HSCHR19LRC_LRC_J_CTG3_1; CHR_HSCHR19LRC_LRC_I_CTG3_1; CHR_HSCHR19LRC_COX1_CTG3_1			0	0.764	0.952	3.351	6.106	2.561	-0.39	-0.07	1.74	2.61	1.36	0.733698	0.999876	3.23487e-06	3.05343e-16	0.0029589	10.09	75.16	0	27.44	17.29	84.3
FALSE	High	Master Protein	Q8WUZ0	B-cell CLL/lymphoma 7 protein family member C OS=Homo sapiens OX=9606 GN=BCL7C PE=1 SV=3	0	FALSE	13.82	38	3	7	3	1	217	23.5	5.2	15.15	3	cell death			Pf04714	9274	ENSG00000099385.11	BCL7C	16			0	0.236	1.597	8.273	5.637	1.948	-2.09	0.68	3.05	2.49	0.96	7.81746e-06	0.545588	1.90879e-07	6.30071e-08	0.564469	1.91	326.42	44.79	0	0	37.3
FALSE	High	Master Protein	O43759	Synaptogyrin-1 OS=Homo sapiens OX=9606 GN=SYNGR1 PE=1 SV=2	0.003	FALSE	4.238	5	1	2	1	1	233	25.4	4.68	5.06	1	cell organization and biogenesis;regulation of biological process;transport	membrane	protein binding	Pf01284	9145	ENSG00000100321.14	SYNGR1	22			0	0.66	0.679	6.536	5.598	3.761	-0.6	-0.56	2.71	2.48	1.91	0.480501	0.868472	1.6969e-08	5.2315e-08	0.000799672	17.64	7.25	23.74	7.78	6.36	66.6
FALSE	Low	Master Protein	Q7Z7A1	Centriolin OS=Homo sapiens OX=9606 GN=CNTRL PE=1 SV=2	0.096	FALSE	1.405	0	1	2	1	1	2325	268.7	5.55	0	1	cell division;metabolic process;regulation of biological process;transport	cytoplasm;cytoskeleton;cytosol;Golgi;membrane	catalytic activity;protein binding;transporter activity	Pf01496, Pf02463, Pf03961, Pf04111, Pf04156, Pf07888, Pf09730, Pf12128, Pf12252, Pf12799, Pf13514, Pf13855, Pf14580	11064	ENSG00000119397.16	CNTRL	9			0	0.703	0.588	4.669	5.588	3.284	-0.51	-0.77	2.22	2.48	1.72	0.766554	0.807356	0.0012215	0.000330966	0.0565849	13.52	37.58	0	104.52	27.33	71.8
FALSE	High	Master Protein	Q93096	Protein tyrosine phosphatase type IVA 1 OS=Homo sapiens OX=9606 GN=PTP4A1 PE=1 SV=2	0	FALSE	23.317	34	4	14	1	1	173	19.8	8.97	32.88	4	development;metabolic process;regulation of biological process	cytoplasm;cytoskeleton;endoplasmic reticulum;endosome;membrane;nucleus	catalytic activity;protein binding	Pf00102, Pf00782	7803	ENSG00000112245.10	PTP4A1	6			0	4.713	1.343	1.588	5.572	7.483	2.24	0.43	0.67	2.48	2.9	1.08573e-06	0.818473	0.67042	2.33075e-06	1.54432e-05	71.52	72.36	0	28.4	71.52	27.5
FALSE	Medium	None	Q14289	Protein-tyrosine kinase 2-beta OS=Homo sapiens OX=9606 GN=PTK2B PE=1 SV=2	0.013	FALSE	2.971	1	1	1	1	1	1009	115.8	6.25	1.72	1	cell death;cell differentiation;cell organization and biogenesis;cell proliferation;cellular component movement;cellular homeostasis;defense response;metabolic process;regulation of biological process;response to stimulus	cytoplasm;cytoskeleton;cytosol;membrane;nucleus	catalytic activity;nucleotide binding;protein binding;receptor activity;signal transducer activity;transporter activity	Pf00069, Pf00373, Pf03623, Pf07714	2185	ENSG00000120899.17	PTK2B	8	Hepatitis B; Phospholipase D signaling pathway; Natural killer cell mediated cytotoxicity; Leukocyte transendothelial migration; GnRH signaling pathway; Chemokine signaling pathway; Calcium signaling pathway	Brain-Derived Neurotrophic Factor (BDNF) signaling pathway; EGF/EGFR Signaling Pathway; IL-7 Signaling Pathway; IL-2 Signaling Pathway; Chemokine signaling pathway; Apoptosis-related network due to altered Notch3 in ovarian cancer; Oncostatin M Signaling Pathway; Signaling of Hepatocyte Growth Factor Receptor; T-Cell antigen Receptor (TCR) Signaling Pathway; VEGFA-VEGFR2 Signaling Pathway	0	0.793	0.175	1.248	5.487	1.024	-0.33	-2.51	0.32	2.46	0.03	0.826511	0.000982817	0.978216	0.000625012	0.993441	19.38	0.92	43.64	104.33	37.3	135.7
FALSE	Low	None	Q12816	Trophinin OS=Homo sapiens OX=9606 GN=TRO PE=1 SV=3	0.071	FALSE	1.664	1	1	2	1	1	1431	143.6	9.03	0	1	regulation of biological process	cytoplasm;membrane;nucleus	protein binding	Pf01454	7216	ENSG00000067445.20	TRO	X			0	0.884	0.175	1.065	5.317	0.934	-0.18	-2.51	0.09	2.41	-0.1	0.922665	0.0003921	0.999922	1.07422e-05	0.970284	20.12	0.87	39.23	35.72	25.11	130.3
FALSE	High	Master Protein	Q9Y6R0	Numb-like protein OS=Homo sapiens OX=9606 GN=NUMBL PE=1 SV=1	0.007	FALSE	3.509	2	1	1	1	1	609	64.9	8.85	2.66	1	cell division;cell organization and biogenesis;cell proliferation;development;metabolic process;regulation of biological process;response to stimulus	cytoplasm	protein binding	Pf00640, Pf06311, Pf08416	9253	ENSG00000105245.9	NUMBL	19	Notch signaling pathway	Notch Signaling Pathway; Notch Signaling Pathway	0	3.164	0.57	0.951	5.273	3.008	1.66	-0.81	-0.07	2.4	1.59	0.00208223	0.867076	0.988797	0.00204546	0.0726211	228.43	35.58	0	369.25	228.43	51.7
FALSE	High	Master Protein	O95926	Pre-mRNA-splicing factor SYF2 OS=Homo sapiens OX=9606 GN=SYF2 PE=1 SV=1	0	FALSE	9.659	15	2	2	2	1	243	28.7	8.4	5.49	2	cell organization and biogenesis;metabolic process;regulation of biological process;response to stimulus	nucleus;spliceosomal complex	protein binding;RNA binding	Pf08231	25949	ENSG00000117614.9	SYF2	1	Spliceosome		0	1.117	0.986	2.624	5.251	2.931	0.16	-0.02	1.39	2.39	1.55	0.945558	0.997657	0.0277159	1.34449e-07	0.0373218	60.85	66.95	128.64	49.01	121.66	71.3
FALSE	High	Master Protein	Q8N668	COMM domain-containing protein 1 OS=Homo sapiens OX=9606 GN=COMMD1 PE=1 SV=1	0.002	FALSE	4.719	9	1	2	1	1	190	21.2	6.2	4.44	1	metabolic process;regulation of biological process;transport	cytoplasm;cytosol;endosome;membrane;nucleus	metal ion binding;protein binding	Pf07258	150684	ENSG00000173163.10	COMMD1	2		Copper homeostasis	0	4.04	1.055	1.344	5.147	5.428	2.01	0.08	0.43	2.36	2.44	4.52216e-14	0.980861	0.865188	1.79255e-07	2.04814e-06	97.72	130.14	41.86	100.1	99.62	34.7
FALSE	High	Master Protein	Q58FF6	Putative heat shock protein HSP 90-beta 4 OS=Homo sapiens OX=9606 GN=HSP90AB4P PE=5 SV=1	0	FALSE	67.899	14	9	283	2	1	505	58.2	4.73	643.76	9	metabolic process;response to stimulus	cytoplasm	nucleotide binding;protein binding	Pf00183, Pf02518, Pf13589	664618		HSP90AB4P	15			0	2.27	1.053	2.375	5.119	5.392	1.18	0.08	1.25	2.36	2.43	0.00992387	0.975783	0.018734	1.56955e-09	1.35814e-07	0	0	0	0	0	41.2
FALSE	High	Master Protein	Q9BVA1	Tubulin beta-2B chain OS=Homo sapiens OX=9606 GN=TUBB2B PE=1 SV=1	0	FALSE	503.145	84	30	2532	1	1	445	49.9	4.89	8277.65	30	cell organization and biogenesis;cellular component movement;regulation of biological process	cytoplasm;cytoskeleton;nucleus	catalytic activity;nucleotide binding;protein binding;structural molecule activity	Pf00091, Pf03953, Pf10644	347733	ENSG00000137285.9	TUBB2B	6	Pathogenic Escherichia coli infection; Gap junction; Phagosome	Parkin-Ubiquitin Proteasomal System pathway; Pathogenic Escherichia coli infection	0	1.289	0.477	1.389	5.023	2.391	0.37	-1.07	0.47	2.33	1.26	0.818206	0.55587	0.910291	0.000314979	0.308485	105.7	13.89	88.05	52.19	51.82	90.2
FALSE	High	Master Protein	P53609	Geranylgeranyl transferase type-1 subunit beta OS=Homo sapiens OX=9606 GN=PGGT1B PE=1 SV=2	0.001	FALSE	5.985	6	2	5	2	1	377	42.3	6.83	9.55	2	metabolic process;regulation of biological process;response to stimulus		catalytic activity;metal ion binding	Pf00432, Pf13249	5229	ENSG00000164219.9	PGGT1B	5			0	0.844	0.206	1.895	5.01	1.366	-0.25	-2.28	0.92	2.32	0.45	0.863173	0.000133298	0.426432	5.88454e-05	0.88909	49.15	1.06	80.75	89.05	72.55	143.9
FALSE	High	Master Protein	Q7Z794	Keratin, type II cytoskeletal 1b OS=Homo sapiens OX=9606 GN=KRT77 PE=2 SV=3	0	FALSE	13.135	5	4	38	1	1	578	61.9	5.99	77.42	4	cell death;cell organization and biogenesis	cytoskeleton;cytosol	structural molecule activity	Pf00038, Pf03962, Pf13166, Pf14817	374454	ENSG00000189182.9	KRT77	12			0	1.247	0.284	1.14	4.996	1.421	0.32	-1.81	0.19	2.32	0.51	0.729747	0.00802727	0.988797	8.90446e-07	0.836111	33.22	18.55	41.27	184.39	46.53	101.2
FALSE	High	Master Protein	Q8NHP6	Motile sperm domain-containing protein 2 OS=Homo sapiens OX=9606 GN=MOSPD2 PE=1 SV=1	0.002	FALSE	5.099	2	1	1	1	1	518	59.7	5.96	2.36	1	regulation of biological process;response to stimulus;transport	membrane		Pf00635, Pf00650, Pf13716	158747	ENSG00000130150.11	MOSPD2	X			0	0.646	0.308	2.4	4.901	1.656	-0.63	-1.7	1.26	2.29	0.73	0.369354	0.0632185	0.0956387	1.26956e-05	0.669384	24.31	0.96	46	28.72	26.2	115.5
FALSE	High	Master Protein	Q5JS54	Proteasome assembly chaperone 4 OS=Homo sapiens OX=9606 GN=PSMG4 PE=1 SV=2	0	FALSE	15.119	20	1	6	1	1	123	13.8	6.52	18.37	1	cell organization and biogenesis				389362	ENSG00000180822.11	PSMG4	6			0	6.55	0.567	0.916	4.836	2.741	2.71	-0.82	-0.13	2.27	1.45	4.12715e-16	0.525204	0.964377	5.5035e-08	0.00992272	0.95	19.91	124.24	65.2	67.21	27
FALSE	Medium	None	O15078	Centrosomal protein of 290 kDa OS=Homo sapiens OX=9606 GN=CEP290 PE=1 SV=2	0.028	FALSE	2.311	0	1	4	1	1	2479	290.2	5.95	4.9	1	cell organization and biogenesis;regulation of biological process;transport	cytoplasm;cytoskeleton;cytosol;extracellular;membrane;nucleus;organelle lumen	protein binding		80184	ENSG00000198707.14	CEP290	12			0	0.806	0.197	0.907	4.807	0.748	-0.31	-2.34	-0.14	2.27	-0.42	0.861738	0.00301617	0.987795	0.000460371	0.8694	11.88	4.53	33.41	96.5	31.46	141.5
FALSE	Low	None	P53804	E3 ubiquitin-protein ligase TTC3 OS=Homo sapiens OX=9606 GN=TTC3 PE=1 SV=2	0.053	FALSE	1.871	0	1	4	0	2	2025	229.7	7.52	0	1	metabolic process	cytosol;nucleus	catalytic activity;metal ion binding;protein binding	Pf00097, Pf12678, Pf13414, Pf13424, Pf13431, Pf13639, Pf13923, Pf14634	7267	ENSG00000182670.13	TTC3	21			0	1.075	0.158	1.598	4.715	0.744	0.1	-2.66	0.68	2.24	-0.43	0.955399	0.000370095	0.753288	0.00688452	0.884745	95.24	0.47	108.32	98.7	54.56	134.4
FALSE	Low	None	Q86VV8	Rotatin OS=Homo sapiens OX=9606 GN=RTTN PE=1 SV=3	0.053	FALSE	1.871	0	1	4	0	2	2226	248.5	6.7	0	1	cell organization and biogenesis;development	cytoplasm;cytoskeleton		Pf14726	25914	ENSG00000176225.13	RTTN	18			0	1.075	0.158	1.598	4.715	0.744	0.1	-2.66	0.68	2.24	-0.43	0.955399	0.000370095	0.753288	0.00688452	0.884745	95.24	0.47	108.32	98.7	54.56	134.4
FALSE	Low	Master Protein	Q8IYS5	Osteoclast-associated immunoglobulin-like receptor OS=Homo sapiens OX=9606 GN=OSCAR PE=1 SV=3	0.076	FALSE	1.591	17	1	1	1	1	282	30.5	6.52	0	1	regulation of biological process;transport	extracellular;membrane;organelle lumen	protein binding	Pf13895	126014	ENSG00000274703.4; ENSG00000277088.4; ENSG00000278378.4; ENSG00000275644.4; ENSG00000275551.4; ENSG00000276982.4; ENSG00000273511.4; ENSG00000278533.4; ENSG00000275736.4	OSCAR	19; CHR_HSCHR19LRC_LRC_S_CTG3_1; CHR_HSCHR19LRC_PGF1_CTG3_1; CHR_HSCHR19LRC_PGF2_CTG3_1; CHR_HSCHR19LRC_COX2_CTG3_1; CHR_HSCHR19LRC_LRC_T_CTG3_1; CHR_HSCHR19LRC_LRC_J_CTG3_1; CHR_HSCHR19LRC_COX1_CTG3_1; CHR_HSCHR19LRC_LRC_I_CTG3_1; CHR_HSCHR19_4_CTG3_1	Osteoclast differentiation		0	0.81	0.206	1.191	4.676	0.964	-0.3	-2.28	0.25	2.23	-0.05	0.899431	0.00523222	0.988797	0.00443677	0.989349	58.51	2.29	67.11	146.13	95.2	134.2
FALSE	High	Master Protein	Q9BUB5	MAP kinase-interacting serine/threonine-protein kinase 1 OS=Homo sapiens OX=9606 GN=MKNK1 PE=1 SV=1	0.002	FALSE	5.11	4	1	1	1	1	465	51.3	6.68	3.36	1	metabolic process;regulation of biological process;response to stimulus	cytoplasm;cytosol;nucleus	catalytic activity;metal ion binding;nucleotide binding;protein binding	Pf00069, Pf07714	8569	ENSG00000079277.19	MKNK1	1	Insulin signaling pathway; HIF-1 signaling pathway; MAPK signaling pathway	BDNF-TrkB Signaling; VEGFA-VEGFR2 Signaling Pathway; MAPK Signaling Pathway; 4-hydroxytamoxifen, Dexamethasone, and Retinoic Acids Regulation of p27 Expression; Structural Pathway of Interleukin 1 (IL-1); p38 MAPK Signaling Pathway	0	1.188	0.497	1.956	4.671	2.323	0.25	-1.01	0.97	2.22	1.22	0.866434	0.509339	0.229749	3.32501e-06	0.0868508	68.4	26.96	83.09	188.2	95.23	79.9
FALSE	Low	Master Protein	Q5JS37	NHL repeat-containing protein 3 OS=Homo sapiens OX=9606 GN=NHLRC3 PE=2 SV=1	0.086	FALSE	1.497	3	1	1	1	1	347	38.3	6.43	1.62	1	transport	extracellular;organelle lumen	protein binding	Pf01436	387921	ENSG00000188811.13	NHLRC3	13			0	100	100	6.811	4.462	100	6.64	6.64	2.77	2.16	6.64	4.12715e-16	3.81902e-16	1.77999e-05	0.00126761	3.35161e-16			32.4	12.22
FALSE	High	Master Protein	Q9NVH6	Trimethyllysine dioxygenase, mitochondrial OS=Homo sapiens OX=9606 GN=TMLHE PE=1 SV=1	0.002	FALSE	5.044	6	2	3	2	1	421	49.5	7.72	4.86	2	metabolic process;regulation of biological process	mitochondrion;organelle lumen	catalytic activity;metal ion binding	Pf02668	55217	ENSG00000185973.10	TMLHE	X	Lysine degradation		0	100	100	8.539	4.457	100	6.64	6.64	3.09	2.16	6.64	4.12715e-16	3.81902e-16	2.44947e-07	0.000164171	3.35161e-16			111.77	188.14
FALSE	Medium	None	Q9H0R8	Gamma-aminobutyric acid receptor-associated protein-like 1 OS=Homo sapiens OX=9606 GN=GABARAPL1 PE=1 SV=1	0.012	FALSE	2.988	10	1	5	1	1	117	14	8.73	10.71	1	cell communication;cell organization and biogenesis;metabolic process;response to stimulus	cytoplasm;cytoskeleton;cytosol;endoplasmic reticulum;Golgi;membrane;mitochondrion;vacuole	protein binding	Pf02991, Pf04110	23710	ENSG00000139112.10	GABARAPL1	12	NOD-like receptor signaling pathway; FoxO signaling pathway; Autophagy; GABAergic synapse	Senescence and Autophagy in Cancer	0	0.593	0.159	1.168	4.36	0.793	-0.76	-2.66	0.22	2.12	-0.33	0.164567	0.000256123	0.988797	0.000264747	0.88985	8.6	2.13	32.87	95.67	25.97	163.7
FALSE	High	Master Protein	O95166	Gamma-aminobutyric acid receptor-associated protein OS=Homo sapiens OX=9606 GN=GABARAP PE=1 SV=1	0.002	FALSE	4.891	20	2	6	2	1	117	13.9	8.79	13.45	2	cell communication;cell death;cell organization and biogenesis;metabolic process;regulation of biological process;response to stimulus;transport	cytoplasm;cytoskeleton;cytosol;endoplasmic reticulum;Golgi;membrane;vacuole	protein binding	Pf02991, Pf04110	11337	ENSG00000170296.9	GABARAP	17	NOD-like receptor signaling pathway; FoxO signaling pathway; Autophagy; GABAergic synapse	Senescence and Autophagy in Cancer	0	0.573	0.159	1.417	4.36	0.85	-0.8	-2.66	0.5	2.12	-0.23	0.0808016	0.000225047	0.829858	4.24313e-05	0.93056	5.25	2.99	10.28	110.86	17.98	144.1
FALSE	High	None	Q14CN4	Keratin, type II cytoskeletal 72 OS=Homo sapiens OX=9606 GN=KRT72 PE=1 SV=2	0	TRUE	11.574	4	3	34	1	1	511	55.8	6.89	74.03	3	cell death	cytosol	protein binding;structural molecule activity	Pf00038, Pf05622, Pf08614, Pf12128, Pf13514	140807	ENSG00000170486.10	KRT72	12			0	0.626	2.44	16.968	4.207	6.366	-0.67	1.29	4.08	2.07	2.67	0.394841	0.0365623	3.26911e-16	3.05343e-16	2.19718e-14	41.7	86.07	125.52	116.76	138.77	43.2
FALSE	High	Master Protein	Q9BVT8	Transmembrane and ubiquitin-like domain-containing protein 1 OS=Homo sapiens OX=9606 GN=TMUB1 PE=1 SV=1	0.003	FALSE	4.116	12	1	2	1	1	246	26.2	5.72	2.24	1	metabolic process	cytoplasm;cytoskeleton;cytosol;endosome;membrane;nucleus	protein binding	Pf00240, Pf10302, Pf13881	83590	ENSG00000164897.12	TMUB1	7			0	2.091	0.693	1.362	4.11	2.847	1.06	-0.53	0.45	2.04	1.51	0.0467146	0.937663	0.914622	0.00106693	0.129989	0	17.05	0	35.52	0	60.3
FALSE	High	Master Protein	P20336	Ras-related protein Rab-3A OS=Homo sapiens OX=9606 GN=RAB3A PE=1 SV=1	0	FALSE	24.243	30	6	39	1	1	220	25	5.03	96.24	6	cell communication;cell organization and biogenesis;metabolic process;regulation of biological process;response to stimulus;transport	cytosol;endosome;membrane	catalytic activity;enzyme regulator activity;nucleotide binding;protein binding	Pf00025, Pf00071, Pf08477, Pf09439	5864	ENSG00000105649.9	RAB3A	19	Insulin secretion; Synaptic vesicle cycle	Brain-Derived Neurotrophic Factor (BDNF) signaling pathway; Synaptic Vesicle Pathway	0	1.37	0.481	1.369	4.068	1.957	0.45	-1.06	0.45	2.02	0.97	0.749811	0.60538	0.936788	0.0233969	0.511551	20.96	4.99	16.4	0	21.55	82.2
FALSE	High	None	Q9Y3E1	Hepatoma-derived growth factor-related protein 3 OS=Homo sapiens OX=9606 GN=HDGFL3 PE=1 SV=1	0	FALSE	10.603	12	2	5	1	1	203	22.6	7.99	18.49	2	cell organization and biogenesis;cell proliferation;regulation of biological process	cytoplasm;cytosol;extracellular;nucleus	protein binding	Pf00855	50810	ENSG00000166503.8	HDGFRP3; HDGFL3	15			0	7.348	1.178	0.898	4.018	6.598	2.88	0.24	-0.16	2.01	2.72	4.12715e-16	0.924818	0.950941	3.75394e-05	3.9905e-06	20.62	87.24	0	87.24	20.62	24.1
FALSE	High	Master Protein	P06753	Tropomyosin alpha-3 chain OS=Homo sapiens OX=9606 GN=TPM3 PE=1 SV=2	0	FALSE	88.035	31	14	136	7	1	285	32.9	4.72	388.9	14	cell organization and biogenesis;cellular component movement	cytoplasm;cytoskeleton;cytosol	protein binding;structural molecule activity	Pf00261, Pf12718	7170	ENSG00000143549.19	TPM3	1	Dilated cardiomyopathy; Pathways in cancer; Adrenergic signaling in cardiomyocytes; Thyroid cancer; Cardiac muscle contraction; Hypertrophic cardiomyopathy (HCM)	Striated Muscle Contraction	2	0.813	0.327	1.278	3.952	1.017	-0.3	-1.61	0.35	1.98	0.02	0.118692	2.38453e-06	0.576175	3.05343e-16	0.975532	55.53	13.11	94.83	113.97	94.32	152.1
FALSE	High	Master Protein	Q96PM9	Zinc finger protein 385A OS=Homo sapiens OX=9606 GN=ZNF385A PE=1 SV=2	0.002	FALSE	4.854	3	1	1	1	1	386	40.4	9.86	2.36	1	cell death;cell differentiation;cell organization and biogenesis;metabolic process;regulation of biological process;response to stimulus	cytoplasm;nucleus	DNA binding;metal ion binding;protein binding;RNA binding	Pf07535, Pf12171, Pf12874	25946	ENSG00000161642.17	ZNF385A	12			0	0.862	0.343	1.706	3.945	1.396	-0.21	-1.54	0.77	1.98	0.48	0.905243	0.13606	0.535903	0.000216998	0.882144	29.39	8.05	40.28	102.77	21.67	112.4
FALSE	High	Master Protein	Q86VP1	Tax1-binding protein 1 OS=Homo sapiens OX=9606 GN=TAX1BP1 PE=1 SV=2	0.003	FALSE	4.206	2	1	1	1	1	789	90.8	5.43	2.37	1	cell death;cell organization and biogenesis;cellular component movement;metabolic process;regulation of biological process	cytosol	catalytic activity;metal ion binding;motor activity;protein binding	Pf01576, Pf02463, Pf04156, Pf05483, Pf05557, Pf05622, Pf05911, Pf07888, Pf09304, Pf09726, Pf10174, Pf11559, Pf12128, Pf12718, Pf13166, Pf13851	8887	ENSG00000106052.13	TAX1BP1	7			0	0.721	0.427	2.281	3.855	1.645	-0.47	-1.23	1.19	1.95	0.72	0.764501	0.412494	0.271487	0.00564349	0.811435	0	28.14	0	154.53	0	105.4
FALSE	High	Master Protein	O95235	Kinesin-like protein KIF20A OS=Homo sapiens OX=9606 GN=KIF20A PE=1 SV=1	0	FALSE	10.047	4	3	4	3	1	890	100.2	6.92	4.17	3	cell organization and biogenesis;cellular component movement;transport	cytoplasm;cytoskeleton;Golgi	catalytic activity;motor activity;nucleotide binding;protein binding;transporter activity	Pf00225	10112	ENSG00000112984.11	KIF20A	5			0	0.79	0.255	1.024	3.78	0.932	-0.34	-1.97	0.03	1.92	-0.1	0.902551	0.0597091	0.999922	0.034695	0.977425	21.71	4.24	21.17	66.56	14.08	128.1
FALSE	Low	Master Protein	Q15361	Transcription termination factor 1 OS=Homo sapiens OX=9606 GN=TTF1 PE=1 SV=3	0.124	FALSE	1.206	4	1	1	1	1	905	103	9.38	0	1	cell differentiation;cell organization and biogenesis;metabolic process;regulation of biological process	cytosol;membrane;nucleus	DNA binding	Pf13921	7270	ENSG00000125482.12	TTF1	9	Thyroid hormone synthesis	Human Thyroid Stimulating Hormone (TSH) signaling pathway	0	1.297	0.67	2.11	3.752	2.737	0.38	-0.58	1.08	1.91	1.45	0.833378	0.954648	0.349612	0.0408271	0.129989	28.6	10.39	114.01	138.43	108.81	74.4
FALSE	Medium	None	A8MVJ9	Putative histone PARylation factor 1-like OS=Homo sapiens OX=9606 PE=5 SV=1	0.019	FALSE	2.661	3	1	2	1	1	347	39.7	8.1	2.06	1				Pf10228							0	100	100	1.054	3.718	100	6.64	6.64	0.08	1.89	6.64	4.12715e-16	3.81902e-16	0.999922	0.0430605	3.35161e-16			89.04	231.09
FALSE	High	Master Protein	P02452	Collagen alpha-1(I) chain OS=Homo sapiens OX=9606 GN=COL1A1 PE=1 SV=5	0	FALSE	11.056	3	3	5	3	1	1464	138.9	5.8	12.68	3	cell communication;cell differentiation;cell organization and biogenesis;cellular component movement;coagulation;metabolic process;regulation of biological process;response to stimulus;transport	cytoplasm;endoplasmic reticulum;extracellular;Golgi;organelle lumen	metal ion binding;protein binding;structural molecule activity	Pf00093, Pf01391, Pf01410	1277		COL1A1	17	Amoebiasis; Protein digestion and absorption; AGE-RAGE signaling pathway in diabetic complications; Focal adhesion; ECM-receptor interaction; PI3K-Akt signaling pathway; Platelet activation	Focal Adhesion-PI3K-Akt-mTOR-signaling pathway; Inflammatory Response Pathway; Focal Adhesion; miR-509-3p alteration of YAP1/ECM axis; Senescence and Autophagy in Cancer; Osteoblast Signaling	0	100	100	1.388	3.659	100	6.64	6.64	0.47	1.87	6.64	4.12715e-16	3.81902e-16	0.863572	0.000253927	3.35161e-16			34.13	24.81
FALSE	High	Master Protein	Q9NRD1	F-box only protein 6 OS=Homo sapiens OX=9606 GN=FBXO6 PE=1 SV=1	0	FALSE	9.821	17	2	6	2	1	293	33.9	6.09	17.17	2	metabolic process;response to stimulus	cytoplasm;cytosol	catalytic activity;protein binding	Pf00646, Pf04300, Pf12937	26270	ENSG00000116663.10	FBXO6	1	Protein processing in endoplasmic reticulum		0	0.466	0.507	2.269	3.657	1.056	-1.1	-0.98	1.18	1.87	0.08	0.0106746	0.309518	0.0773554	2.91867e-05	0.995752	18.96	0	0.34	0	87.83	126.2
FALSE	Low	Master Protein	P08F94	Fibrocystin OS=Homo sapiens OX=9606 GN=PKHD1 PE=1 SV=1	0.11	FALSE	1.292	0	1	4	1	1	4074	446.4	6.57	0	1	cell organization and biogenesis;cellular homeostasis;regulation of biological process	chromosome;cytoplasm;cytoskeleton;membrane	protein binding;receptor activity	Pf01833, Pf10162, Pf13229	5314	ENSG00000170927.14	PKHD1	6			0	0.813	0.596	1.355	3.613	2.155	-0.3	-0.75	0.44	1.85	1.11	0.927982	0.848766	0.935569	0.0450668	0.387938	59.22	1.01	130.52	13.4	13.43	87.6
FALSE	Low	Master Protein Candidate	O00481	Butyrophilin subfamily 3 member A1 OS=Homo sapiens OX=9606 GN=BTN3A1 PE=1 SV=3	0.065	FALSE	1.701	1	1	5	1	1	513	57.6	8.03	3.42	1	cell proliferation;regulation of biological process;response to stimulus;transport	membrane	protein binding	Pf00622, Pf07679, Pf08205, Pf13765	11119	ENSG00000026950.16	BTN3A1	6			0	1.381	0.914	2.42	3.607	3.488	0.47	-0.13	1.28	1.85	1.8	0.716685	0.999876	0.207441	0.028324	0.030995	20.63	14.27	37.6	39.63	17.4	59
FALSE	Low	Master Protein	Q5TB80	Centrosomal protein of 162 kDa OS=Homo sapiens OX=9606 GN=CEP162 PE=1 SV=2	0.065	FALSE	1.701	0	1	5	1	1	1403	161.8	5.47	3.42	1	cell organization and biogenesis	cytoplasm;cytoskeleton;cytosol;nucleus	protein binding		22832	ENSG00000135315.11	KIAA1009; CEP162	6			0	1.381	0.914	2.42	3.607	3.488	0.47	-0.13	1.28	1.85	1.8	0.716685	0.999876	0.207441	0.028324	0.030995	20.63	14.27	37.6	39.63	17.4	59
FALSE	High	Master Protein	Q6ZRS2	Helicase SRCAP OS=Homo sapiens OX=9606 GN=SRCAP PE=1 SV=3	0.009	FALSE	3.248	0	2	5	2	1	3230	343.3	5.96	2.33	2	cell organization and biogenesis;metabolic process;regulation of biological process	Golgi;nucleus	catalytic activity;DNA binding;nucleotide binding;protein binding	Pf00176, Pf00271, Pf07529	10847	ENSG00000080603.16	SRCAP	16		Pathways Affected in Adenoid Cystic Carcinoma	0	1.252	0.095	1.045	3.592	1.308	0.32	-3.39	0.06	1.84	0.39	0.436846	5.52078e-12	0.999922	4.0955e-06	0.820002	140.53	1.18	143.24	146.43	143.24	110.1
FALSE	High	Master Protein	O00220	Tumor necrosis factor receptor superfamily member 10A OS=Homo sapiens OX=9606 GN=TNFRSF10A PE=1 SV=3	0.003	FALSE	4.304	3	1	3	1	1	468	50.1	7.03	9.11	1	cell death;cellular component movement;defense response;development;metabolic process;regulation of biological process;response to stimulus	cell surface;membrane	protein binding;receptor activity;signal transducer activity	Pf00020, Pf00531	8797	ENSG00000104689.9	TNFRSF10A	8	Cytokine-cytokine receptor interaction; Natural killer cell mediated cytotoxicity; Apoptosis; Measles; Influenza A		0	1.217	0.541	1.357	3.552	1.922	0.28	-0.89	0.44	1.83	0.94	0.847085	0.666733	0.887106	0.000346067	0.471249	50.95	11.54	60.47	53.74	13.13	82
FALSE	Low	Master Protein	Q70EL4	Ubiquitin carboxyl-terminal hydrolase 43 OS=Homo sapiens OX=9606 GN=USP43 PE=1 SV=2	0.079	FALSE	1.562	2	1	5	1	1	1123	122.7	9.19	0	1	metabolic process;response to stimulus	nucleus	catalytic activity	Pf00443, Pf13423	124739	ENSG00000154914.16	USP43	17			0	0.622	0.452	1.778	3.47	1.105	-0.69	-1.15	0.83	1.79	0.14	0.413888	0.481017	0.633196	0.0265519	0.994878	32.16	52.81	81.99	179.68	2.2	125.9
FALSE	Low	Master Protein	Q8IZD4	mRNA-decapping enzyme 1B OS=Homo sapiens OX=9606 GN=DCP1B PE=1 SV=2	0.091	FALSE	1.448	4	1	5	1	1	617	67.7	8.56	0	1	metabolic process;regulation of biological process	cytoplasm;cytosol;membrane;nucleus	catalytic activity;enzyme regulator activity;protein binding;RNA binding	Pf06058	196513	ENSG00000151065.13	DCP1B	12	RNA degradation		0	0.01	0.317	100	3.37	1.068	-6.64	-1.66	6.64	1.75	0.1	4.12715e-16	0.12997	3.26911e-16	0.131776	0.991949		0		24.61	24.61	167.7
FALSE	Low	Master Protein	Q9ULD9	Zinc finger protein 608 OS=Homo sapiens OX=9606 GN=ZNF608 PE=1 SV=4	0.162	FALSE	1.051	1	1	1	1	1	1512	162.1	8.79	0	1	metabolic process;regulation of biological process		metal ion binding		57507	ENSG00000168916.15	ZNF608	5			0	0.605	0.229	1.272	3.365	0.769	-0.73	-2.13	0.35	1.75	-0.38	0.584745	0.0343606	0.966221	0.140623	0.915192	22.49	0	61.5	0	0	153.7
FALSE	High	Master Protein	Q9BVS5	tRNA (adenine(58)-N(1))-methyltransferase, mitochondrial OS=Homo sapiens OX=9606 GN=TRMT61B PE=1 SV=2	0	FALSE	6.862	9	2	2	2	1	477	52.9	6.62	2.48	2	cell organization and biogenesis;metabolic process	mitochondrion;organelle lumen	catalytic activity;protein binding	Pf08704	55006	ENSG00000171103.10	TRMT61B	2			0	100	100	1.979	3.325	100	6.64	6.64	0.98	1.73	6.64	4.12715e-16	3.81902e-16	0.417938	0.0690457	3.35161e-16			0	0
FALSE	High	Master Protein	P61204	ADP-ribosylation factor 3 OS=Homo sapiens OX=9606 GN=ARF3 PE=1 SV=2	0	FALSE	134.295	79	13	194	1	1	181	20.6	7.43	685.32	13	metabolic process;regulation of biological process;response to stimulus;transport	cytoplasm;Golgi;membrane	catalytic activity;nucleotide binding;protein binding;signal transducer activity	Pf00025, Pf00071, Pf00503, Pf01926, Pf04670, Pf08477, Pf09439	377	ENSG00000134287.9	ARF3	12	Endocytosis		0	1.297	0.436	1.306	3.186	2.377	0.38	-1.2	0.39	1.67	1.25	0.436846	0.174226	0.789293	2.99061e-05	0.00962574	57.98	7.08	72.06	78.91	76.01	98.8
FALSE	Low	Master Protein	A4D1S5	Ras-related protein Rab-19 OS=Homo sapiens OX=9606 GN=RAB19 PE=2 SV=2	0.081	FALSE	1.542	14	1	1	1	1	217	24.4	6.52	0	1	regulation of biological process;response to stimulus	endosome;Golgi;membrane	catalytic activity;nucleotide binding	Pf00025, Pf00071, Pf08477	401409	ENSG00000146955.10	RAB19	7			0	0.342	0.161	1.479	3.143	0.505	-1.55	-2.64	0.56	1.65	-0.99	0.0182726	0.000551365	0.845015	0.159608	0.455546	0	0	42.9	42.9	10.94	199.3
FALSE	High	Master Protein	Q9UKB1	F-box/WD repeat-containing protein 11 OS=Homo sapiens OX=9606 GN=FBXW11 PE=1 SV=1	0	FALSE	7.086	5	1	5	1	1	542	62.1	7.12	13.52	1	metabolic process;regulation of biological process;response to stimulus	cytoplasm;cytosol;nucleus	catalytic activity;protein binding	Pf00400, Pf00646, Pf08801, Pf12125, Pf12937	23291	ENSG00000072803.17	FBXW11	5	Ubiquitin mediated proteolysis; Hippo signaling pathway; Wnt signaling pathway; Oocyte meiosis; Hedgehog signaling pathway; Circadian rhythm; Shigellosis	TNF alpha Signaling Pathway; VEGFA-VEGFR2 Signaling Pathway	0	0.425	0.375	1.533	3.117	0.593	-1.23	-1.41	0.62	1.64	-0.75	0.023986	0.264314	0.828219	0.0513044	0.643655	21.31	11.24	76.01	76.01	44.16	120.9
FALSE	High	Master Protein	Q9ULX3	RNA-binding protein NOB1 OS=Homo sapiens OX=9606 GN=NOB1 PE=1 SV=1	0	FALSE	36.226	30	7	23	7	1	412	46.6	7.18	64.23	7	metabolic process	cytosol;nucleus	catalytic activity;metal ion binding	Pf08772, Pf15017	28987	ENSG00000141101.12	NOB1	16	Ribosome biogenesis in eukaryotes		0	1.032	0.436	0.807	3.045	0.784	0.05	-1.2	-0.31	1.61	-0.35	0.919968	0.0135964	0.588276	5.06054e-11	0.725615	53.78	17.66	44.25	132.79	48.98	123.4
FALSE	High	Master Protein	Q330K2	NADH dehydrogenase (ubiquinone) complex I, assembly factor 6 OS=Homo sapiens OX=9606 GN=NDUFAF6 PE=1 SV=2	0.002	FALSE	4.995	4	1	2	1	1	333	38.2	9.36	3.24	1	cell organization and biogenesis;metabolic process	cytoplasm;membrane;mitochondrion;nucleus	catalytic activity	Pf00494	137682	ENSG00000156170.12	NDUFAF6	8			0	0.518	0.516	2.95	3.031	1.565	-0.95	-0.95	1.56	1.6	0.65	0.106741	0.638002	0.0573006	0.0352848	0.839336	31.16	13.44	85.35	60.68	41.77	111.1
FALSE	Medium	None	P40123	Adenylyl cyclase-associated protein 2 OS=Homo sapiens OX=9606 GN=CAP2 PE=1 SV=1	0.016	FALSE	2.834	2	1	10	1	1	477	52.8	6.37	22.72	1	cell organization and biogenesis;regulation of biological process;response to stimulus	cytoskeleton;membrane	protein binding	Pf01213, Pf07986, Pf08603	10486	ENSG00000112186.11	CAP2	6		Aryl Hydrocarbon Receptor Pathway; Ectoderm Differentiation	0	0.97	0.704	1.555	3.019	1.927	-0.04	-0.51	0.64	1.59	0.95	0.991718	0.941119	0.818285	0.0264521	0.624279	62.25	59.3	66.2	138.34	82.37	76.9
FALSE	High	Master Protein	Q562R1	Beta-actin-like protein 2 OS=Homo sapiens OX=9606 GN=ACTBL2 PE=1 SV=2	0	FALSE	84.325	25	10	659	4	1	376	42	5.59	1428.09	10		cytoplasm;cytoskeleton	nucleotide binding;protein binding	Pf00022	345651	ENSG00000169067.3	ACTBL2	5			0	0.466	0.692	4.134	3.005	1.274	-1.1	-0.53	2.05	1.59	0.35	1.4025e-06	0.780811	2.16632e-14	1.57977e-12	0.752475	22.34	43.77	140.42	119.53	140.34	91.1
FALSE	High	Master Protein	O60232	Sjoegren syndrome/scleroderma autoantigen 1 OS=Homo sapiens OX=9606 GN=SSSCA1 PE=1 SV=1	0	FALSE	9.554	15	1	2	1	1	199	21.5	5.24	9.85	1	cell division		protein binding	Pf06677	10534	ENSG00000173465.7	SSSCA1	11			0	0.96	0.336	1.043	2.981	1.002	-0.06	-1.57	0.06	1.58	0	0.987145	0.129749	0.999922	0.00429937	0.993441	31.13	3.27	7.73	0	28.91	121.3
FALSE	Low	Master Protein	Q8IZW8	Tensin-4 OS=Homo sapiens OX=9606 GN=TNS4 PE=1 SV=3	0.149	FALSE	1.104	1	1	1	1	1	715	76.7	7.34	0	1	cell death	cytoplasm;cytoskeleton;cytosol	protein binding	Pf00017, Pf08416	84951	ENSG00000131746.12	TNS4	17			0	1.832	1.616	3.286	2.957	4.779	0.87	0.69	1.72	1.56	2.26	0.0444555	0.498691	0.00139242	0.00452355	5.44258e-05	55.63	52.91	53.58	42.27	70.1	45.2
FALSE	Low	Master Protein	O94864	STAGA complex 65 subunit gamma OS=Homo sapiens OX=9606 GN=SUPT7L PE=1 SV=1	0.153	FALSE	1.087	7	1	1	1	1	414	46.2	5.12	0	1	cell organization and biogenesis;metabolic process;regulation of biological process	nucleus	catalytic activity;protein binding	Pf07524	9913	ENSG00000119760.15	SUPT7L	2			0	3.448	1.738	1.52	2.957	4.335	1.79	0.8	0.6	1.56	2.12	0.000570344	0.477317	0.829104	0.105543	0.00552593	70.04	51.74	79.72	81.33	68.79	35.3
FALSE	Medium	Master Protein	Q6ZRQ5	Protein MMS22-like OS=Homo sapiens OX=9606 GN=MMS22L PE=1 SV=3	0.04	FALSE	2.098	1	1	1	1	1	1243	142.2	7.12	0	1	metabolic process;response to stimulus	cytosol;nucleus	protein binding	Pf14910, Pf14911	253714	ENSG00000146263.11	MMS22L	6			0	1.292	0.493	1.184	2.948	1.53	0.37	-1.02	0.24	1.56	0.61	0.839467	0.621907	0.985712	0.107668	0.843699	38.22	19.51	45.12	95.14	20.17	92.1
FALSE	High	Master Protein	Q99661	Kinesin-like protein KIF2C OS=Homo sapiens OX=9606 GN=KIF2C PE=1 SV=2	0	FALSE	25.295	12	6	12	5	1	725	81.3	7.83	26.26	6	cell division;cell organization and biogenesis;cell proliferation;cellular component movement;regulation of biological process;transport	chromosome;cytoplasm;cytoskeleton;cytosol;membrane;nucleus	catalytic activity;DNA binding;motor activity;nucleotide binding;protein binding	Pf00225	11004	ENSG00000142945.12	KIF2C	1		Regulation of Microtubule Cytoskeleton	0	0.842	0.274	0.726	2.94	0.668	-0.25	-1.87	-0.46	1.56	-0.58	0.782206	0.00350553	0.575666	0.00465726	0.516108	29.8	4.25	17.43	25.32	13.24	166.3
FALSE	Low	Master Protein	Q9ULR5	Polyadenylate-binding protein-interacting protein 2B OS=Homo sapiens OX=9606 GN=PAIP2B PE=1 SV=2	0.17	FALSE	1.02	24	1	3	1	1	123	14.2	4.17	0	1	regulation of biological process	cytoplasm	protein binding;translation regulator activity	Pf07145	400961	ENSG00000124374.8	PAIP2B	2			0	0.776	0.784	2.957	2.928	2.294	-0.37	-0.35	1.56	1.55	1.2	0.844125	0.973826	0.03442	0.00951696	0.276913	23.58	7	42.3	0	11.4	82.4
FALSE	High	Master Protein	Q9NXJ5	Pyroglutamyl-peptidase 1 OS=Homo sapiens OX=9606 GN=PGPEP1 PE=1 SV=1	0	FALSE	15.308	8	1	11	1	1	209	23.1	5.9	39.46	1	metabolic process	cytoplasm;cytosol	catalytic activity	Pf01470	54858	ENSG00000130517.13	PGPEP1	19			0	0.384	0.26	1.635	2.916	0.902	-1.38	-1.94	0.71	1.54	-0.15	2.37027e-06	0.000424747	0.615411	0.00776546	0.942913	18.59	7.9	108.62	86.77	62.9	211.4
FALSE	High	Master Protein	O75911	Short-chain dehydrogenase/reductase 3 OS=Homo sapiens OX=9606 GN=DHRS3 PE=1 SV=2	0	FALSE	11.003	11	2	2	2	1	302	33.5	8.84	8.1	2	metabolic process;regulation of biological process	membrane	catalytic activity;nucleotide binding	Pf00106, Pf01370, Pf02719, Pf08659, Pf13561	9249	ENSG00000162496.8	DHRS3	1	Retinol metabolism; Metabolic pathways	Vitamin A and Carotenoid Metabolism	0	100	100	2.615	2.898	100	6.64	6.64	1.39	1.53	6.64	4.12715e-16	3.81902e-16	0.0198612	0.00532369	3.35161e-16			0	214.41
FALSE	High	Master Protein	Q9BRY0	Zinc transporter ZIP3 OS=Homo sapiens OX=9606 GN=SLC39A3 PE=1 SV=2	0.007	FALSE	3.545	7	1	2	1	1	314	33.6	6.87	2.93	1	cell organization and biogenesis;transport	membrane	transporter activity	Pf02535	29985	ENSG00000141873.10	SLC39A3	19		NRF2 pathway; Senescence and Autophagy in Cancer; Zinc homeostasis	0	1.112	1.092	1.554	2.87	3.133	0.15	0.13	0.64	1.52	1.65	0.942698	0.95872	0.807755	0.124195	0.0658858	163.19	68.69	83.8	46.94	38.78	63.1
FALSE	High	Master Protein	P36873	Serine/threonine-protein phosphatase PP1-gamma catalytic subunit OS=Homo sapiens OX=9606 GN=PPP1CC PE=1 SV=1	0	FALSE	137.686	60	16	137	2	1	323	37	6.54	554.23	16	cell differentiation;cell division;cell organization and biogenesis;metabolic process;regulation of biological process;response to stimulus	chromosome;cytoplasm;cytosol;membrane;mitochondrion;nucleus	catalytic activity;metal ion binding;protein binding;RNA binding	Pf00149	5501	ENSG00000186298.11	PPP1CC	12	Dopaminergic synapse; Vascular smooth muscle contraction; Insulin signaling pathway; Amphetamine addiction; cGMP-PKG signaling pathway; Hippo signaling pathway; Oxytocin signaling pathway; Long-term potentiation; Adrenergic signaling in cardiomyocytes; Focal adhesion; Proteoglycans in cancer; Regulation of actin cytoskeleton; mRNA surveillance pathway; Oocyte meiosis; Herpes simplex infection; In…	Common Pathways Underlying Drug Addiction	0	0.878	0.21	0.736	2.853	0.51	-0.19	-2.25	-0.44	1.51	-0.97	0.89813	0.000913226	0.824216	0.0690976	0.289926	177.59	10.13	31.07	83.83	37.49	124
FALSE	High	Master Protein	Q9Y6K9	NF-kappa-B essential modulator OS=Homo sapiens OX=9606 GN=IKBKG PE=1 SV=2	0	FALSE	24.478	17	5	6	5	1	419	48.2	5.71	18.97	5	cell death;cellular component movement;defense response;metabolic process;regulation of biological process;response to stimulus	cytoplasm;cytosol;nucleus	metal ion binding;protein binding;signal transducer activity	Pf04111, Pf11577, Pf12128, Pf13851, Pf14362	8517	ENSG00000269335.5	IKBKG	X	Viral carcinogenesis; Chagas disease (American trypanosomiasis); Th1 and Th2 cell differentiation; Primary immunodeficiency; T cell receptor signaling pathway; TNF signaling pathway; NOD-like receptor signaling pathway; Osteoclast differentiation; Hepatitis B; Pancreatic cancer; Chronic myeloid leukemia; Antifolate resistance; Epstein-Barr virus infection; B cell receptor signaling pathway; Acute…	NLR Proteins; T-Cell antigen Receptor (TCR) pathway during Staphylococcus aureus infection; TNF alpha Signaling Pathway; MAPK and NFkB Signalling Pathways Inhibited by Yersinia YopJ; Toll-like receptor signaling pathway; Nucleotide-binding Oligomerization Domain (NOD) pathway; B Cell Receptor Signaling Pathway; Cardiac Hypertrophic Response; IL17 signaling pathway; RANKL/RANK (Receptor activator …	0	1.685	0.517	0.792	2.844	1.052	0.75	-0.95	-0.34	1.51	0.07	0.0045432	0.357285	0.694453	4.49315e-05	0.986445	54.01	31.98	44.55	91.4	55.55	103.4
FALSE	High	Master Protein	Q13614	Myotubularin-related protein 2 OS=Homo sapiens OX=9606 GN=MTMR2 PE=1 SV=4	0.004	FALSE	4.071	2	2	2	2	1	643	73.3	7.4	2.12	2	cell organization and biogenesis;metabolic process;regulation of biological process	cytoplasm;cytosol;endosome;membrane;nucleus	catalytic activity;protein binding	Pf02893, Pf06602	8898	ENSG00000087053.18	MTMR2	11	Phosphatidylinositol signaling system; Inositol phosphate metabolism; Metabolic pathways		0	1.17	0.51	1.238	2.839	1.449	0.23	-0.97	0.31	1.51	0.53	0.922665	0.63987	0.979658	0.119476	0.882144	78.53	12.21	53.67	42.34	57.79	96.9
FALSE	High	Master Protein	Q86WA8	Lon protease homolog 2, peroxisomal OS=Homo sapiens OX=9606 GN=LONP2 PE=1 SV=1	0	FALSE	7.079	4	2	2	2	1	852	94.6	7.3	3.15	2	cell organization and biogenesis;metabolic process;regulation of biological process;response to stimulus;transport	cytoplasm;membrane;nucleus;organelle lumen	catalytic activity;nucleotide binding;protein binding	Pf00004, Pf01202, Pf02190, Pf05362, Pf07726, Pf07728, Pf13191, Pf13541	83752	ENSG00000102910.13	LONP2	16			0		100	100	2.828	100		6.64	6.64	1.5	6.64		3.81902e-16	3.26911e-16	0.021751	3.35161e-16				140.96
FALSE	High	Master Protein	O95229	ZW10 interactor OS=Homo sapiens OX=9606 GN=ZWINT PE=1 SV=2	0.001	FALSE	5.234	8	1	2	1	1	277	31.3	5.15	2.91	1	cell division;cell organization and biogenesis;regulation of biological process	chromosome;cytoplasm;cytosol;nucleus	protein binding	Pf09731, Pf12128, Pf15556	11130	ENSG00000122952.16	ZWINT	10			0	0.74	0.551	2.084	2.802	1.543	-0.43	-0.86	1.06	1.49	0.63	0.724893	0.742423	0.301283	0.0350379	0.839335	19.77	9.89	142.11	128.47	111.66	104.3
FALSE	Low	Master Protein	Q7Z494	Nephrocystin-3 OS=Homo sapiens OX=9606 GN=NPHP3 PE=1 SV=1	0.153	FALSE	1.085	1	1	1	1	1	1330	150.8	6.76	0	1	cell organization and biogenesis;cellular component movement;regulation of biological process;response to stimulus	cytosol	protein binding	Pf00515, Pf03938, Pf13176, Pf13374, Pf13414, Pf13424, Pf13432	27031	ENSG00000113971.19	NPHP3	3		Wnt Signaling in Kidney Disease	0	100	100	4.555	2.781	100	6.64	6.64	2.19	1.48	6.64	4.12715e-16	3.81902e-16	0.0014677	0.148888	3.35161e-16			26.87	0
FALSE	Medium	Master Protein	Q9NVK5	FGFR1 oncogene partner 2 OS=Homo sapiens OX=9606 GN=FGFR1OP2 PE=1 SV=1	0.025	FALSE	2.408	5	1	1	1	1	253	29.4	6	0	1	metabolic process;response to stimulus	cytoplasm;cytosol	catalytic activity;protein binding	Pf05769, Pf11262	26127	ENSG00000111790.13	FGFR1OP2	12			0	0.01	0.689	100	2.773	1.909	-6.64	-0.54	6.64	1.47	0.93	4.12715e-16	0.941119	3.26911e-16	0.208576	0.555712		14.44		27.87	36.71	111.2
FALSE	High	Master Protein	Q9H1P3	Oxysterol-binding protein-related protein 2 OS=Homo sapiens OX=9606 GN=OSBPL2 PE=1 SV=1	0.009	FALSE	3.349	2	1	2	1	1	480	55.2	6.35	4.22	1	metabolic process;transport	cytosol	protein binding;transporter activity	Pf01237	9885	ENSG00000130703.15	OSBPL2	20			0	1.074	1.13	2.901	2.756	3.115	0.1	0.18	1.54	1.46	1.64	0.975141	0.954313	0.027127	0.0109624	0.0395579	2.83	24.53	126.33	109.21	128.76	63.3
FALSE	High	Master Protein	Q01850	Cerebellar degeneration-related protein 2 OS=Homo sapiens OX=9606 GN=CDR2 PE=1 SV=2	0.004	FALSE	3.994	2	1	2	1	1	454	51.8	5.06	3.83	1		cytoplasm	protein binding	Pf14662	1039; 101060399	ENSG00000140743.7	CDR2; LOC101060399	16			0	0.819	0.26	0.874	2.756	0.716	-0.29	-1.95	-0.19	1.46	-0.48	0.877245	0.0266252	0.974359	0.217769	0.852747	23.2	0.46	48.17	63.1	28.92	143.1
FALSE	High	Master Protein	Q9HCJ1	Progressive ankylosis protein homolog OS=Homo sapiens OX=9606 GN=ANKH PE=1 SV=2	0	FALSE	7.231	4	1	3	1	1	492	54.2	7.88	10.38	1	regulation of biological process;response to stimulus;transport	membrane	transporter activity	Pf07260	56172	ENSG00000154122.12	ANKH	5			0	0.47	0.174	0.821	2.736	0.386	-1.09	-2.53	-0.28	1.45	-1.37	0.083654	0.00100679	0.938487	0.240076	0.152477	0.92	1.61	0.26	33.3	0.62	200.4
FALSE	High	Master Protein	P60903	Protein S100-A10 OS=Homo sapiens OX=9606 GN=S100A10 PE=1 SV=2	0.002	FALSE	5	18	1	5	1	1	97	11.2	7.37	16.63	1	cell organization and biogenesis;regulation of biological process;response to stimulus	endoplasmic reticulum;extracellular;membrane	metal ion binding;protein binding	Pf01023	6281	ENSG00000197747.8	S100A10	1		Prostaglandin Synthesis and Regulation	0	3.648	0.648	0.579	2.734	1.772	1.87	-0.63	-0.79	1.45	0.83	4.12715e-16	0.832469	0.0358358	0.00940404	0.420309	90.65	46.97	27.94	132.99	76.53	53.1
FALSE	High	Master Protein	Q9P1Y5	Calmodulin-regulated spectrin-associated protein 3 OS=Homo sapiens OX=9606 GN=CAMSAP3 PE=1 SV=2	0	FALSE	7.7	2	2	4	2	1	1249	134.7	8.35	9.59	2	cell differentiation;cell organization and biogenesis;regulation of biological process	cytoplasm;cytoskeleton	protein binding	Pf00307, Pf08683, Pf11971	57662	ENSG00000076826.9	CAMSAP3	19			0	0.913	0.413	1.662	2.725	1.341	-0.13	-1.27	0.73	1.45	0.42	0.971043	0.366538	0.728484	0.069289	0.93056	52.1	13.75	40.15	93.29	77.34	94
FALSE	High	Master Protein	P46934	E3 ubiquitin-protein ligase NEDD4 OS=Homo sapiens OX=9606 GN=NEDD4 PE=1 SV=4	0	FALSE	23.9	5	4	9	1	1	1319	149	6.58	28.29	4	cell organization and biogenesis;metabolic process;regulation of biological process;response to stimulus;transport	chromosome;cytoplasm;cytosol;Golgi;membrane	catalytic activity;protein binding	Pf00397, Pf00632	4734	ENSG00000069869.15	NEDD4	15	Endocytosis; Ubiquitin mediated proteolysis; Epstein-Barr virus infection	EGF/EGFR Signaling Pathway; Proteasome Degradation	0	2.696	1.164	1.167	2.704	3.147	1.43	0.22	0.22	1.44	1.65	0.000107735	0.950768	0.985712	0.0164963	0.0608325	70.68	97.23	78.89	28.45	117.67	50
FALSE	High	Master Protein	O00189	AP-4 complex subunit mu-1 OS=Homo sapiens OX=9606 GN=AP4M1 PE=1 SV=2	0.003	FALSE	4.154	3	1	4	1	1	453	49.9	7.2	7.78	1	cell organization and biogenesis;transport	cytosol;endosome;Golgi;membrane;organelle lumen	protein binding	Pf00928	9179	ENSG00000221838.9	AP4M1	7	Lysosome		0	0.896	0.332	1.113	2.701	0.895	-0.16	-1.59	0.15	1.43	-0.16	0.934189	0.135834	0.992151	0.178458	0.961085	23.02	4.3	33.58	53.21	30.77	133.4
FALSE	Medium	None	Q9BVR0	Putative HERC2-like protein 3 OS=Homo sapiens OX=9606 GN=HERC2P3 PE=5 SV=2	0.016	FALSE	2.801	1	1	1	1	1	1158	128.9	6.89	2.88	1	metabolic process		catalytic activity;metal ion binding	Pf06701	283755		HERC2P3	15			0	1.058	0.739	1.665	2.649	1.948	0.08	-0.44	0.74	1.41	0.96	0.979532	0.915351	0.567821	0.0164731	0.31606	9.84	12.83	43.65	48.56	48.8	84.3
FALSE	High	Master Protein	A6NKF1	SAC3 domain-containing protein 1 OS=Homo sapiens OX=9606 GN=SAC3D1 PE=1 SV=2	0.001	FALSE	6.424	5	1	1	1	1	404	43.5	8.69	3.32	1	cell division	cytoplasm;cytoskeleton	protein binding	Pf03399	29901		SAC3D1	11			0	1.024	0.395	1.017	2.637	1.042	0.03	-1.34	0.02	1.4	0.06	0.98899	0.333199	0.999922	0.208085	0.999969	15.29	0.3	15.49	0	1.94	115.6
FALSE	High	Master Protein	Q8N442	Translation factor GUF1, mitochondrial OS=Homo sapiens OX=9606 GN=GUF1 PE=1 SV=1	0	FALSE	11.866	7	3	4	3	1	669	74.3	8.59	8.56	3	metabolic process;regulation of biological process;response to stimulus	membrane;mitochondrion;organelle lumen	catalytic activity;nucleotide binding	Pf00009, Pf00071, Pf00679, Pf03144, Pf06421, Pf14492	60558	ENSG00000151806.13	GUF1	4			0	1.001	0.336	0.88	2.625	0.881	0	-1.58	-0.18	1.39	-0.18	0.989941	0.280879	0.968301	0.38003	0.967285	0	2.41	11.52	19.37	11.54	122.4
FALSE	High	Master Protein	Q13356	RING-type E3 ubiquitin-protein ligase PPIL2 OS=Homo sapiens OX=9606 GN=PPIL2 PE=1 SV=1	0	FALSE	9.951	6	2	6	2	1	520	58.8	8.78	12.26	2	cell organization and biogenesis;cellular component movement;metabolic process	cytoplasm;membrane;nucleus;organelle lumen	catalytic activity;protein binding	Pf00160, Pf04641	23759	ENSG00000100023.18	PPIL2	22	Ubiquitin mediated proteolysis		0	0.829	1.01	1.931	2.62	2.662	-0.27	0.01	0.95	1.39	1.41	0.884484	0.999876	0.304319	0.0234393	0.0947706	47.01	44.31	56.53	43.14	38.09	62.5
FALSE	High	Master Protein	Q9Y2G8	DnaJ homolog subfamily C member 16 OS=Homo sapiens OX=9606 GN=DNAJC16 PE=2 SV=3	0.003	FALSE	4.211	2	2	3	2	1	782	90.5	7.12	1.61	2	cellular homeostasis;regulation of biological process	cytosol;membrane		Pf00085, Pf00226	23341	ENSG00000116138.12	DNAJC16	1			0	0.943	0.336	0.953	2.614	0.878	-0.09	-1.57	-0.07	1.39	-0.19	0.990085	0.163038	0.988797	0.296261	0.964472	28.82	3.22	85.11	128.94	83.21	125.8
FALSE	High	Master Protein	Q13206	Probable ATP-dependent RNA helicase DDX10 OS=Homo sapiens OX=9606 GN=DDX10 PE=1 SV=2	0.002	FALSE	5.021	1	1	1	1	1	875	100.8	8.63	2.96	1	metabolic process	cytoplasm	catalytic activity;nucleotide binding;RNA binding	Pf00270, Pf00271, Pf13959	1662	ENSG00000178105.9	DDX10	11			0	0.991	0.416	1.231	2.604	1.066	-0.01	-1.27	0.3	1.38	0.09	0.99136	0.371529	0.979704	0.214514	0.999125	45.43	9.01	22.08	4.57	49.81	118.4
FALSE	Medium	None	Q86W25	NACHT, LRR and PYD domains-containing protein 13 OS=Homo sapiens OX=9606 GN=NLRP13 PE=2 SV=2	0.029	FALSE	2.295	1	1	18	0	3	1043	118.8	5.66	16.76	1			nucleotide binding;protein binding	Pf02758, Pf05729, Pf13207, Pf13481	126204	ENSG00000173572.11	NLRP13	19			0	0.839	0.409	1.046	2.604	0.777	-0.25	-1.29	0.06	1.38	-0.36	0.823534	0.155203	0.999922	0.061757	0.879504	26.52	10.95	20.31	57.17	38.18	113.5
FALSE	High	Master Protein	Q6PCT2	F-box/LRR-repeat protein 19 OS=Homo sapiens OX=9606 GN=FBXL19 PE=1 SV=3	0.003	FALSE	4.205	2	1	2	1	1	694	75.7	9.17	4.46	1	metabolic process	cytosol	catalytic activity;DNA binding;metal ion binding;protein binding	Pf00646, Pf02008, Pf12937	54620	ENSG00000099364.16	FBXL19	16			0	1.237	0.946	2.166	2.554	2.608	0.31	-0.08	1.11	1.35	1.38	0.87977	0.999876	0.345315	0.125442	0.231115	55.41	41.5	50.77	52.83	55.37	76.5
FALSE	Low	Master Protein	Q96QT4	Transient receptor potential cation channel subfamily M member 7 OS=Homo sapiens OX=9606 GN=TRPM7 PE=1 SV=1	0.175	FALSE	1.003	1	1	1	1	1	1865	212.6	7.88	0	1	cell death;cell organization and biogenesis;cellular homeostasis;metabolic process;transport	membrane	catalytic activity;metal ion binding;nucleotide binding;protein binding;transporter activity	Pf00520, Pf02816	54822	ENSG00000092439.13	TRPM7	15	NOD-like receptor signaling pathway; Mineral absorption		0	0.718	0.65	2.313	2.553	1.66	-0.48	-0.62	1.21	1.35	0.73	0.678889	0.878712	0.250225	0.0988342	0.79596	4.41	17.25	153.98	115.51	145.34	99.3
FALSE	High	None	Q6NXS1	Protein phosphatase inhibitor 2 family member B OS=Homo sapiens OX=9606 GN=PPP1R2B PE=1 SV=2	0	FALSE	7.352	7	1	4	1	1	205	23.1	4.87	7.92	1											0	0.592	0.253	0.862	2.543	0.643	-0.76	-1.98	-0.21	1.35	-0.64	0.505452	0.030602	0.966221	0.424788	0.786869	27.1	6.86	45.67	116.64	22.85	165.1
FALSE	High	Master Protein	O14920	Inhibitor of nuclear factor kappa-B kinase subunit beta OS=Homo sapiens OX=9606 GN=IKBKB PE=1 SV=1	0	FALSE	9.003	4	2	3	2	1	756	86.5	5.78	3.04	2	cell organization and biogenesis;defense response;metabolic process;regulation of biological process;response to stimulus	cytoplasm;cytosol;membrane;nucleus	catalytic activity;nucleotide binding;protein binding	Pf00069, Pf00240, Pf07714, Pf12179	3551	ENSG00000104365.13	IKBKB	8	Chagas disease (American trypanosomiasis); Th1 and Th2 cell differentiation; T cell receptor signaling pathway; TNF signaling pathway; NOD-like receptor signaling pathway; Osteoclast differentiation; Hepatitis B; Insulin signaling pathway; Pancreatic cancer; FoxO signaling pathway; MicroRNAs in cancer; Chronic myeloid leukemia; Antifolate resistance; Epstein-Barr virus infection; Neurotrophin sig…	IL17 signaling pathway; B Cell Receptor Signaling Pathway; RIG-I-like Receptor Signaling; Leptin signaling pathway; Toll-like Receptor Signaling; MicroRNAs in cardiomyocyte hypertrophy; Rac1/Pak1/p38/MMP-2 pathway; Osteopontin Signaling; Quercetin and Nf-kB/ AP-1 Induced Cell Apoptosis; Insulin Signaling; Nucleotide-binding Oligomerization Domain (NOD) pathway; MAPK Signaling Pathway; Photodynami…	0	0.644	0.433	1.694	2.53	1.127	-0.63	-1.21	0.76	1.34	0.17	0.621138	0.544692	0.709937	0.311664	0.974738	10.58	14.64	31.45	84.79	32.71	55.4
FALSE	High	Master Protein	Q969T4	Ubiquitin-conjugating enzyme E2 E3 OS=Homo sapiens OX=9606 GN=UBE2E3 PE=1 SV=1	0	FALSE	16.058	23	2	18	1	1	207	22.9	7.18	36.08	2	metabolic process;regulation of biological process	cytoplasm;cytosol;nucleus	catalytic activity;nucleotide binding;protein binding	Pf00179	10477	ENSG00000170035.15	UBE2E3	2	Ubiquitin mediated proteolysis		0	0.993	0.826	1.735	2.523	1.722	-0.01	-0.28	0.79	1.34	0.78	0.999944	0.999876	0.633987	0.118219	0.771054	38.34	8.11	136.22	169.89	139.43	78
FALSE	Medium	Master Protein	Q5TGZ0	MICOS complex subunit MIC10 OS=Homo sapiens OX=9606 GN=MINOS1 PE=1 SV=1	0.022	FALSE	2.576	10	1	1	1	1	78	8.8	8.5	0	1		membrane;mitochondrion	protein binding	Pf04418	440574	ENSG00000173436.13	MINOS1	1			0	0.811	0.521	0.89	2.522	0.774	-0.3	-0.94	-0.17	1.33	-0.37	0.853978	0.616918	0.984781	0.141388	0.886139	14.83	25.21	74.31	112.51	62.43	127.3
FALSE	High	Master Protein	Q5VTE6	Protein angel homolog 2 OS=Homo sapiens OX=9606 GN=ANGEL2 PE=2 SV=1	0.001	FALSE	5.591	4	1	1	1	1	544	62.3	7.81	3.25	1	regulation of biological process	cytoplasm	RNA binding	Pf03372	90806	ENSG00000174606.13	ANGEL2	1			0	0.761	0.446	1.493	2.515	1.32	-0.39	-1.17	0.58	1.33	0.4	0.764407	0.456834	0.828409	0.118172	0.934089	6.67	1.54	27.22	28.35	31.31	120.6
FALSE	High	Master Protein	Q92667	A-kinase anchor protein 1, mitochondrial OS=Homo sapiens OX=9606 GN=AKAP1 PE=1 SV=1	0	FALSE	11.967	4	3	11	3	1	903	97.3	4.94	15.3	3	coagulation;regulation of biological process	cytosol;membrane;mitochondrion	protein binding;RNA binding	Pf00013, Pf00567, Pf12072, Pf13014	8165	ENSG00000121057.12	AKAP1	17		G Protein Signaling Pathways	0	1.305	0.361	0.623	2.514	0.878	0.38	-1.47	-0.68	1.33	-0.19	0.771457	0.206864	0.656263	0.188908	0.944123	44.28	8.98	11.64	78.69	34.75	117.5
FALSE	High	Master Protein	A6NHL2	Tubulin alpha chain-like 3 OS=Homo sapiens OX=9606 GN=TUBAL3 PE=1 SV=2	0	FALSE	34.02	9	5	211	1	1	446	49.9	6.05	404.52	5	cell organization and biogenesis	cytoplasm;cytoskeleton	catalytic activity;nucleotide binding;structural molecule activity	Pf00091, Pf03953	79861	ENSG00000178462.11	TUBAL3	10	Pathogenic Escherichia coli infection; Gap junction; Phagosome; Apoptosis	Parkin-Ubiquitin Proteasomal System pathway; Pathogenic Escherichia coli infection	0	1.016	0.485	1.195	2.504	1.214	0.02	-1.04	0.26	1.32	0.28	0.979547	0.334537	0.948365	0.013344	0.925543	0	26.8	0	113.9	0	107.7
FALSE	Low	Master Protein	Q9HCJ0	Trinucleotide repeat-containing gene 6C protein OS=Homo sapiens OX=9606 GN=TNRC6C PE=1 SV=3	0.103	FALSE	1.349	1	1	2	1	1	1690	175.9	6.96	3.53	1	regulation of biological process;response to stimulus	cytosol	protein binding;RNA binding	Pf00076, Pf00627, Pf10427, Pf12938, Pf13893, Pf14259	57690	ENSG00000078687.17	TNRC6C	17		Endoderm Differentiation	0	0.893	0.676	1.334	2.493	2.106	-0.16	-0.56	0.42	1.32	1.07	0.97262	0.941119	0.950677	0.303635	0.411891	77.75	45.64	190.48	47.87	46.67	72.3
FALSE	Medium	None	P78332	RNA-binding protein 6 OS=Homo sapiens OX=9606 GN=RBM6 PE=1 SV=5	0.019	FALSE	2.672	1	1	8	1	1	1123	128.6	6.32	17.84	1	metabolic process	nucleus	DNA binding;protein binding;RNA binding	Pf01585, Pf14259	10180	ENSG00000004534.14	RBM6	3			0	1.396	0.665	1.055	2.481	1.473	0.48	-0.59	0.08	1.31	0.56	0.580414	0.839074	0.999922	0.051659	0.846261	45.06	44.42	61.32	87.59	49.06	83.4
FALSE	High	Master Protein	O00519	Fatty-acid amide hydrolase 1 OS=Homo sapiens OX=9606 GN=FAAH PE=1 SV=2	0	FALSE	9.998	8	2	2	2	1	579	63	7.66	5.87	2	metabolic process	cytoplasm;cytoskeleton;membrane	catalytic activity;protein binding	Pf01425	2166	ENSG00000117480.15	FAAH	1	Retrograde endocannabinoid signaling		0	1.9	0.972	1.592	2.472	1.352	0.93	-0.04	0.67	1.31	0.44	0.0929682	0.999876	0.640323	0.035506	0.925543	107.31	56.41	87.75	106.14	56.63	35.2
FALSE	High	Master Protein	P01033	Metalloproteinase inhibitor 1 OS=Homo sapiens OX=9606 GN=TIMP1 PE=1 SV=1	0	FALSE	23.562	34	5	10	5	1	207	23.2	8.1	17.27	5	cell organization and biogenesis;metabolic process;regulation of biological process;response to stimulus;transport	extracellular;organelle lumen	enzyme regulator activity;metal ion binding;protein binding	Pf00965	7076	ENSG00000102265.11	TIMP1	X	HIF-1 signaling pathway	IL-6 signaling pathway; Lung fibrosis; IL1 and megakaryocytes in obesity; Matrix Metalloproteinases	0	1.429	0.265	1.098	2.454	1.578	0.51	-1.92	0.13	1.29	0.66	0.108176	0.00285753	0.988797	0.000102158	0.376229	60.77	3.55	50.13	79.44	55.09	75.4
FALSE	High	None	Q8N7N1	Putative protein N-methyltransferase FAM86B1 OS=Homo sapiens OX=9606 GN=FAM86B1 PE=2 SV=2	0.002	FALSE	5.069	5	1	3	1	1	296	32.8	6.44	8.37	1	metabolic process		catalytic activity	Pf08242, Pf10294, Pf12847, Pf13659, Pf14904	85002	ENSG00000186523.14	FAM86B1	8			0	0.968	0.312	0.79	2.447	0.765	-0.05	-1.68	-0.34	1.29	-0.39	0.990085	0.0911124	0.91391	0.287513	0.874277	14.48	0	9.64	0	0	131.4
FALSE	High	None	Q96G04	Protein-lysine N-methyltransferase EEF2KMT OS=Homo sapiens OX=9606 GN=EEF2KMT PE=1 SV=2	0.002	FALSE	5.069	4	1	3	1	1	330	36.9	6.05	8.37	1	metabolic process	cytoplasm;cytosol	catalytic activity;protein binding	Pf08242, Pf10294, Pf13659, Pf14904	196483	ENSG00000118894.14	FAM86A; EEF2KMT	16			0	0.968	0.312	0.79	2.447	0.765	-0.05	-1.68	-0.34	1.29	-0.39	0.990085	0.0911124	0.91391	0.287513	0.874277	14.48	0	9.64	0	0	131.4
FALSE	High	Master Protein	P0C5J1	Putative protein N-methyltransferase FAM86B2 OS=Homo sapiens OX=9606 GN=FAM86B2 PE=1 SV=1	0	FALSE	6.572	6	2	6	2	1	330	36.7	6.28	10.08	2	metabolic process		catalytic activity;protein binding	Pf08242, Pf10294, Pf12847, Pf13659, Pf14904	653333	ENSG00000145002.12	FAM86B2	8			0	0.968	0.312	0.79	2.447	0.765	-0.05	-1.68	-0.34	1.29	-0.39	0.990085	0.0911124	0.91391	0.287513	0.874277	14.48	0	9.64	0	0	131.4
FALSE	Low	Master Protein	Q8WTR2	Dual specificity protein phosphatase 19 OS=Homo sapiens OX=9606 GN=DUSP19 PE=1 SV=1	0.095	FALSE	1.415	12	1	10	1	1	217	24.2	6.54	0	1	metabolic process;regulation of biological process		catalytic activity;enzyme regulator activity;protein binding;structural molecule activity	Pf00102, Pf00782	142679	ENSG00000162999.12	DUSP19	2			0	0.569	0.553	2.375	2.443	1.351	-0.81	-0.86	1.25	1.29	0.43	0.318082	0.76081	0.218842	0.264015	0.921137	20.26	19.14	0	0	62.62	115.2
FALSE	High	Master Protein	O95476	CTD nuclear envelope phosphatase 1 OS=Homo sapiens OX=9606 GN=CTDNEP1 PE=1 SV=2	0.008	FALSE	3.447	9	1	3	1	1	244	28.4	9.76	0	1	cell organization and biogenesis;metabolic process;regulation of biological process	cytoplasm;endoplasmic reticulum;membrane;nucleus	catalytic activity;protein binding	Pf03031	23399	ENSG00000175826.11	CTDNEP1	17			0	2.987	0.39	0.319	2.441	0.952	1.58	-1.36	-1.65	1.29	-0.07	0.00145956	0.467749	0.0166092	0.401081	0.987282	88.94	12.9	8	70.68	61.06	67.8
FALSE	High	Master Protein	Q5HYK3	2-methoxy-6-polyprenyl-1,4-benzoquinol methylase, mitochondrial OS=Homo sapiens OX=9606 GN=COQ5 PE=1 SV=2	0	FALSE	14.923	17	4	5	4	1	327	37.1	6.95	10.45	4	metabolic process	membrane;mitochondrion;organelle lumen	catalytic activity;protein binding	Pf01170, Pf01209, Pf08241, Pf08242, Pf12847, Pf13489, Pf13649, Pf13659, Pf13847	84274	ENSG00000110871.14	COQ5	12	Ubiquinone and other terpenoid-quinone biosynthesis; Metabolic pathways		0	1.114	1.069	1.187	2.433	1.317	0.16	0.1	0.25	1.28	0.4	0.947466	0.973826	0.987353	0.0514985	0.929578	55.1	39.92	64.2	76.32	54.8	88
FALSE	High	Master Protein	Q00978	Interferon regulatory factor 9 OS=Homo sapiens OX=9606 GN=IRF9 PE=1 SV=1	0	FALSE	8.702	8	2	7	2	1	393	43.7	5.77	14.24	2	defense response;metabolic process;regulation of biological process;response to stimulus	cytoplasm;cytosol;nucleus	DNA binding;protein binding	Pf00605, Pf10401	10379	ENSG00000213928.8	IRF9	14	Viral carcinogenesis; NOD-like receptor signaling pathway; Osteoclast differentiation; Jak-STAT signaling pathway; Measles; Herpes simplex infection; Hepatitis C; Influenza A	Type II interferon signaling (IFNG); Type III interferon signaling; Interferon type I signaling pathways	0	1.692	1.963	1.985	2.431	2.83	0.76	0.97	0.99	1.28	1.5	0.398306	0.319054	0.284771	0.0394181	0.0676759	58.37	53.54	90.89	120.91	105.13	28.8
FALSE	Medium	None	P27482	Calmodulin-like protein 3 OS=Homo sapiens OX=9606 GN=CALML3 PE=1 SV=2	0.03	FALSE	2.265	5	1	4	1	1	149	16.9	4.42	0	1			metal ion binding;protein binding	Pf00036, Pf08726, Pf13202, Pf13405, Pf13499, Pf13833	810	ENSG00000178363.4	CALML3	10	Dopaminergic synapse; Phototransduction; Vascular smooth muscle contraction; Insulin signaling pathway; Amphetamine addiction; cGMP-PKG signaling pathway; Renin secretion; Neurotrophin signaling pathway; Rap1 signaling pathway; Oxytocin signaling pathway; Olfactory transduction; Circadian entrainment; Long-term potentiation; Glioma; Phosphatidylinositol signaling system; Adrenergic signaling in c…	Alzheimers Disease	0	0.71	0.332	1.059	2.431	0.769	-0.5	-1.59	0.08	1.28	-0.38	0.654316	0.130569	0.999922	0.339708	0.893301	27.46	7.46	74.13	80.2	29.47	140.9
FALSE	Medium	None	P02585	Troponin C, skeletal muscle OS=Homo sapiens OX=9606 GN=TNNC2 PE=1 SV=2	0.03	FALSE	2.265	4	1	4	1	1	160	18.1	4.2	0	1	cellular component movement;regulation of biological process	cytosol	metal ion binding;protein binding	Pf00036, Pf13202, Pf13405, Pf13499, Pf13833	7125	ENSG00000101470.9	TNNC2	20	Calcium signaling pathway	Striated Muscle Contraction	0	0.71	0.332	1.059	2.431	0.769	-0.5	-1.59	0.08	1.28	-0.38	0.654316	0.130569	0.999922	0.339708	0.893301	27.46	7.46	74.13	80.2	29.47	140.9
FALSE	High	Master Protein	Q9UPT9	Ubiquitin carboxyl-terminal hydrolase 22 OS=Homo sapiens OX=9606 GN=USP22 PE=1 SV=2	0	FALSE	14.176	9	2	3	2	1	525	59.9	8.05	12.93	2	cell organization and biogenesis;metabolic process;regulation of biological process	nucleus	catalytic activity;metal ion binding;protein binding	Pf00443, Pf02148, Pf13423	23326	ENSG00000124422.11	USP22	17			0	0.982	0.255	0.694	2.429	0.621	-0.03	-1.97	-0.53	1.28	-0.69	0.98899	0.0247963	0.611694	0.0426048	0.638953	16.87	4.45	22.84	52.71	19.23	89.7
FALSE	High	Master Protein	Q8TF01	Arginine/serine-rich protein PNISR OS=Homo sapiens OX=9606 GN=PNISR PE=1 SV=2	0.004	FALSE	4.013	1	1	1	1	1	805	92.5	10.02	2.26	1		cytosol;nucleus	RNA binding		25957	ENSG00000132424.14	PNISR	6			0	2.066	0.923	0.835	2.427	2.363	1.05	-0.12	-0.26	1.28	1.24	0.0107821	0.999876	0.923481	0.0368353	0.218988	53.96	72.45	46.85	55.72	73.42	77.3
FALSE	High	Master Protein	Q9NRX1	RNA-binding protein PNO1 OS=Homo sapiens OX=9606 GN=PNO1 PE=1 SV=1	0	FALSE	28.799	26	4	7	4	1	252	27.9	9.73	25.64	4	metabolic process	cytosol;nucleus	RNA binding	Pf00013	56902	ENSG00000115946.7	PNO1	2			0	1.549	0.572	0.892	2.414	1.382	0.63	-0.8	-0.16	1.27	0.47	0.590876	0.822736	0.979704	0.389792	0.886024	3.98	0.28	39.03	49.67	50.23	55.4
FALSE	High	Master Protein	Q7Z4H7	HAUS augmin-like complex subunit 6 OS=Homo sapiens OX=9606 GN=HAUS6 PE=1 SV=2	0	FALSE	10.863	4	3	6	3	1	955	108.6	6.47	8.75	3	cell division;cell organization and biogenesis;regulation of biological process	cytoplasm;cytoskeleton;cytosol	protein binding	Pf14661	54801	ENSG00000147874.10	HAUS6	9			0	1.004	0.491	0.78	2.405	0.851	0.01	-1.03	-0.36	1.27	-0.23	0.98899	0.41555	0.833899	0.0450663	0.908425	38.06	14.12	26.59	43.71	42.81	141.6
FALSE	High	Master Protein	O76080	AN1-type zinc finger protein 5 OS=Homo sapiens OX=9606 GN=ZFAND5 PE=1 SV=1	0	FALSE	7.853	18	2	4	2	1	213	23.1	8.51	2.75	2	cellular component movement;regulation of biological process;response to stimulus	cytoplasm	DNA binding;metal ion binding;protein binding	Pf01428, Pf01754	7763	ENSG00000107372.12	ZFAND5	9			0	1.145	0.287	0.634	2.403	0.802	0.2	-1.8	-0.66	1.27	-0.32	0.92523	0.0570232	0.685516	0.343296	0.911137	52.49	3.06	39.81	103.48	56.92	170.9
FALSE	High	Master Protein	P82970	High mobility group nucleosome-binding domain-containing protein 5 OS=Homo sapiens OX=9606 GN=HMGN5 PE=1 SV=1	0	FALSE	9.337	14	2	3	2	1	282	31.5	4.55	8.37	2	cell organization and biogenesis;metabolic process;regulation of biological process	chromosome;nucleus	DNA binding;protein binding;RNA binding	Pf01101	79366	ENSG00000198157.10	HMGN5	X			0	0.674	0.352	1.599	2.402	1.087	-0.57	-1.51	0.68	1.26	0.12	0.116669	0.0293763	0.538796	0.0456306	0.97884	30.68	3.86	35.09	47.38	47.16	156.1
FALSE	Medium	None	Q9C010	cAMP-dependent protein kinase inhibitor beta OS=Homo sapiens OX=9606 GN=PKIB PE=3 SV=1	0.025	FALSE	2.398	9	1	2	1	1	78	8.5	4.88	1.75	1	regulation of biological process	cytoplasm;nucleus	enzyme regulator activity	Pf02827	5570	ENSG00000135549.14	PKIB	6		Myometrial Relaxation and Contraction Pathways; Calcium Regulation in the Cardiac Cell	0	1.038	0.894	1.326	2.392	1.871	0.05	-0.16	0.41	1.26	0.9	0.981907	0.999876	0.951514	0.362466	0.569659	18.35	40.16	53.28	76.51	77.96	97.8
FALSE	Medium	Master Protein	Q9H098	Protein FAM107B OS=Homo sapiens OX=9606 GN=FAM107B PE=1 SV=1	0.014	FALSE	2.928	10	1	1	1	1	131	15.5	8.29	0	1				Pf06625	83641	ENSG00000065809.13	FAM107B	10			0	1.017	0.433	1.012	2.38	1.029	0.02	-1.21	0.02	1.25	0.04	0.989905	0.411124	0.999922	0.374627	0.999271	33.3	6.75	73.26	71.91	89.62	115
FALSE	High	None	P29762	Cellular retinoic acid-binding protein 1 OS=Homo sapiens OX=9606 GN=CRABP1 PE=1 SV=2	0.01	FALSE	3.208	5	1	11	1	1	137	15.6	5.38	13.85	1	development;metabolic process;regulation of biological process;response to stimulus;transport	cytoplasm;cytosol	protein binding;transporter activity	Pf00061, Pf14651	1381	ENSG00000166426.7	CRABP1	15		Vitamin A and Carotenoid Metabolism	0	0.872	1.176	2.658	2.378	2.907	-0.2	0.23	1.41	1.25	1.54	0.931016	0.946981	0.0282219	0.0497051	0.0413162	91.25	87.9	68.33	64.72	64.99	74.5
FALSE	High	Master Protein	Q9Y2R0	Cytochrome c oxidase assembly factor 3 homolog, mitochondrial OS=Homo sapiens OX=9606 GN=COA3 PE=1 SV=1	0	FALSE	7.003	18	2	11	2	1	106	11.7	9.6	24.78	2	cell organization and biogenesis;regulation of biological process	membrane;mitochondrion	protein binding	Pf09813	28958	ENSG00000183978.7	COA3	17			0	1.237	0.951	1.16	2.355	1.79	0.31	-0.07	0.21	1.24	0.84	0.538316	0.999876	0.963796	0.000494658	0.184224	52.86	81.15	67.39	95.42	87.68	84
FALSE	High	Master Protein	Q9H0W8	Protein SMG9 OS=Homo sapiens OX=9606 GN=SMG9 PE=1 SV=1	0	FALSE	13.56	8	3	4	3	1	520	57.6	7.01	6.2	3	metabolic process	cytosol	protein binding		56006	ENSG00000105771.13	SMG9	19			0	1.54	1.104	1.262	2.336	2.325	0.62	0.14	0.34	1.22	1.22	0.190004	0.96374	0.958752	0.0491206	0.0804412	28.02	20.71	41.12	88.94	58.51	65.8
FALSE	High	Master Protein	Q9GZS1	DNA-directed RNA polymerase I subunit RPA49 OS=Homo sapiens OX=9606 GN=POLR1E PE=1 SV=3	0.01	FALSE	3.202	2	1	2	1	1	419	47.2	8.94	4.34	1											0	0.382	0.479	3.773	2.329	1.075	-1.39	-1.06	1.92	1.22	0.1	0.0164644	0.577552	0.00436133	0.394789	0.994683	17.43	13.3	122.82	33.28	51.95	141.7
FALSE	High	Master Protein	Q86WX3	Active regulator of SIRT1 OS=Homo sapiens OX=9606 GN=RPS19BP1 PE=1 SV=1	0	FALSE	11.6	25	2	7	2	1	136	15.4	10.74	18.14	2		cytosol;nucleus;ribosome	protein binding;RNA binding		91582	ENSG00000187051.8	RPS19BP1	22			0	0.731	0.545	1.137	2.328	0.785	-0.45	-0.88	0.19	1.22	-0.35	0.704171	0.738682	0.990405	0.17803	0.898384	11.17	0	21.86	0	7.94	134.3
FALSE	High	Master Protein	O43819	Protein SCO2 homolog, mitochondrial OS=Homo sapiens OX=9606 GN=SCO2 PE=1 SV=3	0	FALSE	12.173	21	3	8	3	1	266	29.8	8.85	15.58	3	cell organization and biogenesis;cellular homeostasis;metabolic process;regulation of biological process;transport	membrane;mitochondrion;organelle lumen	antioxidant activity;catalytic activity;metal ion binding;protein binding	Pf00578, Pf02630, Pf13905	9997	ENSG00000130489.14; ENSG00000284194.1	SCO2	22	Central carbon metabolism in cancer	Copper homeostasis	0	1.205	0.494	1.076	2.316	1.138	0.27	-1.02	0.11	1.21	0.19	0.806077	0.279478	0.999922	0.0627101	0.970461	82.4	23.24	84.37	84.2	43.28	111.4
FALSE	High	Master Protein	Q9NUQ2	1-acyl-sn-glycerol-3-phosphate acyltransferase epsilon OS=Homo sapiens OX=9606 GN=AGPAT5 PE=1 SV=3	0	FALSE	16.243	10	3	5	3	1	364	42	9.1	16.65	3	cell differentiation;metabolic process	endoplasmic reticulum;membrane;mitochondrion;nucleus	catalytic activity;protein binding	Pf01553	55326	ENSG00000155189.11	AGPAT5	8	Phospholipase D signaling pathway; Glycerolipid metabolism; Glycerophospholipid metabolism; Metabolic pathways	Triacylglyceride Synthesis	0	0.653	0.864	1.826	2.316	1.472	-0.61	-0.21	0.87	1.21	0.56	0.115974	0.995718	0.244995	0.00106693	0.725615	28.07	48.22	60.33	64.53	47.33	91.8
FALSE	High	Master Protein	O95848	Uridine diphosphate glucose pyrophosphatase OS=Homo sapiens OX=9606 GN=NUDT14 PE=1 SV=2	0.001	FALSE	5.652	6	1	1	1	1	222	24.1	5.05	2.48	1	metabolic process	cytoplasm;cytosol	catalytic activity;metal ion binding;protein binding	Pf00293	256281	ENSG00000183828.14	NUDT14	14			0	0.999	1.038	2.37	2.315	2.367	0	0.05	1.24	1.21	1.24	0.997199	0.980861	0.186697	0.155438	0.293023	2.4	6.12	142.35	136.81	144.67	74
FALSE	High	Master Protein	P54652	Heat shock-related 70 kDa protein 2 OS=Homo sapiens OX=9606 GN=HSPA2 PE=1 SV=1	0	FALSE	107.49	21	13	291	2	1	639	70	5.74	914.65	13	cell differentiation;cell organization and biogenesis;metabolic process;regulation of biological process;response to stimulus	cell surface;cytoplasm;cytoskeleton;cytosol;membrane;mitochondrion;nucleus	nucleotide binding;protein binding	Pf00012, Pf06723	3306	ENSG00000126803.9	HSPA2	14	Endocytosis; Longevity regulating pathway - multiple species; Epstein-Barr virus infection; Spliceosome; MAPK signaling pathway; Protein processing in endoplasmic reticulum; Toxoplasmosis; Measles; Influenza A; Estrogen signaling pathway; Legionellosis; Antigen processing and presentation	Parkin-Ubiquitin Proteasomal System pathway	0	0.01	0.428	100	2.308	0.988	-6.64	-1.22	6.64	1.21	-0.02	4.12715e-16	0.402991	3.26911e-16	0.202063	0.985678		0		47.11	46	165.5
FALSE	High	Master Protein	O75347	Tubulin-specific chaperone A OS=Homo sapiens OX=9606 GN=TBCA PE=1 SV=3	0	FALSE	65.416	56	10	73	10	1	108	12.8	5.29	225.55	10	cell organization and biogenesis;metabolic process	cytoplasm;cytoskeleton	protein binding;RNA binding	Pf02970	6902	ENSG00000171530.13	TBCA	5			0	0.708	0.348	0.919	2.299	0.648	-0.5	-1.52	-0.12	1.2	-0.63	0.000950018	9.81058e-05	0.920908	1.57717e-07	0.0963219	34.41	11.65	56.39	101.48	33.71	206.7
FALSE	High	Master Protein	Q9UPN4	Centrosomal protein of 131 kDa OS=Homo sapiens OX=9606 GN=CEP131 PE=1 SV=3	0	FALSE	21.93	7	5	8	5	1	1083	122.1	8.69	7.69	5	cell differentiation;cell organization and biogenesis;cellular component movement;development;metabolic process;regulation of biological process;transport	cytoplasm;cytoskeleton;cytosol	catalytic activity;motor activity;protein binding	Pf01576, Pf02463, Pf04111, Pf04156, Pf09726, Pf12128	22994	ENSG00000141577.13	AZI1; CEP131	17			0	0.843	0.469	1.303	2.295	0.934	-0.25	-1.09	0.38	1.2	-0.1	0.836868	0.212313	0.930576	0.067457	0.965371	40.35	16.42	27.5	70.77	45.8	145
FALSE	High	Master Protein	P19823	Inter-alpha-trypsin inhibitor heavy chain H2 OS=Homo sapiens OX=9606 GN=ITIH2 PE=1 SV=2	0.001	FALSE	6.399	2	1	7	1	1	946	106.4	6.86	14.22	1	metabolic process;regulation of biological process	extracellular;organelle lumen	enzyme regulator activity	Pf00092, Pf06668, Pf08487, Pf13519, Pf13768	3698	ENSG00000151655.18	ITIH2	10			0	1.9	0.981	1.322	2.287	1.734	0.93	-0.03	0.4	1.19	0.79	0.179366	0.993555	0.948669	0.371512	0.699161	62.84	88.64	72.67	118.04	84.85	61.7
FALSE	High	Master Protein	Q14689	Disco-interacting protein 2 homolog A OS=Homo sapiens OX=9606 GN=DIP2A PE=1 SV=2	0.003	FALSE	4.114	2	2	5	1	1	1571	170.3	8.03	6.67	2	development;metabolic process;regulation of biological process	cell surface;nucleus	catalytic activity;protein binding	Pf00501, Pf06464	23181	ENSG00000160305.17	DIP2A	21		Mesodermal Commitment Pathway	0	1.328	0.405	0.679	2.268	0.901	0.41	-1.31	-0.56	1.18	-0.15	0.803258	0.336092	0.755417	0.461217	0.969017	67.64	20.3	43.34	93.93	17.59	127
FALSE	Low	None	Q9Y2E4	Disco-interacting protein 2 homolog C OS=Homo sapiens OX=9606 GN=DIP2C PE=1 SV=2	0.128	FALSE	1.191	1	1	4	1	1	1556	170.7	7.39	3.99	1	metabolic process		catalytic activity	Pf00501, Pf06464	22982	ENSG00000151240.16	DIP2C	10			0	1.328	0.405	0.679	2.268	0.901	0.41	-1.31	-0.56	1.18	-0.15	0.803258	0.336092	0.755417	0.461217	0.969017	67.64	20.3	43.34	93.93	17.59	127
FALSE	High	Master Protein	Q969L2	Protein MAL2 OS=Homo sapiens OX=9606 GN=MAL2 PE=1 SV=1	0.003	FALSE	4.162	6	1	6	1	1	176	19.1	6.24	14.14	1	cell organization and biogenesis;transport	cytoplasm;membrane	protein binding;structural molecule activity	Pf01284	114569	ENSG00000147676.13	MAL2	8			0	0.856	0.988	1.672	2.265	1.431	-0.22	-0.02	0.74	1.18	0.52	0.866434	0.999876	0.362727	0.0149806	0.722976	13.19	9.67	20.49	53.42	14.94	93.6
FALSE	High	Master Protein	Q9Y251	Heparanase OS=Homo sapiens OX=9606 GN=HPSE PE=1 SV=2	0.001	FALSE	5.937	3	1	1	1	1	543	61.1	9.28	3.94	1	metabolic process;regulation of biological process;response to stimulus;transport	extracellular;membrane;nucleus;organelle lumen;vacuole	catalytic activity;protein binding	Pf03662	10855	ENSG00000173083.14	HPSE	4	Glycosaminoglycan degradation; Proteoglycans in cancer; Metabolic pathways		0	2.503	3.166	2.861	2.262	7.16	1.32	1.66	1.52	1.18	2.84	0.025337	0.0237439	0.0441607	0.310968	4.76347e-05	0	146.13	31.15	118.62	31.15	28.9
FALSE	High	Master Protein	Q7Z569	BRCA1-associated protein OS=Homo sapiens OX=9606 GN=BRAP PE=1 SV=2	0.001	FALSE	6.246	4	2	2	2	1	592	67.3	5.92	2.24	2	metabolic process;regulation of biological process;response to stimulus	cytoplasm;cytosol;membrane	catalytic activity;metal ion binding;nucleotide binding;protein binding	Pf00097, Pf02148, Pf02841, Pf07576, Pf12128, Pf12678, Pf12718, Pf12861, Pf13639, Pf13923, Pf14634	8315	ENSG00000089234.15	BRAP	12	Ras signaling pathway		0		100	100	2.26	100		6.64	6.64	1.18	6.64		3.81902e-16	3.26911e-16	0.17987	3.35161e-16				57.92
FALSE	High	Master Protein	Q96PV7	Protein FAM193B OS=Homo sapiens OX=9606 GN=FAM193B PE=1 SV=3	0	FALSE	7.082	2	1	3	1	1	902	96.5	7.9	8.48	1		cytoplasm;nucleus	protein binding		54540		FAM193B	5			0	1.508	0.685	1.04	2.257	1.112	0.59	-0.55	0.06	1.17	0.15	0.580118	0.941119	0.999922	0.431537	0.984792	92.79	34.76	123.66	120.83	125.42	94.8
FALSE	High	Master Protein	Q9UHN6	Cell surface hyaluronidase OS=Homo sapiens OX=9606 GN=CEMIP2 PE=1 SV=1	0	FALSE	6.739	2	1	1	1	1	1383	154.3	8.15	2.98	1	development;metabolic process	membrane	catalytic activity;metal ion binding;protein binding	Pf10162	23670	ENSG00000135048.13	TMEM2	9			0	1.745	0.355	0.459	2.256	0.801	0.8	-1.49	-1.12	1.17	-0.32	0.288161	0.191978	0.218842	0.399236	0.921137	79.94	15.14	13.08	0	77.06	102.5
FALSE	High	Master Protein	Q9UBU6	Protein FAM8A1 OS=Homo sapiens OX=9606 GN=FAM8A1 PE=1 SV=1	0.001	FALSE	6.044	13	2	2	2	1	413	44.1	7.21	0	2		membrane		Pf06271	51439	ENSG00000137414.5	FAM8A1	6			0	0.692	0.344	1.116	2.253	0.772	-0.53	-1.54	0.16	1.17	-0.37	0.703739	0.14063	0.994465	0.476232	0.91238	14.22	2.04	52.74	51.25	30.26	127.6
FALSE	High	Master Protein	Q92686	Neurogranin OS=Homo sapiens OX=9606 GN=NRGN PE=1 SV=1	0.001	FALSE	5.95	41	1	4	1	1	78	7.6	7.87	7.23	1	metabolic process;regulation of biological process;response to stimulus	cytoplasm;membrane;nucleus	catalytic activity;protein binding	Pf00612	4900	ENSG00000154146.12	NRGN	11			0	0.941	0.369	0.583	2.25	0.83	-0.09	-1.44	-0.78	1.17	-0.27	0.972197	0.0358244	0.362047	0.150359	0.923376	46.45	5.31	27.77	123.52	85.04	135.8
FALSE	High	Master Protein	O75487	Glypican-4 OS=Homo sapiens OX=9606 GN=GPC4 PE=1 SV=4	0.001	FALSE	5.618	3	1	2	1	1	556	62.4	6.68	5.7	1	cell proliferation;metabolic process;regulation of biological process;response to stimulus	extracellular;membrane;nucleus;organelle lumen	protein binding	Pf01153	2239	ENSG00000076716.8	GPC4	X	Wnt signaling pathway		0	1.603	1.103	1.545	2.245	2.476	0.68	0.14	0.63	1.17	1.31	0.406864	0.962137	0.769407	0.187408	0.272409	46.97	78.86	0	107.71	46.97	64.7
FALSE	Low	Master Protein	P21580	Tumor necrosis factor alpha-induced protein 3 OS=Homo sapiens OX=9606 GN=TNFAIP3 PE=1 SV=1	0.118	FALSE	1.245	2	1	4	1	1	790	89.6	8.22	0	1	cell death;cell organization and biogenesis;defense response;metabolic process;regulation of biological process;response to stimulus	cytoplasm;cytosol;nucleus;vacuole	catalytic activity;DNA binding;metal ion binding;protein binding	Pf01754, Pf02338	7128	ENSG00000118503.14	TNFAIP3	6	TNF signaling pathway; NOD-like receptor signaling pathway; Epstein-Barr virus infection; NF-kappa B signaling pathway; Measles	Regulation of toll-like receptor signaling pathway; TNF alpha Signaling Pathway	0	1.413	0.721	0.845	2.239	1.316	0.5	-0.47	-0.24	1.16	0.4	0.685244	0.95872	0.959036	0.481662	0.921137	29.76	55.15	22.3	87.17	50.22	96.6
FALSE	High	None	A9QM74	Importin subunit alpha-8 OS=Homo sapiens OX=9606 GN=KPNA7 PE=1 SV=1	0.002	FALSE	5.061	2	1	8	1	1	516	56.9	6.04	25.62	1	regulation of biological process;transport	cytoplasm;cytosol;nucleus	protein binding;transporter activity	Pf00514, Pf01749, Pf13513, Pf13646	402569	ENSG00000185467.7; ENSG00000284068.1	KPNA7	7; CHR_HG2088_PATCH			0	1.163	0.515	0.968	2.209	1.137	0.22	-0.96	-0.05	1.14	0.19	0.202992	0.0982425	0.979704	1.38574e-06	0.884868	26.11	13.03	13.36	47.61	21.62	104
FALSE	High	Master Protein	P39210	Protein Mpv17 OS=Homo sapiens OX=9606 GN=MPV17 PE=1 SV=1	0.001	FALSE	5.747	13	1	1	1	1	176	19.7	9.47	3.07	1	cell organization and biogenesis;regulation of biological process;response to stimulus	membrane;mitochondrion		Pf04117	4358	ENSG00000115204.14	MPV17	2	Peroxisome		0	1.299	0.555	0.943	2.205	1.224	0.38	-0.85	-0.09	1.14	0.29	0.826511	0.760977	0.988797	0.458498	0.959546	128.59	30.55	56.43	143.15	84.8	98.1
FALSE	High	Master Protein	P43007	Neutral amino acid transporter A OS=Homo sapiens OX=9606 GN=SLC1A4 PE=1 SV=1	0.003	FALSE	4.303	2	1	1	1	1	532	55.7	6.25	1.75	1	cell communication;transport	cell surface;membrane	transporter activity	Pf00375	6509	ENSG00000115902.10	SLC1A4	2			0	1.092	0.337	0.678	2.199	1.138	0.13	-1.57	-0.56	1.14	0.19	0.952508	0.108335	0.69847	0.262863	0.985678	22.65	2.57	36.81	81.14	52.79	126.2
FALSE	High	Master Protein	P19174	1-phosphatidylinositol 4,5-bisphosphate phosphodiesterase gamma-1 OS=Homo sapiens OX=9606 GN=PLCG1 PE=1 SV=1	0	FALSE	21.959	4	4	10	4	1	1290	148.4	6.05	31.28	4	cellular component movement;metabolic process;regulation of biological process;response to stimulus	cytoplasm;cytosol;membrane	catalytic activity;metal ion binding;protein binding;signal transducer activity	Pf00017, Pf00018, Pf00168, Pf00169, Pf00387, Pf00388, Pf03009, Pf07653, Pf09279, Pf14604	5335	ENSG00000124181.14	PLCG1	20	Th1 and Th2 cell differentiation; T cell receptor signaling pathway; HIF-1 signaling pathway; MicroRNAs in cancer; Phospholipase D signaling pathway; Epstein-Barr virus infection; Neurotrophin signaling pathway; VEGF signaling pathway; Rap1 signaling pathway; Non-small cell lung cancer; Natural killer cell mediated cytotoxicity; ErbB signaling pathway; Pathways in cancer; Thyroid hormone signalin…	ErbB Signaling Pathway; GPR40 PATHWAY; Kit receptor signaling pathway; Association Between Physico-Chemical Features and Toxicity Associated Pathways; IL-1 signaling pathway; MFAP5-mediated ovarian cancer cell motility and invasiveness; B Cell Receptor Signaling Pathway; PDGF Pathway; Angiogenesis; T-Cell Receptor and Co-stimulatory Signaling; Corticotropin-releasing hormone signaling pathway; RA…	0	0.875	0.576	0.967	2.196	0.962	-0.19	-0.8	-0.05	1.14	-0.06	0.866434	0.496432	0.985712	9.01115e-05	0.979113	38.79	21.25	32.37	79.37	51.17	96.1
FALSE	High	Master Protein	Q02880	DNA topoisomerase 2-beta OS=Homo sapiens OX=9606 GN=TOP2B PE=1 SV=3	0	FALSE	9.784	2	3	3	3	1	1626	183.2	8	6.51	3	cell organization and biogenesis;cellular component movement;metabolic process;regulation of biological process	cytoplasm;cytosol;nucleus	catalytic activity;DNA binding;metal ion binding;nucleotide binding;protein binding	Pf00204, Pf00521, Pf01751, Pf02518, Pf08070, Pf13589	7155	ENSG00000077097.15	TOP2B	3	Platinum drug resistance		0	0.671	0.442	1.237	2.196	1.452	-0.58	-1.18	0.31	1.13	0.54	0.528504	0.479638	0.965823	0.105406	0.852747	31.86	15.36	74.73	87.39	90.05	106.6
FALSE	High	Master Protein	Q9NX55	Huntingtin-interacting protein K OS=Homo sapiens OX=9606 GN=HYPK PE=1 SV=2	0	FALSE	11.897	32	2	4	2	1	129	14.7	4.93	19.84	2	regulation of biological process	cytoplasm;cytoskeleton;nucleus	protein binding		25764	ENSG00000242028.6	HYPK	15			0	1.465	0.724	1.134	2.193	1.661	0.55	-0.47	0.18	1.13	0.73	0.158899	0.856825	0.988797	0.0995625	0.508197	89.77	60.54	70.89	94.9	103.68	125.5
FALSE	High	None	Q9NR22	Protein arginine N-methyltransferase 8 OS=Homo sapiens OX=9606 GN=PRMT8 PE=1 SV=2	0	FALSE	14.979	10	3	13	3	1	394	45.3	6.93	37.6	3	cell organization and biogenesis;metabolic process;regulation of biological process	cytosol;membrane;nucleus	catalytic activity;protein binding	Pf08241, Pf12847, Pf13847	56341	ENSG00000111218.11	PRMT8	12			0	0.848	0.944	1.589	2.192	2.178	-0.24	-0.08	0.67	1.13	1.12	0.847085	0.999876	0.32963	0.00242247	0.0310913	35.05	77.56	59.83	39.65	96.32	54.4
FALSE	High	Master Protein	Q9Y248	DNA replication complex GINS protein PSF2 OS=Homo sapiens OX=9606 GN=GINS2 PE=1 SV=1	0.001	FALSE	5.787	6	1	1	1	1	185	21.4	5.44	3.27	1	metabolic process;response to stimulus	nucleus	catalytic activity;protein binding	Pf05916	51659	ENSG00000131153.8	GINS2	16			0	1.685	0.755	0.981	2.19	1.653	0.75	-0.41	-0.03	1.13	0.73	0.307077	0.962137	0.995238	0.371512	0.801069	0	0	0	0	0	78.5
FALSE	Low	Master Protein	Q6ZU67	BEN domain-containing protein 4 OS=Homo sapiens OX=9606 GN=BEND4 PE=2 SV=3	0.166	FALSE	1.03	4	1	8	1	1	534	58.3	6.13	0	1				Pf10523	389206	ENSG00000188848.15	BEND4	4			0	1.219	0.621	1.702	2.189	1.755	0.29	-0.69	0.77	1.13	0.81	0.888186	0.872338	0.694453	0.516557	0.672568	87.41	48.7	64.47	99.84	89.13	67.9
FALSE	High	Master Protein	Q8NFU3	Thiosulfate:glutathione sulfurtransferase OS=Homo sapiens OX=9606 GN=TSTD1 PE=1 SV=3	0	FALSE	20.149	49	2	14	2	1	115	12.5	6.07	57.25	2	metabolic process	cytoplasm;cytosol;mitochondrion	catalytic activity	Pf00581, Pf14566	100131187	ENSG00000215845.10	TSTD1	1			0	0.46	0.351	1.495	2.178	0.657	-1.12	-1.51	0.58	1.12	-0.61	7.36471e-08	0.0029397	0.495208	0.0312917	0.370455	24.63	12.91	86	73.95	31.5	208.4
FALSE	High	Master Protein	O14683	Tumor protein p53-inducible protein 11 OS=Homo sapiens OX=9606 GN=TP53I11 PE=1 SV=2	0.003	FALSE	4.196	5	1	3	1	1	189	21	9.55	4.46	1	regulation of biological process;response to stimulus	membrane		Pf14936	9537	ENSG00000175274.18	TP53I11	11			0	0.884	0.544	1.336	2.168	1.181	-0.18	-0.88	0.42	1.12	0.24	0.93246	0.679917	0.94153	0.247085	0.974738	24.42	7.71	57.31	59.4	69.13	110.8
FALSE	Medium	Master Protein	Q8N6N7	Acyl-CoA-binding domain-containing protein 7 OS=Homo sapiens OX=9606 GN=ACBD7 PE=1 SV=1	0.048	FALSE	1.927	18	1	1	1	1	88	9.8	6.71	3.07	1				Pf00887	414149	ENSG00000176244.6	ACBD7	10			0	100	100	3.644	2.168	100	6.64	6.64	1.87	1.12	6.64	4.12715e-16	3.81902e-16	0.00161594	0.123488	3.35161e-16			0	0
FALSE	Medium	Master Protein	Q8TEA1	Putative methyltransferase NSUN6 OS=Homo sapiens OX=9606 GN=NSUN6 PE=1 SV=1	0.015	FALSE	2.881	6	2	4	2	1	469	51.7	7.96	1.65	2	metabolic process	cytoplasm;cytosol	catalytic activity;RNA binding	Pf01189, Pf01472, Pf01728, Pf05175, Pf12847, Pf13659, Pf13847	221078	ENSG00000241058.3	NSUN6	10			0	1.07	0.908	1.278	2.157	1.508	0.1	-0.14	0.35	1.11	0.59	0.97396	0.999876	0.952816	0.256402	0.8694	43.36	114	78.03	66.35	84.64	100.8
FALSE	High	Master Protein	Q12974	Protein tyrosine phosphatase type IVA 2 OS=Homo sapiens OX=9606 GN=PTP4A2 PE=1 SV=1	0	FALSE	31.184	47	5	16	2	1	167	19.1	8.37	38.88	5	metabolic process	cytoplasm;cytosol;endosome;membrane;nucleus	catalytic activity	Pf00102, Pf00782	8073	ENSG00000184007.18	PTP4A2	1			3	0.858	0.602	1.247	2.15	1.077	-0.22	-0.73	0.32	1.1	0.11	0.803258	0.627724	0.875111	0.00673957	0.97884	40.84	42.31	43.87	89.21	64.32	84.9
FALSE	High	Master Protein Candidate	Q92771	Putative ATP-dependent RNA helicase DDX12 OS=Homo sapiens OX=9606 GN=DDX12P PE=5 SV=3	0.001	FALSE	5.223	1	1	2	1	1	950	105.9	8.24	3.18	1	metabolic process	nucleus	catalytic activity;DNA binding;nucleotide binding;RNA binding	Pf06733, Pf13307	440081		DDX12P	12			0	0.99	0.777	1.685	2.147	1.668	-0.01	-0.36	0.75	1.1	0.74	0.999944	0.975783	0.648712	0.448645	0.771054	0	0	0	0	0	90.2
FALSE	High	Master Protein Candidate	A8MPP1	Putative ATP-dependent RNA helicase DDX11-like protein 8 OS=Homo sapiens OX=9606 GN=DDX11L8 PE=1 SV=1	0.001	FALSE	5.223	1	1	2	1	1	907	101.7	7.47	3.18	1	metabolic process	nucleus	catalytic activity;DNA binding;nucleotide binding;protein binding;RNA binding	Pf06733, Pf13307			DDX11L8				0	0.99	0.777	1.685	2.147	1.668	-0.01	-0.36	0.75	1.1	0.74	0.999944	0.975783	0.648712	0.448645	0.771054	0	0	0	0	0	90.2
FALSE	High	Master Protein	Q96FC9	ATP-dependent DNA helicase DDX11 OS=Homo sapiens OX=9606 GN=DDX11 PE=1 SV=1	0.001	FALSE	5.223	1	1	2	1	1	970	108.2	7.31	3.18	1	cell organization and biogenesis;development;metabolic process;regulation of biological process;response to stimulus	chromosome;cytoplasm;cytoskeleton;nucleus	catalytic activity;DNA binding;metal ion binding;nucleotide binding;protein binding;RNA binding	Pf06733, Pf13307	1663	ENSG00000013573.16	DDX11	12			0	0.99	0.777	1.685	2.147	1.668	-0.01	-0.36	0.75	1.1	0.74	0.999944	0.975783	0.648712	0.448645	0.771054	0	0	0	0	0	90.2
FALSE	High	Master Protein	Q93015	N-alpha-acetyltransferase 80 OS=Homo sapiens OX=9606 GN=NAA80 PE=1 SV=2	0.005	FALSE	3.853	4	1	1	1	1	286	31.4	7.85	1.86	1		cytoplasm	catalytic activity	Pf00583	24142	ENSG00000243477.5	NAT6	3			0	0.863	0.53	0.931	2.146	0.738	-0.21	-0.92	-0.1	1.1	-0.44	0.934528	0.682216	0.988797	0.539667	0.88909	31.12	24.09	76.48	73.12	46.31	106.9
FALSE	High	Master Protein	Q9P021	Cysteine-rich PDZ-binding protein OS=Homo sapiens OX=9606 GN=CRIPT PE=1 SV=1	0.002	FALSE	4.544	11	1	2	1	1	101	11.2	9.47	4.73	1	cell organization and biogenesis;regulation of biological process	cytoplasm;nucleus	protein binding	Pf10235	9419	ENSG00000119878.5	CRIPT	2			0	0.39	0.418	2.373	2.142	0.895	-1.36	-1.26	1.25	1.1	-0.16	0.000154344	0.0912928	0.0792226	0.145471	0.947346	16.39	13.01	109.23	78.45	30.76	146.4
FALSE	High	Master Protein	Q9BVM2	Protein DPCD OS=Homo sapiens OX=9606 GN=DPCD PE=1 SV=2	0.005	FALSE	3.961	5	1	1	1	1	203	23.2	9.03	1.79	1	cellular component movement	nucleus	protein binding	Pf14913	25911	ENSG00000166171.12	DPCD	10			0	1.272	0.688	1.162	2.14	1.478	0.35	-0.54	0.22	1.1	0.56	0.85222	0.933633	0.988797	0.470315	0.873236	31.5	19.37	70.84	73.95	78.29	96.1
FALSE	High	None	Q86UF2	cTAGE family member 6 OS=Homo sapiens OX=9606 GN=CTAGE6 PE=2 SV=2	0	FALSE	6.761	2	1	1	1	1	777	87.8	5.16	3.33	1	metabolic process;regulation of biological process;transport	membrane		Pf04111, Pf04156, Pf05557, Pf07926, Pf08317, Pf12718, Pf14662	340307	ENSG00000271321.1	CTAGE6; CTAGE6P	7			0	1.58	0.776	1.317	2.139	2.081	0.66	-0.37	0.4	1.1	1.06	0.0502302	0.95872	0.911133	0.0760416	0.168705	52.8	53.26	83	53.89	69.39	71
FALSE	High	None	A4FU28	cTAGE family member 9 OS=Homo sapiens OX=9606 GN=CTAGE9 PE=2 SV=2	0	FALSE	6.761	2	1	1	1	1	777	87.9	5.31	3.33	1	metabolic process	membrane		Pf04111, Pf04156, Pf12128, Pf12718	643854	ENSG00000236761.5	CTAGE9	6			0	1.58	0.776	1.317	2.139	2.081	0.66	-0.37	0.4	1.1	1.06	0.0502302	0.95872	0.911133	0.0760416	0.168705	52.8	53.26	83	53.89	69.39	71
FALSE	High	None	P0CG41	cTAGE family member 8 OS=Homo sapiens OX=9606 GN=CTAGE8 PE=3 SV=1	0	FALSE	6.761	2	1	1	1	1	777	88	5.31	3.33	1	metabolic process;regulation of biological process;transport	membrane		Pf04111, Pf04156, Pf05557, Pf07926, Pf08317, Pf12128, Pf12718, Pf14662	100142659	ENSG00000244693.1	CTAGE8	7			0	1.58	0.776	1.317	2.139	2.081	0.66	-0.37	0.4	1.1	1.06	0.0502302	0.95872	0.911133	0.0760416	0.168705	52.8	53.26	83	53.89	69.39	71
FALSE	High	None	A4D2H0	cTAGE family member 15 OS=Homo sapiens OX=9606 GN=CTAGE15 PE=2 SV=1	0	FALSE	6.761	2	1	1	1	1	777	87.8	5.24	3.33	1	metabolic process;regulation of biological process;transport	membrane		Pf04111, Pf04156, Pf05557, Pf07926, Pf08317, Pf12718, Pf14662	441294	ENSG00000271079.1	CTAGE15; CTAGE15P	7			0	1.58	0.776	1.317	2.139	2.081	0.66	-0.37	0.4	1.1	1.06	0.0502302	0.95872	0.911133	0.0760416	0.168705	52.8	53.26	83	53.89	69.39	71
FALSE	High	None	Q8IX94	cTAGE family member 4 OS=Homo sapiens OX=9606 GN=CTAGE4 PE=2 SV=3	0	FALSE	6.761	2	1	1	1	1	777	87.9	5.26	3.33	1	metabolic process	membrane		Pf04111, Pf04156, Pf08317, Pf12128, Pf12718, Pf14662	100128553; 100142659	ENSG00000225932.3	CTAGE4; CTAGE8	7			0	1.58	0.776	1.317	2.139	2.081	0.66	-0.37	0.4	1.1	1.06	0.0502302	0.95872	0.911133	0.0760416	0.168705	52.8	53.26	83	53.89	69.39	71
FALSE	High	None	Q96NW7	Leucine-rich repeat-containing protein 7 OS=Homo sapiens OX=9606 GN=LRRC7 PE=1 SV=1	0.002	FALSE	4.777	2	2	3	2	1	1537	172.5	6.81	0	2	regulation of biological process;response to stimulus;transport	cytoplasm;extracellular;membrane;organelle lumen	protein binding	Pf00595, Pf12799, Pf13180, Pf13855	57554	ENSG00000033122.18	LRRC7	1			0	1.259	1.239	2.099	2.134	2.643	0.33	0.31	1.07	1.09	1.4	0.854696	0.867076	0.380638	0.470315	0.155897	87.18	35.62	87.18	35.62	0	65.1
FALSE	High	Master Protein	O14896	Interferon regulatory factor 6 OS=Homo sapiens OX=9606 GN=IRF6 PE=1 SV=1	0	FALSE	13.852	14	3	7	3	1	467	53.1	5.33	11.35	3	cell differentiation;cell proliferation;metabolic process;regulation of biological process;response to stimulus	cytoplasm;cytosol;nucleus	DNA binding;protein binding	Pf00605, Pf10401	3664	ENSG00000117595.10	IRF6	1		Hypothetical Craniofacial Development Pathway; Apoptosis; Primary Focal Segmental Glomerulosclerosis FSGS	0	0.941	0.467	1.583	2.132	0.928	-0.09	-1.1	0.66	1.09	-0.11	0.971302	0.506917	0.784174	0.262863	0.966962	17.89	12.38	95.28	80.99	57.58	111.5
FALSE	High	None	O60641	Clathrin coat assembly protein AP180 OS=Homo sapiens OX=9606 GN=SNAP91 PE=1 SV=2	0.002	FALSE	5.144	1	1	5	1	1	907	92.4	4.86	15.81	1	cell organization and biogenesis;regulation of biological process;transport	membrane	protein binding	Pf01417, Pf07651	9892	ENSG00000065609.14	SNAP91	6			0	1.311	0.545	0.762	2.131	1.161	0.39	-0.88	-0.39	1.09	0.22	0.30865	0.510552	0.619971	0.0197549	0.929578	72.08	43.54	28.31	204.82	67.6	94.6
FALSE	High	Master Protein	Q9H2H9	Sodium-coupled neutral amino acid transporter 1 OS=Homo sapiens OX=9606 GN=SLC38A1 PE=1 SV=1	0	FALSE	9.127	7	2	3	2	1	487	54	7.02	4.38	2	transport	membrane	protein binding;transporter activity	Pf01490	81539	ENSG00000111371.15	SLC38A1	12	Glutamatergic synapse; GABAergic synapse	Synaptic Vesicle Pathway	0	1.034	0.284	0.536	2.112	0.554	0.05	-1.82	-0.9	1.08	-0.85	0.990085	0.0295524	0.389824	0.487776	0.430755	49.38	2.44	13.1	42.28	15.16	160
FALSE	High	Master Protein	O14681	Etoposide-induced protein 2.4 homolog OS=Homo sapiens OX=9606 GN=EI24 PE=1 SV=4	0	FALSE	10.273	10	3	13	3	1	340	38.9	9.72	17.75	3	cell communication;cell death;metabolic process;regulation of biological process;response to stimulus	cytoplasm;cytosol;endoplasmic reticulum;Golgi;membrane;nucleus		Pf07264	9538	ENSG00000149547.14	EI24	11	p53 signaling pathway		0	1.087	0.637	1.175	2.112	1.236	0.12	-0.65	0.23	1.08	0.31	0.975594	0.865371	0.984781	0.166638	0.953713	15.55	17.01	14.79	42.87	21.95	63.5
FALSE	High	Master Protein	Q8IVV7	Glucose-induced degradation protein 4 homolog OS=Homo sapiens OX=9606 GN=GID4 PE=1 SV=1	0.006	FALSE	3.576	3	1	1	1	1	300	33.5	9.16	1.97	1	metabolic process		catalytic activity	Pf09783	79018	ENSG00000141034.9	GID4	17			0	1.763	0.913	1.122	2.111	1.977	0.82	-0.13	0.17	1.08	0.98	0.286474	0.999876	0.994465	0.409421	0.531928	49.16	46.21	13.01	43.62	50.08	70.5
FALSE	Medium	None	A4FU01	Myotubularin-related protein 11 OS=Homo sapiens OX=9606 GN=MTMR11 PE=2 SV=2	0.023	FALSE	2.513	1	1	5	1	1	709	79.5	7.03	7.08	1				Pf06602, Pf12578	10903	ENSG00000014914.20	MTMR11	1			0	0.823	0.53	1.255	2.109	1.118	-0.28	-0.92	0.33	1.08	0.16	0.894836	0.685557	0.969967	0.476019	0.985533	20.63	10.95	36.54	30.84	39.74	115.8
FALSE	High	Master Protein	Q8IUC4	Rhophilin-2 OS=Homo sapiens OX=9606 GN=RHPN2 PE=1 SV=1	0	FALSE	18.823	8	4	6	4	1	686	76.9	6.8	16.14	4	regulation of biological process;response to stimulus	cytoplasm;cytosol	protein binding	Pf02185, Pf03097	85415	ENSG00000131941.7	RHPN2	19		G13 Signaling Pathway	0	0.938	0.662	1.164	2.109	1.345	-0.09	-0.59	0.22	1.08	0.43	0.97396	0.843533	0.979704	0.151178	0.876014	28.94	4.34	40.3	25.23	5.39	60.3
FALSE	High	Master Protein	Q9NPD8	Ubiquitin-conjugating enzyme E2 T OS=Homo sapiens OX=9606 GN=UBE2T PE=1 SV=1	0	FALSE	26.818	31	5	17	5	1	197	22.5	7.99	36.84	5	metabolic process;response to stimulus	cytoplasm;nucleus	catalytic activity;nucleotide binding;protein binding	Pf00179, Pf14461	29089	ENSG00000077152.9	UBE2T	1	Fanconi anemia pathway	Gastric cancer network 2	0	0.805	0.427	1.112	2.106	1.006	-0.31	-1.23	0.15	1.07	0.01	0.668485	0.189068	0.988797	0.116628	0.995752	21.71	4.19	59.04	57.94	61	111.4
FALSE	High	Master Protein	Q9BUL5	PHD finger protein 23 OS=Homo sapiens OX=9606 GN=PHF23 PE=1 SV=1	0	FALSE	8.183	6	2	3	2	1	403	43.8	5.78	7.78	2	cell organization and biogenesis;metabolic process;regulation of biological process	cytoplasm;nucleus	metal ion binding;protein binding	Pf00628, Pf13771, Pf13831	79142	ENSG00000040633.12	PHF23	17			0	1.048	0.652	1.447	2.102	1.418	0.07	-0.62	0.53	1.07	0.5	0.949834	0.79738	0.738453	0.0909958	0.795152	18.74	10.72	35.79	44.93	47.69	98.5
FALSE	High	Master Protein	P62745	Rho-related GTP-binding protein RhoB OS=Homo sapiens OX=9606 GN=RHOB PE=1 SV=1	0	FALSE	26.917	41	4	41	2	1	196	22.1	5.24	137.82	4	cell death;cell differentiation;development;regulation of biological process;response to stimulus;transport	cytosol;endosome;membrane;nucleus	catalytic activity;nucleotide binding;protein binding	Pf00025, Pf00071, Pf08477	388	ENSG00000143878.9	RHOB	2		Neural Crest Differentiation; Androgen receptor signaling pathway; Spinal Cord Injury; Focal Adhesion	0	1.247	0.566	0.952	2.099	1.187	0.32	-0.82	-0.07	1.07	0.25	0.863173	0.777075	0.989515	0.535218	0.969017	153.77	22.3	78.95	164.6	117.09	100
FALSE	High	Master Protein	Q9BW19	Kinesin-like protein KIFC1 OS=Homo sapiens OX=9606 GN=KIFC1 PE=1 SV=2	0.001	FALSE	6.271	5	2	5	2	1	673	73.7	8.98	8.7	2	cell division;cell organization and biogenesis;cellular component movement	cytoplasm;cytoskeleton;endosome;membrane;nucleus	catalytic activity;motor activity;nucleotide binding;protein binding	Pf00225	3833	ENSG00000237649.7; ENSG00000204197.9; ENSG00000233450.7	KIFC1	6; CHR_HSCHR6_MHC_QBL_CTG1; CHR_HSCHR6_MHC_SSTO_CTG1			0	0.834	0.428	0.959	2.095	0.728	-0.26	-1.22	-0.06	1.07	-0.46	0.868581	0.34071	0.988797	0.313191	0.836111	19.23	9.51	41.08	51.96	18.06	137.2
FALSE	High	Master Protein	Q6P1X5	Transcription initiation factor TFIID subunit 2 OS=Homo sapiens OX=9606 GN=TAF2 PE=1 SV=3	0	FALSE	7.528	4	2	2	2	1	1199	136.9	8.19	3.42	2	cell organization and biogenesis;metabolic process;regulation of biological process;response to stimulus	nucleus	catalytic activity;DNA binding;metal ion binding;protein binding	Pf01433	6873	ENSG00000064313.11	TAF2	8	Basal transcription factors		0	1.461	0.384	1.146	2.094	0.734	0.55	-1.38	0.2	1.07	-0.45	0.28681	0.111974	0.985712	0.129705	0.767539	38.4	8.73	95.09	86.62	37.65	33.7
FALSE	High	Master Protein	Q9NPB8	Glycerophosphocholine phosphodiesterase GPCPD1 OS=Homo sapiens OX=9606 GN=GPCPD1 PE=1 SV=2	0.002	FALSE	4.436	2	1	1	1	1	672	76	5.53	2.62	1	cellular homeostasis;metabolic process	cytoplasm;cytosol	catalytic activity	Pf00686, Pf03009	56261	ENSG00000125772.12	GPCPD1	20	Choline metabolism in cancer; Glycerophospholipid metabolism		0	1.187	1.302	2.257	2.084	2.713	0.25	0.38	1.17	1.06	1.44	0.902551	0.865371	0.113019	0.181708	0.0791888	9.45	9.82	70.31	70.41	70.46	64.3
FALSE	High	Master Protein	Q8TAE6	Protein phosphatase 1 regulatory subunit 14C OS=Homo sapiens OX=9606 GN=PPP1R14C PE=1 SV=3	0.001	FALSE	5.993	10	1	5	1	1	165	17.8	5.16	12.76	1	regulation of biological process	cytoplasm;membrane	enzyme regulator activity	Pf05361	81706	ENSG00000198729.4	PPP1R14C	6			0	1.042	1.013	1.862	2.082	1.94	0.06	0.02	0.9	1.06	0.96	0.987704	0.999876	0.108129	0.0139502	0.120243	25.97	22.15	22.1	19.86	13.83	81.4
FALSE	Low	Master Protein	Q96HP0	Dedicator of cytokinesis protein 6 OS=Homo sapiens OX=9606 GN=DOCK6 PE=1 SV=3	0.065	FALSE	1.706	1	1	3	1	1	2047	229.4	6.74	0	1	coagulation;regulation of biological process;response to stimulus	cytoplasm;cytosol		Pf06920, Pf11878, Pf14429	57572	ENSG00000130158.13	DOCK6	19			0	1.063	0.503	0.821	2.08	0.872	0.09	-0.99	-0.29	1.06	-0.2	0.979532	0.433549	0.910305	0.299485	0.938638	19.92	17.7	15.89	66.17	17.94	116
FALSE	High	Master Protein	Q8N729	Neuropeptide W OS=Homo sapiens OX=9606 GN=NPW PE=1 SV=2	0.009	FALSE	3.274	5	1	2	1	1	165	18	11.62	3.68	1	regulation of biological process;response to stimulus	extracellular	protein binding	Pf15180	283869	ENSG00000183971.6	NPW	16			0	3.045	1.514	1.397	2.074	2.808	1.61	0.6	0.48	1.05	1.49	0.000848252	0.679334	0.911133	0.481399	0.133409	62.54	73.68	53.79	79.73	51.85	62.4
FALSE	High	Master Protein	Q56P03	E2F-associated phosphoprotein OS=Homo sapiens OX=9606 GN=EAPP PE=1 SV=4	0.001	FALSE	6.533	9	1	2	1	1	285	32.7	5.12	2.51	1	regulation of biological process	cytoplasm;nucleus		Pf10238	55837	ENSG00000129518.8	EAPP	14			0	1.71	0.793	0.957	2.064	1.636	0.77	-0.34	-0.06	1.05	0.71	0.262638	0.97818	0.988934	0.415632	0.812876	0	0	0	0	0	77.9
FALSE	High	Master Protein	P04183	Thymidine kinase, cytosolic OS=Homo sapiens OX=9606 GN=TK1 PE=1 SV=2	0	FALSE	39.088	54	8	18	8	1	234	25.5	8.51	54.13	8	cell organization and biogenesis;metabolic process	cytoplasm;cytosol	catalytic activity;metal ion binding;nucleotide binding;protein binding	Pf00265	7083	ENSG00000167900.11	TK1	17	Metabolic pathways; Pyrimidine metabolism; Drug metabolism - other enzymes	Fluoropyrimidine Activity	0	0.938	0.584	1.391	2.059	1.297	-0.09	-0.78	0.48	1.04	0.38	0.952506	0.334537	0.337397	5.31759e-05	0.545146	53.39	25.17	60.88	87.1	77.34	111.5
FALSE	High	None	O75925	E3 SUMO-protein ligase PIAS1 OS=Homo sapiens OX=9606 GN=PIAS1 PE=1 SV=2	0.001	FALSE	6.307	2	1	2	1	1	651	71.8	7.3	2.66	1	cell differentiation;cell organization and biogenesis;metabolic process;regulation of biological process;response to stimulus	nucleus	catalytic activity;DNA binding;metal ion binding;protein binding	Pf02891, Pf14324	8554	ENSG00000033800.13	PIAS1	15	Ubiquitin mediated proteolysis; Jak-STAT signaling pathway; Hepatitis C	Mesodermal Commitment Pathway; Interferon type I signaling pathways; Androgen receptor signaling pathway; Interleukin-11 Signaling Pathway; TGF-beta Signaling Pathway	0	0.994	0.593	1.226	2.055	1.218	-0.01	-0.75	0.29	1.04	0.28	0.991735	0.811218	0.984781	0.453045	0.969017	40.55	1.23	44.78	57.49	58.87	105.1
FALSE	High	Master Protein	O75928	E3 SUMO-protein ligase PIAS2 OS=Homo sapiens OX=9606 GN=PIAS2 PE=1 SV=3	0	FALSE	7.845	6	2	3	2	1	621	68.2	7.52	2.66	2	metabolic process;regulation of biological process;response to stimulus	nucleus	catalytic activity;DNA binding;metal ion binding;protein binding	Pf02891, Pf14324	9063	ENSG00000078043.15	PIAS2	18	Ubiquitin mediated proteolysis; Pathways in cancer; Jak-STAT signaling pathway; Small cell lung cancer	Androgen receptor signaling pathway; TGF-beta Signaling Pathway	0	0.756	0.398	1.114	2.046	0.813	-0.4	-1.33	0.16	1.03	-0.3	0.804031	0.334537	0.994465	0.368426	0.921137	7.9	3.89	34.66	45.6	13.73	63.6
FALSE	High	Master Protein	P08582	Melanotransferrin OS=Homo sapiens OX=9606 GN=MELTF PE=1 SV=2	0	FALSE	8.662	4	2	2	2	1	738	80.2	5.94	2.5	2	metabolic process;regulation of biological process;transport	cell surface;extracellular;membrane;organelle lumen	metal ion binding;protein binding	Pf00405, Pf12974	4241	ENSG00000163975.11	MFI2; MELTF	3			0	1.5	1.182	1.606	2.037	2.408	0.58	0.24	0.68	1.03	1.27	0.554455	0.941119	0.763312	0.328861	0.307608	7.02	6.95	0	1.53	7.02	65.7
FALSE	High	None	P49137	MAP kinase-activated protein kinase 2 OS=Homo sapiens OX=9606 GN=MAPKAPK2 PE=1 SV=1	0	FALSE	8.852	5	2	12	2	1	400	45.5	8.68	9.51	2	defense response;metabolic process;regulation of biological process;response to stimulus;transport	cytoplasm;cytosol;nucleus	catalytic activity;nucleotide binding;protein binding;signal transducer activity	Pf00069, Pf07714, Pf14531	9261	ENSG00000162889.10	MAPKAPK2	1	Viral carcinogenesis; Neurotrophin signaling pathway; VEGF signaling pathway; MAPK signaling pathway	Structural Pathway of Interleukin 1 (IL-1); VEGFA-VEGFR2 Signaling Pathway; Serotonin Receptor 2 and ELK-SRF/GATA4 signaling; MAPK Signaling Pathway; IL-1 signaling pathway; Regulation of Microtubule Cytoskeleton; Serotonin Receptor 4/6/7 and NR3C Signaling; p38 MAPK Signaling Pathway; Fas Ligand (FasL) pathway and Stress induction of Heat Shock Proteins (HSP) regulation	0	1.139	0.636	1.182	2.037	1.296	0.19	-0.65	0.24	1.03	0.37	0.846186	0.79648	0.984781	0.13651	0.889511	33.33	9.67	22.66	55.3	44.73	90.3
FALSE	High	Master Protein	Q92889	DNA repair endonuclease XPF OS=Homo sapiens OX=9606 GN=ERCC4 PE=1 SV=3	0	FALSE	8.401	4	2	3	2	1	916	104.4	6.93	6.71	2	cell organization and biogenesis;metabolic process;regulation of biological process;response to stimulus	nucleus	catalytic activity;DNA binding;enzyme regulator activity;protein binding	Pf02732	2072	ENSG00000175595.14	ERCC4	16	Fanconi anemia pathway; Nucleotide excision repair		0	0.91	0.506	0.752	2.037	0.844	-0.14	-0.98	-0.41	1.03	-0.24	0.954606	0.621557	0.850332	0.468419	0.929578	36.51	10.27	24.16	83.3	48.86	87.2
FALSE	High	Master Protein	Q8WTV0	Scavenger receptor class B member 1 OS=Homo sapiens OX=9606 GN=SCARB1 PE=1 SV=1	0	FALSE	13.67	7	4	12	4	1	552	60.8	8.24	21.1	4	cell organization and biogenesis;cell proliferation;cellular component movement;metabolic process;regulation of biological process;response to stimulus;transport	cell surface;cytoplasm;membrane	protein binding;receptor activity;signal transducer activity;transporter activity	Pf01130	949	ENSG00000073060.15	SCARB1	12	Fat digestion and absorption; Ovarian steroidogenesis; Bile secretion; Phagosome; Aldosterone synthesis and secretion; Vitamin digestion and absorption; Hepatitis C	Vitamin A and Carotenoid Metabolism; Folate Metabolism; Sterol Regulatory Element-Binding Proteins (SREBP) signalling; Vitamin B12 Metabolism; Statin Pathway; Selenium Micronutrient Network	0	1.203	0.459	0.722	2.035	0.72	0.27	-1.12	-0.47	1.02	-0.47	0.116669	0.0481362	0.16804	0.000240088	0.376229	53.13	18.18	34.2	114.9	37.46	84.2
FALSE	Medium	None	Q9UP52	Transferrin receptor protein 2 OS=Homo sapiens OX=9606 GN=TFR2 PE=1 SV=1	0.024	FALSE	2.427	1	1	1	1	1	801	88.7	6.11	0	1	cellular homeostasis;defense response;regulation of biological process;response to stimulus;transport	cytoplasm;membrane	protein binding;receptor activity	Pf02225, Pf04253, Pf04389	7036	ENSG00000106327.12	TFR2	7		Iron metabolism in placenta	0	1.028	0.404	0.735	2.032	0.606	0.04	-1.31	-0.44	1.02	-0.72	0.981907	0.376431	0.831123	0.667508	0.710187	29.44	7.48	37.56	47.29	23.17	138
FALSE	Low	Master Protein	A1KZ92	Peroxidasin-like protein OS=Homo sapiens OX=9606 GN=PXDNL PE=1 SV=3	0.079	FALSE	1.562	1	1	5	1	1	1463	163.6	7.43	7.05	1	metabolic process;response to stimulus	cytoplasm;extracellular	antioxidant activity;catalytic activity;metal ion binding;protein binding	Pf00047, Pf00093, Pf03098, Pf05825, Pf07679, Pf12714, Pf12799, Pf13855, Pf13895, Pf13927	137902	ENSG00000147485.12	PXDNL	8			0	2.477	1.499	1.338	2.03	3.576	1.31	0.58	0.42	1.02	1.84	0.000474698	0.678676	0.898447	0.204321	0.0122372	93.49	88.85	69.93	60.94	80.8	44.4
FALSE	High	Master Protein	P55211	Caspase-9 OS=Homo sapiens OX=9606 GN=CASP9 PE=1 SV=3	0	FALSE	9.134	9	2	6	2	1	416	46.3	6.05	4.4	2	cell death;cell differentiation;metabolic process;regulation of biological process;response to stimulus	cytoplasm;cytosol;mitochondrion;nucleus	catalytic activity;enzyme regulator activity;protein binding	Pf00619, Pf00656	842	ENSG00000132906.17	CASP9	1	Hepatitis B; Pancreatic cancer; Huntington's disease; VEGF signaling pathway; Non-small cell lung cancer; Endometrial cancer; Colorectal cancer; Pathways in cancer; Prostate cancer; Thyroid hormone signaling pathway; Apoptosis - multiple species; Tuberculosis; Toxoplasmosis; Apoptosis; Parkinson's disease; Alzheimer's disease; p53 signaling pathway; Small cell lung cancer; Amyotrophic lateral scl…	Rac1/Pak1/p38/MMP-2 pathway; Allograft Rejection; Integrated Breast Cancer Pathway; Nucleotide-binding Oligomerization Domain (NOD) pathway; Amyotrophic lateral sclerosis (ALS); Corticotropin-releasing hormone signaling pathway; Apoptosis Modulation by HSP70; Oxidative Damage; Fas Ligand (FasL) pathway and Stress induction of Heat Shock Proteins (HSP) regulation; Hepatitis C and Hepatocellular Ca…	0	1.45	1.508	1.573	2.024	2.281	0.54	0.59	0.65	1.02	1.19	0.634225	0.741659	0.795427	0.213134	0.314935	67.48	94.53	55.26	90.96	54.57	31.9
FALSE	High	Master Protein	O95379	Tumor necrosis factor alpha-induced protein 8 OS=Homo sapiens OX=9606 GN=TNFAIP8 PE=1 SV=1	0	FALSE	16.535	10	1	8	1	1	198	23	7.93	33.06	1	cell death;regulation of biological process	cytoplasm	enzyme regulator activity;protein binding	Pf05527	25816	ENSG00000145779.7	TNFAIP8	5			0	0.866	0.441	0.826	2.023	0.75	-0.21	-1.18	-0.28	1.02	-0.42	0.929373	0.426966	0.94153	0.394623	0.852747	57.03	11.15	30.52	54.65	44.39	149.7
FALSE	High	Master Protein	O15085	Rho guanine nucleotide exchange factor 11 OS=Homo sapiens OX=9606 GN=ARHGEF11 PE=1 SV=1	0	FALSE	7.186	2	2	3	2	1	1522	167.6	5.5	2.3	2	cell organization and biogenesis;cellular component movement;regulation of biological process;response to stimulus	cytoplasm;cytosol;membrane	enzyme regulator activity;protein binding	Pf00595, Pf00615, Pf00621, Pf09128, Pf13180	9826	ENSG00000132694.18	ARHGEF11	1	Vascular smooth muscle contraction; Pathways in cancer		0	0.78	1.165	2.297	2.022	2.677	-0.36	0.22	1.2	1.02	1.42	0.701481	0.941119	0.00611918	0.0655837	0.00836693	32.83	43.2	132.29	47.91	49.09	49
FALSE	Low	Master Protein	Q8N5B7	Ceramide synthase 5 OS=Homo sapiens OX=9606 GN=CERS5 PE=2 SV=1	0.129	FALSE	1.183	2	1	1	1	1	392	45.7	7.97	0	1	metabolic process	endoplasmic reticulum;membrane;nucleus	catalytic activity;DNA binding	Pf00046, Pf03798	91012	ENSG00000139624.12	CERS5	12	Sphingolipid metabolism; Sphingolipid signaling pathway; Metabolic pathways	Sphingolipid Metabolism	0	1.088	0.555	0.932	2.022	1.013	0.12	-0.85	-0.1	1.02	0.02	0.966235	0.761461	0.988797	0.55916	0.995752	48.88	13.87	32.36	25.31	41.36	109.4
FALSE	High	Master Protein	Q92574	Hamartin OS=Homo sapiens OX=9606 GN=TSC1 PE=1 SV=2	0.002	FALSE	4.441	3	2	2	2	1	1164	129.7	6.47	0	2	cell differentiation;cell organization and biogenesis;cellular component movement;metabolic process;regulation of biological process;response to stimulus;transport	cytoplasm;cytoskeleton;cytosol;membrane;nucleus	catalytic activity;motor activity;protein binding	Pf00261, Pf01576, Pf02388, Pf02463, Pf03357, Pf04111, Pf04156, Pf04388, Pf04912, Pf05483, Pf05557, Pf07926, Pf08317, Pf10473, Pf12128, Pf12718, Pf12795, Pf13851, Pf13868, Pf14643, Pf14915, Pf14988	7248	ENSG00000165699.13	TSC1	9	Insulin signaling pathway; Phospholipase D signaling pathway; Choline metabolism in cancer; AMPK signaling pathway; mTOR signaling pathway; Longevity regulating pathway; PI3K-Akt signaling pathway	Wnt Signaling Pathway Netpath; 4-hydroxytamoxifen, Dexamethasone, and Retinoic Acids Regulation of p27 Expression; Nanoparticle triggered autophagic cell death; Integrated Breast Cancer Pathway; AMP-activated Protein Kinase (AMPK) Signaling; Insulin Signaling; Focal Adhesion-PI3K-Akt-mTOR-signaling pathway; BDNF-TrkB Signaling; Signaling Pathways in Glioblastoma; Target Of Rapamycin (TOR) Signali…	0	1.979	0.826	0.804	2.019	1.827	0.98	-0.28	-0.32	1.01	0.87	0.13427	0.992929	0.935569	0.379663	0.653229	21.85	14.22	27.7	45.36	50.61	63.1
FALSE	High	Master Protein	Q96HA7	Tonsoku-like protein OS=Homo sapiens OX=9606 GN=TONSL PE=1 SV=2	0	FALSE	17.681	8	4	7	4	1	1378	150.8	6.42	14.22	4	metabolic process;regulation of biological process;response to stimulus	cytoplasm;nucleus	protein binding	Pf00023, Pf12796, Pf13414, Pf13424, Pf13606, Pf13637, Pf13855, Pf13857	4796	ENSG00000160949.16	TONSL	8			0	1.058	0.22	0.404	2.017	0.428	0.08	-2.19	-1.31	1.01	-1.22	0.979547	0.00757748	0.073637	0.642498	0.221549	5.21	0.49	0	0	0.95	187.9
FALSE	High	Master Protein	Q9BVL4	Selenoprotein O OS=Homo sapiens OX=9606 GN=SELENOO PE=1 SV=3	0	FALSE	16.025	9	3	11	3	1	669	73.4	5.97	18.04	3		mitochondrion		Pf02696	83642	ENSG00000073169.13	SELO; SELENOO	22		Selenium Micronutrient Network; Selenium Metabolism and Selenoproteins	0	1.383	0.984	1.028	2.016	1.846	0.47	-0.02	0.04	1.01	0.88	0.436846	0.999876	0.999922	0.202063	0.489873	64.02	77.69	39.14	87.56	67.2	64.4
FALSE	High	Master Protein	Q9NRZ9	Lymphoid-specific helicase OS=Homo sapiens OX=9606 GN=HELLS PE=1 SV=1	0	FALSE	33.4	11	7	36	6	1	838	97	7.93	63.17	7	cell division;cell organization and biogenesis;cell proliferation;development;metabolic process;regulation of biological process	nucleus	catalytic activity;nucleotide binding;protein binding	Pf00176, Pf00271, Pf11496	3070	ENSG00000119969.14	HELLS	10		Apoptosis; Apoptosis-related network due to altered Notch3 in ovarian cancer	0	0.908	0.57	1.103	2.015	0.975	-0.14	-0.81	0.14	1.01	-0.04	0.894836	0.340175	0.988797	0.000787063	0.991949	25.36	20.63	43.48	53.36	41.02	110.7
FALSE	High	Master Protein	Q13952	Nuclear transcription factor Y subunit gamma OS=Homo sapiens OX=9606 GN=NFYC PE=1 SV=3	0.001	FALSE	6.349	5	2	3	2	1	458	50.3	6.1	6.88	2	metabolic process;regulation of biological process	nucleus	DNA binding;protein binding	Pf00125, Pf00808	4802	ENSG00000066136.20	NFYC	1	Tuberculosis; Antigen processing and presentation		0	0.869	1.029	1.027	2.007	1.366	-0.2	0.04	0.04	1	0.45	0.894836	0.985944	0.999922	0.193378	0.852747	2.35	28.28	90.49	61.75	82.28	102.1
FALSE	High	Master Protein	P56945	Breast cancer anti-estrogen resistance protein 1 OS=Homo sapiens OX=9606 GN=BCAR1 PE=1 SV=2	0	FALSE	13.386	7	3	3	3	1	870	93.3	5.67	4.7	3	cell division;cell organization and biogenesis;cell proliferation;cellular component movement;regulation of biological process;response to stimulus	cytoplasm;cytoskeleton;cytosol;membrane	protein binding;signal transducer activity	Pf00018, Pf07653, Pf08824, Pf12026, Pf14604	9564	ENSG00000050820.16	BCAR1	16	Rap1 signaling pathway; Focal adhesion; Regulation of actin cytoskeleton; Leukocyte transendothelial migration; Bacterial invasion of epithelial cells; Chemokine signaling pathway	Chemokine signaling pathway; EGF/EGFR Signaling Pathway; Focal Adhesion; Regulation of Actin Cytoskeleton; miR-509-3p alteration of YAP1/ECM axis; VEGFA-VEGFR2 Signaling Pathway; TGF-beta Signaling Pathway; Integrin-mediated Cell Adhesion	0	1.232	0.758	1.127	1.996	1.556	0.3	-0.4	0.17	1	0.64	0.818206	0.928846	0.994168	0.247085	0.79596	40.31	22.52	30.51	67.02	64.41	124.7
FALSE	High	Master Protein	Q7L5Y9	E3 ubiquitin-protein transferase MAEA OS=Homo sapiens OX=9606 GN=MAEA PE=1 SV=1	0	FALSE	8.769	10	3	3	3	1	396	45.3	8.69	5.34	3	cell division;cell organization and biogenesis;metabolic process;regulation of biological process	cytoplasm;cytoskeleton;membrane;nucleus	catalytic activity;protein binding	Pf10607	10296	ENSG00000090316.15	MAEA	4			0	1.071	0.368	1.325	1.991	1.329	0.1	-1.44	0.41	0.99	0.41	0.964913	0.22477	0.905386	0.344624	0.909496	48.81	11.08	68.88	145.09	44.03	107.7
FALSE	High	Master Protein	Q96S19	Methyltransferase-like 26 OS=Homo sapiens OX=9606 GN=METTL26 PE=1 SV=2	0.009	FALSE	3.268	8	1	1	1	1	204	22.6	7.83	2.05	1			catalytic activity	Pf05175, Pf06080, Pf13649, Pf13659	84326	ENSG00000130731.15	C16orf13; METTL26	16			0	0.528	0.658	2.478	1.99	1.308	-0.92	-0.6	1.31	0.99	0.39	0.404541	0.949277	0.140237	0.66967	0.923376	0	0	0	0	0	114.5
FALSE	High	Master Protein	Q16877	6-phosphofructo-2-kinase/fructose-2,6-bisphosphatase 4 OS=Homo sapiens OX=9606 GN=PFKFB4 PE=2 SV=6	0	FALSE	8.474	4	2	4	1	1	469	54	6.62	8.95	2	metabolic process;regulation of biological process	cytosol	catalytic activity;nucleotide binding	Pf00300, Pf01591, Pf13207, Pf13671	5210	ENSG00000114268.11	PFKFB4	3	Fructose and mannose metabolism; AMPK signaling pathway	Focal Adhesion-PI3K-Akt-mTOR-signaling pathway	0	1.177	0.301	0.51	1.989	0.6	0.23	-1.73	-0.97	0.99	-0.74	0.866434	0.0294041	0.244589	0.563783	0.587686	67.58	0.47	18.17	0	1.85	130
FALSE	High	Master Protein	Q96BJ3	Axin interactor, dorsalization-associated protein OS=Homo sapiens OX=9606 GN=AIDA PE=1 SV=1	0	FALSE	20.355	16	3	14	3	1	306	35	6.55	21.76	3	development;regulation of biological process	cytoplasm;membrane	protein binding	Pf08910, Pf14186	64853	ENSG00000186063.12	AIDA	1			0	1.242	1.211	1.824	1.981	2.481	0.31	0.28	0.87	0.99	1.31	0.863173	0.915351	0.356867	0.0312484	0.0377842	55.71	50.48	65.23	58.09	61.29	31.7
FALSE	High	Master Protein	P07942	Laminin subunit beta-1 OS=Homo sapiens OX=9606 GN=LAMB1 PE=1 SV=2	0	FALSE	131.729	20	19	95	19	1	1786	197.9	4.94	282.14	19	cell differentiation;cell organization and biogenesis;cellular component movement;metabolic process;regulation of biological process;response to stimulus;transport	extracellular;membrane;organelle lumen	catalytic activity;motor activity;nucleotide binding;protein binding;signal transducer activity;structural molecule activity	Pf00015, Pf00053, Pf00055, Pf01576, Pf02841, Pf03938, Pf04156, Pf05103, Pf05335, Pf05667, Pf05698, Pf05701, Pf06428, Pf07111, Pf07767, Pf08317, Pf08647, Pf09731, Pf10174, Pf13476, Pf13514, Pf13851, Pf15346, Pf15619	3912	ENSG00000091136.13	LAMB1	7	Amoebiasis; Pathways in cancer; Toxoplasmosis; Focal adhesion; Small cell lung cancer; ECM-receptor interaction; PI3K-Akt signaling pathway	Inflammatory Response Pathway; Alpha 6 Beta 4 signaling pathway; Focal Adhesion-PI3K-Akt-mTOR-signaling pathway; Focal Adhesion	0	1.285	0.7	1.185	1.978	1.369	0.36	-0.51	0.24	0.98	0.45	0.0182868	0.780811	0.876436	3.75394e-05	0.35411	53.49	24.84	46.7	48.22	47.95	78.5
FALSE	High	Master Protein	Q01201	Transcription factor RelB OS=Homo sapiens OX=9606 GN=RELB PE=1 SV=2	0	FALSE	6.542	6	2	2	2	1	579	62.1	6.24	2.26	2	cell differentiation;defense response;metabolic process;regulation of biological process;response to stimulus	cytoplasm;cytoskeleton;cytosol;nucleus	DNA binding;protein binding	Pf00554	5971	ENSG00000104856.13	RELB	19	Osteoclast differentiation; Epstein-Barr virus infection; MAPK signaling pathway; NF-kappa B signaling pathway; HTLV-I infection	Toll-like Receptor Signaling; TNF related weak inducer of apoptosis (TWEAK) Signaling Pathway; EDA Signalling in Hair Follicle Development; Photodynamic therapy-induced NF-kB survival signaling; RANKL/RANK (Receptor activator of NFKB (ligand)) Signaling Pathway	0	0.905	0.788	1.643	1.977	1.335	-0.14	-0.34	0.72	0.98	0.42	0.963729	0.980861	0.72479	0.634177	0.923376	42.09	42.71	77.6	94.95	74.24	105.7
FALSE	High	Master Protein	Q5F1R6	DnaJ homolog subfamily C member 21 OS=Homo sapiens OX=9606 GN=DNAJC21 PE=1 SV=2	0	FALSE	16.629	10	3	7	3	1	531	62	5.47	17.83	3	metabolic process	cytoplasm;nucleus;ribosome	DNA binding;metal ion binding;protein binding;RNA binding	Pf00226, Pf12171, Pf12874, Pf13868, Pf13892	134218	ENSG00000168724.14	DNAJC21	5			0	1.275	1	1.262	1.964	1.475	0.35	0	0.34	0.97	0.56	0.380849	0.997074	0.826113	0.016512	0.508518	62.64	57.16	85.47	80.51	85.32	114.6
FALSE	High	Master Protein	Q9H6H4	Receptor expression-enhancing protein 4 OS=Homo sapiens OX=9606 GN=REEP4 PE=1 SV=1	0	FALSE	20.971	13	2	7	2	1	257	29.4	9.73	33.47	2	cell division;cell organization and biogenesis	endoplasmic reticulum;membrane	protein binding	Pf03134	80346	ENSG00000168476.11	REEP4	8			0	1.257	0.393	0.773	1.963	0.829	0.33	-1.35	-0.37	0.97	-0.27	0.491453	0.0626317	0.743763	0.213239	0.875718	21.26	11.06	38.56	94.07	56.88	139.6
FALSE	High	None	A6NNY8	Ubiquitin carboxyl-terminal hydrolase 27 OS=Homo sapiens OX=9606 GN=USP27X PE=1 SV=3	0	FALSE	7.569	6	1	2	1	1	438	49.6	7.18	8.57	1	metabolic process;regulation of biological process	cytoplasm;cytosol;nucleus	catalytic activity	Pf00443, Pf13423	389856	ENSG00000273820.1	USP27X	X			0	0.906	0.255	0.507	1.963	0.459	-0.14	-1.97	-0.98	0.97	-1.12	0.95141	0.0248928	0.263806	0.550021	0.258943	10.05	4.45	0	62.86	2.58	153.9
FALSE	Medium	None	P61129	Zinc finger CCCH domain-containing protein 6 OS=Homo sapiens OX=9606 GN=ZC3H6 PE=1 SV=2	0.042	FALSE	2.051	1	1	1	1	1	1189	131.6	7.64	0	1			metal ion binding	Pf00642	376940	ENSG00000188177.13	ZC3H6	2			0	100	100	0.396	1.96	100	6.64	6.64	-1.34	0.97	6.64	4.12715e-16	3.81902e-16	0.077334	0.676602	3.35161e-16			19.08	121.71
FALSE	High	Master Protein	P11802	Cyclin-dependent kinase 4 OS=Homo sapiens OX=9606 GN=CDK4 PE=1 SV=2	0	FALSE	34.308	31	6	24	5	1	303	33.7	7.01	72.02	6	cell division;cell organization and biogenesis;development;metabolic process;regulation of biological process;response to stimulus	chromosome;cytoplasm;cytosol;membrane;nucleus	catalytic activity;enzyme regulator activity;nucleotide binding;protein binding	Pf00069, Pf01636, Pf07714	1019	ENSG00000135446.16	CDK4	12	Viral carcinogenesis; T cell receptor signaling pathway; Tight junction; Hepatitis B; Pancreatic cancer; Chronic myeloid leukemia; Non-small cell lung cancer; Breast cancer; Pathways in cancer; Glioma; AGE-RAGE signaling pathway in diabetic complications; Melanoma; HTLV-I infection; p53 signaling pathway; Measles; Small cell lung cancer; Bladder cancer; Cell cycle; Endocrine resistance; PI3K-Akt …	Signaling Pathways in Glioblastoma; DNA Damage Response; Retinoblastoma (RB) in Cancer; Cell Cycle; Ovarian Infertility Genes; T-Cell antigen Receptor (TCR) pathway during Staphylococcus aureus infection; Spinal Cord Injury; miRNA Regulation of DNA Damage Response; Bladder Cancer; Human Thyroid Stimulating Hormone (TSH) signaling pathway; G1 to S cell cycle control; H19 action Rb-E2F1 signaling a…	0	1.032	0.631	1.374	1.959	1.496	0.05	-0.66	0.46	0.97	0.58	0.988948	0.757864	0.827574	0.135205	0.701126	52.99	23.68	43.2	62.1	42.42	89.2
TRUE	High	Master Protein	P24821	Tenascin OS=Homo sapiens OX=9606 GN=TNC PE=1 SV=3	0	FALSE	9.368	1	2	2	2	1	2201	240.7	4.89	6.12	2	cell communication;cell differentiation;cell organization and biogenesis;metabolic process;regulation of biological process;response to stimulus	extracellular;membrane;organelle lumen	protein binding	Pf00041, Pf00147, Pf07974	3371	ENSG00000041982.15	TNC	9	MicroRNAs in cancer; Focal adhesion; ECM-receptor interaction; PI3K-Akt signaling pathway	Focal Adhesion-PI3K-Akt-mTOR-signaling pathway; Amplification and Expansion of Oncogenic Pathways as Metastatic Traits; Focal Adhesion; TGF-B Signaling in Thyroid Cells for Epithelial-Mesenchymal Transition; TGF-beta Signaling Pathway	0	0.911	0.55	1.16	1.958	0.198	-0.13	-0.86	0.21	0.97	-2.34	0.907008	0.191978	0.94756	0.00211047	7.49789e-13	22.94	23.07	143.06	144.83	15.94	152.5
FALSE	High	Master Protein	Q14004	Cyclin-dependent kinase 13 OS=Homo sapiens OX=9606 GN=CDK13 PE=1 SV=2	0	FALSE	14.532	3	3	22	1	1	1512	164.8	9.69	49.28	3	cell division;development;metabolic process;regulation of biological process;transport	chromosome;cytosol;extracellular;Golgi;nucleus	catalytic activity;DNA binding;nucleotide binding;protein binding;RNA binding	Pf00069, Pf07714	8621	ENSG00000065883.14	CDK13	7			0	0.896	0.781	1.537	1.958	1.316	-0.16	-0.36	0.62	0.97	0.4	0.954606	0.973826	0.827947	0.597789	0.929578	29.06	30.29	47.64	46.1	38.7	98.2
FALSE	Medium	Master Protein	Q9UGJ1	Gamma-tubulin complex component 4 OS=Homo sapiens OX=9606 GN=TUBGCP4 PE=1 SV=1	0.017	FALSE	2.768	2	1	1	1	1	667	76	6.65	0	1	cell organization and biogenesis	cytoplasm;cytoskeleton;cytosol;endosome;membrane	protein binding;structural molecule activity	Pf04130	27229	ENSG00000137822.12	TUBGCP4	15			0	0.969	0.572	1.22	1.955	1.238	-0.05	-0.81	0.29	0.97	0.31	0.986602	0.790771	0.985659	0.569428	0.965371	38.93	5.19	19.35	49.6	59.14	132.7
FALSE	High	Master Protein	Q86UV5	Ubiquitin carboxyl-terminal hydrolase 48 OS=Homo sapiens OX=9606 GN=USP48 PE=1 SV=1	0	FALSE	38.498	11	8	22	8	1	1035	119	6.05	56.68	8	metabolic process	cytoplasm;cytosol;mitochondrion;nucleus	catalytic activity;protein binding	Pf00240, Pf00443, Pf06337, Pf13423	84196	ENSG00000090686.15	USP48	1			0	0.876	0.718	1.345	1.953	1.009	-0.19	-0.48	0.43	0.97	0.01	0.853978	0.82333	0.755417	0.0255105	0.996391	47.97	65.78	55.82	98.09	80.36	151.6
FALSE	High	Master Protein	P31350	Ribonucleoside-diphosphate reductase subunit M2 OS=Homo sapiens OX=9606 GN=RRM2 PE=1 SV=1	0	FALSE	59.027	30	10	49	9	1	389	44.8	5.38	154.11	10	metabolic process;regulation of biological process	cytoplasm;cytosol	catalytic activity;metal ion binding;protein binding	Pf00268	6241	ENSG00000171848.13	RRM2	2	Glutathione metabolism; Purine metabolism; p53 signaling pathway; Metabolic pathways; Pyrimidine metabolism	Nucleotide Metabolism; Fluoropyrimidine Activity; Hepatitis C and Hepatocellular Carcinoma; Retinoblastoma (RB) in Cancer	1	0.841	0.719	1.676	1.951	1.356	-0.25	-0.48	0.74	0.96	0.44	0.617597	0.82333	0.050894	0.000192846	0.420309	29.17	32.61	56.51	76.63	50.29	94.8
FALSE	High	Master Protein	Q92604	Acyl-CoA:lysophosphatidylglycerol acyltransferase 1 OS=Homo sapiens OX=9606 GN=LPGAT1 PE=1 SV=1	0.002	FALSE	4.592	3	1	3	1	1	370	43.1	8.92	8.15	1	metabolic process;regulation of biological process	cytoplasm;endoplasmic reticulum;membrane	catalytic activity	Pf01553	9926	ENSG00000123684.12	LPGAT1	1	Glycerophospholipid metabolism		0	0.89	0.791	1.728	1.945	1.538	-0.17	-0.34	0.79	0.96	0.62	0.929248	0.945294	0.48154	0.287513	0.71983	34.55	29.06	25.23	16.47	48.25	94.8
FALSE	High	Master Protein	Q15633	RISC-loading complex subunit TARBP2 OS=Homo sapiens OX=9606 GN=TARBP2 PE=1 SV=3	0	FALSE	9.295	8	2	3	2	1	366	39	6.54	8.56	2	cell organization and biogenesis;metabolic process;regulation of biological process;response to stimulus	cytoplasm;cytosol;nucleus	protein binding;RNA binding	Pf00035, Pf14709	6895	ENSG00000139546.10	TARBP2	12			0	0.704	0.699	2.494	1.94	1.172	-0.51	-0.52	1.32	0.96	0.23	0.688668	0.928915	0.0780866	0.27928	0.975532	10.21	28.35	66.17	73.45	81.35	51.1
FALSE	Medium	None	Q3MIR4	Cell cycle control protein 50B OS=Homo sapiens OX=9606 GN=TMEM30B PE=1 SV=1	0.035	FALSE	2.174	2	1	4	1	1	351	38.9	7.88	6.71	1	regulation of biological process;transport	membrane	protein binding;transporter activity	Pf03381	161291	ENSG00000182107.6	TMEM30B	14			0	1.515	0.444	0.568	1.94	0.861	0.6	-1.17	-0.81	0.96	-0.22	0.368569	0.453791	0.348926	0.583517	0.936222	79.58	1.84	27.39	0	6.92	104.7
FALSE	Medium	Master Protein	O00422	Histone deacetylase complex subunit SAP18 OS=Homo sapiens OX=9606 GN=SAP18 PE=1 SV=1	0.01	FALSE	3.172	9	2	6	2	1	153	17.6	9.35	8.75	2	cell organization and biogenesis;metabolic process;regulation of biological process	cytoplasm;cytosol;nucleus	catalytic activity;protein binding;RNA binding	Pf06487	10284	ENSG00000150459.12	SAP18	13	mRNA surveillance pathway; RNA transport	Hedgehog Signaling Pathway	0	0.907	0.652	1.198	1.935	1.105	-0.14	-0.62	0.26	0.95	0.14	0.934043	0.744539	0.985712	0.277653	0.989349	27.33	25.13	40.9	66.58	22.95	126.5
FALSE	Medium	Master Protein	Q9NUD5	Zinc finger CCHC domain-containing protein 3 OS=Homo sapiens OX=9606 GN=ZCCHC3 PE=1 SV=2	0.035	FALSE	2.16	3	1	1	1	1	403	43.5	8.53	0	1											0	0.798	0.371	0.873	1.934	0.711	-0.32	-1.43	-0.2	0.95	-0.49	0.912649	0.371529	0.970229	0.745599	0.870293	12.99	9.36	20.81	63.43	9.18	138.9
FALSE	High	Master Protein	Q9H9Y4	GPN-loop GTPase 2 OS=Homo sapiens OX=9606 GN=GPN2 PE=1 SV=2	0.001	FALSE	6.476	11	1	6	1	1	310	34.5	5.25	12.42	1	metabolic process	cytoplasm	catalytic activity;nucleotide binding	Pf01656, Pf03029, Pf03205, Pf03266, Pf03308, Pf12846, Pf13207, Pf13614	54707	ENSG00000142751.14	GPN2	1			0	0.719	0.573	1.538	1.927	1.105	-0.48	-0.8	0.62	0.95	0.14	0.793705	0.8116	0.816691	0.670587	0.983377	13.77	3.73	28.88	6.22	11.82	117.8
FALSE	High	None	P0CG22	Putative dehydrogenase/reductase SDR family member 4-like 1 OS=Homo sapiens OX=9606 GN=DHRS4L1 PE=5 SV=1	0	FALSE	6.652	7	2	7	2	1	281	30.6	9.77	16.46	2	metabolic process		catalytic activity	Pf00106, Pf13561	728635		DHRS4L1	14			0	0.818	0.945	1.357	1.924	0.996	-0.29	-0.08	0.44	0.94	-0.01	0.759493	0.999876	0.875111	0.282868	0.987913	67.38	3.33	87.67	77.84	80.12	106.4
FALSE	Medium	Master Protein	Q4KWH8	1-phosphatidylinositol 4,5-bisphosphate phosphodiesterase eta-1 OS=Homo sapiens OX=9606 GN=PLCH1 PE=1 SV=1	0.014	FALSE	2.936	0	1	23	1	1	1693	189.1	7.74	46.52	1	metabolic process;regulation of biological process;response to stimulus	cytoplasm;cytosol;membrane	catalytic activity;metal ion binding;protein binding;signal transducer activity	Pf00036, Pf00168, Pf00387, Pf00388, Pf09279, Pf13499, Pf14788	23007	ENSG00000114805.16	PLCH1	3	Inositol phosphate metabolism; Metabolic pathways	GPR40 PATHWAY; Mesodermal Commitment Pathway	0	1.221	1.128	1.251	1.92	2.137	0.29	0.17	0.32	0.94	1.1	0.606108	0.941119	0.862983	0.024159	0.0310309	30.3	12.69	76.42	16.88	38.08	74.8
FALSE	High	None	Q6ZMV9	Kinesin-like protein KIF6 OS=Homo sapiens OX=9606 GN=KIF6 PE=1 SV=3	0.001	FALSE	6.156	1	1	10	0	3	814	92.5	6.93	23.6	1	cellular component movement	cytoplasm;cytoskeleton;nucleus	catalytic activity;motor activity;nucleotide binding;protein binding	Pf00225	221458	ENSG00000164627.17	KIF6	6			0	0.889	0.557	1.201	1.917	1.068	-0.17	-0.84	0.26	0.94	0.1	0.92028	0.539393	0.985659	0.292945	0.993894	15.04	15.24	12.16	59.5	19.6	113.8
FALSE	High	None	O00308	NEDD4-like E3 ubiquitin-protein ligase WWP2 OS=Homo sapiens OX=9606 GN=WWP2 PE=1 SV=2	0.003	FALSE	4.098	1	1	1	1	1	870	98.9	7.12	2.53	1	metabolic process;regulation of biological process;transport	cytoplasm;cytosol;membrane;nucleus	catalytic activity;protein binding	Pf00168, Pf00397, Pf00632	11060	ENSG00000198373.12	WWP2	16	Ubiquitin mediated proteolysis		0	2.106	0.886	0.805	1.914	1.696	1.07	-0.18	-0.31	0.94	0.76	9.34576e-06	0.999876	0.829796	0.252125	0.458636	0	14.12	0	18.01	0	70.3
FALSE	High	None	Q9H0M0	NEDD4-like E3 ubiquitin-protein ligase WWP1 OS=Homo sapiens OX=9606 GN=WWP1 PE=1 SV=1	0	FALSE	9.203	2	2	3	2	1	922	105.1	5.9	4.98	2	metabolic process;regulation of biological process;response to stimulus;transport	cytoplasm;cytosol;membrane;nucleus	catalytic activity;protein binding	Pf00168, Pf00397, Pf00632	11059	ENSG00000123124.13	WWP1	8	Endocytosis; Ubiquitin mediated proteolysis	TGF-beta Signaling Pathway	0	0.994	0.886	0.805	1.914	0.808	-0.01	-0.18	-0.31	0.94	-0.31	0.992692	0.999876	0.831123	0.252125	0.853525	35.26	14.12	44.39	18.01	57.6	97.2
FALSE	High	Master Protein	P41236	Protein phosphatase inhibitor 2 OS=Homo sapiens OX=9606 GN=PPP1R2 PE=1 SV=2	0	FALSE	16.605	18	2	7	2	1	205	23	4.74	20.13	2	metabolic process;regulation of biological process	cytosol	enzyme regulator activity;protein binding	Pf04979	5504	ENSG00000184203.7	PPP1R2	3			0	0.592	0.54	0.862	1.913	0.753	-0.76	-0.89	-0.21	0.94	-0.41	0.0747787	0.463339	0.968301	0.758789	0.853525	28.78	31.72	45.67	105.68	39.05	273.7
FALSE	Medium	Master Protein	Q8TBN0	Guanine nucleotide exchange factor for Rab-3A OS=Homo sapiens OX=9606 GN=RAB3IL1 PE=1 SV=1	0.018	FALSE	2.694	3	1	1	1	1	382	42.6	6.47	0	1	transport	cytosol	protein binding	Pf06428	5866	ENSG00000167994.11	RAB3IL1	11			0	0.888	0.892	1.92	1.912	1.705	-0.17	-0.16	0.94	0.93	0.77	0.968798	0.999876	0.497647	0.703905	0.715295	25.37	39.68	34.14	52.93	8.8	89.2
FALSE	High	Master Protein	Q9H081	Protein MIS12 homolog OS=Homo sapiens OX=9606 GN=MIS12 PE=1 SV=1	0.001	FALSE	6.056	7	1	2	1	1	205	24.1	5.69	6.9	1	cell division;cell organization and biogenesis	chromosome;cytosol;nucleus	protein binding	Pf05859	79003	ENSG00000167842.15	MIS12	17			0	0.919	0.992	2.235	1.911	1.716	-0.12	-0.01	1.16	0.93	0.78	0.954606	0.999876	0.254186	0.380865	0.714165	50.86	44	56.32	75.26	66.23	75.2
FALSE	High	Master Protein	Q5UCC4	ER membrane protein complex subunit 10 OS=Homo sapiens OX=9606 GN=EMC10 PE=1 SV=1	0	FALSE	6.542	7	1	4	1	1	262	27.3	6.13	19.74	1		extracellular;membrane			284361	ENSG00000161671.16	EMC10	19			0	1.258	0.72	1.092	1.908	1.373	0.33	-0.47	0.13	0.93	0.46	0.548998	0.909763	0.988797	0.0546435	0.752475	0	0	0	0	0	91.9
FALSE	Low	Master Protein	Q99466	Neurogenic locus notch homolog protein 4 OS=Homo sapiens OX=9606 GN=NOTCH4 PE=1 SV=2	0.073	FALSE	1.635	1	1	3	1	1	2003	209.5	5.73	0	1	cell differentiation;cell organization and biogenesis;development;metabolic process;regulation of biological process;response to stimulus	cell surface;cytosol;extracellular;membrane;nucleus	metal ion binding;protein binding;receptor activity	Pf00008, Pf00023, Pf00066, Pf07645, Pf07684, Pf12796, Pf13606, Pf13637, Pf13830, Pf13857	4855	ENSG00000234876.5; ENSG00000204301.6	NOTCH4	6; CHR_HSCHR6_MHC_SSTO_CTG1	Dorso-ventral axis formation; MicroRNAs in cancer; Breast cancer; Thyroid hormone signaling pathway; Notch signaling pathway; Endocrine resistance	VEGFA-VEGFR2 Signaling Pathway; Role of Osx and miRNAs in tooth development; Neural Crest Differentiation; Notch Signaling Pathway; Canonical and Non-canonical Notch signaling; Notch Signaling Pathway	0	0.875	0.646	1.653	1.902	1.195	-0.19	-0.63	0.73	0.93	0.26	0.934025	0.869684	0.740708	0.481399	0.97414	44.12	16.11	51.87	11.73	38.47	112.2
FALSE	Low	Master Protein	Q9Y2Q5	Ragulator complex protein LAMTOR2 OS=Homo sapiens OX=9606 GN=LAMTOR2 PE=1 SV=1	0.056	FALSE	1.816	14	1	4	1	1	125	13.5	5.4	12.68	1	metabolic process;regulation of biological process;response to stimulus;transport	endosome;membrane;vacuole	protein binding;structural molecule activity	Pf03259	28956	ENSG00000116586.11	LAMTOR2	1	mTOR signaling pathway		0	1.416	0.818	1.128	1.9	1.59	0.5	-0.29	0.17	0.93	0.67	0.208473	0.969333	0.988797	0.239776	0.593317	76.43	55.25	143.1	142.37	124.54	80
FALSE	High	Master Protein	Q14807	Kinesin-like protein KIF22 OS=Homo sapiens OX=9606 GN=KIF22 PE=1 SV=5	0.002	FALSE	4.565	3	1	6	1	1	665	73.2	9.45	6.87	1	cell organization and biogenesis;cellular component movement;metabolic process;response to stimulus;transport	chromosome;cytoplasm;cytoskeleton;cytosol;nucleus	catalytic activity;DNA binding;motor activity;nucleotide binding;protein binding	Pf00225, Pf12836	3835	ENSG00000079616.12	KIF22	16			0	0.788	0.554	1.302	1.899	0.793	-0.34	-0.85	0.38	0.93	-0.33	0.820968	0.729332	0.94153	0.447553	0.897805	22.74	10.07	36.56	47.61	25.2	126.9
FALSE	High	Master Protein	Q9H6D7	HAUS augmin-like complex subunit 4 OS=Homo sapiens OX=9606 GN=HAUS4 PE=1 SV=1	0	FALSE	7.874	7	2	13	2	1	363	42.4	5.68	14.11	2	cell division;cell organization and biogenesis;regulation of biological process	cytoplasm;cytoskeleton;cytosol	protein binding	Pf14735	54930	ENSG00000092036.18	HAUS4	14			0	1.074	0.541	0.782	1.899	1.074	0.1	-0.89	-0.35	0.93	0.1	0.963379	0.462741	0.860396	0.354363	0.995752	20.62	12.28	25.55	47.04	44.2	106.9
FALSE	High	Master Protein	Q5VU43	Myomegalin OS=Homo sapiens OX=9606 GN=PDE4DIP PE=1 SV=3	0.001	FALSE	5.833	1	2	14	1	1	2346	264.9	5.47	16.89	2											0	0.01	0.86	100	1.898	1.817	-6.64	-0.22	6.64	0.92	0.86	4.12715e-16	0.999876	3.26911e-16	0.371512	0.676119		19.75		34.27	30.78	114.5
TRUE	High	Master Protein	Q92844	TRAF family member-associated NF-kappa-B activator OS=Homo sapiens OX=9606 GN=TANK PE=1 SV=2	0	FALSE	34.143	23	5	6	5	1	425	47.8	5.68	26.45	5	metabolic process;regulation of biological process;response to stimulus	cytoplasm;cytosol	catalytic activity;enzyme regulator activity;metal ion binding;protein binding	Pf12845	10010	ENSG00000136560.13	TANK	2	NOD-like receptor signaling pathway; RIG-I-like receptor signaling pathway	RIG-I-like Receptor Signaling; TNF alpha Signaling Pathway; Structural Pathway of Interleukin 1 (IL-1)	0	0.513	0.137	0.423	1.898	0.33	-0.96	-2.87	-1.24	0.92	-1.6	0.0812731	5.0155e-05	0.163888	0.623346	0.0181092	33.1	2.64	6.66	95.61	6.61	221.9
FALSE	High	Master Protein	P38435	Vitamin K-dependent gamma-carboxylase OS=Homo sapiens OX=9606 GN=GGCX PE=1 SV=2	0.001	FALSE	5.39	2	1	1	1	1	758	87.5	8.02	2.27	1	coagulation;metabolic process	endoplasmic reticulum;membrane	catalytic activity	Pf05090	2677	ENSG00000115486.11	GGCX	2	Ubiquinone and other terpenoid-quinone biosynthesis		0	1.46	0.792	1.029	1.896	1.502	0.55	-0.34	0.04	0.92	0.59	0.395971	0.956686	0.999922	0.315292	0.829179	61	10.09	51.34	39.73	38.96	84.1
FALSE	High	Master Protein	P21741	Midkine OS=Homo sapiens OX=9606 GN=MDK PE=1 SV=1	0	FALSE	20.171	31	4	24	4	1	143	15.6	9.79	30.39	4	cell differentiation;cellular component movement;defense response;development;regulation of biological process;response to stimulus	cytoplasm;extracellular	protein binding	Pf01091, Pf05196	4192	ENSG00000110492.15	MDK	11			0	1.134	0.54	1.046	1.892	1.411	0.18	-0.89	0.06	0.92	0.5	0.899112	0.488085	0.999922	0.328861	0.823016	80.23	24.91	51.98	90.23	80.01	76.6
FALSE	High	None	Q86WG3	Caytaxin OS=Homo sapiens OX=9606 GN=ATCAY PE=1 SV=2	0.005	FALSE	3.876	3	1	1	1	1	371	42.1	4.65	0	1	cell organization and biogenesis;regulation of biological process;transport	cytoplasm;membrane;mitochondrion	protein binding	Pf00650, Pf12496, Pf13716	85300	ENSG00000167654.17	ATCAY	19			0	0.859	0.878	1.936	1.892	1.662	-0.22	-0.19	0.95	0.92	0.73	0.941008	0.999876	0.508331	0.652529	0.754321	0	0	0	0	0	90.9
FALSE	High	Master Protein	Q99538	Legumain OS=Homo sapiens OX=9606 GN=LGMN PE=1 SV=1	0	FALSE	29.963	14	4	17	4	1	433	49.4	6.55	78.39	4	metabolic process;regulation of biological process;response to stimulus	endosome;organelle lumen;vacuole	catalytic activity	Pf01650	5641	ENSG00000100600.14	LGMN	14	Lysosome; Antigen processing and presentation		0	1.888	0.913	0.825	1.887	1.352	0.92	-0.13	-0.28	0.92	0.44	9.68175e-10	0.999876	0.722622	0.00588228	0.741902	86.57	43.39	80.31	92.17	111.79	81.4
FALSE	High	Master Protein	P11047	Laminin subunit gamma-1 OS=Homo sapiens OX=9606 GN=LAMC1 PE=1 SV=3	0	FALSE	88.915	18	17	52	17	1	1609	177.5	5.12	111.43	17	cell organization and biogenesis;cellular component movement;metabolic process;regulation of biological process	extracellular;organelle lumen	catalytic activity;motor activity;protein binding;structural molecule activity	Pf00052, Pf00053, Pf00055, Pf00261, Pf01576, Pf05262, Pf05483, Pf05557, Pf05667, Pf05701, Pf06008, Pf08317, Pf10174, Pf11068, Pf12128, Pf12795, Pf13166, Pf13514, Pf13868	3915	ENSG00000135862.5	LAMC1	1	Amoebiasis; Prion diseases; Pathways in cancer; Toxoplasmosis; Focal adhesion; Small cell lung cancer; ECM-receptor interaction; PI3K-Akt signaling pathway	Inflammatory Response Pathway; Alpha 6 Beta 4 signaling pathway; Focal Adhesion-PI3K-Akt-mTOR-signaling pathway; Endoderm Differentiation; Focal Adhesion; miRNA targets in ECM and membrane receptors	0	1.264	0.844	1.322	1.885	1.578	0.34	-0.25	0.4	0.91	0.66	0.0497694	0.982784	0.624971	0.00059572	0.115283	41.31	42.02	36.18	52.73	45.36	91.8
FALSE	High	None	Q9Y3S1	Serine/threonine-protein kinase WNK2 OS=Homo sapiens OX=9606 GN=WNK2 PE=1 SV=4	0.003	FALSE	4.216	0	1	1	1	1	2297	242.5	6.13	1.98	1	metabolic process;regulation of biological process;response to stimulus	cytoplasm;cytosol;membrane	catalytic activity;nucleotide binding	Pf00069, Pf07714, Pf12202	65268	ENSG00000165238.16	WNK2	9			0	0.801	0.711	1.318	1.883	1.285	-0.32	-0.49	0.4	0.91	0.36	0.840309	0.928915	0.94153	0.425147	0.93838	10.38	7.32	41.38	43.5	43.9	105
FALSE	High	None	Q96J92	Serine/threonine-protein kinase WNK4 OS=Homo sapiens OX=9606 GN=WNK4 PE=1 SV=1	0.003	FALSE	4.216	1	1	1	1	1	1243	134.7	5.48	1.98	1	metabolic process;regulation of biological process;response to stimulus;transport	cytoplasm;cytosol;membrane	catalytic activity;nucleotide binding;protein binding	Pf00069, Pf07714, Pf12202	65266	ENSG00000126562.16	WNK4	17			0	0.801	0.711	1.318	1.883	1.285	-0.32	-0.49	0.4	0.91	0.36	0.840309	0.928915	0.94153	0.425147	0.93838	10.38	7.32	41.38	43.5	43.9	105
FALSE	High	Master Protein	P68402	Platelet-activating factor acetylhydrolase IB subunit beta OS=Homo sapiens OX=9606 GN=PAFAH1B2 PE=1 SV=1	0	FALSE	76.401	55	8	86	8	1	229	25.6	5.92	305.14	8	metabolic process;regulation of biological process;transport	cytoplasm;cytosol;extracellular;membrane;organelle lumen	catalytic activity;protein binding	Pf00657, Pf13472	5049	ENSG00000168092.13	PAFAH1B2	11	Ether lipid metabolism; Metabolic pathways		0	0.724	0.665	1.177	1.883	1.165	-0.47	-0.59	0.24	0.91	0.22	0.00271774	0.627724	0.869928	0.000286931	0.829179	42.56	44.14	89.48	101.43	84.3	155.9
FALSE	High	Master Protein	Q96AE7	Tetratricopeptide repeat protein 17 OS=Homo sapiens OX=9606 GN=TTC17 PE=1 SV=1	0.001	FALSE	5.3	1	1	2	1	1	1141	129.5	6.58	4.38	1	cell organization and biogenesis	cytoplasm;cytoskeleton;cytosol;membrane	catalytic activity;nucleotide binding;protein binding	Pf00515, Pf02841, Pf13414, Pf13424, Pf13432	55761	ENSG00000052841.14	TTC17	11			0	0.907	0.556	1.154	1.882	1.047	-0.14	-0.85	0.21	0.91	0.07	0.952508	0.763184	0.988797	0.65279	0.999969	0	0	53.25	53.25	53.25	113.9
FALSE	High	Master Protein	Q9BPZ7	Target of rapamycin complex 2 subunit MAPKAP1 OS=Homo sapiens OX=9606 GN=MAPKAP1 PE=1 SV=2	0.002	FALSE	4.488	2	1	1	1	1	522	59.1	7.55	2.89	1	cell organization and biogenesis;regulation of biological process;response to stimulus	cytosol;Golgi;membrane;nucleus	protein binding	Pf05422	79109	ENSG00000119487.16	MAPKAP1	9	mTOR signaling pathway	VEGFA-VEGFR2 Signaling Pathway; Target Of Rapamycin (TOR) Signaling; Angiopoietin Like Protein 8 Regulatory Pathway; Interferon type I signaling pathways	0	0.994	0.864	1.626	1.879	1.625	-0.01	-0.21	0.7	0.91	0.7	0.992092	0.999876	0.69847	0.345414	0.778671	59.11	56.11	29.7	2.13	74.05	89.2
FALSE	High	Master Protein	O75323	Protein NipSnap homolog 2 OS=Homo sapiens OX=9606 GN=NIPSNAP2 PE=1 SV=1	0	FALSE	59.696	47	9	49	9	1	286	33.7	9.36	147.63	9	metabolic process;regulation of biological process	cytoplasm;membrane;mitochondrion	protein binding	Pf07978	2631	ENSG00000146729.9	GBAS; NIPSNAP2	7			0	0.842	0.857	1.343	1.879	1.015	-0.25	-0.22	0.43	0.91	0.02	0.594242	0.999876	0.580673	0.00156672	0.995752	45.95	43.85	82.61	81.68	101.74	97.7
FALSE	High	Master Protein	Q86VI3	Ras GTPase-activating-like protein IQGAP3 OS=Homo sapiens OX=9606 GN=IQGAP3 PE=1 SV=2	0	FALSE	14.594	3	4	14	2	1	1631	184.6	7.65	30.51	4	cell organization and biogenesis;metabolic process;regulation of biological process;response to stimulus	cytoplasm;cytosol	protein binding	Pf00307, Pf00612, Pf00616, Pf03836	128239	ENSG00000183856.10	IQGAP3	1	Regulation of actin cytoskeleton		0	1.666	0.823	0.927	1.877	1.544	0.74	-0.28	-0.11	0.91	0.63	0.337767	0.992766	0.988797	0.481662	0.852747	67.09	0	57.65	0	0	79.5
FALSE	High	Master Protein	Q01658	Protein Dr1 OS=Homo sapiens OX=9606 GN=DR1 PE=1 SV=1	0	FALSE	15.246	21	2	15	2	1	176	19.4	4.75	59.96	2	cell organization and biogenesis;metabolic process;regulation of biological process	nucleus	DNA binding;protein binding	Pf00808	1810	ENSG00000117505.12	DR1	1			0	1.225	0.753	0.891	1.875	1.211	0.29	-0.41	-0.17	0.91	0.28	0.208239	0.911346	0.875111	0.00142405	0.82693	49.47	32.08	32.31	68.37	63.6	93.1
FALSE	High	Master Protein	P49459	Ubiquitin-conjugating enzyme E2 A OS=Homo sapiens OX=9606 GN=UBE2A PE=1 SV=2	0	FALSE	19.839	33	2	18	1	1	152	17.3	5.15	49.08	2	cell organization and biogenesis;metabolic process;regulation of biological process;response to stimulus	chromosome;cytoplasm;cytosol	catalytic activity;nucleotide binding;protein binding	Pf00179, Pf14461	7319	ENSG00000077721.15	UBE2A	X	Ubiquitin mediated proteolysis		0	0.787	0.611	1.45	1.87	1.142	-0.34	-0.71	0.54	0.9	0.19	0.695451	0.626729	0.8037	0.327047	0.971921	0	0	0	0	0	113
FALSE	High	Master Protein	Q8N2S1	Latent-transforming growth factor beta-binding protein 4 OS=Homo sapiens OX=9606 GN=LTBP4 PE=1 SV=2	0	FALSE	10.928	2	2	4	2	1	1624	173.3	5.43	4.99	2	development;metabolic process;regulation of biological process;response to stimulus;transport	extracellular	catalytic activity;metal ion binding;protein binding;receptor activity;signal transducer activity	Pf00683, Pf07645, Pf12662, Pf12947	8425	ENSG00000090006.17	LTBP4	19			0	1.122	0.642	1.204	1.867	1.04	0.17	-0.64	0.27	0.9	0.06	0.934025	0.866246	0.985659	0.495958	0.995752	34.22	5.73	35.34	35.86	25.8	109
FALSE	Medium	Master Protein	Q15652	Probable JmjC domain-containing histone demethylation protein 2C OS=Homo sapiens OX=9606 GN=JMJD1C PE=1 SV=2	0.024	FALSE	2.465	1	1	1	1	1	2540	284.3	7.87	0	1	cell organization and biogenesis;coagulation;metabolic process;regulation of biological process	chromosome;nucleus	catalytic activity;DNA binding;metal ion binding;protein binding	Pf02373	221037	ENSG00000171988.18	JMJD1C	10	Transcriptional misregulation in cancer	Pathways Affected in Adenoid Cystic Carcinoma	0	3.126	1.182	0.978	1.854	2.503	1.64	0.24	-0.03	0.89	1.32	0.00479921	0.915351	0.99306	0.776234	0.189076	71.8	85.72	58.44	94.51	67.02	40.7
FALSE	Low	Master Protein	Q58F21	Bromodomain testis-specific protein OS=Homo sapiens OX=9606 GN=BRDT PE=1 SV=4	0.087	FALSE	1.481	1	1	1	1	1	947	107.9	8.95	0	1	cell differentiation;cell organization and biogenesis;metabolic process;regulation of biological process	nucleus	protein binding	Pf00439	676	ENSG00000137948.18	BRDT	1			0	1.269	0.892	1.303	1.853	1.653	0.34	-0.16	0.38	0.89	0.73	0.844754	0.999876	0.963796	0.678488	0.761027	42.72	25.98	71.85	77.11	90.49	83.1
FALSE	High	Master Protein	Q9NVP2	Histone chaperone ASF1B OS=Homo sapiens OX=9606 GN=ASF1B PE=1 SV=1	0	FALSE	39.46	62	6	24	5	1	202	22.4	4.56	87.18	6	cell differentiation;cell organization and biogenesis;development;metabolic process;regulation of biological process	chromosome;nucleus	protein binding	Pf04729	55723	ENSG00000105011.8	ASF1B	19			0	1.06	0.664	1.13	1.848	1.184	0.08	-0.59	0.18	0.89	0.24	0.912649	0.67215	0.966793	0.0108779	0.882862	46.18	31.09	50.56	63.83	37.85	110.6
FALSE	High	Master Protein	Q9BRQ6	MICOS complex subunit MIC25 OS=Homo sapiens OX=9606 GN=CHCHD6 PE=1 SV=1	0	FALSE	29.071	24	3	14	3	1	235	26.4	8.85	60.85	3	cell organization and biogenesis;response to stimulus	cytosol;membrane;mitochondrion	protein binding	Pf05300	84303	ENSG00000159685.10	CHCHD6	3			0	0.777	0.838	1.397	1.848	1.232	-0.36	-0.25	0.48	0.89	0.3	0.52957	0.973826	0.624573	0.0292764	0.876247	39.98	19.53	43.02	63.22	78.74	85.4
FALSE	Low	Master Protein	C9J3I9	Putative uncharacterized protein C5orf58 OS=Homo sapiens OX=9606 GN=C5orf58 PE=4 SV=1	0.061	FALSE	1.746	10	1	2	1	1	102	11.7	7.43	0	1					133874	ENSG00000234511.8	C5orf58	5			0	0.633	1.577	4.595	1.846	2.91	-0.66	0.66	2.2	0.88	1.54	0.530227	0.682216	0.00121933	0.522983	0.142652	0	0	0	0	0	65.4
FALSE	High	Master Protein	Q9H9F9	Actin-related protein 5 OS=Homo sapiens OX=9606 GN=ACTR5 PE=1 SV=2	0	FALSE	21.642	12	4	9	4	1	607	68.3	5.27	27.4	4	metabolic process;regulation of biological process;response to stimulus	cytoplasm;nucleus	protein binding	Pf00022, Pf07564	79913	ENSG00000101442.9	ACTR5	20			0	1.191	0.788	0.894	1.845	1.08	0.25	-0.34	-0.16	0.88	0.11	0.725446	0.962137	0.959036	0.352427	0.993441	33.24	27.17	43.97	55.36	48.04	80.9
FALSE	High	Master Protein Candidate	P0CG48	Polyubiquitin-C OS=Homo sapiens OX=9606 GN=UBC PE=1 SV=3	0	FALSE	52.661	78	7	301	1	1	685	77	7.66	732.63	7	cell communication;cell organization and biogenesis;cellular homeostasis;defense response;metabolic process;regulation of biological process;response to stimulus;transport	cytoplasm;cytosol;membrane;nucleus	catalytic activity;protein binding;RNA binding	Pf00240, Pf11976, Pf13019, Pf13881, Pf14560	7316	ENSG00000150991.14	UBC	12	PPAR signaling pathway	DNA Replication; Proteasome Degradation	0	1.046	0.488	0.767	1.844	0.802	0.07	-1.03	-0.38	0.88	-0.32	0.986042	0.593443	0.8952	0.694366	0.91238	46.93	14.7	22.63	75.96	32.75	130.6
FALSE	High	Master Protein	P0CG47	Polyubiquitin-B OS=Homo sapiens OX=9606 GN=UBB PE=1 SV=1	0	FALSE	52.661	76	7	301	1	1	229	25.7	7.43	732.63	7	cell communication;cell organization and biogenesis;cellular component movement;cellular homeostasis;defense response;metabolic process;regulation of biological process;response to stimulus;transport	cytoplasm;cytosol;membrane;mitochondrion;nucleus	protein binding	Pf00240, Pf11976, Pf13019, Pf13881, Pf14560	7314	ENSG00000170315.13	UBB	17	Parkinson's disease	Proteasome Degradation; Dual hijack model of Vif in HIV infection; Parkinsons Disease Pathway	0	1.046	0.488	0.767	1.844	0.802	0.07	-1.03	-0.38	0.88	-0.32	0.986042	0.593443	0.8952	0.694366	0.91238	46.93	14.7	22.63	75.96	32.75	130.6
FALSE	High	Master Protein	A6NKD9	Coiled-coil domain-containing protein 85C OS=Homo sapiens OX=9606 GN=CCDC85C PE=1 SV=1	0	FALSE	22.658	13	5	8	5	1	419	45.2	6.96	21.93	5	development			Pf10226	317762	ENSG00000205476.8	CCDC85C	14			0	1.083	0.669	1.146	1.843	1.08	0.11	-0.58	0.2	0.88	0.11	0.961148	0.898403	0.988797	0.637821	0.996722	35.95	27.8	80.66	89.62	28.63	112.8
FALSE	High	Master Protein	Q8IZ21	Phosphatase and actin regulator 4 OS=Homo sapiens OX=9606 GN=PHACTR4 PE=1 SV=1	0	FALSE	9.078	7	3	5	3	1	702	78.2	6.62	6.3	3	cell organization and biogenesis;cellular component movement;development;regulation of biological process;response to stimulus	cytoplasm	enzyme regulator activity;protein binding	Pf02755	65979	ENSG00000204138.12	PHACTR4	1			0	0.899	0.847	1.601	1.841	1.503	-0.15	-0.24	0.68	0.88	0.59	0.951822	0.996742	0.722622	0.387897	0.841828	57.51	39.1	62.68	56.55	64.38	79.3
FALSE	High	Master Protein	P28370	Probable global transcription activator SNF2L1 OS=Homo sapiens OX=9606 GN=SMARCA1 PE=1 SV=2	0	FALSE	33.195	8	8	19	1	1	1054	122.5	8.09	31.86	8	cell differentiation;cell organization and biogenesis;metabolic process;regulation of biological process	nucleus	catalytic activity;DNA binding;nucleotide binding;protein binding	Pf00176, Pf00270, Pf00271, Pf04851, Pf09110, Pf09111, Pf11496, Pf13892	6594	ENSG00000102038.15	SMARCA1	X			0	0.883	0.583	1.27	1.84	1.075	-0.18	-0.78	0.35	0.88	0.1	0.931016	0.791156	0.94153	0.415914	0.995752	9.85	17.31	8.48	47.9	4.72	114.3
FALSE	High	Master Protein	Q8NHV4	Protein NEDD1 OS=Homo sapiens OX=9606 GN=NEDD1 PE=1 SV=1	0	FALSE	10.856	8	3	6	3	1	660	71.9	7.97	8.02	3	cell division;regulation of biological process	cytoplasm;cytoskeleton;cytosol	protein binding	Pf00400, Pf02239	121441	ENSG00000139350.11	NEDD1	12			0	1.011	0.551	1.461	1.839	1.248	0.02	-0.86	0.55	0.88	0.32	0.991154	0.737791	0.833466	0.645115	0.959546	35.5	1.92	48.59	67.23	42.51	129.5
FALSE	Medium	Master Protein	Q6ZNA5	Ferric-chelate reductase 1 OS=Homo sapiens OX=9606 GN=FRRS1 PE=2 SV=2	0.047	FALSE	1.951	1	1	6	1	1	592	66.1	7.47	3.37	1	metabolic process;transport	membrane	catalytic activity;metal ion binding	Pf02014, Pf03351	391059		FRRS1	1			0	0.986	0.539	0.944	1.838	1.023	-0.02	-0.89	-0.08	0.88	0.03	0.990311	0.481017	0.988797	0.433399	0.995752	24.47	10.87	29.43	58.39	33.02	112.5
FALSE	Medium	Master Protein	Q9NV66	S-adenosyl-L-methionine-dependent tRNA 4-demethylwyosine synthase OS=Homo sapiens OX=9606 GN=TYW1 PE=2 SV=2	0.012	FALSE	2.988	1	1	2	1	1	732	83.6	6.87	3.58	1	metabolic process		catalytic activity;metal ion binding;nucleotide binding	Pf00258, Pf04055, Pf08608	55253	ENSG00000198874.12	TYW1	7			0	0.833	0.501	1.106	1.838	0.921	-0.26	-1	0.15	0.88	-0.12	0.891331	0.611488	0.994978	0.644278	0.968664	33.53	8.41	42.23	53.68	37.51	122.9
FALSE	Medium	Master Protein Candidate	Q6NUM6	S-adenosyl-L-methionine-dependent tRNA 4-demethylwyosine synthase OS=Homo sapiens OX=9606 GN=TYW1B PE=2 SV=4	0.012	FALSE	2.988	1	1	2	1	1	668	76.9	6.27	3.58	1	metabolic process	membrane	catalytic activity;metal ion binding;nucleotide binding	Pf00258, Pf04055, Pf08608	441250	ENSG00000277149.4	TYW1B	7			0	0.833	0.501	1.106	1.838	0.921	-0.26	-1	0.15	0.88	-0.12	0.891331	0.611488	0.994978	0.644278	0.968664	33.53	8.41	42.23	53.68	37.51	122.9
FALSE	High	None	Q9NRU3	Metal transporter CNNM1 OS=Homo sapiens OX=9606 GN=CNNM1 PE=1 SV=3	0.002	FALSE	4.966	1	1	1	1	1	951	104.3	6.28	2.11	1	transport	membrane	protein binding	Pf01595	26507	ENSG00000119946.10	CNNM1	10			0	100	100	1.662	1.834	100	6.64	6.64	0.73	0.88	6.64	4.12715e-16	3.81902e-16	0.72479	0.556156	3.35161e-16			42.11	22.92
FALSE	High	None	P16520	Guanine nucleotide-binding protein G(I)/G(S)/G(T) subunit beta-3 OS=Homo sapiens OX=9606 GN=GNB3 PE=1 SV=1	0.002	FALSE	4.417	3	1	8	0	2	340	37.2	5.67	13.37	1	metabolic process;regulation of biological process;response to stimulus	cytosol;membrane	catalytic activity;protein binding;signal transducer activity	Pf00400	2784	ENSG00000111664.10	GNB3	12	Dopaminergic synapse; Serotonergic synapse; Glutamatergic synapse; Circadian entrainment; Morphine addiction; Pathways in cancer; Taste transduction; Retrograde endocannabinoid signaling; GABAergic synapse; Alcoholism; Ras signaling pathway; Chemokine signaling pathway; Cholinergic synapse; PI3K-Akt signaling pathway	Corticotropin-releasing hormone signaling pathway; Calcium Regulation in the Cardiac Cell; G Protein Signaling Pathways; Chemokine signaling pathway; Sudden Infant Death Syndrome (SIDS) Susceptibility Pathways; Myometrial Relaxation and Contraction Pathways; Focal Adhesion-PI3K-Akt-mTOR-signaling pathway	0	0.934	0.666	1.335	1.833	1.111	-0.1	-0.59	0.42	0.87	0.15	0.947443	0.735444	0.70924	0.0665111	0.964472	21.29	47.57	48.12	81.9	27.73	111.7
FALSE	High	Master Protein	Q15004	PCNA-associated factor OS=Homo sapiens OX=9606 GN=PCLAF PE=1 SV=1	0	FALSE	7.354	22	2	12	2	1	111	12	9.83	11.03	2	cell organization and biogenesis;metabolic process;regulation of biological process;response to stimulus	cytoplasm;nucleus	protein binding		9768	ENSG00000259316.10; ENSG00000166803.11	KIAA0101; PCLAF	15			0	0.743	0.534	1.471	1.833	1.181	-0.43	-0.9	0.56	0.87	0.24	0.749991	0.701671	0.816075	0.464413	0.97021	24.95	16.19	80.54	93.53	76.93	132.8
FALSE	High	Master Protein	Q13257	Mitotic spindle assembly checkpoint protein MAD2A OS=Homo sapiens OX=9606 GN=MAD2L1 PE=1 SV=1	0	FALSE	13.34	16	3	15	3	1	205	23.5	5.08	33.2	3	cell division;cell organization and biogenesis;metabolic process;regulation of biological process	chromosome;cytoplasm;cytoskeleton;cytosol;nucleus	protein binding	Pf02301	4085	ENSG00000164109.13	MAD2L1	4	Progesterone-mediated oocyte maturation; HTLV-I infection; Oocyte meiosis; Cell cycle	Cell Cycle	0	0.83	0.54	0.926	1.822	0.737	-0.27	-0.89	-0.11	0.87	-0.44	0.521698	0.221509	0.950482	0.0118853	0.649114	25.76	14.32	44.67	43.77	26.55	113.9
FALSE	High	Master Protein	Q68CZ6	HAUS augmin-like complex subunit 3 OS=Homo sapiens OX=9606 GN=HAUS3 PE=1 SV=1	0	FALSE	9.879	5	2	5	2	1	603	69.6	5.55	13.04	2	cell division;cell organization and biogenesis;regulation of biological process	cytoplasm;cytoskeleton;cytosol;mitochondrion	protein binding	Pf14932	79441	ENSG00000214367.7	HAUS3	4			0	0.747	0.874	1.874	1.82	1.501	-0.42	-0.19	0.91	0.86	0.59	0.728186	0.999876	0.490927	0.566339	0.876247	18.54	25.99	65.55	80.59	69.7	90.7
FALSE	High	None	P11388	DNA topoisomerase 2-alpha OS=Homo sapiens OX=9606 GN=TOP2A PE=1 SV=3	0	FALSE	7.625	1	2	2	2	1	1531	174.3	8.72	4.46	2	cell differentiation;cell division;cell organization and biogenesis;metabolic process;regulation of biological process;response to stimulus	chromosome;cytoplasm;nucleus	catalytic activity;DNA binding;metal ion binding;nucleotide binding;protein binding;RNA binding	Pf00204, Pf00521, Pf01751, Pf02518, Pf08070	7153	ENSG00000131747.14	TOP2A	17	Platinum drug resistance	Retinoblastoma (RB) in Cancer; Gastric Cancer Network 1; Gastric cancer network 2	0	0.671	0.371	1.237	1.819	1.058	-0.58	-1.43	0.31	0.86	0.08	0.528504	0.229097	0.974136	0.506399	0.997366	31.86	8.68	74.73	74.77	87.76	131.3
FALSE	High	Master Protein	Q96MW5	Conserved oligomeric Golgi complex subunit 8 OS=Homo sapiens OX=9606 GN=COG8 PE=1 SV=2	0	FALSE	12.715	7	2	3	2	1	612	68.4	5.2	9	2	transport	Golgi;membrane	protein binding	Pf04124	84342	ENSG00000272617.2	COG8	16			0	0.83	0.683	1.184	1.818	1.238	-0.27	-0.55	0.24	0.86	0.31	0.760287	0.826025	0.94153	0.0494724	0.884211	52.75	39.47	105.5	67.65	65.23	94.3
FALSE	High	Master Protein	Q96CX6	Leucine-rich repeat-containing protein 58 OS=Homo sapiens OX=9606 GN=LRRC58 PE=1 SV=2	0	FALSE	31.653	30	5	12	5	1	371	40.6	6.84	36.84	5			protein binding	Pf12799, Pf13855	116064	ENSG00000163428.3	LRRC58	3			0	1.449	1.269	1.018	1.818	1.882	0.54	0.34	0.03	0.86	0.91	0.0419589	0.841993	0.999922	0.0254691	0.102703	40.2	22.17	58.01	48.93	23.56	51.6
FALSE	Medium	None	O14967	Calmegin OS=Homo sapiens OX=9606 GN=CLGN PE=1 SV=1	0.041	FALSE	2.076	1	1	10	1	1	610	70	4.69	14.4	1	cell organization and biogenesis;metabolic process	endoplasmic reticulum;membrane	metal ion binding;protein binding	Pf00262	1047	ENSG00000153132.12	CLGN	4			0	0.985	0.569	0.956	1.815	0.942	-0.02	-0.81	-0.07	0.86	-0.09	0.979758	0.351232	0.977577	0.00785248	0.969017	44.14	21.42	126.51	146.53	130.12	116.1
FALSE	High	Master Protein	Q86U70	LIM domain-binding protein 1 OS=Homo sapiens OX=9606 GN=LDB1 PE=1 SV=2	0.001	FALSE	6.096	4	1	1	1	1	411	46.5	6.96	3.92	1	cell differentiation;cell organization and biogenesis;development;metabolic process;regulation of biological process;response to stimulus	nucleus	DNA binding;protein binding	Pf01803	8861	ENSG00000198728.10	LDB1	10	Transcriptional misregulation in cancer		0	0.385	0.335	1.175	1.805	0.548	-1.38	-1.58	0.23	0.85	-0.87	0.000346343	0.0973666	0.988797	0.692322	0.43276	1.46	7.29	33.64	69.09	16.11	191.5
FALSE	High	Master Protein	Q8IZ81	ELMO domain-containing protein 2 OS=Homo sapiens OX=9606 GN=ELMOD2 PE=1 SV=1	0	FALSE	24.222	24	7	13	7	1	293	34.9	8.05	28.6	7	defense response;regulation of biological process;response to stimulus	membrane	enzyme regulator activity	Pf04727	255520	ENSG00000179387.9	ELMOD2	4		Lung fibrosis	0	0.909	0.902	1.627	1.803	1.327	-0.14	-0.15	0.7	0.85	0.41	0.931016	0.999876	0.279179	0.0845772	0.810793	10.85	47.79	82.13	67.51	44.58	87.2
FALSE	High	Master Protein	P56282	DNA polymerase epsilon subunit 2 OS=Homo sapiens OX=9606 GN=POLE2 PE=1 SV=2	0	FALSE	13.559	12	3	7	3	1	527	59.5	6.35	14.99	3	cell organization and biogenesis;cellular homeostasis;metabolic process;response to stimulus	nucleus	catalytic activity;DNA binding;protein binding	Pf04042, Pf12213	5427	ENSG00000100479.12	POLE2	14	DNA replication; Purine metabolism; Base excision repair; HTLV-I infection; Nucleotide excision repair; Metabolic pathways; Pyrimidine metabolism	DNA Replication; Retinoblastoma (RB) in Cancer; G1 to S cell cycle control	0	0.6	0.554	1.341	1.802	0.645	-0.74	-0.85	0.42	0.85	-0.63	0.0109892	0.451692	0.908185	0.380865	0.420034	24.43	29.18	54.53	47.02	42.37	173.6
FALSE	High	Master Protein	Q3ZAQ7	Vacuolar ATPase assembly integral membrane protein VMA21 OS=Homo sapiens OX=9606 GN=VMA21 PE=1 SV=1	0.002	FALSE	4.962	12	1	9	1	1	101	11.3	7.24	23.02	1	cell organization and biogenesis;regulation of biological process	endoplasmic reticulum;membrane;vacuole		Pf09446	203547	ENSG00000160131.13	VMA21	X			0	0.882	0.697	1.134	1.8	1.068	-0.18	-0.52	0.18	0.85	0.09	0.922047	0.884284	0.99297	0.397718	0.995752	38.17	10.76	51.22	46.65	31.49	113.8
FALSE	High	None	B7ZAP0	Rab GTPase-activating protein 1-like, isoform 10 OS=Homo sapiens OX=9606 GN=RABGAP1L PE=1 SV=1	0	FALSE	12.117	10	2	8	2	1	253	29	5.33	26.41	2	regulation of biological process;transport	endosome;Golgi;nucleus	enzyme regulator activity;protein binding	Pf03148	9910	ENSG00000152061.23	RABGAP1L	1			0	0.956	0.632	0.872	1.8	0.966	-0.06	-0.66	-0.2	0.85	-0.05	0.981884	0.728455	0.935628	0.40192	0.975927	33.19	13.4	44.3	55.7	50.68	106
FALSE	High	None	P57723	Poly(rC)-binding protein 4 OS=Homo sapiens OX=9606 GN=PCBP4 PE=2 SV=1	0.002	FALSE	4.732	2	2	11	0	3	403	41.5	8.16	13.3	2	regulation of biological process;response to stimulus	cytoplasm;cytosol	DNA binding;RNA binding	Pf00013, Pf13014	57060	ENSG00000090097.21	PCBP4	3			0	0.927	0.65	1.007	1.797	0.885	-0.11	-0.62	0.01	0.85	-0.18	0.94523	0.744347	0.995124	0.0844131	0.932994	32.11	19.11	43.38	76.27	36.21	121.7
FALSE	High	Master Protein	Q96GQ7	Probable ATP-dependent RNA helicase DDX27 OS=Homo sapiens OX=9606 GN=DDX27 PE=1 SV=2	0.001	FALSE	5.524	2	1	2	1	1	796	89.8	9.28	5.94	1	metabolic process	chromosome;cytoplasm;nucleus	catalytic activity;nucleotide binding;protein binding;RNA binding	Pf00270, Pf00271, Pf06862	55661	ENSG00000124228.14	DDX27	20			0	2.078	1.042	1.061	1.793	2.205	1.05	0.06	0.09	0.84	1.14	0.0281398	0.98299	0.999922	0.465831	0.376522	31.68	68.56	0	13.33	31.68	61.4
FALSE	High	Master Protein	Q6NXT1	Ankyrin repeat domain-containing protein 54 OS=Homo sapiens OX=9606 GN=ANKRD54 PE=1 SV=2	0	FALSE	13.588	14	2	5	2	1	300	32.5	6.28	19.54	2	regulation of biological process;transport	cytoplasm;nucleus	enzyme regulator activity;protein binding	Pf00023, Pf12796, Pf13606, Pf13637, Pf13857	129138	ENSG00000100124.14	ANKRD54	22			0	0.821	0.6	0.88	1.793	0.722	-0.29	-0.74	-0.18	0.84	-0.47	0.830973	0.659109	0.966793	0.415914	0.825109	63.12	22.96	46.39	58.85	17.6	140.9
FALSE	High	Master Protein	O95294	RasGAP-activating-like protein 1 OS=Homo sapiens OX=9606 GN=RASAL1 PE=1 SV=3	0.002	FALSE	4.652	3	1	2	1	1	804	90	6.51	0	1	cell differentiation;metabolic process;regulation of biological process;response to stimulus	cytosol;membrane	enzyme regulator activity;metal ion binding;protein binding	Pf00168, Pf00169, Pf00616, Pf00779	8437	ENSG00000111344.11	RASAL1	12	Ras signaling pathway		0	1.346	0.783	0.838	1.793	1.129	0.43	-0.35	-0.25	0.84	0.17	0.7986	0.999876	0.948387	0.801188	0.972559	42.58	68.24	85.3	143.95	129.2	98
FALSE	High	Master Protein	Q13889	General transcription factor IIH subunit 3 OS=Homo sapiens OX=9606 GN=GTF2H3 PE=1 SV=2	0	FALSE	9.576	8	2	3	2	1	308	34.4	7.02	7.34	2	cell organization and biogenesis;metabolic process;regulation of biological process;response to stimulus	nucleus	catalytic activity;DNA binding;metal ion binding;protein binding;RNA binding	Pf03850	2967	ENSG00000111358.13	GTF2H3	12	Viral carcinogenesis; Basal transcription factors; Nucleotide excision repair	Eukaryotic Transcription Initiation	0	1.072	0.953	1.624	1.791	1.634	0.1	-0.07	0.7	0.84	0.71	0.966235	0.999876	0.745701	0.776682	0.768553	26.54	51.07	13.01	82.98	37.75	89.9
FALSE	High	None	A6NHQ2	rRNA/tRNA 2'-O-methyltransferase fibrillarin-like protein 1 OS=Homo sapiens OX=9606 GN=FBLL1 PE=3 SV=2	0.001	FALSE	5.214	3	1	4	1	1	334	34.8	10.35	14.76	1	cell organization and biogenesis;metabolic process	nucleus	catalytic activity;RNA binding	Pf01269, Pf13847	345630	ENSG00000188573.7	FBLL1	5			0	0.991	0.516	0.842	1.789	0.834	-0.01	-0.96	-0.25	0.84	-0.26	0.999944	0.642976	0.938487	0.566679	0.921137	29.95	17.93	10.89	67.86	20.93	121.5
FALSE	High	Master Protein	Q9NVH2	Integrator complex subunit 7 OS=Homo sapiens OX=9606 GN=INTS7 PE=1 SV=1	0	FALSE	27.098	9	5	12	5	1	962	106.8	8.02	26.24	5	metabolic process;response to stimulus;transport	chromosome;cytoplasm;cytosol;nucleus	protein binding;transporter activity		25896	ENSG00000143493.12	INTS7	1			0	1.217	0.798	0.814	1.788	0.795	0.28	-0.33	-0.3	0.84	-0.33	0.627501	0.964268	0.770735	0.295314	0.827646	55.51	27.19	62.28	90.44	62.49	87
FALSE	High	Master Protein	Q8N357	Solute carrier family 35 member F6 OS=Homo sapiens OX=9606 GN=SLC35F6 PE=1 SV=1	0.001	FALSE	5.927	4	1	4	1	1	371	40.2	6.93	10.07	1	regulation of biological process;transport	cytosol;membrane;mitochondrion;vacuole	protein binding;transporter activity	Pf00892, Pf04142	54978	ENSG00000213699.8	C2orf18; SLC35F6	2			0	0.892	0.763	1.682	1.785	1.479	-0.16	-0.39	0.75	0.84	0.56	0.947283	0.961568	0.69624	0.55916	0.879694	47.5	17.24	44.36	49.63	44.17	102.4
FALSE	High	Master Protein	A0AV96	RNA-binding protein 47 OS=Homo sapiens OX=9606 GN=RBM47 PE=1 SV=2	0.001	FALSE	5.667	2	1	2	1	1	593	64.1	7.68	4.12	1	cell differentiation;metabolic process	nucleus	RNA binding	Pf00076, Pf13893, Pf14259	54502	ENSG00000163694.14	RBM47	4		TYROBP Causal Network	0	1.257	1.281	1.623	1.785	2.287	0.33	0.36	0.7	0.84	1.19	0.847938	0.856474	0.741042	0.745599	0.308469	39.87	13.42	50.27	55.53	48.79	68.7
FALSE	High	Master Protein	Q92854	Semaphorin-4D OS=Homo sapiens OX=9606 GN=SEMA4D PE=1 SV=1	0.005	FALSE	3.708	2	1	1	1	1	862	96.1	7.96	1.86	1	cell differentiation;development;regulation of biological process;response to stimulus	membrane	protein binding;receptor activity;signal transducer activity	Pf01403, Pf01437	10507	ENSG00000187764.11	SEMA4D	9	Axon guidance		0	1.361	1.147	1.503	1.783	2.045	0.44	0.2	0.59	0.83	1.03	0.688668	0.955761	0.783417	0.427669	0.436219	74.44	26.01	50.15	69.71	78.16	72
FALSE	High	Master Protein	Q92747	Actin-related protein 2/3 complex subunit 1A OS=Homo sapiens OX=9606 GN=ARPC1A PE=2 SV=2	0	FALSE	20.989	17	4	14	3	1	370	41.5	8.18	51.49	4	cell organization and biogenesis;regulation of biological process;response to stimulus	cytoplasm;cytoskeleton;cytosol	protein binding	Pf00400	10552	ENSG00000241685.9	ARPC1A	7	Endocytosis; Pathogenic Escherichia coli infection; Salmonella infection; Regulation of actin cytoskeleton; Bacterial invasion of epithelial cells; Fc gamma R-mediated phagocytosis; Shigellosis	Pathogenic Escherichia coli infection	0	0.882	0.752	1.239	1.783	1.218	-0.18	-0.41	0.31	0.83	0.28	0.894836	0.941119	0.914622	0.38003	0.923376	33.09	32.67	60.87	39.23	67.14	134.9
FALSE	High	Master Protein	O14745	Na(+)/H(+) exchange regulatory cofactor NHE-RF1 OS=Homo sapiens OX=9606 GN=SLC9A3R1 PE=1 SV=4	0	FALSE	78.975	46	11	77	11	1	358	38.8	5.77	193.11	11	cell differentiation;cell organization and biogenesis;cellular homeostasis;regulation of biological process;response to stimulus;transport	cytoplasm;cytoskeleton;membrane;nucleus	protein binding;structural molecule activity	Pf00595, Pf09007, Pf13180	9368	ENSG00000109062.11	SLC9A3R1	17			0	0.792	0.582	1.171	1.782	0.903	-0.34	-0.78	0.23	0.83	-0.15	0.149974	0.168187	0.914622	0.00237407	0.936222	41.22	32.39	59.73	85.75	52.73	157.7
FALSE	High	Master Protein	P17152	Transmembrane protein 11, mitochondrial OS=Homo sapiens OX=9606 GN=TMEM11 PE=1 SV=1	0	FALSE	11.945	18	3	11	3	1	192	21.5	7.36	26.37	3	cell organization and biogenesis	membrane;mitochondrion	protein binding	Pf14972	8834	ENSG00000178307.9	TMEM11	17			0	0.931	0.807	1.525	1.781	1.217	-0.1	-0.31	0.61	0.83	0.28	0.97396	0.982246	0.789549	0.680542	0.969017	32.51	21.2	48.59	59.31	31.02	60.2
FALSE	High	Master Protein	P30989	Neurotensin receptor type 1 OS=Homo sapiens OX=9606 GN=NTSR1 PE=1 SV=2	0	FALSE	19.09	14	4	13	4	1	418	46.2	9.35	27.94	4	cell communication;metabolic process;regulation of biological process;response to stimulus;transport	cell surface;cytoplasm;endoplasmic reticulum;Golgi;membrane;mitochondrion	protein binding;receptor activity;signal transducer activity	Pf00001	4923	ENSG00000101188.4	NTSR1	20	Neuroactive ligand-receptor interaction; Calcium signaling pathway	GPCRs, Other; GPCRs, Class A Rhodopsin-like; Peptide GPCRs	0	1.103	0.452	0.567	1.78	0.714	0.14	-1.14	-0.82	0.83	-0.49	0.902551	0.16181	0.324453	0.766642	0.801542	43.64	11.84	23.24	46.82	34.14	177.2
FALSE	High	Master Protein	P03897	NADH-ubiquinone oxidoreductase chain 3 OS=Homo sapiens OX=9606 GN=MT-ND3 PE=1 SV=1	0.001	FALSE	5.403	13	1	4	1	1	115	13.2	4.44	8.97	1	cell organization and biogenesis;metabolic process;response to stimulus;transport	membrane;mitochondrion	catalytic activity;protein binding	Pf00507	4537	ENSG00000198840.2	ND3	MT	Parkinson's disease; Oxidative phosphorylation; Metabolic pathways	Electron Transport Chain; Oxidative phosphorylation	0	1.183	0.724	1.129	1.779	1.335	0.24	-0.47	0.17	0.83	0.42	0.905243	0.947488	0.990597	0.611243	0.934089	29.19	24.85	83.23	77.97	84.92	108.7
FALSE	High	Master Protein	O43674	NADH dehydrogenase [ubiquinone] 1 beta subcomplex subunit 5, mitochondrial OS=Homo sapiens OX=9606 GN=NDUFB5 PE=1 SV=1	0	FALSE	28.292	23	4	20	4	1	189	21.7	9.63	67.7	4	cell organization and biogenesis;metabolic process;transport	membrane;mitochondrion	catalytic activity	Pf09781	4711	ENSG00000136521.12	NDUFB5	3	Huntington's disease; Parkinson's disease; Alzheimer's disease; Oxidative phosphorylation; Non-alcoholic fatty liver disease (NAFLD); Metabolic pathways	Electron Transport Chain; Oxidative phosphorylation	0	0.784	0.674	1.152	1.779	1.147	-0.35	-0.57	0.2	0.83	0.2	0.386447	0.726673	0.966571	0.065659	0.929578	39.42	38.49	94.5	80.33	86.91	124.6
FALSE	High	Master Protein	P61956	Small ubiquitin-related modifier 2 OS=Homo sapiens OX=9606 GN=SUMO2 PE=1 SV=3	0	FALSE	12.723	23	2	19	2	1	95	10.9	5.5	48.91	2	metabolic process;regulation of biological process;response to stimulus	nucleus	catalytic activity;protein binding;RNA binding	Pf00240, Pf11976	6613	ENSG00000188612.11	SUMO2	17	RNA transport		0	0.921	0.665	1.264	1.777	1.192	-0.12	-0.59	0.34	0.83	0.25	0.934025	0.642046	0.755417	0.0040871	0.839335	45.24	22.65	45.65	66.38	73.72	126.3
FALSE	High	Master Protein	Q9HC07	Transmembrane protein 165 OS=Homo sapiens OX=9606 GN=TMEM165 PE=1 SV=1	0	FALSE	16.012	19	3	14	3	1	324	34.9	7.02	42.01	3	cellular homeostasis;metabolic process;transport	endosome;Golgi;membrane;vacuole		Pf01169	55858	ENSG00000134851.12	TMEM165	4			0	0.897	0.82	1.353	1.777	1.401	-0.16	-0.29	0.44	0.83	0.49	0.86515	0.96432	0.599827	0.0173635	0.514173	41.99	37.5	75.75	60.51	41.72	102.8
FALSE	High	Master Protein	Q96B23	Uncharacterized protein C18orf25 OS=Homo sapiens OX=9606 GN=C18orf25 PE=1 SV=3	0	FALSE	29.638	16	4	21	4	1	404	43.4	4.88	59.64	4	metabolic process		catalytic activity;protein binding	Pf15303	147339	ENSG00000152242.10	C18orf25	18			0	0.873	0.63	1.166	1.774	1.072	-0.2	-0.67	0.22	0.83	0.1	0.904857	0.770684	0.984781	0.263013	0.990159	43.93	20.34	56.71	51.66	62.9	104.3
FALSE	High	Master Protein	Q53RY4	Keratinocyte-associated protein 3 OS=Homo sapiens OX=9606 GN=KRTCAP3 PE=2 SV=1	0	FALSE	6.699	6	1	1	1	1	240	25.6	7.88	3.76	1		membrane		Pf12304	200634	ENSG00000157992.12	KRTCAP3	2			0	0.425	0.281	1.168	1.767	0.497	-1.23	-1.83	0.22	0.82	-1.01	0.0562294	0.0580274	0.988797	0.792933	0.423598	7.44	3.72	41.12	47.02	0	181.5
FALSE	High	None	Q9Y2X8	Ubiquitin-conjugating enzyme E2 D4 OS=Homo sapiens OX=9606 GN=UBE2D4 PE=1 SV=1	0	FALSE	7.914	12	1	9	0	2	147	16.6	7.37	40.67	1	metabolic process		catalytic activity;nucleotide binding;protein binding	Pf00179, Pf05773, Pf14461	51619	ENSG00000078967.12	UBE2D4	7	Ubiquitin mediated proteolysis; Protein processing in endoplasmic reticulum		0	1.015	0.732	1.271	1.764	1.291	0.02	-0.45	0.35	0.82	0.37	0.978793	0.841993	0.766401	0.0243111	0.741902	79.05	32.91	31.96	39.73	80.6	99.1
FALSE	High	Master Protein	Q96KC8	DnaJ homolog subfamily C member 1 OS=Homo sapiens OX=9606 GN=DNAJC1 PE=1 SV=1	0	FALSE	13.215	6	3	14	3	1	554	63.8	8.63	27.38	3	metabolic process;regulation of biological process	endoplasmic reticulum;membrane;nucleus	DNA binding;enzyme regulator activity;protein binding	Pf00226, Pf00249	64215	ENSG00000136770.10	DNAJC1	10	Protein processing in endoplasmic reticulum		0	0.857	0.487	1.067	1.756	0.849	-0.22	-1.04	0.09	0.81	-0.24	0.88967	0.258081	0.999922	0.464413	0.909496	59.94	20.4	85.69	80.17	40.33	179.6
FALSE	High	Master Protein	P06454	Prothymosin alpha OS=Homo sapiens OX=9606 GN=PTMA PE=1 SV=2	0	FALSE	22.574	14	4	7	4	1	111	12.2	3.78	14.61	4	cell organization and biogenesis;metabolic process	cytosol;nucleus	protein binding		5757	ENSG00000187514.16	PTMA	2	Epstein-Barr virus infection		0	0.462	0.319	0.724	1.755	0.501	-1.11	-1.65	-0.47	0.81	-1	0.0808016	0.130951	0.8037	0.844933	0.431732	28.18	9	61.92	80.72	32.22	120.1
FALSE	High	None	Q86TC9	Myopalladin OS=Homo sapiens OX=9606 GN=MYPN PE=1 SV=2	0.001	FALSE	5.223	1	1	9	1	1	1320	145.2	6.77	20.32	1	cell organization and biogenesis;regulation of biological process	cytoplasm;nucleus	protein binding	Pf00047, Pf07679, Pf13895, Pf13927	84665	ENSG00000138347.15	MYPN	10		Integrin-mediated Cell Adhesion	0	0.872	1.188	1.538	1.755	1.342	-0.2	0.25	0.62	0.81	0.42	0.940867	0.941119	0.825618	0.671046	0.923068	15.29	35.22	28.34	71.06	28.34	90.9
FALSE	Medium	None	P30711	Glutathione S-transferase theta-1 OS=Homo sapiens OX=9606 GN=GSTT1 PE=1 SV=4	0.032	FALSE	2.207	3	1	8	1	1	240	27.3	7.49	14.56	1	metabolic process	cytoplasm;cytosol	antioxidant activity;catalytic activity;protein binding	Pf00043, Pf02798, Pf13409, Pf13417	2952	ENSG00000277656.3	GSTT1	22; CHR_HSCHR22_1_CTG7	Glutathione metabolism; Metabolism of xenobiotics by cytochrome P450; Drug metabolism - cytochrome P450; Chemical carcinogenesis; Platinum drug resistance	NRF2 pathway; Aflatoxin B1 metabolism; Metapathway biotransformation; Glutathione metabolism	0	0.952	0.743	1.368	1.755	1.303	-0.07	-0.43	0.45	0.81	0.38	0.981907	0.891874	0.875111	0.478014	0.895926	7.7	7.74	9.48	13.47	9.8	100.1
FALSE	High	Master Protein	P19474	E3 ubiquitin-protein ligase TRIM21 OS=Homo sapiens OX=9606 GN=TRIM21 PE=1 SV=1	0	FALSE	8.016	6	2	3	2	1	475	54.1	6.38	6.61	2	cell organization and biogenesis;defense response;metabolic process;regulation of biological process;response to stimulus	cytoplasm;cytosol;nucleus;vacuole	catalytic activity;DNA binding;metal ion binding;protein binding;RNA binding	Pf00097, Pf00622, Pf00643, Pf11789, Pf12128, Pf12678, Pf13445, Pf13639, Pf13765, Pf13920, Pf13923, Pf14570, Pf14634, Pf14835, Pf15227	6737	ENSG00000132109.9	TRIM21	11	Systemic lupus erythematosus		0	1.073	0.746	1.101	1.754	1.221	0.1	-0.42	0.14	0.81	0.29	0.97573	0.96071	0.995258	0.720065	0.965371	23.71	21.64	34.04	26	45.92	99.1
FALSE	High	Master Protein	Q8WW22	DnaJ homolog subfamily A member 4 OS=Homo sapiens OX=9606 GN=DNAJA4 PE=1 SV=1	0	FALSE	17.472	12	3	18	3	1	397	44.8	7.59	17.9	3	metabolic process;regulation of biological process;response to stimulus	cytosol;membrane	metal ion binding;nucleotide binding;protein binding	Pf00226, Pf00684, Pf01556	55466	ENSG00000140403.12	DNAJA4	15			0	1.004	0.757	1.107	1.753	1.172	0.01	-0.4	0.15	0.81	0.23	0.988405	0.91531	0.988797	0.256675	0.932994	74.3	39.27	80.24	71.51	70.98	115.7
FALSE	High	Master Protein	Q9NPA0	ER membrane protein complex subunit 7 OS=Homo sapiens OX=9606 GN=EMC7 PE=1 SV=1	0	FALSE	22.676	32	4	19	4	1	242	26.5	9.25	50.08	4		membrane		Pf09430	56851	ENSG00000134153.9	EMC7	15			0	0.872	0.823	1.522	1.753	1.437	-0.2	-0.28	0.61	0.81	0.52	0.758034	0.963987	0.229993	0.0207689	0.470037	38.54	41.39	32.83	48.2	46.57	97.4
FALSE	High	Master Protein	P56385	ATP synthase subunit e, mitochondrial OS=Homo sapiens OX=9606 GN=ATP5ME PE=1 SV=2	0	FALSE	24.198	62	4	34	4	1	69	7.9	9.35	88.82	4	cell organization and biogenesis;metabolic process;transport	membrane;mitochondrion	catalytic activity;transporter activity	Pf05680	521	ENSG00000169020.9	ATP5I	4	Oxidative phosphorylation; Metabolic pathways	Oxidative phosphorylation; Electron Transport Chain	0	0.742	0.961	1.823	1.749	1.421	-0.43	-0.06	0.87	0.81	0.51	0.0824297	0.980861	0.0195206	0.025747	0.444739	48.1	58.87	33.87	35.05	63.27	132.3
FALSE	High	Master Protein	P52292	Importin subunit alpha-1 OS=Homo sapiens OX=9606 GN=KPNA2 PE=1 SV=1	0	FALSE	185.164	74	23	229	23	1	529	57.8	5.4	747.27	23	metabolic process;regulation of biological process;transport	cytoplasm;cytosol;membrane;nucleus	protein binding;RNA binding;transporter activity	Pf00514, Pf01749, Pf13513, Pf13646	3838	ENSG00000182481.8	KPNA2	17	Influenza A		0	1.04	0.427	0.776	1.749	0.803	0.06	-1.23	-0.37	0.81	-0.32	0.549026	0.000108226	0.169182	4.33229e-05	0.611121	40.16	8.4	33.35	66.43	37.34	121.7
FALSE	High	Master Protein	Q14978	Nucleolar and coiled-body phosphoprotein 1 OS=Homo sapiens OX=9606 GN=NOLC1 PE=1 SV=2	0	FALSE	33.899	10	5	39	5	1	699	73.6	9.47	96.51	5	cell organization and biogenesis;metabolic process;regulation of biological process	cytoplasm;nucleus	nucleotide binding;protein binding;RNA binding	Pf05022	9221	ENSG00000166197.16	NOLC1	10			0	1.197	0.729	0.957	1.747	0.936	0.26	-0.46	-0.06	0.8	-0.09	0.594242	0.821377	0.985659	0.0282324	0.969017	56.8	33.16	45.15	60.28	69.32	114.7
FALSE	High	Master Protein	Q9Y4U1	Methylmalonic aciduria and homocystinuria type C protein OS=Homo sapiens OX=9606 GN=MMACHC PE=1 SV=3	0	FALSE	12.107	10	2	2	2	1	282	31.7	7.81	8.07	2	metabolic process	cytoplasm;cytosol;mitochondrion	catalytic activity;nucleotide binding;protein binding		25974	ENSG00000132763.14	MMACHC	1	Vitamin digestion and absorption		0	0.809	0.598	1.471	1.746	1.065	-0.3	-0.74	0.56	0.8	0.09	0.863173	0.82545	0.775925	0.525933	0.995752	23.43	1.44	17.56	3.96	5.97	101.3
FALSE	High	Master Protein	Q96KB5	Lymphokine-activated killer T-cell-originated protein kinase OS=Homo sapiens OX=9606 GN=PBK PE=1 SV=3	0	FALSE	56.094	44	9	45	9	1	322	36.1	5.12	129.9	9	metabolic process;regulation of biological process;response to stimulus	nucleus	catalytic activity;nucleotide binding;protein binding	Pf00069, Pf07714	55872	ENSG00000168078.9	PBK	8		4-hydroxytamoxifen, Dexamethasone, and Retinoic Acids Regulation of p27 Expression; VEGFA-VEGFR2 Signaling Pathway	0	0.904	0.535	0.877	1.742	0.861	-0.15	-0.9	-0.19	0.8	-0.22	0.876913	0.112945	0.799757	0.00676248	0.85124	34.82	14.96	36.73	59.56	34.22	130
FALSE	High	Master Protein	O43395	U4/U6 small nuclear ribonucleoprotein Prp3 OS=Homo sapiens OX=9606 GN=PRPF3 PE=1 SV=2	0	FALSE	31.776	15	7	19	7	1	683	77.5	9.5	40.65	7	cell organization and biogenesis;metabolic process	cytosol;nucleus;spliceosomal complex	protein binding;RNA binding	Pf01480, Pf06544, Pf08572	9129	ENSG00000117360.12	PRPF3	1	Spliceosome	mRNA Processing	0	1.029	0.582	0.836	1.74	0.848	0.04	-0.78	-0.26	0.8	-0.24	0.934025	0.338855	0.829104	0.0265275	0.895891	30.88	35.53	29.96	130.68	44.13	161.3
FALSE	High	Master Protein	Q969H6	Ribonuclease P/MRP protein subunit POP5 OS=Homo sapiens OX=9606 GN=POP5 PE=1 SV=1	0.001	FALSE	5.517	7	1	6	1	1	163	18.8	7.27	14.75	1	metabolic process;transport	nucleus	catalytic activity;protein binding;transporter activity	Pf00999	51367	ENSG00000167272.10	POP5	12	Ribosome biogenesis in eukaryotes; RNA transport		0	3.701	2.211	1.036	1.735	3.835	1.89	1.14	0.05	0.79	1.94	1.67464e-13	0.0838075	0.999922	0.343586	0.000219128	1.78	73.76	19.74	64.49	19.97	37.2
FALSE	High	Master Protein	O94916	Nuclear factor of activated T-cells 5 OS=Homo sapiens OX=9606 GN=NFAT5 PE=1 SV=1	0	FALSE	8.081	2	2	3	2	1	1531	165.7	5.24	4.4	2	metabolic process;regulation of biological process;response to stimulus	cytoplasm;cytosol;nucleus	DNA binding;protein binding	Pf00554, Pf09770	10725	ENSG00000102908.20	NFAT5	16			0	1.12	0.473	0.757	1.734	0.784	0.16	-1.08	-0.4	0.79	-0.35	0.934189	0.653024	0.865251	0.814477	0.91238	59.42	11.49	32.19	59.65	15.42	61.5
FALSE	High	Master Protein	Q7Z7F0	KH homology domain-containing protein 4 OS=Homo sapiens OX=9606 GN=KHDC4 PE=1 SV=1	0	FALSE	15.484	9	3	3	3	1	614	64.8	8.73	9.4	3	cell organization and biogenesis;metabolic process	cytoplasm;nucleus;spliceosomal complex	protein binding;RNA binding		22889	ENSG00000132680.10	KIAA0907; KHDC4	1			0	0.841	0.894	0.725	1.734	1.394	-0.25	-0.16	-0.46	0.79	0.48	0.844125	0.999876	0.686801	0.471236	0.821132	27.87	69.82	43.13	93.06	88.41	138
FALSE	High	Master Protein	Q9NZD8	Maspardin OS=Homo sapiens OX=9606 GN=SPG21 PE=1 SV=1	0	FALSE	20.402	16	3	6	3	1	308	34.9	6.28	15.94	3	metabolic process;regulation of biological process;response to stimulus	cytoplasm;cytosol;endosome;Golgi;membrane	catalytic activity;protein binding	Pf00561, Pf00975, Pf12695, Pf12697	51324	ENSG00000090487.10	SPG21	15	Endocytosis		0	0.871	0.823	1.645	1.734	1.522	-0.2	-0.28	0.72	0.79	0.61	0.876913	0.980861	0.583168	0.468814	0.708427	33.69	13.36	72.48	30.16	46.23	119.6
FALSE	High	Master Protein	O14944	Proepiregulin OS=Homo sapiens OX=9606 GN=EREG PE=1 SV=1	0	FALSE	6.606	13	2	4	2	1	169	19	7.53	9.47	2	cell communication;cell differentiation;cell organization and biogenesis;cell proliferation;development;metabolic process;regulation of biological process;response to stimulus	extracellular;membrane	catalytic activity;protein binding		2069	ENSG00000124882.3	EREG	4	ErbB signaling pathway	ErbB Signaling Pathway	0	1.071	0.338	0.715	1.734	0.448	0.1	-1.56	-0.48	0.79	-1.16	0.956724	0.174226	0.808339	0.855991	0.300467	46.42	2.52	44.58	57.06	10.23	145.5
FALSE	High	None	Q96DU9	Polyadenylate-binding protein 5 OS=Homo sapiens OX=9606 GN=PABPC5 PE=2 SV=1	0.002	FALSE	4.546	2	1	13	1	1	382	43.3	9.51	40.12	1		cytoplasm;mitochondrion;organelle lumen	RNA binding	Pf00076, Pf13893, Pf14259	140886	ENSG00000174740.7	PABPC5	X	RNA degradation; mRNA surveillance pathway; RNA transport		0	0.861	0.619	1.188	1.729	1.085	-0.22	-0.69	0.25	0.79	0.12	0.714522	0.477696	0.911133	0.00977483	0.956825	15.35	7.04	41.16	39.78	53.35	112
FALSE	High	Master Protein	Q96FZ7	Charged multivesicular body protein 6 OS=Homo sapiens OX=9606 GN=CHMP6 PE=1 SV=3	0	FALSE	13.243	13	2	11	2	1	201	23.5	5.31	28.09	2	cell communication;cell organization and biogenesis;metabolic process;regulation of biological process;response to stimulus;transport	cytosol;endosome;membrane	protein binding	Pf03357	79643	ENSG00000176108.9	CHMP6	17	Endocytosis		0	0.631	0.685	1.776	1.724	1.183	-0.66	-0.55	0.83	0.79	0.24	0.163144	0.848766	0.436711	0.395573	0.954564	25.01	31.17	47.48	30.39	34.48	75.5
FALSE	High	Master Protein	Q15819	Ubiquitin-conjugating enzyme E2 variant 2 OS=Homo sapiens OX=9606 GN=UBE2V2 PE=1 SV=4	0	FALSE	47.712	45	7	104	1	1	145	16.4	8.09	284.86	7	cell proliferation;metabolic process;regulation of biological process;response to stimulus	cytoplasm;nucleus	catalytic activity;protein binding	Pf00179	7336	ENSG00000169139.11	UBE2V2	8			0	0.784	0.557	1.242	1.723	0.974	-0.35	-0.84	0.31	0.79	-0.04	0.81184	0.710684	0.980485	0.717703	0.979113	34.02	28.66	70	94.42	69.91	123.9
FALSE	High	Master Protein	O95817	BAG family molecular chaperone regulator 3 OS=Homo sapiens OX=9606 GN=BAG3 PE=1 SV=3	0	FALSE	81.949	41	12	52	12	1	575	61.6	6.95	162.99	12	cell death;metabolic process;regulation of biological process;response to stimulus	cytoplasm;cytosol;membrane;nucleus	enzyme regulator activity;nucleotide binding;protein binding	Pf00397, Pf02179	9531	ENSG00000151929.9	BAG3	10			0	0.7	0.467	0.951	1.722	0.639	-0.51	-1.1	-0.07	0.78	-0.65	0.00139281	0.0101001	0.970956	0.0352848	0.0849916	45.05	23.89	66.47	98.69	36.5	198.7
FALSE	High	Master Protein	Q9NZ52	ADP-ribosylation factor-binding protein GGA3 OS=Homo sapiens OX=9606 GN=GGA3 PE=1 SV=1	0	FALSE	17.922	6	3	8	2	1	723	78.3	5.58	14.5	3	metabolic process;regulation of biological process;transport	endosome;Golgi;membrane	protein binding	Pf00790, Pf02883, Pf03127	23163	ENSG00000125447.16	GGA3	17	Lysosome		0	2.557	2.902	1.729	1.721	4.994	1.35	1.54	0.79	0.78	2.32	0.000406733	0.00789278	0.456728	0.443187	2.49267e-06	108.91	73.42	78.09	53.28	95.07	52
FALSE	Low	Master Protein	Q9H7X7	Intraflagellar transport protein 22 homolog OS=Homo sapiens OX=9606 GN=IFT22 PE=1 SV=1	0.156	FALSE	1.07	12	1	6	1	1	185	20.8	5.15	0	1	cellular component movement;regulation of biological process;response to stimulus;transport		nucleotide binding	Pf00071, Pf08477, Pf09439	64792	ENSG00000128581.15	RABL5; IFT22	7			0	0.431	1.728	6.907	1.721	2.974	-1.22	0.79	2.79	0.78	1.57	0.128745	0.498691	3.41807e-06	0.760484	0.0736834	8.85	20.04	21.05	0	20.04	65.2
FALSE	High	Master Protein	Q15027	Arf-GAP with coiled-coil, ANK repeat and PH domain-containing protein 1 OS=Homo sapiens OX=9606 GN=ACAP1 PE=1 SV=1	0.001	FALSE	5.438	2	1	7	1	1	740	81.5	7.66	21.36	1	regulation of biological process;transport	endosome;membrane	enzyme regulator activity;metal ion binding;protein binding	Pf00023, Pf00169, Pf01412, Pf12796, Pf13637, Pf13857	9744	ENSG00000072818.11	ACAP1	17	Endocytosis	Nucleotide-binding Oligomerization Domain (NOD) pathway	0	0.138	1.11	10.201	1.72	1.262	-2.86	0.15	3.35	0.78	0.34	1.01704e-11	0.962137	2.88847e-08	0.5648	0.953713	1.86	59.75	134.61	96.6	103.06	90.2
FALSE	Low	Master Protein	Q9UFG5	UPF0449 protein C19orf25 OS=Homo sapiens OX=9606 GN=C19orf25 PE=1 SV=2	0.14	FALSE	1.123	17	1	1	1	1	118	12.9	5.07	0	1			protein binding	Pf15136	148223	ENSG00000119559.15	C19orf25	19			0	0.773	0.483	1.074	1.72	0.83	-0.37	-1.05	0.1	0.78	-0.27	0.806719	0.573761	0.999922	0.682979	0.927547	35.95	14.01	0	0	41.44	129.6
FALSE	High	Master Protein	O60427	Acyl-CoA (8-3)-desaturase OS=Homo sapiens OX=9606 GN=FADS1 PE=1 SV=3	0	FALSE	11.907	10	3	4	3	1	444	51.9	8.87	8.07	3	cell communication;metabolic process;regulation of biological process;response to stimulus;transport	endoplasmic reticulum;membrane;mitochondrion	catalytic activity	Pf00173, Pf00487	3992		FADS1	11	Biosynthesis of unsaturated fatty acids; Fatty acid metabolism		0	0.721	0.579	1.129	1.72	0.931	-0.47	-0.79	0.18	0.78	-0.1	0.475953	0.611488	0.988797	0.508675	0.969017	30.01	9.98	48.87	43.24	20	105.2
FALSE	Medium	Master Protein	Q6NUP7	Serine/threonine-protein phosphatase 4 regulatory subunit 4 OS=Homo sapiens OX=9606 GN=PPP4R4 PE=1 SV=1	0.024	FALSE	2.446	1	1	5	1	1	873	99.4	7.8	5.34	1	regulation of biological process	cytoplasm;cytosol	enzyme regulator activity;protein binding		57718	ENSG00000278326.4; ENSG00000119698.11	PPP4R4	14; CHR_HSCHR14_7_CTG1			0	0.611	3.846	10.808	1.718	6.608	-0.71	1.94	3.43	0.78	2.72	0.174935	3.93977e-05	3.26911e-16	0.0411255	2.5271e-12	0	0	0	0	0	33.2
FALSE	High	Master Protein	Q49B96	Cytochrome c oxidase assembly protein COX19 OS=Homo sapiens OX=9606 GN=COX19 PE=1 SV=1	0.002	FALSE	4.604	11	1	2	1	1	90	10.4	8.72	4.07	1	cell organization and biogenesis;metabolic process	cytoplasm;cytosol		Pf06747	90639	ENSG00000240230.5	COX19	7			0	1.932	1.158	1.03	1.718	1.99	0.95	0.21	0.04	0.78	0.99	0.107328	0.949619	0.999922	0.567126	0.474973	0	76.94	22.91	65.97	22.91	65.8
FALSE	High	Master Protein	Q96HR8	H/ACA ribonucleoprotein complex non-core subunit NAF1 OS=Homo sapiens OX=9606 GN=NAF1 PE=1 SV=2	0	FALSE	13.638	5	2	13	2	1	494	53.7	4.87	57.03	2	cell organization and biogenesis;metabolic process;regulation of biological process	cytoplasm;nucleus	protein binding;RNA binding	Pf04410	92345	ENSG00000145414.8	NAF1	4			0	1.18	0.565	0.866	1.715	1.015	0.24	-0.82	-0.21	0.78	0.02	0.548106	0.300306	0.832441	0.0352848	0.995752	52.99	20.4	35.98	46.95	42.55	113.6
FALSE	High	Master Protein	Q5M775	Cytospin-B OS=Homo sapiens OX=9606 GN=SPECC1 PE=1 SV=1	0	FALSE	7.212	2	2	4	2	1	1068	118.5	6.7	5.8	2	cell organization and biogenesis;metabolic process;transport	cytoskeleton;Golgi;membrane;nucleus	catalytic activity;motor activity;protein binding;transporter activity	Pf00307, Pf01496, Pf01576, Pf02463, Pf03962, Pf04111, Pf04156, Pf05478, Pf05667, Pf06160, Pf07888, Pf09730, Pf10174, Pf11971, Pf12128	92521	ENSG00000128487.16	SPECC1	17			0	0.519	0.798	1.256	1.714	1.112	-0.95	-0.33	0.33	0.78	0.15	0.10263	0.990434	0.95004	0.659833	0.993136	25.7	34.85	68.48	89.37	39.21	30.5
FALSE	Low	None	Q712K3	Ubiquitin-conjugating enzyme E2 R2 OS=Homo sapiens OX=9606 GN=UBE2R2 PE=1 SV=1	0.06	FALSE	1.765	3	1	1	1	1	238	27.1	4.42	0	1	metabolic process	cytoplasm;cytosol	catalytic activity;nucleotide binding;protein binding	Pf00179, Pf14461	54926	ENSG00000107341.4	UBE2R2	9	Ubiquitin mediated proteolysis; Herpes simplex infection		0	1.055	0.824	1.209	1.714	1.275	0.08	-0.28	0.27	0.78	0.35	0.979532	0.999876	0.98859	0.801811	0.929578	6.18	35.41	57.67	54.35	58.51	96.3
FALSE	High	Master Protein	Q96GA3	Protein LTV1 homolog OS=Homo sapiens OX=9606 GN=LTV1 PE=1 SV=1	0	FALSE	50.671	30	7	23	7	1	475	54.8	4.91	52.3	7	metabolic process;transport	cytosol;membrane;nucleus	protein binding	Pf04180	84946	ENSG00000135521.8	LTV1	6			0	1.174	0.482	0.83	1.713	0.818	0.23	-1.05	-0.27	0.78	-0.29	0.364557	0.0707534	0.71405	0.0402369	0.854247	56.92	13.21	42.64	55.25	39.43	126.6
FALSE	High	Master Protein	Q01167	Forkhead box protein K2 OS=Homo sapiens OX=9606 GN=FOXK2 PE=1 SV=3	0	FALSE	39.766	21	7	29	7	1	660	69	9.54	74.34	7	cell differentiation;metabolic process;regulation of biological process	nucleus	DNA binding;metal ion binding;protein binding	Pf00250, Pf00498	3607	ENSG00000141568.20	FOXK2	17			0	1.072	0.71	0.943	1.712	1.185	0.1	-0.49	-0.08	0.78	0.24	0.878868	0.794953	0.967432	0.0352848	0.88909	47.75	24.34	33.69	78.73	64.19	116.2
FALSE	High	Master Protein	Q13439	Golgin subfamily A member 4 OS=Homo sapiens OX=9606 GN=GOLGA4 PE=1 SV=1	0	FALSE	33.096	5	9	15	9	1	2230	261	5.39	21.97	9	cell organization and biogenesis;regulation of biological process;transport	cytoplasm;cytosol;Golgi;membrane	protein binding	Pf01465, Pf09731, Pf12128	2803	ENSG00000144674.16	GOLGA4	3			0	0.917	0.77	1.021	1.705	1.046	-0.13	-0.38	0.03	0.77	0.06	0.933752	0.938118	0.999922	0.206748	0.993894	33.88	26.08	41.8	60.66	52.02	117.1
FALSE	High	Master Protein	Q8N5N7	39S ribosomal protein L50, mitochondrial OS=Homo sapiens OX=9606 GN=MRPL50 PE=1 SV=2	0	FALSE	36.321	33	3	19	3	1	158	18.3	7.88	61.28	3	cell organization and biogenesis;metabolic process	membrane;mitochondrion;ribosome		Pf10501	54534	ENSG00000136897.7	MRPL50	9			0	0.668	0.484	0.785	1.698	0.805	-0.58	-1.05	-0.35	0.76	-0.31	0.0443595	0.134354	0.754832	0.344615	0.837705	32.27	13.13	47.68	38.56	23.07	170.7
FALSE	High	Master Protein	Q9UII2	ATPase inhibitor, mitochondrial OS=Homo sapiens OX=9606 GN=ATP5IF1 PE=1 SV=1	0.003	FALSE	4.122	8	2	10	2	1	106	12.2	9.35	5.1	2	cell differentiation;cell organization and biogenesis;metabolic process;regulation of biological process	cell surface;mitochondrion	catalytic activity;enzyme regulator activity;protein binding	Pf04568	93974	ENSG00000130770.17	ATPIF1	1		Electron Transport Chain	0	1.282	0.799	1.072	1.697	1.346	0.36	-0.32	0.1	0.76	0.43	0.841465	0.991421	0.999922	0.783667	0.921137	76.04	56.1	111.46	99.06	116.18	94.5
FALSE	High	Master Protein	P82914	28S ribosomal protein S15, mitochondrial OS=Homo sapiens OX=9606 GN=MRPS15 PE=1 SV=1	0	FALSE	17.804	12	5	10	5	1	257	29.8	10.48	22.91	5	cell organization and biogenesis;metabolic process	membrane;mitochondrion;nucleus;ribosome	RNA binding;structural molecule activity	Pf00312	64960	ENSG00000116898.11	MRPS15	1	Ribosome		0	1.067	0.911	0.956	1.696	1.386	0.09	-0.14	-0.07	0.76	0.47	0.931016	0.999876	0.984781	0.0514985	0.727429	46.04	49.03	89.73	102.44	68.98	62.5
FALSE	High	None	Q2TB90	Putative hexokinase HKDC1 OS=Homo sapiens OX=9606 GN=HKDC1 PE=1 SV=3	0.005	FALSE	3.774	2	2	12	1	1	917	102.5	7.12	11.01	2	cellular homeostasis;metabolic process	cytosol;mitochondrion	catalytic activity;nucleotide binding	Pf00349, Pf03727	80201	ENSG00000156510.12	HKDC1	10	Insulin signaling pathway; HIF-1 signaling pathway; Central carbon metabolism in cancer; Carbon metabolism; Galactose metabolism; Type II diabetes mellitus; Neomycin, kanamycin and gentamicin biosynthesis; Starch and sucrose metabolism; Fructose and mannose metabolism; Glycolysis / Gluconeogenesis; Carbohydrate digestion and absorption; Amino sugar and nucleotide sugar metabolism; Metabolic pathw…		0	1.099	0.302	0.277	1.696	0.325	0.14	-1.73	-1.85	0.76	-1.62	0.935314	0.0430779	0.000431035	0.678809	0.0170299	50.69	7.15	7.09	122.19	7.47	142.7
FALSE	High	Master Protein	Q7KZI7	Serine/threonine-protein kinase MARK2 OS=Homo sapiens OX=9606 GN=MARK2 PE=1 SV=2	0	FALSE	14.798	11	5	6	5	1	788	87.9	9.72	8.44	5	cell differentiation;cell organization and biogenesis;cellular component movement;development;metabolic process;regulation of biological process;response to stimulus	cytoplasm;cytoskeleton;membrane;mitochondrion	catalytic activity;enzyme regulator activity;metal ion binding;nucleotide binding;protein binding;RNA binding	Pf00069, Pf00627, Pf02149, Pf07714, Pf14531	2011	ENSG00000072518.20	MARK2	11		Regulation of Microtubule Cytoskeleton	0	0.81	0.516	0.968	1.696	0.851	-0.3	-0.95	-0.05	0.76	-0.23	0.853796	0.624684	0.990597	0.662328	0.947623	27.05	12.79	34.25	66.35	46.61	62.3
FALSE	High	Master Protein	Q9Y5J7	Mitochondrial import inner membrane translocase subunit Tim9 OS=Homo sapiens OX=9606 GN=TIMM9 PE=1 SV=1	0.002	FALSE	4.804	12	1	2	1	1	89	10.4	7.21	5.82	1	cell organization and biogenesis;transport	membrane;mitochondrion	metal ion binding;protein binding;transporter activity	Pf02953	26520	ENSG00000100575.13	TIMM9	14			0	0.609	0.553	1.748	1.695	0.793	-0.72	-0.85	0.81	0.76	-0.33	0.0947608	0.451692	0.474785	0.5272	0.85124	25.94	19.25	48.36	55.46	32.84	151.5
FALSE	High	Master Protein	Q03518	Antigen peptide transporter 1 OS=Homo sapiens OX=9606 GN=TAP1 PE=1 SV=2	0	FALSE	29.067	12	5	15	5	1	808	87.2	8.02	57.18	5	defense response;response to stimulus;transport	endoplasmic reticulum;membrane;mitochondrion	catalytic activity;nucleotide binding;protein binding;transporter activity	Pf00005, Pf00664, Pf13304, Pf13476	6890	ENSG00000232367.5; ENSG00000227816.4; ENSG00000226173.4; ENSG00000230705.4; ENSG00000168394.10; ENSG00000206297.7; ENSG00000224212.4	TAP1	6; CHR_HSCHR6_MHC_COX_CTG1; CHR_HSCHR6_MHC_APD_CTG1; CHR_HSCHR6_MHC_MANN_CTG1; CHR_HSCHR6_MHC_MCF_CTG1; CHR_HSCHR6_MHC_QBL_CTG1; CHR_HSCHR6_MHC_DBB_CTG1	Primary immunodeficiency; Phagosome; Herpes simplex infection; ABC transporters; Antigen processing and presentation	Type II interferon signaling (IFNG); Mecp2 and Associated Rett Syndrome	0	1.038	1.088	1.436	1.692	1.736	0.05	0.12	0.52	0.76	0.8	0.952508	0.941775	0.402119	0.051659	0.182464	48.39	67.48	31.62	51.87	58.32	80.7
FALSE	High	Master Protein	Q86SK9	Stearoyl-CoA desaturase 5 OS=Homo sapiens OX=9606 GN=SCD5 PE=1 SV=2	0	FALSE	10.453	9	2	8	2	1	330	37.6	9.61	9.01	2	metabolic process	endoplasmic reticulum;membrane	catalytic activity;metal ion binding	Pf00487	79966	ENSG00000145284.11	SCD5	4	PPAR signaling pathway; AMPK signaling pathway; Biosynthesis of unsaturated fatty acids; Fatty acid metabolism		0	0.966	1.073	1.997	1.692	1.854	-0.05	0.1	1	0.76	0.89	0.98899	0.972965	0.44647	0.640921	0.669384	79.07	83.05	68.86	76.88	76.88	86.3
FALSE	Medium	Master Protein	Q96RR4	Calcium/calmodulin-dependent protein kinase kinase 2 OS=Homo sapiens OX=9606 GN=CAMKK2 PE=1 SV=2	0.017	FALSE	2.753	1	1	2	1	1	588	64.7	6.68	1.69	1	metabolic process;regulation of biological process;response to stimulus	cytoplasm;cytosol;nucleus	catalytic activity;metal ion binding;nucleotide binding;protein binding	Pf00069, Pf07714, Pf14531	10645	ENSG00000110931.18	CAMKK2	12	Oxytocin signaling pathway; AMPK signaling pathway; Alcoholism; Adipocytokine signaling pathway; Longevity regulating pathway	AMP-activated Protein Kinase (AMPK) Signaling; VEGFA-VEGFR2 Signaling Pathway	0	0.91	0.904	2.109	1.691	1.627	-0.14	-0.15	1.08	0.76	0.7	0.954606	0.999876	0.173766	0.539622	0.645208	39.45	63.91	87.94	105.55	110.67	101
FALSE	High	Master Protein	Q9P2W1	Homologous-pairing protein 2 homolog OS=Homo sapiens OX=9606 GN=PSMC3IP PE=1 SV=1	0.007	FALSE	3.528	9	1	2	1	1	217	24.9	7.81	5.27	1	metabolic process;regulation of biological process	nucleus	DNA binding	Pf04111, Pf07106	29893	ENSG00000131470.14	PSMC3IP	17		Androgen receptor signaling pathway	0	100	100	0.724	1.691	100	6.64	6.64	-0.47	0.76	6.64	4.12715e-16	3.81902e-16	0.774399	0.598905	3.35161e-16			0	0
FALSE	High	Master Protein	Q969Y2	tRNA modification GTPase GTPBP3, mitochondrial OS=Homo sapiens OX=9606 GN=GTPBP3 PE=1 SV=2	0	FALSE	22.58	8	2	23	2	1	492	52	6.48	78.83	2	metabolic process;regulation of biological process;response to stimulus	mitochondrion;nucleus	catalytic activity;nucleotide binding;protein binding	Pf00350, Pf00625, Pf01926, Pf02421, Pf08477, Pf10396, Pf12631, Pf13521	84705	ENSG00000130299.16	GTPBP3	19			0	1.065	0.596	0.811	1.691	1.069	0.09	-0.75	-0.3	0.76	0.1	0.931016	0.607568	0.84734	0.518891	0.989349	45.11	24.09	45.79	75.11	79.74	137.1
FALSE	Low	Master Protein	Q68DL7	Uncharacterized protein C18orf63 OS=Homo sapiens OX=9606 GN=C18orf63 PE=2 SV=2	0.1	FALSE	1.38	1	1	1	1	1	685	77.2	9.8	0	1					644041	ENSG00000206043.6	C18orf63	18			0	1.056	0.056	0.089	1.691	0.094	0.08	-4.17	-3.49	0.76	-3.41	0.980554	1.34205e-10	4.75658e-11	0.872949	4.79691e-08	11.56	0.04	0	0	0.1	181.4
FALSE	High	None	Q8NFD5	AT-rich interactive domain-containing protein 1B OS=Homo sapiens OX=9606 GN=ARID1B PE=1 SV=2	0	FALSE	7.946	1	1	4	1	1	2236	236	6.73	3.54	1	cell communication;cell organization and biogenesis;metabolic process;regulation of biological process;response to stimulus	cytoplasm;cytosol;membrane;nucleus	DNA binding;protein binding	Pf01388, Pf03153, Pf09770, Pf12031	57492	ENSG00000049618.22	ARID1B	6			0	1.209	0.95	1.327	1.688	1.604	0.27	-0.07	0.41	0.76	0.68	0.894836	0.999876	0.94153	0.644142	0.815771	45.32	0	42.4	57.3	57.3	84
FALSE	High	Master Protein	P51808	Dynein light chain Tctex-type 3 OS=Homo sapiens OX=9606 GN=DYNLT3 PE=1 SV=1	0	FALSE	7.261	15	1	2	1	1	116	13.1	5.66	6.78	1	cell division;regulation of biological process;transport	chromosome;cytoplasm;cytoskeleton;nucleus	catalytic activity;motor activity;protein binding	Pf03645	6990	ENSG00000165169.10	DYNLT3	X			0	0.511	0.288	0.991	1.685	0.532	-0.97	-1.8	-0.01	0.75	-0.91	0.0946448	0.0628528	0.995258	0.817688	0.485676	25.22	3.82	84.82	35.31	17.85	189.2
FALSE	High	Master Protein	Q9BUE6	Iron-sulfur cluster assembly 1 homolog, mitochondrial OS=Homo sapiens OX=9606 GN=ISCA1 PE=1 SV=1	0.002	FALSE	4.805	10	1	2	1	1	129	14.2	9.07	4.87	1	cell organization and biogenesis;metabolic process	mitochondrion;organelle lumen	metal ion binding;structural molecule activity	Pf01521	81689	ENSG00000135070.14	ISCA1	9			0	0.701	0.909	1.829	1.683	1.282	-0.51	-0.14	0.87	0.75	0.36	0.38766	0.999876	0.374765	0.566679	0.917424	1.12	30.44	48.32	40.47	47.58	102.8
FALSE	High	None	P27216	Annexin A13 OS=Homo sapiens OX=9606 GN=ANXA13 PE=1 SV=3	0.004	FALSE	4.062	3	1	6	1	1	316	35.4	5.6	10.4	1	cell differentiation;regulation of biological process	membrane	metal ion binding	Pf00191	312	ENSG00000104537.16	ANXA13	8			0	0.581	0.96	1.776	1.683	1.032	-0.78	-0.06	0.83	0.75	0.05	0.053427	0.999876	0.426432	0.556156	0.999325	0	44.43	67.36	76.83	67.36	111.9
FALSE	High	Master Protein	Q13795	ADP-ribosylation factor-related protein 1 OS=Homo sapiens OX=9606 GN=ARFRP1 PE=1 SV=1	0	FALSE	9.129	14	2	4	2	1	201	22.6	7.56	9.09	2	cell organization and biogenesis;regulation of biological process;response to stimulus;transport	cytosol;Golgi;membrane	catalytic activity;nucleotide binding;protein binding;signal transducer activity	Pf00025, Pf00071, Pf00503, Pf01926, Pf04670, Pf08477, Pf09439	10139	ENSG00000101246.19	ARFRP1	20			0	0.958	1.037	1.121	1.682	1.507	-0.06	0.05	0.17	0.75	0.59	0.981907	0.982246	0.994465	0.691369	0.875718	44.36	44.08	56.82	73.7	46.77	94.9
FALSE	High	Master Protein	P09958	Furin OS=Homo sapiens OX=9606 GN=FURIN PE=1 SV=2	0.001	FALSE	6.243	3	2	2	2	1	794	86.6	6.47	2.18	2	cell death;cell organization and biogenesis;cell proliferation;metabolic process;regulation of biological process;response to stimulus;transport	cell surface;endoplasmic reticulum;endosome;extracellular;Golgi;membrane;organelle lumen	catalytic activity;enzyme regulator activity;metal ion binding;protein binding	Pf00082, Pf01483, Pf03302, Pf14843	5045	ENSG00000140564.11	FURIN	15	Influenza A		0	1.378	1.199	1.177	1.682	2.091	0.46	0.26	0.23	0.75	1.06	0.729747	0.920856	0.988797	0.792527	0.430419	75.8	27.24	28.96	27.12	32.7	64.5
FALSE	High	Master Protein	O00592	Podocalyxin OS=Homo sapiens OX=9606 GN=PODXL PE=1 SV=2	0	FALSE	7.199	4	2	16	2	1	558	58.6	5.49	27.69	2	cellular component movement;regulation of biological process	cytoplasm;membrane	protein binding	Pf05109, Pf06365	5420	ENSG00000128567.16	PODXL	7		Primary Focal Segmental Glomerulosclerosis FSGS; Ectoderm Differentiation; Hepatitis C and Hepatocellular Carcinoma	0	1.037	0.912	1.479	1.681	1.534	0.05	-0.13	0.57	0.75	0.62	0.955399	0.999876	0.456701	0.15786	0.448403	45.67	36.53	38.97	38.69	27.34	98.2
FALSE	High	Master Protein	Q9HA65	TBC1 domain family member 17 OS=Homo sapiens OX=9606 GN=TBC1D17 PE=1 SV=2	0	FALSE	8.074	3	2	3	2	1	648	72.7	5.19	6.58	2	metabolic process;regulation of biological process;transport	cytosol;endosome;vacuole	enzyme regulator activity;protein binding	Pf00566, Pf12068	79735		TBC1D17	19			0	1.327	0.848	1.085	1.68	1.386	0.41	-0.24	0.12	0.75	0.47	0.570965	0.978801	0.99903	0.559881	0.846431	18.18	15.84	30.4	29.03	21.57	66.6
FALSE	High	Master Protein	P67936	Tropomyosin alpha-4 chain OS=Homo sapiens OX=9606 GN=TPM4 PE=1 SV=3	0	FALSE	117.992	51	17	159	8	1	248	28.5	4.69	505.38	17	cell differentiation;cell organization and biogenesis;cellular component movement	cytoplasm;cytoskeleton;cytosol;membrane	metal ion binding;protein binding;structural molecule activity	Pf00261, Pf12718	7171	ENSG00000167460.14	TPM4	19	Dilated cardiomyopathy; Adrenergic signaling in cardiomyocytes; Cardiac muscle contraction; Hypertrophic cardiomyopathy (HCM)	Striated Muscle Contraction	9	0.932	0.823	1.552	1.679	1.222	-0.1	-0.28	0.63	0.75	0.29	0.931016	0.962137	0.0163418	0.000285906	0.538273	57.16	69.76	60.4	96.89	84.07	120
FALSE	Low	Master Protein	Q6ZQY2	Leucine-rich repeat-containing protein 74B OS=Homo sapiens OX=9606 GN=LRRC74B PE=2 SV=3	0.158	FALSE	1.065	2	1	2	1	1	392	41.6	5.1	0	1			protein binding		400891	ENSG00000187905.10	LOC400891; LRRC74B	22			0	1.704	0.635	0.552	1.679	0.941	0.77	-0.65	-0.86	0.75	-0.09	0.324081	0.869412	0.444327	0.846864	0.980964	172.21	46.2	14.57	100.39	111.11	95.1
FALSE	High	Master Protein	P48200	Iron-responsive element-binding protein 2 OS=Homo sapiens OX=9606 GN=IREB2 PE=1 SV=4	0	FALSE	31.336	12	7	19	7	1	963	105	7.05	46.13	7											0	1.029	0.452	0.724	1.678	0.73	0.04	-1.15	-0.47	0.75	-0.45	0.958284	0.171057	0.502727	0.464413	0.706016	25	8.51	13.8	50.2	19.97	150.7
FALSE	High	Master Protein	Q99470	Stromal cell-derived factor 2 OS=Homo sapiens OX=9606 GN=SDF2 PE=1 SV=2	0	FALSE	19.057	22	2	6	2	1	211	23	7.33	28.9	2	metabolic process;response to stimulus	extracellular;membrane	catalytic activity	Pf02815	6388	ENSG00000132581.9	SDF2	17			0	1.073	0.779	0.923	1.678	1.12	0.1	-0.36	-0.12	0.75	0.16	0.949834	0.934681	0.970956	0.536935	0.97785	55.22	58.84	54.99	96.53	64.27	110.6
FALSE	Medium	Master Protein	Q9GZU7	Carboxy-terminal domain RNA polymerase II polypeptide A small phosphatase 1 OS=Homo sapiens OX=9606 GN=CTDSP1 PE=1 SV=1	0.015	FALSE	2.906	4	1	1	1	1	261	29.2	6	1.67	1	metabolic process;regulation of biological process	nucleus	catalytic activity;metal ion binding;protein binding	Pf03031	58190	ENSG00000144579.7	CTDSP1	2		mir-124 predicted interactions with cell cycle and differentiation	0	0.824	0.957	2.305	1.677	1.898	-0.28	-0.06	1.2	0.75	0.92	0.871121	0.999876	0.0966546	0.551277	0.472223	12.28	2.75	99.27	92.84	112.12	85.5
FALSE	High	Master Protein	Q9GZT9	Egl nine homolog 1 OS=Homo sapiens OX=9606 GN=EGLN1 PE=1 SV=1	0	FALSE	8.724	6	1	6	1	1	426	46	8.53	27.21	1	cellular homeostasis;metabolic process;regulation of biological process;response to stimulus	cytoplasm;cytosol;nucleus	catalytic activity;metal ion binding;protein binding	Pf01753, Pf03171, Pf13640, Pf13661	54583	ENSG00000135766.8	EGLN1	1	HIF-1 signaling pathway; Pathways in cancer; Renal cell carcinoma	Photodynamic therapy-induced HIF-1 survival signaling	0	1.214	1.593	1.273	1.677	1.545	0.28	0.67	0.35	0.75	0.63	0.895468	0.658459	0.966571	0.712735	0.853525	44.88	76.65	13.91	34.17	44.73	85.9
FALSE	High	Master Protein	Q8N6L1	Keratinocyte-associated protein 2 OS=Homo sapiens OX=9606 GN=KRTCAP2 PE=1 SV=2	0.001	FALSE	5.567	13	1	1	1	1	136	14.7	9.61	2.76	1	metabolic process	endoplasmic reticulum;membrane		Pf09775	200185		KRTCAP2	1			0	0.882	0.99	1.743	1.677	1.659	-0.18	-0.02	0.8	0.75	0.73	0.905243	0.999876	0.432201	0.52752	0.54527	31.52	29.32	46.56	23.19	41.15	80
FALSE	High	Master Protein	Q16763	Ubiquitin-conjugating enzyme E2 S OS=Homo sapiens OX=9606 GN=UBE2S PE=1 SV=2	0	FALSE	15.474	15	3	15	3	1	222	23.8	8.38	35.02	3	cell division;cell organization and biogenesis;metabolic process	cytoplasm;cytosol	catalytic activity;nucleotide binding;protein binding	Pf00179	27338	ENSG00000108106.13	UBE2S	19	Ubiquitin mediated proteolysis		0	0.759	0.353	0.817	1.675	0.638	-0.4	-1.5	-0.29	0.74	-0.65	0.154897	0.00102133	0.694004	0.141962	0.33568	21.62	5.49	25.74	41.56	15.15	132
FALSE	High	Master Protein	Q9H0L4	Cleavage stimulation factor subunit 2 tau variant OS=Homo sapiens OX=9606 GN=CSTF2T PE=1 SV=1	0	FALSE	63.025	27	10	40	2	1	616	64.4	7.25	120.35	10	metabolic process	nucleus	protein binding;RNA binding	Pf00076, Pf13893, Pf14259, Pf14304, Pf14327	23283	ENSG00000177613.8	CSTF2T	10	mRNA surveillance pathway	mRNA Processing	0	1.215	1.005	1.195	1.675	1.96	0.28	0.01	0.26	0.74	0.97	0.812041	0.999876	0.985712	0.468814	0.210423	70.08	75.21	41.26	55.38	39.16	78.2
FALSE	High	Master Protein	Q9UH03	Neuronal-specific septin-3 OS=Homo sapiens OX=9606 GN=SEPT3 PE=1 SV=3	0	FALSE	10.692	15	4	5	4	1	358	40.7	7.2	9.41	4	cell division	cytoplasm;cytoskeleton	catalytic activity;nucleotide binding;protein binding	Pf00735, Pf01926, Pf03193	55964	ENSG00000100167.19	SEPT3	22	Bacterial invasion of epithelial cells		0	1.416	0.748	0.783	1.673	1.113	0.5	-0.42	-0.35	0.74	0.15	0.102779	0.91531	0.781557	0.539199	0.979068	37.98	57.68	35.76	39.02	98.76	130.5
FALSE	Low	Master Protein	Q96JP5	E3 ubiquitin-protein ligase ZFP91 OS=Homo sapiens OX=9606 GN=ZFP91 PE=1 SV=1	0.065	FALSE	1.704	4	1	2	1	1	570	63.4	7.36	0	1	metabolic process;regulation of biological process	nucleus	catalytic activity;metal ion binding	Pf13465	80829	ENSG00000186660.14	ZFP91	11			0	1.221	0.46	0.8	1.668	0.768	0.29	-1.12	-0.32	0.74	-0.38	0.891798	0.642976	0.915291	0.878069	0.91515	24	12.03	54.07	68.71	40.49	116
FALSE	High	Master Protein	Q8NHZ8	Anaphase-promoting complex subunit CDC26 OS=Homo sapiens OX=9606 GN=CDC26 PE=1 SV=1	0.002	FALSE	4.479	14	1	1	1	1	85	9.8	6.81	2.95	1	cell division;metabolic process;regulation of biological process	cytosol;nucleus	protein binding	Pf10471	246184	ENSG00000176386.8	CDC26	9	Ubiquitin mediated proteolysis; Progesterone-mediated oocyte maturation; HTLV-I infection; Oocyte meiosis; Cell cycle		0	0.878	0.633	0.713	1.668	0.953	-0.19	-0.66	-0.49	0.74	-0.07	0.904314	0.835075	0.72479	0.807307	0.969017	8.86	44.53	47.15	127.78	53.02	150.3
FALSE	High	Master Protein	Q5VWQ0	Lysine-specific demethylase 9 OS=Homo sapiens OX=9606 GN=RSBN1 PE=1 SV=2	0	FALSE	7.118	3	2	3	2	1	802	90	8.6	4.41	2		nucleus			54665	ENSG00000081019.13	RSBN1	1			0	1.033	0.907	1.194	1.666	1.237	0.05	-0.14	0.26	0.74	0.31	0.981907	0.999876	0.979704	0.52752	0.926774	42.63	54.33	66.15	66.04	49.06	93.8
FALSE	High	Master Protein	O95707	Ribonuclease P protein subunit p29 OS=Homo sapiens OX=9606 GN=POP4 PE=1 SV=2	0	FALSE	12.781	9	2	7	2	1	220	25.4	10.07	11.37	2	metabolic process	nucleus	catalytic activity;protein binding;RNA binding	Pf01868	10775	ENSG00000105171.9	POP4	19	Ribosome biogenesis in eukaryotes; RNA transport		0	0.728	0.8	3.674	1.664	1.169	-0.46	-0.32	1.88	0.73	0.23	0.759903	0.973826	0.00278471	0.58623	0.972261	63.7	81.58	164.36	91.06	114.42	102.5
FALSE	High	Master Protein	Q06323	Proteasome activator complex subunit 1 OS=Homo sapiens OX=9606 GN=PSME1 PE=1 SV=1	0	FALSE	165.411	72	19	214	19	1	249	28.7	6.02	643.54	19	metabolic process;regulation of biological process;response to stimulus;transport	cytoplasm;cytosol;proteasome	enzyme regulator activity;protein binding	Pf02251, Pf02252	5720	ENSG00000092010.14	PSME1	14	Proteasome; Antigen processing and presentation	Proteasome Degradation	0	0.891	0.906	1.626	1.662	1.489	-0.17	-0.14	0.7	0.73	0.57	0.650646	0.999876	0.00482618	0.000452238	0.0308957	44.18	67.06	50.69	82.39	70.19	123
FALSE	High	Master Protein	Q9Y4E5	E3 SUMO-protein ligase ZNF451 OS=Homo sapiens OX=9606 GN=ZNF451 PE=1 SV=2	0	FALSE	13.748	4	4	4	4	1	1061	121.4	6.77	4.11	4	metabolic process;regulation of biological process	nucleus	catalytic activity;metal ion binding;protein binding		26036	ENSG00000112200.16	ZNF451	6			0	1.074	0.796	0.943	1.662	1.023	0.1	-0.33	-0.08	0.73	0.03	0.975156	0.980861	0.988797	0.8013	0.995752	42.7	2.96	35.65	30.41	36.8	124.9
FALSE	Medium	Master Protein	Q8NBK3	Formylglycine-generating enzyme OS=Homo sapiens OX=9606 GN=SUMF1 PE=1 SV=3	0.021	FALSE	2.592	4	1	4	1	1	374	40.5	6.65	0	1	metabolic process	endoplasmic reticulum;organelle lumen	catalytic activity;metal ion binding;protein binding	Pf03781	285362	ENSG00000144455.13	SUMF1	3	Lysosome		0	1.086	0.771	1.18	1.662	1.281	0.12	-0.38	0.24	0.73	0.36	0.952508	0.97892	0.988797	0.851889	0.926774	32.25	16.12	73.85	76.34	73.64	94.8
FALSE	Medium	Master Protein	P14621	Acylphosphatase-2 OS=Homo sapiens OX=9606 GN=ACYP2 PE=1 SV=2	0.025	FALSE	2.399	8	1	1	1	1	99	11.1	9.5	2.1	1	metabolic process		catalytic activity;protein binding	Pf00708	98	ENSG00000170634.12	ACYP2	2	Pyruvate metabolism		0	1.062	1.154	1.417	1.661	1.919	0.09	0.21	0.5	0.73	0.94	0.972729	0.953647	0.825618	0.584545	0.314128	47.3	21.24	96.41	58.42	58.42	77.9
FALSE	High	Master Protein	O14530	Thioredoxin domain-containing protein 9 OS=Homo sapiens OX=9606 GN=TXNDC9 PE=1 SV=2	0	FALSE	15.585	14	3	9	3	1	226	26.5	5.88	19.82	3	cellular homeostasis;metabolic process;regulation of biological process	cytoplasm;cytoskeleton;nucleus	catalytic activity;protein binding	Pf00085	10190	ENSG00000115514.11	TXNDC9	2			0	1.054	0.673	0.863	1.66	1.137	0.08	-0.57	-0.21	0.73	0.19	0.957553	0.791156	0.94153	0.583517	0.9696	49.08	29.3	34.61	58.18	50.97	114.7
FALSE	Low	Master Protein	P51801	Chloride channel protein ClC-Kb OS=Homo sapiens OX=9606 GN=CLCNKB PE=1 SV=3	0.176	FALSE	1	2	1	1	1	1	687	75.4	8	0	1	regulation of biological process;transport	membrane	metal ion binding;transporter activity	Pf00571, Pf00654	1188	ENSG00000184908.17	CLCNKB	1	Collecting duct acid secretion		0	0.908	0.943	1.696	1.66	1.517	-0.14	-0.09	0.76	0.73	0.6	0.947879	0.999876	0.531256	0.59872	0.79596	32.77	26.07	22.85	39.03	29.89	86.1
FALSE	High	Master Protein Candidate	Q8WXF0	Serine/arginine-rich splicing factor 12 OS=Homo sapiens OX=9606 GN=SRSF12 PE=2 SV=1	0.006	FALSE	3.586	5	1	3	1	1	261	30.5	11.69	8.09	1	cell organization and biogenesis;metabolic process;regulation of biological process	nucleus	protein binding;RNA binding	Pf00076, Pf13893, Pf14259	135295	ENSG00000154548.8	SRSF12	6			0	0.404	0.549	2.253	1.659	0.91	-1.31	-0.87	1.17	0.73	-0.14	0.0495435	0.737191	0.251264	0.844117	0.974738	9.1	12.77	79.14	50.23	14.97	139.7
FALSE	High	Master Protein	O75494	Serine/arginine-rich splicing factor 10 OS=Homo sapiens OX=9606 GN=SRSF10 PE=1 SV=1	0.006	FALSE	3.586	5	1	3	1	1	262	31.3	11.27	8.09	1	cell organization and biogenesis;metabolic process;regulation of biological process;transport	cytoplasm;cytosol;nucleus	protein binding;RNA binding	Pf00076, Pf13893, Pf14259	10772	ENSG00000188529.14	SRSF10; LOC100996657	1	Spliceosome	mRNA Processing	0	0.404	0.549	2.253	1.659	0.91	-1.31	-0.87	1.17	0.73	-0.14	0.0495435	0.737191	0.251264	0.844117	0.974738	9.1	12.77	79.14	50.23	14.97	139.7
FALSE	High	Master Protein	Q9BV23	Monoacylglycerol lipase ABHD6 OS=Homo sapiens OX=9606 GN=ABHD6 PE=1 SV=1	0	FALSE	8.374	9	2	3	2	1	337	38.3	8.41	4.08	2	metabolic process;regulation of biological process	membrane;mitochondrion	catalytic activity	Pf00561, Pf12695, Pf12697	57406	ENSG00000163686.14	ABHD6	3	Retrograde endocannabinoid signaling		0	1.011	0.565	0.927	1.658	1.086	0.02	-0.82	-0.11	0.73	0.12	0.991154	0.487608	0.985659	0.583517	0.994683	98.7	11.03	86.07	45.02	22.01	71.6
FALSE	High	Master Protein	P05362	Intercellular adhesion molecule 1 OS=Homo sapiens OX=9606 GN=ICAM1 PE=1 SV=2	0.006	FALSE	3.573	3	1	2	1	1	532	57.8	7.99	0	1	cell communication;cell organization and biogenesis;cellular component movement;cellular homeostasis;defense response;regulation of biological process;response to stimulus	cell surface;membrane	protein binding;receptor activity;signal transducer activity	Pf03921, Pf07679, Pf13895	3383	ENSG00000090339.8	ICAM1	19	TNF signaling pathway; Epstein-Barr virus infection; Cell adhesion molecules (CAMs); Natural killer cell mediated cytotoxicity; NF-kappa B signaling pathway; AGE-RAGE signaling pathway in diabetic complications; HTLV-I infection; Malaria; Leukocyte transendothelial migration; Viral myocarditis; Staphylococcus aureus infection; Influenza A; African trypanosomiasis; Rheumatoid arthritis	Vitamin B12 Metabolism; Folate Metabolism; VEGFA-VEGFR2 Signaling Pathway; IL1 and megakaryocytes in obesity; RANKL/RANK (Receptor activator of NFKB (ligand)) Signaling Pathway; Type II interferon signaling (IFNG); Selenium Micronutrient Network; Spinal Cord Injury; Photodynamic therapy-induced NF-kB survival signaling; Interleukin-11 Signaling Pathway	0	1.135	0.553	0.868	1.658	0.818	0.18	-0.85	-0.2	0.73	-0.29	0.931016	0.791974	0.966571	0.86499	0.935707	38.7	8.54	25.26	38.69	13.61	114.1
FALSE	High	Master Protein	O14874	[3-methyl-2-oxobutanoate dehydrogenase [lipoamide]] kinase, mitochondrial OS=Homo sapiens OX=9606 GN=BCKDK PE=1 SV=2	0	FALSE	19.423	14	3	17	3	1	412	46.3	8.82	40.3	3	metabolic process	mitochondrion;organelle lumen	catalytic activity;nucleotide binding;protein binding	Pf02518, Pf10436	10295	ENSG00000103507.13	BCKDK	16			0	1.074	0.814	1.216	1.656	1.348	0.1	-0.3	0.28	0.73	0.43	0.947443	0.969362	0.969967	0.55916	0.867914	35.92	30.57	40.79	65.74	10.4	94
FALSE	High	Master Protein	Q9UKV5	E3 ubiquitin-protein ligase AMFR OS=Homo sapiens OX=9606 GN=AMFR PE=1 SV=2	0	FALSE	29.086	16	5	5	5	1	643	72.9	6.39	15.8	5	cell organization and biogenesis;cellular component movement;metabolic process;regulation of biological process;response to stimulus	cytoplasm;endoplasmic reticulum;Golgi;membrane;nucleus	catalytic activity;metal ion binding;protein binding;receptor activity	Pf00097, Pf02845, Pf12678, Pf12861, Pf13639, Pf13920, Pf13923, Pf14634, Pf15227	267	ENSG00000159461.14	AMFR	16	Protein processing in endoplasmic reticulum	Sterol Regulatory Element-Binding Proteins (SREBP) signalling	0	0.813	0.425	0.783	1.655	0.602	-0.3	-1.24	-0.35	0.73	-0.73	0.829971	0.18098	0.911133	0.71046	0.627353	21.56	8.55	15.02	40.61	17.36	127.3
FALSE	Medium	None	Q15303	Receptor tyrosine-protein kinase erbB-4 OS=Homo sapiens OX=9606 GN=ERBB4 PE=1 SV=1	0.045	FALSE	1.995	1	1	1	0	2	1308	146.7	6.39	0	1	cell death;cell differentiation;cell organization and biogenesis;cell proliferation;cellular component movement;development;metabolic process;regulation of biological process;response to stimulus;transport	cytosol;extracellular;membrane;mitochondrion;nucleus;organelle lumen	catalytic activity;DNA binding;nucleotide binding;protein binding;receptor activity;signal transducer activity	Pf00069, Pf00757, Pf01030, Pf03302, Pf07714, Pf14843	2066	ENSG00000178568.14	ERBB4	2	Endocytosis; ErbB signaling pathway; Proteoglycans in cancer; Calcium signaling pathway	Association Between Physico-Chemical Features and Toxicity Associated Pathways; ErbB Signaling Pathway; EV release from cardiac cells and their functional effects	0	0.786	0.707	1.335	1.654	1.326	-0.35	-0.5	0.42	0.73	0.41	0.807365	0.844832	0.925825	0.57925	0.91238	53.86	13.42	116.74	115.32	117.78	122.7
FALSE	High	Master Protein	Q6PID6	Tetratricopeptide repeat protein 33 OS=Homo sapiens OX=9606 GN=TTC33 PE=1 SV=2	0.009	FALSE	3.269	4	1	1	1	1	262	29.4	5.44	1.92	1			protein binding	Pf07719, Pf13414	23548	ENSG00000113638.13	TTC33	5			0	0.94	0.672	1.099	1.651	1.109	-0.09	-0.57	0.14	0.72	0.15	0.970043	0.90553	0.996341	0.815276	0.993136	14.78	9.54	44.87	21.48	25.49	105.8
FALSE	High	Master Protein	Q9HA77	Probable cysteine--tRNA ligase, mitochondrial OS=Homo sapiens OX=9606 GN=CARS2 PE=1 SV=1	0	FALSE	27.241	17	6	23	6	1	564	62.2	8.34	42.5	6	metabolic process	cytoplasm;mitochondrion;organelle lumen	catalytic activity;metal ion binding;nucleotide binding	Pf00133, Pf01406, Pf01921, Pf09334	79587	ENSG00000134905.16	CARS2	13	Aminoacyl-tRNA biosynthesis		0	1.12	0.869	1.101	1.651	1.062	0.16	-0.2	0.14	0.72	0.09	0.853978	0.982246	0.988797	0.239207	0.985678	38.88	49.81	58.61	62.25	48.9	110.8
FALSE	High	Master Protein	P84098	60S ribosomal protein L19 OS=Homo sapiens OX=9606 GN=RPL19 PE=1 SV=1	0	FALSE	54.822	35	9	67	8	1	196	23.5	11.47	192.56	9	cell organization and biogenesis;metabolic process;transport	cytosol;membrane;ribosome	protein binding;RNA binding;structural molecule activity	Pf01280	6143	ENSG00000108298.9	RPL19	17	Ribosome	Cytoplasmic Ribosomal Proteins	0	0.943	0.633	1.16	1.649	0.861	-0.08	-0.66	0.21	0.72	-0.22	0.966235	0.463339	0.881892	0.0132146	0.88909	30.1	24.75	57.69	73.2	32.88	113.7
FALSE	Medium	Master Protein	Q9BV81	ER membrane protein complex subunit 6 OS=Homo sapiens OX=9606 GN=EMC6 PE=1 SV=1	0.01	FALSE	3.177	9	1	1	1	1	110	12	10.07	2.09	1	cell organization and biogenesis;metabolic process	endoplasmic reticulum;membrane	protein binding	Pf07019	83460	ENSG00000127774.6	EMC6	17			0	0.789	0.569	0.841	1.647	0.736	-0.34	-0.81	-0.25	0.72	-0.44	0.868581	0.784849	0.959036	0.863622	0.887749	13.78	16.67	18.18	71.41	20.67	142.5
FALSE	High	Master Protein	P08123	Collagen alpha-2(I) chain OS=Homo sapiens OX=9606 GN=COL1A2 PE=1 SV=7	0	FALSE	20.385	5	4	6	4	1	1366	129.2	8.95	16.51	4	cell organization and biogenesis;cellular component movement;coagulation;metabolic process;regulation of biological process;response to stimulus	endoplasmic reticulum;extracellular;organelle lumen	metal ion binding;protein binding;structural molecule activity	Pf01391, Pf01410	1278	ENSG00000164692.17	COL1A2	7	Amoebiasis; Protein digestion and absorption; AGE-RAGE signaling pathway in diabetic complications; Focal adhesion; ECM-receptor interaction; PI3K-Akt signaling pathway; Platelet activation	TGF-beta Signaling Pathway; Focal Adhesion-PI3K-Akt-mTOR-signaling pathway; Inflammatory Response Pathway; Focal Adhesion; miRNA targets in ECM and membrane receptors	0	0.619	1.278	1.669	1.647	2.105	-0.69	0.35	0.74	0.72	1.07	0.38766	0.872338	0.516479	0.555502	0.161215	5.51	0	67.78	52.18	52.18	64.4
FALSE	High	Master Protein	Q15650	Activating signal cointegrator 1 OS=Homo sapiens OX=9606 GN=TRIP4 PE=1 SV=4	0	FALSE	8.877	9	2	4	2	1	581	66.1	7.85	7.13	2	metabolic process;regulation of biological process;response to stimulus;transport	cytoplasm;cytoskeleton;cytosol;nucleus	catalytic activity;metal ion binding;protein binding	Pf02614, Pf04266, Pf06221	9325	ENSG00000103671.9	TRIP4	15			0	1.164	1.017	1.275	1.647	1.694	0.22	0.02	0.35	0.72	0.76	0.922665	0.993977	0.965826	0.70284	0.792858	27.97	17.03	15.54	8.08	13.35	79.2
FALSE	High	Master Protein	P41212	Transcription factor ETV6 OS=Homo sapiens OX=9606 GN=ETV6 PE=1 SV=1	0	FALSE	13.678	10	3	5	3	1	452	53	7.43	12.86	3	cell death;cell differentiation;cell organization and biogenesis;cell proliferation;metabolic process;regulation of biological process	cytosol;nucleus	DNA binding;protein binding	Pf00178, Pf02198	2120	ENSG00000139083.10	ETV6	12	Dorso-ventral axis formation; Transcriptional misregulation in cancer	Hematopoietic Stem Cell Gene Regulation by GABP alpha/beta Complex; Exercise-induced Circadian Regulation	0	1.618	1.351	1.941	1.646	1.944	0.69	0.43	0.96	0.72	0.96	0.45023	0.839074	0.490927	0.70284	0.54527	58.26	29.17	70.87	79.64	58.45	50.3
FALSE	Medium	None	Q9NYC9	Dynein heavy chain 9, axonemal OS=Homo sapiens OX=9606 GN=DNAH9 PE=1 SV=3	0.035	FALSE	2.173	0	1	6	0	2	4486	511.6	5.91	13.03	1	cell organization and biogenesis;cellular component movement	cytoplasm;cytoskeleton	catalytic activity;motor activity;nucleotide binding;protein binding	Pf03028, Pf07728, Pf08385, Pf08393, Pf12774, Pf12775, Pf12777, Pf12780, Pf12781	1770	ENSG00000007174.17	DNAH9	17	Huntington's disease		0	0.833	0.538	0.966	1.645	0.804	-0.26	-0.89	-0.05	0.72	-0.31	0.834671	0.530392	0.988797	0.562699	0.852747	22.91	13.32	43.22	46.76	23.1	116
FALSE	High	Master Protein	Q9BRT9	DNA replication complex GINS protein SLD5 OS=Homo sapiens OX=9606 GN=GINS4 PE=1 SV=1	0	FALSE	8.456	12	2	4	2	1	223	26	4.98	8.01	2	cell proliferation;metabolic process;response to stimulus	cytoplasm;nucleus	catalytic activity;protein binding	Pf05916	84296	ENSG00000147536.11	GINS4	8			0	0.963	0.657	1.178	1.642	1.108	-0.05	-0.61	0.24	0.72	0.15	0.98899	0.84148	0.985712	0.60877	0.989349	25.97	4.21	36.78	19.69	19.67	104.6
FALSE	High	Master Protein	O14757	Serine/threonine-protein kinase Chk1 OS=Homo sapiens OX=9606 GN=CHEK1 PE=1 SV=2	0	FALSE	12.224	8	3	6	3	1	476	54.4	8.25	13.54	3	cell death;cell organization and biogenesis;metabolic process;regulation of biological process;response to stimulus	chromosome;cytoplasm;cytoskeleton;cytosol;nucleus	catalytic activity;nucleotide binding;protein binding	Pf00069, Pf07714, Pf14531	1111	ENSG00000149554.12	CHEK1	11	Viral carcinogenesis; HTLV-I infection; p53 signaling pathway; Cell cycle	DNA Damage Response; Retinoblastoma (RB) in Cancer; ATM Signaling Network in Development and Disease; miRNA Regulation of DNA Damage Response; Cell Cycle; ATR Signaling	0	1.115	0.718	1.239	1.641	1.161	0.16	-0.48	0.31	0.71	0.22	0.891331	0.868248	0.966571	0.257466	0.964847	49.66	35.54	40.55	54.22	27.83	59.5
FALSE	Low	None	Q2QD12	Ribulose-phosphate 3-epimerase-like protein 1 OS=Homo sapiens OX=9606 GN=RPEL1 PE=2 SV=1	0.072	FALSE	1.656	3	1	3	1	1	228	25	5.41	1.7	1	metabolic process	cytosol	catalytic activity;metal ion binding	Pf00834	729020	ENSG00000235376.5	LOC729020; RPEL1	10	Carbon metabolism; Pentose phosphate pathway; Biosynthesis of amino acids; Pentose and glucuronate interconversions; Metabolic pathways		0	1.624	0.974	1.044	1.638	1.695	0.7	-0.04	0.06	0.71	0.76	0.377326	0.999876	0.999922	0.692657	0.752475	33.59	18.02	29.53	22.54	19.15	75.6
FALSE	Medium	Master Protein	Q9Y296	Trafficking protein particle complex subunit 4 OS=Homo sapiens OX=9606 GN=TRAPPC4 PE=1 SV=1	0.021	FALSE	2.594	4	1	1	1	1	219	24.3	6.21	1.76	1	cell organization and biogenesis;transport	cytosol;endoplasmic reticulum;Golgi;membrane	protein binding	Pf04099, Pf04628	51399	ENSG00000280495.4; ENSG00000196655.11	TRAPPC4	11; CHR_HG2217_PATCH			0	0.713	0.507	1.164	1.637	0.831	-0.49	-0.98	0.22	0.71	-0.27	0.0212387	0.100829	0.94153	0.0352848	0.791966	0	6.61	0	28.5	0	131.1
FALSE	High	Master Protein	Q9NS87	Kinesin-like protein KIF15 OS=Homo sapiens OX=9606 GN=KIF15 PE=1 SV=1	0	FALSE	25.39	5	5	9	5	1	1388	160.1	6	21.23	5	cell proliferation;cellular component movement;metabolic process;transport	cytoplasm;cytoskeleton;cytosol;membrane	catalytic activity;DNA binding;motor activity;nucleotide binding;protein binding;transporter activity	Pf00225, Pf01496, Pf02463, Pf04111, Pf05622, Pf08317, Pf12128, Pf12711, Pf13166, Pf13514, Pf15619	56992	ENSG00000280610.2; ENSG00000163808.16	KIF15	3; CHR_HG2066_PATCH		Gastric Cancer Network 1	0	1.031	0.601	0.822	1.637	0.91	0.04	-0.74	-0.28	0.71	-0.14	0.957723	0.710684	0.875111	0.608725	0.934089	53.98	12.75	42.21	9.54	17.74	150.8
FALSE	High	Master Protein	Q9UL18	Protein argonaute-1 OS=Homo sapiens OX=9606 GN=AGO1 PE=1 SV=3	0	FALSE	27.65	12	7	21	3	1	857	97.2	9.16	60.08	7	cell organization and biogenesis;metabolic process;regulation of biological process;response to stimulus	cytoplasm;cytosol;nucleus	catalytic activity;DNA binding;protein binding;RNA binding	Pf02170, Pf02171, Pf08699	26523	ENSG00000092847.11	AGO1; EIF2C1	1			1	1.222	0.867	0.85	1.636	1.22	0.29	-0.21	-0.24	0.71	0.29	0.863173	0.981938	0.933365	0.553866	0.934089	56.91	57.79	52.59	86.57	111.33	76
FALSE	High	Master Protein	Q15800	Methylsterol monooxygenase 1 OS=Homo sapiens OX=9606 GN=MSMO1 PE=1 SV=1	0	FALSE	15.524	13	3	16	3	1	293	35.2	7.23	37.59	3	metabolic process	endoplasmic reticulum;membrane	catalytic activity;metal ion binding	Pf04116	6307	ENSG00000052802.12	MSMO1	4	Steroid biosynthesis; Metabolic pathways	Cholesterol Biosynthesis	0	0.94	0.481	0.695	1.635	0.685	-0.09	-1.06	-0.52	0.71	-0.55	0.955182	0.241518	0.406784	0.507922	0.515271	19.12	15.07	23.66	51.74	17.42	139.3
FALSE	High	None	Q6P474	Putative pyridoxal-dependent decarboxylase domain-containing protein 2 OS=Homo sapiens OX=9606 GN=PDXDC2P PE=5 SV=3	0	FALSE	51.499	18	5	29	5	1	469	51.8	5.96	100.98	5	metabolic process		catalytic activity	Pf00282, Pf01212	283970		PDXDC2P; PDXDC2P-NPIPB14P	16			0	1.349	1.223	1.425	1.635	1.78	0.43	0.29	0.51	0.71	0.83	0.131907	0.852546	0.41631	0.0836158	0.0862714	44.09	37.51	44.94	63.5	45.15	42.5
FALSE	High	Master Protein	Q86SX6	Glutaredoxin-related protein 5, mitochondrial OS=Homo sapiens OX=9606 GN=GLRX5 PE=1 SV=2	0.001	FALSE	5.292	9	1	2	1	1	157	16.6	6.79	4.9	1	cellular homeostasis;metabolic process;regulation of biological process	mitochondrion;nucleus;organelle lumen	catalytic activity;metal ion binding;protein binding	Pf00462	51218	ENSG00000182512.4	GLRX5	14			0	1.157	0.831	0.885	1.635	1.542	0.21	-0.27	-0.18	0.71	0.62	0.908183	0.982784	0.966571	0.68002	0.821077	48.58	29.48	64.32	108.92	123.61	90.8
FALSE	High	Master Protein	Q9H0H5	Rac GTPase-activating protein 1 OS=Homo sapiens OX=9606 GN=RACGAP1 PE=1 SV=1	0	FALSE	17.296	12	5	11	5	1	632	71	8.88	18.85	5	cell differentiation;cell division;cell organization and biogenesis;cell proliferation;cellular component movement;development;metabolic process;regulation of biological process;response to stimulus;transport	cytoplasm;cytoskeleton;cytosol;endosome;membrane;nucleus	catalytic activity;enzyme regulator activity;metal ion binding;nucleotide binding;protein binding	Pf00130, Pf00620, Pf07888	29127	ENSG00000161800.12	RACGAP1	12		Signal Transduction of S1P Receptor; Wnt Signaling Pathway and Pluripotency	0	0.808	0.428	0.834	1.634	0.704	-0.31	-1.22	-0.26	0.71	-0.51	0.616956	0.110746	0.897043	0.553866	0.611121	42.69	9.41	24.84	37.87	21.04	153
FALSE	Low	Master Protein	A0A0B4J2F0	Protein PIGBOS1 OS=Homo sapiens OX=9606 GN=PIGBOS1 PE=3 SV=1	0.059	FALSE	1.775	19	1	1	1	1	54	6.3	8.5	0	1		extracellular			101928527	ENSG00000225973.3	LOC101928527; PIGBOS1	15			0	0.937	0.622	1.096	1.631	1.028	-0.09	-0.69	0.13	0.71	0.04	0.98899	0.862341	0.999255	0.872949	0.995752	37.82	17.13	52.92	29.23	26.14	115.7
FALSE	High	None	Q86YB8	ERO1-like protein beta OS=Homo sapiens OX=9606 GN=ERO1B PE=1 SV=2	0.002	FALSE	4.862	2	1	4	1	1	467	53.5	7.99	9.55	1	cell organization and biogenesis;cellular homeostasis;metabolic process;regulation of biological process;transport	endoplasmic reticulum;membrane	catalytic activity;protein binding	Pf04137	56605	ENSG00000086619.13	ERO1LB; ERO1B	1	Protein processing in endoplasmic reticulum		0	0.957	0.657	1.115	1.629	1.061	-0.06	-0.61	0.16	0.7	0.08	0.980086	0.799821	0.99291	0.636778	0.994878	34.64	12.99	62.59	60.35	60.43	108.4
FALSE	High	Master Protein	Q8IYS1	Peptidase M20 domain-containing protein 2 OS=Homo sapiens OX=9606 GN=PM20D2 PE=1 SV=2	0	FALSE	30.513	20	5	26	5	1	436	47.7	5.85	70.99	5	metabolic process;regulation of biological process		catalytic activity	Pf01546, Pf07687	135293	ENSG00000146281.5	PM20D2	6			0	0.898	0.655	1.112	1.628	0.83	-0.15	-0.61	0.15	0.7	-0.27	0.904314	0.72205	0.987795	0.256675	0.875718	22.82	12.05	55.83	46.33	40.56	121.5
FALSE	High	Master Protein	P78536	Disintegrin and metalloproteinase domain-containing protein 17 OS=Homo sapiens OX=9606 GN=ADAM17 PE=1 SV=1	0	FALSE	23.047	7	3	7	3	1	824	93	5.76	16.58	3	cell differentiation;cellular component movement;defense response;metabolic process;regulation of biological process;response to stimulus	cell surface;cytoplasm;cytoskeleton;cytosol;membrane	catalytic activity;metal ion binding;protein binding	Pf00200, Pf01421, Pf01562, Pf13574, Pf13582, Pf13583, Pf13688	6868	ENSG00000151694.12	ADAM17	2	Alzheimer's disease; Notch signaling pathway; Epithelial cell signaling in Helicobacter pylori infection	Copper homeostasis; Notch Signaling Pathway; Notch Signaling Pathway; Alzheimers Disease; Brain-Derived Neurotrophic Factor (BDNF) signaling pathway	0	0.826	0.451	1.267	1.628	1.015	-0.28	-1.15	0.34	0.7	0.02	0.800666	0.214545	0.948387	0.622849	0.995752	9.9	20.53	26.06	64.28	12.99	100.5
FALSE	High	Master Protein	Q9H3H1	tRNA dimethylallyltransferase OS=Homo sapiens OX=9606 GN=TRIT1 PE=1 SV=1	0	FALSE	14.532	10	3	3	3	1	467	52.7	8.21	8.26	3	cell organization and biogenesis;metabolic process	cytoplasm;mitochondrion;organelle lumen	catalytic activity;metal ion binding;nucleotide binding	Pf01715, Pf01745, Pf12171, Pf13173, Pf13207, Pf13238, Pf13671	54802	ENSG00000043514.15	TRIT1	1	Metabolic pathways		0	1	0.624	0.847	1.627	1.035	0	-0.68	-0.24	0.7	0.05	0.999944	0.856474	0.965823	0.831531	0.995752	29.61	11.9	32.03	30.26	42.31	88.8
FALSE	High	Master Protein	P58546	Myotrophin OS=Homo sapiens OX=9606 GN=MTPN PE=1 SV=2	0	FALSE	17.975	49	3	7	3	1	118	12.9	5.52	23.98	3	cell differentiation;cell organization and biogenesis;metabolic process;regulation of biological process;response to stimulus	cytoplasm;cytosol;nucleus	DNA binding;protein binding	Pf00023, Pf12796, Pf13606, Pf13637, Pf13857	767558; 136319	ENSG00000105887.10	LUZP6; MTPN	7			0	0.814	0.691	1.094	1.625	1.091	-0.3	-0.53	0.13	0.7	0.13	0.700994	0.832469	0.999922	0.56411	0.989349	6.89	17.47	39.38	47.74	41.53	100.3
FALSE	High	Master Protein	Q96E29	Transcription termination factor 3, mitochondrial OS=Homo sapiens OX=9606 GN=MTERF3 PE=1 SV=2	0	FALSE	20.529	11	4	12	4	1	417	47.9	8.53	26.37	4	cell communication;cell organization and biogenesis;metabolic process;regulation of biological process;response to stimulus	membrane;mitochondrion	DNA binding;protein binding;RNA binding	Pf02536	51001	ENSG00000156469.8	MTERFD1; MTERF3	8		Mitochondrial Gene Expression	0	1.028	0.518	0.771	1.624	0.906	0.04	-0.95	-0.37	0.7	-0.14	0.97396	0.440801	0.807755	0.583517	0.947623	52.6	22.07	19.86	78.66	39.6	111.5
FALSE	High	Master Protein	P56377	AP-1 complex subunit sigma-2 OS=Homo sapiens OX=9606 GN=AP1S2 PE=1 SV=1	0.001	FALSE	5.246	11	2	2	1	1	157	18.6	5.47	4.59	2	regulation of biological process;transport	cytosol;Golgi;membrane	protein binding;transporter activity	Pf01217	8905	ENSG00000182287.13	AP1S2	X	Lysosome		0	1.312	1.32	1.59	1.624	2.087	0.39	0.4	0.67	0.7	1.06	0.703647	0.82545	0.663859	0.637333	0.336844	44.35	25.41	35.78	31.28	32.11	69.9
FALSE	High	Master Protein	Q2PZI1	Probable C-mannosyltransferase DPY19L1 OS=Homo sapiens OX=9606 GN=DPY19L1 PE=2 SV=1	0	FALSE	20.876	9	4	8	4	1	675	77.3	8.95	22.55	4	metabolic process	membrane	catalytic activity	Pf10034	23333	ENSG00000173852.14	DPY19L1	7			0	0.957	0.716	0.811	1.623	0.92	-0.06	-0.48	-0.3	0.7	-0.12	0.978394	0.82333	0.71405	0.235045	0.959608	43.2	19.41	47.28	79.53	68.66	116
FALSE	High	Master Protein	Q9NUJ3	T-complex protein 11-like protein 1 OS=Homo sapiens OX=9606 GN=TCP11L1 PE=1 SV=1	0.001	FALSE	5.581	2	1	1	1	1	509	57	5.59	2.72	1				Pf05794	55346	ENSG00000176148.15	TCP11L1	11			0	1.177	1.426	1.965	1.623	2.314	0.24	0.51	0.97	0.7	1.21	0.929248	0.795716	0.333169	0.626347	0.257812	0	11.51	103.21	95.51	103.21	67.6
FALSE	Low	Master Protein	Q9H2M3	S-methylmethionine--homocysteine S-methyltransferase BHMT2 OS=Homo sapiens OX=9606 GN=BHMT2 PE=1 SV=1	0.065	FALSE	1.704	4	1	5	1	1	363	40.3	5.87	0	1	metabolic process	cytoplasm;cytosol	catalytic activity;metal ion binding	Pf02574	23743	ENSG00000132840.9	BHMT2	5	Metabolic pathways; Cysteine and methionine metabolism	Allograft Rejection; One carbon metabolism and related pathways	0	1.229	0.563	0.853	1.621	0.913	0.3	-0.83	-0.23	0.7	-0.13	0.874654	0.777075	0.963796	0.872949	0.974738	32.55	43.07	28.84	108.34	34.74	107.2
FALSE	High	Master Protein	Q99504	Eyes absent homolog 3 OS=Homo sapiens OX=9606 GN=EYA3 PE=1 SV=3	0.002	FALSE	4.415	3	1	1	1	1	573	62.6	5.21	2.68	1	cell differentiation;cell organization and biogenesis;development;metabolic process;regulation of biological process;response to stimulus	cytoplasm;nucleus	catalytic activity;metal ion binding;protein binding		2140	ENSG00000158161.15	EYA3	1			0	1.179	0.831	1.143	1.621	1.348	0.24	-0.27	0.19	0.7	0.43	0.931016	0.995352	0.988797	0.741151	0.929578	0	0	0	0	0	91.8
FALSE	High	Master Protein	Q9Y2P4	Long-chain fatty acid transport protein 6 OS=Homo sapiens OX=9606 GN=SLC27A6 PE=2 SV=1	0	FALSE	8.117	3	2	3	2	1	619	70.1	8.51	6.76	2	metabolic process;transport	membrane	catalytic activity;nucleotide binding;transporter activity	Pf00501, Pf13193	28965	ENSG00000113396.12	SLC27A6	5	PPAR signaling pathway; Insulin resistance	PPAR signaling pathway	0	1.115	1.068	1.264	1.619	1.161	0.16	0.09	0.34	0.7	0.21	0.93876	0.980835	0.948387	0.637333	0.969017	49.77	63.89	39.31	66.88	40.75	99.3
FALSE	High	Master Protein	P49815	Tuberin OS=Homo sapiens OX=9606 GN=TSC2 PE=1 SV=2	0	FALSE	11.5	3	2	8	2	1	1807	200.5	7.31	15.39	2	cell death;regulation of biological process;response to stimulus;transport	cytoplasm;cytosol;Golgi;membrane;nucleus;vacuole	enzyme regulator activity;protein binding	Pf02145, Pf03542, Pf11864	7249	ENSG00000103197.16	TSC2	16	Insulin signaling pathway; Phospholipase D signaling pathway; Thyroid hormone signaling pathway; Choline metabolism in cancer; AMPK signaling pathway; mTOR signaling pathway; p53 signaling pathway; Longevity regulating pathway; PI3K-Akt signaling pathway	Target Of Rapamycin (TOR) Signaling; Angiopoietin Like Protein 8 Regulatory Pathway; Follicle Stimulating Hormone (FSH) signaling pathway; Insulin Signaling; Focal Adhesion-PI3K-Akt-mTOR-signaling pathway; PI3K-AKT-mTOR signaling pathway and therapeutic opportunities; Nanoparticle triggered autophagic cell death; Integrated Breast Cancer Pathway; AMP-activated Protein Kinase (AMPK) Signaling; Bra…	0	1.116	0.641	1.598	1.619	1.02	0.16	-0.64	0.68	0.7	0.03	0.932007	0.775935	0.642136	0.58229	0.993894	19.26	23.57	52.95	39.97	93.67	81.2
FALSE	High	Master Protein	Q13642	Four and a half LIM domains protein 1 OS=Homo sapiens OX=9606 GN=FHL1 PE=1 SV=4	0.001	FALSE	5.7	3	1	7	1	1	323	36.2	8.97	10.52	1	cell differentiation;development;regulation of biological process	cytoplasm;cytosol;membrane;nucleus	metal ion binding;protein binding	Pf00412	2273	ENSG00000022267.16	FHL1	X	Jak-STAT signaling pathway	Notch Signaling Pathway	0	0.985	0.564	1.011	1.619	0.913	-0.02	-0.83	0.02	0.7	-0.13	0.999944	0.772601	0.999922	0.857588	0.969017	36.56	8.82	47.79	47.79	43.73	118.3
FALSE	High	Master Protein Candidate	P20226	TATA-box-binding protein OS=Homo sapiens OX=9606 GN=TBP PE=1 SV=2	0.003	FALSE	4.18	3	1	1	1	1	339	37.7	9.79	1.82	1	cell organization and biogenesis;metabolic process;regulation of biological process	cytoplasm;nucleus	DNA binding;protein binding	Pf00352	6908	ENSG00000112592.13	TBP	6	Viral carcinogenesis; Basal transcription factors; Epstein-Barr virus infection; Huntington's disease; HTLV-I infection; Herpes simplex infection	Eukaryotic Transcription Initiation	0	0.886	0.837	1.483	1.618	1.766	-0.18	-0.26	0.57	0.69	0.82	0.931016	0.996742	0.845064	0.743844	0.741902	71.66	9.19	86.97	44.88	55.86	99.7
FALSE	High	Master Protein	Q6SJ96	TATA box-binding protein-like protein 2 OS=Homo sapiens OX=9606 GN=TBPL2 PE=2 SV=1	0.003	FALSE	4.18	3	1	1	1	1	375	41.5	6.43	1.82	1	development;metabolic process;regulation of biological process	cytoplasm;nucleus	DNA binding	Pf00352	387332	ENSG00000182521.5	TBPL2	14	Viral carcinogenesis; Basal transcription factors; Epstein-Barr virus infection; Huntington's disease; HTLV-I infection; Herpes simplex infection		0	0.886	0.837	1.483	1.618	1.766	-0.18	-0.26	0.57	0.69	0.82	0.931016	0.996742	0.845064	0.743844	0.741902	71.66	9.19	86.97	44.88	55.86	99.7
FALSE	Low	Master Protein	Q8N488	RING1 and YY1-binding protein OS=Homo sapiens OX=9606 GN=RYBP PE=1 SV=2	0.138	FALSE	1.13	10	1	1	1	1	228	24.8	9.63	0	1	cell death;cell organization and biogenesis;development;metabolic process;regulation of biological process	cytoplasm;nucleus	DNA binding;metal ion binding;protein binding	Pf00641	23429	ENSG00000281766.2	RYBP	3; CHR_HG126_PATCH			0	0.798	0.863	1.378	1.618	1.045	-0.33	-0.21	0.46	0.69	0.06	0.911765	0.999876	0.920908	0.875775	0.995752	14.54	48.73	56.94	56.64	49.8	100.1
FALSE	High	Master Protein	Q9H4E7	Differentially expressed in FDCP 6 homolog OS=Homo sapiens OX=9606 GN=DEF6 PE=1 SV=1	0	FALSE	36.326	18	8	26	8	1	631	73.9	6.05	57.15	8		cytoplasm;cytoskeleton;cytosol;membrane;nucleus	protein binding	Pf00169, Pf08458, Pf10211, Pf14593	50619	ENSG00000023892.10	DEF6	6			0	0.965	0.738	1.344	1.618	1.181	-0.05	-0.44	0.43	0.69	0.24	0.981907	0.829953	0.619971	0.152578	0.920178	32.94	25.87	58.59	70.31	66.57	123.1
FALSE	High	Master Protein	Q9UJ68	Mitochondrial peptide methionine sulfoxide reductase OS=Homo sapiens OX=9606 GN=MSRA PE=1 SV=1	0.001	FALSE	5.681	6	1	5	1	1	235	26.1	8.09	16.03	1	metabolic process;response to stimulus	cytoplasm;cytoskeleton;cytosol;membrane;mitochondrion;nucleus	catalytic activity	Pf01625	4482	ENSG00000175806.14	MSRA	8		Sulindac Metabolic Pathway	0	1.232	0.58	0.802	1.615	0.998	0.3	-0.79	-0.32	0.69	0	0.764501	0.627318	0.863572	0.637821	0.994683	18.3	15.34	7.12	43.77	20.98	107.6
FALSE	High	Master Protein	Q12834	Cell division cycle protein 20 homolog OS=Homo sapiens OX=9606 GN=CDC20 PE=1 SV=2	0.007	FALSE	3.524	3	1	1	1	1	499	54.7	9.23	1.75	1	cell differentiation;cell division;cell organization and biogenesis;metabolic process;regulation of biological process	cytoplasm;cytoskeleton;cytosol	enzyme regulator activity;protein binding	Pf00400	991	ENSG00000117399.13	CDC20	1	Viral carcinogenesis; Ubiquitin mediated proteolysis; HTLV-I infection; Oocyte meiosis; Cell cycle	Cell Cycle	0	0.773	0.828	1.635	1.615	1.368	-0.37	-0.27	0.71	0.69	0.45	0.821173	0.992173	0.662688	0.662027	0.91238	15.33	24.6	27.07	42.18	23.3	105.1
FALSE	High	Master Protein	P46019	Phosphorylase b kinase regulatory subunit alpha, liver isoform OS=Homo sapiens OX=9606 GN=PHKA2 PE=1 SV=1	0	FALSE	8.766	3	2	2	2	1	1235	138.3	6.44	4.88	2	metabolic process	cytosol;membrane	catalytic activity;protein binding	Pf00723	5256	ENSG00000044446.11	PHKA2	X	Insulin signaling pathway; Glucagon signaling pathway; Calcium signaling pathway	Type II diabetes mellitus; Glycogen Metabolism	0	1.047	1.023	1.578	1.615	1.652	0.07	0.03	0.66	0.69	0.72	0.98899	0.987862	0.787039	0.710111	0.804117	58.18	29.92	40.34	45.45	55.54	84.7
FALSE	High	Master Protein	Q9Y3Y2	Chromatin target of PRMT1 protein OS=Homo sapiens OX=9606 GN=CHTOP PE=1 SV=2	0	FALSE	18.378	17	3	15	3	1	248	26.4	12.23	26.81	3	metabolic process;regulation of biological process;transport	nucleus	DNA binding;nucleotide binding;protein binding;RNA binding	Pf13865	26097	ENSG00000160679.12	CHTOP	1			0	1.043	0.686	1.03	1.614	1.011	0.06	-0.54	0.04	0.69	0.02	0.987704	0.811218	0.999922	0.639922	0.995752	56.35	28.22	44.51	75.67	76.8	102.2
FALSE	High	Master Protein	P32856	Syntaxin-2 OS=Homo sapiens OX=9606 GN=STX2 PE=1 SV=3	0	FALSE	12.008	16	2	3	2	1	288	33.3	6.28	4.01	2	cell differentiation;cell organization and biogenesis;regulation of biological process;response to stimulus;transport	membrane	protein binding	Pf00804, Pf05739	2054	ENSG00000111450.13	STX2	12	SNARE interactions in vesicular transport; Synaptic vesicle cycle	Synaptic Vesicle Pathway	0	1.017	0.646	1.163	1.611	0.712	0.02	-0.63	0.22	0.69	-0.49	0.987145	0.928915	0.988797	0.891744	0.865188	78.53	16.85	80.24	70.92	17.94	118.5
FALSE	High	None	P30613	Pyruvate kinase PKLR OS=Homo sapiens OX=9606 GN=PKLR PE=1 SV=2	0.002	FALSE	4.857	2	1	13	1	1	574	61.8	7.74	35.42	1	metabolic process;response to stimulus	cytoplasm;cytosol	catalytic activity;metal ion binding;nucleotide binding	Pf00224, Pf02887	5313	ENSG00000143627.17; ENSG00000262785.5	PKLR	1; CHR_HSCHR1_2_CTG31	Insulin signaling pathway; Carbon metabolism; Purine metabolism; Pyruvate metabolism; Maturity onset diabetes of the young; Type II diabetes mellitus; Glycolysis / Gluconeogenesis; Biosynthesis of amino acids; Non-alcoholic fatty liver disease (NAFLD); Metabolic pathways	Glycolysis and Gluconeogenesis	0	0.89	0.69	0.962	1.61	0.843	-0.17	-0.54	-0.06	0.69	-0.25	0.634123	0.581183	0.957203	0.00164491	0.795152	7.27	13.36	29.47	35.71	8.87	117.4
FALSE	High	Master Protein	O15264	Mitogen-activated protein kinase 13 OS=Homo sapiens OX=9606 GN=MAPK13 PE=1 SV=1	0	FALSE	16.094	16	4	14	2	1	365	42.1	8.38	27.54	4	metabolic process;regulation of biological process;response to stimulus	cytoplasm;cytosol;nucleus	catalytic activity;nucleotide binding;protein binding;signal transducer activity	Pf00069, Pf01636, Pf07714, Pf14531	5603	ENSG00000156711.16	MAPK13	6	Dopaminergic synapse; Chagas disease (American trypanosomiasis); Th1 and Th2 cell differentiation; T cell receptor signaling pathway; TNF signaling pathway; NOD-like receptor signaling pathway; Osteoclast differentiation; FoxO signaling pathway; Prolactin signaling pathway; Epstein-Barr virus infection; Neurotrophin signaling pathway; VEGF signaling pathway; Leishmaniasis; Rap1 signaling pathway;…	Insulin Signaling; Toll-like receptor signaling pathway; RIG-I-like Receptor Signaling; Angiopoietin Like Protein 8 Regulatory Pathway; Retinoblastoma (RB) in Cancer; Regulation of toll-like receptor signaling pathway; MAPK Signaling Pathway; Oxidative Damage; Rac1/Pak1/p38/MMP-2 pathway; Photodynamic therapy-induced NFE2L2 (NRF2) survival signaling; Parkinsons Disease Pathway	0	1.404	1.04	1.192	1.609	1.674	0.49	0.06	0.25	0.69	0.74	0.312613	0.980861	0.98366	0.61973	0.526261	58.61	46.43	64.13	57.06	35.13	78.2
FALSE	High	Master Protein	P38571	Lysosomal acid lipase/cholesteryl ester hydrolase OS=Homo sapiens OX=9606 GN=LIPA PE=1 SV=2	0	FALSE	28.712	26	5	20	5	1	399	45.4	6.92	56.56	5	cell organization and biogenesis;cell proliferation;defense response;metabolic process;response to stimulus	organelle lumen;vacuole	catalytic activity	Pf00561, Pf04083, Pf12695, Pf12697	3988	ENSG00000107798.17	LIPA	10	Lysosome; Steroid biosynthesis	Phase I biotransformations, non P450	0	1.46	1.139	0.997	1.608	1.562	0.55	0.19	0	0.69	0.64	0.00147195	0.822636	0.990405	0.0921248	0.260832	52.41	57.11	104.67	43.25	112.96	72.1
FALSE	High	Master Protein	Q16342	Programmed cell death protein 2 OS=Homo sapiens OX=9606 GN=PDCD2 PE=1 SV=2	0.002	FALSE	5.199	3	1	3	1	1	344	38.6	5.38	10.44	1	cell death;metabolic process;regulation of biological process	cytoplasm;nucleus	DNA binding;metal ion binding;protein binding	Pf01753, Pf04194	5134	ENSG00000071994.10	PDCD2	6			0	1.222	0.846	1.033	1.607	1.158	0.29	-0.24	0.05	0.68	0.21	0.755965	0.980861	0.99903	0.625454	0.967285	55.11	12.51	56.52	27.51	31.23	95.8
FALSE	High	Master Protein	Q9UHR4	Brain-specific angiogenesis inhibitor 1-associated protein 2-like protein 1 OS=Homo sapiens OX=9606 GN=BAIAP2L1 PE=1 SV=2	0	FALSE	19.944	14	6	14	6	1	511	56.8	8.68	14.16	6	cell organization and biogenesis;regulation of biological process;response to stimulus	cytoplasm;cytoskeleton;cytosol;membrane	protein binding	Pf00018, Pf07653, Pf08397, Pf14604	55971	ENSG00000006453.13	BAIAP2L1	7			0	1.212	0.641	1.027	1.604	1.017	0.28	-0.64	0.04	0.68	0.02	0.69383	0.78218	0.995258	0.644142	0.993441	44.26	13.3	65.58	48.89	58.1	111.4
FALSE	High	Master Protein	O14545	TRAF-type zinc finger domain-containing protein 1 OS=Homo sapiens OX=9606 GN=TRAFD1 PE=1 SV=1	0	FALSE	17.297	10	3	4	3	1	582	64.8	5.29	13.83	3	regulation of biological process;response to stimulus		metal ion binding;protein binding		10906	ENSG00000135148.11	TRAFD1	12		Regulation of toll-like receptor signaling pathway	0	0.732	0.392	0.959	1.603	0.632	-0.45	-1.35	-0.06	0.68	-0.66	0.708821	0.291639	0.988797	0.903456	0.767539	29.97	11.92	56.94	82.27	28.91	139.2
FALSE	High	Master Protein	O60637	Tetraspanin-3 OS=Homo sapiens OX=9606 GN=TSPAN3 PE=2 SV=1	0.001	FALSE	5.226	9	2	2	2	1	253	28	5.81	4.79	2	regulation of biological process;response to stimulus	membrane		Pf00335, Pf02687, Pf11947	10099	ENSG00000140391.14	TSPAN3	15			0	0.927	0.848	1.465	1.602	1.358	-0.11	-0.24	0.55	0.68	0.44	0.984337	0.999876	0.881836	0.875775	0.908425	12.05	37.72	50.9	39.45	51.74	96.8
FALSE	High	Master Protein	O43353	Receptor-interacting serine/threonine-protein kinase 2 OS=Homo sapiens OX=9606 GN=RIPK2 PE=1 SV=2	0	FALSE	14.682	7	3	5	3	1	540	61.2	7.09	13.05	3	cell death;cell proliferation;defense response;metabolic process;regulation of biological process;response to stimulus	cytoplasm;cytoskeleton;cytosol	catalytic activity;nucleotide binding;protein binding;signal transducer activity	Pf00069, Pf00619, Pf07714	8767	ENSG00000104312.7	RIPK2	8	NOD-like receptor signaling pathway; Neurotrophin signaling pathway; Tuberculosis; Shigellosis	Apoptosis-related network due to altered Notch3 in ovarian cancer; T-Cell antigen Receptor (TCR) Signaling Pathway; Fas Ligand (FasL) pathway and Stress induction of Heat Shock Proteins (HSP) regulation; Nucleotide-binding Oligomerization Domain (NOD) pathway	0	1.129	1.182	1.466	1.602	1.594	0.18	0.24	0.55	0.68	0.67	0.863173	0.90912	0.754832	0.60554	0.622467	30.58	36.1	11.42	27.34	22.87	85.9
FALSE	High	Master Protein	Q14676	Mediator of DNA damage checkpoint protein 1 OS=Homo sapiens OX=9606 GN=MDC1 PE=1 SV=3	0.003	FALSE	4.157	1	1	2	1	1	2089	226.5	5.47	0	1	metabolic process;regulation of biological process;response to stimulus	chromosome;nucleus	protein binding	Pf00498, Pf05109, Pf05539	9656	ENSG00000228575.9; ENSG00000137337.14; ENSG00000225589.9; ENSG00000224587.9; ENSG00000234012.9; ENSG00000237095.9	MDC1	6; CHR_HSCHR6_MHC_MANN_CTG1; CHR_HSCHR6_MHC_DBB_CTG1; CHR_HSCHR6_MHC_COX_CTG1; CHR_HSCHR6_MHC_APD_CTG1; CHR_HSCHR6_MHC_MCF_CTG1		ATM Signaling Network in Development and Disease	0	1.004	0.579	0.827	1.601	0.825	0.01	-0.79	-0.27	0.68	-0.28	0.98899	0.830588	0.94153	0.903456	0.937856	28.01	15.61	13.74	36.18	18.81	119.6
FALSE	High	Master Protein	Q9BYN0	Sulfiredoxin-1 OS=Homo sapiens OX=9606 GN=SRXN1 PE=1 SV=2	0	FALSE	8.372	14	2	4	2	1	137	14.3	8.19	9.8	2	metabolic process;response to stimulus	cytoplasm;cytosol	antioxidant activity;catalytic activity;nucleotide binding;protein binding	Pf02195	140809	ENSG00000271303.1	SRXN1	20		Photodynamic therapy-induced NFE2L2 (NRF2) survival signaling	0	0.762	0.405	0.893	1.6	0.719	-0.39	-1.3	-0.16	0.68	-0.48	0.538211	0.103961	0.964377	0.668312	0.664786	16.73	6.19	51.32	45.82	27.02	127.5
FALSE	High	Master Protein	Q9UPQ8	Dolichol kinase OS=Homo sapiens OX=9606 GN=DOLK PE=1 SV=1	0.001	FALSE	5.665	5	1	2	1	1	538	59.2	8.6	2.04	1	metabolic process	endoplasmic reticulum;membrane	catalytic activity;protein binding		22845	ENSG00000175283.7	DOLK	9	N-Glycan biosynthesis; Metabolic pathways		0	0.698	0.625	1.432	1.599	0.999	-0.52	-0.68	0.52	0.68	0	0.793705	0.892842	0.886062	0.885412	0.995752	17	16.36	14.36	15.54	34.03	120.4
FALSE	Low	Master Protein	Q8IVL5	Prolyl 3-hydroxylase 2 OS=Homo sapiens OX=9606 GN=P3H2 PE=1 SV=1	0.091	FALSE	1.445	1	1	4	1	1	708	80.9	5.71	0	1	metabolic process;regulation of biological process	endoplasmic reticulum;Golgi;organelle lumen	catalytic activity;metal ion binding;protein binding	Pf13640, Pf14853	55214	ENSG00000090530.9	LEPREL1; P3H2	3			0	0.895	0.788	1.569	1.598	0.991	-0.16	-0.34	0.65	0.68	-0.01	0.942	0.961568	0.764514	0.690032	0.982492	34.86	21.49	68.66	59.39	43.55	106.1
FALSE	High	Master Protein	Q8IU85	Calcium/calmodulin-dependent protein kinase type 1D OS=Homo sapiens OX=9606 GN=CAMK1D PE=1 SV=1	0	FALSE	26.875	26	6	11	6	1	385	42.9	7.21	25.04	6	defense response;metabolic process;regulation of biological process;response to stimulus	cytoplasm;nucleus	catalytic activity;nucleotide binding;protein binding	Pf00069, Pf07714, Pf14531	57118	ENSG00000183049.12	CAMK1D	10	Oxytocin signaling pathway; Aldosterone synthesis and secretion		0	1.333	1.501	1.753	1.595	2.19	0.41	0.59	0.81	0.67	1.13	0.569548	0.618469	0.481144	0.617532	0.122622	73.07	69.91	85.73	52.66	46.83	95.2
FALSE	High	Master Protein	O75054	Immunoglobulin superfamily member 3 OS=Homo sapiens OX=9606 GN=IGSF3 PE=2 SV=3	0	FALSE	13.746	5	4	4	4	1	1194	135.1	6.07	6.16	4	regulation of biological process;response to stimulus	cell surface;membrane		Pf07679	3321	ENSG00000143061.17	IGSF3	1			0	1.267	0.813	0.772	1.594	1.17	0.34	-0.3	-0.37	0.67	0.23	0.789037	0.980861	0.839173	0.699637	0.976599	55.94	31.5	9.45	20.41	54.6	61.8
FALSE	High	Master Protein	Q8NBM4	Ubiquitin-associated domain-containing protein 2 OS=Homo sapiens OX=9606 GN=UBAC2 PE=1 SV=1	0	FALSE	12.617	8	2	7	2	1	344	38.9	9.01	18.14	2		endoplasmic reticulum;membrane	catalytic activity;protein binding	Pf00627	337867	ENSG00000134882.15	UBAC2	13			0	2.065	1.083	0.814	1.594	1.833	1.05	0.12	-0.3	0.67	0.87	2.86596e-06	0.961568	0.668945	0.13651	0.0934959	88.45	112.71	33.12	67.23	84.39	37.7
FALSE	High	Master Protein	P12074	Cytochrome c oxidase subunit 6A1, mitochondrial OS=Homo sapiens OX=9606 GN=COX6A1 PE=1 SV=4	0.009	FALSE	3.312	27	1	6	1	1	109	12.1	9.32	8.97	1	metabolic process;regulation of biological process;transport	membrane;mitochondrion	catalytic activity;enzyme regulator activity;transporter activity	Pf02046	1337	ENSG00000111775.2	COX6A1	12	Huntington's disease; Parkinson's disease; Alzheimer's disease; Oxidative phosphorylation; Non-alcoholic fatty liver disease (NAFLD); Metabolic pathways; Cardiac muscle contraction	Electron Transport Chain	0	0.877	0.62	0.946	1.593	0.83	-0.19	-0.69	-0.08	0.67	-0.27	0.874646	0.680988	0.985659	0.481399	0.882144	49.3	30.96	54.61	97.42	48.18	131.6
FALSE	Medium	None	O43150	Arf-GAP with SH3 domain, ANK repeat and PH domain-containing protein 2 OS=Homo sapiens OX=9606 GN=ASAP2 PE=1 SV=3	0.03	FALSE	2.269	1	1	3	1	1	1006	111.6	6.68	1.75	1	regulation of biological process	cytoplasm;Golgi;membrane	enzyme regulator activity;metal ion binding;protein binding	Pf00018, Pf00023, Pf00169, Pf01412, Pf07653, Pf12796, Pf13637, Pf13857, Pf14604	8853	ENSG00000151693.9	ASAP2	2	Endocytosis; Fc gamma R-mediated phagocytosis		0	0.791	0.676	1.452	1.593	1.182	-0.34	-0.56	0.54	0.67	0.24	0.88684	0.933633	0.870895	0.875775	0.965371	17.16	13.91	38.86	44.77	15	118.9
FALSE	High	Master Protein	P78330	Phosphoserine phosphatase OS=Homo sapiens OX=9606 GN=PSPH PE=1 SV=2	0	FALSE	28.186	39	5	20	5	1	225	25	5.69	60.25	5	metabolic process;response to stimulus	cytoplasm;cytosol	catalytic activity;metal ion binding;protein binding	Pf00702, Pf05822, Pf11019, Pf12710, Pf13419	5723	ENSG00000146733.13	PSPH	7	Carbon metabolism; Glycine, serine and threonine metabolism; Biosynthesis of amino acids; Metabolic pathways	Trans-sulfuration and one carbon metabolism	0	1.026	0.478	0.662	1.592	0.667	0.04	-1.06	-0.59	0.67	-0.58	0.929413	0.0707534	0.0836666	0.126576	0.313348	33.11	12.26	22.55	57.13	17.95	104.6
FALSE	High	Master Protein	Q9UJX6	Anaphase-promoting complex subunit 2 OS=Homo sapiens OX=9606 GN=ANAPC2 PE=1 SV=1	0	FALSE	28.167	10	6	20	6	1	822	93.8	5.22	38.76	6	cell differentiation;cell division;metabolic process;regulation of biological process	cytosol;nucleus	catalytic activity;protein binding	Pf00888, Pf08672	29882	ENSG00000176248.8	ANAPC2	9	Ubiquitin mediated proteolysis; Progesterone-mediated oocyte maturation; HTLV-I infection; Oocyte meiosis; Cell cycle		0	0.862	0.708	1.232	1.592	1.034	-0.21	-0.5	0.3	0.67	0.05	0.854696	0.848766	0.911133	0.352427	0.995752	23.63	22.2	37.82	52.84	37.98	110.9
FALSE	High	Master Protein	P60763	Ras-related C3 botulinum toxin substrate 3 OS=Homo sapiens OX=9606 GN=RAC3 PE=1 SV=1	0	FALSE	26.062	36	7	62	2	1	192	21.4	8.15	111.15	7	cell communication;cell organization and biogenesis;regulation of biological process;response to stimulus	cytoplasm;cytoskeleton;cytosol;membrane	catalytic activity;nucleotide binding;protein binding	Pf00025, Pf00071, Pf08477	5881	ENSG00000169750.8	RAC3	17	Pancreatic cancer; B cell receptor signaling pathway; VEGF signaling pathway; Rap1 signaling pathway; MAPK signaling pathway; Colorectal cancer; Natural killer cell mediated cytotoxicity; Pathways in cancer; Wnt signaling pathway; Focal adhesion; Choline metabolism in cancer; Adherens junction; Regulation of actin cytoskeleton; Sphingolipid signaling pathway; Fc epsilon RI signaling pathway; Vira…	Regulation of Actin Cytoskeleton; RalA downstream regulated genes; Integrin-mediated Cell Adhesion; Microglia Pathogen Phagocytosis Pathway; Focal Adhesion	0	0.924	0.64	1.126	1.589	1.058	-0.11	-0.64	0.17	0.67	0.08	0.950595	0.750477	0.988797	0.537738	0.993441	12.25	4.71	36.69	34.01	38.61	103.9
FALSE	High	Master Protein	O43741	5'-AMP-activated protein kinase subunit beta-2 OS=Homo sapiens OX=9606 GN=PRKAB2 PE=1 SV=1	0	FALSE	8.444	10	2	3	2	1	272	30.3	6.46	4.02	2	cell communication;metabolic process;regulation of biological process;response to stimulus;transport	cytosol	catalytic activity;protein binding	Pf02922, Pf04739	5565	ENSG00000131791.7	LOC101060511; PRKAB2	1	Longevity regulating pathway - multiple species; Insulin signaling pathway; FoxO signaling pathway; Oxytocin signaling pathway; Glucagon signaling pathway; AMPK signaling pathway; Non-alcoholic fatty liver disease (NAFLD); Circadian rhythm; Insulin resistance; Adipocytokine signaling pathway; Longevity regulating pathway; Hypertrophic cardiomyopathy (HCM)	Sterol Regulatory Element-Binding Proteins (SREBP) signalling; Angiopoietin Like Protein 8 Regulatory Pathway; AMP-activated Protein Kinase (AMPK) Signaling; Target Of Rapamycin (TOR) Signaling; Energy Metabolism	0	0.786	0.72	1.408	1.589	1.144	-0.35	-0.47	0.49	0.67	0.19	0.821667	0.941119	0.886062	0.726839	0.985666	11.53	13.53	55.84	48.26	61.44	108.8
FALSE	High	Master Protein	P0CG30	Glutathione S-transferase theta-2B OS=Homo sapiens OX=9606 GN=GSTT2B PE=1 SV=1	0	FALSE	42.911	34	6	36	6	1	244	27.5	6.4	57.73	6	metabolic process	cytoplasm;cytosol	catalytic activity;protein binding	Pf00043, Pf02798, Pf13409, Pf13410, Pf13417	2953; 653689	ENSG00000278695.1; ENSG00000133433.10	GSTT2; GSTT2B	22; CHR_HSCHR22_1_CTG7	Glutathione metabolism; Metabolism of xenobiotics by cytochrome P450; Drug metabolism - cytochrome P450; Chemical carcinogenesis; Platinum drug resistance	Metapathway biotransformation; Glutathione metabolism; Oxidative Stress	0	1.066	0.924	1.356	1.588	1.447	0.09	-0.11	0.44	0.67	0.53	0.844125	0.999876	0.565566	0.129132	0.407165	61.02	49.28	44.04	49.29	55.21	111.3
FALSE	High	None	Q9P2K3	REST corepressor 3 OS=Homo sapiens OX=9606 GN=RCOR3 PE=1 SV=2	0	FALSE	10.954	7	3	7	3	1	495	55.5	8.27	15.8	3	metabolic process;regulation of biological process	nucleus	DNA binding;protein binding	Pf00249, Pf01448	55758	ENSG00000117625.13	RCOR3	1			0	0.981	0.678	0.972	1.586	0.904	-0.03	-0.56	-0.04	0.67	-0.15	0.999912	0.82195	0.988797	0.467699	0.953713	27.87	14.61	24.53	48.78	28.95	116.8
FALSE	High	Master Protein	P25208	Nuclear transcription factor Y subunit beta OS=Homo sapiens OX=9606 GN=NFYB PE=1 SV=2	0	FALSE	7.103	10	1	2	1	1	207	22.8	4.59	5.83	1	metabolic process;regulation of biological process	nucleus	DNA binding;protein binding	Pf00125, Pf00808	4801	ENSG00000120837.7	NFYB	12	Tuberculosis; HTLV-I infection; Antigen processing and presentation		0	1.401	0.764	0.864	1.585	1.21	0.49	-0.39	-0.21	0.66	0.28	0.700308	0.972965	0.969595	0.842158	0.965371	13.7	38.43	0	72.28	13.7	91.4
FALSE	High	Master Protein	O75954	Tetraspanin-9 OS=Homo sapiens OX=9606 GN=TSPAN9 PE=1 SV=1	0	FALSE	9.251	11	2	2	2	1	239	26.8	7.68	6.38	2	regulation of biological process;response to stimulus	membrane		Pf00335	10867	ENSG00000011105.12	TSPAN9	12			0	0.771	0.991	2.275	1.582	1.319	-0.37	-0.01	1.19	0.66	0.4	0.45023	0.995352	0.0461061	0.645115	0.885262	26.11	23.19	11.11	0	1.02	128.6
FALSE	High	Master Protein	Q9BZL1	Ubiquitin-like protein 5 OS=Homo sapiens OX=9606 GN=UBL5 PE=1 SV=1	0.002	FALSE	5.046	29	2	3	2	1	73	8.5	8.44	5.45	2	metabolic process	cytoplasm;nucleus	protein binding	Pf00240	59286	ENSG00000198258.10	UBL5	19			0	0.745	0.489	1.097	1.582	0.772	-0.42	-1.03	0.13	0.66	-0.37	0.803388	0.593647	0.99903	0.865063	0.902877	21.87	10.42	45.81	29.47	24.28	131.7
FALSE	High	Master Protein	Q7L266	Isoaspartyl peptidase/L-asparaginase OS=Homo sapiens OX=9606 GN=ASRGL1 PE=1 SV=2	0	FALSE	25.84	26	4	15	4	1	308	32	6.24	40.83	4	metabolic process	cytoplasm;cytosol;nucleus	catalytic activity	Pf01112	80150	ENSG00000162174.12	ASRGL1	11			0	1.174	0.883	0.972	1.581	1.5	0.23	-0.18	-0.04	0.66	0.59	0.606108	0.999876	0.988797	0.163733	0.429127	27.12	49.68	53.84	79.27	60.6	97.2
FALSE	High	Master Protein	P02545	Prelamin-A/C OS=Homo sapiens OX=9606 GN=LMNA PE=1 SV=1	0	FALSE	288.607	63	39	378	38	1	664	74.1	7.02	1057.03	39	cell organization and biogenesis;regulation of biological process;response to stimulus;transport	cytosol;membrane;nucleus	protein binding;structural molecule activity	Pf00038, Pf00932	4000	ENSG00000160789.19	LMNA	1	Arrhythmogenic right ventricular cardiomyopathy (ARVC); Dilated cardiomyopathy; Apoptosis; Hypertrophic cardiomyopathy (HCM)	Fas Ligand (FasL) pathway and Stress induction of Heat Shock Proteins (HSP) regulation; Arrhythmogenic Right Ventricular Cardiomyopathy; Adipogenesis	1	0.895	0.507	0.81	1.581	0.818	-0.16	-0.98	-0.3	0.66	-0.29	0.695451	0.00879763	0.316843	0.00337716	0.685888	41.4	11.16	41.33	56.19	37.1	135.5
FALSE	High	Master Protein	Q9Y5R4	HemK methyltransferase family member 1 OS=Homo sapiens OX=9606 GN=HEMK1 PE=1 SV=1	0	FALSE	9.051	8	1	3	1	1	338	38.2	6.7	4.49	1	metabolic process;regulation of biological process	mitochondrion	catalytic activity;DNA binding;protein binding	Pf01170, Pf03602, Pf05175, Pf06325, Pf09445, Pf12847, Pf13649, Pf13659, Pf13847	51409	ENSG00000114735.9	HEMK1	3			0	0.742	1.184	2.721	1.579	3.639	-0.43	0.24	1.44	0.66	1.86	0.789604	0.941119	0.0279291	0.680649	0.010778	50.94	106.17	0	0	0	44.9
FALSE	High	None	O14602	Eukaryotic translation initiation factor 1A, Y-chromosomal OS=Homo sapiens OX=9606 GN=EIF1AY PE=1 SV=4	0	FALSE	38.088	49	6	24	6	1	144	16.4	5.24	57.65	6	metabolic process		protein binding;RNA binding	Pf01176	9086	ENSG00000198692.9	EIF1AY	Y	RNA transport	Translation Factors	0	1.327	0.857	0.873	1.578	1.281	0.41	-0.22	-0.2	0.66	0.36	0.0195831	0.999876	0.831123	0.13651	0.744918	44.92	31.25	52.89	81.2	63.88	93.8
FALSE	High	Master Protein	P47813	Eukaryotic translation initiation factor 1A, X-chromosomal OS=Homo sapiens OX=9606 GN=EIF1AX PE=1 SV=2	0	FALSE	42.127	56	7	26	7	1	144	16.5	5.24	62.36	7	metabolic process	cytosol	protein binding;RNA binding	Pf01176	1964; 107984923	ENSG00000173674.10	EIF1AX; LOC101060318; LOC107984923	X; 1	RNA transport	Translation Factors	0	1.327	0.857	0.873	1.578	1.281	0.41	-0.22	-0.2	0.66	0.36	0.022742	0.999876	0.833466	0.12483	0.726137	44.92	26.49	58.89	81.2	65.71	90.5
FALSE	Low	None	Q9HCS2	Cytochrome P450 4F12 OS=Homo sapiens OX=9606 GN=CYP4F12 PE=1 SV=3	0.133	FALSE	1.152	2	1	2	1	1	524	60.3	7.55	0	1											0	1.193	0.897	1.15	1.573	1.303	0.25	-0.16	0.2	0.65	0.38	0.902551	0.999876	0.988797	0.863622	0.929578	74.94	59.36	74.98	65.24	71.11	94.2
FALSE	Low	None	Q08477	Docosahexaenoic acid omega-hydroxylase CYP4F3 OS=Homo sapiens OX=9606 GN=CYP4F3 PE=1 SV=2	0.133	FALSE	1.152	2	1	2	1	1	520	59.8	7.64	0	1	metabolic process	endoplasmic reticulum;membrane	catalytic activity;metal ion binding	Pf00067	4051	ENSG00000186529.15	CYP4F3	19	Arachidonic acid metabolism; Metabolic pathways	Metapathway biotransformation; Oxidation by Cytochrome P450	0	1.193	0.897	1.15	1.573	1.303	0.25	-0.16	0.2	0.65	0.38	0.902551	0.999876	0.988797	0.863622	0.929578	74.94	59.36	74.98	65.24	71.11	94.2
FALSE	Low	None	P78329	Phylloquinone omega-hydroxylase CYP4F2 OS=Homo sapiens OX=9606 GN=CYP4F2 PE=1 SV=1	0.133	FALSE	1.152	2	1	2	1	1	520	59.8	7.08	0	1	coagulation;metabolic process;regulation of biological process	cytoplasm;endoplasmic reticulum;membrane	catalytic activity;metal ion binding;protein binding	Pf00067	8529	ENSG00000186115.12	CYP4F2	19	Arachidonic acid metabolism; Metabolic pathways	Metapathway biotransformation; Oxidation by Cytochrome P450	0	1.193	0.897	1.15	1.573	1.303	0.25	-0.16	0.2	0.65	0.38	0.902551	0.999876	0.988797	0.863622	0.929578	74.94	59.36	74.98	65.24	71.11	94.2
FALSE	Low	None	P98187	Cytochrome P450 4F8 OS=Homo sapiens OX=9606 GN=CYP4F8 PE=1 SV=1	0.133	FALSE	1.152	2	1	2	1	1	520	60	8.43	0	1	metabolic process	endoplasmic reticulum;membrane	catalytic activity;metal ion binding	Pf00067	11283	ENSG00000186526.12	CYP4F8	19	Arachidonic acid metabolism; Metabolic pathways	Metapathway biotransformation; Oxidation by Cytochrome P450	0	1.193	0.897	1.15	1.573	1.303	0.25	-0.16	0.2	0.65	0.38	0.902551	0.999876	0.988797	0.863622	0.929578	74.94	59.36	74.98	65.24	71.11	94.2
FALSE	High	Master Protein	Q9UH99	SUN domain-containing protein 2 OS=Homo sapiens OX=9606 GN=SUN2 PE=1 SV=3	0	FALSE	81.252	32	12	46	12	1	717	80.3	6.73	139.03	12	cell organization and biogenesis;cellular component movement;regulation of biological process;transport	chromosome;endosome;membrane;nucleus	protein binding	Pf07738	25777	ENSG00000100242.15	SUN2	22			0	0.914	0.492	0.653	1.573	0.574	-0.13	-1.02	-0.62	0.65	-0.8	0.924064	0.0883645	0.0644583	0.168932	0.0546637	46.16	19.84	26.95	93.15	21.68	167.4
FALSE	Low	Master Protein	Q8IY37	Probable ATP-dependent RNA helicase DHX37 OS=Homo sapiens OX=9606 GN=DHX37 PE=1 SV=1	0.158	FALSE	1.062	1	1	3	1	1	1157	129.5	8.1	0	1	metabolic process	cytoplasm	catalytic activity;nucleotide binding;RNA binding	Pf00270, Pf00271, Pf04408, Pf07717, Pf13401	57647	ENSG00000150990.7	DHX37	12			0	1.841	1.125	0.983	1.573	1.77	0.88	0.17	-0.02	0.65	0.82	0.202992	0.953647	0.995258	0.86499	0.669384	44.52	24.45	47.1	29.18	41.07	69.7
FALSE	High	Master Protein	Q9BQB6	Vitamin K epoxide reductase complex subunit 1 OS=Homo sapiens OX=9606 GN=VKORC1 PE=1 SV=1	0	FALSE	6.816	8	1	8	1	1	163	18.2	9.36	24.38	1	coagulation;metabolic process	endoplasmic reticulum;membrane	catalytic activity	Pf07884	79001	ENSG00000167397.14	VKORC1	16	Ubiquinone and other terpenoid-quinone biosynthesis		0	0.867	0.706	1.123	1.573	1.07	-0.21	-0.5	0.17	0.65	0.1	0.852286	0.856474	0.988797	0.483993	0.985678	13.86	31.59	51.69	66.58	60.29	107
FALSE	High	Master Protein	Q9UHQ1	Nuclear prelamin A recognition factor OS=Homo sapiens OX=9606 GN=NARF PE=1 SV=1	0	FALSE	11.911	9	3	5	2	1	456	51.1	7.08	10.89	3	metabolic process	nucleus;organelle lumen	catalytic activity;protein binding	Pf02256, Pf02906	26502	ENSG00000141562.17	NARF	17			1	1.438	0.786	0.876	1.572	1.121	0.52	-0.35	-0.19	0.65	0.16	0.217531	0.941119	0.948387	0.690903	0.977425	35.07	28.15	21.13	29.76	34.2	116.5
FALSE	High	Master Protein	Q969G6	Riboflavin kinase OS=Homo sapiens OX=9606 GN=RFK PE=1 SV=2	0	FALSE	17.325	21	3	9	3	1	155	17.6	8.13	26.04	3	cell death;metabolic process;regulation of biological process	cytoplasm;cytosol;mitochondrion	catalytic activity;metal ion binding;nucleotide binding;protein binding	Pf01687	55312	ENSG00000135002.11	RFK	9	Riboflavin metabolism; Metabolic pathways	TNF alpha Signaling Pathway; Selenium Micronutrient Network; Folate Metabolism	0	0.714	0.641	1.235	1.572	1.124	-0.49	-0.64	0.3	0.65	0.17	0.483805	0.708215	0.972559	0.667535	0.985533	45.71	25.34	112.5	102.06	101.97	103.2
FALSE	High	Master Protein	Q96AT1	Uncharacterized protein KIAA1143 OS=Homo sapiens OX=9606 GN=KIAA1143 PE=1 SV=2	0.001	FALSE	6.162	18	2	3	2	1	154	17.5	6.11	6.61	2			protein binding	Pf15377	57456	ENSG00000281665.1; ENSG00000163807.5	KIAA1143	3; CHR_HG2066_PATCH			0	0.977	0.74	1.231	1.571	1.072	-0.03	-0.43	0.3	0.65	0.1	0.992092	0.952472	0.979704	0.74903	0.999969	50.92	15.08	50.25	45.02	54.05	88.3
FALSE	Medium	None	Q9BXS1	Isopentenyl-diphosphate delta-isomerase 2 OS=Homo sapiens OX=9606 GN=IDI2 PE=1 SV=1	0.01	FALSE	3.103	7	2	13	1	1	227	26.7	6.46	15.37	2	metabolic process	cytosol	catalytic activity;metal ion binding	Pf00293	91734	ENSG00000148377.5	IDI2	10	Terpenoid backbone biosynthesis; Metabolic pathways		0	0.867	0.532	1.109	1.57	1.241	-0.21	-0.91	0.15	0.65	0.31	0.876913	0.38241	0.995258	0.71046	0.937856	60.29	14.68	52.73	130.93	50.94	124.3
FALSE	High	Master Protein	Q8N4C8	Misshapen-like kinase 1 OS=Homo sapiens OX=9606 GN=MINK1 PE=1 SV=2	0	FALSE	24.492	6	6	34	1	1	1332	149.7	7.85	76.59	6	cell communication;cell organization and biogenesis;development;metabolic process;regulation of biological process;response to stimulus	cytoplasm;cytosol;Golgi;membrane	catalytic activity;nucleotide binding;protein binding;signal transducer activity	Pf00069, Pf00780, Pf07714, Pf14531	50488	ENSG00000141503.15	MINK1	17		Insulin Signaling; Angiopoietin Like Protein 8 Regulatory Pathway; MAPK Signaling Pathway	0	0.768	0.674	1.536	1.569	0.991	-0.38	-0.57	0.62	0.65	-0.01	0.789037	0.912505	0.829104	0.858444	0.985678	17.07	13.25	41.48	29.18	20.74	116.5
FALSE	High	Master Protein	Q9NZD2	Glycolipid transfer protein OS=Homo sapiens OX=9606 GN=GLTP PE=1 SV=3	0	FALSE	11.853	20	2	5	2	1	209	23.8	7.39	12.23	2	metabolic process;transport	cytoplasm;cytosol;membrane	protein binding;transporter activity	Pf08718	51228	ENSG00000139433.9	GLTP	12			0	1.193	1.213	1.183	1.569	1.903	0.25	0.28	0.24	0.65	0.93	0.885701	0.903541	0.985712	0.569428	0.307665	33.62	33.78	96.32	43.75	44.32	78.6
FALSE	High	Master Protein	O95219	Sorting nexin-4 OS=Homo sapiens OX=9606 GN=SNX4 PE=1 SV=1	0	FALSE	33.559	18	6	23	6	1	450	51.9	5.99	61.03	6	cell organization and biogenesis;transport	cytoplasm;endosome;membrane	protein binding	Pf00787	8723	ENSG00000114520.10	SNX4	3	Endocytosis		0	1.032	0.895	1.136	1.568	1.065	0.05	-0.16	0.18	0.65	0.09	0.955399	0.999876	0.98366	0.200207	0.982274	26.98	27.97	45.75	69.14	46.78	84.6
FALSE	High	Master Protein	Q6UWE0	E3 ubiquitin-protein ligase LRSAM1 OS=Homo sapiens OX=9606 GN=LRSAM1 PE=1 SV=1	0	FALSE	40.746	13	7	12	7	1	723	83.5	5.94	33.46	7	cell organization and biogenesis;metabolic process;regulation of biological process;response to stimulus;transport	cytoplasm;cytosol;membrane	catalytic activity;metal ion binding;protein binding;transporter activity	Pf00536, Pf07647, Pf12799, Pf13855, Pf13920	90678	ENSG00000148356.13	LRSAM1	9			0	0.986	0.676	0.988	1.567	1.042	-0.02	-0.57	-0.02	0.65	0.06	0.999944	0.759042	0.990405	0.369232	0.993441	50.15	19.26	47.46	57.54	48.78	117.3
FALSE	High	Master Protein	Q9BXB5	Oxysterol-binding protein-related protein 10 OS=Homo sapiens OX=9606 GN=OSBPL10 PE=1 SV=2	0	FALSE	8.249	4	3	5	2	1	764	83.9	8.31	8.76	3	metabolic process;transport	cytoplasm;cytoskeleton;cytosol	transporter activity	Pf00169, Pf01237, Pf15409	114884	ENSG00000144645.13	OSBPL10	3			0	1.151	0.676	0.919	1.565	1.057	0.2	-0.57	-0.12	0.65	0.08	0.904314	0.856474	0.986677	0.745599	0.996034	36.99	20.66	36.34	40.54	50.17	103
FALSE	High	Master Protein	Q15013	MAD2L1-binding protein OS=Homo sapiens OX=9606 GN=MAD2L1BP PE=1 SV=1	0.001	FALSE	5.702	11	1	1	1	1	274	31	6.3	3.32	1	regulation of biological process	cytoplasm;cytoskeleton;membrane;nucleus	protein binding	Pf06581	9587	ENSG00000124688.13	MAD2L1BP	6			0	1.523	1.33	1.366	1.564	2.08	0.61	0.41	0.45	0.65	1.06	0.513949	0.849116	0.90289	0.741611	0.472199	52.22	32.85	0	19.96	52.22	67.4
FALSE	High	Master Protein	Q14493	Histone RNA hairpin-binding protein OS=Homo sapiens OX=9606 GN=SLBP PE=1 SV=1	0	FALSE	7.561	10	2	4	2	1	270	31.3	7.47	7.35	2	metabolic process;transport	cytoplasm;cytosol;nucleus	protein binding;RNA binding	Pf15247	7884	ENSG00000163950.12	SLBP	4			0	1.1	1.195	1.409	1.564	1.87	0.14	0.26	0.49	0.65	0.9	0.937732	0.911346	0.835469	0.671046	0.527224	55.24	57.96	77.31	104.48	104.48	73.7
FALSE	High	Master Protein	Q8WYQ3	Coiled-coil-helix-coiled-coil-helix domain-containing protein 10, mitochondrial OS=Homo sapiens OX=9606 GN=CHCHD10 PE=1 SV=1	0	FALSE	8.782	16	1	4	1	1	142	14.1	7.84	9.87	1	cell organization and biogenesis;metabolic process;regulation of biological process	mitochondrion;nucleus		Pf06747	400916	ENSG00000273607.3; ENSG00000250479.8	CHCHD10	22; CHR_HSCHR22_1_CTG7			0	0.925	0.43	0.757	1.564	0.668	-0.11	-1.22	-0.4	0.65	-0.58	0.964913	0.409935	0.865251	0.801727	0.767539	26.88	4.77	11.91	18.48	11.66	130.2
FALSE	High	Master Protein	Q15021	Condensin complex subunit 1 OS=Homo sapiens OX=9606 GN=NCAPD2 PE=1 SV=3	0	FALSE	187.723	33	32	115	32	1	1401	157.1	6.61	332.64	32	cell division;cell organization and biogenesis;metabolic process	chromosome;cytoplasm;cytosol;membrane;nucleus	protein binding	Pf12717, Pf12922	9918	ENSG00000010292.12	NCAPD2	12			0	0.989	0.635	0.908	1.564	0.927	-0.02	-0.65	-0.14	0.65	-0.11	0.960998	0.481017	0.886062	0.0513754	0.969017	35.01	21.63	43.77	62.28	41.72	122.7
FALSE	High	Master Protein	Q9H2G2	STE20-like serine/threonine-protein kinase OS=Homo sapiens OX=9606 GN=SLK PE=1 SV=1	0	FALSE	76.841	22	18	61	17	1	1235	142.6	5.15	119.73	18	cell death;cell organization and biogenesis;metabolic process;regulation of biological process;response to stimulus	cytoplasm	catalytic activity;nucleotide binding;protein binding	Pf00069, Pf07714, Pf12474, Pf14531	9748	ENSG00000065613.13	SLK	10	Oocyte meiosis		1	0.988	0.422	0.737	1.564	0.705	-0.02	-1.24	-0.44	0.64	-0.5	0.969791	0.0146522	0.295072	0.178828	0.424069	38.23	6.09	31.1	72.54	32.4	158.2
FALSE	High	Master Protein	Q7Z6M1	Rab9 effector protein with kelch motifs OS=Homo sapiens OX=9606 GN=RABEPK PE=1 SV=1	0	FALSE	21.641	24	6	12	6	1	372	40.5	6.25	26.08	6	transport	cytoplasm;cytosol;endosome;membrane	protein binding	Pf01344, Pf07646, Pf13415, Pf13418, Pf13854, Pf13964	10244	ENSG00000136933.16	RABEPK	9			0	0.882	0.533	0.825	1.562	0.739	-0.18	-0.91	-0.28	0.64	-0.44	0.894836	0.477317	0.875111	0.68977	0.734171	29.25	15.45	31.99	37.88	23.37	162.8
FALSE	High	Master Protein	Q9UKU7	Isobutyryl-CoA dehydrogenase, mitochondrial OS=Homo sapiens OX=9606 GN=ACAD8 PE=1 SV=1	0	FALSE	19.316	9	2	13	2	1	415	45	7.85	40.79	2	metabolic process;regulation of biological process	mitochondrion;organelle lumen	catalytic activity;nucleotide binding	Pf00441, Pf02770, Pf02771, Pf08028	27034	ENSG00000151498.11	ACAD8	11	Metabolic pathways; Valine, leucine and isoleucine degradation		0	1.074	1.054	1.287	1.562	1.483	0.1	0.08	0.36	0.64	0.57	0.929373	0.978801	0.807755	0.329854	0.548737	51.16	29.42	53.01	39.03	40.97	91.6
FALSE	Low	Master Protein	Q86YL5	Testis development-related protein OS=Homo sapiens OX=9606 GN=TDRP PE=1 SV=2	0.101	FALSE	1.369	6	1	6	1	1	185	20.4	6.01	0	1		cytoplasm;cytosol;nucleus			157695	ENSG00000180190.11	C8orf42; TDRP	8			0	0.968	0.826	1.336	1.561	1.294	-0.05	-0.28	0.42	0.64	0.37	0.989941	0.98299	0.94153	0.768587	0.944123	32.95	19.38	76.51	90.1	49.05	101.5
FALSE	High	None	Q9HBM6	Transcription initiation factor TFIID subunit 9B OS=Homo sapiens OX=9606 GN=TAF9B PE=1 SV=1	0	FALSE	9.091	8	2	15	2	1	251	27.6	9.55	29.36	2	cell organization and biogenesis;metabolic process;regulation of biological process	nucleus	catalytic activity;DNA binding;protein binding	Pf02291	51616	ENSG00000187325.4	TAF9B	X	Basal transcription factors; Herpes simplex infection		0	1.027	0.747	1.014	1.561	1.134	0.04	-0.42	0.02	0.64	0.18	0.955399	0.864282	0.999922	0.191869	0.926774	48.59	44.92	45.55	61.46	36.21	118.2
FALSE	High	Master Protein	Q96HR9	Receptor expression-enhancing protein 6 OS=Homo sapiens OX=9606 GN=REEP6 PE=1 SV=2	0	FALSE	17.457	19	4	11	4	1	211	23.4	8.56	28.01	4	regulation of biological process;response to stimulus	endoplasmic reticulum;membrane;nucleus	protein binding	Pf03134	92840		REEP6	19			0	1.005	0.953	1.519	1.559	1.704	0.01	-0.07	0.6	0.64	0.77	0.98899	0.999876	0.429829	0.513885	0.474973	50.01	47.79	77.67	46.5	64.94	17.7
FALSE	Low	Master Protein	Q9BZ23	Pantothenate kinase 2, mitochondrial OS=Homo sapiens OX=9606 GN=PANK2 PE=1 SV=3	0.085	FALSE	1.511	3	1	1	1	1	570	62.6	9.28	0	1	cell organization and biogenesis;metabolic process;regulation of biological process	cytoplasm;cytosol;mitochondrion	catalytic activity;nucleotide binding	Pf03630	80025	ENSG00000125779.21	PANK2	20	Pantothenate and CoA biosynthesis; Metabolic pathways		0	1.474	1.134	1.212	1.557	1.775	0.56	0.18	0.28	0.64	0.83	0.0191791	0.932096	0.911133	0.188835	0.14949	72.5	100.79	99.08	117.33	122.27	70.2
FALSE	High	Master Protein	Q9UQN3	Charged multivesicular body protein 2b OS=Homo sapiens OX=9606 GN=CHMP2B PE=1 SV=1	0.001	FALSE	5.842	9	2	6	2	1	213	23.9	8.76	3.48	2	cell communication;cell organization and biogenesis;cellular homeostasis;metabolic process;regulation of biological process;response to stimulus;transport	cytoplasm;cytosol;endosome;membrane;vacuole	protein binding	Pf03357	25978	ENSG00000083937.8	CHMP2B	3	Endocytosis		0	1.167	0.539	0.709	1.557	0.741	0.22	-0.89	-0.5	0.64	-0.43	0.931016	0.733621	0.827947	0.872949	0.876247	20.46	7.42	38.03	75.66	36.19	110.8
FALSE	High	None	Q00526	Cyclin-dependent kinase 3 OS=Homo sapiens OX=9606 GN=CDK3 PE=1 SV=1	0	FALSE	17.711	15	4	21	2	1	305	35	8.79	50.8	4	cell division;cell proliferation;development;metabolic process;regulation of biological process;response to stimulus	cytoplasm;nucleus	catalytic activity;nucleotide binding;protein binding	Pf00069, Pf07714, Pf14531	1018	ENSG00000250506.7	CDK3	17			0	0.993	0.907	0.742	1.556	0.805	-0.01	-0.14	-0.43	0.64	-0.31	0.981907	0.999876	0.38129	0.169946	0.825294	37.87	52.35	14.24	90.97	31.06	111.6
FALSE	High	Master Protein	Q86TB9	Protein PAT1 homolog 1 OS=Homo sapiens OX=9606 GN=PATL1 PE=1 SV=2	0.005	FALSE	3.858	2	2	5	2	1	770	86.8	6.67	7.04	2	cell organization and biogenesis;metabolic process	cytoplasm;cytosol;nucleus	protein binding;RNA binding	Pf09770	219988	ENSG00000166889.13	PATL1	11	RNA degradation		0	0.868	0.625	1.189	1.555	1.008	-0.2	-0.68	0.25	0.64	0.01	0.924064	0.845086	0.988797	0.872949	0.993894	26.36	16.47	41.44	50.28	37.37	123.9
FALSE	Medium	Master Protein	Q9NRM1	Enamelin OS=Homo sapiens OX=9606 GN=ENAM PE=1 SV=3	0.044	FALSE	2.015	1	1	6	1	1	1142	128.7	6.83	0	1	cell differentiation;metabolic process;regulation of biological process	extracellular;organelle lumen	protein binding;structural molecule activity	Pf15362	10117	ENSG00000132464.11	ENAM	4			0	0.53	0.918	2.075	1.555	1.864	-0.92	-0.12	1.05	0.64	0.9	0.215497	0.999876	0.406958	0.872949	0.616265	8.74	70.44	37.72	100.11	60.79	119.9
FALSE	High	Master Protein	Q7Z417	Nuclear fragile X mental retardation-interacting protein 2 OS=Homo sapiens OX=9606 GN=NUFIP2 PE=1 SV=1	0	FALSE	34.968	18	7	30	7	1	695	76.1	8.7	60.37	7		cytoplasm;cytosol;membrane;nucleus;ribosome	protein binding;RNA binding	Pf15293	57532	ENSG00000108256.8	NUFIP2	17			0	0.928	0.448	0.738	1.554	0.655	-0.11	-1.16	-0.44	0.64	-0.61	0.940803	0.1623	0.489067	0.525933	0.410469	31.12	9.44	31.69	42.95	17.06	131.4
FALSE	Medium	Master Protein	Q9NWX6	Probable tRNA(His) guanylyltransferase OS=Homo sapiens OX=9606 GN=THG1L PE=1 SV=2	0.013	FALSE	2.971	4	1	2	1	1	298	34.8	8	0	1	cell organization and biogenesis;metabolic process	cytoplasm;cytosol;mitochondrion	catalytic activity;metal ion binding;nucleotide binding;protein binding;RNA binding	Pf04446, Pf14413	54974	ENSG00000113272.13	THG1L	5			0	1.029	0.839	1.267	1.553	1.304	0.04	-0.25	0.34	0.63	0.38	0.987145	0.998631	0.967711	0.872949	0.93056	24.58	19.89	47.4	46.06	48.25	95.9
FALSE	Medium	None	Q96A58	Ras-related and estrogen-regulated growth inhibitor OS=Homo sapiens OX=9606 GN=RERG PE=1 SV=1	0.025	FALSE	2.397	4	1	5	1	1	199	22.6	7.37	0	1	regulation of biological process;response to stimulus	cytoplasm;cytosol;membrane;nucleus	catalytic activity;nucleotide binding;protein binding	Pf00025, Pf00071, Pf08477	85004	ENSG00000134533.6	RERG	12			0	1.276	0.662	0.826	1.553	1.054	0.35	-0.6	-0.28	0.63	0.08	0.793705	0.879049	0.949377	0.800524	0.995752	53.9	9.36	32.01	25.62	27.31	104
FALSE	High	Master Protein	Q8IY95	Transmembrane protein 192 OS=Homo sapiens OX=9606 GN=TMEM192 PE=1 SV=1	0	FALSE	10.169	10	2	13	2	1	271	30.9	7.99	31.69	2		endoplasmic reticulum;endosome;Golgi;membrane;nucleus;vacuole	protein binding	Pf14802	201931	ENSG00000170088.13	TMEM192	4			0	0.995	0.668	1.043	1.553	1.037	-0.01	-0.58	0.06	0.63	0.05	0.999944	0.838919	0.999922	0.758988	0.995752	22.07	9.86	41.76	37.58	46.78	108.1
FALSE	High	None	A6NDY0	Embryonic polyadenylate-binding protein 2 OS=Homo sapiens OX=9606 GN=PABPN1L PE=2 SV=1	0.009	FALSE	3.227	3	1	5	1	1	278	30.4	4.88	6.88	1		cytoplasm	RNA binding	Pf00076, Pf13893, Pf14259	390748	ENSG00000205022.9	PABPN1L	16	mRNA surveillance pathway; Influenza A		0	0.956	0.628	1.125	1.553	1.075	-0.07	-0.67	0.17	0.63	0.1	0.988405	0.852546	0.994465	0.888364	0.993441	37.69	20.99	17.36	51.5	40.13	107.1
FALSE	Medium	Master Protein	Q15751	Probable E3 ubiquitin-protein ligase HERC1 OS=Homo sapiens OX=9606 GN=HERC1 PE=1 SV=2	0.01	FALSE	3.149	0	1	1	1	1	4861	531.9	6.04	0	1	cell differentiation;cell organization and biogenesis;metabolic process;regulation of biological process;transport	cytoplasm;cytosol;Golgi;membrane	catalytic activity;protein binding	Pf00400, Pf00415, Pf00622, Pf00632, Pf13540	8925	ENSG00000103657.13	HERC1	15	Ubiquitin mediated proteolysis		0	0.343	0.331	1.496	1.553	0.513	-1.54	-1.6	0.58	0.63	-0.96	1.25444e-05	0.0115854	0.853079	0.796444	0.316358	28.3	25.78	87.78	89.2	81.53	182.9
FALSE	High	None	Q9Y2H9	Microtubule-associated serine/threonine-protein kinase 1 OS=Homo sapiens OX=9606 GN=MAST1 PE=1 SV=2	0.007	FALSE	3.508	1	1	4	0	4	1570	170.6	8.44	7.77	1	cell organization and biogenesis;metabolic process;regulation of biological process;response to stimulus	cytoplasm;cytoskeleton;membrane	catalytic activity;metal ion binding;nucleotide binding;protein binding	Pf00069, Pf00595, Pf07714, Pf08926, Pf13180, Pf14531	22983	ENSG00000105613.9	MAST1	19			0	3.692	1.659	1.144	1.549	2.577	1.88	0.73	0.19	0.63	1.37	1.6644e-05	0.621907	0.988797	0.801811	0.24174	9.21	86.52	63.13	104.29	104.42	44.8
FALSE	High	None	Q96GX5	Serine/threonine-protein kinase greatwall OS=Homo sapiens OX=9606 GN=MASTL PE=1 SV=1	0.007	FALSE	3.508	1	1	4	0	4	879	97.3	5.99	7.77	1	cell division;cell organization and biogenesis;metabolic process;regulation of biological process;response to stimulus	cytoplasm;cytoskeleton;nucleus	catalytic activity;nucleotide binding;protein binding	Pf00069, Pf01636, Pf07714	84930	ENSG00000120539.14	MASTL	10			0	3.692	1.659	1.144	1.549	2.577	1.88	0.73	0.19	0.63	1.37	1.6644e-05	0.621907	0.988797	0.801811	0.24174	9.21	86.52	63.13	104.29	104.42	44.8
FALSE	High	None	O15021	Microtubule-associated serine/threonine-protein kinase 4 OS=Homo sapiens OX=9606 GN=MAST4 PE=1 SV=4	0.007	FALSE	3.508	0	1	4	0	4	2623	283.9	8.62	7.77	1											0	3.692	1.659	1.144	1.549	2.577	1.88	0.73	0.19	0.63	1.37	1.6644e-05	0.621907	0.988797	0.801811	0.24174	9.21	86.52	63.13	104.29	104.42	44.8
FALSE	High	None	O60307	Microtubule-associated serine/threonine-protein kinase 3 OS=Homo sapiens OX=9606 GN=MAST3 PE=1 SV=2	0.007	FALSE	3.508	1	1	4	0	4	1309	143	8.06	7.77	1	cell organization and biogenesis;metabolic process;regulation of biological process;response to stimulus		catalytic activity;metal ion binding;nucleotide binding;protein binding	Pf00069, Pf00595, Pf07714, Pf08926, Pf13180, Pf14531	23031	ENSG00000099308.10	MAST3	19			0	3.692	1.659	1.144	1.549	2.577	1.88	0.73	0.19	0.63	1.37	1.6644e-05	0.621907	0.988797	0.801811	0.24174	9.21	86.52	63.13	104.29	104.42	44.8
FALSE	High	None	Q9UKI8	Serine/threonine-protein kinase tousled-like 1 OS=Homo sapiens OX=9606 GN=TLK1 PE=1 SV=2	0.007	FALSE	3.508	1	1	4	0	4	766	86.6	8.72	7.77	1	cell organization and biogenesis;metabolic process;regulation of biological process;response to stimulus;transport	nucleus	catalytic activity;nucleotide binding;protein binding	Pf00069, Pf07714	9874	ENSG00000198586.13	TLK1	2		miRNA Regulation of DNA Damage Response; Pathways Affected in Adenoid Cystic Carcinoma; DNA Damage Response	0	3.692	1.659	1.144	1.549	2.577	1.88	0.73	0.19	0.63	1.37	1.6644e-05	0.621907	0.988797	0.801811	0.24174	9.21	86.52	63.13	104.29	104.42	44.8
FALSE	High	Master Protein	Q9NX14	NADH dehydrogenase [ubiquinone] 1 beta subcomplex subunit 11, mitochondrial OS=Homo sapiens OX=9606 GN=NDUFB11 PE=1 SV=1	0.001	FALSE	5.404	7	1	8	1	1	153	17.3	5.22	11.41	1	cell organization and biogenesis;metabolic process;transport	membrane;mitochondrion	protein binding	Pf10183	54539	ENSG00000147123.10	NDUFB11	X	Huntington's disease; Parkinson's disease; Alzheimer's disease; Oxidative phosphorylation; Non-alcoholic fatty liver disease (NAFLD); Metabolic pathways		0	1.08	0.825	1.182	1.547	1.276	0.11	-0.28	0.24	0.63	0.35	0.962355	0.996742	0.988797	0.881046	0.936222	27.6	19.89	75.83	61.13	64.07	95.7
FALSE	Medium	Master Protein	Q96C34	RUN domain-containing protein 1 OS=Homo sapiens OX=9606 GN=RUNDC1 PE=1 SV=3	0.025	FALSE	2.421	2	1	1	1	1	613	67.6	6.19	1.98	1	cell organization and biogenesis;regulation of biological process;transport	cytoskeleton	enzyme regulator activity;protein binding	Pf02759, Pf06160, Pf13514	146923	ENSG00000198863.7	RUNDC1	17			0	1.411	0.908	1.334	1.547	1.32	0.5	-0.14	0.42	0.63	0.4	0.69383	0.999876	0.94153	0.864695	0.929511	51.62	22.43	52.32	81.09	80.86	86.1
FALSE	High	Master Protein	Q14149	MORC family CW-type zinc finger protein 3 OS=Homo sapiens OX=9606 GN=MORC3 PE=1 SV=3	0	FALSE	32.306	14	7	19	7	1	939	107	5.6	28.03	7	metabolic process;regulation of biological process	nucleus	metal ion binding;RNA binding	Pf02518, Pf04111, Pf05622, Pf07496, Pf11932, Pf13589	23515	ENSG00000159256.12	MORC3	21		Interactome of polycomb repressive complex 2 (PRC2)	0	0.803	0.627	1.142	1.545	1.08	-0.32	-0.67	0.19	0.63	0.11	0.711616	0.764604	0.988797	0.696935	0.993441	30.7	8.98	46.03	70.62	72.12	129.2
FALSE	Low	Master Protein	Q8N8I0	Sterile alpha motif domain-containing protein 12 OS=Homo sapiens OX=9606 GN=SAMD12 PE=2 SV=2	0.059	FALSE	1.78	7	1	2	1	1	201	22.9	9.33	0	1		nucleus	DNA binding;protein binding	Pf00536, Pf02198, Pf07647	401474	ENSG00000177570.13	SAMD12	8			0	100	100	1.884	1.545	100	6.64	6.64	0.91	0.63	6.64	4.12715e-16	3.81902e-16	0.516479	0.904759	3.35161e-16			4.18	26.14
FALSE	High	Master Protein	Q96EL2	28S ribosomal protein S24, mitochondrial OS=Homo sapiens OX=9606 GN=MRPS24 PE=1 SV=1	0	FALSE	27.648	38	4	13	4	1	167	19	9.38	44.94	4	cell organization and biogenesis;metabolic process	membrane;mitochondrion;ribosome	RNA binding;structural molecule activity	Pf14955	64951	ENSG00000062582.13	MRPS24	7			0	0.904	0.661	0.963	1.545	0.958	-0.14	-0.6	-0.05	0.63	-0.06	0.902341	0.674209	0.985712	0.278371	0.976521	39.96	38.33	28.57	34.02	35.84	106.3
FALSE	High	Master Protein	Q8TBA6	Golgin subfamily A member 5 OS=Homo sapiens OX=9606 GN=GOLGA5 PE=1 SV=3	0	FALSE	38.597	20	10	16	10	1	731	83	5.83	24.6	10	cell organization and biogenesis;metabolic process;regulation of biological process;transport	Golgi;membrane	catalytic activity;motor activity;protein binding;structural molecule activity;transporter activity	Pf00038, Pf01496, Pf01576, Pf02463, Pf03961, Pf04111, Pf04156, Pf04912, Pf05557, Pf05701, Pf07888, Pf08317, Pf09726, Pf09787, Pf10174, Pf11559, Pf12128, Pf13166, Pf13514, Pf13654	9950	ENSG00000066455.12	GOLGA5	14			0	0.871	0.885	1.479	1.545	1.138	-0.2	-0.18	0.56	0.63	0.19	0.874167	0.996742	0.530413	0.352427	0.948902	43.95	50.91	50.56	71.47	51.21	99.4
FALSE	High	Master Protein	Q8WWN8	Arf-GAP with Rho-GAP domain, ANK repeat and PH domain-containing protein 3 OS=Homo sapiens OX=9606 GN=ARAP3 PE=1 SV=1	0	FALSE	7.245	2	2	4	2	1	1544	169.7	7.08	7.04	2	cell differentiation;cell division;cell organization and biogenesis;cellular component movement;metabolic process;regulation of biological process;response to stimulus;transport	cytoplasm;cytoskeleton;cytosol;endosome;membrane	catalytic activity;enzyme regulator activity;metal ion binding;nucleotide binding;protein binding	Pf00169, Pf00536, Pf00620, Pf00788, Pf01412, Pf07647, Pf15406, Pf15409	64411	ENSG00000120318.15	ARAP3	5	Endocytosis; Rap1 signaling pathway; cAMP signaling pathway		0	1.188	0.7	0.917	1.545	1.057	0.25	-0.51	-0.12	0.63	0.08	0.907938	0.941119	0.988797	0.855351	0.999969	31.23	35.18	28.85	99.44	30.34	94.4
FALSE	High	Master Protein	O15162	Phospholipid scramblase 1 OS=Homo sapiens OX=9606 GN=PLSCR1 PE=1 SV=1	0	FALSE	7.272	6	2	12	2	1	318	35	4.94	22.54	2	cell death;cell organization and biogenesis;defense response;metabolic process;regulation of biological process;response to stimulus	cytosol;Golgi;membrane;nucleus	DNA binding;metal ion binding;protein binding;transporter activity	Pf03803	5359	ENSG00000188313.12	PLSCR1	3		EGF/EGFR Signaling Pathway	0	0.984	0.897	1.16	1.544	1.749	-0.02	-0.16	0.21	0.63	0.81	0.999944	0.999876	0.988797	0.86499	0.702404	66.52	27.42	74.43	34.11	51.43	99.4
FALSE	High	Master Protein	P03928	ATP synthase protein 8 OS=Homo sapiens OX=9606 GN=MT-ATP8 PE=1 SV=1	0	FALSE	6.605	13	1	11	1	1	68	8	9.91	10.36	1	cell organization and biogenesis;metabolic process;response to stimulus;transport	membrane;mitochondrion	catalytic activity;transporter activity		4509	ENSG00000228253.1	ATP8	MT	Huntington's disease; Parkinson's disease; Alzheimer's disease; Oxidative phosphorylation; Metabolic pathways	Electron Transport Chain	0	0.685	0.684	1.541	1.544	1.056	-0.55	-0.55	0.62	0.63	0.08	0.48767	0.806353	0.725763	0.71046	0.995752	21.94	19.32	41.83	50.84	21.44	106.1
FALSE	High	Master Protein	O94808	Glutamine--fructose-6-phosphate aminotransferase [isomerizing] 2 OS=Homo sapiens OX=9606 GN=GFPT2 PE=1 SV=3	0	FALSE	72.781	18	10	64	4	1	682	76.9	7.37	207.89	10	metabolic process	cytosol	catalytic activity;protein binding	Pf00310, Pf01380, Pf13230, Pf13522, Pf13537, Pf13580	9945	ENSG00000131459.12	GFPT2	5	Alanine, aspartate and glutamate metabolism; Amino sugar and nucleotide sugar metabolism; Metabolic pathways; Insulin resistance		0	1.154	0.801	1.102	1.543	1.263	0.21	-0.32	0.14	0.63	0.34	0.771457	0.954313	0.988797	0.414425	0.865762	60.17	33.2	61.87	60.34	49.09	98.5
FALSE	High	Master Protein	Q9H1E3	Nuclear ubiquitous casein and cyclin-dependent kinase substrate 1 OS=Homo sapiens OX=9606 GN=NUCKS1 PE=1 SV=1	0	FALSE	36.718	23	6	41	6	1	243	27.3	5.08	68.39	6	cell organization and biogenesis;cellular homeostasis;metabolic process;regulation of biological process;response to stimulus	chromosome;cytoplasm;nucleus	DNA binding;protein binding;RNA binding		64710	ENSG00000069275.12	NUCKS1	1			0	1.223	0.926	1.125	1.543	1.617	0.29	-0.11	0.17	0.63	0.69	0.312544	0.999876	0.979704	0.203666	0.207661	64.98	40.29	80.01	82.53	82.52	113.3
FALSE	High	Master Protein	Q92526	T-complex protein 1 subunit zeta-2 OS=Homo sapiens OX=9606 GN=CCT6B PE=1 SV=5	0	FALSE	37.043	11	6	87	1	1	530	57.8	7.24	218.16	6	cell organization and biogenesis;metabolic process;transport	cytoplasm;cytosol;membrane	nucleotide binding;protein binding;transporter activity	Pf00118, Pf05504	10693	ENSG00000132141.13	CCT6B	17			0	1.001	0.666	1.025	1.542	1.026	0	-0.59	0.04	0.62	0.04	0.99857	0.889563	0.999922	0.808224	0.993441	35.03	14.98	54.16	61.16	42.97	126.9
FALSE	High	Master Protein	Q16643	Drebrin OS=Homo sapiens OX=9606 GN=DBN1 PE=1 SV=4	0	FALSE	75.547	29	13	71	13	1	649	71.4	4.45	214.58	13	cell communication;cell differentiation;cell organization and biogenesis;cell proliferation;development;regulation of biological process	cytoplasm;cytoskeleton;membrane	protein binding	Pf00241	1627	ENSG00000113758.13	DBN1	5			0	0.885	0.524	0.878	1.541	0.768	-0.18	-0.93	-0.19	0.62	-0.38	0.766201	0.0893758	0.774841	0.0895305	0.550144	31.44	13.66	27.96	51.48	27.08	141.7
FALSE	High	Master Protein	Q00765	Receptor expression-enhancing protein 5 OS=Homo sapiens OX=9606 GN=REEP5 PE=1 SV=3	0	FALSE	19.721	16	4	36	4	1	189	21.5	8.1	60.72	4		endoplasmic reticulum;membrane	protein binding	Pf03134	7905	ENSG00000129625.12	REEP5	5			0	0.983	0.722	1.077	1.54	1.11	-0.03	-0.47	0.11	0.62	0.15	0.981907	0.826025	0.994465	0.100001	0.929578	58.46	25.45	82.76	72.04	100.74	111.8
FALSE	High	Master Protein	O75794	Cell division cycle protein 123 homolog OS=Homo sapiens OX=9606 GN=CDC123 PE=1 SV=1	0	FALSE	43.679	33	9	29	9	1	336	39.1	4.81	88.51	9	cell division;regulation of biological process	cytoplasm		Pf07065	8872	ENSG00000151465.13	CDC123	10			0	0.93	0.55	0.788	1.538	0.807	-0.1	-0.86	-0.34	0.62	-0.31	0.95141	0.280597	0.459037	0.105406	0.741902	39.63	14.25	35.98	58.4	33.46	105.9
FALSE	High	Master Protein	Q53GG5	PDZ and LIM domain protein 3 OS=Homo sapiens OX=9606 GN=PDLIM3 PE=1 SV=1	0	FALSE	7.102	4	1	2	1	1	364	39.2	6.89	7.68	1	cell organization and biogenesis	cytoplasm;cytoskeleton;cytosol	metal ion binding;protein binding;structural molecule activity	Pf00412, Pf00595, Pf13180	27295	ENSG00000154553.13	PDLIM3	4			0	1.039	0.723	0.879	1.538	1.373	0.05	-0.47	-0.19	0.62	0.46	0.960998	0.856825	0.941875	0.706011	0.85124	80.33	24.29	69.36	38.32	54.5	115.1
FALSE	Medium	None	P12883	Myosin-7 OS=Homo sapiens OX=9606 GN=MYH7 PE=1 SV=5	0.018	FALSE	2.682	0	1	1	0	4	1935	223	5.8	2.07	1	cell organization and biogenesis;cellular component movement;metabolic process;regulation of biological process;response to stimulus	cytoplasm;cytoskeleton;nucleus	catalytic activity;DNA binding;motor activity;nucleotide binding;protein binding;structural molecule activity	Pf00038, Pf00063, Pf01576, Pf02736, Pf04111, Pf04156, Pf05483, Pf05557, Pf06160, Pf07888, Pf09726, Pf12128, Pf13166, Pf13514, Pf13851	4625	ENSG00000092054.12	MYH7	14	Tight junction; Dilated cardiomyopathy; cGMP-PKG signaling pathway; Adrenergic signaling in cardiomyocytes; Viral myocarditis; Cardiac muscle contraction; Hypertrophic cardiomyopathy (HCM)		0	0.559	0.78	1.526	1.537	1.02	-0.84	-0.36	0.61	0.62	0.03	0.00907968	0.961568	0.694004	0.703733	0.993441	19.9	30.16	57.93	60.07	47.79	103.9
FALSE	Medium	None	P12882	Myosin-1 OS=Homo sapiens OX=9606 GN=MYH1 PE=1 SV=3	0.018	FALSE	2.682	0	1	1	0	4	1939	223	5.74	2.07	1	metabolic process;regulation of biological process	cytoplasm	catalytic activity;motor activity;nucleotide binding;protein binding;structural molecule activity	Pf00038, Pf00063, Pf01576, Pf02463, Pf02736, Pf04111, Pf05557, Pf05622, Pf07888, Pf08317, Pf09726, Pf10174, Pf12128, Pf13514	4619	ENSG00000109061.9	MYH1	17	Tight junction		0	0.559	0.78	1.526	1.537	1.02	-0.84	-0.36	0.61	0.62	0.03	0.00907968	0.961568	0.694004	0.703733	0.993441	19.9	30.16	57.93	60.07	47.79	103.9
FALSE	Medium	None	Q9UKX3	Myosin-13 OS=Homo sapiens OX=9606 GN=MYH13 PE=2 SV=2	0.018	FALSE	2.682	0	1	1	0	4	1938	223.5	5.68	2.07	1	metabolic process;regulation of biological process	cytoplasm	catalytic activity;motor activity;nucleotide binding;protein binding	Pf00063, Pf01576, Pf02463, Pf02736, Pf04111, Pf04156, Pf05557, Pf05622, Pf05701, Pf07888, Pf08317, Pf09726, Pf10174, Pf12128, Pf13514	8735	ENSG00000006788.13	MYH13	17	Tight junction		0	0.559	0.78	1.526	1.537	1.02	-0.84	-0.36	0.61	0.62	0.03	0.00907968	0.961568	0.694004	0.703733	0.993441	19.9	30.16	57.93	60.07	47.79	103.9
FALSE	Medium	None	P11055	Myosin-3 OS=Homo sapiens OX=9606 GN=MYH3 PE=1 SV=3	0.018	FALSE	2.682	0	1	1	0	4	1940	223.8	5.81	2.07	1	cell organization and biogenesis;cellular component movement;metabolic process;regulation of biological process;transport	cytoplasm;cytoskeleton;cytosol;Golgi	catalytic activity;motor activity;nucleotide binding;protein binding;structural molecule activity;transporter activity	Pf00038, Pf00063, Pf00261, Pf01496, Pf01576, Pf02463, Pf02736, Pf04111, Pf04156, Pf05557, Pf05622, Pf05667, Pf05701, Pf06160, Pf06637, Pf07888, Pf09726, Pf09730, Pf10174, Pf12128, Pf12718, Pf13514, Pf13851, Pf15070, Pf15254	4621	ENSG00000109063.14	MYH3	17	Tight junction	Striated Muscle Contraction	0	0.559	0.78	1.526	1.537	1.02	-0.84	-0.36	0.61	0.62	0.03	0.00907968	0.961568	0.694004	0.703733	0.993441	19.9	30.16	57.93	60.07	47.79	103.9
FALSE	Medium	None	P13533	Myosin-6 OS=Homo sapiens OX=9606 GN=MYH6 PE=1 SV=5	0.018	FALSE	2.682	0	1	1	0	4	1939	223.6	5.73	2.07	1	cell organization and biogenesis;cellular component movement;metabolic process;regulation of biological process	cytoplasm;cytosol	catalytic activity;motor activity;nucleotide binding;protein binding;structural molecule activity	Pf00038, Pf00063, Pf01576, Pf02736, Pf04111, Pf07888, Pf09726, Pf10186, Pf12128, Pf12718, Pf13514	4624	ENSG00000197616.11	MYH6	14	Tight junction; Dilated cardiomyopathy; Thyroid hormone signaling pathway; Adrenergic signaling in cardiomyocytes; Viral myocarditis; Cardiac muscle contraction; Hypertrophic cardiomyopathy (HCM)	Striated Muscle Contraction; Cardiac Progenitor Differentiation	0	0.559	0.78	1.526	1.537	1.02	-0.84	-0.36	0.61	0.62	0.03	0.00907968	0.961568	0.694004	0.703733	0.993441	19.9	30.16	57.93	60.07	47.79	103.9
FALSE	Medium	None	Q9Y623	Myosin-4 OS=Homo sapiens OX=9606 GN=MYH4 PE=2 SV=2	0.018	FALSE	2.682	0	1	1	0	4	1939	222.9	5.85	2.07	1	cellular component movement;metabolic process;response to stimulus	cytoplasm	catalytic activity;motor activity;nucleotide binding;protein binding;RNA binding	Pf00063, Pf01576, Pf02736, Pf04111, Pf05622, Pf07888, Pf08317, Pf12128	4622	ENSG00000264424.1	MYH4	17	Tight junction		0	0.559	0.78	1.526	1.537	1.02	-0.84	-0.36	0.61	0.62	0.03	0.00907968	0.961568	0.694004	0.703733	0.993441	19.9	30.16	57.93	60.07	47.79	103.9
FALSE	Medium	None	P13535	Myosin-8 OS=Homo sapiens OX=9606 GN=MYH8 PE=1 SV=3	0.018	FALSE	2.682	0	1	1	0	4	1937	222.6	5.74	2.07	1	cell organization and biogenesis;cellular component movement;metabolic process;regulation of biological process	cytoplasm;cytoskeleton;cytosol	catalytic activity;motor activity;nucleotide binding;protein binding;structural molecule activity	Pf00063, Pf01576, Pf02463, Pf02736, Pf04111, Pf04156, Pf05557, Pf05622, Pf05667, Pf05701, Pf06160, Pf07888, Pf08317, Pf09726, Pf10174, Pf11932, Pf12128, Pf12718, Pf13094, Pf13514	4626	ENSG00000133020.4	MYH8	17	Tight junction	Striated Muscle Contraction	0	0.559	0.78	1.526	1.537	1.02	-0.84	-0.36	0.61	0.62	0.03	0.00907968	0.961568	0.694004	0.703733	0.993441	19.9	30.16	57.93	60.07	47.79	103.9
FALSE	Medium	None	Q9UKX2	Myosin-2 OS=Homo sapiens OX=9606 GN=MYH2 PE=1 SV=1	0.018	FALSE	2.682	0	1	1	0	4	1941	222.9	5.82	2.07	1	cell organization and biogenesis;cellular component movement;metabolic process;regulation of biological process;response to stimulus	cytoplasm;cytosol;Golgi	catalytic activity;motor activity;nucleotide binding;protein binding;structural molecule activity	Pf00038, Pf00063, Pf01576, Pf02463, Pf02736, Pf04111, Pf05622, Pf07888, Pf08317, Pf09726, Pf10174, Pf12128, Pf13514	4620	ENSG00000125414.18	MYH2	17	Tight junction		0	0.559	0.78	1.526	1.537	1.02	-0.84	-0.36	0.61	0.62	0.03	0.00907968	0.961568	0.694004	0.703733	0.993441	19.9	30.16	57.93	60.07	47.79	103.9
FALSE	High	Master Protein	Q9Y291	28S ribosomal protein S33, mitochondrial OS=Homo sapiens OX=9606 GN=MRPS33 PE=1 SV=1	0.01	FALSE	3.203	8	1	3	1	1	106	12.6	10.11	6.4	1	cell organization and biogenesis;metabolic process	membrane;mitochondrion;ribosome	structural molecule activity	Pf08293	51650	ENSG00000090263.15	MRPS33	7			0	0.937	0.84	1.105	1.537	1.233	-0.09	-0.25	0.14	0.62	0.3	0.955399	0.972854	0.988797	0.354363	0.886679	71.03	10.38	62.84	40.12	35.06	104.1
FALSE	High	Master Protein	Q13671	Ras and Rab interactor 1 OS=Homo sapiens OX=9606 GN=RIN1 PE=1 SV=4	0	FALSE	31.755	11	6	16	6	1	783	84	8.02	42.91	6	regulation of biological process;response to stimulus;transport	cytoplasm;cytoskeleton;cytosol;membrane	enzyme regulator activity;protein binding	Pf00788, Pf02204, Pf04632	9610	ENSG00000174791.10	RIN1	11	Ras signaling pathway	EGF/EGFR Signaling Pathway	0	0.984	0.891	1.366	1.536	1.212	-0.02	-0.17	0.45	0.62	0.28	0.999944	0.999876	0.674857	0.247085	0.908425	49.65	34.19	53.98	41.8	53.84	51.2
FALSE	High	Master Protein	P49427	Ubiquitin-conjugating enzyme E2 R1 OS=Homo sapiens OX=9606 GN=CDC34 PE=1 SV=2	0.002	FALSE	4.428	6	2	12	2	1	236	26.7	4.54	5.31	2	cell division;metabolic process;regulation of biological process;response to stimulus	cytoplasm;cytosol;nucleus	catalytic activity;nucleotide binding;protein binding	Pf00179, Pf14461	997	ENSG00000099804.8	CDC34	19	Ubiquitin mediated proteolysis; Herpes simplex infection		0	1.152	0.937	0.991	1.536	1.29	0.2	-0.09	-0.01	0.62	0.37	0.888747	0.999876	0.994465	0.720417	0.924587	24.13	25.3	31.1	36.94	24.13	86
FALSE	High	Master Protein	P40763	Signal transducer and activator of transcription 3 OS=Homo sapiens OX=9606 GN=STAT3 PE=1 SV=2	0	FALSE	162.369	48	25	150	25	1	770	88	6.3	456.58	25	cell differentiation;cell organization and biogenesis;cell proliferation;cellular component movement;defense response;metabolic process;regulation of biological process;reproduction;response to stimulus;transport	cytoplasm;cytosol;membrane;mitochondrion;nucleus	DNA binding;protein binding;signal transducer activity	Pf00017, Pf01017, Pf02864, Pf02865	6774	ENSG00000168610.14	STAT3	17	Viral carcinogenesis; Inflammatory bowel disease (IBD); Hepatitis B; HIF-1 signaling pathway; Pancreatic cancer; FoxO signaling pathway; Prolactin signaling pathway; MicroRNAs in cancer; Epstein-Barr virus infection; Acute myeloid leukemia; Pathways in cancer; AGE-RAGE signaling pathway in diabetic complications; EGFR tyrosine kinase inhibitor resistance; Toxoplasmosis; Jak-STAT signaling pathway…	IL-9 Signaling Pathway; Interferon type I signaling pathways; ESC Pluripotency Pathways; TGF-beta Receptor Signaling; TCA Cycle Nutrient Utilization and Invasiveness of Ovarian Cancer; Development of pulmonary dendritic cells and macrophage subsets; IL-4 Signaling Pathway; Oncostatin M Signaling Pathway; Rac1/Pak1/p38/MMP-2 pathway; Signaling of Hepatocyte Growth Factor Receptor; AGE/RAGE pathway…	0	1.284	1.018	1.208	1.536	1.433	0.36	0.03	0.27	0.62	0.52	0.00229429	0.93926	0.79401	0.018777	0.199109	44.03	45.65	42.85	47.4	53.28	87.4
FALSE	High	Master Protein	P33981	Dual specificity protein kinase TTK OS=Homo sapiens OX=9606 GN=TTK PE=1 SV=2	0.005	FALSE	3.889	4	1	3	1	1	857	97	8.16	0	1	cell organization and biogenesis;metabolic process;regulation of biological process	chromosome;cytoplasm;membrane	catalytic activity;nucleotide binding;protein binding	Pf00069, Pf07714, Pf14531	7272	ENSG00000112742.9	TTK	6	Cell cycle	Retinoblastoma (RB) in Cancer	0	1.325	0.607	0.687	1.536	0.933	0.41	-0.72	-0.54	0.62	-0.1	0.788069	0.854075	0.770735	0.907732	0.983332	51.11	24.53	31.61	43.89	57.13	104.5
FALSE	High	Master Protein	Q9UHV9	Prefoldin subunit 2 OS=Homo sapiens OX=9606 GN=PFDN2 PE=1 SV=1	0	FALSE	39.175	32	5	57	5	1	154	16.6	6.58	171.89	5	metabolic process;regulation of biological process	cytoplasm;cytosol;mitochondrion;nucleus	protein binding	Pf01920	5202	ENSG00000143256.4	PFDN2	1			0	0.778	0.414	0.816	1.535	0.634	-0.36	-1.27	-0.29	0.62	-0.66	0.0399588	0.00215801	0.593877	0.077711	0.0727764	24.01	11.66	27.93	71.27	17.2	119.4
FALSE	High	Master Protein	P28072	Proteasome subunit beta type-6 OS=Homo sapiens OX=9606 GN=PSMB6 PE=1 SV=4	0	FALSE	51.236	38	6	47	6	1	239	25.3	4.92	164.98	6	metabolic process;regulation of biological process;response to stimulus;transport	cytoplasm;cytosol;nucleus;proteasome	catalytic activity;protein binding	Pf00227	5694	ENSG00000142507.9	PSMB6	17	Proteasome	Proteasome Degradation	0	1.029	0.618	1.001	1.535	0.996	0.04	-0.69	0	0.62	-0.01	0.892053	0.401375	0.988797	0.10159	0.995752	37.25	26.08	55.63	57.39	55.59	105.8
FALSE	High	Master Protein	Q9NP61	ADP-ribosylation factor GTPase-activating protein 3 OS=Homo sapiens OX=9606 GN=ARFGAP3 PE=1 SV=1	0	FALSE	20.286	12	5	11	5	1	516	56.9	7.36	23.91	5	regulation of biological process;transport	cytoplasm;cytosol;Golgi;membrane	enzyme regulator activity;metal ion binding;protein binding;transporter activity	Pf01412	26286	ENSG00000242247.10	ARFGAP3	22	Endocytosis		0	1.144	0.702	1.105	1.532	1.603	0.19	-0.51	0.14	0.62	0.68	0.759493	0.822608	0.988797	0.371512	0.314128	69.27	21.8	64.76	59.57	69.84	102.6
FALSE	High	Master Protein	P35251	Replication factor C subunit 1 OS=Homo sapiens OX=9606 GN=RFC1 PE=1 SV=4	0	FALSE	73.211	17	13	53	13	1	1148	128.2	9.36	142.15	13	cell organization and biogenesis;cellular homeostasis;metabolic process;regulation of biological process;response to stimulus	cytoplasm;nucleus	catalytic activity;DNA binding;enzyme regulator activity;nucleotide binding;protein binding	Pf00004, Pf00533, Pf03215, Pf05496, Pf06414, Pf08519, Pf12738, Pf13207, Pf13238	5981	ENSG00000035928.15	RFC1	4	DNA replication; Mismatch repair; Nucleotide excision repair	miRNA Regulation of DNA Damage Response; DNA Replication; Mismatch repair; DNA Damage Response	0	1.018	0.64	0.99	1.532	0.997	0.03	-0.64	-0.02	0.62	0	0.937707	0.598808	0.988797	0.181708	0.995752	44.81	20.99	49.57	42.41	44.78	103.8
FALSE	High	Master Protein	A6ND36	Protein FAM83G OS=Homo sapiens OX=9606 GN=FAM83G PE=1 SV=2	0.002	FALSE	4.415	1	1	2	1	1	823	90.8	6.39	3.78	1	regulation of biological process;response to stimulus	cytoplasm;cytosol;nucleus	protein binding	Pf07894, Pf13091	644815	ENSG00000188522.14	FAM83G	17			0	1.46	0.496	0.517	1.531	0.768	0.55	-1.01	-0.95	0.61	-0.38	0.634123	0.609422	0.373545	0.894398	0.897685	35.15	8.68	3.53	14.4	22.93	107
FALSE	High	None	Q9UKA9	Polypyrimidine tract-binding protein 2 OS=Homo sapiens OX=9606 GN=PTBP2 PE=1 SV=1	0	FALSE	6.688	2	1	33	0	2	531	57.5	8.66	65.18	1	cell organization and biogenesis;metabolic process;regulation of biological process	nucleus;spliceosomal complex	RNA binding	Pf00076, Pf13893, Pf14259	58155	ENSG00000117569.18	PTBP2	1		mRNA Processing; TarBasePathway	0	1.094	1.021	1.428	1.531	1.992	0.13	0.03	0.51	0.61	0.99	0.585013	0.95864	0.323049	0.109004	0.000714222	38.42	78.97	78.89	111.32	42.14	85.5
FALSE	High	Master Protein	Q96PV6	Leukocyte receptor cluster member 8 OS=Homo sapiens OX=9606 GN=LENG8 PE=1 SV=3	0	FALSE	14.959	7	3	5	3	1	800	88.1	9.11	17	3											0	0.842	1.042	1.855	1.53	1.653	-0.25	0.06	0.89	0.61	0.73	0.844455	0.983728	0.316411	0.719441	0.692325	27.27	44.26	48.13	62.27	44.57	94.6
FALSE	High	Master Protein	Q4G0A6	Probable ubiquitin carboxyl-terminal hydrolase MINDY-4 OS=Homo sapiens OX=9606 GN=MINDY4 PE=1 SV=2	0	FALSE	8.22	2	1	6	1	1	757	84.3	6.9	18.73	1	metabolic process		catalytic activity	Pf13898	84182	ENSG00000106125.14	FAM188B; MINDY4	7			0	1.045	0.9	1.165	1.53	1.217	0.06	-0.15	0.22	0.61	0.28	0.975156	0.999876	0.988797	0.908251	0.955706	35.19	45.7	65.28	64.92	65.28	98.8
FALSE	High	Master Protein	Q99471	Prefoldin subunit 5 OS=Homo sapiens OX=9606 GN=PFDN5 PE=1 SV=2	0	FALSE	35.85	50	5	19	5	1	154	17.3	6.33	75.56	5	metabolic process;regulation of biological process	cytoplasm;nucleus	protein binding	Pf02996	5204	ENSG00000123349.13	PFDN5	12			0	0.861	0.571	0.904	1.529	0.577	-0.22	-0.81	-0.15	0.61	-0.79	0.741567	0.336092	0.952468	0.636653	0.152865	46.17	34.33	75.29	100.32	29.73	193.4
FALSE	High	Master Protein	P62263	40S ribosomal protein S14 OS=Homo sapiens OX=9606 GN=RPS14 PE=1 SV=3	0	FALSE	78.053	68	8	81	8	1	151	16.3	10.05	248.6	8	cell differentiation;cell organization and biogenesis;metabolic process;regulation of biological process;transport	cytosol;membrane;mitochondrion;ribosome	protein binding;RNA binding;structural molecule activity;translation regulator activity	Pf00411	6208	ENSG00000164587.11	RPS14	5	Ribosome	Cytoplasmic Ribosomal Proteins	0	0.934	0.667	1.013	1.529	0.935	-0.1	-0.58	0.02	0.61	-0.1	0.937477	0.571073	0.994978	0.018777	0.969017	40.68	27.97	51.8	59.86	46.22	107.9
FALSE	Low	Master Protein	P17936	Insulin-like growth factor-binding protein 3 OS=Homo sapiens OX=9606 GN=IGFBP3 PE=1 SV=2	0.119	FALSE	1.24	7	1	1	1	1	291	31.7	8.69	0	1	cell death;cell differentiation;cell proliferation;metabolic process;regulation of biological process	extracellular;nucleus;organelle lumen	enzyme regulator activity;metal ion binding;protein binding	Pf00086, Pf00219	3486	ENSG00000146674.14	IGFBP3	7	Transcriptional misregulation in cancer; p53 signaling pathway	Senescence and Autophagy in Cancer; Photodynamic therapy-induced HIF-1 survival signaling; Myometrial Relaxation and Contraction Pathways	0	0.679	0.53	1.195	1.529	0.811	-0.56	-0.91	0.26	0.61	-0.3	0.738872	0.737191	0.988797	0.914435	0.929578	18.51	4.41	33.54	39.45	28.82	132.4
FALSE	High	Master Protein	P42695	Condensin-2 complex subunit D3 OS=Homo sapiens OX=9606 GN=NCAPD3 PE=1 SV=2	0	FALSE	9.852	2	2	6	2	1	1498	168.8	7.5	5.43	2	cell division;cell organization and biogenesis;metabolic process	membrane;nucleus	protein binding	Pf12717, Pf15058	23310	ENSG00000151503.12	NCAPD3	11			0	1.082	0.567	0.738	1.528	0.866	0.11	-0.82	-0.44	0.61	-0.21	0.979547	0.775289	0.871862	0.884511	0.947623	43.06	11.63	17.18	40.69	25.71	128.1
FALSE	High	Master Protein	Q13043	Serine/threonine-protein kinase 4 OS=Homo sapiens OX=9606 GN=STK4 PE=1 SV=2	0	FALSE	26.516	19	7	15	3	1	487	55.6	5.07	33.51	7	cell death;cell differentiation;cell organization and biogenesis;metabolic process;regulation of biological process;response to stimulus	cytoplasm;cytosol;nucleus	catalytic activity;enzyme regulator activity;metal ion binding;nucleotide binding;protein binding	Pf00069, Pf07714, Pf11629	6789	ENSG00000101109.11	STK4	20	FoxO signaling pathway; Non-small cell lung cancer; MAPK signaling pathway; Pathways in cancer; Ras signaling pathway		0	1.002	0.845	0.984	1.528	1.144	0	-0.24	-0.02	0.61	0.19	0.98899	0.980861	0.989368	0.71046	0.97414	27.93	15.58	22.74	41.9	39.02	116.8
FALSE	High	Master Protein	Q6ZUJ8	Phosphoinositide 3-kinase adapter protein 1 OS=Homo sapiens OX=9606 GN=PIK3AP1 PE=1 SV=2	0.005	FALSE	3.784	1	1	2	1	1	805	90.3	5.4	1.91	1	metabolic process;regulation of biological process;response to stimulus	cytoplasm;cytosol;membrane	catalytic activity;protein binding	Pf14545	118788	ENSG00000155629.14	PIK3AP1	10	B cell receptor signaling pathway; PI3K-Akt signaling pathway	B Cell Receptor Signaling Pathway	0	0.918	0.975	1.514	1.527	1.503	-0.12	-0.04	0.6	0.61	0.59	0.960998	0.999876	0.833466	0.803864	0.884211	43.67	42.88	23.36	9.74	39.42	91
FALSE	High	Master Protein	Q86YP4	Transcriptional repressor p66-alpha OS=Homo sapiens OX=9606 GN=GATAD2A PE=1 SV=1	0	FALSE	29.713	21	9	22	7	1	633	68	9.94	31.41	9	metabolic process;regulation of biological process	nucleus	DNA binding;metal ion binding;protein binding		54815	ENSG00000167491.17	GATAD2A	19			1	0.888	0.75	1.193	1.527	1.174	-0.17	-0.41	0.26	0.61	0.23	0.902551	0.91989	0.930012	0.440842	0.925543	28.81	15.94	79.36	60.1	73.17	99.7
FALSE	High	None	P14649	Myosin light chain 6B OS=Homo sapiens OX=9606 GN=MYL6B PE=1 SV=1	0	FALSE	12.053	12	2	16	2	1	208	22.8	5.73	32.52	2	cellular component movement	cytosol	catalytic activity;metal ion binding;motor activity;protein binding;structural molecule activity	Pf13405, Pf13499	140465	ENSG00000196465.10	MYL6B	12	Vascular smooth muscle contraction; Oxytocin signaling pathway		0	0.657	0.805	1.366	1.527	0.898	-0.61	-0.31	0.45	0.61	-0.15	0.033313	0.941119	0.695316	0.243796	0.936222	14.34	14.52	46.14	45.42	29.75	113.5
FALSE	High	Master Protein	Q9Y618	Nuclear receptor corepressor 2 OS=Homo sapiens OX=9606 GN=NCOR2 PE=1 SV=3	0	FALSE	14.519	2	4	11	4	1	2514	273.5	7.59	28.14	4											0	1.092	0.859	1.2	1.526	1.392	0.13	-0.22	0.26	0.61	0.48	0.912649	0.980835	0.94153	0.686208	0.839335	44.95	33.3	47.06	33.45	30	54.3
FALSE	High	Master Protein	Q16890	Tumor protein D53 OS=Homo sapiens OX=9606 GN=TPD52L1 PE=1 SV=1	0	FALSE	28.19	38	4	26	4	1	204	22.4	5.62	84.88	4	regulation of biological process	cytoplasm	protein binding	Pf04201	7164	ENSG00000111907.20	TPD52L1	6			0	0.888	1.186	1.882	1.526	1.701	-0.17	0.25	0.91	0.61	0.77	0.853978	0.798845	0.00780948	0.235045	0.145998	60.23	38.16	80.57	54.45	64.61	73.9
FALSE	High	Master Protein	Q6IAA8	Ragulator complex protein LAMTOR1 OS=Homo sapiens OX=9606 GN=LAMTOR1 PE=1 SV=2	0	FALSE	33.991	65	6	24	6	1	161	17.7	5.15	72.07	6	cell organization and biogenesis;regulation of biological process;response to stimulus;transport	endosome;membrane;vacuole	protein binding;structural molecule activity	Pf15454	55004	ENSG00000149357.9	LAMTOR1	11	mTOR signaling pathway		0	1.247	0.809	1.108	1.525	1.697	0.32	-0.31	0.15	0.61	0.76	0.143808	0.961568	0.988797	0.239889	0.0977971	34.95	55.05	48.85	66.46	55.34	73.7
FALSE	High	Master Protein	Q8IXQ6	Protein mono-ADP-ribosyltransferase PARP9 OS=Homo sapiens OX=9606 GN=PARP9 PE=1 SV=2	0	FALSE	45.581	15	10	15	10	1	854	96.3	7.91	33.16	10	cellular component movement;metabolic process;regulation of biological process;response to stimulus	cytoplasm;cytosol;membrane;mitochondrion;nucleus	catalytic activity;enzyme regulator activity;nucleotide binding;protein binding	Pf01661	83666	ENSG00000138496.16	PARP9	3			0	1.022	2.48	3.296	1.525	3.477	0.03	1.31	1.72	0.61	1.8	0.990085	0.0192966	2.57184e-06	0.244596	1.61745e-05	36.82	70.39	50.1	55.25	51.42	33.8
FALSE	High	Master Protein	Q13572	Inositol-tetrakisphosphate 1-kinase OS=Homo sapiens OX=9606 GN=ITPK1 PE=1 SV=2	0	FALSE	14.841	13	3	8	3	1	414	45.6	6.16	21.16	3	coagulation;metabolic process;regulation of biological process;response to stimulus	cytosol;membrane	catalytic activity;metal ion binding;nucleotide binding	Pf05770	3705	ENSG00000274958.4; ENSG00000100605.16	ITPK1	14; CHR_HSCHR14_7_CTG1	Phosphatidylinositol signaling system; Inositol phosphate metabolism; Metabolic pathways		0	0.94	0.697	1.111	1.524	1.114	-0.09	-0.52	0.15	0.61	0.16	0.952506	0.762184	0.985712	0.343296	0.965642	29.17	21.26	59.62	88.24	44.71	101.1
TRUE	High	Master Protein	Q9ULF5	Zinc transporter ZIP10 OS=Homo sapiens OX=9606 GN=SLC39A10 PE=1 SV=2	0	FALSE	30.727	10	6	16	6	1	831	94.1	6.76	30.61	6	cellular homeostasis;regulation of biological process;transport	membrane	transporter activity	Pf02535, Pf14667	57181	ENSG00000196950.13	SLC39A10	2		NRF2 pathway; Zinc homeostasis	0	0.828	0.185	0.368	1.522	0.302	-0.27	-2.44	-1.44	0.61	-1.73	0.530915	2.77284e-10	2.02649e-06	0.738643	4.45696e-06	34.33	1.88	9.73	68.51	7.73	169.3
FALSE	High	Master Protein	Q86U38	Nucleolar protein 9 OS=Homo sapiens OX=9606 GN=NOP9 PE=1 SV=1	0	FALSE	39.557	20	7	13	7	1	636	69.4	7.28	38.26	7			RNA binding		161424	ENSG00000196943.12	NOP9	14			0	0.969	0.598	0.635	1.522	0.91	-0.04	-0.74	-0.66	0.61	-0.14	0.987704	0.498691	0.126569	0.398978	0.949921	50.12	22.28	31.31	96.37	55.79	123.5
FALSE	Low	Master Protein	P19827	Inter-alpha-trypsin inhibitor heavy chain H1 OS=Homo sapiens OX=9606 GN=ITIH1 PE=1 SV=3	0.157	FALSE	1.066	2	1	1	1	1	911	101.3	6.79	0	1	metabolic process;regulation of biological process	extracellular	enzyme regulator activity;metal ion binding	Pf00092, Pf06668, Pf08487, Pf10138, Pf11775, Pf13519, Pf13768	3697	ENSG00000055957.10	ITIH1	3			0	0.01	0.677	100	1.522	1.089	-6.64	-0.56	6.64	0.61	0.12	4.12715e-16	0.912712	3.26911e-16	0.872949	0.995752		16.34		52.67	65.5	144.6
FALSE	High	Master Protein	O95714	E3 ubiquitin-protein ligase HERC2 OS=Homo sapiens OX=9606 GN=HERC2 PE=1 SV=2	0	FALSE	29.37	3	8	11	8	1	4834	526.9	6.28	10.73	8	metabolic process;response to stimulus;transport	cytoplasm;cytoskeleton;membrane;nucleus	catalytic activity;metal ion binding;protein binding	Pf00173, Pf00415, Pf00569, Pf00632, Pf03256, Pf06701, Pf11515, Pf13540	8924	ENSG00000128731.15	HERC2	15	Ubiquitin mediated proteolysis		0	1.058	0.655	0.968	1.521	0.97	0.08	-0.61	-0.05	0.61	-0.04	0.902551	0.616918	0.988797	0.272747	0.985533	39.21	14.95	51.24	40.18	46.63	121.2
FALSE	High	Master Protein	Q9BPX6	Calcium uptake protein 1, mitochondrial OS=Homo sapiens OX=9606 GN=MICU1 PE=1 SV=1	0	FALSE	9.598	5	2	13	2	1	476	54.3	8.41	39.85	2	cell organization and biogenesis;cellular homeostasis;defense response;response to stimulus;transport	membrane;mitochondrion	metal ion binding;protein binding	Pf13202	10367	ENSG00000107745.17	MICU1	10			0	1.014	1.146	1.099	1.521	1.177	0.02	0.2	0.14	0.6	0.23	0.991154	0.941119	0.995385	0.729746	0.963438	38.71	43.95	68.1	86.4	37.83	104.5
FALSE	High	Master Protein	O75446	Histone deacetylase complex subunit SAP30 OS=Homo sapiens OX=9606 GN=SAP30 PE=1 SV=1	0	FALSE	10.225	14	2	5	2	1	220	23.3	9.17	12.85	2	cell differentiation;cell organization and biogenesis;metabolic process;regulation of biological process	nucleus	catalytic activity;DNA binding;metal ion binding;protein binding	Pf13866, Pf13867	8819	ENSG00000164105.3	SAP30	4		Notch Signaling Pathway; Retinoblastoma (RB) in Cancer	0	0.773	0.808	1.268	1.52	1.044	-0.37	-0.31	0.34	0.6	0.06	0.598822	0.962137	0.905386	0.63927	0.999969	15.82	24.37	9.25	7.9	39.33	64.3
FALSE	High	Master Protein	P0CAP2	DNA-directed RNA polymerase II subunit GRINL1A OS=Homo sapiens OX=9606 GN=POLR2M PE=1 SV=1	0	FALSE	13.391	17	3	4	3	1	368	41.7	6.39	4.85	3	metabolic process	nucleus	catalytic activity	Pf15328	81488	ENSG00000255529.7	POLR2M	15			0	1.719	1.299	1.148	1.52	1.974	0.78	0.38	0.2	0.6	0.98	0.331203	0.869684	0.988797	0.82979	0.545146	12.49	12.16	14.07	13.7	12.93	66.7
FALSE	High	None	Q9BZD3	Putative GRINL1B complex locus protein 2 OS=Homo sapiens OX=9606 GN=GCOM2 PE=5 SV=2	0	FALSE	8.887	13	2	3	2	1	368	41.7	6.8	2.39	2				Pf15328	339970		GCOM2	4			0	1.719	1.299	1.148	1.52	1.974	0.78	0.38	0.2	0.6	0.98	0.331203	0.869684	0.988797	0.82979	0.545146	12.49	12.16	14.07	13.7	12.93	66.7
FALSE	High	None	Q93045	Stathmin-2 OS=Homo sapiens OX=9606 GN=STMN2 PE=1 SV=3	0	FALSE	36.798	12	5	44	5	1	179	20.8	8.32	108.15	5	metabolic process;regulation of biological process;response to stimulus	cytoplasm;endosome;Golgi;membrane	protein binding	Pf00836, Pf04111	11075	ENSG00000104435.13	STMN2	8			0	0.732	0.54	1.16	1.518	0.844	-0.45	-0.89	0.21	0.6	-0.25	0.00446674	0.0719227	0.923142	0.088397	0.872942	28.09	22.49	63.75	98.35	36.25	143.5
FALSE	High	Master Protein	Q969U7	Proteasome assembly chaperone 2 OS=Homo sapiens OX=9606 GN=PSMG2 PE=1 SV=1	0	FALSE	35.287	27	8	36	8	1	264	29.4	6.98	80.64	8	cell organization and biogenesis;regulation of biological process	cytosol;nucleus;proteasome	protein binding	Pf09754	56984	ENSG00000128789.20	PSMG2	18			0	0.899	0.663	1.029	1.517	0.993	-0.15	-0.59	0.04	0.6	-0.01	0.876913	0.666733	0.999922	0.264872	0.999969	33.71	20.07	52.92	64.49	50.49	81.8
FALSE	High	Master Protein	P49006	MARCKS-related protein OS=Homo sapiens OX=9606 GN=MARCKSL1 PE=1 SV=2	0	FALSE	21.212	62	4	31	4	1	195	19.5	4.67	27.17	4	regulation of biological process	cytoplasm;membrane	protein binding		65108	ENSG00000175130.6	MARCKSL1	1	Leishmaniasis; Fc gamma R-mediated phagocytosis		0	0.846	0.778	1.353	1.517	1.038	-0.24	-0.36	0.44	0.6	0.05	0.740686	0.895421	0.690256	0.297436	0.993441	26.3	19.65	88.01	88.71	106.31	112
FALSE	High	Master Protein	P16070	CD44 antigen OS=Homo sapiens OX=9606 GN=CD44 PE=1 SV=3	0	FALSE	53.611	11	7	76	7	1	742	81.5	5.33	185.91	7	cell organization and biogenesis;cellular component movement;metabolic process;regulation of biological process;response to stimulus;transport	cell surface;cytosol;Golgi;membrane	protein binding;receptor activity;signal transducer activity	Pf00193	960	ENSG00000026508.17	CD44	11	Hematopoietic cell lineage; MicroRNAs in cancer; Epstein-Barr virus infection; Proteoglycans in cancer; ECM-receptor interaction; Shigellosis	Hepatitis C and Hepatocellular Carcinoma; Wnt Signaling Pathway and Pluripotency; Senescence and Autophagy in Cancer	0	1.119	0.411	0.629	1.517	0.715	0.16	-1.28	-0.67	0.6	-0.48	0.0428229	0.000382331	0.0011276	0.0162623	0.179815	69.62	10.43	38.26	72.3	39.31	125.7
FALSE	Medium	None	Q92521	GPI mannosyltransferase 3 OS=Homo sapiens OX=9606 GN=PIGB PE=1 SV=1	0.029	FALSE	2.292	1	1	2	1	1	554	65	9.29	3.89	1	metabolic process	endoplasmic reticulum;membrane	catalytic activity	Pf03901	9488	ENSG00000069943.9	PIGB	15	Metabolic pathways; Glycosylphosphatidylinositol (GPI)-anchor biosynthesis		0	0.644	0.961	2.259	1.516	1.456	-0.63	-0.06	1.18	0.6	0.54	0.61317	0.999876	0.27455	0.885412	0.879504	0	0	0	0	0	98.5
FALSE	High	Master Protein	O95628	CCR4-NOT transcription complex subunit 4 OS=Homo sapiens OX=9606 GN=CNOT4 PE=1 SV=3	0	FALSE	11.791	6	2	3	2	1	575	63.5	7.03	5.82	2	metabolic process;regulation of biological process;response to stimulus	cytoplasm;cytosol;nucleus	catalytic activity;metal ion binding;protein binding;RNA binding	Pf00076, Pf13639, Pf13893, Pf13920, Pf13923, Pf14259, Pf14570	4850	ENSG00000080802.18	CNOT4	7	RNA degradation		0	1.141	0.9	1.061	1.515	1.309	0.19	-0.15	0.08	0.6	0.39	0.931016	0.999876	0.999922	0.840515	0.937856	35.66	29.12	17.11	56.55	41.28	115.6
FALSE	High	Master Protein	Q969E2	Secretory carrier-associated membrane protein 4 OS=Homo sapiens OX=9606 GN=SCAMP4 PE=1 SV=1	0.001	FALSE	5.94	5	1	10	1	1	229	25.7	8.82	27.96	1	transport	membrane		Pf04144	113178	ENSG00000227500.9	SCAMP4	19			0	0.823	0.856	0.993	1.515	0.81	-0.28	-0.22	-0.01	0.6	-0.3	0.786187	0.985944	0.988797	0.635538	0.839335	6.03	23.64	16.1	60.26	9.06	114
FALSE	High	Master Protein	Q9BRS2	Serine/threonine-protein kinase RIO1 OS=Homo sapiens OX=9606 GN=RIOK1 PE=1 SV=2	0	FALSE	16.31	9	3	9	3	1	568	65.5	6.19	26.44	3	metabolic process;regulation of biological process	cytoplasm;cytosol;membrane	catalytic activity;metal ion binding;nucleotide binding;protein binding;transporter activity	Pf01163, Pf06293	83732	ENSG00000124784.8	RIOK1	6	Ribosome biogenesis in eukaryotes		0	0.966	0.591	0.886	1.515	0.895	-0.05	-0.76	-0.17	0.6	-0.16	0.987704	0.577901	0.959036	0.745039	0.947623	32.93	8.51	19.03	44.14	29.6	105.5
FALSE	High	Master Protein	Q9HCN4	GPN-loop GTPase 1 OS=Homo sapiens OX=9606 GN=GPN1 PE=1 SV=1	0	FALSE	14.772	15	3	7	3	1	374	41.7	4.92	21.68	3		cytoplasm;cytosol;mitochondrion;nucleus	catalytic activity;nucleotide binding;protein binding	Pf01926, Pf03029, Pf12846, Pf13191, Pf13671	11321	ENSG00000198522.13	GPN1	2			0	0.859	1.08	1.353	1.515	1.144	-0.22	0.11	0.44	0.6	0.19	0.847085	0.96071	0.752221	0.462618	0.953713	41.55	34.11	55.96	57.56	49.69	92.6
FALSE	High	Master Protein	O15066	Kinesin-like protein KIF3B OS=Homo sapiens OX=9606 GN=KIF3B PE=1 SV=1	0	FALSE	14.622	6	3	3	3	1	747	85.1	7.69	5.93	3	cell organization and biogenesis;cellular component movement;regulation of biological process;transport	cytoplasm;cytoskeleton;cytosol;membrane	catalytic activity;motor activity;nucleotide binding;protein binding	Pf00225	9371	ENSG00000101350.7	KIF3B	20			0	0.829	0.923	1.534	1.514	1.218	-0.27	-0.12	0.62	0.6	0.28	0.89919	0.999876	0.825618	0.83972	0.969017	31	56.71	43.24	95.84	71.76	131.1
FALSE	High	Master Protein	Q9UBG0	C-type mannose receptor 2 OS=Homo sapiens OX=9606 GN=MRC2 PE=1 SV=2	0.001	FALSE	6.044	1	1	2	1	1	1479	166.6	5.83	6.47	1	cell differentiation;metabolic process;regulation of biological process;response to stimulus;transport	membrane	protein binding;receptor activity;signal transducer activity	Pf00040, Pf00059	9902	ENSG00000011028.13	MRC2	17	Tuberculosis; Phagosome		0	1.017	1.501	2.231	1.512	2.296	0.02	0.59	1.16	0.6	1.2	0.990689	0.611488	0.111348	0.743844	0.24174	28.96	34.79	32.22	37.97	18.63	70.2
FALSE	High	Master Protein	P02533	Keratin, type I cytoskeletal 14 OS=Homo sapiens OX=9606 GN=KRT14 PE=1 SV=4	0	FALSE	66.753	21	13	90	1	1	472	51.5	5.16	231.57	13	cell death;cell differentiation;cell organization and biogenesis;response to stimulus	cytoplasm;cytosol;nucleus	protein binding;structural molecule activity	Pf00038, Pf13514	3861	ENSG00000186847.5	KRT14	17		Corticotropin-releasing hormone signaling pathway	1	1.123		1.544	1.511	1.073	0.17		0.63	0.6	0.1	0.934025		0.826113	0.792933	0.995752	46.03		86.02	32.8	45.15	21.5
FALSE	High	Master Protein	Q92791	Endoplasmic reticulum protein SC65 OS=Homo sapiens OX=9606 GN=P3H4 PE=1 SV=1	0.002	FALSE	5.058	3	1	1	1	1	437	50.3	4.77	3.08	1	cell organization and biogenesis;metabolic process	chromosome;endoplasmic reticulum	protein binding		10609	ENSG00000141696.12	LEPREL4; P3H4	17			0	0.964	1.083	1.694	1.508	1.633	-0.05	0.11	0.76	0.59	0.71	0.979547	0.973826	0.5189	0.710321	0.589996	20.57	20.67	22.32	20.83	20.64	85.5
FALSE	High	Master Protein	P56937	3-keto-steroid reductase OS=Homo sapiens OX=9606 GN=HSD17B7 PE=1 SV=1	0	FALSE	15.149	13	3	6	3	1	341	38.2	8.1	17.02	3	metabolic process	endoplasmic reticulum;membrane	catalytic activity	Pf00106, Pf03435, Pf08659, Pf13460	51478	ENSG00000132196.13	HSD17B7	1	Ovarian steroidogenesis; Steroid biosynthesis; Metabolic pathways; Steroid hormone biosynthesis	Steroid Biosynthesis	0	0.927	0.587	0.909	1.507	0.872	-0.11	-0.77	-0.14	0.59	-0.2	0.940803	0.453791	0.935569	0.407596	0.914656	30.24	30.87	33.87	74.68	27.9	114.7
FALSE	High	Master Protein	Q8N9N8	Probable RNA-binding protein EIF1AD OS=Homo sapiens OX=9606 GN=EIF1AD PE=1 SV=1	0	FALSE	11.341	20	2	2	2	1	165	19	5.21	6.74	2	metabolic process	nucleus	protein binding;RNA binding	Pf01176	84285	ENSG00000175376.8	EIF1AD	11			0	1.244	0.462	0.652	1.507	0.769	0.32	-1.11	-0.62	0.59	-0.38	0.688668	0.243144	0.481144	0.745781	0.876517	38.5	6.63	14.66	34.93	17.31	126
FALSE	High	None	Q96RT6	cTAGE family member 2 OS=Homo sapiens OX=9606 GN=CTAGE1 PE=1 SV=2	0.002	FALSE	4.462	3	2	4	2	1	745	85.2	6.16	0	2	metabolic process;transport	membrane		Pf04111, Pf07926, Pf12325, Pf15619	64693	ENSG00000282841.1; ENSG00000212710.4	CTAGE1	18; CHR_HSCHR18_5_CTG1_1			0	1.152	0.642	0.796	1.506	0.918	0.2	-0.64	-0.33	0.59	-0.12	0.931016	0.872338	0.932633	0.909997	0.974264	58.87	13.13	55.05	100.1	73.12	129.1
FALSE	High	None	Q01629	Interferon-induced transmembrane protein 2 OS=Homo sapiens OX=9606 GN=IFITM2 PE=1 SV=2	0	FALSE	16.243	12	1	13	1	1	132	14.6	7.42	32.6	1	defense response;regulation of biological process;response to stimulus	membrane		Pf04505	10581	ENSG00000185201.16	IFITM2	11			0	1.484	0.987	2.341	1.506	2.351	0.57	-0.02	1.23	0.59	1.23	0.0740278	0.998631	0.00160866	0.416114	0.0102327	66.81	35.25	99.44	68.11	89.69	69.2
FALSE	High	Master Protein	Q01628	Interferon-induced transmembrane protein 3 OS=Homo sapiens OX=9606 GN=IFITM3 PE=1 SV=2	0	FALSE	17.786	30	2	14	2	1	133	14.6	7.01	32.6	2	defense response;regulation of biological process;response to stimulus	endosome;membrane;vacuole	protein binding	Pf04505	10410	ENSG00000142089.15	IFITM3	11			0	1.484	0.987	2.341	1.506	2.351	0.57	-0.02	1.23	0.59	1.23	0.0740278	0.998631	0.00160866	0.416114	0.0102327	66.81	35.25	99.44	68.11	89.69	69.2
FALSE	High	None	P13164	Interferon-induced transmembrane protein 1 OS=Homo sapiens OX=9606 GN=IFITM1 PE=1 SV=3	0	FALSE	16.243	13	1	13	1	1	125	14	7.93	32.6	1	defense response;regulation of biological process;response to stimulus	membrane	protein binding;signal transducer activity	Pf04505	8519	ENSG00000185885.15	IFITM1	11	B cell receptor signaling pathway		0	1.484	0.987	2.341	1.506	2.351	0.57	-0.02	1.23	0.59	1.23	0.0740278	0.998631	0.00160866	0.416114	0.0102327	66.81	35.25	99.44	68.11	89.69	69.2
FALSE	High	Master Protein	Q9H8H2	Probable ATP-dependent RNA helicase DDX31 OS=Homo sapiens OX=9606 GN=DDX31 PE=1 SV=2	0.002	FALSE	4.454	1	1	1	1	1	851	94	9.99	3.07	1	metabolic process	cytoplasm;Golgi;nucleus	catalytic activity;DNA binding;nucleotide binding;protein binding;RNA binding	Pf00270, Pf00271, Pf04851, Pf13959	64794	ENSG00000125485.17	DDX31	9			0	0.815	0.513	0.923	1.506	0.773	-0.3	-0.96	-0.12	0.59	-0.37	0.805653	0.322088	0.985712	0.755034	0.846431	9.44	2.94	13.87	24.52	9.25	129
FALSE	Medium	Master Protein	Q8WUH1	Protein Churchill OS=Homo sapiens OX=9606 GN=CHURC1 PE=1 SV=2	0.017	FALSE	2.772	13	1	1	1	1	139	16.1	5.54	0	1	development;metabolic process;regulation of biological process		metal ion binding	Pf06573	91612	ENSG00000258289.8	CHURC1	14			0	1.509	1.001	0.998	1.505	1.506	0.59	0	0	0.59	0.59	0.548998	0.99317	0.99903	0.842158	0.874277	0	0	0	0	0	79.7
FALSE	High	Master Protein	P20962	Parathymosin OS=Homo sapiens OX=9606 GN=PTMS PE=1 SV=2	0.001	FALSE	5.613	11	1	30	1	1	102	11.5	4.16	73.38	1	metabolic process	nucleus			5763	ENSG00000159335.15	PTMS	12			0	0.798	0.851	1.605	1.505	1.281	-0.33	-0.23	0.68	0.59	0.36	0.157107	0.974825	0.0488959	0.115784	0.526712	44.12	59.82	81.46	93.18	69.27	115.7
FALSE	High	Master Protein	O60925	Prefoldin subunit 1 OS=Homo sapiens OX=9606 GN=PFDN1 PE=1 SV=2	0	FALSE	10.838	17	2	4	2	1	122	14.2	6.81	12.14	2	cell organization and biogenesis;metabolic process;regulation of biological process	cytoplasm	protein binding	Pf01920	5201	ENSG00000113068.9	PFDN1	5			0	0.637	1.464	1.059	1.503	0.529	-0.65	0.55	0.08	0.59	-0.92	0.312544	0.775935	0.999922	0.854212	0.362242	44.7	178.09	70.69	66.42	25.03	183.6
FALSE	High	Master Protein Candidate	Q969Q0	60S ribosomal protein L36a-like OS=Homo sapiens OX=9606 GN=RPL36AL PE=1 SV=3	0	FALSE	11.812	28	3	15	3	1	106	12.5	10.65	24.61	3	metabolic process	cytoplasm;cytosol;membrane;nucleus;ribosome	protein binding;structural molecule activity	Pf00935	6166	ENSG00000165502.6	RPL36AL	14	Ribosome		0	0.831	0.628	0.764	1.503	0.888	-0.27	-0.67	-0.39	0.59	-0.17	0.69648	0.601686	0.615688	0.481399	0.93056	40.75	25.66	23.51	52.83	38.49	124.8
FALSE	High	Master Protein	P83881	60S ribosomal protein L36a OS=Homo sapiens OX=9606 GN=RPL36A PE=1 SV=2	0	FALSE	11.812	28	3	15	3	1	106	12.4	10.58	24.61	3	cell organization and biogenesis;metabolic process;transport	cytoplasm;cytosol;membrane;ribosome	protein binding;RNA binding;structural molecule activity	Pf00935	6173	ENSG00000241343.9	RPL36A	X	Ribosome	Cytoplasmic Ribosomal Proteins	0	0.831	0.628	0.764	1.503	0.888	-0.27	-0.67	-0.39	0.59	-0.17	0.69648	0.601686	0.615688	0.481399	0.93056	40.75	25.66	23.51	52.83	38.49	124.8
FALSE	High	Master Protein	Q9Y478	5'-AMP-activated protein kinase subunit beta-1 OS=Homo sapiens OX=9606 GN=PRKAB1 PE=1 SV=4	0	FALSE	14.653	16	2	10	2	1	270	30.4	6.4	33.54	2	cell communication;cell organization and biogenesis;metabolic process;regulation of biological process;response to stimulus	cytosol;nucleus	catalytic activity;protein binding	Pf02922, Pf04739	5564	ENSG00000111725.10	PRKAB1	12	Longevity regulating pathway - multiple species; Insulin signaling pathway; FoxO signaling pathway; Oxytocin signaling pathway; Glucagon signaling pathway; AMPK signaling pathway; Non-alcoholic fatty liver disease (NAFLD); Circadian rhythm; Insulin resistance; Adipocytokine signaling pathway; Longevity regulating pathway; Hypertrophic cardiomyopathy (HCM)	Leptin and adiponectin; Sterol Regulatory Element-Binding Proteins (SREBP) signalling; Angiopoietin Like Protein 8 Regulatory Pathway; AMP-activated Protein Kinase (AMPK) Signaling; Factors and pathways affecting insulin-like growth factor (IGF1)-Akt signaling; Target Of Rapamycin (TOR) Signaling; Energy Metabolism	0	0.986	0.72	1.073	1.503	1.057	-0.02	-0.47	0.1	0.59	0.08	0.999944	0.87164	0.994168	0.481177	0.985678	39.24	33.82	37.23	62.57	34.77	123.6
FALSE	Low	None	Q8NI35	InaD-like protein OS=Homo sapiens OX=9606 GN=PATJ PE=1 SV=3	0.082	FALSE	1.531	0	1	12	1	1	1801	196.2	4.94	13.79	1	cell organization and biogenesis;regulation of biological process;response to stimulus	cytoplasm;cytosol;membrane	protein binding	Pf00595, Pf09045, Pf13180	10207	ENSG00000132849.19	INADL; PATJ	1	Tight junction; Hippo signaling pathway		0	1.405	1.045	1.235	1.503	1.533	0.49	0.06	0.3	0.59	0.62	0.496531	0.990434	0.963992	0.758789	0.725615	41.02	9.6	43.47	23.51	18.73	81.1
FALSE	High	Master Protein	Q9H9C1	Spermatogenesis-defective protein 39 homolog OS=Homo sapiens OX=9606 GN=VIPAS39 PE=1 SV=1	0	FALSE	31.548	17	6	11	6	1	493	57	7.4	30.96	6	cell differentiation;cell organization and biogenesis;metabolic process;regulation of biological process;transport	cytoplasm;endosome;Golgi	protein binding	Pf09787	63894	ENSG00000151445.15	VIPAS39	14			0	1.286	1.096	1.313	1.501	1.324	0.36	0.13	0.39	0.59	0.41	0.50533	0.961568	0.833466	0.502824	0.848421	54.66	75.9	52.73	82.06	84.1	80.6
FALSE	High	Master Protein	P07902	Galactose-1-phosphate uridylyltransferase OS=Homo sapiens OX=9606 GN=GALT PE=1 SV=3	0	FALSE	10.439	11	2	6	2	1	379	43.3	6.99	17.32	2	metabolic process	cytosol;Golgi	catalytic activity;metal ion binding;protein binding	Pf01087, Pf02744	2592	ENSG00000213930.11	GALT	9	Prolactin signaling pathway; Galactose metabolism; Amino sugar and nucleotide sugar metabolism; Metabolic pathways		0	0.514	0.751	2.243	1.5	1.154	-0.96	-0.41	1.17	0.58	0.21	0.0030037	0.941119	0.0832277	0.636653	0.966327	22.48	48	30.09	31.39	83.69	117
FALSE	High	None	Q9UPE1	SRSF protein kinase 3 OS=Homo sapiens OX=9606 GN=SRPK3 PE=1 SV=2	0	FALSE	8.369	4	2	5	0	2	567	62	7.25	6.39	2	cell differentiation;cell organization and biogenesis;development;metabolic process;regulation of biological process;response to stimulus	cytoplasm;nucleus	catalytic activity;nucleotide binding;protein binding	Pf00069, Pf07714	26576	ENSG00000184343.10	SRPK3	X			0	0.764	0.61	1.122	1.499	0.714	-0.39	-0.71	0.17	0.58	-0.49	0.824783	0.84148	0.994804	0.905724	0.854247	18.72	18.62	20.77	33.24	0.2	136.9
FALSE	High	Master Protein	Q3KQU3	MAP7 domain-containing protein 1 OS=Homo sapiens OX=9606 GN=MAP7D1 PE=1 SV=1	0	FALSE	11.73	3	2	3	2	1	841	92.8	10.11	8.56	2	cell organization and biogenesis	cytoplasm;cytoskeleton;cytosol	structural molecule activity		55700	ENSG00000116871.15	MAP7D1	1			0	1.148	0.923	1.338	1.499	1.707	0.2	-0.12	0.42	0.58	0.77	0.877245	0.999876	0.910291	0.755034	0.692325	87.45	60.29	88.57	26.29	56.52	58.2
FALSE	High	Master Protein	Q9UI30	Multifunctional methyltransferase subunit TRM112-like protein OS=Homo sapiens OX=9606 GN=TRMT112 PE=1 SV=1	0	FALSE	26.625	42	4	20	4	1	125	14.2	5.26	73.69	4	cell organization and biogenesis;metabolic process;regulation of biological process	cytoplasm;cytosol;nucleus	catalytic activity;protein binding	Pf03966	51504	ENSG00000173113.6	TRMT112	11			0	0.949	0.56	0.92	1.499	0.83	-0.08	-0.84	-0.12	0.58	-0.27	0.981907	0.118265	0.903379	0.160983	0.79596	17.85	5.43	23.32	28.05	20.06	121.6
FALSE	High	None	Q5SRD0	WASH complex subunit 2D OS=Homo sapiens OX=9606 GN=WASHC2D PE=3 SV=2	0	FALSE	15.403	12	2	9	0	2	308	33.4	5.35	34.87	2	transport	cytosol;endosome		Pf15255			FAM21D				0	1.163	0.907	1.022	1.496	1.189	0.22	-0.14	0.03	0.58	0.25	0.811575	0.999876	0.996341	0.759028	0.954205	48.54	32.76	34.81	32.05	39.25	85
FALSE	High	None	Q15173	Serine/threonine-protein phosphatase 2A 56 kDa regulatory subunit beta isoform OS=Homo sapiens OX=9606 GN=PPP2R5B PE=1 SV=1	0.004	FALSE	4.031	2	1	1	0	3	497	57.4	6.71	2.77	1	regulation of biological process;response to stimulus	cytoplasm;cytosol	enzyme regulator activity;protein binding	Pf01603	5526	ENSG00000068971.13	PPP2R5B	11	Dopaminergic synapse; Adrenergic signaling in cardiomyocytes; AMPK signaling pathway; mRNA surveillance pathway; Oocyte meiosis; Sphingolipid signaling pathway; PI3K-Akt signaling pathway	Focal Adhesion-PI3K-Akt-mTOR-signaling pathway; Glycogen Metabolism	0	0.78	0.602	1.154	1.495	0.9	-0.36	-0.73	0.21	0.58	-0.15	0.863866	0.829495	0.988797	0.919559	0.970959	12.89	7.13	32.29	33.15	26.51	121.9
FALSE	High	Master Protein	Q86V81	THO complex subunit 4 OS=Homo sapiens OX=9606 GN=ALYREF PE=1 SV=3	0	FALSE	77.96	46	8	75	8	1	257	26.9	11.15	275.77	8	cell differentiation;metabolic process;regulation of biological process;response to stimulus;transport	cytoplasm;cytosol;membrane;nucleus;spliceosomal complex	protein binding;RNA binding	Pf00076, Pf13893, Pf14259	10189		ALYREF	17	Spliceosome; mRNA surveillance pathway; RNA transport; Herpes simplex infection		0	1.014	0.67	1.042	1.495	1	0.02	-0.58	0.06	0.58	0	0.902551	0.656035	0.999922	0.0352848	0.993083	32.78	23.46	35.61	51.53	41.07	115.5
FALSE	High	Master Protein	Q8TEB1	DDB1- and CUL4-associated factor 11 OS=Homo sapiens OX=9606 GN=DCAF11 PE=1 SV=1	0	FALSE	14.834	10	3	6	3	1	546	61.6	6.4	16.06	3	metabolic process		protein binding	Pf00400	80344	ENSG00000100897.17	DCAF11	14			0	1.143	1.236	1.338	1.494	1.594	0.19	0.31	0.42	0.58	0.67	0.931016	0.853313	0.887773	0.585758	0.818074	38.26	38.2	31.54	48	35.85	19.6
FALSE	High	Master Protein	P40425	Pre-B-cell leukemia transcription factor 2 OS=Homo sapiens OX=9606 GN=PBX2 PE=1 SV=2	0	FALSE	11.221	9	2	9	2	1	430	45.9	7.56	23.19	2	metabolic process;regulation of biological process	nucleus	DNA binding;protein binding	Pf00046, Pf03792, Pf05920	5089	ENSG00000232005.7; ENSG00000236353.7; ENSG00000206315.9; ENSG00000237344.7; ENSG00000224952.7; ENSG00000225987.7; ENSG00000204304.11	PBX2	6; CHR_HSCHR6_MHC_MANN_CTG1; CHR_HSCHR6_MHC_MCF_CTG1; CHR_HSCHR6_MHC_QBL_CTG1; CHR_HSCHR6_MHC_COX_CTG1; CHR_HSCHR6_MHC_SSTO_CTG1; CHR_HSCHR6_MHC_APD_CTG1			0	0.974	0.844	1.103	1.494	1.01	-0.04	-0.24	0.14	0.58	0.01	0.986042	0.995352	0.996247	0.789382	0.991757	22.62	38.06	45.46	16.33	45.45	62.7
FALSE	High	Master Protein	O75122	CLIP-associating protein 2 OS=Homo sapiens OX=9606 GN=CLASP2 PE=1 SV=3	0	FALSE	28.442	5	5	21	2	1	1294	141	8.4	56.46	5											0	1.515	0.961	0.947	1.494	1.435	0.6	-0.06	-0.08	0.58	0.52	0.28681	0.999876	0.988797	0.779944	0.882144	108.27	30.41	104.27	35.35	10.42	81.5
FALSE	Medium	Master Protein	Q9Y221	60S ribosome subunit biogenesis protein NIP7 homolog OS=Homo sapiens OX=9606 GN=NIP7 PE=1 SV=1	0.046	FALSE	1.98	11	1	3	1	1	180	20.4	8.51	5.23	1	cell organization and biogenesis	cytosol;nucleus	protein binding;RNA binding	Pf03657	51388	ENSG00000132603.13	NIP7	16			0	2.927	2.083	1.063	1.494	3.111	1.55	1.06	0.09	0.58	1.64	7.6305e-05	0.327272	0.999922	0.760204	0.0419328	129.17	129.17	0	0	129.17	43.9
FALSE	High	Master Protein	Q6PJT7	Zinc finger CCCH domain-containing protein 14 OS=Homo sapiens OX=9606 GN=ZC3H14 PE=1 SV=1	0	FALSE	38.426	14	7	21	7	1	736	82.8	7.31	39.07	7	regulation of biological process	cytoplasm;nucleus	metal ion binding;protein binding;RNA binding	Pf14608	79882	ENSG00000100722.18	ZC3H14	14			0	0.929	0.716	1.103	1.493	1.058	-0.11	-0.48	0.14	0.58	0.08	0.960998	0.919305	0.988797	0.68002	0.995752	32.21	23.95	47.2	42.82	30.5	118.7
FALSE	Medium	Master Protein	P06213	Insulin receptor OS=Homo sapiens OX=9606 GN=INSR PE=1 SV=4	0.017	FALSE	2.74	1	1	3	1	1	1382	156.2	6.2	0	1	cell organization and biogenesis;metabolic process;regulation of biological process;response to stimulus	membrane;organelle lumen	catalytic activity;nucleotide binding;protein binding;receptor activity;signal transducer activity	Pf00041, Pf00069, Pf00757, Pf01030, Pf07714	3643	ENSG00000171105.13	INSR	19	Longevity regulating pathway - multiple species; Insulin signaling pathway; HIF-1 signaling pathway; Ovarian steroidogenesis; FoxO signaling pathway; Phospholipase D signaling pathway; cGMP-PKG signaling pathway; Rap1 signaling pathway; Type II diabetes mellitus; AMPK signaling pathway; mTOR signaling pathway; Aldosterone-regulated sodium reabsorption; Adherens junction; Non-alcoholic fatty liver…	Insulin Signaling; Selenium Micronutrient Network; Focal Adhesion-PI3K-Akt-mTOR-signaling pathway; Nanoparticle triggered autophagic cell death; AMP-activated Protein Kinase (AMPK) Signaling; Angiopoietin Like Protein 8 Regulatory Pathway; Vitamin B12 Metabolism; Folate Metabolism; Leptin Insulin Overlap; Transcription factor regulation in adipogenesis; Type II diabetes mellitus; DNA Damage Respo…	0	1.096	0.442	0.602	1.493	0.66	0.13	-1.18	-0.73	0.58	-0.6	0.947283	0.498691	0.528929	0.932277	0.804817	57.12	2.48	29.57	111.09	49.63	125.1
FALSE	Medium	Master Protein	P48553	Trafficking protein particle complex subunit 10 OS=Homo sapiens OX=9606 GN=TRAPPC10 PE=1 SV=2	0.01	FALSE	3.111	1	1	1	1	1	1259	142.1	6.04	2.62	1	cell organization and biogenesis;transport	cytosol;Golgi;membrane	protein binding;transporter activity	Pf11817, Pf12584	7109	ENSG00000160218.12	TRAPPC10	21			0	1.576	1.042	0.987	1.492	1.555	0.66	0.06	-0.02	0.58	0.64	0.50633	0.980861	0.998093	0.836766	0.859131	0	0	0	0	0	77.3
FALSE	High	Master Protein	Q9NZW5	MAGUK p55 subfamily member 6 OS=Homo sapiens OX=9606 GN=MPP6 PE=1 SV=2	0	FALSE	39.607	23	9	23	8	1	540	61.1	6.18	43.9	9	cell organization and biogenesis	membrane	protein binding	Pf00018, Pf00595, Pf00625, Pf02828, Pf07653, Pf13180, Pf14604, Pf14685	51678	ENSG00000105926.15	MPP6	7			0	1.045	0.555	0.753	1.492	0.8	0.06	-0.85	-0.41	0.58	-0.32	0.924064	0.288347	0.449734	0.46263	0.840598	48.69	10.62	27.39	48.96	19.33	138.8
FALSE	High	Master Protein	Q5JSH3	WD repeat-containing protein 44 OS=Homo sapiens OX=9606 GN=WDR44 PE=1 SV=1	0	FALSE	62.184	19	12	53	12	1	913	101.3	5.45	87.24	12		cytoplasm;cytosol;endosome;Golgi;membrane	protein binding	Pf00400	54521	ENSG00000131725.13	WDR44	X		Ectoderm Differentiation	0	0.909	0.59	0.925	1.492	0.917	-0.14	-0.76	-0.11	0.58	-0.13	0.902551	0.4354	0.94153	0.319246	0.959546	50.32	14.77	56.72	57.13	48.16	115.9
FALSE	High	Master Protein	P40222	Alpha-taxilin OS=Homo sapiens OX=9606 GN=TXLNA PE=1 SV=3	0	FALSE	55.05	34	11	46	11	1	546	61.9	6.52	88.16	11	cell proliferation;regulation of biological process;transport	cytoplasm;cytosol;extracellular;membrane	protein binding	Pf09728	200081	ENSG00000084652.15	TXLNA	1			0	0.881	0.635	1.033	1.491	0.92	-0.18	-0.66	0.05	0.58	-0.12	0.825423	0.582208	0.999922	0.307571	0.963463	30.75	18.32	52.7	45.62	24.33	124.3
FALSE	High	Master Protein	Q9UI14	Prenylated Rab acceptor protein 1 OS=Homo sapiens OX=9606 GN=RABAC1 PE=1 SV=1	0	FALSE	10.6	16	2	5	2	1	185	20.6	7.34	16.74	2		cytoplasm;Golgi;membrane	protein binding	Pf03208	10567	ENSG00000105404.10	RABAC1	19			0	1.316	1.222	1.421	1.491	1.457	0.4	0.29	0.51	0.58	0.54	0.300792	0.847481	0.565022	0.445493	0.593317	29.42	52.64	49.28	34.4	56.68	87.7
FALSE	High	Master Protein	P15153	Ras-related C3 botulinum toxin substrate 2 OS=Homo sapiens OX=9606 GN=RAC2 PE=1 SV=1	0	FALSE	34.986	44	8	59	4	1	192	21.4	7.61	137.55	8	cell organization and biogenesis;regulation of biological process;response to stimulus	cytoplasm;cytosol;membrane	catalytic activity;enzyme regulator activity;nucleotide binding;protein binding	Pf00025, Pf00071, Pf08477	5880	ENSG00000128340.14	RAC2	22	Pancreatic cancer; B cell receptor signaling pathway; VEGF signaling pathway; Rap1 signaling pathway; MAPK signaling pathway; Colorectal cancer; Natural killer cell mediated cytotoxicity; Pathways in cancer; Wnt signaling pathway; Focal adhesion; Choline metabolism in cancer; Adherens junction; Regulation of actin cytoskeleton; Leukocyte transendothelial migration; Sphingolipid signaling pathway;…	Focal Adhesion; Regulation of Actin Cytoskeleton; Microglia Pathogen Phagocytosis Pathway; DNA Damage Response (only ATM dependent); RalA downstream regulated genes; MAPK Signaling Pathway; Integrin-mediated Cell Adhesion; B Cell Receptor Signaling Pathway; Chemokine signaling pathway; Insulin Signaling	0	0.887	0.603	1.073	1.49	0.904	-0.17	-0.73	0.1	0.58	-0.15	0.847085	0.424084	0.994465	0.319246	0.934089	24.85	9.74	38	45.99	30.26	109.5
FALSE	High	Master Protein	P62917	60S ribosomal protein L8 OS=Homo sapiens OX=9606 GN=RPL8 PE=1 SV=2	0	FALSE	124.178	54	11	138	11	1	257	28	11.03	424.37	11	cell organization and biogenesis;metabolic process;response to stimulus;transport	cytoplasm;cytosol;membrane;ribosome	RNA binding;structural molecule activity	Pf00181, Pf03947	6132	ENSG00000161016.17	RPL8	8	Ribosome	Cytoplasmic Ribosomal Proteins	0	0.913	0.823	1.176	1.49	0.944	-0.13	-0.28	0.23	0.57	-0.08	0.870479	0.962137	0.870895	0.0331802	0.975532	41.84	39.96	63.11	64.54	67.23	109
FALSE	High	Master Protein	Q9Y3D3	28S ribosomal protein S16, mitochondrial OS=Homo sapiens OX=9606 GN=MRPS16 PE=1 SV=1	0	FALSE	24.143	54	5	33	5	1	137	15.3	9.5	75.63	5	cell organization and biogenesis;metabolic process	cytosol;membrane;mitochondrion;ribosome	protein binding;structural molecule activity	Pf00886	51021	ENSG00000182180.13	MRPS16	10	Ribosome		0	0.866	0.866	1.352	1.489	1.077	-0.21	-0.21	0.43	0.57	0.11	0.768071	0.999876	0.575666	0.289274	0.965371	27.6	29.97	51.13	46.26	57.78	107.7
FALSE	High	Master Protein	Q8IYI6	Exocyst complex component 8 OS=Homo sapiens OX=9606 GN=EXOC8 PE=1 SV=2	0	FALSE	36.562	16	7	15	7	1	725	81.7	5.49	32.55	7	cell organization and biogenesis;regulation of biological process;transport	cytoplasm;cytosol;endosome;membrane	protein binding	Pf00169, Pf08700	149371	ENSG00000116903.7	EXOC8	1		RalA downstream regulated genes	0	0.782	0.594	1.337	1.489	0.887	-0.35	-0.75	0.42	0.57	-0.17	0.40176	0.382163	0.645994	0.328453	0.929578	38.1	20.4	79.05	86.31	74.9	87.6
FALSE	High	Master Protein	Q96F24	Nuclear receptor-binding factor 2 OS=Homo sapiens OX=9606 GN=NRBF2 PE=1 SV=1	0	FALSE	9.675	15	2	4	2	1	287	32.4	5.87	5.79	2	metabolic process;regulation of biological process;response to stimulus	cytoplasm;nucleus;vacuole	DNA binding;protein binding	Pf02183, Pf04212, Pf04977, Pf08961	29982	ENSG00000148572.15	NRBF2	10			0	0.976	0.86	2.472	1.489	1.47	-0.04	-0.22	1.31	0.57	0.56	0.990311	0.999876	0.124102	0.817688	0.88909	50.26	61.64	224.93	88.14	60.17	102
FALSE	High	Master Protein	O43760	Synaptogyrin-2 OS=Homo sapiens OX=9606 GN=SYNGR2 PE=1 SV=1	0	FALSE	7.254	7	2	9	2	1	224	24.8	4.94	19.63	2	cell organization and biogenesis;transport	membrane	protein binding	Pf01284	9144	ENSG00000108639.7	SYNGR2	17			0	0.929	1.84	4.568	1.489	2.724	-0.11	0.88	2.19	0.57	1.45	0.949834	0.288008	1.15596e-05	0.642479	0.0101988	32.95	85.03	124.8	48.01	105.26	70.7
FALSE	Low	Master Protein	Q5TBA9	Protein furry homolog OS=Homo sapiens OX=9606 GN=FRY PE=1 SV=1	0.163	FALSE	1.046	0	1	3	1	1	3013	338.7	5.99	0	1	cell organization and biogenesis;regulation of biological process	cytoplasm;cytoskeleton	enzyme regulator activity	Pf14222, Pf14225, Pf14228	10129	ENSG00000073910.19	FRY	13			0	0.945	0.756	1.19	1.488	1.226	-0.08	-0.4	0.25	0.57	0.29	0.981907	0.961568	0.988797	0.83972	0.965819	41.21	23.6	66.92	21.91	32.32	104.6
FALSE	High	Master Protein	P26038	Moesin OS=Homo sapiens OX=9606 GN=MSN PE=1 SV=3	0	FALSE	354.753	68	47	695	32	1	577	67.8	6.4	1725.8	47	cell differentiation;cell organization and biogenesis;cell proliferation;cellular component movement;regulation of biological process;response to stimulus	cell surface;cytoplasm;cytoskeleton;cytosol;membrane;nucleus	protein binding;RNA binding;structural molecule activity	Pf00373, Pf00769, Pf09379, Pf09380	4478	ENSG00000147065.16	MSN	X	Proteoglycans in cancer; Regulation of actin cytoskeleton; Leukocyte transendothelial migration; Measles	Glial Cell Differentiation; Regulation of Actin Cytoskeleton; AGE/RAGE pathway	4	0.974	0.8	1.196	1.488	1.101	-0.04	-0.32	0.26	0.57	0.14	0.961148	0.941119	0.770735	0.0264131	0.879504	49.23	32.94	56.63	67.91	70.03	94.1
FALSE	High	Master Protein	P30260	Cell division cycle protein 27 homolog OS=Homo sapiens OX=9606 GN=CDC27 PE=1 SV=2	0	FALSE	45.368	19	8	40	8	1	824	91.8	7.02	115.1	8	cell proliferation;metabolic process;regulation of biological process	cytoplasm;cytosol;nucleus	protein binding	Pf00515, Pf05109, Pf07719, Pf12895, Pf13181, Pf13414, Pf13424, Pf13431, Pf13432, Pf14559	996	ENSG00000004897.11	CDC27	17	Ubiquitin mediated proteolysis; Progesterone-mediated oocyte maturation; HTLV-I infection; Oocyte meiosis; Cell cycle		0	0.895	0.837	1.164	1.487	1.122	-0.16	-0.26	0.22	0.57	0.17	0.863173	0.984351	0.948365	0.313992	0.93056	35.69	27.89	55.99	44.27	48.51	114.7
FALSE	High	None	Q2VIQ3	Chromosome-associated kinesin KIF4B OS=Homo sapiens OX=9606 GN=KIF4B PE=2 SV=2	0	FALSE	39.925	8	6	20	5	1	1234	139.9	6.18	57.78	6	cell organization and biogenesis;cellular component movement;metabolic process;transport	cytoplasm;cytoskeleton;cytosol;nucleus	catalytic activity;DNA binding;metal ion binding;motor activity;nucleotide binding;protein binding;transporter activity	Pf00225, Pf01496, Pf04111, Pf05033, Pf05262, Pf06785, Pf07888, Pf09726, Pf09731, Pf12128	285643	ENSG00000226650.5	KIF4B	5			0	0.776	0.591	1.092	1.487	0.742	-0.37	-0.76	0.13	0.57	-0.43	0.377372	0.456834	0.99291	0.455565	0.66725	23.45	24.2	35.04	42.18	34.96	158.7
FALSE	High	Master Protein	Q5VV42	Threonylcarbamoyladenosine tRNA methylthiotransferase OS=Homo sapiens OX=9606 GN=CDKAL1 PE=1 SV=1	0	FALSE	11.873	6	3	5	3	1	579	65.1	7.46	11.8	3	metabolic process	endoplasmic reticulum;membrane	catalytic activity;metal ion binding;protein binding	Pf00919, Pf04055	54901	ENSG00000145996.11	CDKAL1	6			0	1.002	0.671	0.781	1.486	1.23	0	-0.57	-0.36	0.57	0.3	0.992692	0.875164	0.831123	0.772551	0.944771	29.82	34.26	28.12	72.11	40.25	68.5
FALSE	Medium	Master Protein	Q9H410	Kinetochore-associated protein DSN1 homolog OS=Homo sapiens OX=9606 GN=DSN1 PE=1 SV=2	0.023	FALSE	2.514	2	1	2	1	1	356	40	7.05	3.64	1	cell division;cell organization and biogenesis;transport	chromosome;cytosol;extracellular;nucleus;organelle lumen	protein binding	Pf08202	79980	ENSG00000149636.15	DSN1	20			0	1.344	1.02	1.128	1.486	1.516	0.43	0.03	0.17	0.57	0.6	0.771457	0.98124	0.994465	0.904759	0.839335	61.25	93.22	52.49	29.85	76.32	82
FALSE	High	None	O15405	TOX high mobility group box family member 3 OS=Homo sapiens OX=9606 GN=TOX3 PE=1 SV=2	0	FALSE	6.969	2	1	3	1	1	576	63.3	7.85	10.58	1	cell death;metabolic process;regulation of biological process	nucleus	DNA binding;protein binding	Pf00505, Pf09011	27324	ENSG00000103460.16	TOX3	16		Mesodermal Commitment Pathway; Ectoderm Differentiation	0	1.301	0.696	0.937	1.485	1.219	0.38	-0.52	-0.09	0.57	0.29	0.459867	0.879043	0.982604	0.656773	0.925135	46.2	21.29	62.12	49.25	68.22	119.2
FALSE	High	None	Q96NM4	TOX high mobility group box family member 2 OS=Homo sapiens OX=9606 GN=TOX2 PE=2 SV=2	0	FALSE	6.969	3	1	3	1	1	488	51.6	6.71	10.58	1	metabolic process;regulation of biological process	nucleus	DNA binding	Pf00505, Pf09011	84969	ENSG00000124191.17	TOX2	20			0	1.301	0.696	0.937	1.485	1.219	0.38	-0.52	-0.09	0.57	0.29	0.459867	0.879043	0.982604	0.656773	0.925135	46.2	21.29	62.12	49.25	68.22	119.2
FALSE	High	Master Protein	P04818	Thymidylate synthase OS=Homo sapiens OX=9606 GN=TYMS PE=1 SV=3	0	FALSE	33.243	23	5	17	5	1	313	35.7	7.01	51.1	5	metabolic process;regulation of biological process;response to stimulus	cytoplasm;cytosol;membrane;mitochondrion;nucleus;organelle lumen	catalytic activity;nucleotide binding;protein binding;RNA binding;translation regulator activity	Pf00303	7298	ENSG00000176890.15	TYMS	18	Antifolate resistance; One carbon pool by folate; Metabolic pathways; Pyrimidine metabolism	One carbon metabolism and related pathways; Retinoblastoma (RB) in Cancer; One Carbon Metabolism; Trans-sulfuration and one carbon metabolism; Fluoropyrimidine Activity	0	0.97	0.54	0.887	1.485	0.803	-0.04	-0.89	-0.17	0.57	-0.32	0.989905	0.467749	0.913024	0.515479	0.839335	30.94	16.51	24.61	59.62	32.57	112.6
FALSE	High	Master Protein	Q13085	Acetyl-CoA carboxylase 1 OS=Homo sapiens OX=9606 GN=ACACA PE=1 SV=2	0	FALSE	300.293	30	49	207	49	1	2346	265.4	6.37	616.77	49	cell organization and biogenesis;metabolic process;regulation of biological process;response to stimulus;transport	cytoplasm;cytoskeleton;cytosol;mitochondrion	catalytic activity;metal ion binding;nucleotide binding;protein binding	Pf00289, Pf00364, Pf01039, Pf02222, Pf02655, Pf02785, Pf02786, Pf07478, Pf08326, Pf13535, Pf15632	31	ENSG00000278540.4; ENSG00000275176.4	ACACA	17; CHR_HSCHR17_7_CTG4	Propanoate metabolism; Insulin signaling pathway; Pyruvate metabolism; Fatty acid biosynthesis; Glucagon signaling pathway; AMPK signaling pathway; Metabolic pathways; Fatty acid metabolism	Sterol Regulatory Element-Binding Proteins (SREBP) signalling; Corticotropin-releasing hormone signaling pathway; AMP-activated Protein Kinase (AMPK) Signaling; Leptin and adiponectin; Mesodermal Commitment Pathway; VEGFA-VEGFR2 Signaling Pathway; Leptin signaling pathway; Fatty Acid Biosynthesis; Focal Adhesion-PI3K-Akt-mTOR-signaling pathway	0	1.025	0.688	0.968	1.484	1.019	0.04	-0.54	-0.05	0.57	0.03	0.766201	0.670659	0.966521	0.0352551	0.974738	36.46	18.66	40.13	47.47	43.81	107.1
FALSE	High	Master Protein	Q14847	LIM and SH3 domain protein 1 OS=Homo sapiens OX=9606 GN=LASP1 PE=1 SV=2	0	FALSE	81.755	53	11	105	11	1	261	29.7	7.05	240	11	regulation of biological process;transport	cytoplasm;cytoskeleton	metal ion binding;protein binding;transporter activity	Pf00018, Pf00412, Pf00880, Pf07653, Pf14604	3927	ENSG00000002834.17	LASP1	17			0	1.077	0.982	1.365	1.484	1.375	0.11	-0.03	0.45	0.57	0.46	0.390862	0.941119	0.207278	0.0285032	0.132843	58.84	71.89	57.37	75.42	59.34	95
FALSE	High	Master Protein	P16949	Stathmin OS=Homo sapiens OX=9606 GN=STMN1 PE=1 SV=3	0	FALSE	93.917	39	12	128	12	1	149	17.3	5.97	389.5	12	cell differentiation;cell organization and biogenesis;development;regulation of biological process;response to stimulus	cytoplasm;cytoskeleton;cytosol;membrane	protein binding;signal transducer activity	Pf00836, Pf09726	3925	ENSG00000117632.22	STMN1	1	MicroRNAs in cancer; MAPK signaling pathway	Regulation of Microtubule Cytoskeleton; EGF/EGFR Signaling Pathway; Rac1/Pak1/p38/MMP-2 pathway; Retinoblastoma (RB) in Cancer; MAPK Signaling Pathway	0	0.755	0.608	1.242	1.483	0.877	-0.41	-0.72	0.31	0.57	-0.19	0.000437845	0.189794	0.645994	0.0360186	0.882144	38.11	31.67	70.78	84.68	61.63	155.5
FALSE	High	Master Protein	P22681	E3 ubiquitin-protein ligase CBL OS=Homo sapiens OX=9606 GN=CBL PE=1 SV=2	0	FALSE	51.006	23	11	27	11	1	906	99.6	6.54	62.11	11	cell death;cell organization and biogenesis;metabolic process;regulation of biological process;response to stimulus;transport	cytoplasm;cytosol;membrane;nucleus;vacuole	catalytic activity;metal ion binding;protein binding;signal transducer activity	Pf00097, Pf00627, Pf02262, Pf02761, Pf02762, Pf13639, Pf13920, Pf13923, Pf14447, Pf14634, Pf15227	867	ENSG00000110395.6	CBL	11	Endocytosis; T cell receptor signaling pathway; Insulin signaling pathway; Ubiquitin mediated proteolysis; Chronic myeloid leukemia; ErbB signaling pathway; Pathways in cancer; Proteoglycans in cancer; Bacterial invasion of epithelial cells	IL-3 Signaling Pathway; IL-2 Signaling Pathway; T-Cell antigen Receptor (TCR) pathway during Staphylococcus aureus infection; Signaling Pathways in Glioblastoma; Angiopoietin Like Protein 8 Regulatory Pathway; Prolactin Signaling Pathway; Interferon type I signaling pathways; EGF/EGFR Signaling Pathway; Kit receptor signaling pathway; T-Cell antigen Receptor (TCR) Signaling Pathway; B Cell Recept…	0	1.033	0.617	0.775	1.483	0.823	0.05	-0.7	-0.37	0.57	-0.28	0.924888	0.521165	0.525306	0.343586	0.867698	40.89	10.76	24.71	47.95	38.8	115.9
FALSE	Medium	Master Protein	P0CG12	Chromosome transmission fidelity protein 8 homolog isoform 2 OS=Homo sapiens OX=9606 GN=CHTF8 PE=1 SV=1	0.033	FALSE	2.216	2	1	1	1	1	524	51.4	12.41	1.62	1	cell organization and biogenesis	nucleus			54921	ENSG00000168802.12	CHTF8	16		Gastric cancer network 2	0	0.98	0.558	0.963	1.483	0.826	-0.03	-0.84	-0.05	0.57	-0.28	0.991718	0.769032	0.994465	0.919106	0.937759	67.63	25.51	48.9	27.87	58.75	114.6
FALSE	High	Master Protein	P52306	Rap1 GTPase-GDP dissociation stimulator 1 OS=Homo sapiens OX=9606 GN=RAP1GDS1 PE=1 SV=3	0	FALSE	131.014	40	18	91	17	1	607	66.3	5.31	338.16	18	cell organization and biogenesis;cellular homeostasis;regulation of biological process;response to stimulus	cytosol;endoplasmic reticulum;mitochondrion	enzyme regulator activity;protein binding	Pf00514	5910	ENSG00000138698.14	RAP1GDS1	4			1	0.941	0.76	0.986	1.483	0.966	-0.09	-0.4	-0.02	0.57	-0.05	0.968798	0.842055	0.988797	0.171553	0.989349	29.01	29.21	52.13	55.85	41.14	104.6
FALSE	High	Master Protein	Q8NI27	THO complex subunit 2 OS=Homo sapiens OX=9606 GN=THOC2 PE=1 SV=2	0	FALSE	15.578	3	4	15	4	1	1593	182.7	8.44	25.36	4	cell differentiation;cell division;cell organization and biogenesis;metabolic process;regulation of biological process;transport	nucleus	protein binding;RNA binding	Pf11262, Pf11732	57187	ENSG00000125676.19	THOC2	X	Spliceosome; RNA transport		0	0.981	0.582	0.839	1.482	0.807	-0.03	-0.78	-0.25	0.57	-0.31	0.993899	0.546839	0.86875	0.718269	0.840598	52.77	25.7	44.47	76.53	47.71	120.1
FALSE	High	None	P40424	Pre-B-cell leukemia transcription factor 1 OS=Homo sapiens OX=9606 GN=PBX1 PE=1 SV=1	0.002	FALSE	4.997	3	1	1	1	1	430	46.6	7.03	2.8	1	cell differentiation;development;metabolic process;regulation of biological process	cytoplasm;nucleus	DNA binding;protein binding	Pf00046, Pf03792, Pf04091, Pf05920	5087	ENSG00000185630.18	PBX1	1	Transcriptional misregulation in cancer	Mesodermal Commitment Pathway; Preimplantation Embryo; Sudden Infant Death Syndrome (SIDS) Susceptibility Pathways	0	0.924	0.843	1.043	1.482	0.964	-0.11	-0.25	0.06	0.57	-0.05	0.955851	0.999876	0.999922	0.860844	0.979113	17.21	0.23	42.06	37.15	44.74	107.2
FALSE	High	Master Protein	P28065	Proteasome subunit beta type-9 OS=Homo sapiens OX=9606 GN=PSMB9 PE=1 SV=2	0	FALSE	28.011	31	5	16	5	1	219	23.3	5.03	44.18	5	metabolic process;regulation of biological process;response to stimulus;transport	cytoplasm;cytosol;nucleus;proteasome	catalytic activity;protein binding	Pf00227	5698	ENSG00000239836.7; ENSG00000243594.7; ENSG00000243067.7; ENSG00000240065.7; ENSG00000240118.7	PSMB9	6; CHR_HSCHR6_MHC_MANN_CTG1; CHR_HSCHR6_MHC_QBL_CTG1; CHR_HSCHR6_MHC_COX_CTG1; CHR_HSCHR6_MHC_DBB_CTG1	Proteasome	Proteasome Degradation; Type II interferon signaling (IFNG)	0	1.297	2.214	2.994	1.481	3.507	0.37	1.15	1.58	0.57	1.81	0.307077	0.00196613	1.10136e-07	0.242022	5.56475e-08	49.74	46.32	38.32	55.78	44.84	54.2
FALSE	High	Master Protein	Q9NPL8	Complex I assembly factor TIMMDC1, mitochondrial OS=Homo sapiens OX=9606 GN=TIMMDC1 PE=1 SV=2	0	FALSE	12.587	14	3	12	3	1	285	32.2	8.5	31.09	3	cell organization and biogenesis	membrane;mitochondrion;nucleus	protein binding	Pf02466	51300	ENSG00000113845.9	TIMMDC1	3			0	1.149	0.734	0.946	1.48	1.048	0.2	-0.45	-0.08	0.57	0.07	0.726065	0.846874	0.980485	0.496799	0.987913	47.21	21.39	48.06	28.23	42.76	98
FALSE	High	Master Protein	Q9P0S2	Cytochrome c oxidase assembly protein COX16 homolog, mitochondrial OS=Homo sapiens OX=9606 GN=COX16 PE=1 SV=1	0.001	FALSE	5.858	22	2	2	2	1	106	12.3	9.5	3.51	2		membrane;mitochondrion		Pf14138	51241	ENSG00000133983.14	COX16	14			0	0.724	0.792	1.336	1.48	1.96	-0.46	-0.34	0.42	0.57	0.97	0.496191	0.962137	0.90479	0.780799	0.330535	34.59	41.27	56.19	31.53	42.3	114.9
FALSE	Low	Master Protein	Q9UBU7	Protein DBF4 homolog A OS=Homo sapiens OX=9606 GN=DBF4 PE=1 SV=1	0.105	FALSE	1.324	2	1	1	1	1	674	76.8	7.9	0	1	metabolic process;regulation of biological process	nucleus	enzyme regulator activity;metal ion binding;protein binding	Pf07535	10926	ENSG00000006634.7	DBF4	7	Cell cycle	DNA Replication; Cell Cycle	0	0.884	0.568	0.753	1.479	0.631	-0.18	-0.82	-0.41	0.56	-0.66	0.931016	0.777075	0.875111	0.901471	0.725615	19.5	11.89	27.84	55.61	10.68	138.2
[truncated: 6,013 more rows]
[truncated: 68 more columns]
