# Supplementary material for: Mutant KRAS-Associated Proteome Is Mainly Controlled by Exogenous Factors
Source: Cells. 2022 Jun 21;11(13):1988. doi: 10.3390/cells11131988 (PMC9265670; doi:10.3390/cells11131988)
Supplement: Supplementary file 1 [file cells-11-01988-s001.zip › Supplementary file S2_LS174T_all_identified_proteins.xlsx]

## Sheet: Proteins
Checked	Protein FDR Confidence: Combined	Master	Accession	Description	Exp. q-value: Combined	Contaminant	Sum PEP Score	Coverage [%]	# Peptides	# PSMs	# Unique Peptides	# Protein Groups	# AAs	MW [kDa]	calc. pI	Score Sequest HT: Sequest HT	# Peptides (by Search Engine): Sequest HT	Biological Process	Cellular Component	Molecular Function	Pfam IDs	Entrez Gene ID	Ensembl Gene ID	Gene Symbol	Chromosome	KEGG Pathways	WikiPathways	# Razor Peptides	Abundance Ratio: (6_LS174T_siCTRL_FibCM) / (5_LS174T_siCTRL_ctrlCM)	Abundance Ratio: (7_LS174T_siKRAS_ctrlCM) / (5_LS174T_siCTRL_ctrlCM)	Abundance Ratio: (8_LS174T_siKRAS_FibCM) / (6_LS174T_siCTRL_FibCM)	Abundance Ratio: (8_LS174T_siKRAS_FibCM) / (7_LS174T_siKRAS_ctrlCM)	Abundance Ratio: (8_LS174T_siKRAS_FibCM) / (5_LS174T_siCTRL_ctrlCM)	Abundance Ratio Adj. P-Value: (6_LS174T_siCTRL_FibCM) / (5_LS174T_siCTRL_ctrlCM)	Abundance Ratio Adj. P-Value: (7_LS174T_siKRAS_ctrlCM) / (5_LS174T_siCTRL_ctrlCM)	Abundance Ratio Adj. P-Value: (8_LS174T_siKRAS_FibCM) / (6_LS174T_siCTRL_FibCM)	Abundance Ratio Adj. P-Value: (8_LS174T_siKRAS_FibCM) / (7_LS174T_siKRAS_ctrlCM)	Abundance Ratio Adj. P-Value: (8_LS174T_siKRAS_FibCM) / (5_LS174T_siCTRL_ctrlCM)	Abundance Ratio Variability [%]: (6_LS174T_siCTRL_FibCM) / (5_LS174T_siCTRL_ctrlCM)	Abundance Ratio Variability [%]: (7_LS174T_siKRAS_ctrlCM) / (5_LS174T_siCTRL_ctrlCM)	Abundance Ratio Variability [%]: (8_LS174T_siKRAS_FibCM) / (6_LS174T_siCTRL_FibCM)	Abundance Ratio Variability [%]: (8_LS174T_siKRAS_FibCM) / (7_LS174T_siKRAS_ctrlCM)	Abundance Ratio Variability [%]: (8_LS174T_siKRAS_FibCM) / (5_LS174T_siCTRL_ctrlCM)	Abundances (Grouped): 5_LS174T_siCTRL_ctrlCM	Abundances (Grouped): 6_LS174T_siCTRL_FibCM	Abundances (Grouped): 7_LS174T_siKRAS_ctrlCM	Abundances (Grouped): 8_LS174T_siKRAS_FibCM	Abundances (Grouped) CV [%]: 5_LS174T_siCTRL_ctrlCM	Abundances (Grouped) CV [%]: 6_LS174T_siCTRL_FibCM
FALSE	High	Master Protein	Q96SK2	Transmembrane protein 209 OS=Homo sapiens OX=9606 GN=TMEM209 PE=1 SV=2	0.002	FALSE	4.899	4	1	3	1	1	561	62.9	8.63	6.73	1		membrane		Pf09786	84928	ENSG00000146842.16	TMEM209	7			0			100	100	100			4.24865e-16	3.54689e-16	3.9087e-16									400
FALSE	High	Master Protein	Q7Z3B1	Neuronal growth regulator 1 OS=Homo sapiens OX=9606 GN=NEGR1 PE=1 SV=3	0	FALSE	8.139	12	2	2	2	1	354	38.7	6.21	2.72	2	metabolic process;regulation of biological process;response to stimulus	extracellular;membrane	protein binding	Pf00047, Pf07679, Pf13895, Pf13927	257194	ENSG00000172260.14	NEGR1	1	Cell adhesion molecules (CAMs)		0	1.115	0.01	0.88	100	0.977	0.842958	3.59486e-16	0.762811	3.54689e-16	0.961714	54.66		38.93		12.37	130.8	145.9		123.3	22.63	43.36
FALSE	Low	Master Protein	Q8IY47	Kelch repeat and BTB domain-containing protein 2 OS=Homo sapiens OX=9606 GN=KBTBD2 PE=1 SV=2	0.072	FALSE	1.585	1	1	1	1	1	623	71.3	5.62	0	1	metabolic process		catalytic activity;protein binding	Pf00651, Pf01344, Pf07646, Pf07707, Pf13964	25948	ENSG00000170852.10	KBTBD2	7			0	1.139	0.01	0.849	100	0.943	0.867631	3.59486e-16	0.864528	3.54689e-16	0.985733	19.32		40.9		46.96	129.5	147.6		122.9	12.86	20.11
FALSE	Medium	Master Protein	P82914	28S ribosomal protein S15, mitochondrial OS=Homo sapiens OX=9606 GN=MRPS15 PE=1 SV=1	0.029	FALSE	2.312	9	2	5	2	1	257	29.8	10.48	6.04	2	cell organization and biogenesis;metabolic process	membrane;mitochondrion;nucleus;ribosome	RNA binding;structural molecule activity	Pf00312	64960	ENSG00000116898.11	MRPS15	1	Ribosome		0	0.308	0.01	0.726	100	0.501	1.81552e-05	3.59486e-16	0.622213	3.54689e-16	0.0271698	7.92		17.76		12.72	250.2	66.5		83.2	95.92	55.84
FALSE	Low	Master Protein	O94806	Serine/threonine-protein kinase D3 OS=Homo sapiens OX=9606 GN=PRKD3 PE=1 SV=1	0.156	FALSE	1.027	4	1	1	1	1	890	100.4	6.87	0	1	metabolic process;regulation of biological process;response to stimulus	cytoplasm;cytosol;membrane	catalytic activity;metal ion binding;nucleotide binding;protein binding	Pf00069, Pf00130, Pf00169, Pf07714, Pf14531	23683	ENSG00000115825.9	PRKD3	2	Rap1 signaling pathway; Aldosterone synthesis and secretion	miRs in Muscle Cell Differentiation; G Protein Signaling Pathways	0	0.01	0.01	100	100	0.474	4.49643e-16	3.59486e-16	4.24865e-16	3.54689e-16	0.000556961					0	271.4			128.6
FALSE	High	Master Protein	Q9UHQ1	Nuclear prelamin A recognition factor OS=Homo sapiens OX=9606 GN=NARF PE=1 SV=1	0.001	FALSE	6.502	3	1	1	1	1	456	51.1	7.08	2.96	1	metabolic process	nucleus;organelle lumen	catalytic activity;protein binding	Pf02256, Pf02906	26502	ENSG00000141562.17	NARF	17			0	1.218	0.01	0.936	100	1.14	0.823401	3.59486e-16	0.917634	3.54689e-16	0.963048	8.21		12.88		15.52	119.1	145.1		135.8		7.82
FALSE	High	Master Protein	Q9H0E3	Histone deacetylase complex subunit SAP130 OS=Homo sapiens OX=9606 GN=SAP130 PE=1 SV=1	0.002	FALSE	4.875	2	1	1	1	1	1048	110.3	9.83	0	1	metabolic process;regulation of biological process	nucleus			79595	ENSG00000136715.17	SAP130	2			0	0.845	0.01	1.863	100	1.575	0.941052	3.59486e-16	0.261654	3.54689e-16	0.441323	0		41.82		41.82	117	98.8		184.2
FALSE	High	Master Protein	Q8TEW0	Partitioning defective 3 homolog OS=Homo sapiens OX=9606 GN=PARD3 PE=1 SV=2	0.006	FALSE	3.661	2	1	1	1	1	1356	151.3	7.68	2.29	1	cell differentiation;cell division;cell organization and biogenesis;regulation of biological process;response to stimulus;transport	cytoplasm;cytoskeleton;cytosol;membrane	protein binding	Pf00595, Pf12053, Pf13180	56288	ENSG00000148498.15	PARD3	10	Endocytosis; Tight junction; Hippo signaling pathway; Rap1 signaling pathway; Neuroactive ligand-receptor interaction; Adherens junction; Chemokine signaling pathway	Chemokine signaling pathway	0			100	100	100			4.24865e-16	3.54689e-16	3.9087e-16									400
FALSE	High	Master Protein	Q7Z7A3	Cytoplasmic tRNA 2-thiolation protein 1 OS=Homo sapiens OX=9606 GN=CTU1 PE=1 SV=1	0	FALSE	8.87	11	2	2	2	1	348	36.4	9.2	2.61	2	metabolic process	cytoplasm;cytosol;mitochondrion	catalytic activity;protein binding;RNA binding	Pf01171	90353	ENSG00000142544.6	CTU1	19	Sulfur relay system		0	1.775	0.01	1.824	100	3.239	0.114715	3.59486e-16	0.516834	3.54689e-16	0.00245138	81.69		177.88		127.38	66.5	118.1		215.4	92.16	108.63
FALSE	High	Master Protein	P09486	SPARC OS=Homo sapiens OX=9606 GN=SPARC PE=1 SV=1	0	FALSE	13.202	10	2	3	2	1	303	34.6	4.84	10.24	2	cell organization and biogenesis;regulation of biological process;response to stimulus;transport	cell surface;cytoplasm;extracellular;membrane;mitochondrion;nucleus;organelle lumen	metal ion binding;protein binding	Pf00050, Pf07648, Pf09289, Pf10591	6678	ENSG00000113140.10	SPARC	5		Senescence and Autophagy in Cancer; miR-509-3p alteration of YAP1/ECM axis	0	100		3.821	100	100	4.49643e-16		2.79243e-14	3.54689e-16	3.9087e-16			0				59		341
FALSE	High	Master Protein	Q96S94	Cyclin-L2 OS=Homo sapiens OX=9606 GN=CCNL2 PE=1 SV=1	0.003	FALSE	4.199	4	1	1	1	1	520	58.1	10.26	2.17	1	metabolic process;regulation of biological process	nucleus	enzyme regulator activity;protein binding	Pf00134, Pf02984	81669	ENSG00000221978.11	CCNL2	1			0	0.678	0.01	1.72	100	1.166	0.594429	3.59486e-16	0.32153	3.54689e-16	0.961714	19.29		41.46		31.86	140.7	95.3		164	38.54
FALSE	Medium	Master Protein	Q96S97	Myeloid-associated differentiation marker OS=Homo sapiens OX=9606 GN=MYADM PE=1 SV=2	0.028	FALSE	2.353	3	1	2	1	1	322	35.3	8.15	4.16	1	cell organization and biogenesis;regulation of biological process	cytoskeleton;membrane		Pf01284	91663	ENSG00000179820.15	MYADM	19			0	1.06	0.01	0.798	100	0.925	0.950092	3.59486e-16	0.694688	3.54689e-16	0.961714	37.48		42.6		26.34	134.9	140.4		124.8	21.06	72.15
FALSE	High	Master Protein	Q15032	R3H domain-containing protein 1 OS=Homo sapiens OX=9606 GN=R3HDM1 PE=1 SV=3	0.003	FALSE	4.127	1	1	1	1	1	1099	120.6	8.75	0	1			RNA binding	Pf01424, Pf09770	23518	ENSG00000048991.16	R3HDM1	2			0	0.339	0.01	3.408	100	1.156	0.000126763	3.59486e-16	0.000671806	3.54689e-16	0.961714	3.79		29.43		27.05	160.3	54.4		185.3	30.68
FALSE	High	Master Protein	Q6UW78	Ubiquinol-cytochrome-c reductase complex assembly factor 3 OS=Homo sapiens OX=9606 GN=UQCC3 PE=1 SV=2	0	FALSE	9.4	38	2	2	2	1	93	10.1	9.41	5.18	2	cell organization and biogenesis;metabolic process	membrane;mitochondrion		Pf15141	790955	ENSG00000204922.4	C11orf83; UQCC3	11			0	0.563	0.01	1.387	100	0.781	0.213235	3.59486e-16	0.864938	3.54689e-16	0.798974	0		0		0	170.7	96.1		133.2
FALSE	Low	Master Protein	P11161	E3 SUMO-protein ligase EGR2 OS=Homo sapiens OX=9606 GN=EGR2 PE=1 SV=3	0.096	FALSE	1.374	10	1	5	1	1	476	50.3	8.72	0	1	cell differentiation;cellular component movement;metabolic process;regulation of biological process;response to stimulus;transport	cytoplasm;nucleus	catalytic activity;DNA binding;metal ion binding;protein binding	Pf00096, Pf11928, Pf13465	1959	ENSG00000122877.15	EGR2	10	Viral carcinogenesis; Hepatitis B; HTLV-I infection	Brain-Derived Neurotrophic Factor (BDNF) signaling pathway; White fat cell differentiation; Adipogenesis	0			100	100	100			4.24865e-16	3.54689e-16	3.9087e-16									400
TRUE	High	Master Protein	Q5C9Z4	Nucleolar MIF4G domain-containing protein 1 OS=Homo sapiens OX=9606 GN=NOM1 PE=1 SV=1	0	FALSE	8.036	3	1	1	1	1	860	96.2	8.1	3.33	1	cell differentiation	nucleus	protein binding;RNA binding	Pf02847, Pf02854	64434	ENSG00000146909.7	NOM1	7			0	100		0.868	100	100	4.49643e-16		0.799675	3.54689e-16	3.9087e-16			0				214.2		185.8
FALSE	High	Master Protein	Q9H6R4	Nucleolar protein 6 OS=Homo sapiens OX=9606 GN=NOL6 PE=1 SV=2	0	FALSE	9.872	3	2	2	2	1	1146	127.5	7.64	5.95	2	metabolic process;transport	chromosome;mitochondrion;nucleus	protein binding;RNA binding	Pf03813	65083	ENSG00000165271.16	NOL6	9	Ribosome biogenesis in eukaryotes		0	100		0.927	100	100	4.49643e-16		0.935102	3.54689e-16	3.9087e-16			55.05				207.6		192.4		15.38
FALSE	Medium	None	P0C866	Putative uncharacterized protein encoded by LINC00869 OS=Homo sapiens OX=9606 GN=LINC00869 PE=5 SV=1	0.012	FALSE	2.971	4	1	3	1	1	280	30.8	5.85	4.48	1				Pf14648	57234		FAM91A2; LINC00869	1			0	0.842	0.01	1.282	100	1.077	0.939955	3.59486e-16	0.900553	3.54689e-16	0.992073	30.85		22.08		42.59	137	115.4		147.6	43.9	20.87
FALSE	Medium	Master Protein	P33552	Cyclin-dependent kinases regulatory subunit 2 OS=Homo sapiens OX=9606 GN=CKS2 PE=1 SV=1	0.025	FALSE	2.48	32	1	1	1	1	79	9.9	8.46	0	1	cell division;cell organization and biogenesis;cell proliferation;regulation of biological process		enzyme regulator activity;protein binding	Pf01111	1164	ENSG00000123975.4	CKS2	9	Pathways in cancer; Small cell lung cancer		0	0.01	0.01	100	100	0.691	4.49643e-16	3.59486e-16	4.24865e-16	3.54689e-16	0.665398					0	236.5			163.5
TRUE	High	Master Protein	Q8N465	D-2-hydroxyglutarate dehydrogenase, mitochondrial OS=Homo sapiens OX=9606 GN=D2HGDH PE=1 SV=3	0.001	FALSE	6.949	4	1	2	1	1	521	56.4	7.99	6.25	1	metabolic process;response to stimulus	mitochondrion;organelle lumen	catalytic activity;nucleotide binding	Pf01565, Pf02913	728294	ENSG00000180902.17	D2HGDH	2			0	100		0.509	100	100	4.49643e-16		0.000670475	3.54689e-16	3.9087e-16			7.79				265.1		134.9
FALSE	High	Master Protein	Q86WR7	Proline and serine-rich protein 2 OS=Homo sapiens OX=9606 GN=PROSER2 PE=1 SV=2	0.002	FALSE	4.361	8	1	4	1	1	435	45.8	7.2	3.35	1			protein binding	Pf15385	254427	ENSG00000148426.12	C10orf47; PROSER2	10			0	0.71	0.01	0.64	100	0.454	0.724452	3.59486e-16	0.334834	3.54689e-16	0.0209288	0		0		0	184.8	131.2		83.9
FALSE	High	Master Protein	Q2KHR3	Glutamine and serine-rich protein 1 OS=Homo sapiens OX=9606 GN=QSER1 PE=1 SV=3	0	FALSE	8.688	1	2	2	2	1	1735	189.9	7.08	3.74	2				Pf13926	79832	ENSG00000060749.14	QSER1	11			0	38.357	0.01	0.065	100	2.495	4.49643e-16	3.59486e-16	4.24865e-16	3.54689e-16	0.0466429	13.51		0.15		32.22	9.6	366.6		23.8	12.83
FALSE	Low	Master Protein	O15169	Axin-1 OS=Homo sapiens OX=9606 GN=AXIN1 PE=1 SV=2	0.099	FALSE	1.357	1	1	1	1	1	862	95.6	6.96	1.85	1	cell death;cell organization and biogenesis;development;metabolic process;regulation of biological process;response to stimulus	cytoplasm;cytosol;membrane;nucleus	enzyme regulator activity;protein binding;signal transducer activity;structural molecule activity	Pf00615, Pf00778, Pf08833	8312	ENSG00000103126.14	AXIN1	16	Hippo signaling pathway; Endometrial cancer; Breast cancer; Colorectal cancer; Pathways in cancer; Wnt signaling pathway; Basal cell carcinoma; Signaling pathways regulating pluripotency of stem cells	DNA Damage Response (only ATM dependent); Wnt Signaling Pathway and Pluripotency; Wnt Signaling Pathway Netpath; ESC Pluripotency Pathways; Regulation of Wnt/B-catenin Signaling by Small Molecule Compounds; Extracellular vesicle-mediated signaling in recipient cells; Neural Crest Differentiation; Wnt Signaling Pathway; TGF-beta Signaling Pathway; Association Between Physico-Chemical Features and …	0	0.779	0.01	0.186	100	0.145	0.849598	3.59486e-16	6.2421e-10	3.54689e-16	3.9087e-16	40.4		1.57		0.34	207.9	161.9		30.2	15.29	83.76
FALSE	High	Master Protein	Q969J3	BLOC-1-related complex subunit 5 OS=Homo sapiens OX=9606 GN=BORCS5 PE=1 SV=1	0.002	FALSE	4.5	8	1	2	1	1	196	22.2	6.35	3.87	1	cellular component movement;transport	membrane;vacuole	protein binding	Pf10158	118426	ENSG00000280689.2; ENSG00000165714.10	LOH12CR1; BORCS5	12; CHR_HG1362_PATCH			0	0.884	0.01	0.938	100	1.176	0.976316	3.59486e-16	0.94265	3.54689e-16	0.961714	68.39		118.56		47.98	130.7	115.5		153.8	57.57	160.4
FALSE	High	Master Protein	Q14161	ARF GTPase-activating protein GIT2 OS=Homo sapiens OX=9606 GN=GIT2 PE=1 SV=2	0	FALSE	16.31	5	3	12	1	1	759	84.5	7.23	32.87	3	regulation of biological process		enzyme regulator activity;metal ion binding;protein binding	Pf00023, Pf01412, Pf07558, Pf08518, Pf12205, Pf12796, Pf13637, Pf13857	9815	ENSG00000139436.20	GIT2	12	Endocytosis	Integrin-mediated Cell Adhesion	0	0.298	0.01	1.632	100	0.486	0.000214473	3.59486e-16	0.702998	3.54689e-16	0.134455	0		0		0	224.2	66.8		109
FALSE	High	Master Protein	Q96CX6	Leucine-rich repeat-containing protein 58 OS=Homo sapiens OX=9606 GN=LRRC58 PE=1 SV=2	0	FALSE	25.178	16	3	5	3	1	371	40.6	6.84	16.96	3			protein binding	Pf12799, Pf13855	116064	ENSG00000163428.3	LRRC58	3			0	2.562	0.01	1.213	100	3.109	0.000466187	3.59486e-16	0.908499	3.54689e-16	3.39058e-06	0		34.02		0	66.8	111.1		222.1		111.52
TRUE	High	Master Protein	Q9H0L4	Cleavage stimulation factor subunit 2 tau variant OS=Homo sapiens OX=9606 GN=CSTF2T PE=1 SV=1	0	FALSE	44.549	21	7	18	1	1	616	64.4	7.25	66.66	7	metabolic process	nucleus	protein binding;RNA binding	Pf00076, Pf13893, Pf14259, Pf14304, Pf14327	23283	ENSG00000177613.8	CSTF2T	10	mRNA surveillance pathway	mRNA Processing	0	100		1.234	100	100	4.49643e-16		0.968938	3.54689e-16	3.9087e-16			0				179.1		220.9
FALSE	High	Master Protein	P33947	ER lumen protein-retaining receptor 2 OS=Homo sapiens OX=9606 GN=KDELR2 PE=1 SV=1	0.002	FALSE	4.584	8	1	1	1	1	212	24.4	8.72	2.6	1	transport	endoplasmic reticulum;Golgi;membrane		Pf00810	11014	ENSG00000136240.9	KDELR2	7	Vibrio cholerae infection		0	0.204	0.01	1.345	100	0.275	1.36651e-07	3.59486e-16	0.920526	3.54689e-16	0.000333051	0		0		0	270.4	55.2		74.3
TRUE	High	Master Protein	Q08117	Amino-terminal enhancer of split OS=Homo sapiens OX=9606 GN=AES PE=1 SV=4	0.002	FALSE	4.838	8	1	1	1	1	197	22	6.37	3.24	1	cell communication;development;metabolic process;regulation of biological process;response to stimulus	nucleus	protein binding	Pf03920	166	ENSG00000104964.14	AES	19		Ectoderm Differentiation; Androgen receptor signaling pathway	0	2.122	0.01	0.363	100	0.769	0.00361867	3.59486e-16	1.18189e-05	3.54689e-16	0.742046	0		0		0	102.8	218.1		79.1
FALSE	High	Master Protein	Q99704	Docking protein 1 OS=Homo sapiens OX=9606 GN=DOK1 PE=1 SV=1	0	FALSE	11.236	4	1	1	1	1	481	52.4	6.47	4.92	1	cellular component movement;regulation of biological process;response to stimulus	cytoplasm;cytosol;nucleus	protein binding;signal transducer activity	Pf00169, Pf02174	1796	ENSG00000115325.13	DOK1	2	Measles	VEGFA-VEGFR2 Signaling Pathway; Kit receptor signaling pathway	0	1.017	0.01	1.55	100	1.576	0.976075	3.59486e-16	0.63911	3.54689e-16	0.473763	81.28		0		81.28	111.3	113.2		175.5	81.34
FALSE	High	Master Protein	O75925	E3 SUMO-protein ligase PIAS1 OS=Homo sapiens OX=9606 GN=PIAS1 PE=1 SV=2	0.002	FALSE	4.543	2	1	2	1	1	651	71.8	7.3	0	1	cell differentiation;cell organization and biogenesis;metabolic process;regulation of biological process;response to stimulus	nucleus	catalytic activity;DNA binding;metal ion binding;protein binding	Pf02891, Pf14324	8554	ENSG00000033800.13	PIAS1	15	Ubiquitin mediated proteolysis; Jak-STAT signaling pathway; Hepatitis C	Mesodermal Commitment Pathway; Interferon type I signaling pathways; Androgen receptor signaling pathway; Interleukin-11 Signaling Pathway; TGF-beta Signaling Pathway	0	0.742	0.01	2.08	100	1.542	0.823401	3.59486e-16	0.141836	3.54689e-16	0.594449	21.18		52		0	121.8	90.3		187.9		38.12
FALSE	Medium	None	Q12866	Tyrosine-protein kinase Mer OS=Homo sapiens OX=9606 GN=MERTK PE=1 SV=2	0.037	FALSE	2.118	1	1	1	1	1	999	110.2	5.8	0	1	cell communication;cell differentiation;cell organization and biogenesis;cellular component movement;metabolic process;regulation of biological process;response to stimulus;transport	cytoplasm;membrane	catalytic activity;nucleotide binding;protein binding;receptor activity;signal transducer activity	Pf00041, Pf00047, Pf00069, Pf07679, Pf07714, Pf13895, Pf13927	10461	ENSG00000153208.16	MERTK	2			0	0.01	0.01	100	100	1.341	4.49643e-16	3.59486e-16	4.24865e-16	3.54689e-16	0.839755					30.4	170.9			229.1	23.54
FALSE	High	Master Protein	P15923	Transcription factor E2-alpha OS=Homo sapiens OX=9606 GN=TCF3 PE=1 SV=1	0	FALSE	11.686	8	2	2	2	1	654	67.6	6.47	5.46	2	cell differentiation;metabolic process;regulation of biological process	cytoplasm;nucleus	DNA binding;protein binding	Pf00010	6929	ENSG00000071564.14	TCF3	19	HTLV-I infection; Transcriptional misregulation in cancer; Signaling pathways regulating pluripotency of stem cells	Wnt Signaling Pathway Netpath; Wnt/beta-catenin Signaling Pathway in Leukemia; Sudden Infant Death Syndrome (SIDS) Susceptibility Pathways; Ectoderm Differentiation	0	0.991	0.01	0.881	100	0.873	0.988473	3.59486e-16	0.886164	3.54689e-16	0.935752	0		0		0	139.7	138.4		121.9
FALSE	High	Master Protein	Q9BVA0	Katanin p80 WD40 repeat-containing subunit B1 OS=Homo sapiens OX=9606 GN=KATNB1 PE=1 SV=1	0	FALSE	8.83	4	2	2	2	1	655	72.3	7.56	2.99	2	cell division;regulation of biological process;transport	cytoplasm;cytoskeleton;cytosol;membrane;nucleus	catalytic activity;protein binding	Pf00400, Pf08662, Pf08801, Pf13925	10300	ENSG00000140854.12	KATNB1	16			0	1.159	0.01	0.781	100	0.905	0.840162	3.59486e-16	0.595392	3.54689e-16	0.948374	41		21.48		34.68	130.5	151.3		118.2	17.63	42.3
FALSE	Low	Master Protein	Q9H0E9	Bromodomain-containing protein 8 OS=Homo sapiens OX=9606 GN=BRD8 PE=1 SV=2	0.128	FALSE	1.159	1	1	1	1	1	1235	135.3	4.6	0	1	cell organization and biogenesis;metabolic process;regulation of biological process;response to stimulus	mitochondrion;nucleus	protein binding;receptor activity;signal transducer activity	Pf00439	10902	ENSG00000112983.17	BRD8	5			0	0.87	0.01	0.534	100	0.465	0.962083	3.59486e-16	0.119624	3.54689e-16	0.048425	49.41		7.78		16.92	171.3	149.1		79.6	66.08	25.58
FALSE	Medium	Master Protein Candidate	Q9BVR0	Putative HERC2-like protein 3 OS=Homo sapiens OX=9606 GN=HERC2P3 PE=5 SV=2	0.048	FALSE	1.981	1	1	1	1	1	1158	128.9	6.89	2.57	1	metabolic process		catalytic activity;metal ion binding	Pf06701	283755		HERC2P3	15			0	1.005	0.01	1.149	100	1.155	0.976252	3.59486e-16	0.971175	3.54689e-16	0.948374	20.34		17.8		19.8	126.6	127.2		146.2		19.22
FALSE	Medium	Master Protein	O75808	Calpain-15 OS=Homo sapiens OX=9606 GN=CAPN15 PE=1 SV=1	0.037	FALSE	2.126	1	1	2	1	1	1086	117.2	6.71	0	1	metabolic process;regulation of biological process	cytoplasm	catalytic activity;metal ion binding	Pf00641, Pf00648	6650	ENSG00000103326.11	CAPN15; SOLH	16			0	1.783	0.01	0.604	100	1.076	0.056375	3.59486e-16	0.275381	3.54689e-16	0.992073	84.45		41.55		45.26	103.7	184.8		111.5	41.29	86.24
FALSE	High	Master Protein Candidate	Q9GZM3	DNA-directed RNA polymerase II subunit RPB11-b1 OS=Homo sapiens OX=9606 GN=POLR2J2 PE=1 SV=2	0.001	FALSE	7.18	15	1	1	1	1	115	13.1	6.77	3.09	1	metabolic process	nucleus	catalytic activity;DNA binding;protein binding	Pf13656	246721; 548644	ENSG00000267645.5; ENSG00000228049.7	POLR2J2; POLR2J3	7	Epstein-Barr virus infection; Huntington's disease; Purine metabolism; RNA polymerase; Metabolic pathways; Pyrimidine metabolism		0	100		22.887	100	100	4.49643e-16		4.24865e-16	3.54689e-16	3.9087e-16			0				16.7		383.3
FALSE	High	Master Protein	Q5UIP0	Telomere-associated protein RIF1 OS=Homo sapiens OX=9606 GN=RIF1 PE=1 SV=2	0	FALSE	8.983	1	1	2	1	1	2472	274.3	5.52	6.64	1	cell organization and biogenesis;metabolic process;regulation of biological process;response to stimulus	chromosome;cytoplasm;cytoskeleton;membrane;nucleus	protein binding	Pf12231	55183	ENSG00000080345.17	RIF1	2	Signaling pathways regulating pluripotency of stem cells	ATM Signaling Network in Development and Disease	0	0.78	0.01	1.54	100	1.202	0.829887	3.59486e-16	0.45975	3.54689e-16	0.869139	27.19		44.64		0	134.1	104.7		161.2		40.77
FALSE	High	Master Protein	Q99807	5-demethoxyubiquinone hydroxylase, mitochondrial OS=Homo sapiens OX=9606 GN=COQ7 PE=1 SV=3	0	FALSE	12.779	17	3	4	3	1	217	24.3	8.59	8.9	3	metabolic process;regulation of biological process	membrane;mitochondrion;nucleus	catalytic activity;metal ion binding;protein binding	Pf03232, Pf11867	10229	ENSG00000167186.10	COQ7	16	Ubiquinone and other terpenoid-quinone biosynthesis; Metabolic pathways		0	0.721	0.01	1.081	100	0.779	0.722482	3.59486e-16	0.999979	3.54689e-16	0.72056	29.19		44.56		25.38	233.1	80.2		86.7	113.69
FALSE	High	Master Protein	P08253	72 kDa type IV collagenase OS=Homo sapiens OX=9606 GN=MMP2 PE=1 SV=2	0	FALSE	16.092	5	2	3	2	1	660	73.8	5.47	9.26	2	cell differentiation;cell organization and biogenesis;metabolic process;regulation of biological process;response to stimulus	cytoplasm;extracellular;membrane;mitochondrion;nucleus	catalytic activity;metal ion binding;protein binding	Pf00040, Pf00045, Pf00413, Pf01471	4313	ENSG00000087245.12	MMP2	16	Pathways in cancer; AGE-RAGE signaling pathway in diabetic complications; Proteoglycans in cancer; Leukocyte transendothelial migration; Bladder cancer; Endocrine resistance; GnRH signaling pathway; Estrogen signaling pathway	Lung fibrosis; Photodynamic therapy-induced NF-kB survival signaling; Matrix Metalloproteinases; VEGFA-VEGFR2 Signaling Pathway; AGE/RAGE pathway	0	100		0.57	100	100	4.49643e-16		0.0377104	3.54689e-16	3.9087e-16			19.02				254.7		145.3
FALSE	Medium	None	Q6S5L8	SHC-transforming protein 4 OS=Homo sapiens OX=9606 GN=SHC4 PE=1 SV=1	0.048	FALSE	1.96	2	1	1	1	1	630	68.7	7.84	2.04	1	cell death;cell differentiation;regulation of biological process;response to stimulus	membrane	protein binding	Pf00017, Pf00640	399694	ENSG00000185634.11	SHC4	15	Insulin signaling pathway; Prolactin signaling pathway; MicroRNAs in cancer; Phospholipase D signaling pathway; Chronic myeloid leukemia; Neurotrophin signaling pathway; Breast cancer; Natural killer cell mediated cytotoxicity; ErbB signaling pathway; Glioma; EGFR tyrosine kinase inhibitor resistance; Focal adhesion; Bacterial invasion of epithelial cells; Alcoholism; Ras signaling pathway; Endoc…	Brain-Derived Neurotrophic Factor (BDNF) signaling pathway; Chemokine signaling pathway	0	1.109	0.01	1.017	100	1.128	0.914844	3.59486e-16	0.991745	3.54689e-16	0.968988	37.27		44.9		50.22	123.6	137		139.4	45.37	40.99
TRUE	Medium	Master Protein	P33981	Dual specificity protein kinase TTK OS=Homo sapiens OX=9606 GN=TTK PE=1 SV=2	0.014	FALSE	2.892	4	1	1	1	1	857	97	8.16	0	1	cell organization and biogenesis;metabolic process;regulation of biological process	chromosome;cytoplasm;membrane	catalytic activity;nucleotide binding;protein binding	Pf00069, Pf07714, Pf14531	7272	ENSG00000112742.9	TTK	6	Cell cycle	Retinoblastoma (RB) in Cancer	0	100		1.414	100	100	4.49643e-16		0.886164	3.54689e-16	3.9087e-16			35.73				165.7		234.3		33.14
TRUE	Low	Master Protein	Q9H6N6	Putative uncharacterized protein MYH16 OS=Homo sapiens OX=9606 GN=MYH16 PE=1 SV=2	0.126	FALSE	1.17	1	1	1	1	1	1097	128.2	5.49	0	1	cell organization and biogenesis;metabolic process		catalytic activity;motor activity	Pf01576, Pf04111, Pf04582, Pf05483, Pf09726	84176		MYH16	7			0	40.908	0.01	0.025	100	1.026	4.49643e-16	3.59486e-16	4.24865e-16	3.54689e-16	0.997101	63.55		0.01		63.55	9.3	381.1		9.6	72.72
FALSE	High	Master Protein Candidate	O75928	E3 SUMO-protein ligase PIAS2 OS=Homo sapiens OX=9606 GN=PIAS2 PE=1 SV=3	0.002	FALSE	4.543	2	1	2	1	1	621	68.2	7.52	0	1	metabolic process;regulation of biological process;response to stimulus	nucleus	catalytic activity;DNA binding;metal ion binding;protein binding	Pf02891, Pf14324	9063	ENSG00000078043.15	PIAS2	18	Ubiquitin mediated proteolysis; Pathways in cancer; Jak-STAT signaling pathway; Small cell lung cancer	TGF-beta Signaling Pathway; Androgen receptor signaling pathway	0	0.742	0.01	2.08	100	1.542	0.823401	3.59486e-16	0.141836	3.54689e-16	0.594449	21.18		52		0	121.8	90.3		187.9		38.12
FALSE	High	Master Protein	Q9NUM4	Transmembrane protein 106B OS=Homo sapiens OX=9606 GN=TMEM106B PE=1 SV=2	0.001	FALSE	6.767	11	2	2	2	1	274	31.1	6.99	4.76	2	cell organization and biogenesis;regulation of biological process;transport	endosome;membrane;vacuole	protein binding	Pf07092	54664	ENSG00000106460.18	TMEM106B	7			0	1.127	0.01	0.651	100	0.753	0.902251	3.59486e-16	0.303686	3.54689e-16	0.712986	35.41		12.55		13.93	136.4	159.7		104	99.13	31.68
TRUE	High	Master Protein	Q9C0K1	Zinc transporter ZIP8 OS=Homo sapiens OX=9606 GN=SLC39A8 PE=2 SV=1	0	FALSE	8.069	5	1	1	1	1	460	49.6	6.09	4.71	1	cellular homeostasis;transport	membrane	transporter activity	Pf02535	64116	ENSG00000138821.12	SLC39A8	4		NRF2 pathway; Zinc homeostasis	0	6.732	0.01	0.265	100	1.786	4.49643e-16	3.59486e-16	4.24865e-16	3.54689e-16	0.100934	74.08		0		74.08	42	282.9		75.1	63.21
FALSE	Medium	Master Protein	Q6ZMK1	Cysteine and histidine-rich protein 1 OS=Homo sapiens OX=9606 GN=CYHR1 PE=1 SV=2	0.021	FALSE	2.586	4	1	1	1	1	362	40.7	7.23	0	1		cytoplasm	metal ion binding;protein binding		50626	ENSG00000187954.12	CYHR1	8			0	0.854	0.01	1.112	100	0.95	0.946102	3.59486e-16	0.998862	3.54689e-16	0.966313	0		16.06		14.5	142.6	121.8		135.5
FALSE	High	Master Protein	A6NHL2	Tubulin alpha chain-like 3 OS=Homo sapiens OX=9606 GN=TUBAL3 PE=1 SV=2	0	FALSE	46.858	11	6	227	2	1	446	49.9	6.05	432.05	6	cell organization and biogenesis	cytoplasm;cytoskeleton	catalytic activity;nucleotide binding;structural molecule activity	Pf00091, Pf03953	79861	ENSG00000178462.11	TUBAL3	10	Pathogenic Escherichia coli infection; Gap junction; Phagosome; Apoptosis	Pathogenic Escherichia coli infection; Parkin-Ubiquitin Proteasomal System pathway	0	0.844	0.01	0.531	100	1.091	0.837602	3.59486e-16	0.0152914	3.54689e-16	0.981508	53.33		33.59		112.25	260.3	97.5		42.2	52.76	73.01
TRUE	High	Master Protein	P52435	DNA-directed RNA polymerase II subunit RPB11-a OS=Homo sapiens OX=9606 GN=POLR2J PE=1 SV=1	0.001	FALSE	7.18	15	1	1	1	1	117	13.3	5.86	3.09	1	metabolic process;regulation of biological process;response to stimulus	nucleus	catalytic activity;DNA binding;protein binding	Pf13656	5439	ENSG00000005075.15	POLR2J	7	Epstein-Barr virus infection; Huntington's disease; Purine metabolism; RNA polymerase; Metabolic pathways; Pyrimidine metabolism	Eukaryotic Transcription Initiation	0	100		22.887	100	100	4.49643e-16		4.24865e-16	3.54689e-16	3.9087e-16			0				16.7		383.3
FALSE	High	Master Protein Candidate	Q9H1A7	DNA-directed RNA polymerase II subunit RPB11-b2 OS=Homo sapiens OX=9606 GN=POLR2J3 PE=3 SV=1	0.001	FALSE	7.18	15	1	1	1	1	115	13.1	6.29	3.09	1	metabolic process	nucleus	catalytic activity;DNA binding;protein binding	Pf01193, Pf13656	548644; 246721		POLR2J3; POLR2J2	7			0	100		22.887	100	100	4.49643e-16		4.24865e-16	3.54689e-16	3.9087e-16			0				16.7		383.3
FALSE	Medium	None	Q9NZM3	Intersectin-2 OS=Homo sapiens OX=9606 GN=ITSN2 PE=1 SV=3	0.021	FALSE	2.572	1	1	1	1	1	1697	193.3	8.12	1.96	1	cell differentiation;regulation of biological process;transport	cytoplasm	metal ion binding;protein binding	Pf00018, Pf00168, Pf00621, Pf07653, Pf12763, Pf14604	50618	ENSG00000198399.14	ITSN2	2			0	1.052	0.01	0.984	100	1.073	0.958884	3.59486e-16	0.972282	3.54689e-16	0.992073	30.74		27.57		20.98	128.1	134.4		137.4	17.53	31.93
FALSE	High	None	Q8NB66	Protein unc-13 homolog C OS=Homo sapiens OX=9606 GN=UNC13C PE=2 SV=3	0.008	FALSE	3.345	0	1	1	1	1	2214	250.8	5.92	2.11	1	cell communication;regulation of biological process;response to stimulus;transport	cytoplasm;membrane	metal ion binding;protein binding	Pf00130, Pf00168, Pf06292, Pf10540	440279	ENSG00000137766.16	UNC13C	15	Synaptic vesicle cycle	Synaptic Vesicle Pathway	0	0.508	0.01	1.278	100	0.65	0.1147	3.59486e-16	0.958588	3.54689e-16	0.57668	39.51		71.31		52.47	185.4	94.2		120.4		101.52
FALSE	High	Master Protein	Q9UKM7	Endoplasmic reticulum mannosyl-oligosaccharide 1,2-alpha-mannosidase OS=Homo sapiens OX=9606 GN=MAN1B1 PE=1 SV=2	0.006	FALSE	3.629	2	1	1	1	1	699	79.5	7.72	2.04	1	metabolic process	endoplasmic reticulum;Golgi;membrane	catalytic activity;metal ion binding	Pf01532	11253	ENSG00000177239.14	MAN1B1	9	N-Glycan biosynthesis; Protein processing in endoplasmic reticulum; Metabolic pathways		0	1.015	0.01	0.727	100	0.738	0.976234	3.59486e-16	0.590738	3.54689e-16	0.706437	0		0		0	145.3	147.5		107.2
FALSE	Medium	Master Protein	O95714	E3 ubiquitin-protein ligase HERC2 OS=Homo sapiens OX=9606 GN=HERC2 PE=1 SV=2	0.048	FALSE	1.981	0	1	1	1	1	4834	526.9	6.28	2.57	1	metabolic process;response to stimulus;transport	cytoplasm;cytoskeleton;membrane;nucleus	catalytic activity;metal ion binding;protein binding	Pf00173, Pf00415, Pf00569, Pf00632, Pf03256, Pf06701, Pf11515, Pf13540	8924	ENSG00000128731.15	HERC2	15	Ubiquitin mediated proteolysis		0	1.005	0.01	1.149	100	1.155	0.976252	3.59486e-16	0.971175	3.54689e-16	0.948374	20.34		17.8		19.8	126.6	127.2		146.2		19.22
FALSE	Medium	Master Protein	Q3KQU3	MAP7 domain-containing protein 1 OS=Homo sapiens OX=9606 GN=MAP7D1 PE=1 SV=1	0.028	FALSE	2.34	1	1	2	1	1	841	92.8	10.11	3.42	1	cell organization and biogenesis	cytoplasm;cytoskeleton;cytosol	structural molecule activity		55700	ENSG00000116871.15	MAP7D1	1			0	0.982	0.01	1.987	100	1.95	0.991136	3.59486e-16	0.13375	3.54689e-16	0.0901257	0		57.24		57.24	101.7	99.9		198.4
FALSE	Medium	None	Q9P0M6	Core histone macro-H2A.2 OS=Homo sapiens OX=9606 GN=H2AFY2 PE=1 SV=3	0.027	FALSE	2.415	2	1	1	1	1	372	40	9.69	1.98	1	cell organization and biogenesis;regulation of biological process	chromosome;nucleus	DNA binding;protein binding	Pf00125, Pf01661	55506	ENSG00000099284.13	H2AFY2	10	Systemic lupus erythematosus; Alcoholism	Preimplantation Embryo	0	1.144	0.01	0.531	100	0.608	0.889251	3.59486e-16	0.0388717	3.54689e-16	0.143353	43.58		39.07		51.43	145.4	166.3		88.3	57.66	58.37
FALSE	High	Master Protein	O75907	Diacylglycerol O-acyltransferase 1 OS=Homo sapiens OX=9606 GN=DGAT1 PE=1 SV=2	0	FALSE	11.801	12	2	7	2	1	488	55.2	9.32	11.72	2	cell organization and biogenesis;metabolic process;transport	endoplasmic reticulum;membrane	catalytic activity;protein binding	Pf03062	8694	ENSG00000185000.11	DGAT1	8	Fat digestion and absorption; Glycerolipid metabolism; Retinol metabolism; Metabolic pathways	Triacylglyceride Synthesis; Statin Pathway; Vitamin A and Carotenoid Metabolism	0	1.505	0.01	0.908	100	1.339	0.0943698	3.59486e-16	0.883316	3.54689e-16	0.660379	117.42		58.59		109.86	127.5	146.1		126.4	11.83	128.79
FALSE	High	None	Q9UPW8	Protein unc-13 homolog A OS=Homo sapiens OX=9606 GN=UNC13A PE=2 SV=4	0.008	FALSE	3.345	1	1	1	1	1	1703	192.9	5.35	2.11	1	cell communication;cell differentiation;cell organization and biogenesis;metabolic process;regulation of biological process;response to stimulus;transport	cytoplasm;membrane	metal ion binding;protein binding	Pf00130, Pf00168, Pf06292, Pf10540	23025	ENSG00000130477.15	UNC13A	19	Synaptic vesicle cycle	Synaptic Vesicle Pathway	0	0.508	0.01	1.278	100	0.65	0.1147	3.59486e-16	0.958588	3.54689e-16	0.57668	39.51		71.31		52.47	185.4	94.2		120.4		101.52
FALSE	High	Master Protein	Q8N5I4	Dehydrogenase/reductase SDR family member on chromosome X OS=Homo sapiens OX=9606 GN=DHRSX PE=1 SV=2	0.007	FALSE	3.435	5	1	3	1	1	330	36.4	9	1.75	1	metabolic process;regulation of biological process	extracellular	catalytic activity	Pf00106, Pf08659, Pf13561, Pf13941	207063	ENSG00000169084.13	DHRSX	X|Y; X			0	0.01	0.01	100	100	1.698	4.49643e-16	3.59486e-16	4.24865e-16	3.54689e-16	0.416341					0	148.3			251.7
FALSE	High	Master Protein	Q9Y426	C2 domain-containing protein 2 OS=Homo sapiens OX=9606 GN=C2CD2 PE=1 SV=2	0.001	FALSE	7.306	3	1	1	1	1	696	75.5	6.92	4.41	1		cytosol;membrane;nucleus	protein binding	Pf00168	25966	ENSG00000157617.16	C2CD2	21			0	0.368	0.01	0.399	100	0.116	0.000740246	3.59486e-16	0.00793498	3.54689e-16	3.9087e-16	18.16		16.87		0.98	269.4	99.2		31.4		94.75
FALSE	High	Master Protein	Q15582	Transforming growth factor-beta-induced protein ig-h3 OS=Homo sapiens OX=9606 GN=TGFBI PE=1 SV=1	0	FALSE	23.558	12	5	8	5	1	683	74.6	7.71	16.73	5	cell differentiation;cell organization and biogenesis;cell proliferation;metabolic process;regulation of biological process;response to stimulus	extracellular;membrane	protein binding	Pf02469, Pf07546	7045	ENSG00000120708.16	TGFBI	5			0	100		0.925	100	100	4.49643e-16		0.703334	3.54689e-16	3.9087e-16			64.99				236.5		163.5		58.71
TRUE	High	Master Protein	P02461	Collagen alpha-1(III) chain OS=Homo sapiens OX=9606 GN=COL3A1 PE=1 SV=4	0.004	FALSE	4.084	2	1	1	1	1	1466	138.5	6.61	0	1	cell organization and biogenesis;metabolic process;regulation of biological process;response to stimulus	extracellular;organelle lumen	metal ion binding;protein binding;structural molecule activity	Pf00093, Pf01410, Pf14828	1281	ENSG00000168542.14	COL3A1	2	Amoebiasis; Protein digestion and absorption; AGE-RAGE signaling pathway in diabetic complications; Platelet activation	Senescence and Autophagy in Cancer; Focal Adhesion; Focal Adhesion-PI3K-Akt-mTOR-signaling pathway; Inflammatory Response Pathway; miR-509-3p alteration of YAP1/ECM axis; miRNA targets in ECM and membrane receptors	0	100		1.463	100	100	4.49643e-16		0.721001	3.54689e-16	3.9087e-16			0				162.4		237.6
FALSE	High	Master Protein	Q5MNZ6	WD repeat domain phosphoinositide-interacting protein 3 OS=Homo sapiens OX=9606 GN=WDR45B PE=1 SV=2	0	FALSE	9.739	6	2	4	2	1	344	38.1	7.59	5.92	2	metabolic process	cytosol;membrane	protein binding		56270	ENSG00000141580.15	WDR45B; WDR45L	17			0	0.854	0.01	0.973	100	0.915	0.933093	3.59486e-16	0.955645	3.54689e-16	0.948374	21.7		36.32		56.04	150.2	76.2		173.6	50.17	37.66
FALSE	High	Master Protein	Q9BQ75	Protein CMSS1 OS=Homo sapiens OX=9606 GN=CMSS1 PE=1 SV=2	0.004	FALSE	4.125	5	1	1	1	1	279	31.9	9.19	2.15	1		nucleus	nucleotide binding;RNA binding	Pf00270, Pf14617	84319	ENSG00000184220.11	CMSS1	3			0	1.2	0.01	0.914	100	1.096	0.827689	3.59486e-16	0.915796	3.54689e-16	0.992073	0		0		0	121.3	145.6		133
FALSE	Low	Master Protein	Q13415	Origin recognition complex subunit 1 OS=Homo sapiens OX=9606 GN=ORC1 PE=1 SV=2	0.073	FALSE	1.581	1	1	1	1	1	861	97.3	9.22	1.61	1	metabolic process;regulation of biological process	cytosol;membrane;nucleus	DNA binding;nucleotide binding;protein binding	Pf00004, Pf01426, Pf09079, Pf13191, Pf13401	4998	ENSG00000085840.12	ORC1	1	Cell cycle	DNA Replication; G1 to S cell cycle control; Retinoblastoma (RB) in Cancer; Cell Cycle	0	1.118	0.01	1.069	100	1.195	0.911147	3.59486e-16	0.999979	3.54689e-16	0.93579	5.7		3.13		36.53	120.7	135		144.3	56.81
FALSE	Medium	None	A6NMX2	Eukaryotic translation initiation factor 4E type 1B OS=Homo sapiens OX=9606 GN=EIF4E1B PE=3 SV=3	0.027	FALSE	2.413	3	1	2	1	1	242	27.6	7.17	4.37	1	metabolic process;regulation of biological process	cytoplasm	RNA binding	Pf01652	253314	ENSG00000175766.11	EIF4E1B	5	Insulin signaling pathway; HIF-1 signaling pathway; EGFR tyrosine kinase inhibitor resistance; mTOR signaling pathway; RNA transport; Longevity regulating pathway; PI3K-Akt signaling pathway	Focal Adhesion-PI3K-Akt-mTOR-signaling pathway	0	0.148	0.01	0.09	100	0.013	4.49643e-16	3.59486e-16	4.24865e-16	3.54689e-16	3.9087e-16	26.28		9.83		0	344.5	50.9		4.6		140.36
FALSE	High	Master Protein	Q8NC96	Adaptin ear-binding coat-associated protein 1 OS=Homo sapiens OX=9606 GN=NECAP1 PE=1 SV=2	0	FALSE	9.851	10	1	4	1	1	275	29.7	6.8	16.45	1	cell organization and biogenesis;transport	cytosol;membrane		Pf07933	25977	ENSG00000089818.17	NECAP1	12			0	1.088	0.01	1.083	100	1.169	0.865976	3.59486e-16	0.998862	3.54689e-16	0.864473	22.07		11.2		20.07	125.1	132		142.9	63.21	11.46
TRUE	High	Master Protein	P51511	Matrix metalloproteinase-15 OS=Homo sapiens OX=9606 GN=MMP15 PE=1 SV=1	0	FALSE	7.608	4	2	2	2	1	669	75.8	7.46	1.92	2	cell differentiation;cell organization and biogenesis;metabolic process;regulation of biological process;response to stimulus	membrane	catalytic activity;enzyme regulator activity;metal ion binding;protein binding	Pf00045, Pf00413, Pf01471, Pf07998, Pf11857	4324	ENSG00000102996.4	MMP15	16		Matrix Metalloproteinases	0	0.331	0.01	1.396	100	0.462	7.89998e-05	3.59486e-16	0.799675	3.54689e-16	0.00831732	4.61		8.03		8.52	223	73.9		103.1	38.6
TRUE	Low	Master Protein	P52756	RNA-binding protein 5 OS=Homo sapiens OX=9606 GN=RBM5 PE=1 SV=2	0.07	FALSE	1.604	1	1	1	1	1	815	92.1	6.28	1.87	1	cell death;cell organization and biogenesis;metabolic process;regulation of biological process	nucleus;spliceosomal complex	DNA binding;metal ion binding;protein binding;RNA binding	Pf00076, Pf00641, Pf01585, Pf12656, Pf14259	10181	ENSG00000003756.16	RBM5	3		mRNA Processing	0	2.393	0.01	0.386	100	0.923	0.000507628	3.59486e-16	0.00490122	3.54689e-16	0.973539	76.19		10.64		37.25	92.7	221.8		85.6	46.14	82.71
FALSE	Medium	Master Protein	Q13625	Apoptosis-stimulating of p53 protein 2 OS=Homo sapiens OX=9606 GN=TP53BP2 PE=1 SV=2	0.017	FALSE	2.738	2	1	1	1	1	1128	125.5	6.07	0	1	cell death;metabolic process;regulation of biological process;response to stimulus	cytoplasm;mitochondrion;nucleus	protein binding	Pf00018, Pf00023, Pf04111, Pf04156, Pf06785, Pf07653, Pf12252, Pf12796, Pf13606, Pf13637, Pf13857, Pf14604, Pf15548	7159		TP53BP2	1	Hippo signaling pathway		0	0.557	0.01	1.589	100	0.875	0.171064	3.59486e-16	0.721001	3.54689e-16	0.952339	5.16		18.84		20.68	165.9	88.8		145.3	13.66	8.42
FALSE	High	Master Protein	P24386	Rab proteins geranylgeranyltransferase component A 1 OS=Homo sapiens OX=9606 GN=CHM PE=1 SV=3	0	FALSE	7.916	3	1	1	1	1	653	73.4	4.75	4.09	1	cell organization and biogenesis;metabolic process;regulation of biological process;response to stimulus;transport	cytoplasm;cytosol	catalytic activity;enzyme regulator activity;protein binding	Pf00996, Pf12831, Pf13450	1121	ENSG00000188419.13	CHM	X			0			100	100	100			4.24865e-16	3.54689e-16	3.9087e-16									400
FALSE	High	Master Protein	Q5TCQ9	Membrane-associated guanylate kinase, WW and PDZ domain-containing protein 3 OS=Homo sapiens OX=9606 GN=MAGI3 PE=1 SV=3	0.001	FALSE	5.23	1	1	1	1	1	1481	162.8	8.09	2.33	1											0	0.907	0.01	0.949	100	0.86	0.964642	3.59486e-16	0.917634	3.54689e-16	0.783312	15.14		23.79		21.88	144.5	131.1		124.4	1.98	17.67
FALSE	High	Master Protein	Q9H8T0	AKT-interacting protein OS=Homo sapiens OX=9606 GN=AKTIP PE=1 SV=1	0.005	FALSE	3.821	8	1	1	1	1	292	33.1	9.31	2.44	1	cell death;cell organization and biogenesis;metabolic process;regulation of biological process;transport	cytoplasm;cytosol;membrane	catalytic activity;protein binding	Pf00179	64400	ENSG00000166971.16	AKTIP	16			0	1.767	0.059	1.359	40.447	2.401	0.0998952	3.59486e-16	0.780154	3.54689e-16	0.00533152	122.69	0.53	38.17	46.38	109.57	76.5	135.2	4.5	183.7	100.27	27.21
FALSE	Medium	Master Protein	O60447	Ecotropic viral integration site 5 protein homolog OS=Homo sapiens OX=9606 GN=EVI5 PE=1 SV=3	0.042	FALSE	2.041	1	1	2	1	1	810	92.9	6.1	0	1	cell division;cell proliferation;development;metabolic process;regulation of biological process;transport	cytoplasm;cytoskeleton;cytosol;nucleus	catalytic activity;enzyme regulator activity;motor activity;protein binding	Pf00566, Pf01576, Pf02463, Pf04111, Pf05557, Pf06570, Pf07888, Pf12128	7813	ENSG00000067208.14	EVI5	1			0	1.984	0.854	3.79	14.841	7.518	0.038163	0.936868	0.00034261	3.54689e-16	1.60219e-10	168.12	91.19	0	139.04	168.12	36.3	72.1	18.4	273.2	106.07
FALSE	High	Master Protein	Q9P0V3	SH3 domain-binding protein 4 OS=Homo sapiens OX=9606 GN=SH3BP4 PE=1 SV=1	0	FALSE	8.202	3	1	2	1	1	963	107.4	7.71	9.03	1	regulation of biological process;response to stimulus;transport	cytoplasm;membrane;nucleus	enzyme regulator activity;protein binding	Pf00018, Pf07653, Pf14604	23677	ENSG00000130147.15	SH3BP4	2			0	0.156	0.076	7.126	14.567	1.109	4.49643e-16	3.59486e-16	4.24865e-16	3.54689e-16	0.928597	0	0	0	0	0	170.9	26.6	13	189.5
FALSE	High	Master Protein	Q9C037	E3 ubiquitin-protein ligase TRIM4 OS=Homo sapiens OX=9606 GN=TRIM4 PE=1 SV=2	0	FALSE	7.637	5	2	4	2	1	500	57.4	8.1	9.94	2	cell organization and biogenesis;defense response;metabolic process;response to stimulus	cytoplasm;cytosol;membrane	catalytic activity;metal ion binding;protein binding	Pf00097, Pf00622, Pf00643, Pf13445, Pf13639, Pf13765, Pf13920, Pf13923, Pf14570, Pf14634, Pf15227	89122	ENSG00000146833.15	TRIM4	7			0	1.018	1.458	0.614	14.35	5.99	0.812719	0.567786	3.95271e-11	3.54689e-16	3.9087e-16	49.7	101.37	12.65	842.32	761.92	3.5	237.8	3.5	155.2	168.79	85.88
FALSE	Medium	None	Q99456	Keratin, type I cytoskeletal 12 OS=Homo sapiens OX=9606 GN=KRT12 PE=1 SV=1	0.021	TRUE	2.579	1	1	2	0	5	494	53.5	4.78	3.92	1	cell death	cytosol	structural molecule activity	Pf00038	3859	ENSG00000263243.2; ENSG00000187242.4	KRT12	17; CHR_HSCHR17_4_CTG4			0	0.951	0.092	1.078	11.24	1.075	0.994315	3.59486e-16	0.999979	3.54689e-16	0.991755	16.32	0.27	15.69	31.02	15.69	125.8	125.4	13.7	135.2	27.22	6.93
FALSE	Medium	Master Protein	Q8TCG5	Carnitine O-palmitoyltransferase 1, brain isoform OS=Homo sapiens OX=9606 GN=CPT1C PE=1 SV=1	0.011	FALSE	3.105	1	1	1	1	1	803	90.9	8.12	0	1	metabolic process	endoplasmic reticulum;membrane;mitochondrion	catalytic activity;protein binding	Pf00755	126129	ENSG00000169169.14	CPT1C	19	Fatty acid degradation; PPAR signaling pathway; Glucagon signaling pathway; AMPK signaling pathway; Adipocytokine signaling pathway; Fatty acid metabolism	PPAR signaling pathway; AMP-activated Protein Kinase (AMPK) Signaling	0	0.783	0.242	1.292	10.413	1.513	0.901758	0.000633534	0.950695	3.54689e-16	0.69021	54.4	5.39	13.95	74.03	55.36	103.4	125.1	15	156.5	78.59	77.06
FALSE	Low	Master Protein	Q9BPU6	Dihydropyrimidinase-related protein 5 OS=Homo sapiens OX=9606 GN=DPYSL5 PE=1 SV=1	0.111	FALSE	1.26	2	1	1	1	1	564	61.4	7.2	3.08	1	cellular component movement;regulation of biological process;response to stimulus	cytoplasm;cytosol	catalytic activity;protein binding	Pf01979, Pf13147, Pf13594	56896	ENSG00000157851.16	DPYSL5	2	Axon guidance		0	0.617	0.985	14.278	8.945	8.813	0.491973	0.989686	4.24865e-16	3.54689e-16	3.9087e-16	19.65	0	51.57	0	0	35	21.6	34.5	308.8		46.46
FALSE	Low	Master Protein	A0A0B4J2F0	Protein PIGBOS1 OS=Homo sapiens OX=9606 GN=PIGBOS1 PE=3 SV=1	0.105	FALSE	1.304	19	1	2	1	1	54	6.3	8.5	0	1		extracellular			101928527	ENSG00000225973.3	LOC101928527; PIGBOS1	15			0	0.909	0.143	1.222	8.001	0.949	0.991136	9.69567e-08	0.970958	5.30325e-14	0.98668	23.48	0.61	12.66	2.6	65	125	113.7	17.9	143.4	27.68	5.79
FALSE	High	Master Protein	Q8TE99	2-phosphoxylose phosphatase 1 OS=Homo sapiens OX=9606 GN=PXYLP1 PE=1 SV=1	0.007	FALSE	3.499	2	1	1	1	1	480	55.2	8.98	2.07	1	metabolic process;regulation of biological process	Golgi;membrane	catalytic activity;protein binding;receptor activity;signal transducer activity	Pf00328	92370	ENSG00000155893.12	ACPL2; PXYLP1	3			0	0.168	0.1	4.433	7.417	0.743	4.11724e-12	7.3974e-11	0.000121953	3.85573e-13	0.754516	0	0.15	0	14.89	0	199	33.3	19.9	147.8
FALSE	High	Master Protein	P07585	Decorin OS=Homo sapiens OX=9606 GN=DCN PE=1 SV=1	0	FALSE	9.474	10	2	5	2	1	359	39.7	8.54	13.79	2	cell organization and biogenesis;metabolic process;regulation of biological process;response to stimulus	cytoplasm;extracellular;organelle lumen	enzyme regulator activity;protein binding;RNA binding	Pf01462, Pf12799, Pf13855	1634	ENSG00000011465.16	DCN	12	TGF-beta signaling pathway; Proteoglycans in cancer	BMP2-WNT4-FOXO1 Pathway in Human Primary Endometrial Stromal Cell Differentiation	0	10.521	2.046	1.352	6.952	14.223	4.49643e-16	0.33832	0.807424	3.54689e-16	3.9087e-16	131.11	0	70.11	32.78	32.78	14.4	151.4	29.4	204.7		89.63
FALSE	Low	Master Protein	Q9BYK8	Helicase with zinc finger domain 2 OS=Homo sapiens OX=9606 GN=HELZ2 PE=1 SV=6	0.144	FALSE	1.084	1	1	2	1	1	2649	294.5	7.49	0	1	metabolic process;regulation of biological process	membrane;nucleus	catalytic activity;DNA binding;metal ion binding;nucleotide binding;protein binding;RNA binding	Pf00773, Pf04851, Pf13086, Pf13087, Pf13538	85441	ENSG00000130589.16	HELZ2	20			0	0.977	0.409	3.294	6.796	2.865	0.989869	0.00449361	1.67234e-09	3.54689e-16	4.25077e-09	39.02	9.45	70.9	56.6	61.74	77.7	60.2	31.8	230.3	78.16	87.87
FALSE	High	Master Protein	Q86UB9	Transmembrane protein 135 OS=Homo sapiens OX=9606 GN=TMEM135 PE=2 SV=2	0.007	FALSE	3.553	2	1	4	1	1	458	52.3	9.45	5.28	1	cell organization and biogenesis;regulation of biological process;response to stimulus	membrane;mitochondrion		Pf02466	65084	ENSG00000166575.16	TMEM135	11			0	1.088	0.169	0.946	6.099	1.029	0.648628	3.59486e-16	0.721001	3.54689e-16	0.999858	53.54	4.09	50.62	139.5	55.65	121.8	132.4	20.5	125.3	77.85	76.17
TRUE	High	Master Protein	Q15819	Ubiquitin-conjugating enzyme E2 variant 2 OS=Homo sapiens OX=9606 GN=UBE2V2 PE=1 SV=4	0	FALSE	53.584	45	7	84	1	1	145	16.4	8.09	232.77	7	cell proliferation;metabolic process;regulation of biological process;response to stimulus	cytoplasm;nucleus	catalytic activity;protein binding	Pf00179	7336	ENSG00000169139.11	UBE2V2	8			0	100	100	1.294	5.304	100	4.49643e-16	3.59486e-16	0.917634	1.28197e-09	3.9087e-16			49.29	70.86			166.1	19	214.9		57.44
FALSE	Medium	Master Protein	P13987	CD59 glycoprotein OS=Homo sapiens OX=9606 GN=CD59 PE=1 SV=1	0.03	FALSE	2.299	9	1	1	1	1	128	14.2	6.48	2.94	1	cell organization and biogenesis;coagulation;regulation of biological process;response to stimulus;transport	cell surface;extracellular;membrane	protein binding	Pf00021	966	ENSG00000085063.14	CD59	11	Hematopoietic cell lineage; Complement and coagulation cascades		0	0.886	0.224	1.282	5.267	1.181	0.97502	4.25308e-05	0.917634	2.84724e-10	0.949437	22.49	0.62	27.55	0	12.29	120.3	110.8	27	142	12.21	25.84
TRUE	Low	Master Protein	O75044	SLIT-ROBO Rho GTPase-activating protein 2 OS=Homo sapiens OX=9606 GN=SRGAP2 PE=1 SV=3	0.149	FALSE	1.065	1	1	3	1	1	1071	120.8	6.7	0	1											0	2.663	1.48	2.89	5.199	7.696	0.000214473	0.810073	7.54339e-05	3.54689e-16	3.9087e-16	140.24	140.24	0	0	140.24	31.2	83	46.1	239.8	97.18
FALSE	High	Master Protein	Q96EB1	Elongator complex protein 4 OS=Homo sapiens OX=9606 GN=ELP4 PE=1 SV=2	0	FALSE	9.718	4	1	4	1	1	424	46.6	8.51	11.03	1	cell organization and biogenesis;metabolic process;regulation of biological process	cytoplasm;nucleus	catalytic activity;enzyme regulator activity;protein binding	Pf05625	26610	ENSG00000109911.18	ELP4	11		Mesodermal Commitment Pathway	0	0.978	0.204	1.081	5.174	1.057	0.991281	1.18032e-09	0.998862	3.54689e-16	0.992073	27.14	1.19	0	0	28.38	123.5	120.7	25.2	130.6	26.58
FALSE	Low	Master Protein	Q75QN2	Integrator complex subunit 8 OS=Homo sapiens OX=9606 GN=INTS8 PE=1 SV=1	0.16	FALSE	1.003	1	1	3	1	1	995	113	7.05	3.82	1	metabolic process	nucleus	protein binding		55656	ENSG00000164941.13	INTS8	8			0	0.366	0.454	6.116	4.93	2.239	0.000775342	0.0133994	4.24865e-16	3.54689e-16	3.93387e-05	17.06	45.88	188.3	328.96	59.53	98.5	36.1	44.8	220.6	52.69	111.11
FALSE	High	Master Protein	P47224	Guanine nucleotide exchange factor MSS4 OS=Homo sapiens OX=9606 GN=RABIF PE=1 SV=2	0.005	FALSE	3.675	9	1	4	1	1	123	13.8	5.52	10.13	1	cell organization and biogenesis;regulation of biological process;response to stimulus;transport	cytosol;membrane	metal ion binding;protein binding	Pf04421	5877	ENSG00000183155.4	RABIF	1		Retinoblastoma (RB) in Cancer	0	0.01	1.325	100	4.88	6.467	4.49643e-16	0.77319	4.24865e-16	3.54689e-16	3.9087e-16		89.34		349.71	439.63	45.5		60.3	294.2	134.01
FALSE	High	Master Protein	Q53FP2	Transmembrane protein 35A OS=Homo sapiens OX=9606 GN=TMEM35A PE=2 SV=2	0.004	FALSE	3.95	5	1	5	1	1	167	18.4	10.08	11.3	1		membrane			59353	ENSG00000126950.7	TMEM35; TMEM35A	X			0	0.979	0.235	1.027	4.879	1.179	0.993866	1.26961e-08	0.995898	3.54689e-16	0.890641	30.01	4.11	100.23	76.3	72.43	102	97.5	23.9	176.5	32.02	42.53
FALSE	High	Master Protein	Q8N442	Translation factor GUF1, mitochondrial OS=Homo sapiens OX=9606 GN=GUF1 PE=1 SV=1	0	FALSE	10.961	4	2	2	2	1	669	74.3	8.59	5.71	2	metabolic process;regulation of biological process;response to stimulus	membrane;mitochondrion;organelle lumen	catalytic activity;nucleotide binding	Pf00009, Pf00071, Pf00679, Pf03144, Pf06421, Pf14492	60558	ENSG00000151806.13	GUF1	4			0	0.989		0.838	4.851	0.688	0.976234		0.851237	5.98377e-08	0.707693	9.21		19.56	338.24	4.45	79.5	144.3	55.2	121	8.96	76.68
FALSE	High	Master Protein	P31151	Protein S100-A7 OS=Homo sapiens OX=9606 GN=S100A7 PE=1 SV=4	0.001	FALSE	6.105	19	1	1	1	1	101	11.5	6.77	2.15	1	cell differentiation;defense response;regulation of biological process;response to stimulus;transport	cytoplasm;cytosol;endoplasmic reticulum;extracellular;nucleus;organelle lumen	metal ion binding;protein binding	Pf01023	6278	ENSG00000143556.8	S100A7	1			0	0.566	0.846	6.933	4.639	3.926	0.411191	0.933457	5.29315e-08	2.22925e-07	0.000115797	0	0	0	0	0	63.1	35.7	53.4	247.8
FALSE	High	Master Protein	Q9Y3C1	Nucleolar protein 16 OS=Homo sapiens OX=9606 GN=NOP16 PE=1 SV=2	0	FALSE	18.104	23	3	5	3	1	178	21.2	9.94	13.92	3		nucleus	RNA binding	Pf09420	51491	ENSG00000048162.20	NOP16	5			0	1.151	0.533	1.482	4.601	1.389	0.871919	0.389014	0.547994	2.19433e-08	0.786656	136.7	36.93	131.39	122.95	108.5	25.8	263.4	6.4	104.3	91.08	29.89
FALSE	High	Master Protein	P53677	AP-3 complex subunit mu-2 OS=Homo sapiens OX=9606 GN=AP3M2 PE=2 SV=1	0	FALSE	10.723	11	3	14	1	1	418	46.9	7.56	37.03	3	cellular component movement;transport	Golgi;membrane		Pf00928	10947	ENSG00000070718.11	AP3M2	8	Lysosome		0	0.01	0.273	100	4.338	1.183	4.49643e-16	8.53159e-10	4.24865e-16	3.54689e-16	0.875649		4.1		87.89	0	162.9		44.4	192.7
FALSE	High	Master Protein	Q3ZCW2	Galectin-related protein OS=Homo sapiens OX=9606 GN=LGALSL PE=1 SV=2	0	FALSE	17.678	34	3	8	3	1	172	19	5.35	22.24	3			protein binding	Pf00337	29094	ENSG00000119862.12	LGALSL	2			0	1.056	0.513	0.977	4.269	0.712	0.923575	0.0048487	0.95392	3.54689e-16	0.403613	109.18	34.55	44.02	100.15	0.13	81.6	175.8	108.5	34.1	52.26	11.17
TRUE	High	Master Protein	Q9Y2Y1	DNA-directed RNA polymerase III subunit RPC10 OS=Homo sapiens OX=9606 GN=POLR3K PE=1 SV=2	0.001	FALSE	6.939	24	1	1	1	1	108	12.3	7.83	2.63	1	defense response;metabolic process;regulation of biological process;response to stimulus	cytosol;nucleus	catalytic activity;metal ion binding	Pf01096	51728		POLR3K	16	Epstein-Barr virus infection; Purine metabolism; Cytosolic DNA-sensing pathway; RNA polymerase; Metabolic pathways; Pyrimidine metabolism	Eukaryotic Transcription Initiation	0	3.284	0.725	0.993	4.074	3.261	4.49643e-16	0.529775	0.955713	3.54689e-16	3.9087e-16	36.24	23.76	0	31.2	36.24	47.9	157.4	38.4	156.3	44.37
FALSE	High	Master Protein	P03886	NADH-ubiquinone oxidoreductase chain 1 OS=Homo sapiens OX=9606 GN=MT-ND1 PE=1 SV=1	0.001	FALSE	6.722	6	1	1	1	1	318	35.6	6.55	4.51	1	cell organization and biogenesis;metabolic process;response to stimulus;transport	membrane;mitochondrion	catalytic activity;protein binding	Pf00146	4535	ENSG00000198888.2	ND1	MT	Parkinson's disease; Oxidative phosphorylation; Metabolic pathways	Oxidative phosphorylation; Electron Transport Chain	0	0.092	0.035	1.499	3.976	0.138	4.49643e-16	3.59486e-16	0.741153	2.20483e-06	3.9087e-16	0	0.03	0.64	29.16	0.01	316.2	29.1	11	43.7
FALSE	High	Master Protein	Q9UHA3	Probable ribosome biogenesis protein RLP24 OS=Homo sapiens OX=9606 GN=RSL24D1 PE=1 SV=1	0.001	FALSE	6.12	7	1	4	1	1	163	19.6	9.98	10.92	1	cell organization and biogenesis;metabolic process	nucleus;ribosome	protein binding;RNA binding;structural molecule activity	Pf01246	51187	ENSG00000137876.9	RSL24D1	15	Ribosome		0	1.235	0.263	0.923	3.749	0.987	0.386092	7.52765e-13	0.819807	3.54689e-16	0.968988	42.16	11.81	46.36	143.25	43.78	108.4	133.8	33.2	124.6	21.22	34.37
TRUE	High	Master Protein	Q58FG0	Putative heat shock protein HSP 90-alpha A5 OS=Homo sapiens OX=9606 GN=HSP90AA5P PE=2 SV=1	0	FALSE	74.056	18	9	236	1	1	334	38.7	6.57	735.31	9	metabolic process;response to stimulus	cytoplasm	nucleotide binding;protein binding	Pf00183	730211		HSP90AA5P	3			0	100	100	0.783	3.718	100	4.49643e-16	3.59486e-16	0.739223	9.87842e-06	3.9087e-16			22.04	341.53			200.6	42.3	157.1		33.33
FALSE	High	Master Protein	Q9H9C1	Spermatogenesis-defective protein 39 homolog OS=Homo sapiens OX=9606 GN=VIPAS39 PE=1 SV=1	0.007	FALSE	3.436	2	1	2	1	1	493	57	7.4	1.73	1	cell differentiation;cell organization and biogenesis;metabolic process;regulation of biological process;transport	cytoplasm;endosome;Golgi	protein binding	Pf09787	63894	ENSG00000151445.15	VIPAS39	14			0	0.925	0.196	0.914	3.717	0.76	0.989217	1.47193e-06	0.921974	5.82515e-06	0.733794	20.45	0.79	32.03	51.7	25.04	140	130.6	27.4	102	69.12	71.72
FALSE	High	None	Q309B1	Tripartite motif-containing protein 16-like protein OS=Homo sapiens OX=9606 GN=TRIM16L PE=2 SV=3	0	FALSE	7.627	4	1	4	1	1	348	40.3	6.2	10.88	1		cytoplasm;cytosol;membrane	protein binding	Pf00622, Pf13765	147166	ENSG00000108448.20	TRIM16L	17			0	0.996	0.298	0.99	3.622	1.081	0.987056	2.13214e-06	0.972282	1.5141e-10	0.97742	40.78	2.32	20.82	11.49	17.76	113.4	130.3	33.8	122.5	19.54	34.75
FALSE	High	Master Protein	Q9Y5T4	DnaJ homolog subfamily C member 15 OS=Homo sapiens OX=9606 GN=DNAJC15 PE=1 SV=2	0.001	FALSE	5.933	9	1	1	1	1	150	16.4	10.08	3.35	1	cell communication;regulation of biological process;response to stimulus;transport	membrane;mitochondrion	protein binding	Pf00226	29103	ENSG00000120675.5	DNAJC15	13			0	0.743	0.258	1.256	3.616	0.933	0.446567	8.73097e-08	0.812688	8.38587e-12	0.920152	0	0	0	0	0	136.4	101.3	35.2	127.2
FALSE	High	Master Protein Candidate	Q4V326	G antigen 2E OS=Homo sapiens OX=9606 GN=GAGE2E PE=3 SV=2	0	FALSE	11.41	32	1	5	1	1	110	12.2	4.31	19.51	1											0	0.522	0.418	2.857	3.567	1.491	0.00200217	0.000175242	1.95962e-07	3.54689e-16	0.111403	19.6	0.56	67.07	12.97	13.01	116.6	60.8	48.7	173.8	2.66	62.7
FALSE	High	Master Protein Candidate	Q13068	G antigen 4 OS=Homo sapiens OX=9606 GN=GAGE4 PE=1 SV=2	0	FALSE	11.41	30	1	5	1	1	117	12.9	4.18	19.51	1	defense response;response to stimulus		protein binding	Pf05831	2543; 2576	ENSG00000205777.17	GAGE1; GAGE4	X			0	0.522	0.418	2.857	3.567	1.491	0.00200217	0.000175242	1.95962e-07	3.54689e-16	0.111403	19.6	0.56	67.07	12.97	13.01	116.6	60.8	48.7	173.8	2.66	62.7
FALSE	High	Master Protein Candidate	P0CL82	G antigen 12I OS=Homo sapiens OX=9606 GN=GAGE12I PE=1 SV=1	0	FALSE	11.41	30	1	5	1	1	117	13	4.35	19.51	1			protein binding	Pf05831	2579; 100008586; 26748; 645073; 729428	ENSG00000236362.8; ENSG00000215269.5	GAGE7; GAGE12F; GAGE12I; GAGE12G; GAGE12B	X			0	0.522	0.418	2.857	3.567	1.491	0.00200217	0.000175242	1.95962e-07	3.54689e-16	0.111403	19.6	0.56	67.07	12.97	13.01	116.6	60.8	48.7	173.8	2.66	62.7
FALSE	High	Master Protein	Q13065	G antigen 1 OS=Homo sapiens OX=9606 GN=GAGE1 PE=1 SV=2	0	FALSE	11.41	25	1	5	1	1	139	15.6	4.44	19.51	1	defense response;response to stimulus		protein binding	Pf05831	2543	ENSG00000205777.17	GAGE1	X			0	0.522	0.418	2.857	3.567	1.491	0.00200217	0.000175242	1.95962e-07	3.54689e-16	0.111403	19.6	0.56	67.07	12.97	13.01	116.6	60.8	48.7	173.8	2.66	62.7
FALSE	High	None	Q7Z3Y7	Keratin, type I cytoskeletal 28 OS=Homo sapiens OX=9606 GN=KRT28 PE=1 SV=2	0	TRUE	13.116	5	3	15	1	1	464	50.5	5.47	25.58	3	cell death	cytoplasm;cytosol	structural molecule activity	Pf00038	162605	ENSG00000173908.8	KRT28	17			0	0.853	2.11	1.483	3.558	2.22	0.958884	0.0319091	0.600572	1.11818e-13	0.000607513	55.8	77.96	117.78	113.21	125.77	65.7	4	115.1	215.2	87.87	160.05
FALSE	High	None	Q7Z3Y8	Keratin, type I cytoskeletal 27 OS=Homo sapiens OX=9606 GN=KRT27 PE=1 SV=2	0	TRUE	10.223	4	2	5	1	1	459	49.8	5.05	6.36	2	cell death	cytoplasm;cytosol	structural molecule activity	Pf00038	342574	ENSG00000171446.6	KRT27	17			0	0.853	2.11	1.483	3.558	2.22	0.958884	0.0319091	0.600572	1.11818e-13	0.000607513	55.8	77.96	117.78	113.21	125.77	65.7	4	115.1	215.2	87.87	160.05
FALSE	High	None	Q7Z3Z0	Keratin, type I cytoskeletal 25 OS=Homo sapiens OX=9606 GN=KRT25 PE=1 SV=1	0	TRUE	10.223	4	2	5	1	1	450	49.3	5.08	6.36	2	cell death;cell organization and biogenesis	cytoplasm;cytosol	protein binding;structural molecule activity	Pf00038	147183	ENSG00000204897.6	KRT25	17			0	0.853	2.11	1.483	3.558	2.22	0.958884	0.0319091	0.600572	1.11818e-13	0.000607513	55.8	77.96	117.78	113.21	125.77	65.7	4	115.1	215.2	87.87	160.05
FALSE	High	None	Q7Z3Y9	Keratin, type I cytoskeletal 26 OS=Homo sapiens OX=9606 GN=KRT26 PE=1 SV=2	0.001	TRUE	7.107	2	1	4	0	2	468	51.9	4.92	3.91	1	cell death	cytosol	structural molecule activity	Pf00038	353288	ENSG00000186393.5	KRT26	17			0	0.853	4.402	1.483	3.558	3.848	0.976234	0.000719749	0.780154	4.46886e-06	4.83877e-05	55.8	39.04	117.78	117.7	238.14	23.7	20.2	101.1	255.1	38.3	160.05
FALSE	High	Master Protein	Q7Z5G4	Golgin subfamily A member 7 OS=Homo sapiens OX=9606 GN=GOLGA7 PE=1 SV=2	0	FALSE	8.47	19	2	4	2	1	137	15.8	7.05	6.66	2	cell organization and biogenesis;metabolic process;regulation of biological process;transport	extracellular;Golgi;membrane	catalytic activity;protein binding	Pf10256	51125	ENSG00000147533.16	GOLGA7	8			0	0.429	0.411	3.335	3.476	1.43	0.00885452	0.00981538	2.27182e-05	1.79656e-08	0.579451	2.92	8.09	15.22	51.89	17.04	122.3	52.5	50.3	174.9	16.74	14.97
FALSE	High	Master Protein	Q13601	KRR1 small subunit processome component homolog OS=Homo sapiens OX=9606 GN=KRR1 PE=1 SV=4	0.001	FALSE	6.589	3	1	4	1	1	381	43.6	9.77	10.96	1	metabolic process	cytoplasm;membrane;nucleus	protein binding;RNA binding	Pf00013	11103	ENSG00000111615.13	KRR1	12			0	1.058	0.349	0.894	3.457	0.946	0.923575	6.35185e-05	0.828386	5.29902e-10	0.961714	17.9	13.01	5.27	155.02	16.13	122.1	129.1	33.4	115.4	35.21	6.28
FALSE	High	Master Protein	P02751	Fibronectin OS=Homo sapiens OX=9606 GN=FN1 PE=1 SV=4	0	FALSE	86.814	9	13	27	13	1	2386	262.5	5.71	91.25	13	cell differentiation;cell organization and biogenesis;cellular component movement;defense response;metabolic process;regulation of biological process;response to stimulus;transport	extracellular;membrane;organelle lumen	enzyme regulator activity;protein binding	Pf00039, Pf00040, Pf00041	2335	ENSG00000115414.18	FN1	2	Amoebiasis; Pathways in cancer; AGE-RAGE signaling pathway in diabetic complications; Focal adhesion; Proteoglycans in cancer; Regulation of actin cytoskeleton; Bacterial invasion of epithelial cells; Small cell lung cancer; ECM-receptor interaction; PI3K-Akt signaling pathway	Senescence and Autophagy in Cancer; TGF-beta Signaling Pathway; Regulation of Actin Cytoskeleton; Focal Adhesion-PI3K-Akt-mTOR-signaling pathway; Association Between Physico-Chemical Features and Toxicity Associated Pathways; Rac1/Pak1/p38/MMP-2 pathway; miRNA targets in ECM and membrane receptors; Inflammatory Response Pathway; Focal Adhesion; miR-509-3p alteration of YAP1/ECM axis; TGF-B Signal…	0	2.092	1.612	1.422	3.401	2.182	9.77462e-15	0.223298	0.0380288	3.54689e-16	8.52028e-14	58.46	59.93	72.61	97.86	66.58	26.8	99.9	12.2	261.1	18.95	93.23
FALSE	High	Master Protein	Q9H7D0	Dedicator of cytokinesis protein 5 OS=Homo sapiens OX=9606 GN=DOCK5 PE=1 SV=3	0.004	FALSE	4.007	1	1	1	1	1	1870	215.2	7.96	2.33	1	regulation of biological process;response to stimulus	cytoplasm;cytosol;membrane	protein binding	Pf00018, Pf06920, Pf07653, Pf14429, Pf14604	80005	ENSG00000147459.17	DOCK5	8			0	0.827	1.001	4.098	3.385	3.389	0.911147	0.997752	2.00413e-10	3.03534e-11	3.00464e-10	0	0	229.79	229.79	229.79	64.3	53.2	64.4	218
FALSE	High	Master Protein	Q9ULR3	Protein phosphatase 1H OS=Homo sapiens OX=9606 GN=PPM1H PE=1 SV=2	0.001	FALSE	6.23	4	1	2	1	1	514	56.4	6.6	5.97	1	metabolic process	cytoplasm;nucleus	catalytic activity	Pf00481	57460	ENSG00000111110.11	PPM1H	12			0	1.822	0.5	0.9	3.281	1.641	6.0281e-05	0.00365142	0.737431	3.54689e-16	0.00871794	63.38	30.13	37.88	114.27	59.42	71.4	175.7	35.7	117.2	73.3	36.19
TRUE	Low	Master Protein	Q9NP80	Calcium-independent phospholipase A2-gamma OS=Homo sapiens OX=9606 GN=PNPLA8 PE=1 SV=1	0.056	FALSE	1.786	1	1	2	1	1	782	88.4	9.23	3.49	1	cell death;metabolic process;transport	cytoplasm;endoplasmic reticulum;Golgi;membrane	catalytic activity;nucleotide binding	Pf01734	50640	ENSG00000135241.16	PNPLA8	7		Eicosanoid Synthesis	0	2.083	1.609	2.512	3.252	5.233	0.0251338	0.754316	0.0416512	0.000112028	4.6083e-07	81.52	92.6	207.73	235.96	159.8	40.3	83.9	64.8	210.9	103.67	115.11
FALSE	High	Master Protein	P02452	Collagen alpha-1(I) chain OS=Homo sapiens OX=9606 GN=COL1A1 PE=1 SV=5	0	FALSE	20.477	4	3	7	3	1	1464	138.9	5.8	12.11	3	cell communication;cell differentiation;cell organization and biogenesis;cellular component movement;coagulation;metabolic process;regulation of biological process;response to stimulus;transport	cytoplasm;endoplasmic reticulum;extracellular;Golgi;organelle lumen	metal ion binding;protein binding;structural molecule activity	Pf00093, Pf01391, Pf01410	1277		COL1A1	17	Amoebiasis; Protein digestion and absorption; AGE-RAGE signaling pathway in diabetic complications; Focal adhesion; ECM-receptor interaction; PI3K-Akt signaling pathway; Platelet activation	Focal Adhesion-PI3K-Akt-mTOR-signaling pathway; Inflammatory Response Pathway; Focal Adhesion; miR-509-3p alteration of YAP1/ECM axis; Senescence and Autophagy in Cancer; Osteoblast Signaling	0	3.318		0.984	3.221	3.264	9.77462e-15		0.934083	3.54689e-16	3.9087e-16	0		84.75	47.24	30.2	24.3	131.5	27.9	216.3		95.37
FALSE	High	Master Protein Candidate	Q15561	Transcriptional enhancer factor TEF-3 OS=Homo sapiens OX=9606 GN=TEAD4 PE=1 SV=3	0.002	FALSE	4.379	3	1	4	1	1	434	48.3	7.33	7.1	1	metabolic process;regulation of biological process;response to stimulus	nucleus	DNA binding;protein binding	Pf01285	7004		TEAD4	12	Hippo signaling pathway; Hippo signaling pathway -multiple species	Preimplantation Embryo; miR-509-3p alteration of YAP1/ECM axis; VEGFA-VEGFR2 Signaling Pathway	0	0.905	0.2	0.699	3.168	0.632	0.986644	1.64393e-05	0.519093	0.000141171	0.451987	41.99	12.73	25.64	326.88	9.35	146.2	132.2	29.2	92.4	25.77	54.31
FALSE	High	Master Protein Candidate	P28347	Transcriptional enhancer factor TEF-1 OS=Homo sapiens OX=9606 GN=TEAD1 PE=1 SV=2	0.002	FALSE	4.379	3	1	4	1	1	426	47.9	8.15	7.1	1	cell organization and biogenesis;metabolic process;regulation of biological process;response to stimulus	nucleus	DNA binding;protein binding	Pf01285	7003	ENSG00000187079.16	TEAD1	11	Hippo signaling pathway; Hippo signaling pathway -multiple species	miR-509-3p alteration of YAP1/ECM axis; Mesodermal Commitment Pathway	0	0.905	0.2	0.699	3.168	0.632	0.986644	1.64393e-05	0.519093	0.000141171	0.451987	41.99	12.73	25.64	326.88	9.35	146.2	132.2	29.2	92.4	25.77	54.31
FALSE	High	Master Protein Candidate	Q99594	Transcriptional enhancer factor TEF-5 OS=Homo sapiens OX=9606 GN=TEAD3 PE=1 SV=2	0.002	FALSE	4.379	3	1	4	1	1	435	48.6	8.4	7.1	1	cell division;metabolic process;regulation of biological process;response to stimulus	nucleus	DNA binding;protein binding	Pf01285	7005	ENSG00000007866.19	TEAD3	6	Hippo signaling pathway; Hippo signaling pathway -multiple species		0	0.905	0.2	0.699	3.168	0.632	0.986644	1.64393e-05	0.519093	0.000141171	0.451987	41.99	12.73	25.64	326.88	9.35	146.2	132.2	29.2	92.4	25.77	54.31
FALSE	High	Master Protein	Q15562	Transcriptional enhancer factor TEF-4 OS=Homo sapiens OX=9606 GN=TEAD2 PE=1 SV=2	0.002	FALSE	4.379	2	1	4	1	1	447	49.2	6.47	7.1	1	cell differentiation;cell organization and biogenesis;metabolic process;regulation of biological process;response to stimulus	cytosol;nucleus	DNA binding;protein binding	Pf01285	8463	ENSG00000074219.13	TEAD2	19	Hippo signaling pathway; Hippo signaling pathway -multiple species	Mesodermal Commitment Pathway; miR-509-3p alteration of YAP1/ECM axis	0	0.905	0.2	0.699	3.168	0.632	0.986644	1.64393e-05	0.519093	0.000141171	0.451987	41.99	12.73	25.64	326.88	9.35	146.2	132.2	29.2	92.4	25.77	54.31
TRUE	High	Master Protein	Q9Y3R5	Protein dopey-2 OS=Homo sapiens OX=9606 GN=DOP1B PE=1 SV=5	0.006	FALSE	3.591	1	1	1	1	1	2298	258.1	6.29	0	1	cell organization and biogenesis;development;transport	cytosol;endosome;membrane		Pf04118	9980	ENSG00000142197.12	DOPEY2	21			0	2.675	0.852	1.794	3.104	4.8	1.28528e-09	0.908785	0.00511964	3.54689e-16	3.9087e-16	6	63.91	0.22	166.04	6	39.9	106.8	61.7	191.6	78.66
FALSE	High	Master Protein	Q9HAN9	Nicotinamide/nicotinic acid mononucleotide adenylyltransferase 1 OS=Homo sapiens OX=9606 GN=NMNAT1 PE=1 SV=1	0.001	FALSE	6.237	5	1	5	1	1	279	31.9	8.87	13.57	1	metabolic process;response to stimulus	nucleus	catalytic activity;nucleotide binding;protein binding	Pf01467	64802	ENSG00000173614.13	NMNAT1	1	Nicotinate and nicotinamide metabolism; Metabolic pathways	NAD+ biosynthetic pathways; NAD Biosynthesis II (from tryptophan); NAD+ metabolism	0	1.545	0.712	0.458	2.988	0.681	0.00358016	0.392872	1.06139e-07	2.53703e-08	0.0385617	114.88	56.71	7.43	112.71	16.26	116.1	179.3	26.2	78.4	84.84	63.7
FALSE	High	Master Protein	P04264	Keratin, type II cytoskeletal 1 OS=Homo sapiens OX=9606 GN=KRT1 PE=1 SV=6	0	FALSE	136.453	39	21	70	17	1	644	66	8.12	158.43	21	cell death;defense response;metabolic process;regulation of biological process;response to stimulus;transport	cytoskeleton;cytosol;extracellular;membrane;nucleus	catalytic activity;motor activity;protein binding;receptor activity;structural molecule activity	Pf00038, Pf01576, Pf05103, Pf05957, Pf12128, Pf13166, Pf13514	3848	ENSG00000167768.4	KRT1	12		Corticotropin-releasing hormone signaling pathway	1	0.512	1.083	4.882	2.956	2.423	1.46873e-10	0.953754	4.24865e-16	3.54689e-16	3.9087e-16	21.75	86.01	114.19	115.85	101	127.8	33.2	79.3	159.7	45.96	51.77
FALSE	High	None	Q8N1A0	Keratin-like protein KRT222 OS=Homo sapiens OX=9606 GN=KRT222 PE=2 SV=1	0.001	TRUE	5.188	3	1	7	0	4	295	34.1	5.87	16.68	1			structural molecule activity	Pf00038	125113	ENSG00000264058.1; ENSG00000213424.8	KRT222	17			0	0.857	0.352	1.194	2.91	1.023	0.886139	4.71954e-05	0.920989	6.23261e-08	0.996231	18.74	12.75	19.21	118.43	27.64	123.8	106.1	43.5	126.7	27.39	19.23
FALSE	Low	Master Protein	A1L188	NADH dehydrogenase [ubiquinone] 1 alpha subcomplex assembly factor 8 OS=Homo sapiens OX=9606 GN=NDUFAF8 PE=1 SV=1	0.057	FALSE	1.769	18	1	1	1	1	74	7.8	9.32	0	1	cell organization and biogenesis	mitochondrion	protein binding		284184	ENSG00000224877.3	C17orf89; NDUFAF8	17			0	0.517	0.271	1.625	2.888	0.84	0.131672	0.00163981	0.713783	0.00124943	0.928597	34.43	1.54	119.94	52.11	14.51	152.3	78.7	40.9	128	10.93	96.82
FALSE	High	Master Protein	Q7Z6M1	Rab9 effector protein with kelch motifs OS=Homo sapiens OX=9606 GN=RABEPK PE=1 SV=1	0	FALSE	10.343	9	2	6	2	1	372	40.5	6.25	13.69	2	transport	cytoplasm;cytosol;endosome;membrane	protein binding	Pf01344, Pf07646, Pf13415, Pf13418, Pf13854, Pf13964	10244	ENSG00000136933.16	RABEPK	9			0	0.835	0.335	0.838	2.836	0.764	0.752218	7.14315e-14	0.464037	3.54689e-16	0.0993519	29.88	31.38	43.94	342.38	32.7	147.7	88.5	53.2	110.7	123.92	125.59
FALSE	High	Master Protein	Q9Y4C8	Probable RNA-binding protein 19 OS=Homo sapiens OX=9606 GN=RBM19 PE=1 SV=3	0.002	FALSE	4.875	1	1	3	1	1	960	107.3	6.54	7.32	1	development;regulation of biological process	chromosome;cytoplasm;membrane;nucleus	RNA binding	Pf00076, Pf08777, Pf13893, Pf14259	9904	ENSG00000122965.10	RBM19	12			0	1.811	0.316	0.504	2.806	0.801	0.01282	0.000658434	0.00300232	0.000546888	0.790855	18.19	13.75	6.64	121.95	22.44	108.9	173	30.9	87.2	13.34	10.84
FALSE	High	Master Protein	Q6N069	N-alpha-acetyltransferase 16, NatA auxiliary subunit OS=Homo sapiens OX=9606 GN=NAA16 PE=1 SV=2	0	FALSE	11.631	4	4	14	1	1	864	101.4	7.87	39.15	4	metabolic process;regulation of biological process	cytoplasm;cytosol;nucleus	catalytic activity;protein binding	Pf00515, Pf12569, Pf13414, Pf13432	79612	ENSG00000172766.18	NAA16	13			0	0.01	0.301	100	2.758	0.831	4.49643e-16	0.00591668	4.24865e-16	0.0025241	0.927293		0		0	0	187.6		56.5	155.9
FALSE	High	Master Protein	P19793	Retinoic acid receptor RXR-alpha OS=Homo sapiens OX=9606 GN=RXRA PE=1 SV=1	0	FALSE	23.624	14	5	10	2	1	462	50.8	7.8	20.55	5	cell differentiation;cell organization and biogenesis;cell proliferation;metabolic process;regulation of biological process;response to stimulus;transport	nucleus	DNA binding;metal ion binding;protein binding;receptor activity;signal transducer activity	Pf00104, Pf00105, Pf11825	6256	ENSG00000186350.9	RXRA	9	Bile secretion; PPAR signaling pathway; Non-small cell lung cancer; Pathways in cancer; Thyroid hormone signaling pathway; Transcriptional misregulation in cancer; Non-alcoholic fatty liver disease (NAFLD); Small cell lung cancer; Thyroid cancer; Hepatitis C; Adipocytokine signaling pathway; PI3K-Akt signaling pathway	Vitamin A and Carotenoid Metabolism; Nuclear Receptors; Transcription factor regulation in adipogenesis; PPAR Alpha Pathway; Farnesoid X Receptor Pathway; Liver X Receptor Pathway; Vitamin D Metabolism; Adipogenesis; PPAR signaling pathway; NRF2 pathway; Angiopoietin Like Protein 8 Regulatory Pathway; Constitutive Androstane Receptor Pathway; Energy Metabolism	0	0.919	0.875	1.072	2.749	1.072	0.982528	0.926462	0.999979	5.66256e-06	0.992073	23.19	73.82	26.61	92.36	35.81	104.2	106.6	91	98.1	15.7	32.89
FALSE	High	Master Protein	Q9Y448	Small kinetochore-associated protein OS=Homo sapiens OX=9606 GN=KNSTRN PE=1 SV=2	0	FALSE	10.191	9	2	2	2	1	316	35.4	6.3	5.82	2	cell division;cell organization and biogenesis;regulation of biological process	chromosome;cytoplasm;cytoskeleton;cytosol;nucleus	protein binding		90417	ENSG00000128944.13	C15orf23; KNSTRN	15			0	0.126	0.366	7.816	2.697	0.987	4.49643e-16	0.0221464	1.92144e-10	0.00111331	0.992073	0.69	9.43	61.11	107.96	20.29	161.3	20.4	59	159.3	17.35	133.33
FALSE	High	Master Protein	P46937	Transcriptional coactivator YAP1 OS=Homo sapiens OX=9606 GN=YAP1 PE=1 SV=2	0	FALSE	18.589	7	1	2	1	1	504	54.4	5.17	11.73	1	cell organization and biogenesis;cell proliferation;metabolic process;regulation of biological process;response to stimulus	cytoplasm;cytosol;nucleus	DNA binding;protein binding	Pf00397	10413	ENSG00000137693.13	YAP1	11	Hippo signaling pathway; Hippo signaling pathway -multiple species	Rac1/Pak1/p38/MMP-2 pathway; TGF-beta Signaling Pathway; miR-509-3p alteration of YAP1/ECM axis; Mesodermal Commitment Pathway	0	0.813	0.593	1.959	2.683	1.592	0.777376	0.08252	0.00185409	3.17153e-12	0.0385617	0	30.7	0	87.23	0	100.1	81.3	59.4	159.3
FALSE	High	Master Protein	Q86W42	THO complex subunit 6 homolog OS=Homo sapiens OX=9606 GN=THOC6 PE=1 SV=1	0.004	FALSE	4.081	3	1	1	1	1	341	37.5	7.43	2.21	1	cell death;development;metabolic process;regulation of biological process;transport	nucleus	protein binding;RNA binding	Pf00400	79228	ENSG00000131652.13	THOC6	16	RNA transport		0	1.011	0.707	1.866	2.667	1.886	0.976122	0.567201	0.027654	2.94509e-07	0.00743565	39.84	19.93	50.42	50.42	38.66	86.9	87.8	61.4	163.9	36.7
FALSE	High	Master Protein	Q6GMV3	Putative peptidyl-tRNA hydrolase PTRHD1 OS=Homo sapiens OX=9606 GN=PTRHD1 PE=1 SV=1	0	FALSE	13.996	21	1	3	1	1	140	15.8	9.1	18.32	1			catalytic activity		391356	ENSG00000184924.5	PTRHD1	2			0	0.99	0.44	1.18	2.654	1.168	0.987823	0.0785139	0.972282	0.00116995	0.961714	187.74	33.03	191.6	170.64	0	111.2	110.1	48.9	129.8		111.85
FALSE	Low	Master Protein	Q8NFB2	Transmembrane protein 185A OS=Homo sapiens OX=9606 GN=TMEM185A PE=1 SV=2	0.148	FALSE	1.071	8	1	2	1	1	350	40.6	7.24	0	1		membrane	protein binding	Pf10269	84548		TMEM185A	X			0	1.227	0.678	1.457	2.636	1.787	0.77093	0.768534	0.839895	0.00310906	0.366219	58.18	24.48	13.31	73.44	58.05	85.3	104.6	57.8	152.4	56.1	13.59
FALSE	High	Master Protein	P07093	Glia-derived nexin OS=Homo sapiens OX=9606 GN=SERPINE2 PE=1 SV=1	0	FALSE	60.131	26	8	18	8	1	398	44	9.29	61.2	8	cell differentiation;cell organization and biogenesis;coagulation;development;regulation of biological process;response to stimulus;transport	cytosol;extracellular	enzyme regulator activity;protein binding	Pf00079	5270	ENSG00000135919.12	SERPINE2	2			0	1.71	1.338	1.76	2.572	2.207	3.47406e-05	0.762849	3.24874e-05	3.54689e-16	3.14535e-09	95.44	6.8	121.23	104.25	76.32	19.4	130.1	29.5	220.9	3.61	120.59
FALSE	High	Master Protein	Q14004	Cyclin-dependent kinase 13 OS=Homo sapiens OX=9606 GN=CDK13 PE=1 SV=2	0	FALSE	21.294	4	4	22	2	1	1512	164.8	9.69	62.09	4	cell division;development;metabolic process;regulation of biological process;transport	chromosome;cytosol;extracellular;Golgi;nucleus	catalytic activity;DNA binding;nucleotide binding;protein binding;RNA binding	Pf00069, Pf07714	8621	ENSG00000065883.14	CDK13	7			0	100	100	1.384	2.523	100	4.49643e-16	3.59486e-16	0.661759	7.66473e-06	3.9087e-16			11.68	88.79			134.2	32.8	233		18.27
FALSE	High	Master Protein	O75911	Short-chain dehydrogenase/reductase 3 OS=Homo sapiens OX=9606 GN=DHRS3 PE=1 SV=2	0.004	FALSE	4.098	4	1	1	1	1	302	33.5	8.84	2.52	1	metabolic process;regulation of biological process	membrane	catalytic activity;nucleotide binding	Pf00106, Pf01370, Pf02719, Pf08659, Pf13561	9249	ENSG00000162496.8	DHRS3	1	Retinol metabolism; Metabolic pathways	Vitamin A and Carotenoid Metabolism	0	1.215	0.853	1.76	2.506	2.137	0.819354	0.925511	0.347053	0.0014984	0.0402991	37.97	32.51	49.35	58.1	39.33	76.8	93.4	65.5	164.3	36.26	44.67
FALSE	High	Master Protein	Q53EZ4	Centrosomal protein of 55 kDa OS=Homo sapiens OX=9606 GN=CEP55 PE=1 SV=3	0.001	FALSE	5.374	3	1	2	1	1	464	54.1	7.01	4.56	1	cell division;cell organization and biogenesis	cytoplasm;cytoskeleton;membrane	protein binding	Pf12180	55165	ENSG00000138180.15	CEP55	10			0	0.983	0.504	1.015	2.484	1.023	0.991136	0.134304	0.991683	0.00159259	0.997101	44.34	10.73	52.13	25.86	46.13	107	105.2	53.9	133.9	38.8	53.62
TRUE	High	Master Protein	P02533	Keratin, type I cytoskeletal 14 OS=Homo sapiens OX=9606 GN=KRT14 PE=1 SV=4	0	FALSE	56.4	18	11	52	1	1	472	51.5	5.16	118.36	11	cell death;cell differentiation;cell organization and biogenesis;response to stimulus	cytoplasm;cytosol;nucleus	protein binding;structural molecule activity	Pf00038, Pf13514	3861	ENSG00000186847.5	KRT14	17		Corticotropin-releasing hormone signaling pathway	0	100	100	2.14	2.442	100	4.49643e-16	3.59486e-16	0.24459	0.0145593	3.9087e-16			165.86	109.14			94.4	103.7	202
FALSE	High	Master Protein	P01033	Metalloproteinase inhibitor 1 OS=Homo sapiens OX=9606 GN=TIMP1 PE=1 SV=1	0	FALSE	42.161	48	6	19	6	1	207	23.2	8.1	65.82	6	cell organization and biogenesis;metabolic process;regulation of biological process;response to stimulus;transport	extracellular;organelle lumen	enzyme regulator activity;metal ion binding;protein binding	Pf00965	7076	ENSG00000102265.11	TIMP1	X	HIF-1 signaling pathway	IL1 and megakaryocytes in obesity; Matrix Metalloproteinases; IL-6 signaling pathway; Lung fibrosis	0	2.473	0.961	1.154	2.427	2.241	4.49643e-16	0.945903	0.903008	3.54689e-16	1.41396e-13	63.35	42.39	56.52	37.76	41.8	74.5	132.6	50.3	142.7	11.22	45.92
FALSE	High	Master Protein	Q9HBM1	Kinetochore protein Spc25 OS=Homo sapiens OX=9606 GN=SPC25 PE=1 SV=1	0.005	FALSE	3.73	5	1	1	1	1	224	26.1	8	2.66	1	cell division;cell organization and biogenesis;regulation of biological process	chromosome;cytosol;nucleus	protein binding	Pf08234, Pf10186	57405	ENSG00000152253.8; ENSG00000277909.4	SPC25	2; CHR_HSCHR2_1_CTG7_2			0	0.986	1.582	3.862	2.408	3.809	0.993175	0.363331	1.46828e-12	1.36803e-10	4.28628e-14	50.55	42.36	132.41	107.91	93.89	54.2	53.5	85.8	206.5	46.78
FALSE	High	Master Protein	Q9HA92	Radical S-adenosyl methionine domain-containing protein 1, mitochondrial OS=Homo sapiens OX=9606 GN=RSAD1 PE=2 SV=2	0.008	FALSE	3.373	2	1	1	1	1	442	48.7	7.78	1.77	1	metabolic process	cytoplasm;mitochondrion	catalytic activity;metal ion binding	Pf04055	55316	ENSG00000136444.9	RSAD1	17			0	1.395	0.752	1.286	2.385	1.794	0.502523	0.85145	0.911733	0.00775774	0.206977	12.23	34.47	12.23	60.94	0	81	112.9	60.9	145.2		11.62
FALSE	High	Master Protein	O00712	Nuclear factor 1 B-type OS=Homo sapiens OX=9606 GN=NFIB PE=1 SV=2	0.001	FALSE	6.762	8	2	6	2	1	420	47.4	8.87	9.11	2	cell differentiation;cell organization and biogenesis;cellular component movement;metabolic process;regulation of biological process	nucleus	DNA binding	Pf00859, Pf03165, Pf10524, Pf15362	4781	ENSG00000147862.15	NFIB	9		Pathways Affected in Adenoid Cystic Carcinoma	0	0.968	1.013	1.828	2.385	1.152	0.999259	0.999797	0.0287581	2.04804e-05	0.947609	96.54	84.73	65.92	84.37	18.32	129	67.8	57	146.2	12.29	88.37
FALSE	High	Master Protein	P51692	Signal transducer and activator of transcription 5B OS=Homo sapiens OX=9606 GN=STAT5B PE=1 SV=2	0.001	FALSE	5.368	2	1	1	1	1	787	89.8	6.05	2.81	1	cell differentiation;cellular component movement;metabolic process;regulation of biological process;response to stimulus;transport	cytoplasm;cytosol;nucleus	catalytic activity;DNA binding;protein binding;signal transducer activity	Pf00017, Pf01017, Pf02864, Pf02865	6777	ENSG00000173757.9	STAT5B	17	Viral carcinogenesis; Th1 and Th2 cell differentiation; Hepatitis B; Prolactin signaling pathway; Chronic myeloid leukemia; Acute myeloid leukemia; ErbB signaling pathway; Pathways in cancer; AGE-RAGE signaling pathway in diabetic complications; HTLV-I infection; Jak-STAT signaling pathway; Measles; Chemokine signaling pathway	EGF/EGFR Signaling Pathway; Kit receptor signaling pathway; Adipogenesis; IL-5 Signaling Pathway; Chemokine signaling pathway; IL-9 Signaling Pathway; Brain-Derived Neurotrophic Factor (BDNF) signaling pathway; AGE/RAGE pathway; Leptin signaling pathway; Endochondral Ossification; IL-4 Signaling Pathway; IL-3 Signaling Pathway; IL-7 Signaling Pathway; White fat cell differentiation; IL-2 Signalin…	0	1.21	0.582	1.146	2.385	1.387	0.823401	0.186267	0.972282	0.000163256	0.660881	76.61	8.64	66.61	46.89	39.51	95.7	115.8	55.7	132.8	23.99	73.94
FALSE	High	Master Protein	P11047	Laminin subunit gamma-1 OS=Homo sapiens OX=9606 GN=LAMC1 PE=1 SV=3	0	FALSE	34.412	8	7	9	7	1	1609	177.5	5.12	16.46	7	cell organization and biogenesis;cellular component movement;metabolic process;regulation of biological process	extracellular;organelle lumen	catalytic activity;motor activity;protein binding;structural molecule activity	Pf00052, Pf00053, Pf00055, Pf00261, Pf01576, Pf05262, Pf05483, Pf05557, Pf05667, Pf05701, Pf06008, Pf08317, Pf10174, Pf11068, Pf12128, Pf12795, Pf13166, Pf13514, Pf13868	3915	ENSG00000135862.5	LAMC1	1	Amoebiasis; Prion diseases; Pathways in cancer; Toxoplasmosis; Focal adhesion; Small cell lung cancer; ECM-receptor interaction; PI3K-Akt signaling pathway	Endoderm Differentiation; Focal Adhesion; miRNA targets in ECM and membrane receptors; Inflammatory Response Pathway; Alpha 6 Beta 4 signaling pathway; Focal Adhesion-PI3K-Akt-mTOR-signaling pathway	0	1.845	0.757	1.219	2.311	2.242	0.0186411	0.85145	0.886164	4.94145e-05	0.000414187	59.02	35.48	51.38	68.89	63.21	53.8	130.7	44.2	171.3	79.84	88.28
FALSE	High	Master Protein	P13645	Keratin, type I cytoskeletal 10 OS=Homo sapiens OX=9606 GN=KRT10 PE=1 SV=6	0	FALSE	158.819	45	19	44	16	1	584	58.8	5.21	103.71	19	cell death;cell differentiation;metabolic process	cytoplasm;cytoskeleton;cytosol;membrane;nucleus	structural molecule activity	Pf00038, Pf04111	3858	ENSG00000186395.7	KRT10	17	Staphylococcus aureus infection		2	0.893	1.215	1.671	2.296	2.969	0.941325	0.743499	0.0921378	2.31049e-14	3.9087e-16	56.31	91.55	97.38	108.15	112.62	135.7	31.7	167	65.6	66.29	106.96
FALSE	High	Master Protein	P17936	Insulin-like growth factor-binding protein 3 OS=Homo sapiens OX=9606 GN=IGFBP3 PE=1 SV=2	0.001	FALSE	6.755	13	2	2	2	1	291	31.7	8.69	2.57	2	cell death;cell differentiation;cell proliferation;metabolic process;regulation of biological process	extracellular;nucleus;organelle lumen	enzyme regulator activity;metal ion binding;protein binding	Pf00086, Pf00219	3486	ENSG00000146674.14	IGFBP3	7	Transcriptional misregulation in cancer; p53 signaling pathway	Senescence and Autophagy in Cancer; Photodynamic therapy-induced HIF-1 survival signaling; Myometrial Relaxation and Contraction Pathways	0	1.479	1.092	1.387	2.241	2.459	0.347752	0.981212	0.818916	0.00838416	0.00933286	61.21	26.9	44.83	46.22	54.7	52.3	117.6	88	142.2	15.56	21.17
TRUE	High	Master Protein	Q96F45	Zinc finger protein 503 OS=Homo sapiens OX=9606 GN=ZNF503 PE=1 SV=1	0.009	FALSE	3.3	3	1	2	1	1	646	62.5	8.7	0	1	cell proliferation;metabolic process;regulation of biological process	nucleus	metal ion binding	Pf12402	84858	ENSG00000165655.16	ZNF503	10			0	100	100	2.201	2.192	100	4.49643e-16	3.59486e-16	0.187569	0.0283309	3.9087e-16			0	98.39			95.1	95.5	209.4
FALSE	High	Master Protein	P35527	Keratin, type I cytoskeletal 9 OS=Homo sapiens OX=9606 GN=KRT9 PE=1 SV=3	0	FALSE	93.941	33	12	20	11	1	623	62	5.24	53.06	12	cell death;cell organization and biogenesis	cytosol;membrane;nucleus	structural molecule activity	Pf00038, Pf13166	3857	ENSG00000171403.9	KRT9	17			0	0.662	1.088	5.553	2.149	1.683	0.277191	0.976226	4.24865e-16	3.80873e-14	0.000258189	40.62	111.03	62.95	93.47	106.44	48.2	39.2	77.2	235.4	116.35	56.7
FALSE	High	Master Protein	P19447	General transcription and DNA repair factor IIH helicase subunit XPB OS=Homo sapiens OX=9606 GN=ERCC3 PE=1 SV=1	0	FALSE	7.859	3	1	1	1	1	782	89.2	7.23	3.59	1	cell death;cell differentiation;cell organization and biogenesis;metabolic process;regulation of biological process;response to stimulus	nucleus	catalytic activity;DNA binding;nucleotide binding;protein binding	Pf00271, Pf04851, Pf13625	2071	ENSG00000163161.12	ERCC3	2	Basal transcription factors; Nucleotide excision repair	Eukaryotic Transcription Initiation	0	0.932	0.329	0.755	2.135	0.728	0.989217	5.59444e-05	0.572372	0.00869892	0.566582	41.14	5.05	17.58	29.08	27.94	134.9	125.8	44.4	94.9	50.8	14.76
FALSE	High	Master Protein	P61018	Ras-related protein Rab-4B OS=Homo sapiens OX=9606 GN=RAB4B PE=1 SV=1	0	FALSE	29.524	29	4	27	2	1	213	23.6	6.06	84.72	4	regulation of biological process;response to stimulus;transport	endosome;membrane	catalytic activity;nucleotide binding;protein binding	Pf00009, Pf00025, Pf00071, Pf04670, Pf08477	53916	ENSG00000171570.10; ENSG00000167578.17	RAB4B	19			0	0.83	0.625	1.088	2.123	1.326	0.920198	0.55496	0.999979	0.027486	0.827611	14.34	9.17	54.52	27.91	41.31	100.9	132	63.1	104.1	49.4	54.67
FALSE	High	Master Protein	Q99828	Calcium and integrin-binding protein 1 OS=Homo sapiens OX=9606 GN=CIB1 PE=1 SV=4	0	FALSE	9.471	14	2	6	2	1	191	21.7	4.78	7.08	2	cell death;cell differentiation;cell division;cell organization and biogenesis;metabolic process;regulation of biological process;response to stimulus	cytoplasm;cytoskeleton;endoplasmic reticulum;Golgi;membrane;nucleus	enzyme regulator activity;metal ion binding;protein binding	Pf13499, Pf13833	10519	ENSG00000185043.10	CIB1	15			0	0.91	0.997	2.202	2.025	2.003	0.987056	0.996682	0.0584183	0.0275139	0.0812145	55.77	48.93	58.85	38.11	22.21	81.5	74.1	81.3	163.2	2.21	59.3
FALSE	High	Master Protein	O75896	Tumor suppressor candidate 2 OS=Homo sapiens OX=9606 GN=TUSC2 PE=1 SV=3	0.001	FALSE	5.463	25	1	2	1	1	110	12.1	9.69	4.99	1	cell communication;cell differentiation;cell proliferation;defense response;regulation of biological process;response to stimulus;transport	mitochondrion	protein binding	Pf15000	11334	ENSG00000114383.9	TUSC2	3			0	0.341	0.421	2.492	2.017	0.85	3.11986e-10	0.000244805	0.000236552	0.000673851	0.646423	12.61	9.59	82.57	41.13	31.89	153.2	52.2	64.5	130.1	4.07	85.09
FALSE	High	Master Protein	Q9H3K2	Growth hormone-inducible transmembrane protein OS=Homo sapiens OX=9606 GN=GHITM PE=1 SV=2	0	FALSE	26.667	15	4	22	4	1	345	37.2	9.94	28.22	4	cell death	membrane;mitochondrion	protein binding		27069	ENSG00000165678.20	GHITM	10			0	0.73	0.475	1.307	2.015	1.113	0.302162	3.14172e-05	0.623539	7.32371e-08	0.950085	30.94	8.27	45.45	62.38	42.05	86.3	117.2	94.2	102.4	63.21	32.65
FALSE	High	Master Protein	Q7L1V2	Vacuolar fusion protein MON1 homolog B OS=Homo sapiens OX=9606 GN=MON1B PE=1 SV=1	0.005	FALSE	3.742	3	1	1	1	1	547	59.2	6.29	2.93	1	metabolic process;transport	cytoplasm	protein binding	Pf03164	22879	ENSG00000103111.14	MON1B	16			0	0.747	0.473	1.26	1.99	0.941	0.771542	0.0155924	0.883316	0.00716984	0.961714	0	0	8.54	8.54	7.57	126.5	94.5	59.8	119.1
FALSE	High	Master Protein	Q02952	A-kinase anchor protein 12 OS=Homo sapiens OX=9606 GN=AKAP12 PE=1 SV=4	0.001	FALSE	6.901	1	1	1	1	1	1782	191.4	4.41	4.1	1	regulation of biological process;response to stimulus;transport	cytoplasm;cytoskeleton;cytosol;membrane	protein binding	Pf03832	9590	ENSG00000131016.16	AKAP12	6		G Protein Signaling Pathways	0	0.01	0.789	100	1.975	1.559	4.49643e-16	0.641793	4.24865e-16	1.13304e-07	0.029915		26.73		22.29	49.85	119.5		94.3	186.2	45.07
FALSE	High	Master Protein	P23443	Ribosomal protein S6 kinase beta-1 OS=Homo sapiens OX=9606 GN=RPS6KB1 PE=1 SV=2	0	FALSE	16.072	5	2	9	2	1	525	59.1	6.65	27.33	2	cell death;cellular component movement;defense response;metabolic process;regulation of biological process;response to stimulus	cell surface;cytoplasm;cytosol;membrane;mitochondrion;nucleus	catalytic activity;nucleotide binding;protein binding	Pf00069, Pf00433, Pf07714, Pf14531	6198	ENSG00000108443.13	RPS6KB1	17	Longevity regulating pathway - multiple species; TGF-beta signaling pathway; Insulin signaling pathway; HIF-1 signaling pathway; Acute myeloid leukemia; Breast cancer; ErbB signaling pathway; EGFR tyrosine kinase inhibitor resistance; Proteoglycans in cancer; Choline metabolism in cancer; AMPK signaling pathway; mTOR signaling pathway; Fc gamma R-mediated phagocytosis; Endocrine resistance; Insul…	Focal Adhesion-PI3K-Akt-mTOR-signaling pathway; Insulin Signaling; BDNF-TrkB Signaling; EGF/EGFR Signaling Pathway; AMP-activated Protein Kinase (AMPK) Signaling; IL-6 signaling pathway; VEGFA-VEGFR2 Signaling Pathway; IL-5 Signaling Pathway; Brain-Derived Neurotrophic Factor (BDNF) signaling pathway; Prolactin Signaling Pathway; Leptin signaling pathway; ErbB Signaling Pathway; G13 Signaling Pat…	0	0.599	0.435	1.509	1.966	0.692	0.0149252	0.00429447	0.26001	0.00329549	0.270655	24.17	9.13	30.45	69.24	38.93	91.1	156.6	70	82.3	81.87	85.75
FALSE	Medium	Master Protein	P51825	AF4/FMR2 family member 1 OS=Homo sapiens OX=9606 GN=AFF1 PE=1 SV=1	0.02	FALSE	2.615	1	1	1	1	1	1210	131.3	9.2	1.99	1	regulation of biological process	nucleus	protein binding	Pf05110	4299	ENSG00000172493.20	AFF1	4	Transcriptional misregulation in cancer		0	0.763	0.414	1.033	1.957	0.789	0.65567	0.000831009	0.998862	0.00318168	0.550365	10.76	1.49	14.21	9.61	11.5	133	104.3	55.1	107.7	8.27	45.15
FALSE	High	None	P36959	GMP reductase 1 OS=Homo sapiens OX=9606 GN=GMPR PE=1 SV=1	0.001	FALSE	7.534	3	2	9	2	1	345	37.4	7.06	14.33	2	metabolic process;response to stimulus	cytosol	catalytic activity;metal ion binding	Pf00478, Pf01645	2766	ENSG00000137198.9	GMPR	6	Purine metabolism		0	0.783	0.747	1.114	1.956	0.896	0.864619	0.836561	0.997247	0.00379249	0.933074	12.67	51.14	75.03	93.96	51.67	63.5	56.6	18.9	261	109.41	107.23
FALSE	High	Master Protein	Q9UBQ6	Exostosin-like 2 OS=Homo sapiens OX=9606 GN=EXTL2 PE=1 SV=1	0.004	FALSE	3.942	6	1	1	1	1	330	37.4	8.95	2.66	1	metabolic process	endoplasmic reticulum;extracellular;membrane	catalytic activity;metal ion binding	Pf09258	2135	ENSG00000162694.13	EXTL2	1	Glycosaminoglycan biosynthesis - heparan sulfate / heparin; Metabolic pathways		0	1.04	0.874	1.637	1.948	1.703	0.951846	0.891593	0.0646376	1.90081e-06	0.0102672	0	0	0	0	0	86.6	90.1	75.7	147.5
FALSE	High	Master Protein	P56211	cAMP-regulated phosphoprotein 19 OS=Homo sapiens OX=9606 GN=ARPP19 PE=1 SV=2	0	FALSE	19.804	48	5	20	4	1	112	12.3	9.09	30.98	5	cell division;regulation of biological process	cytoplasm	enzyme regulator activity;protein binding	Pf04667	10776	ENSG00000128989.10	ARPP19	15			0	1.734	0.967	1.58	1.948	2.364	0.00122845	0.961031	0.0920304	4.37328e-07	3.85518e-08	108.22	66.95	37.36	89.55	94.63	91.7	91.3	67.3	149.7	25.66	53.69
FALSE	High	Master Protein	P46100	Transcriptional regulator ATRX OS=Homo sapiens OX=9606 GN=ATRX PE=1 SV=5	0	FALSE	20.38	2	3	6	3	1	2492	282.4	6.58	14.84	3	cell organization and biogenesis;metabolic process;regulation of biological process;response to stimulus	chromosome;nucleus	catalytic activity;DNA binding;metal ion binding;nucleotide binding;protein binding	Pf00176, Pf00271	546		ATRX	X		Pathways Affected in Adenoid Cystic Carcinoma	0	0.775	0.968	2.128	1.939	1.941	0.857913	0.989567	0.0454571	0.0202047	0.0736994	44.62	63.9	34.52	75.41	47.35	59.3	73.9	101.8	165.1	58.66	74.82
FALSE	High	Master Protein	Q9BWT1	Cell division cycle-associated protein 7 OS=Homo sapiens OX=9606 GN=CDCA7 PE=1 SV=1	0.01	FALSE	3.206	6	1	1	1	1	371	42.5	9.45	0	1	cell death;metabolic process;regulation of biological process	cytoplasm;cytosol;nucleus		Pf10497	83879	ENSG00000144354.13	CDCA7	2			0	0.01	0.592	100	1.929	1.106	4.49643e-16	0.189752	4.24865e-16	0.00469885	0.962734		5.03		22.8	34.22	142.5		84.4	173.1	14.63
FALSE	High	Master Protein	Q9NRP2	COX assembly mitochondrial protein 2 homolog OS=Homo sapiens OX=9606 GN=CMC2 PE=1 SV=1	0.001	FALSE	5.191	28	1	4	1	1	79	9.5	7.87	0	1		mitochondrion		Pf08583	56942	ENSG00000103121.8	CMC2	16			0		100	100	1.922	100		3.59486e-16	4.24865e-16	0.125567	3.9087e-16				0				136.9	263.1
TRUE	High	Master Protein	Q9UK53	Inhibitor of growth protein 1 OS=Homo sapiens OX=9606 GN=ING1 PE=1 SV=2	0.001	FALSE	5.743	3	1	1	1	1	422	46.7	9.06	3.67	1	regulation of biological process	nucleus	metal ion binding;protein binding	Pf00628, Pf12998	3621		ING1	13		Senescence and Autophagy in Cancer	0	3.241	5.447	3.217	1.914	10.427	4.79638e-06	1.76186e-06	1.89913e-05	0.00459257	3.9087e-16	196.49	243.62	32.12	0	243.62	19.9	64.4	108.3	207.4	120.81	29.94
FALSE	High	Master Protein Candidate	Q13070	G antigen 6 OS=Homo sapiens OX=9606 GN=GAGE6 PE=1 SV=1	0	FALSE	13.209	30	1	7	1	1	117	12.9	4.25	20.26	1				Pf05831	2578		GAGE6	X			0	1.134	1.182	1.472	1.913	1.658	0.823401	0.920809	0.303361	7.25811e-06	0.0197926	62.05	106.71	83.27	93.31	73.35	68	88.2	80.3	163.5	58.86	55.12
FALSE	High	Master Protein	Q13069	G antigen 5 OS=Homo sapiens OX=9606 GN=GAGE5 PE=1 SV=1	0	FALSE	13.209	30	1	7	1	1	117	12.9	4.25	20.26	1			protein binding	Pf05831	2577; 2576		GAGE5; GAGE4	X			0	1.134	1.182	1.472	1.913	1.658	0.823401	0.920809	0.303361	7.25811e-06	0.0197926	62.05	106.71	83.27	93.31	73.35	68	88.2	80.3	163.5	58.86	55.12
FALSE	High	Master Protein	Q14191	Werner syndrome ATP-dependent helicase OS=Homo sapiens OX=9606 GN=WRN PE=1 SV=2	0.005	FALSE	3.827	1	1	1	1	1	1432	162.4	6.34	2.72	1	cell communication;cell organization and biogenesis;metabolic process;regulation of biological process;response to stimulus;transport	cytoplasm;nucleus	catalytic activity;DNA binding;metal ion binding;nucleotide binding;protein binding	Pf00270, Pf00271, Pf00570, Pf01612, Pf09382, Pf14493	7486	ENSG00000165392.9	WRN	8			0	0.883	0.725	1.553	1.892	1.372	0.98003	0.833852	0.721001	0.122379	0.818219	0	33.77	0	64.28	0	100.5	88.8	72.9	137.9
FALSE	High	Master Protein	Q96ES7	SAGA-associated factor 29 OS=Homo sapiens OX=9606 GN=SGF29 PE=1 SV=1	0.001	FALSE	5.615	4	1	2	1	1	293	33.2	8.1	6.01	1	cell organization and biogenesis;metabolic process;regulation of biological process	nucleus	protein binding	Pf07039	112869	ENSG00000176476.8	CCDC101; SGF29	16			0	0.443	0.613	2.437	1.88	1.153	0.0143192	0.522574	0.0199696	0.0617258	0.966313	10.87	24.31	65.68	60.58	35.38	124.8	54.8	76.5	143.9	32.21	73.22
FALSE	Low	None	O14967	Calmegin OS=Homo sapiens OX=9606 GN=CLGN PE=1 SV=1	0.066	FALSE	1.648	1	1	11	1	1	610	70	4.69	17.77	1	cell organization and biogenesis;metabolic process	endoplasmic reticulum;membrane	metal ion binding;protein binding	Pf00262	1047	ENSG00000153132.12	CLGN	4			0	0.997	0.749	0.991	1.873	0.901	0.957458	0.165468	0.886164	3.80873e-14	0.680688	43.39	80.17	64.63	89.78	66.98	96.3	96.6	72.1	135	48.51	42.56
FALSE	High	Master Protein	Q02818	Nucleobindin-1 OS=Homo sapiens OX=9606 GN=NUCB1 PE=1 SV=4	0	FALSE	58.268	24	8	15	8	1	461	53.8	5.25	57.41	8	metabolic process;regulation of biological process;response to stimulus	cytoplasm;endoplasmic reticulum;endosome;extracellular;Golgi;membrane;nucleus;organelle lumen	DNA binding;metal ion binding;protein binding		4924	ENSG00000104805.15	NUCB1	19			0	0.856	1.89	3.719	1.86	3.352	0.953859	0.11977	2.73371e-10	3.89681e-05	2.17983e-10	21.12	62.88	112.74	106.2	135.36	19.2	27.7	151.7	201.4	137.81	136.38
FALSE	High	Master Protein	Q9Y4D1	Disheveled-associated activator of morphogenesis 1 OS=Homo sapiens OX=9606 GN=DAAM1 PE=1 SV=2	0	FALSE	16.645	5	3	7	3	1	1078	123.4	7.23	11.9	3	cell organization and biogenesis;regulation of biological process;response to stimulus	cytoplasm;cytoskeleton;cytosol;membrane	protein binding	Pf02181, Pf06367, Pf06371	23002	ENSG00000100592.15	DAAM1	14	Wnt signaling pathway	Association Between Physico-Chemical Features and Toxicity Associated Pathways	0	1.056	0.841	1.126	1.859	1.29	0.957458	0.929598	0.995898	0.0320734	0.852097	55.08	14.23	103.49	48.18	61.09	83.1	117.2	42.5	157.3	68.15	89.91
FALSE	High	None	Q8N4C6	Ninein OS=Homo sapiens OX=9606 GN=NIN PE=1 SV=4	0.001	FALSE	5.165	0	1	7	1	1	2090	243.1	5.03	12.83	1	cell organization and biogenesis;metabolic process	cytoplasm;cytoskeleton;nucleus	metal ion binding;nucleotide binding;protein binding	Pf04111, Pf09731, Pf13166	51199	ENSG00000100503.23	NIN	14			0	1.008	1.562	1.245	1.849	1.255	0.968824	0.152004	0.816375	0.00442527	0.61414	118.93	134.53	85.41	135.8	116.66	177.7	88.8	29.3	104.2	85.28	76.99
FALSE	High	None	Q92901	60S ribosomal protein L3-like OS=Homo sapiens OX=9606 GN=RPL3L PE=2 SV=3	0	FALSE	11.749	3	1	11	1	1	407	46.3	10.45	34.29	1	cell organization and biogenesis;metabolic process	membrane;ribosome	RNA binding;structural molecule activity	Pf00297	6123	ENSG00000140986.7	RPL3L	16	Ribosome	Cytoplasmic Ribosomal Proteins	0	0.812	0.606	1.354	1.847	1.119	0.435163	0.000821967	0.180444	8.79e-11	0.907767	92.35	54.34	127.9	127.9	127.9	112.6	93.1	68.2	126	90.82	93.94
FALSE	High	Master Protein	O95602	DNA-directed RNA polymerase I subunit RPA1 OS=Homo sapiens OX=9606 GN=POLR1A PE=1 SV=2	0	FALSE	16.544	5	4	5	4	1	1720	194.7	7.03	9.3	4	metabolic process;regulation of biological process	nucleus	catalytic activity;DNA binding;metal ion binding;protein binding	Pf00623, Pf04983, Pf04997, Pf04998, Pf05000	25885	ENSG00000068654.15	POLR1A	2	Purine metabolism; RNA polymerase; Metabolic pathways; Pyrimidine metabolism	Eukaryotic Transcription Initiation	0	1.296	0.531	1.028	1.835	1.332	0.672177	0.0849039	0.998862	0.0748943	0.794895	58.21	20.37	55.29	58.76	37.61	125.1	151.1	35.3	88.5	65.76	52.35
FALSE	Medium	None	Q9Y3E1	Hepatoma-derived growth factor-related protein 3 OS=Homo sapiens OX=9606 GN=HDGFL3 PE=1 SV=1	0.026	FALSE	2.459	4	1	4	0	3	203	22.6	7.99	3.38	1	cell organization and biogenesis;cell proliferation;regulation of biological process	cytoplasm;cytosol;extracellular;nucleus	protein binding	Pf00855	50810	ENSG00000166503.8	HDGFRP3; HDGFL3	15			0	16.188	6.244	1.542	1.828	33.339	4.49643e-16	8.28986e-08	0.309839	0.0132664	3.9087e-16	142.32	146.64	53.73	95.9	143.81	5.4	116.6	98.3	179.7	163.01	68.54
FALSE	Medium	None	P02008	Hemoglobin subunit zeta OS=Homo sapiens OX=9606 GN=HBZ PE=1 SV=2	0.013	FALSE	2.926	5	1	3	1	1	142	15.6	8.21	3.79	1	regulation of biological process;transport		metal ion binding;protein binding;transporter activity	Pf00042	3050	ENSG00000130656.4	HBZ	16			0	0.589	0.571	1.741	1.795	1.026	0.273493	0.16836	0.244288	0.0532373	0.997101	0	56.18	0	172.16	0	125.6	73.9	71.7	128.8
FALSE	High	Master Protein	Q8WV24	Pleckstrin homology-like domain family A member 1 OS=Homo sapiens OX=9606 GN=PHLDA1 PE=1 SV=4	0.001	FALSE	5.231	2	2	8	2	1	401	45	9.89	21.06	2	cell death;metabolic process	cytoplasm;cytosol;nucleus	protein binding		22822	ENSG00000139289.13	PHLDA1	12			0	1.403	0.501	0.639	1.787	0.896	0.495444	0.177328	0.23745	0.168949	0.939279	5.24	41.84	2.17	169.06	2.53	105.3	147.7	52.8	94.3	3.02	5.1
FALSE	High	Master Protein	P80188	Neutrophil gelatinase-associated lipocalin OS=Homo sapiens OX=9606 GN=LCN2 PE=1 SV=2	0	FALSE	30.138	41	5	19	5	1	198	22.6	8.91	36.77	5	cell communication;cell death;cell organization and biogenesis;cellular homeostasis;defense response;regulation of biological process;response to stimulus;transport	cytosol;extracellular;organelle lumen	metal ion binding;protein binding;transporter activity	Pf00061	3934	ENSG00000148346.11	LCN2	9			0	0.98	0.64	0.967	1.784	0.882	0.991136	0.0095608	0.91175	3.34399e-05	0.710437	70.59	18.59	54.45	70.61	55.79	149.3	114.1	47.8	88.8	78.01	92.21
FALSE	High	None	P27216	Annexin A13 OS=Homo sapiens OX=9606 GN=ANXA13 PE=1 SV=3	0.004	FALSE	3.874	3	1	4	1	1	316	35.4	5.6	8.34	1	cell differentiation;regulation of biological process	membrane	metal ion binding	Pf00191	312	ENSG00000104537.16	ANXA13	8			0	0.981	1.137	1.331	1.778	1.306	0.987056	0.974896	0.901511	0.184538	0.875273	90.83	98.63	89.7	117.19	128.03	108.8	106.7	42.4	142.1	125.71	113.93
FALSE	High	Master Protein	O14933	Ubiquitin/ISG15-conjugating enzyme E2 L6 OS=Homo sapiens OX=9606 GN=UBE2L6 PE=1 SV=4	0.006	FALSE	3.623	10	1	2	1	1	153	17.8	7.88	2.73	1	metabolic process;regulation of biological process;response to stimulus	cytosol	catalytic activity;protein binding	Pf00179	9246	ENSG00000156587.15	UBE2L6	11	Ubiquitin mediated proteolysis; Parkinson's disease	Parkin-Ubiquitin Proteasomal System pathway; Parkinsons Disease Pathway	0	1.216	0.981	1.766	1.764	1.731	0.823401	0.988183	0.120746	0.0272226	0.165331	54.11	28.49	7.71	29.01	35.22	85.5	82.6	83.9	148	33.48	49.31
FALSE	High	Master Protein	Q9H3M7	Thioredoxin-interacting protein OS=Homo sapiens OX=9606 GN=TXNIP PE=1 SV=1	0	FALSE	25.291	20	5	19	5	1	391	43.6	7.5	47.14	5	cell differentiation;metabolic process;regulation of biological process;response to stimulus;transport	cytoplasm;cytosol;nucleus	enzyme regulator activity;protein binding	Pf00339, Pf02752	10628	ENSG00000265972.5	TXNIP; LOC101060503	1	NOD-like receptor signaling pathway	VEGFA-VEGFR2 Signaling Pathway	0	1.715	1.109	1.139	1.763	2.011	4.05264e-08	0.935091	0.922831	2.32034e-10	9.03306e-07	45.91	28.84	34.94	26.77	20.17	55.3	122.6	71.3	150.8	62.91	76.01
FALSE	Low	None	Q9UPT6	C-Jun-amino-terminal kinase-interacting protein 3 OS=Homo sapiens OX=9606 GN=MAPK8IP3 PE=1 SV=3	0.05	FALSE	1.937	1	1	1	1	1	1336	147.4	5.4	1.85	1	cellular component movement;metabolic process;regulation of biological process;transport	cytoplasm;extracellular;membrane	catalytic activity;motor activity;protein binding;structural molecule activity	Pf00038, Pf01576, Pf02463, Pf03938, Pf04111, Pf04156, Pf05701, Pf05769, Pf05887, Pf07174, Pf07926, Pf09728, Pf09731, Pf09744, Pf09756, Pf10037, Pf12037, Pf13851, Pf13863, Pf13868, Pf15035	23162	ENSG00000138834.12	MAPK8IP3	16	MAPK signaling pathway	MAPK Signaling Pathway	0	1.152	0.971	1.482	1.758	1.708	0.865976	0.979076	0.709228	0.168949	0.277815	0	0	32.66	32.66	32.66	82.8	95.4	80.4	141.4
FALSE	High	Master Protein	Q9NYM9	BET1-like protein OS=Homo sapiens OX=9606 GN=BET1L PE=1 SV=1	0	FALSE	12.257	32	2	2	2	1	111	12.4	8.16	6.48	2	cell organization and biogenesis;regulation of biological process;transport	cytosol;endosome;Golgi;membrane	protein binding	Pf05739	51272	ENSG00000177951.17	BET1L	11	SNARE interactions in vesicular transport		0	1.897	0.646	0.596	1.752	1.132	0.0383988	0.655715	0.179334	0.175998	0.968988	46.33	26.31	12.59	40.81	48.06	85.6	162.3	55.3	96.8	55.36	42.29
FALSE	High	Master Protein	P40306	Proteasome subunit beta type-10 OS=Homo sapiens OX=9606 GN=PSMB10 PE=1 SV=1	0	FALSE	12.97	19	2	10	2	1	273	28.9	7.81	30	2	metabolic process;regulation of biological process;response to stimulus;transport	cytoplasm;cytosol;nucleus;proteasome	catalytic activity;protein binding	Pf00227, Pf12465	5699	ENSG00000205220.11	PSMB10	16	Proteasome	Proteasome Degradation	0	1.084	0.555	1.478	1.746	1.367	0.944303	0.123034	0.497427	0.0361834	0.600047	112.18	38.49	54.55	86.67	99.97	80.7	110.8	44.8	163.7	61.43	77.09
FALSE	High	Master Protein	O95059	Ribonuclease P protein subunit p14 OS=Homo sapiens OX=9606 GN=RPP14 PE=1 SV=3	0	FALSE	8.954	16	1	2	1	1	124	13.7	7.75	8.86	1	metabolic process	nucleus	catalytic activity;RNA binding	Pf01900	11102	ENSG00000163684.11	RPP14	3	RNA transport		0	0.631	0.717	2.868	1.743	1.344	0.413635	0.677766	0.000579922	0.0418081	0.767238	36.26	5.91	90.63	61.22	21	108.3	68.4	77.7	145.6	2.76	63.13
FALSE	Medium	Master Protein	Q9BQD3	KxDL motif-containing protein 1 OS=Homo sapiens OX=9606 GN=KXD1 PE=1 SV=2	0.046	FALSE	2.008	9	1	4	1	1	176	19.7	4.89	0	1	transport	membrane;vacuole	protein binding	Pf10241	79036	ENSG00000105700.10	KXD1	19			0	0.823	0.664	1.063	1.741	0.885	0.778188	0.116642	0.999979	0.000208758	0.757612	35.46	14.7	11.23	14.08	35.5	101.7	113.3	67.5	117.5	29.1	29.01
FALSE	High	Master Protein	Q9Y5U8	Mitochondrial pyruvate carrier 1 OS=Homo sapiens OX=9606 GN=MPC1 PE=1 SV=1	0	FALSE	20.625	43	2	10	2	1	109	12.3	9.61	32.74	2	metabolic process;transport	membrane;mitochondrion	catalytic activity;transporter activity	Pf01483, Pf03650	51660	ENSG00000060762.18	MPC1	6		Glycolysis and Gluconeogenesis	0	0.926	0.573	0.955	1.741	0.998	0.98003	0.168458	0.943982	0.116762	0.992073	56.59	19.8	78.09	56.36	78.49	99.9	161	57	82.1	82.88	78.67
FALSE	High	Master Protein	P00519	Tyrosine-protein kinase ABL1 OS=Homo sapiens OX=9606 GN=ABL1 PE=1 SV=4	0.002	FALSE	4.384	1	1	1	1	1	1130	122.8	8.66	2.76	1	cell death;cell differentiation;cell growth;cell organization and biogenesis;cell proliferation;cellular component movement;cellular homeostasis;defense response;metabolic process;regulation of biological process;response to stimulus;transport	cytoplasm;cytoskeleton;cytosol;membrane;mitochondrion;nucleus	catalytic activity;DNA binding;metal ion binding;nucleotide binding;protein binding	Pf00017, Pf00018, Pf00069, Pf07653, Pf07714, Pf08919, Pf14604	25	ENSG00000097007.17	ABL1	9	Pathogenic Escherichia coli infection; MicroRNAs in cancer; Chronic myeloid leukemia; Neurotrophin signaling pathway; ErbB signaling pathway; Pathways in cancer; Viral myocarditis; Ras signaling pathway; Cell cycle; Axon guidance; Shigellosis	Regulation of Microtubule Cytoskeleton; miRNA Regulation of DNA Damage Response; DNA Damage Response; Retinoblastoma (RB) in Cancer; TP53 Network; ErbB Signaling Pathway; Cell Cycle; ATM Signaling Pathway; Integrated Breast Cancer Pathway; DNA Damage Response (only ATM dependent); Apoptosis-related network due to altered Notch3 in ovarian cancer; Pathogenic Escherichia coli infection; miRNAs invo…	0	0.925	0.981	1.195	1.74	1.168	0.989869	0.98884	0.969916	0.193086	0.961714	49.62	10.07	67.54	98.49	64.75	86.7	80.2	85.1	148	54.21	81.36
FALSE	High	Master Protein	Q9BTE1	Dynactin subunit 5 OS=Homo sapiens OX=9606 GN=DCTN5 PE=1 SV=1	0.001	FALSE	5.874	5	1	1	1	1	182	20.1	8.02	3.72	1	transport	chromosome;cytoplasm;cytoskeleton;cytosol;membrane	protein binding	Pf00132	84516	ENSG00000166847.9	DCTN5	16	Vasopressin-regulated water reabsorption		0	0.01	0.015	100	1.736	0.027	4.49643e-16	3.59486e-16	4.24865e-16	0.274788	3.9087e-16		0		0	0	383.9		5.9	10.2
FALSE	High	Master Protein	P63098	Calcineurin subunit B type 1 OS=Homo sapiens OX=9606 GN=PPP3R1 PE=1 SV=2	0	FALSE	27.838	33	4	7	4	1	170	19.3	4.81	18.85	4	metabolic process;regulation of biological process;response to stimulus	cytoplasm;cytosol;membrane;mitochondrion	catalytic activity;metal ion binding;protein binding	Pf00036, Pf12763, Pf13405, Pf13499, Pf13833	5534	ENSG00000221823.10	PPP3R1	2	Th1 and Th2 cell differentiation; T cell receptor signaling pathway; Osteoclast differentiation; Glutamatergic synapse; Amphetamine addiction; cGMP-PKG signaling pathway; Renin secretion; B cell receptor signaling pathway; VEGF signaling pathway; MAPK signaling pathway; Oxytocin signaling pathway; Natural killer cell mediated cytotoxicity; Long-term potentiation; Tuberculosis; Glucagon signaling …	Alzheimers Disease; Energy Metabolism; Initiation of transcription and translation elongation at the HIV-1 LTR; TFs Regulate miRNAs related to cardiac hypertrophy; MAPK Signaling Pathway	0	0.707	0.348	1.748	1.733	1.012	0.231716	7.4547e-09	0.0537416	0.00206945	0.987452	29.57	7.78	35.32	71.7	53.31	133.9	75.7	95.5	94.9	46.98	54.27
FALSE	Low	Master Protein	Q9Y2R2	Tyrosine-protein phosphatase non-receptor type 22 OS=Homo sapiens OX=9606 GN=PTPN22 PE=1 SV=2	0.081	FALSE	1.504	1	1	1	1	1	807	91.6	7.59	0	1	cell differentiation;metabolic process;regulation of biological process;response to stimulus	cytoplasm;cytosol;nucleus	catalytic activity;protein binding	Pf00102	26191		PTPN22	1			0	1.03	0.599	0.796	1.715	1.028	0.97502	0.552568	0.751058	0.233744	0.999858	43.06	16.06	11.54	20.96	44.69	120.7	124.3	56.1	98.9	34.5	6.51
FALSE	High	Master Protein	Q9NRX4	14 kDa phosphohistidine phosphatase OS=Homo sapiens OX=9606 GN=PHPT1 PE=1 SV=1	0	FALSE	42.803	38	3	34	3	1	125	13.8	6.07	121.88	3	metabolic process;regulation of biological process	cytoplasm;cytosol	catalytic activity;protein binding	Pf05005	29085	ENSG00000054148.17	PHPT1	9			0	1.015	0.593	1.064	1.712	1.16	0.916766	0.000568757	0.999979	1.47135e-07	0.835913	72.28	37.14	87.45	75.54	79.36	92	109.4	68.1	130.4	48.26	28.56
TRUE	High	Master Protein	Q99547	M-phase phosphoprotein 6 OS=Homo sapiens OX=9606 GN=MPHOSPH6 PE=1 SV=2	0.005	FALSE	3.781	9	1	1	1	1	160	19	5.2	2.21	1	metabolic process	cytoplasm;nucleus	protein binding;RNA binding	Pf10175	10200	ENSG00000135698.9	MPHOSPH6	16	RNA degradation		0	2.205	0.565	0.439	1.71	0.967	0.000775342	0.234465	0.000266057	0.150457	0.981508	164.26	23.72	0	130.68	153.62	84.4	186.2	47.7	81.7	104.98
FALSE	High	Master Protein	Q5TGZ0	MICOS complex subunit MIC10 OS=Homo sapiens OX=9606 GN=MINOS1 PE=1 SV=1	0	FALSE	15.083	51	2	11	2	1	78	8.8	8.5	15.04	2		membrane;mitochondrion	protein binding	Pf04418	440574	ENSG00000173436.13	MINOS1	1			0	0.966	0.92	1.153	1.699	1.108	0.999259	0.953754	0.961921	0.00458649	0.968988	119.42	56.61	107.53	63.52	56.09	118.2	72.3	57.5	151.9	43.55	106.11
FALSE	High	Master Protein	Q9H0G5	Nuclear speckle splicing regulatory protein 1 OS=Homo sapiens OX=9606 GN=NSRP1 PE=1 SV=1	0	FALSE	14.669	12	3	7	3	1	558	66.4	8.84	20.63	3	metabolic process;regulation of biological process;transport	nucleus	protein binding;RNA binding	Pf09745	84081	ENSG00000126653.17	NSRP1	17			0	1.256	1.055	1.232	1.693	1.603	0.427308	0.998872	0.829595	0.000602407	0.0455004	58.41	56.54	37.56	74.74	71.62	88.4	114.3	53.7	143.6	19.38	34.96
FALSE	Low	Master Protein Candidate	P19875	C-X-C motif chemokine 2 OS=Homo sapiens OX=9606 GN=CXCL2 PE=1 SV=1	0.133	FALSE	1.139	15	1	1	1	1	107	11.4	10.55	0	1	cellular component movement;defense response;regulation of biological process;response to stimulus	extracellular	protein binding	Pf00048	2920	ENSG00000081041.8	CXCL2	4	TNF signaling pathway; NOD-like receptor signaling pathway; Cytokine-cytokine receptor interaction; NF-kappa B signaling pathway; Salmonella infection; Chemokine signaling pathway; Legionellosis	Cytokines and Inflammatory Response; Lung fibrosis; Photodynamic therapy-induced NF-kB survival signaling; Spinal Cord Injury	0	0.968	0.905	1.577	1.688	1.527	0.993866	0.962994	0.589247	0.163025	0.542715	169.51	0	124.69	56.3	56.3	90.9	88	82.2	138.8		109.34
FALSE	Low	Master Protein	P09341	Growth-regulated alpha protein OS=Homo sapiens OX=9606 GN=CXCL1 PE=1 SV=1	0.133	FALSE	1.139	15	1	1	1	1	107	11.3	10.43	0	1	cell organization and biogenesis;cell proliferation;cellular component movement;defense response;regulation of biological process;response to stimulus;transport	extracellular;organelle lumen	enzyme regulator activity;protein binding	Pf00048	2919	ENSG00000163739.4	CXCL1	4	Amoebiasis; TNF signaling pathway; NOD-like receptor signaling pathway; Cytokine-cytokine receptor interaction; Salmonella infection; Epithelial cell signaling in Helicobacter pylori infection; Chemokine signaling pathway; Legionellosis; Rheumatoid arthritis	Spinal Cord Injury; Cytokines and Inflammatory Response; Senescence and Autophagy in Cancer	0	0.968	0.905	1.577	1.688	1.527	0.993866	0.962994	0.589247	0.163025	0.542715	169.51	0	124.69	56.3	56.3	90.9	88	82.2	138.8		109.34
FALSE	Low	Master Protein Candidate	P19876	C-X-C motif chemokine 3 OS=Homo sapiens OX=9606 GN=CXCL3 PE=1 SV=1	0.133	FALSE	1.139	15	1	1	1	1	107	11.3	10.37	0	1	cellular component movement;defense response;regulation of biological process;response to stimulus	extracellular	protein binding	Pf00048	2921	ENSG00000163734.4	CXCL3	4	TNF signaling pathway; NOD-like receptor signaling pathway; Cytokine-cytokine receptor interaction; Salmonella infection; Chemokine signaling pathway; Legionellosis	Chemokine signaling pathway	0	0.968	0.905	1.577	1.688	1.527	0.993866	0.962994	0.589247	0.163025	0.542715	169.51	0	124.69	56.3	56.3	90.9	88	82.2	138.8		109.34
FALSE	High	Master Protein	Q9NXG6	Transmembrane prolyl 4-hydroxylase OS=Homo sapiens OX=9606 GN=P4HTM PE=1 SV=2	0	FALSE	31.25	17	5	14	5	1	502	56.6	6.06	45.79	5	metabolic process;regulation of biological process	endoplasmic reticulum;membrane	catalytic activity;metal ion binding	Pf13499	54681	ENSG00000178467.17	P4HTM	3			0	1.447	1.032	1.158	1.686	1.776	0.000346991	0.997752	0.883316	3.94504e-07	0.000251626	78.61	48.9	81.2	46.53	47.24	76.8	102.2	86.2	134.8	34.78	26.79
FALSE	Low	None	Q96KX1	Uncharacterized protein C4orf36 OS=Homo sapiens OX=9606 GN=C4orf36 PE=4 SV=2	0.052	FALSE	1.869	6	1	8	1	1	117	13.3	9.47	15.25	1				Pf15022	132989	ENSG00000163633.10	C4orf36	4			0	0.967	0.799	1.251	1.684	1.24	0.999488	0.772715	0.864938	0.00858134	0.806466	23.87	19.62	25.54	38.1	23.58	104.1	100.6	86.8	108.6	15.09	20.28
FALSE	High	Master Protein	Q15059	Bromodomain-containing protein 3 OS=Homo sapiens OX=9606 GN=BRD3 PE=1 SV=1	0	FALSE	8.612	4	2	4	1	1	726	79.5	9.36	6.39	2	cell organization and biogenesis;metabolic process;regulation of biological process	nucleus	protein binding	Pf00439	8019	ENSG00000169925.16	BRD3	9			0	1.061	1.159	1.898	1.684	1.522	0.912272	0.934503	0.0104277	0.00563814	0.157879	175.24	59.89	128.91	65.9	3.84	84.4	89.5	97.7	128.4		107.97
FALSE	Low	Master Protein	Q5TGY3	AT-hook DNA-binding motif-containing protein 1 OS=Homo sapiens OX=9606 GN=AHDC1 PE=1 SV=1	0.14	FALSE	1.104	1	1	1	1	1	1603	168.2	9.04	0	1			DNA binding		27245	ENSG00000126705.13	AHDC1	1		Mesodermal Commitment Pathway	0	0.927	0.474	1.074	1.68	0.98	0.982073	0.0117126	0.998862	0.0432785	0.968988	15.76	17.31	35.53	67.87	39.51	117.8	109.2	55.8	117.2	17.36
FALSE	High	Master Protein	Q9NZC9	SWI/SNF-related matrix-associated actin-dependent regulator of chromatin subfamily A-like protein 1 OS=Homo sapiens OX=9606 GN=SMARCAL1 PE=1 SV=1	0.002	FALSE	4.766	2	1	1	1	1	954	105.9	9.06	2.79	1	metabolic process;regulation of biological process;response to stimulus	nucleus	catalytic activity;nucleotide binding;protein binding	Pf00176, Pf00270, Pf00271, Pf07443	50485	ENSG00000138375.12	SMARCAL1	2		Primary Focal Segmental Glomerulosclerosis FSGS	0	1.204	1.363	2.135	1.68	2.494	0.823401	0.821436	0.0768025	0.123457	0.00255991	76.18	53.98	58.97	66.18	47.71	68.9	94	100.9	136.2	58.53	71.48
FALSE	High	Master Protein	Q13470	Non-receptor tyrosine-protein kinase TNK1 OS=Homo sapiens OX=9606 GN=TNK1 PE=1 SV=3	0	FALSE	8.746	6	2	2	2	1	666	72.4	9.48	6.85	2	cell differentiation;cellular component movement;defense response;metabolic process;regulation of biological process;response to stimulus	cytoplasm;cytosol;membrane	catalytic activity;nucleotide binding;protein binding;signal transducer activity	Pf00069, Pf07714	8711	ENSG00000174292.12; ENSG00000283781.1	TNK1	17; CHR_HG2046_PATCH		Focal Adhesion	0	0.558	0.756	2.263	1.67	1.118	0.0827952	0.560617	0.0647094	0.0692316	0.961714	19.52	51.49	56.03	66.62	136.54	209.9	18.7	105	66.4	97.43	118.93
FALSE	High	Master Protein	Q9BVS5	tRNA (adenine(58)-N(1))-methyltransferase, mitochondrial OS=Homo sapiens OX=9606 GN=TRMT61B PE=1 SV=2	0.001	FALSE	7.346	6	2	3	2	1	477	52.9	6.62	0	2	cell organization and biogenesis;metabolic process	mitochondrion;organelle lumen	catalytic activity;protein binding	Pf08704	55006	ENSG00000171103.10	TRMT61B	2			0	0.961	1.026	1.669	1.667	1.263	0.99804	0.998022	0.480817	0.20507	0.887918	95.09	100.39	97.36	104.62	91.86	102.6	69.4	100	128.1	92.31	37.45
FALSE	High	Master Protein	Q969X0	RILP-like protein 2 OS=Homo sapiens OX=9606 GN=RILPL2 PE=1 SV=1	0.002	FALSE	4.371	9	1	2	1	1	211	24	4.98	0	1	cell organization and biogenesis;transport	cytoplasm;cytoskeleton;cytosol;membrane	protein binding	Pf11461	196383	ENSG00000150977.10	RILPL2	12			0	0.721	0.631	1.443	1.649	1.041	0.823447	0.662768	0.868284	0.303956	0.996231	6.87	22.05	31.81	49.33	34.66	117.9	85	74.4	122.7	0.47	12.57
FALSE	High	Master Protein	Q16790	Carbonic anhydrase 9 OS=Homo sapiens OX=9606 GN=CA9 PE=1 SV=2	0	FALSE	10.874	6	1	3	1	1	459	49.7	4.72	11.85	1	metabolic process;regulation of biological process;response to stimulus;transport	membrane;nucleus	catalytic activity;metal ion binding	Pf00194	768	ENSG00000107159.12	CA9	9	Nitrogen metabolism		0	1.757	1.548	1.45	1.645	2.547	0.0860147	0.682857	0.693156	0.153649	0.00376159	97.04	0	97.04	0	0	58.4	102.6	90.4	148.7		77.45
FALSE	High	Master Protein	O95382	Mitogen-activated protein kinase kinase kinase 6 OS=Homo sapiens OX=9606 GN=MAP3K6 PE=1 SV=3	0.001	FALSE	6.419	2	1	1	1	1	1288	142.5	7.11	3.07	1	metabolic process;regulation of biological process;response to stimulus		catalytic activity;metal ion binding;nucleotide binding;protein binding;signal transducer activity	Pf00069, Pf07714, Pf13281	9064	ENSG00000142733.14	MAP3K6	1	MAPK signaling pathway	Insulin Signaling; Angiopoietin Like Protein 8 Regulatory Pathway; MAPK Signaling Pathway	0	0.697	0.771	1.806	1.643	0.952	0.70275	0.867806	0.441901	0.323646	0.986596	8.79	10.76	4.1	2.07	44.43	107.1	74.6	82.6	135.7	22.14	1.93
FALSE	High	None	Q6GMV1	Putative glycosyltransferase ALG1-like OS=Homo sapiens OX=9606 GN=ALG1L PE=2 SV=2	0	FALSE	15.122	9	1	7	1	1	187	21.1	5.08	20.89	1	metabolic process	endoplasmic reticulum	catalytic activity	Pf13692	200810	ENSG00000189366.9	ALG1L	3			0	1.117	0.666	0.977	1.638	1.091	0.811414	0.134602	0.922272	0.000542606	0.966493	22.69	50.24	16.9	75.68	20.35	103.2	115.3	68.8	112.7	21.64	1.66
FALSE	High	Master Protein	Q9HCM4	Band 4.1-like protein 5 OS=Homo sapiens OX=9606 GN=EPB41L5 PE=1 SV=3	0.001	FALSE	5.718	3	2	2	1	1	733	81.8	6.58	4.32	2	cell growth;cell organization and biogenesis;cellular component movement;regulation of biological process;response to stimulus	cytoplasm;cytoskeleton;cytosol;membrane	protein binding;structural molecule activity	Pf00373, Pf08736, Pf09379, Pf09380	57669	ENSG00000115109.13	EPB41L5	2		Endoderm Differentiation; Mesodermal Commitment Pathway	0	0.801	0.992	2.028	1.637	1.625	0.882477	0.995722	0.126036	0.276621	0.403613	0.57	0.87	0	0	0.88	90.5	72.5	89.9	147.1	22.54
FALSE	High	Master Protein	Q8N4L2	Type 2 phosphatidylinositol 4,5-bisphosphate 4-phosphatase OS=Homo sapiens OX=9606 GN=PIP4P2 PE=1 SV=1	0	FALSE	8.791	10	1	2	1	1	257	28.1	8.68	3.04	1	metabolic process	endosome;membrane;vacuole	catalytic activity	Pf09788	55529	ENSG00000155099.7	TMEM55A; PIP4P2	8	Phosphatidylinositol signaling system		0	1.323	0.71	0.821	1.633	1.159	0.649742	0.778984	0.771458	0.306828	0.961714	26.8	20.28	20.72	36.73	27.48	97.6	119.9	69.3	113.1	16.31	24.9
FALSE	High	Master Protein	Q9NXS2	Glutaminyl-peptide cyclotransferase-like protein OS=Homo sapiens OX=9606 GN=QPCTL PE=1 SV=2	0	FALSE	8.722	10	2	2	2	1	382	42.9	9.82	4.62	2	metabolic process	Golgi;membrane	catalytic activity;metal ion binding	Pf04389	54814	ENSG00000011478.11	QPCTL	19			0	1.133	0.614	1.058	1.631	1.138	0.886139	0.536059	0.999979	0.326137	0.968988	99.35	22.81	99.35	63.97	78.36	91.2	150	68.6	90.2	50.22	97.15
FALSE	High	None	Q9Y6R0	Numb-like protein OS=Homo sapiens OX=9606 GN=NUMBL PE=1 SV=1	0	FALSE	7.823	4	2	2	2	1	609	64.9	8.85	5.54	2	cell division;cell organization and biogenesis;cell proliferation;development;metabolic process;regulation of biological process;response to stimulus	cytoplasm	protein binding	Pf00640, Pf06311, Pf08416	9253	ENSG00000105245.9	NUMBL	19	Notch signaling pathway	Notch Signaling Pathway; Notch Signaling Pathway	0	0.815	0.734	0.988	1.628	1.124	0.792425	0.438206	0.966853	0.012402	0.964789	66.37	13.27	96.12	48.73	33.9	95.7	130.5	78.6	95.3	14.79	77.3
FALSE	High	Master Protein	P07919	Cytochrome b-c1 complex subunit 6, mitochondrial OS=Homo sapiens OX=9606 GN=UQCRH PE=1 SV=2	0	FALSE	9.352	20	1	2	1	1	91	10.7	4.44	9.4	1	metabolic process;transport	membrane;mitochondrion	catalytic activity;protein binding;transporter activity	Pf02320	7388	ENSG00000173660.11	UQCRH	1	Huntington's disease; Parkinson's disease; Alzheimer's disease; Oxidative phosphorylation; Non-alcoholic fatty liver disease (NAFLD); Metabolic pathways; Cardiac muscle contraction	Electron Transport Chain	0	0.963	1.156	2.264	1.62	1.872	0.996356	0.939135	0.00209694	0.079221	0.00951306	23.58	34.44	78.94	39.73	39.86	79	81.8	91.3	147.9	11.16	65.2
FALSE	High	Master Protein	P23634	Plasma membrane calcium-transporting ATPase 4 OS=Homo sapiens OX=9606 GN=ATP2B4 PE=1 SV=2	0	FALSE	38.3	5	4	32	1	1	1241	137.8	6.6	94.64	4	cellular component movement;cellular homeostasis;regulation of biological process;response to stimulus;transport	membrane	catalytic activity;enzyme regulator activity;metal ion binding;nucleotide binding;protein binding;transporter activity	Pf00122, Pf00689, Pf00690, Pf00702, Pf08282, Pf12424, Pf12710, Pf13246	493		ATP2B4	1	cGMP-PKG signaling pathway; Adrenergic signaling in cardiomyocytes; Pancreatic secretion; Salivary secretion; cAMP signaling pathway; Calcium signaling pathway		0	1.027	1.044	1.317	1.617	1.352	0.965206	0.989686	0.759787	0.0721269	0.557774	23.63	48.51	15.81	12.82	23.63	94.9	97.5	79.3	128.3	23.32	20.38
FALSE	High	Master Protein	Q6Y288	Beta-1,3-glucosyltransferase OS=Homo sapiens OX=9606 GN=B3GLCT PE=1 SV=2	0	FALSE	13.582	8	2	5	2	1	498	56.5	7.5	14.62	2	metabolic process	endoplasmic reticulum;membrane	catalytic activity	Pf02434	145173	ENSG00000187676.7	B3GALTL; B3GLCT	13	Other types of O-glycan biosynthesis		0	1.12	2.25	2.311	1.617	3.288	0.840569	0.00460858	4.32185e-05	0.000931864	2.39778e-13	82.3	106.5	88.77	45.57	90.42	81.6	83.6	78.9	156	66.51	59.12
FALSE	High	Master Protein	Q96G97	Seipin OS=Homo sapiens OX=9606 GN=BSCL2 PE=1 SV=3	0	FALSE	10.413	6	1	9	1	1	398	44.4	5.17	34.92	1	cell differentiation;cell organization and biogenesis;metabolic process;regulation of biological process;response to stimulus	endoplasmic reticulum;membrane	enzyme regulator activity;protein binding	Pf03344, Pf05395, Pf06775	26580	ENSG00000168000.14	BSCL2	11		Adipogenesis	0	0.407	0.518	2.05	1.614	0.835	0.00373459	0.155014	0.123226	0.288537	0.845344	13.09	21.12	101.98	101.98	42.75	144.9	59	75	121	66.4
FALSE	High	Master Protein	Q9UGM6	Tryptophan--tRNA ligase, mitochondrial OS=Homo sapiens OX=9606 GN=WARS2 PE=1 SV=1	0	FALSE	13.569	12	2	7	2	1	360	40.1	9.28	21.59	2	cell differentiation;metabolic process	cytoplasm;membrane;mitochondrion;organelle lumen	catalytic activity;nucleotide binding	Pf00579	10352	ENSG00000116874.11	WARS2	1	Aminoacyl-tRNA biosynthesis		0	1.016	0.718	1.04	1.611	1.175	0.963122	0.31321	0.998862	0.00314298	0.852097	17.17	36.99	45.75	39.18	38.26	103	114.7	55.3	127	12.29	10.41
TRUE	Medium	Master Protein	Q9NUP7	tRNA:m(4)X modification enzyme TRM13 homolog OS=Homo sapiens OX=9606 GN=TRMT13 PE=1 SV=2	0.028	FALSE	2.336	7	1	2	1	1	481	54.2	8.09	0	1	metabolic process		catalytic activity;metal ion binding	Pf05206, Pf05253, Pf11722	54482	ENSG00000122435.9	TRMT13	1			0	100	100	8.409	1.603	100	4.49643e-16	3.59486e-16	8.61964e-10	0.333214	3.9087e-16			0	75.22			27.3	143.2	229.5
FALSE	High	Master Protein	Q0VDG4	Secernin-3 OS=Homo sapiens OX=9606 GN=SCRN3 PE=1 SV=1	0.001	FALSE	5.433	3	1	2	1	1	424	48.5	5.55	3.87	1	metabolic process;transport		catalytic activity	Pf03577	79634	ENSG00000144306.14	SCRN3	2			0	1.083	0.987	1.253	1.601	1.374	0.935245	0.993914	0.917634	0.201887	0.755056	73.32	52.69	59.81	53.16	74.25	81.4	106.9	80.4	131.4	52.14	52.23
FALSE	High	Master Protein	Q96SZ6	CDK5 regulatory subunit-associated protein 1 OS=Homo sapiens OX=9606 GN=CDK5RAP1 PE=1 SV=2	0	FALSE	11.665	4	2	8	2	1	601	67.6	8.21	21.73	2	cell organization and biogenesis;metabolic process;regulation of biological process	cytoplasm;mitochondrion	catalytic activity;metal ion binding;protein binding	Pf00919, Pf01938, Pf04055	51654	ENSG00000101391.20	CDK5RAP1	20			0	1.24	0.677	0.866	1.6	1.093	0.814901	0.524413	0.8245	0.178932	0.98817	12.66	58.67	12.6	74.28	13.63	89	143.8	71.8	95.4	17.32	24.46
FALSE	High	Master Protein	Q9H497	Torsin-3A OS=Homo sapiens OX=9606 GN=TOR3A PE=1 SV=1	0	FALSE	8.764	4	1	4	1	1	397	46.2	6.01	5.21	1		cytoplasm;endoplasmic reticulum;organelle lumen	catalytic activity;nucleotide binding	Pf06309, Pf13401	64222	ENSG00000186283.13	TOR3A	1			0	0.863	1.003	1.856	1.596	1.601	0.957893	0.991248	0.278206	0.372746	0.491191	0	81.02	0	81.02	0	89.5	77.2	89.8	143.4
FALSE	High	Master Protein	Q12768	WASH complex subunit 5 OS=Homo sapiens OX=9606 GN=WASHC5 PE=1 SV=1	0	FALSE	24.761	8	7	9	7	1	1159	134.2	6.98	20.89	7	cell organization and biogenesis;transport	cytoplasm;cytosol;endoplasmic reticulum;endosome	protein binding	Pf10266	9897	ENSG00000164961.15	KIAA0196; WASHC5	8	Endocytosis		0	1.246	0.889	1.158	1.59	1.254	0.563313	0.931164	0.966662	0.195647	0.889271	45.53	80.63	21.02	60.58	30.02	84.8	154.6	103.2	57.5	59.81	42.99
FALSE	Medium	Master Protein	P05543	Thyroxine-binding globulin OS=Homo sapiens OX=9606 GN=SERPINA7 PE=1 SV=2	0.016	FALSE	2.798	2	1	1	1	1	415	46.3	6.3	1.89	1	regulation of biological process;transport	extracellular	enzyme regulator activity	Pf00079	6906	ENSG00000123561.14	SERPINA7	X	Thyroid hormone synthesis		0		100	100	1.59	100		3.59486e-16	4.24865e-16	0.176841	3.9087e-16				0				154.5	245.5
FALSE	High	Master Protein	Q9NVS2	39S ribosomal protein S18a, mitochondrial OS=Homo sapiens OX=9606 GN=MRPS18A PE=1 SV=1	0	FALSE	10.036	16	2	10	2	1	196	22.2	10.33	32.14	2	cell organization and biogenesis;metabolic process	membrane;mitochondrion;ribosome	structural molecule activity	Pf01084	55168	ENSG00000096080.11	MRPS18A	6	Ribosome		0	0.777	0.678	1.581	1.581	1.054	0.823401	0.437293	0.346461	0.114254	0.992073	76.6	40.35	104.4	86.16	72.9	119.2	64.2	102.8	113.7	67.46	116.65
FALSE	High	Master Protein	P20248	Cyclin-A2 OS=Homo sapiens OX=9606 GN=CCNA2 PE=1 SV=2	0	FALSE	8.675	6	1	8	1	1	432	48.5	6.54	32.28	1	cell division;cell organization and biogenesis;metabolic process;regulation of biological process;response to stimulus	cytoplasm;cytosol;nucleus	catalytic activity;protein binding	Pf00134, Pf02984	890	ENSG00000145386.9	CCNA2	4	Viral carcinogenesis; Hepatitis B; Epstein-Barr virus infection; Progesterone-mediated oocyte maturation; AMPK signaling pathway; Cell cycle	Retinoblastoma (RB) in Cancer; AMP-activated Protein Kinase (AMPK) Signaling; Cell Cycle	0	0.726	0.692	1.099	1.578	0.826	0.34572	0.21659	0.997247	0.0224326	0.571538	28.84	6.7	35.3	35.31	32.65	105.9	105.2	73.3	115.6	40.65	29.61
FALSE	High	Master Protein	A6NJ78	Probable methyltransferase-like protein 15 OS=Homo sapiens OX=9606 GN=METTL15 PE=1 SV=1	0.001	FALSE	6.707	4	1	1	1	1	407	46.1	8.62	3.68	1	metabolic process		catalytic activity;protein binding	Pf01795, Pf13659	196074	ENSG00000169519.20	METTL15	11			0	1.263	0.761	0.946	1.571	1.195	0.467592	0.750253	0.911607	0.122379	0.869139	37.73	21.27	0	3.86	37.73	94.8	119.8	72.1	113.3	34.88
FALSE	High	Master Protein	Q9UGN5	Poly [ADP-ribose] polymerase 2 OS=Homo sapiens OX=9606 GN=PARP2 PE=1 SV=2	0	FALSE	9.643	4	2	2	2	1	583	66.2	8.88	2.98	2	metabolic process;regulation of biological process;response to stimulus	cytoplasm;nucleus	catalytic activity;DNA binding;protein binding	Pf00644, Pf02877, Pf05406	10038	ENSG00000129484.13	PARP2	14	Base excision repair; Apoptosis	NAD+ biosynthetic pathways	0	1.168	0.733	0.822	1.57	0.925	0.851356	0.71876	0.72186	0.163459	0.961714	65.5	35.81	20.16	55.47	42.8	66.3	130.8	91.5	111.5	59.15	35.97
FALSE	High	Master Protein	P15151	Poliovirus receptor OS=Homo sapiens OX=9606 GN=PVR PE=1 SV=2	0.001	FALSE	7.017	4	2	10	2	1	417	45.3	6.52	20.05	2	cell organization and biogenesis;regulation of biological process	cell surface;cytoplasm;extracellular;membrane	protein binding;receptor activity	Pf00047, Pf08205	5817		PVR	19	Cell adhesion molecules (CAMs)		0	1.096	0.288	0.878	1.568	0.906	0.857984	5.09615e-09	0.712988	0.0791649	0.828715	34.01	11.35	43.77	86.88	40.67	122.1	116.5	58	103.4	18.08	88.34
FALSE	High	Master Protein	P56945	Breast cancer anti-estrogen resistance protein 1 OS=Homo sapiens OX=9606 GN=BCAR1 PE=1 SV=2	0.003	FALSE	4.308	2	1	1	1	1	870	93.3	5.67	2.6	1	cell division;cell organization and biogenesis;cell proliferation;cellular component movement;regulation of biological process;response to stimulus	cytoplasm;cytoskeleton;cytosol;membrane	protein binding;signal transducer activity	Pf00018, Pf07653, Pf08824, Pf12026, Pf14604	9564	ENSG00000050820.16	BCAR1	16	Rap1 signaling pathway; Focal adhesion; Regulation of actin cytoskeleton; Leukocyte transendothelial migration; Bacterial invasion of epithelial cells; Chemokine signaling pathway	miR-509-3p alteration of YAP1/ECM axis; VEGFA-VEGFR2 Signaling Pathway; TGF-beta Signaling Pathway; Integrin-mediated Cell Adhesion; Chemokine signaling pathway; EGF/EGFR Signaling Pathway; Focal Adhesion; Regulation of Actin Cytoskeleton	0	0.777	0.668	1.346	1.566	1.046	0.865976	0.672468	0.870302	0.353405	0.999231	30.15	23.09	42.23	43.8	38.71	114.6	89	76.5	119.8	46.65	5.16
FALSE	High	Master Protein	Q9UKD1	Glucocorticoid modulatory element-binding protein 2 OS=Homo sapiens OX=9606 GN=GMEB2 PE=1 SV=1	0	FALSE	14.499	6	2	5	2	1	530	56.4	5.6	16.83	2	metabolic process;regulation of biological process	cytoplasm;cytosol;nucleus	DNA binding;metal ion binding;protein binding	Pf01342	26205	ENSG00000101216.10	GMEB2	20			0	0.45	0.564	1.724	1.555	0.86	0.0163371	0.374445	0.455462	0.368568	0.917083	12.51	14.14	42.14	45.9	28.35	150.3	57.9	92.1	99.7	37.65	68.19
FALSE	High	Master Protein	Q2M389	WASH complex subunit 4 OS=Homo sapiens OX=9606 GN=WASHC4 PE=1 SV=2	0	FALSE	18.572	5	4	6	4	1	1173	136.3	7.44	15.88	4	cell organization and biogenesis;transport	endosome		Pf14744, Pf14745, Pf14746	23325	ENSG00000136051.13	KIAA1033; WASHC4	12	Endocytosis		0	0.791	0.7	1.17	1.555	0.981	0.760707	0.617331	0.947651	0.20507	0.97916	32.65	2.73	33.71	19.21	38.57	135.7	117.7	22.3	124.4	32.04	23.3
FALSE	Medium	Master Protein	Q8IZF6	Adhesion G-protein coupled receptor G4 OS=Homo sapiens OX=9606 GN=ADGRG4 PE=2 SV=2	0.031	FALSE	2.265	0	2	3	2	1	3080	333.2	6.21	3.5	2	regulation of biological process;response to stimulus	membrane	receptor activity;signal transducer activity	Pf00002, Pf00354, Pf01825, Pf05109, Pf14897	139378	ENSG00000156920.10	GPR112; ADGRG4	X			0	0.924	1.33	2.235	1.553	2.066	0.999984	0.899334	0.169296	0.397035	0.132313	12.29	83.25	4.13	89.2	13.98	75.2	69.5	100	155.3	13.65
FALSE	High	Master Protein	Q9C0B0	RING finger protein unkempt homolog OS=Homo sapiens OX=9606 GN=UNK PE=1 SV=2	0	FALSE	8.74	5	3	5	3	1	810	88	6.86	4.56	3	cell organization and biogenesis;cellular component movement;regulation of biological process	cytoplasm	metal ion binding;RNA binding	Pf00642, Pf13920	85451	ENSG00000132478.9	UNK	17			0	0.923	0.938	1.263	1.553	1.063	0.974204	0.945903	0.774025	0.00748945	0.992073	70.88	74.39	47.02	85.17	18.28	113.3	93.4	78.1	115.3	59.97	86.56
FALSE	High	Master Protein	Q96JP5	E3 ubiquitin-protein ligase ZFP91 OS=Homo sapiens OX=9606 GN=ZFP91 PE=1 SV=1	0	FALSE	14.067	7	3	3	3	1	570	63.4	7.36	5.18	3	metabolic process;regulation of biological process	nucleus	catalytic activity;metal ion binding	Pf13465	80829	ENSG00000186660.14	ZFP91	11			0	0.683	0.517	0.972	1.551	0.531	0.620384	0.222146	0.96747	0.400454	0.0931502	61.1	14.85	59.55	8.75	33.11	105.7	137.3	61.2	95.8	78.48	37.64
FALSE	High	Master Protein	Q14135	Transcription cofactor vestigial-like protein 4 OS=Homo sapiens OX=9606 GN=VGLL4 PE=1 SV=4	0	FALSE	13.276	12	2	5	2	1	290	30.9	8.22	13.08	2	metabolic process;regulation of biological process	nucleus	protein binding	Pf15245	9686		VGLL4	3			0	1.917	1.047	1.063	1.547	2.005	0.0389458	0.989678	0.999843	0.400454	0.0497778	60.18	87.84	55.08	110.51	44.69	133.5	101.1	64.6	100.8	87.18	101.36
FALSE	High	Master Protein	P63146	Ubiquitin-conjugating enzyme E2 B OS=Homo sapiens OX=9606 GN=UBE2B PE=1 SV=1	0	FALSE	25.714	45	3	25	2	1	152	17.3	5.01	71.03	3	cell organization and biogenesis;metabolic process;regulation of biological process;response to stimulus	chromosome;cytoplasm;membrane;nucleus	catalytic activity;nucleotide binding;protein binding	Pf00179, Pf14461	7320	ENSG00000119048.7	UBE2B	5	Ubiquitin mediated proteolysis	Proteasome Degradation	0	0.705	0.928	1.749	1.54	1.283	0.197088	0.931164	0.0080619	0.00104436	0.3906	15.61	41.63	58.22	42.89	63.21	87.5	72.1	92.8	147.5	31	36.5
FALSE	High	Master Protein	Q9Y5J7	Mitochondrial import inner membrane translocase subunit Tim9 OS=Homo sapiens OX=9606 GN=TIMM9 PE=1 SV=1	0.002	FALSE	4.953	12	1	2	1	1	89	10.4	7.21	5.48	1	cell organization and biogenesis;transport	membrane;mitochondrion	metal ion binding;protein binding;transporter activity	Pf02953	26520	ENSG00000100575.13	TIMM9	14			0	1.215	0.815	1.395	1.535	1.653	0.662734	0.853224	0.619127	0.0460102	0.0487496	13.99	19.6	32.3	56.63	36.08	88	98.1	68.5	145.4	12.71	14.92
FALSE	High	Master Protein	Q9NWT1	p21-activated protein kinase-interacting protein 1 OS=Homo sapiens OX=9606 GN=PAK1IP1 PE=1 SV=2	0	FALSE	9.685	6	2	3	2	1	392	43.9	8.91	7.79	2	cell proliferation;regulation of biological process	nucleus	protein binding	Pf00400	55003	ENSG00000111845.4	PAK1IP1	6			0	1.446	0.964	0.654	1.533	1.193	0.0704186	0.953754	0.0248779	0.0209377	0.887365	51.55	73.33	21.37	50.76	50.44	93.1	103.3	96.1	107.5	33.22	8.73
FALSE	High	Master Protein	Q1ED39	Lysine-rich nucleolar protein 1 OS=Homo sapiens OX=9606 GN=KNOP1 PE=1 SV=1	0.006	FALSE	3.621	3	1	1	1	1	458	51.6	9.86	2.37	1		nucleus	RNA binding	Pf15477	400506	ENSG00000103550.13	C16orf88; KNOP1	16			0	1.861	2.056	1.535	1.53	3.145	0.050909	0.243435	0.63911	0.366441	0.000179034	80.28	104.04	40.09	0	104.04	48.5	99.4	99.7	152.5	81.24	38.82
FALSE	High	Master Protein	Q9NY64	Solute carrier family 2, facilitated glucose transporter member 8 OS=Homo sapiens OX=9606 GN=SLC2A8 PE=1 SV=3	0.001	FALSE	5.256	3	1	1	1	1	477	50.8	7.61	2.89	1	cell organization and biogenesis;metabolic process;regulation of biological process;response to stimulus;transport	membrane	transporter activity	Pf00083, Pf07690	29988	ENSG00000136856.17	SLC2A8	9		NRF2 pathway	0	0.708	0.657	1.419	1.529	1.005	0.701777	0.654426	0.782014	0.375592	0.992073	33.7	24.51	17.69	22.33	59.61	118.7	84.1	78	119.3	58.35
TRUE	High	Master Protein	Q15653	NF-kappa-B inhibitor beta OS=Homo sapiens OX=9606 GN=NFKBIB PE=1 SV=2	0.007	FALSE	3.459	4	1	2	1	1	356	37.7	4.84	4.2	1	metabolic process;regulation of biological process;response to stimulus	cytoplasm;cytosol;nucleus	protein binding;signal transducer activity	Pf00023, Pf12796, Pf13606, Pf13637, Pf13857	4793	ENSG00000282905.1; ENSG00000104825.16	NFKBIB	19; CHR_HG26_PATCH	Th1 and Th2 cell differentiation; T cell receptor signaling pathway; NOD-like receptor signaling pathway; Epstein-Barr virus infection; Neurotrophin signaling pathway; B cell receptor signaling pathway; Leishmaniasis; Toxoplasmosis; Cytosolic DNA-sensing pathway; Measles; Herpes simplex infection; RIG-I-like receptor signaling pathway; Chemokine signaling pathway; Influenza A; Adipocytokine signa…	RIG-I-like Receptor Signaling; Prolactin Signaling Pathway; Apoptosis; IL-1 signaling pathway; Chemokine signaling pathway; IL17 signaling pathway; TNF related weak inducer of apoptosis (TWEAK) Signaling Pathway; TNF alpha Signaling Pathway	0	2.075	0.873	0.641	1.524	1.331	0.00183108	0.928105	0.114069	0.253858	0.783312	0	0	0	0	0	75.8	157.2	66.2	100.8
FALSE	High	Master Protein	Q8WWB7	Glycosylated lysosomal membrane protein OS=Homo sapiens OX=9606 GN=GLMP PE=1 SV=1	0.001	FALSE	6.965	6	1	1	1	1	406	43.8	6.58	3.03	1	regulation of biological process;response to stimulus	cytosol;membrane;nucleus;vacuole	DNA binding	Pf15065	112770	ENSG00000198715.11	C1orf85; GLMP	1			0	0.823	0.96	1.777	1.523	1.462	0.817472	0.953754	0.0302444	0.0133311	0.164435	34.44	32.72	64.1	34.58	42.39	94.2	77.5	90.4	137.8	41.51	59.55
FALSE	Low	None	P49641	Alpha-mannosidase 2x OS=Homo sapiens OX=9606 GN=MAN2A2 PE=2 SV=3	0.052	FALSE	1.86	1	1	2	1	1	1150	130.5	6.84	0	1	metabolic process	Golgi;membrane	catalytic activity;metal ion binding	Pf01074, Pf07748, Pf09261	4122	ENSG00000196547.14	MAN2A2	15	N-Glycan biosynthesis; Metabolic pathways		0	1.093	0.578	0.923	1.522	1.009	0.874696	0.117227	0.916343	0.179613	0.996231	25.64	15.98	36.46	55.47	35.48	102.5	109.9	74.6	113	32.83	43.77
FALSE	High	None	Q8N7X1	RNA-binding motif protein, X-linked-like-3 OS=Homo sapiens OX=9606 GN=RBMXL3 PE=2 SV=2	0.001	FALSE	5.825	1	1	3	1	1	1067	114.9	9.1	9.97	1			RNA binding	Pf00076, Pf13893, Pf14259	139804	ENSG00000175718.9	RBMXL3	X	Spliceosome		0	1.094	1.53	1.808	1.521	2.946	0.810736	0.0882211	2.98731e-05	6.49797e-05	3.9087e-16	112.79	123.28	44.08	52.41	72.54	53.2	86.8	103.1	156.9	70.33	72.3
FALSE	High	Master Protein	Q13506	NGFI-A-binding protein 1 OS=Homo sapiens OX=9606 GN=NAB1 PE=1 SV=2	0	FALSE	14.701	12	3	5	3	1	487	54.4	6.7	12.4	3	cell differentiation;metabolic process;regulation of biological process	nucleus	protein binding	Pf04902, Pf04904, Pf04905	4664	ENSG00000138386.16	NAB1	2			0	0.738	0.841	1.714	1.52	0.888	0.707349	0.89133	0.140215	0.16998	0.894214	6.39	6.04	54.92	54.15	27.71	113.4	86.9	99.1	100.6	66.87	11.6
TRUE	High	Master Protein	Q9Y6W3	Calpain-7 OS=Homo sapiens OX=9606 GN=CAPN7 PE=1 SV=1	0	FALSE	14.848	7	4	5	4	1	813	92.6	7.65	7.45	4	metabolic process;regulation of biological process	cytoplasm;cytosol;nucleus	catalytic activity;protein binding	Pf00648, Pf01067, Pf04212	23473	ENSG00000131375.9	CAPN7	3		Integrin-mediated Cell Adhesion	0	1.203	0.769	0.414	1.519	0.429	0.606045	0.594768	1.74257e-06	0.179613	4.43071e-06	24.7	31.69	7.25	10.84	1.99	141.6	111.9	87.8	58.7		63.26
FALSE	High	Master Protein	P13051	Uracil-DNA glycosylase OS=Homo sapiens OX=9606 GN=UNG PE=1 SV=2	0.001	FALSE	5.347	8	1	8	1	1	313	34.6	9.32	5.03	1	metabolic process;regulation of biological process;response to stimulus	mitochondrion;nucleus	catalytic activity;DNA binding;protein binding	Pf03167	7374	ENSG00000076248.10	UNG	12	Primary immunodeficiency; Base excision repair		0	0.793	0.818	1.293	1.511	1.132	0.874696	0.912437	0.908499	0.45881	0.968988	36.31	52.84	46.05	77.19	46.54	108.9	86.4	81.5	123.2	49.26	37.44
FALSE	High	Master Protein	Q15388	Mitochondrial import receptor subunit TOM20 homolog OS=Homo sapiens OX=9606 GN=TOMM20 PE=1 SV=1	0	FALSE	13.513	39	2	5	2	1	145	16.3	8.6	20.67	2	cell communication;cell organization and biogenesis;metabolic process;response to stimulus;transport	membrane;mitochondrion	protein binding;transporter activity	Pf02064	9804	ENSG00000173726.10	TOMM20	1			0	1.547	2.332	1.439	1.505	1.855	0.272723	0.085408	0.743957	0.390901	0.218689	76.01	80.75	45.31	94.02	77.2	54.5	99.4	134.1	112	78.04	2.57
FALSE	High	Master Protein	P40199	Carcinoembryonic antigen-related cell adhesion molecule 6 OS=Homo sapiens OX=9606 GN=CEACAM6 PE=1 SV=3	0	FALSE	11.068	6	1	7	1	1	344	37.2	5.82	28.53	1	cell communication;cellular component movement;regulation of biological process;response to stimulus;transport	membrane	protein binding	Pf00047, Pf07679, Pf07686, Pf13895, Pf13927	4680		CEACAM6	19			0	1.374	0.924	0.944	1.505	1.43	0.173403	0.953754	0.897368	0.0736842	0.336165	60.12	58.73	47.93	50.43	68.93	87	119.6	80.4	112.9	62.05	0.77
FALSE	High	Master Protein	P03905	NADH-ubiquinone oxidoreductase chain 4 OS=Homo sapiens OX=9606 GN=MT-ND4 PE=1 SV=1	0	FALSE	18.224	12	3	9	3	1	459	51.5	9.35	20.24	3	cell organization and biogenesis;metabolic process;response to stimulus;transport	membrane;mitochondrion	catalytic activity	Pf00361	4538	ENSG00000198886.2	ND4	MT	Parkinson's disease; Oxidative phosphorylation; Metabolic pathways	Electron Transport Chain; Oxidative phosphorylation	0	0.645	1.028	2.001	1.504	1.193	0.372997	0.998022	0.0213905	0.195647	0.928597	35.31	62.08	92.49	84.46	76.4	74.5	104.1	109.8	111.7	60.52	55.53
FALSE	High	Master Protein	Q4G148	Glucoside xylosyltransferase 1 OS=Homo sapiens OX=9606 GN=GXYLT1 PE=1 SV=2	0.001	FALSE	5.318	5	2	2	2	1	440	50.5	8.65	2.08	2	metabolic process	membrane	catalytic activity	Pf01501	283464	ENSG00000151233.10	GXYLT1	12	Other types of O-glycan biosynthesis		0	0.883	0.995	1.567	1.5	1.233	0.97502	0.998828	0.600375	0.399271	0.922709	36.81	39.83	52.95	19.92	38.37	111.7	56.8	96.1	135.4	86.43	49.42
FALSE	High	Master Protein	P12109	Collagen alpha-1(VI) chain OS=Homo sapiens OX=9606 GN=COL6A1 PE=1 SV=3	0	FALSE	49.594	9	6	29	6	1	1028	108.5	5.43	87.37	6	cell differentiation;cell organization and biogenesis;metabolic process;response to stimulus	extracellular;membrane;organelle lumen	protein binding	Pf00092, Pf01391, Pf13519	1291	ENSG00000142156.14	COL6A1	21	Protein digestion and absorption; Focal adhesion; ECM-receptor interaction; PI3K-Akt signaling pathway	miRNA targets in ECM and membrane receptors	0	1.18	0.974	1.442	1.493	1.553	0.410477	0.959751	0.065302	0.000225962	0.00676269	33.37	48.04	39.97	48.3	30.08	75.2	90.9	97.2	136.7	27.71	25.85
FALSE	High	Master Protein	Q9H4B0	Probable tRNA N6-adenosine threonylcarbamoyltransferase, mitochondrial OS=Homo sapiens OX=9606 GN=OSGEPL1 PE=2 SV=2	0.001	FALSE	7.278	3	1	2	1	1	414	45.1	8.56	5.74	1	metabolic process	mitochondrion	catalytic activity;metal ion binding	Pf00814, Pf01869	64172	ENSG00000128694.11	OSGEPL1	2			0	0.64	0.689	1.616	1.492	0.916	0.449069	0.703196	0.557196	0.499208	0.950085	29.96	39.6	95.29	69.64	40.27	174.4	63.7	52.6	109.4	50.77	92.43
FALSE	Low	Master Protein	Q8NG31	Kinetochore scaffold 1 OS=Homo sapiens OX=9606 GN=KNL1 PE=1 SV=3	0.117	FALSE	1.219	1	1	1	1	1	2342	265.2	5.47	0	1	cell division;cell organization and biogenesis;regulation of biological process	chromosome;cytosol;nucleus	protein binding	Pf13900	57082	ENSG00000137812.19	CASC5; KNL1	15			0	0.01	0.566	100	1.492	0.845	4.49643e-16	0.40947	4.24865e-16	0.507249	0.905623		0		0	0	165.9		94	140.2
FALSE	High	Master Protein	Q12962	Transcription initiation factor TFIID subunit 10 OS=Homo sapiens OX=9606 GN=TAF10 PE=1 SV=1	0.004	FALSE	4.099	6	1	1	1	1	218	21.7	6.57	3.21	1	cell death;cell differentiation;cell organization and biogenesis;metabolic process;regulation of biological process	cytoplasm;nucleus	catalytic activity;DNA binding;protein binding	Pf03540	6881	ENSG00000166337.9	TAF10	11	Basal transcription factors; Herpes simplex infection		0	0.923	0.916	1.432	1.492	1.314	0.986144	0.953754	0.533714	0.215973	0.613859	53.91	37.75	70.82	79.18	62.18	86.3	103.2	64.9	145.7	61.4	53.5
FALSE	High	Master Protein	Q9NRN9	Methyltransferase-like protein 5 OS=Homo sapiens OX=9606 GN=METTL5 PE=1 SV=1	0.007	FALSE	3.443	4	1	1	1	1	209	23.7	6.68	1.65	1	metabolic process		catalytic activity	Pf01170, Pf03602, Pf05175, Pf06325, Pf08241, Pf08242, Pf12847, Pf13649, Pf13659, Pf13847	29081	ENSG00000138382.14	METTL5	2			0	1.016	0.728	1.07	1.491	1.085	0.976252	0.814478	0.999979	0.490068	0.992073	19.92	10.33	21.1	22.45	9.77	105.3	103.8	76.6	114.3	8.27	19.39
FALSE	High	Master Protein	Q9H7B4	Histone-lysine N-methyltransferase SMYD3 OS=Homo sapiens OX=9606 GN=SMYD3 PE=1 SV=4	0.01	FALSE	3.161	3	1	1	1	1	428	49.1	7.25	3.02	1	cell organization and biogenesis;metabolic process;regulation of biological process;response to stimulus	cytoplasm;nucleus	catalytic activity;DNA binding;metal ion binding;protein binding	Pf00856, Pf01753	64754	ENSG00000185420.18	SMYD3	1		Histone Modifications	0	0.834	0.68	1.214	1.49	1.012	0.929766	0.618384	0.948995	0.400454	0.996231	0	0	0	0	0	113.4	94.6	77.1	114.8
FALSE	High	Master Protein	Q4J6C6	Prolyl endopeptidase-like OS=Homo sapiens OX=9606 GN=PREPL PE=1 SV=1	0	FALSE	13.63	6	3	8	3	1	727	83.9	6.38	21.69	3	metabolic process;regulation of biological process	cytoplasm;cytoskeleton;cytosol;Golgi	catalytic activity	Pf00326, Pf02897	9581	ENSG00000138078.15	PREPL	2			0	0.763	0.484	1.059	1.487	0.813	0.235248	5.87877e-05	0.999979	0.0123698	0.326672	54.19	15.74	64.76	69.84	32.09	136.9	125.4	38.5	99.2	15.57	75.11
FALSE	High	Master Protein	Q8WV22	Non-structural maintenance of chromosomes element 1 homolog OS=Homo sapiens OX=9606 GN=NSMCE1 PE=1 SV=5	0.001	FALSE	7.478	8	1	3	1	1	266	30.8	7.47	9.32	1	metabolic process;regulation of biological process;response to stimulus	chromosome;nucleus	catalytic activity;metal ion binding;protein binding	Pf07574, Pf08746	197370	ENSG00000169189.16	NSMCE1	16			0	0.411	0.285	1.553	1.487	0.638	0.000775342	2.99358e-07	0.535751	0.349236	0.0777487	11.75	4.58	19.92	22.61	32.38	161.4	66.3	69.3	103	66.89	18.83
FALSE	High	Master Protein	P05161	Ubiquitin-like protein ISG15 OS=Homo sapiens OX=9606 GN=ISG15 PE=1 SV=5	0	FALSE	15.769	20	2	6	2	1	165	17.9	7.44	24.59	2	defense response;metabolic process;regulation of biological process;response to stimulus	cytoplasm;cytosol;extracellular	protein binding	Pf00240	9636	ENSG00000187608.8	ISG15	1	RIG-I-like receptor signaling pathway	RIG-I-like Receptor Signaling; Type II interferon signaling (IFNG)	0	1.051	0.786	1.111	1.486	1.059	0.929654	0.683276	0.989896	0.0726081	0.99332	31.42	19.41	23.09	18.76	15.34	98.7	99	97	105.3	10.16	36.3
FALSE	High	Master Protein	O95363	Phenylalanine--tRNA ligase, mitochondrial OS=Homo sapiens OX=9606 GN=FARS2 PE=1 SV=1	0	FALSE	17.125	10	3	6	3	1	451	52.3	7.46	10.57	3	metabolic process	cytoplasm;mitochondrion;organelle lumen	catalytic activity;metal ion binding;nucleotide binding;protein binding;RNA binding	Pf01409, Pf03147	10667	ENSG00000145982.11	FARS2	6	Aminoacyl-tRNA biosynthesis		0	0.478	0.698	1.157	1.484	0.554	0.00100101	0.351986	0.966559	0.142573	0.00106842	7.11	35.77	73.72	65.17	19.36	139.3	51.5	94.2	115	52.63	76.09
FALSE	High	Master Protein	P40424	Pre-B-cell leukemia transcription factor 1 OS=Homo sapiens OX=9606 GN=PBX1 PE=1 SV=1	0.001	FALSE	7.25	6	1	3	1	1	430	46.6	7.03	2.98	1	cell differentiation;development;metabolic process;regulation of biological process	cytoplasm;nucleus	DNA binding;protein binding	Pf00046, Pf03792, Pf04091, Pf05920	5087	ENSG00000185630.18	PBX1	1	Transcriptional misregulation in cancer	Preimplantation Embryo; Sudden Infant Death Syndrome (SIDS) Susceptibility Pathways; Mesodermal Commitment Pathway	0	1.429	2.23	2.302	1.476	3.29	0.385948	0.169874	0.0601126	0.490766	0.000910719	49.8	56.26	44.06	42.29	61.28	50.3	71.9	112.2	165.6		45.03
FALSE	High	Master Protein	O14757	Serine/threonine-protein kinase Chk1 OS=Homo sapiens OX=9606 GN=CHEK1 PE=1 SV=2	0.003	FALSE	4.333	2	1	2	1	1	476	54.4	8.25	2.97	1	cell death;cell organization and biogenesis;metabolic process;regulation of biological process;response to stimulus	chromosome;cytoplasm;cytoskeleton;cytosol;nucleus	catalytic activity;nucleotide binding;protein binding	Pf00069, Pf07714, Pf14531	1111	ENSG00000149554.12	CHEK1	11	Viral carcinogenesis; HTLV-I infection; p53 signaling pathway; Cell cycle	Retinoblastoma (RB) in Cancer; ATM Signaling Network in Development and Disease; miRNA Regulation of DNA Damage Response; Cell Cycle; ATR Signaling; DNA Damage Response	0	1.139	0.971	1.219	1.471	1.348	0.880717	0.978964	0.95392	0.502968	0.827611	33.72	8.44	64.54	3.16	33.89	93.4	82.5	90.7	133.5	31.22	39.2
FALSE	High	Master Protein	P42336	Phosphatidylinositol 4,5-bisphosphate 3-kinase catalytic subunit alpha isoform OS=Homo sapiens OX=9606 GN=PIK3CA PE=1 SV=2	0.005	FALSE	3.734	1	1	1	1	1	1068	124.2	7.23	1.97	1	cell death;cellular component movement;cellular homeostasis;defense response;metabolic process;regulation of biological process;response to stimulus;transport	cytoplasm;cytosol;membrane	catalytic activity;enzyme regulator activity;nucleotide binding;protein binding	Pf00454, Pf00613, Pf00792, Pf00794, Pf02192	5290	ENSG00000121879.3	PIK3CA	3	Viral carcinogenesis; Chagas disease (American trypanosomiasis); Longevity regulating pathway - multiple species; Amoebiasis; T cell receptor signaling pathway; TNF signaling pathway; Osteoclast differentiation; Hepatitis B; Insulin signaling pathway; HIF-1 signaling pathway; Central carbon metabolism in cancer; Pancreatic cancer; FoxO signaling pathway; Prolactin signaling pathway; MicroRNAs in …	T-Cell antigen Receptor (TCR) pathway during Staphylococcus aureus infection; Estrogen signaling pathway; Pathways Affected in Adenoid Cystic Carcinoma; G13 Signaling Pathway; Copper homeostasis; IL-4 Signaling Pathway; Regulation of Microtubule Cytoskeleton; Focal Adhesion; AMP-activated Protein Kinase (AMPK) Signaling; Regulation of Actin Cytoskeleton; VEGFA-VEGFR2 Signaling Pathway; Prolactin …	0	0.638	0.832	1.915	1.469	1.222	0.449069	0.891593	0.110146	0.323787	0.908789	0	0	0	0	0	108.3	69.1	90.1	132.4
FALSE	High	Master Protein	Q9P2M7	Cingulin OS=Homo sapiens OX=9606 GN=CGN PE=1 SV=2	0.001	FALSE	6.328	2	2	3	2	1	1197	136.3	5.54	6.17	2	regulation of biological process;response to stimulus	membrane	catalytic activity;motor activity;protein binding	Pf01576, Pf09726	57530		CGN	1	Tight junction		0	1.388	0.933	1.119	1.468	1.513	0.147945	0.962994	0.980776	0.177683	0.185599	70.3	44.27	65.14	58.84	54.57	88.6	160.5	61.5	89.3	47.99	56.1
FALSE	High	Master Protein	Q53HC9	EARP and GARP complex-interacting protein 1 OS=Homo sapiens OX=9606 GN=EIPR1 PE=1 SV=2	0	FALSE	26.027	21	6	14	6	1	387	43.6	5.06	32.59	6			protein binding	Pf00400	7260	ENSG00000032389.12	TSSC1; EIPR1	2			0	0.912	0.705	1.209	1.461	1.099	0.957893	0.263094	0.844497	0.0211931	0.961714	17.54	18.81	32.92	34.05	18.53	116.4	120	47.2	116.3	9.39	34.52
FALSE	High	Master Protein	Q13686	Nucleic acid dioxygenase ALKBH1 OS=Homo sapiens OX=9606 GN=ALKBH1 PE=1 SV=2	0.003	FALSE	4.228	6	1	1	1	1	389	43.8	7.08	3.32	1	cell differentiation;cell organization and biogenesis;cellular component movement;metabolic process;regulation of biological process;response to stimulus	mitochondrion;nucleus	catalytic activity;metal ion binding;RNA binding	Pf13532	8846	ENSG00000100601.9	ALKBH1	14			0	0.632	0.786	1.818	1.461	1.148	0.404408	0.844771	0.302124	0.418925	0.961714	28.3	43.82	192.1	192.1	121.06	112.2	70.9	88.2	128.8	61.02
FALSE	High	Master Protein	Q68CQ7	Glycosyltransferase 8 domain-containing protein 1 OS=Homo sapiens OX=9606 GN=GLT8D1 PE=1 SV=2	0.009	FALSE	3.272	3	1	3	1	1	371	41.9	9.35	6.28	1	metabolic process	Golgi;membrane	catalytic activity	Pf01501	55830	ENSG00000016864.18	GLT8D1	3			0	1.101	0.943	1.244	1.452	1.37	0.892407	0.96416	0.867203	0.27487	0.562362	0	0	0	0	0	90.6	99.8	85.5	124.1
FALSE	High	Master Protein	Q96RD7	Pannexin-1 OS=Homo sapiens OX=9606 GN=PANX1 PE=1 SV=4	0.001	FALSE	6.563	3	1	8	1	1	426	48	6.01	25.16	1	cell communication;cell organization and biogenesis;regulation of biological process;response to stimulus;transport	endoplasmic reticulum;membrane	protein binding;transporter activity		24145	ENSG00000110218.8	PANX1	11	NOD-like receptor signaling pathway		0	1.165	1.028	1.281	1.452	1.492	0.865976	0.997752	0.868711	0.351762	0.535858	8.86	8.81	8.46	8.42	8.6	85.4	99.4	87.8	127.4	8.68	4.08
FALSE	Medium	Master Protein	Q96IR7	4-hydroxyphenylpyruvate dioxygenase-like protein OS=Homo sapiens OX=9606 GN=HPDL PE=1 SV=1	0.034	FALSE	2.207	6	2	2	2	1	371	39.4	7.03	1.71	2	metabolic process		catalytic activity;metal ion binding	Pf12681	84842	ENSG00000186603.5	HPDL	1			0	0.806	1.014	1.55	1.451	1.205	0.837966	0.997752	0.312345	0.0445849	0.874045	12.6	31.39	33.67	36.97	30.01	59.8	60.9	112.2	167.1	20.85	16.19
FALSE	High	Master Protein	Q9H469	F-box/LRR-repeat protein 15 OS=Homo sapiens OX=9606 GN=FBXL15 PE=1 SV=2	0	FALSE	21.894	14	2	3	2	1	300	33	7.44	12.82	2	metabolic process;regulation of biological process	cytoplasm;cytosol	catalytic activity;protein binding		79176	ENSG00000107872.12	FBXL15	10			0	1.311	0.895	0.964	1.449	1.147	0.356858	0.940118	0.931852	0.251628	0.936343	81.21	35.46	58.29	49.67	39.81	74.3	138.8	54.9	132.1	75.47	51.6
FALSE	High	Master Protein	Q5BJH7	Protein YIF1B OS=Homo sapiens OX=9606 GN=YIF1B PE=1 SV=1	0	FALSE	10.226	12	1	4	1	1	314	34.4	9.16	14.48	1	transport	membrane		Pf03878	90522	ENSG00000167645.16	YIF1B	19			0	1.292	0.708	0.921	1.449	1.026	0.71281	0.683276	0.917634	0.496042	0.997565	57.52	35.34	65.39	83.03	65.71	95.5	123.4	67.6	113.6	53.25	6.56
FALSE	High	Master Protein	Q8IZW8	Tensin-4 OS=Homo sapiens OX=9606 GN=TNS4 PE=1 SV=3	0	FALSE	79.789	36	17	55	17	1	715	76.7	7.34	92.49	17	cell death	cytoplasm;cytoskeleton;cytosol	protein binding	Pf00017, Pf08416	84951	ENSG00000131746.12	TNS4	17			0	1.044	0.374	0.615	1.447	0.63	0.823401	3.59486e-16	3.53177e-07	0.0165539	3.80074e-05	32	8.46	22.1	65.92	23.29	160.2	154.3	29.1	56.4	46.55	25.29
FALSE	High	Master Protein	P07942	Laminin subunit beta-1 OS=Homo sapiens OX=9606 GN=LAMB1 PE=1 SV=2	0	FALSE	154.054	19	19	74	19	1	1786	197.9	4.94	228.54	19	cell differentiation;cell organization and biogenesis;cellular component movement;metabolic process;regulation of biological process;response to stimulus;transport	extracellular;membrane;organelle lumen	catalytic activity;motor activity;nucleotide binding;protein binding;signal transducer activity;structural molecule activity	Pf00015, Pf00053, Pf00055, Pf01576, Pf02841, Pf03938, Pf04156, Pf05103, Pf05335, Pf05667, Pf05698, Pf05701, Pf06428, Pf07111, Pf07767, Pf08317, Pf08647, Pf09731, Pf10174, Pf13476, Pf13514, Pf13851, Pf15346, Pf15619	3912	ENSG00000091136.13	LAMB1	7	Amoebiasis; Pathways in cancer; Toxoplasmosis; Focal adhesion; Small cell lung cancer; ECM-receptor interaction; PI3K-Akt signaling pathway	Focal Adhesion; Inflammatory Response Pathway; Alpha 6 Beta 4 signaling pathway; Focal Adhesion-PI3K-Akt-mTOR-signaling pathway	0	1.156	1.06	1.275	1.444	1.574	0.0399806	0.976226	0.190127	3.89604e-07	3.27487e-07	33.16	38.72	33.15	30.86	35.36	82.5	112.8	95.7	109	8.86	14.91
FALSE	Medium	Master Protein	P05177	Cytochrome P450 1A2 OS=Homo sapiens OX=9606 GN=CYP1A2 PE=1 SV=4	0.04	FALSE	2.069	1	1	2	1	1	516	58.4	9.06	0	1											0	0.819	1.071	1.887	1.443	1.546	0.90248	0.976806	0.129323	0.333431	0.445851	0	0	0	0	0	90.2	73.9	96.6	139.4
FALSE	High	Master Protein	P63218	Guanine nucleotide-binding protein G(I)/G(S)/G(O) subunit gamma-5 OS=Homo sapiens OX=9606 GN=GNG5 PE=1 SV=3	0	FALSE	20.612	40	1	17	1	1	68	7.3	9.85	88	1	regulation of biological process;response to stimulus	membrane;mitochondrion	catalytic activity;protein binding;signal transducer activity	Pf00631	2787	ENSG00000174021.10	GNG5	1	Dopaminergic synapse; Serotonergic synapse; Glutamatergic synapse; Circadian entrainment; Morphine addiction; Pathways in cancer; Retrograde endocannabinoid signaling; GABAergic synapse; Alcoholism; Ras signaling pathway; Chemokine signaling pathway; Cholinergic synapse; PI3K-Akt signaling pathway	Focal Adhesion-PI3K-Akt-mTOR-signaling pathway; Calcium Regulation in the Cardiac Cell; G Protein Signaling Pathways; Chemokine signaling pathway; Myometrial Relaxation and Contraction Pathways	0	0.75	0.575	1.033	1.44	0.828	0.0918996	0.000327002	0.986088	0.00132586	0.385119	56.46	37.3	114.8	116.96	80.26	126.8	95.1	73	105.1	72.17	100.16
FALSE	High	Master Protein	Q9UG63	ATP-binding cassette sub-family F member 2 OS=Homo sapiens OX=9606 GN=ABCF2 PE=1 SV=2	0	FALSE	43.324	19	9	23	9	1	623	71.2	7.37	68.97	9	transport	membrane;mitochondrion	catalytic activity;nucleotide binding;transporter activity	Pf00005, Pf12848	10061	ENSG00000033050.7	ABCF2	7			0	0.974	0.728	0.949	1.438	1.037	0.987056	0.0508514	0.743662	0.000141623	0.996415	53.2	35.76	30.1	44.05	41.65	114.9	98	81.1	106	10.36	16.47
FALSE	High	Master Protein	Q9UD71	Protein phosphatase 1 regulatory subunit 1B OS=Homo sapiens OX=9606 GN=PPP1R1B PE=1 SV=2	0	FALSE	56.981	43	5	38	5	1	204	22.9	4.53	142.13	5	cell organization and biogenesis;metabolic process;regulation of biological process;response to stimulus	cytoplasm;cytosol;nucleus	enzyme regulator activity;protein binding	Pf05395	84152	ENSG00000131771.13	PPP1R1B	17	Dopaminergic synapse; Amphetamine addiction; Cocaine addiction; Alcoholism; cAMP signaling pathway	Nicotine Activity on Dopaminergic Neurons	0	1.243	0.99	1.23	1.438	1.611	0.0605297	0.970505	0.641521	0.00104797	0.00354153	50.38	109.56	89.48	101.73	96.69	87.8	136.9	69.2	106.1	69.03	60.99
FALSE	Low	Master Protein	Q6PIF6	Unconventional myosin-VIIb OS=Homo sapiens OX=9606 GN=MYO7B PE=1 SV=2	0.057	FALSE	1.763	1	1	1	1	1	2116	241.4	8.57	2.16	1	cell differentiation	cytoplasm;cytoskeleton	catalytic activity;motor activity;nucleotide binding;protein binding	Pf00018, Pf00063, Pf00373, Pf00612, Pf00784, Pf07653, Pf14604	4648	ENSG00000169994.18	MYO7B	2			0	1.058	0.785	1.222	1.437	1.251	0.931464	0.791803	0.897368	0.302736	0.754516	49.85	35.42	42.99	49.76	43.05	90	95.3	78.9	135.8	43.55	21.15
FALSE	High	Master Protein	Q9NUU6	Inactive ubiquitin thioesterase OTULINL OS=Homo sapiens OX=9606 GN=OTULINL PE=2 SV=1	0	FALSE	18.01	12	3	5	3	1	356	42.2	9.29	12.96	3					54491	ENSG00000145569.5	FAM105A	5			0	1.201	0.549	0.745	1.435	0.881	0.38772	0.00753686	0.133711	0.260597	0.781943	50.45	37.48	59.76	80.1	52.35	133.5	162.4	48.8	55.3	56.32	84.33
TRUE	High	Master Protein	P85298	Rho GTPase-activating protein 8 OS=Homo sapiens OX=9606 GN=ARHGAP8 PE=1 SV=1	0.009	FALSE	3.256	5	1	1	1	1	464	53.5	9.41	0	1	regulation of biological process;response to stimulus	cytoplasm;cytosol	enzyme regulator activity;protein binding	Pf00620, Pf00650, Pf13716	23779	ENSG00000241484.9	ARHGAP8	22			0	2.187	0.806	0.597	1.432	1.637	0.000124662	0.891593	0.0439692	0.444103	0.327979	31.31	13.03	11.22	12.4	50.34	79.3	165.4	63.9	91.5	28.01	16.88
FALSE	High	Master Protein	P0C7P0	CDGSH iron-sulfur domain-containing protein 3, mitochondrial OS=Homo sapiens OX=9606 GN=CISD3 PE=1 SV=1	0.001	FALSE	6.863	10	1	2	1	1	127	14.2	10.55	8.21	1		mitochondrion	metal ion binding	Pf09360	284106	ENSG00000274768.2; ENSG00000277972.1	CISD3	17; CHR_HSCHR17_7_CTG4			0	0.465	0.261	1.358	1.432	0.509	0.0467405	0.00061617	0.917634	0.593664	0.124286	27.57	1.62	115.29	91.79	14.7	178.9	83.2	46.8	91.1		93.6
FALSE	High	Master Protein	Q9BUE0	Mediator of RNA polymerase II transcription subunit 18 OS=Homo sapiens OX=9606 GN=MED18 PE=1 SV=1	0	FALSE	18.173	22	3	4	3	1	208	23.6	6.54	9.94	3	metabolic process;regulation of biological process	nucleus	catalytic activity;protein binding	Pf09637	54797	ENSG00000130772.13	MED18	1			0	1.026	0.712	1.147	1.431	1.264	0.97502	0.78001	0.980391	0.581814	0.887001	32.71	8.95	27.76	23.84	24.68	81.1	179.2	64	75.6	64.54	71.07
FALSE	Medium	Master Protein	Q86UX6	Serine/threonine-protein kinase 32C OS=Homo sapiens OX=9606 GN=STK32C PE=1 SV=1	0.028	FALSE	2.354	2	1	1	1	1	486	55	6.61	1.76	1	metabolic process;regulation of biological process;response to stimulus		catalytic activity;metal ion binding;nucleotide binding	Pf00069, Pf07714, Pf14531	282974	ENSG00000165752.16	STK32C	10			0	0.715	0.553	1.105	1.43	0.79	0.771542	0.40947	0.999979	0.573295	0.855248	0	27.02	0	88.44	0	130.8	93.6	72.3	103.4
FALSE	High	Master Protein	P49768	Presenilin-1 OS=Homo sapiens OX=9606 GN=PSEN1 PE=1 SV=1	0	FALSE	15.529	4	1	10	1	1	467	52.6	5.31	34.07	1	cell death;cell differentiation;cell organization and biogenesis;cell proliferation;cellular component movement;cellular homeostasis;metabolic process;regulation of biological process;response to stimulus;transport	cell surface;chromosome;cytoplasm;endoplasmic reticulum;Golgi;membrane;mitochondrion;nucleus	catalytic activity;protein binding;transporter activity	Pf01080	5663	ENSG00000080815.18	PSEN1	14	Neurotrophin signaling pathway; Wnt signaling pathway; Alzheimer's disease; Notch signaling pathway	Alzheimers Disease; Notch Signaling Pathway; Canonical and Non-canonical Notch signaling; Notch Signaling Pathway	0	0.766	0.777	1.444	1.424	1.367	0.537572	0.577417	0.321551	0.0393636	0.288006	41.02	36.05	97.86	103.34	58.2	106.3	58.4	68.8	166.5	33.89	67.15
FALSE	High	Master Protein	Q8NAX2	Keratinocyte differentiation factor 1 OS=Homo sapiens OX=9606 GN=KDF1 PE=1 SV=2	0	FALSE	9.846	6	1	2	1	1	398	43.6	6.54	9.42	1	cell differentiation;development;regulation of biological process	cytoplasm		Pf15551	126695	ENSG00000175707.8	C1orf172; KDF1	1			0	1.052	0.736	0.893	1.423	1.047	0.933093	0.493675	0.795648	0.137117	0.999858	34.57	10.83	41.37	49.97	44.28	104.7	108.7	77	109.6	19.19	38.88
FALSE	High	Master Protein Candidate	Q6A1A2	Putative 3-phosphoinositide-dependent protein kinase 2 OS=Homo sapiens OX=9606 GN=PDPK2P PE=5 SV=1	0	FALSE	10.442	9	2	4	2	1	396	44.7	8.37	11.38	2	cell organization and biogenesis;cellular component movement;metabolic process;regulation of biological process;response to stimulus	cytoplasm;cytosol;membrane	catalytic activity;enzyme regulator activity;nucleotide binding;protein binding	Pf00069, Pf07714, Pf14531	5170		PDPK1	16		MicroRNAs in cardiomyocyte hypertrophy; EGF/EGFR Signaling Pathway; Integrin-mediated Cell Adhesion; B Cell Receptor Signaling Pathway; VEGFA-VEGFR2 Signaling Pathway; Brain-Derived Neurotrophic Factor (BDNF) signaling pathway; Human Thyroid Stimulating Hormone (TSH) signaling pathway; Insulin Signaling; Focal Adhesion; T-Cell antigen Receptor (TCR) Signaling Pathway; Angiopoietin Like Protein 8 …	0	1.024	0.746	0.993	1.423	1.061	0.97245	0.694113	0.972282	0.387016	0.99332	29.78	16.78	24.86	11.89	44.53	104.4	106.9	77.9	110.8	45.41	11.56
FALSE	High	Master Protein	O15530	3-phosphoinositide-dependent protein kinase 1 OS=Homo sapiens OX=9606 GN=PDPK1 PE=1 SV=1	0	FALSE	10.442	6	2	4	2	1	556	63.1	7.36	11.38	2	cell organization and biogenesis;cellular component movement;metabolic process;regulation of biological process;response to stimulus	cytoplasm;cytosol;membrane;nucleus	catalytic activity;enzyme regulator activity;nucleotide binding;protein binding	Pf00069, Pf07714, Pf14531, Pf14593	5170	ENSG00000140992.18	PDPK1	16	T cell receptor signaling pathway; Insulin signaling pathway; FoxO signaling pathway; PPAR signaling pathway; Neurotrophin signaling pathway; Non-small cell lung cancer; Endometrial cancer; Prostate cancer; Thyroid hormone signaling pathway; Toxoplasmosis; Apoptosis; Focal adhesion; Proteoglycans in cancer; Choline metabolism in cancer; AMPK signaling pathway; mTOR signaling pathway; Aldosterone-…	Brain-Derived Neurotrophic Factor (BDNF) signaling pathway; Human Thyroid Stimulating Hormone (TSH) signaling pathway; Insulin Signaling; Focal Adhesion; T-Cell antigen Receptor (TCR) Signaling Pathway; PPAR signaling pathway; Focal Adhesion-PI3K-Akt-mTOR-signaling pathway; Angiopoietin Like Protein 8 Regulatory Pathway; Cardiac Hypertrophic Response; Interleukin-11 Signaling Pathway; MicroRNAs i…	0	1.024	0.746	0.993	1.423	1.061	0.97245	0.694113	0.972282	0.387016	0.99332	29.78	16.78	24.86	11.89	44.53	104.4	106.9	77.9	110.8	45.41	11.56
FALSE	Medium	None	Q6P582	Mitotic-spindle organizing protein 2A OS=Homo sapiens OX=9606 GN=MZT2A PE=1 SV=2	0.014	FALSE	2.879	4	1	6	1	1	158	16.2	9.64	10.54	1		cytoplasm;cytoskeleton;cytosol		Pf12926	653784	ENSG00000173272.15	MZT2A	2			0	1.025	0.832	1.14	1.419	1.124	0.97502	0.889339	0.980391	0.465121	0.971674	15.96	7.86	21.78	12.31	28.56	98.8	102.3	82.2	116.7	12.51	9.8
FALSE	High	Master Protein	O00443	Phosphatidylinositol 4-phosphate 3-kinase C2 domain-containing subunit alpha OS=Homo sapiens OX=9606 GN=PIK3C2A PE=1 SV=2	0	FALSE	35.628	6	7	16	7	1	1686	190.6	8.02	42.95	7	cell organization and biogenesis;cellular component movement;metabolic process;regulation of biological process;response to stimulus;transport	cytoplasm;cytosol;Golgi;membrane;nucleus	catalytic activity;nucleotide binding;protein binding	Pf00168, Pf00454, Pf00613, Pf00787, Pf00792, Pf00794	5286	ENSG00000011405.13	PIK3C2A	11	Phosphatidylinositol signaling system; Inositol phosphate metabolism; Metabolic pathways	Signaling Pathways in Glioblastoma; DNA Damage Response (only ATM dependent); Regulation of Actin Cytoskeleton; Focal Adhesion-PI3K-Akt-mTOR-signaling pathway; Angiopoietin Like Protein 8 Regulatory Pathway; Insulin Signaling; Microglia Pathogen Phagocytosis Pathway	0	0.826	0.788	1.279	1.417	1.037	0.744919	0.456899	0.703334	0.0275139	0.999534	32.85	45.56	42.99	56.15	40.9	96.5	111.6	104.7	87.2	86.96	63.67
FALSE	High	Master Protein	Q9BRQ6	MICOS complex subunit MIC25 OS=Homo sapiens OX=9606 GN=CHCHD6 PE=1 SV=1	0	FALSE	9.429	16	2	5	2	1	235	26.4	8.85	8.86	2	cell organization and biogenesis;response to stimulus	cytosol;membrane;mitochondrion	protein binding	Pf05300	84303	ENSG00000159685.10	CHCHD6	3			0	1.624	1.175	1.025	1.417	1.665	0.0134553	0.928105	0.992758	0.146954	0.0520094	29.99	36.69	27.78	11.91	33.86	73.2	118.9	86	121.9	33.97	28.13
FALSE	High	Master Protein	Q6PJI9	GATOR complex protein WDR59 OS=Homo sapiens OX=9606 GN=WDR59 PE=1 SV=2	0.001	FALSE	5.392	4	2	6	2	1	974	109.7	7.91	0	2	cell communication;regulation of biological process;response to stimulus	membrane;vacuole	metal ion binding;protein binding	Pf00400, Pf05773, Pf08662, Pf12678, Pf13639	79726	ENSG00000103091.14	WDR59	16	mTOR signaling pathway		0	0.608	0.929	2.162	1.416	1.315	0.404408	0.967989	0.220094	0.593664	0.863433	0	0	86.16	86.16	86.16	103.8	63.2	96.4	136.6
FALSE	High	Master Protein	P62306	Small nuclear ribonucleoprotein F OS=Homo sapiens OX=9606 GN=SNRPF PE=1 SV=1	0	FALSE	12.029	24	2	14	2	1	86	9.7	4.67	32.11	2	cell organization and biogenesis;metabolic process;transport	cytoplasm;cytosol;nucleus;spliceosomal complex	protein binding;RNA binding	Pf01423	6636	ENSG00000139343.10	SNRPF	12	Spliceosome	mRNA Processing	0	0.879	0.744	1.073	1.414	1.087	0.904007	0.577139	0.999979	0.0473128	0.987243	39.16	35.39	34.23	74.01	58.94	70.2	142.1	48.6	139.1	53.43	15.76
FALSE	High	Master Protein	Q9Y6K9	NF-kappa-B essential modulator OS=Homo sapiens OX=9606 GN=IKBKG PE=1 SV=2	0	FALSE	7.805	9	3	3	3	1	419	48.2	5.71	6.15	3	cell death;cellular component movement;defense response;metabolic process;regulation of biological process;response to stimulus	cytoplasm;cytosol;nucleus	metal ion binding;protein binding;signal transducer activity	Pf04111, Pf11577, Pf12128, Pf13851, Pf14362	8517	ENSG00000269335.5	IKBKG	X	Viral carcinogenesis; Chagas disease (American trypanosomiasis); Th1 and Th2 cell differentiation; Primary immunodeficiency; T cell receptor signaling pathway; TNF signaling pathway; NOD-like receptor signaling pathway; Osteoclast differentiation; Hepatitis B; Pancreatic cancer; Chronic myeloid leukemia; Antifolate resistance; Epstein-Barr virus infection; B cell receptor signaling pathway; Acute…	Toll-like Receptor Signaling; IL-1 signaling pathway; Rac1/Pak1/p38/MMP-2 pathway; T-Cell antigen Receptor (TCR) Signaling Pathway; EBV LMP1 signaling; Brain-Derived Neurotrophic Factor (BDNF) signaling pathway; Leptin signaling pathway; MicroRNAs in cardiomyocyte hypertrophy; Focal Adhesion-PI3K-Akt-mTOR-signaling pathway; Estrogen signaling pathway; ATM Signaling Network in Development and Dise…	0	0.786	0.852	1.027	1.408	1.127	0.701361	0.896823	0.995898	0.362481	0.961714	39.14	48.53	78.89	108.03	85.76	94.8	120.4	62.7	122	66.77	2.6
FALSE	High	Master Protein	P15529	Membrane cofactor protein OS=Homo sapiens OX=9606 GN=CD46 PE=1 SV=3	0	FALSE	17.457	6	2	22	2	1	392	43.7	6.74	26.01	2	defense response;metabolic process;regulation of biological process;response to stimulus	cell surface;cytoplasm;Golgi;membrane	catalytic activity;enzyme regulator activity;protein binding;receptor activity	Pf00084	4179	ENSG00000117335.19	CD46	1	Complement and coagulation cascades; Measles	Complement and Coagulation Cascades	0	0.846	0.691	1.029	1.407	1.022	0.831339	0.214361	0.995898	0.0772305	0.99332	52.21	43.47	40.42	70.46	69.75	125.2	78.5	90.5	105.8	75.71	91.43
FALSE	High	Master Protein Candidate	P05937	Calbindin OS=Homo sapiens OX=9606 GN=CALB1 PE=1 SV=2	0.006	FALSE	3.592	4	1	1	1	1	261	30	4.83	1.91	1	cellular homeostasis;metabolic process;regulation of biological process;response to stimulus	cytoplasm;cytosol;nucleus	metal ion binding;protein binding	Pf00036, Pf13405, Pf13499	793	ENSG00000104327.7	CALB1	8	Endocrine and other factor-regulated calcium reabsorption		0	0.828	0.349	0.593	1.407	0.492	0.823401	3.79489e-05	0.0461457	0.462717	0.000233452	0	0	0	0	0	149.8	124.1	52.4	73.7
FALSE	High	Master Protein	P22676	Calretinin OS=Homo sapiens OX=9606 GN=CALB2 PE=2 SV=2	0.006	FALSE	3.592	4	1	1	1	1	271	31.5	5.15	1.91	1	cellular homeostasis	cytoplasm;cytosol;nucleus	metal ion binding	Pf00036, Pf13405, Pf13499	794	ENSG00000282830.1; ENSG00000172137.18	CALB2	16; CHR_HSCHR16_4_CTG3_1			0	0.828	0.349	0.593	1.407	0.492	0.823401	3.79489e-05	0.0461457	0.462717	0.000233452	0	0	0	0	0	149.8	124.1	52.4	73.7
FALSE	High	Master Protein	Q8TBZ6	tRNA methyltransferase 10 homolog A OS=Homo sapiens OX=9606 GN=TRMT10A PE=1 SV=1	0	FALSE	29.087	18	4	15	4	1	339	39.7	7.65	51.33	4	metabolic process	cytoskeleton;cytosol;nucleus	catalytic activity;RNA binding	Pf01746	93587	ENSG00000145331.13	TRMT10A	4			0	0.938	0.649	0.781	1.406	0.762	0.982528	0.00857832	0.179347	0.0393636	0.128185	59.89	41.97	43.55	93.14	53.31	127.9	115.2	65.1	91.8	14.06	6.56
FALSE	High	Master Protein	P35908	Keratin, type II cytoskeletal 2 epidermal OS=Homo sapiens OX=9606 GN=KRT2 PE=1 SV=2	0	TRUE	40.431	18	8	36	5	1	639	65.4	8	82.98	8	cell death;cell organization and biogenesis;cell proliferation;cellular component movement;metabolic process	cytoskeleton;cytosol;membrane;nucleus	protein binding;structural molecule activity	Pf00038, Pf08614, Pf12128, Pf13166	3849	ENSG00000172867.3	KRT2	12			0	0.632	1.747	4.809	1.404	2.009	0.0337302	0.0020264	4.24865e-16	0.00292072	1.05191e-06	23.69	87.72	88.8	87.23	107.22	69.8	49	172.2	109	73.09	48.75
TRUE	Medium	Master Protein	Q5XUX1	F-box/WD repeat-containing protein 9 OS=Homo sapiens OX=9606 GN=FBXW9 PE=1 SV=2	0.02	FALSE	2.624	2	1	1	1	1	488	54.1	6.48	1.69	1	metabolic process	cytosol	catalytic activity;protein binding	Pf00400, Pf12937	84261		FBXW9	19			0	100	100	1.317	1.403	100	4.49643e-16	3.59486e-16	0.817295	0.421992	3.9087e-16			85.45	87.05			127.1	105.4	167.5		33.25
FALSE	Low	Master Protein Candidate	Q9BZA8	Protocadherin-11 Y-linked OS=Homo sapiens OX=9606 GN=PCDH11Y PE=1 SV=1	0.161	FALSE	1	1	1	1	1	1	1340	146.7	5.21	0	1		membrane	metal ion binding	Pf00028, Pf08266, Pf08374, Pf14642	83259	ENSG00000099715.14	PCDH11Y	Y			0	1.299	1	1.084	1.402	1.37	0.671316	0.997752	0.999979	0.462387	0.745713	37.72	25.66	48.62	38.63	22.81	100.4	99.9	83.1	116.6	27.72	44.55
FALSE	Low	Master Protein	Q9BZA7	Protocadherin-11 X-linked OS=Homo sapiens OX=9606 GN=PCDH11X PE=2 SV=1	0.161	FALSE	1	1	1	1	1	1	1347	147.5	5.21	0	1	regulation of biological process	membrane	metal ion binding	Pf00028, Pf08266, Pf08374, Pf14642	27328	ENSG00000102290.22	PCDH11X	X			0	1.299	1	1.084	1.402	1.37	0.671316	0.997752	0.999979	0.462387	0.745713	37.72	25.66	48.62	38.63	22.81	100.4	99.9	83.1	116.6	27.72	44.55
FALSE	Low	Master Protein	Q8IXJ9	Putative Polycomb group protein ASXL1 OS=Homo sapiens OX=9606 GN=ASXL1 PE=1 SV=4	0.161	FALSE	1.001	1	1	1	1	1	1541	165.3	6.21	0	1	cell organization and biogenesis;metabolic process;regulation of biological process;response to stimulus		DNA binding;metal ion binding;protein binding	Pf05066, Pf13919, Pf13922	171023	ENSG00000171456.16	ASXL1	20			0	0.289	0.667	2.114	1.401	0.934	1.0402e-05	0.684898	0.178718	0.593582	0.968988	8.7	36.94	28.9	0	72.5	131.4	58.1	87.7	122.8	69.11	70.1
FALSE	High	Master Protein	Q9Y2H9	Microtubule-associated serine/threonine-protein kinase 1 OS=Homo sapiens OX=9606 GN=MAST1 PE=1 SV=2	0.002	FALSE	4.759	2	2	5	1	1	1570	170.6	8.44	4.26	2	cell organization and biogenesis;metabolic process;regulation of biological process;response to stimulus	cytoplasm;cytoskeleton;membrane	catalytic activity;metal ion binding;nucleotide binding;protein binding	Pf00069, Pf00595, Pf07714, Pf08926, Pf13180, Pf14531	22983	ENSG00000105613.9	MAST1	19			0	0.01	1.392	100	1.401	1.949	4.49643e-16	0.85145	4.24865e-16	0.577363	0.104031		0		70.72	70.72	92.1		128.2	179.6
FALSE	High	Master Protein	Q9BUT9	MAPK regulated corepressor interacting protein 2 OS=Homo sapiens OX=9606 GN=MCRIP2 PE=1 SV=2	0	FALSE	50.878	48	3	26	3	1	160	17.8	9.41	75.11	3		cytoplasm;nucleus	protein binding	Pf14799	84331	ENSG00000172366.19	FAM195A; MCRIP2	16			0	0.935	0.709	1.042	1.398	1.165	0.980843	0.0997086	0.998862	0.0261262	0.793241	41.66	17.97	63.03	67.94	60.6	105.9	94.5	72.7	126.9	30.87	43.02
FALSE	High	Master Protein	Q9HBI6	Phylloquinone omega-hydroxylase CYP4F11 OS=Homo sapiens OX=9606 GN=CYP4F11 PE=1 SV=3	0.001	FALSE	5.256	3	1	1	1	1	524	60.1	6.73	2.62	1	coagulation;defense response;metabolic process;response to stimulus	endoplasmic reticulum;membrane	catalytic activity;metal ion binding	Pf00067	57834	ENSG00000171903.16	CYP4F11	19		Metapathway biotransformation; Oxidation by Cytochrome P450	0	0.721	0.749	1.392	1.392	1.043	0.748018	0.811279	0.808655	0.565702	0.999858	23.66	16.91	44.63	10.66	31.09	113	84.6	84.6	117.8	30.29	46.05
FALSE	High	Master Protein	Q5SYE7	NHS-like protein 1 OS=Homo sapiens OX=9606 GN=NHSL1 PE=1 SV=2	0.004	FALSE	4.014	1	1	1	1	1	1610	170.6	6.96	2.29	1	cellular component movement	membrane		Pf15273	57224	ENSG00000135540.11	NHSL1	6			0	0.819	0.654	1.197	1.391	0.958	0.852816	0.384173	0.928088	0.413393	0.968988	15.58	15.55	9.03	29.39	21.33	116.5	91.8	80.2	111.6	22.71	8.79
FALSE	High	Master Protein	Q13488	V-type proton ATPase 116 kDa subunit a isoform 3 OS=Homo sapiens OX=9606 GN=TCIRG1 PE=1 SV=3	0	FALSE	17.183	5	3	9	3	1	830	92.9	7.12	19.74	3	cell communication;cell organization and biogenesis;cellular homeostasis;defense response;metabolic process;regulation of biological process;response to stimulus;transport	membrane;mitochondrion	catalytic activity;protein binding;transporter activity	Pf01496	10312	ENSG00000110719.9	TCIRG1	11	Lysosome; Tuberculosis; Phagosome; Oxidative phosphorylation; Vibrio cholerae infection; Metabolic pathways; Epithelial cell signaling in Helicobacter pylori infection; Collecting duct acid secretion; Synaptic vesicle cycle; Rheumatoid arthritis	TYROBP Causal Network	0	1.092	0.743	1.145	1.391	1.123	0.874212	0.454161	0.969119	0.102268	0.961714	61.87	44.82	53.21	64.99	48.15	87.4	71.1	102.3	139.2	62.38	89.27
FALSE	Medium	Master Protein	Q86X83	COMM domain-containing protein 2 OS=Homo sapiens OX=9606 GN=COMMD2 PE=1 SV=2	0.028	FALSE	2.337	4	1	5	1	1	199	22.7	6.73	10.95	1	metabolic process;regulation of biological process	cytoplasm	protein binding	Pf07258	51122	ENSG00000114744.8	COMMD2	3			0	1.127	0.741	0.999	1.388	1.031	0.823401	0.655715	0.971644	0.380962	0.997101	28.97	10.81	20.43	10.39	20.27	109.3	106.3	78.1	106.2	20.3	19.12
FALSE	Medium	Master Protein	Q9H000	Probable E3 ubiquitin-protein ligase makorin-2 OS=Homo sapiens OX=9606 GN=MKRN2 PE=1 SV=2	0.014	FALSE	2.869	2	1	1	1	1	416	46.9	7.61	1.88	1	metabolic process		catalytic activity;metal ion binding;protein binding;RNA binding	Pf00097, Pf00642, Pf13639	23609	ENSG00000075975.15	MKRN2	3			0	1.002	0.81	1.348	1.387	1.363	0.987056	0.87405	0.741917	0.438299	0.635673	12.38	78.5	27.4	60.51	23.88	95.8	96	77.6	130.6		11.77
FALSE	High	Master Protein	Q99720	Sigma non-opioid intracellular receptor 1 OS=Homo sapiens OX=9606 GN=SIGMAR1 PE=1 SV=1	0	FALSE	29.585	29	3	13	3	1	223	25.1	5.96	57.05	3	cell organization and biogenesis;regulation of biological process;response to stimulus;transport	endoplasmic reticulum;membrane;nucleus	protein binding;receptor activity;signal transducer activity	Pf04622	10280	ENSG00000147955.16	SIGMAR1	9			0	0.508	0.694	1.444	1.387	0.905	8.47453e-05	0.0938051	0.445425	0.0623143	0.817771	26.29	29.04	72.38	55.55	43.23	127.5	37.3	130.3	104.9	66.51	122.18
FALSE	High	Master Protein	P07902	Galactose-1-phosphate uridylyltransferase OS=Homo sapiens OX=9606 GN=GALT PE=1 SV=3	0.001	FALSE	6.84	4	1	4	1	1	379	43.3	6.99	13.35	1	metabolic process	cytosol;Golgi	catalytic activity;metal ion binding;protein binding	Pf01087, Pf02744	2592	ENSG00000213930.11	GALT	9	Prolactin signaling pathway; Galactose metabolism; Amino sugar and nucleotide sugar metabolism; Metabolic pathways		0	0.645	0.972	2.087	1.385	1.346	0.197479	0.96416	0.00185409	0.182522	0.553407	21.51	37.62	32.12	23.85	51.72	101	65.1	98.1	135.9	42.94	36.74
FALSE	High	Master Protein	Q9P107	GEM-interacting protein OS=Homo sapiens OX=9606 GN=GMIP PE=1 SV=2	0.001	FALSE	7.57	2	1	3	1	1	970	106.6	5.72	7.38	1	regulation of biological process;response to stimulus	cytosol;membrane	enzyme regulator activity;metal ion binding;protein binding	Pf00130, Pf00620	51291	ENSG00000089639.10	GMIP	19			0	1.423	1.037	1.026	1.384	1.46	0.486167	0.993519	0.995898	0.50477	0.597913	10.37	13.03	0	0.31	10.37	81	115.3	85.4	118.3	23.13
FALSE	High	Master Protein	P82932	28S ribosomal protein S6, mitochondrial OS=Homo sapiens OX=9606 GN=MRPS6 PE=1 SV=3	0	FALSE	32.249	49	5	20	5	1	125	14.2	9.26	69.79	5	cell organization and biogenesis;metabolic process	membrane;mitochondrion;ribosome	protein binding;RNA binding;structural molecule activity	Pf01250	64968	ENSG00000243927.5	MRPS6	21	Ribosome		0	0.81	0.983	1.296	1.382	1.202	0.740083	0.976226	0.636727	0.0770839	0.786817	40.68	57.89	45.82	28.91	50.86	69	116	96.8	118.2	99.23	57.55
FALSE	High	Master Protein	Q9BUB7	Transmembrane protein 70, mitochondrial OS=Homo sapiens OX=9606 GN=TMEM70 PE=1 SV=2	0.001	FALSE	5.46	3	1	3	1	1	260	29	8.91	8.01	1	cell organization and biogenesis	membrane;mitochondrion		Pf06979	54968	ENSG00000175606.10	TMEM70	8			0	1.216	1.255	1.028	1.382	1.734	0.539656	0.801835	0.986418	0.102084	0.0182437	43.57	84.24	54.74	65.37	76.2	93.4	109.8	83.9	112.9	61.93	27.79
FALSE	High	Master Protein	Q96CS2	HAUS augmin-like complex subunit 1 OS=Homo sapiens OX=9606 GN=HAUS1 PE=1 SV=1	0.001	FALSE	5.48	7	1	1	1	1	278	31.8	5.53	2.34	1	cell division;cell organization and biogenesis;regulation of biological process	cytoplasm;cytoskeleton;cytosol	protein binding		115106	ENSG00000152240.12	HAUS1	18			0	1.217	1.501	1.7	1.378	2.069	0.812719	0.829197	0.636635	0.622052	0.172798	0	0	0	0	0	69.1	84.1	103.8	143
FALSE	Medium	Master Protein	Q38SD2	Leucine-rich repeat serine/threonine-protein kinase 1 OS=Homo sapiens OX=9606 GN=LRRK1 PE=1 SV=3	0.014	FALSE	2.893	1	1	2	1	1	2015	225.2	6.68	0	1	metabolic process;regulation of biological process;response to stimulus	cytoplasm;cytosol;mitochondrion	catalytic activity;metal ion binding;nucleotide binding;protein binding;signal transducer activity	Pf00025, Pf00069, Pf07714, Pf08477, Pf12796, Pf12799, Pf13637, Pf13855	79705	ENSG00000154237.12	LRRK1	15			0	0.83	0.726	1.203	1.376	0.999	0.823401	0.459612	0.91175	0.207777	0.984979	0	0	0	0	0	112.5	93.4	81.7	112.4
FALSE	High	Master Protein Candidate	Q7Z5Q1	Cytoplasmic polyadenylation element-binding protein 2 OS=Homo sapiens OX=9606 GN=CPEB2 PE=2 SV=3	0.002	FALSE	4.476	2	1	1	1	1	589	64.9	7.21	1.95	1	metabolic process;regulation of biological process;response to stimulus	cytoplasm;nucleus	enzyme regulator activity;RNA binding;translation regulator activity	Pf00076, Pf14259	132864	ENSG00000283087.1; ENSG00000137449.15	CPEB2	4; CHR_HSCHR4_2_CTG4	Dorso-ventral axis formation; Progesterone-mediated oocyte maturation; Oocyte meiosis		0	100	100	1.161	1.372	100	4.49643e-16	3.59486e-16	0.980391	0.593664	3.9087e-16			20.75	22.89			133	112.5	154.4		16.76
FALSE	High	Master Protein Candidate	Q8NE35	Cytoplasmic polyadenylation element-binding protein 3 OS=Homo sapiens OX=9606 GN=CPEB3 PE=1 SV=2	0.002	FALSE	4.476	2	1	1	1	1	698	76	7.03	1.95	1	metabolic process;regulation of biological process;response to stimulus	cytoplasm;membrane;nucleus	protein binding;RNA binding;translation regulator activity	Pf00076, Pf14259	22849	ENSG00000107864.14	CPEB3	10	Dorso-ventral axis formation; Progesterone-mediated oocyte maturation; Oocyte meiosis		0	100	100	1.161	1.372	100	4.49643e-16	3.59486e-16	0.980391	0.593664	3.9087e-16			20.75	22.89			133	112.5	154.4		16.76
TRUE	High	Master Protein	Q17RY0	Cytoplasmic polyadenylation element-binding protein 4 OS=Homo sapiens OX=9606 GN=CPEB4 PE=1 SV=1	0.002	FALSE	4.476	2	1	1	1	1	729	80.1	7.18	1.95	1	cell communication;metabolic process;regulation of biological process;response to stimulus	cytoplasm;endoplasmic reticulum;membrane;nucleus	metal ion binding;protein binding;RNA binding;translation regulator activity	Pf00076, Pf14259	80315	ENSG00000113742.12	CPEB4	5	Dorso-ventral axis formation; Progesterone-mediated oocyte maturation; Oocyte meiosis		0	100	100	1.161	1.372	100	4.49643e-16	3.59486e-16	0.980391	0.593664	3.9087e-16			20.75	22.89			133	112.5	154.4		16.76
FALSE	High	Master Protein	Q9P0T7	Transmembrane protein 9 OS=Homo sapiens OX=9606 GN=TMEM9 PE=1 SV=1	0	FALSE	18.52	22	2	5	2	1	183	20.6	6.65	26.09	2	transport	endosome;membrane;vacuole		Pf05434	252839	ENSG00000116857.16	TMEM9	1			0	0.946	1.013	1.375	1.372	2.38	0.989869	0.997752	0.50149	0.0958147	2.20356e-07	19.61	21.68	0	34.41	82.02	113.1	99.1	122.4	65.4	19.03
FALSE	Low	Master Protein	Q9P2N7	Kelch-like protein 13 OS=Homo sapiens OX=9606 GN=KLHL13 PE=1 SV=3	0.103	FALSE	1.329	2	1	1	1	1	655	73.8	6.62	0	1	cell division;metabolic process	cytosol	catalytic activity;protein binding	Pf00651, Pf01344, Pf07646, Pf07707, Pf13415, Pf13418, Pf13854, Pf13964	90293	ENSG00000003096.14	KLHL13	X	Ubiquitin mediated proteolysis		0	0.982	0.821	1.069	1.372	1.159	0.991136	0.909091	0.999979	0.605817	0.965003	39.28	19.13	62.53	6.83	28.36	108.3	77.2	89	125.6	31.63	33.42
FALSE	Low	Master Protein Candidate	Q9P2J3	Kelch-like protein 9 OS=Homo sapiens OX=9606 GN=KLHL9 PE=1 SV=2	0.103	FALSE	1.329	2	1	1	1	1	617	69.4	6.35	0	1	cell division;metabolic process	cytosol	catalytic activity;protein binding	Pf00651, Pf01344, Pf07646, Pf07707, Pf13415, Pf13418, Pf13854, Pf13964	55958	ENSG00000198642.6	KLHL9	9	Ubiquitin mediated proteolysis		0	0.982	0.821	1.069	1.372	1.159	0.991136	0.909091	0.999979	0.605817	0.965003	39.28	19.13	62.53	6.83	28.36	108.3	77.2	89	125.6	31.63	33.42
FALSE	High	None	Q9HC84	Mucin-5B OS=Homo sapiens OX=9606 GN=MUC5B PE=1 SV=3	0	FALSE	11.591	0	2	4	1	1	5762	596	6.64	10.44	2	metabolic process;regulation of biological process;response to stimulus	extracellular;membrane;organelle lumen	protein binding	Pf00007, Pf00093, Pf00094, Pf01826, Pf08742, Pf13330	727897	ENSG00000117983.17	MUC5B	11	Salivary secretion	Lung fibrosis	0	0.742	0.681	1.281	1.372	1.089	0.788954	0.462519	0.864938	0.437963	0.992073	9.07	6.59	46.25	42.83	33.23	113.9	84.5	77.6	124	2.72	55.53
FALSE	High	Master Protein	Q99541	Perilipin-2 OS=Homo sapiens OX=9606 GN=PLIN2 PE=1 SV=2	0	FALSE	33.302	23	6	15	6	1	437	48	6.8	33.1	6	regulation of biological process;response to stimulus;transport	cytoplasm;cytosol;endoplasmic reticulum;extracellular;membrane;nucleus		Pf03036	123	ENSG00000147872.9	PLIN2	9	PPAR signaling pathway	Adipogenesis	0	1.059	1.058	1.07	1.372	1.346	0.865056	0.976381	0.999979	0.00486794	0.232615	72.07	65.18	72.17	44.73	57.5	80.8	94.8	78.2	146.2	41.73	78.39
FALSE	High	Master Protein	P13674	Prolyl 4-hydroxylase subunit alpha-1 OS=Homo sapiens OX=9606 GN=P4HA1 PE=1 SV=2	0	FALSE	120.68	43	16	68	16	1	534	61	6.01	229.51	16	cell organization and biogenesis;metabolic process	endoplasmic reticulum;membrane;mitochondrion;organelle lumen	catalytic activity;metal ion binding;protein binding	Pf03171, Pf08336	5033	ENSG00000122884.12	P4HA1	10	Metabolic pathways; Arginine and proline metabolism		0	1.128	0.909	1.014	1.369	1.175	0.0800497	0.78601	0.91405	2.39126e-05	0.416361	39.08	34.6	57.25	49.6	53.46	91.2	117.4	81.6	109.7	9.08	6.34
FALSE	High	Master Protein	Q5T2E6	Armadillo-like helical domain-containing protein 3 OS=Homo sapiens OX=9606 GN=ARMH3 PE=1 SV=1	0.001	FALSE	6.647	3	1	1	1	1	689	78.7	6.6	3.09	1		membrane	protein binding	Pf08427	79591	ENSG00000120029.12	C10orf76	10			0	1.137	1.108	1.333	1.368	1.516	0.880717	0.96416	0.810422	0.440057	0.49159	27.4	28.6	28.8	35.97	29.69	84	95.5	93.1	127.4	26.79	30.9
FALSE	High	Master Protein	Q9BRU9	rRNA-processing protein UTP23 homolog OS=Homo sapiens OX=9606 GN=UTP23 PE=1 SV=2	0.002	FALSE	5.117	5	1	3	1	1	249	28.4	10.07	5.63	1	metabolic process	nucleus	protein binding;RNA binding	Pf04900	84294	ENSG00000147679.11	UTP23	8			0	0.955	0.827	0.983	1.368	0.901	0.999984	0.913249	0.972282	0.643745	0.943779	42.84	49.08	17.43	50.81	20.99	113.8	108.7	74.9	102.5	54.03	40.76
FALSE	High	Master Protein	Q96HY7	Probable 2-oxoglutarate dehydrogenase E1 component DHKTD1, mitochondrial OS=Homo sapiens OX=9606 GN=DHTKD1 PE=1 SV=2	0	FALSE	27.02	9	4	7	4	1	919	103	6.93	14.87	4	cell differentiation;metabolic process	cytosol;mitochondrion;organelle lumen	catalytic activity	Pf00676, Pf02779	55526	ENSG00000181192.11	DHTKD1	10		Integrated Breast Cancer Pathway	0	0.971	0.967	1.348	1.368	1.099	0.993866	0.962994	0.667253	0.311999	0.982019	65.26	54.8	36.59	54.35	56.71	133	82.3	84.4	100.3	32.09	18.59
FALSE	High	Master Protein	P06703	Protein S100-A6 OS=Homo sapiens OX=9606 GN=S100A6 PE=1 SV=1	0	FALSE	20.417	48	4	17	4	1	90	10.2	5.48	23.66	4	cell organization and biogenesis;regulation of biological process;response to stimulus;transport	cytoplasm;cytosol;extracellular;membrane;nucleus	metal ion binding;protein binding;transporter activity	Pf01023	6277	ENSG00000197956.9	S100A6	1		Gastric cancer network 2; Prostaglandin Synthesis and Regulation	0	0.901	0.69	1.163	1.368	0.998	0.976316	0.567499	0.972282	0.581814	0.992073	31.39	25.81	38.63	49.59	44.59	106.3	96.5	78.2	119.1	119.37	99.9
FALSE	High	None	Q9HCP0	Casein kinase I isoform gamma-1 OS=Homo sapiens OX=9606 GN=CSNK1G1 PE=1 SV=1	0	FALSE	8.502	5	2	9	2	1	422	48.5	9.01	15.45	2	metabolic process;regulation of biological process;response to stimulus;transport	cytoplasm;cytosol;nucleus	catalytic activity;nucleotide binding;protein binding	Pf00069, Pf07714, Pf12605	53944	ENSG00000169118.17	CSNK1G1	15	Hedgehog signaling pathway	Wnt Signaling Pathway Netpath	0	0.935	0.789	1.319	1.367	1.09	0.984931	0.618384	0.63911	0.122379	0.968988	21.68	18.01	34.11	49.63	35.16	115.9	90.2	92.5	101.4	11.55	48.73
FALSE	High	None	O75923	Dysferlin OS=Homo sapiens OX=9606 GN=DYSF PE=1 SV=1	0.002	FALSE	4.626	1	1	1	1	1	2080	237.1	5.64	4.2	1	cell organization and biogenesis	endosome;membrane	metal ion binding;protein binding	Pf00168, Pf06398, Pf08150, Pf08151, Pf08165	8291	ENSG00000135636.13	DYSF	2			0	0.01	1.005	100	1.367	1.373	4.49643e-16	0.998828	4.24865e-16	0.444103	0.700491		21.73		0	21.73	118.4		119	162.6	20.51
FALSE	High	Master Protein	Q9NXA8	NAD-dependent protein deacylase sirtuin-5, mitochondrial OS=Homo sapiens OX=9606 GN=SIRT5 PE=1 SV=2	0	FALSE	9.59	9	2	2	2	1	310	33.9	8.47	5.36	2	cell organization and biogenesis;metabolic process;regulation of biological process;response to stimulus	cytoplasm;cytosol;mitochondrion;nucleus;organelle lumen	catalytic activity;metal ion binding;nucleotide binding	Pf02146, Pf02233	23408	ENSG00000124523.15	SIRT5	6		NAD+ metabolism; NAD+ biosynthetic pathways	0	0.708	1.027	1.701	1.366	1.365	0.404408	0.999797	0.0554061	0.257433	0.456661	34.14	12.65	29.14	16.43	24.91	101.2	86.4	78.3	134.1	26.75	55.57
FALSE	High	Master Protein	P21217	Galactoside 3(4)-L-fucosyltransferase OS=Homo sapiens OX=9606 GN=FUT3 PE=2 SV=1	0	FALSE	51.038	32	8	40	8	1	361	42.1	9.01	125.24	8	metabolic process	Golgi;membrane	catalytic activity	Pf00852	2525		FUT3	19	Glycosphingolipid biosynthesis - lacto and neolacto series; Metabolic pathways		0	1.134	0.943	1.044	1.365	1.258	0.353015	0.899456	0.980391	0.00101663	0.280669	35.93	31.32	45.89	36.24	20.26	87	121.4	80.6	111	10.31	20.44
FALSE	High	Master Protein	Q06609	DNA repair protein RAD51 homolog 1 OS=Homo sapiens OX=9606 GN=RAD51 PE=1 SV=1	0.002	FALSE	5.002	9	2	2	2	1	339	36.9	5.6	0	2	cell organization and biogenesis;metabolic process;regulation of biological process;response to stimulus	chromosome;cytoplasm;cytoskeleton;cytosol;mitochondrion;nucleus;organelle lumen	catalytic activity;DNA binding;nucleotide binding;protein binding	Pf08423, Pf13481, Pf14520	5888	ENSG00000051180.16	RAD51	15	Pancreatic cancer; Homologous recombination; Fanconi anemia pathway; Pathways in cancer	Rac1/Pak1/p38/MMP-2 pathway; miRNA Regulation of DNA Damage Response; Homologous recombination; ATM Signaling Pathway; DNA Damage Response	0	0.772	0.817	1.117	1.365	0.862	0.864619	0.909091	0.999979	0.642806	0.945239	0	10.65	34.84	44.85	25.88	115.9	89.5	94.7	99.9
FALSE	High	Master Protein Candidate	Q6NT46	G antigen 2A OS=Homo sapiens OX=9606 GN=GAGE2A PE=1 SV=1	0	FALSE	12.133	30	1	12	1	1	116	12.8	4.41	34.54	1				Pf05831	729447	ENSG00000189064.8	GAGE2A	X			0	1.239	1.534	1.445	1.365	2.058	0.195135	0.0381676	0.156997	0.00729763	1.37005e-07	35.64	89.46	28.29	89.62	44.55	85.1	84.8	107.7	122.5	26.62	18.75
FALSE	High	Master Protein	Q4V321	G antigen 13 OS=Homo sapiens OX=9606 GN=GAGE13 PE=3 SV=2	0	FALSE	12.133	30	1	12	1	1	117	12.9	4.22	34.54	1											0	1.239	1.534	1.445	1.365	2.058	0.195135	0.0381676	0.156997	0.00729763	1.37005e-07	35.64	89.46	28.29	89.62	44.55	85.1	84.8	107.7	122.5	26.62	18.75
FALSE	High	Master Protein Candidate	Q9UEU5	G antigen 2D OS=Homo sapiens OX=9606 GN=GAGE2D PE=1 SV=1	0	FALSE	12.133	30	1	12	1	1	116	12.8	4.28	34.54	1	defense response;response to stimulus		protein binding	Pf05831	729408; 100101629; 26749		GAGE2D; GAGE8; GAGE2E	X			0	1.239	1.534	1.445	1.365	2.058	0.195135	0.0381676	0.156997	0.00729763	1.37005e-07	35.64	89.46	28.29	89.62	44.55	85.1	84.8	107.7	122.5	26.62	18.75
FALSE	High	Master Protein Candidate	Q13066	G antigen 2B/2C OS=Homo sapiens OX=9606 GN=GAGE2B PE=1 SV=1	0	FALSE	12.133	30	1	12	1	1	116	12.8	4.37	34.54	1				Pf05831	2574; 729447; 645037		GAGE2C; GAGE2A; GAGE2B	X			0	1.239	1.534	1.445	1.365	2.058	0.195135	0.0381676	0.156997	0.00729763	1.37005e-07	35.64	89.46	28.29	89.62	44.55	85.1	84.8	107.7	122.5	26.62	18.75
FALSE	High	Master Protein	Q9NPD8	Ubiquitin-conjugating enzyme E2 T OS=Homo sapiens OX=9606 GN=UBE2T PE=1 SV=1	0	FALSE	17.619	23	4	5	4	1	197	22.5	7.99	13.79	4	metabolic process;response to stimulus	cytoplasm;nucleus	catalytic activity;nucleotide binding;protein binding	Pf00179, Pf14461	29089	ENSG00000077152.9	UBE2T	1	Fanconi anemia pathway	Gastric cancer network 2	0	0.87	0.844	1.28	1.365	1.098	0.957893	0.896823	0.917634	0.490766	0.986596	76.92	40.88	24.8	36.92	51.44	128.8	71.9	107.2	92.1	58.24	103.43
FALSE	High	Master Protein	Q15796	Mothers against decapentaplegic homolog 2 OS=Homo sapiens OX=9606 GN=SMAD2 PE=1 SV=1	0	FALSE	18.455	10	3	12	1	1	467	52.3	6.58	35.22	3	cell organization and biogenesis;metabolic process;regulation of biological process;response to stimulus;transport	cytoplasm;cytosol;nucleus	DNA binding;metal ion binding;protein binding;RNA binding;signal transducer activity	Pf03165, Pf03166	4087	ENSG00000175387.15	SMAD2	18	Chagas disease (American trypanosomiasis); Endocytosis; TGF-beta signaling pathway; Inflammatory bowel disease (IBD); Pancreatic cancer; FoxO signaling pathway; Hippo signaling pathway; Colorectal cancer; Pathways in cancer; AGE-RAGE signaling pathway in diabetic complications; HTLV-I infection; Proteoglycans in cancer; Adherens junction; Cell cycle; Signaling pathways regulating pluripotency of …	Extracellular vesicle-mediated signaling in recipient cells; TGF-beta Receptor Signaling; Canonical and Non-Canonical TGF-B signaling; Factors and pathways affecting insulin-like growth factor (IGF1)-Akt signaling; Hypothesized Pathways in Pathogenesis of Cardiovascular Disease; Endoderm Differentiation; AGE/RAGE pathway; TGF-beta Signaling Pathway; TGF-B Signaling in Thyroid Cells for Epithelial…	0	1.358	1.084	1.126	1.364	1.331	0.0344721	0.962994	0.957149	0.0891262	0.231849	67.62	102.06	87.48	116.88	57.77	117.3	87.1	39.6	156	52.93	68.7
FALSE	High	Master Protein	Q9UI10	Translation initiation factor eIF-2B subunit delta OS=Homo sapiens OX=9606 GN=EIF2B4 PE=1 SV=2	0	FALSE	27.907	13	4	8	4	1	523	57.5	9.38	23.49	4	metabolic process;regulation of biological process;response to stimulus	cytoplasm;cytosol	protein binding;RNA binding	Pf01008	8890	ENSG00000115211.15	EIF2B4	2	RNA transport	Translation Factors	0	0.891	0.532	0.823	1.364	0.75	0.929654	0.0101872	0.545386	0.238449	0.284068	13.76	10.71	19.93	53.32	13.66	115.6	110.5	98.4	75.4	7.87	12.03
FALSE	High	Master Protein	Q9BYJ9	YTH domain-containing family protein 1 OS=Homo sapiens OX=9606 GN=YTHDF1 PE=1 SV=1	0	FALSE	20.581	13	4	20	2	1	559	60.8	8.79	53.14	4	regulation of biological process	cytoplasm	protein binding;RNA binding	Pf04146	54915	ENSG00000149658.17	YTHDF1	20			0	0.965	0.875	1.19	1.362	1.148	0.999488	0.91416	0.924676	0.437592	0.948374	11.13	34.08	38.97	41.7	39.26	112.4	100.2	68.1	119.2	5.04	11.87
FALSE	High	Master Protein	Q6N063	2-oxoglutarate and iron-dependent oxygenase domain-containing protein 2 OS=Homo sapiens OX=9606 GN=OGFOD2 PE=2 SV=2	0	FALSE	15.038	12	2	6	2	1	350	39	5.68	17.11	2	metabolic process		catalytic activity;metal ion binding	Pf03171	79676	ENSG00000111325.16	OGFOD2	12			0	1.028	0.892	1.195	1.361	1.188	0.97502	0.953754	0.95392	0.573295	0.948374	61.05	54.42	53.81	53.58	74.03	77.5	104.3	84.3	133.9	71.39	6.17
FALSE	High	Master Protein	Q69YL0	Uncharacterized protein NCBP2-AS2 OS=Homo sapiens OX=9606 GN=NCBP2-AS2 PE=1 SV=1	0	FALSE	12.781	38	3	5	3	1	99	10.9	12	15.2	3					152217	ENSG00000270170.1	LOC152217; NCBP2-AS2	3			0	1.171	0.957	1.052	1.36	1.265	0.626525	0.961239	0.998862	0.116762	0.605966	79.72	41.16	74.36	29.57	58.46	74.8	154.2	68.8	102.3	72.07	55.98
TRUE	High	Master Protein	Q15014	Mortality factor 4-like protein 2 OS=Homo sapiens OX=9606 GN=MORF4L2 PE=1 SV=1	0	FALSE	9.18	11	2	6	1	1	288	32.3	9.72	17.89	2	cell organization and biogenesis;metabolic process;regulation of biological process;response to stimulus	membrane;nucleus	protein binding	Pf05712	9643	ENSG00000123562.16	MORF4L2	X			0	3.223	0.497	0.21	1.36	0.676	2.41548e-06	0.244516	8.12685e-11	0.646386	0.602125	0	0	0	0	0	74.1	238.9	36.8	50.1
FALSE	High	Master Protein	Q9H2F3	3 beta-hydroxysteroid dehydrogenase type 7 OS=Homo sapiens OX=9606 GN=HSD3B7 PE=1 SV=2	0.001	FALSE	7.11	7	2	3	2	1	369	41	8.25	1.84	2	cellular component movement;metabolic process;response to stimulus	endoplasmic reticulum;membrane	catalytic activity;protein binding	Pf00106, Pf01073, Pf01370, Pf07993, Pf13460	80270	ENSG00000099377.13	HSD3B7	16	Metabolic pathways; Primary bile acid biosynthesis		0	0.646	1.173	2.047	1.36	1.322	0.454839	0.953754	0.124332	0.643742	0.820914	29.77	0	41.56	0	27.95	90.5	83.8	88.8	137
FALSE	High	Master Protein	O75629	Protein CREG1 OS=Homo sapiens OX=9606 GN=CREG1 PE=1 SV=1	0	FALSE	19.706	18	3	15	3	1	220	24.1	7.59	58.7	3	cell proliferation;development;regulation of biological process;transport	extracellular;organelle lumen	protein binding	Pf13883	8804	ENSG00000143162.7	CREG1	1		Senescence and Autophagy in Cancer	0	1.006	0.435	1.02	1.359	0.799	0.946581	1.14835e-08	0.980391	0.225552	0.186454	97.1	18.62	114.22	106.53	67.61	156.2	150.8	31.5	61.5	63.68	54.33
FALSE	High	Master Protein	O95379	Tumor necrosis factor alpha-induced protein 8 OS=Homo sapiens OX=9606 GN=TNFAIP8 PE=1 SV=1	0	FALSE	16.036	25	2	6	2	1	198	23	7.93	24.05	2	cell death;regulation of biological process	cytoplasm	enzyme regulator activity;protein binding	Pf05527	25816	ENSG00000145779.7	TNFAIP8	5			0	1.609	1.273	1.546	1.356	1.507	0.212841	0.919837	0.72054	0.659206	0.643961	53.11	35.2	46.62	89.29	112.62	102.5	109.1	86.3	102.2	52.09	41.68
FALSE	High	Master Protein	Q9NQP4	Prefoldin subunit 4 OS=Homo sapiens OX=9606 GN=PFDN4 PE=1 SV=1	0	FALSE	22.091	29	4	10	4	1	134	15.3	4.53	22.74	4	metabolic process	cytoplasm;cytosol;mitochondrion;nucleus	protein binding	Pf01920	5203	ENSG00000101132.9	PFDN4	20			0	1.075	1.358	1.178	1.355	1.179	0.823401	0.294796	0.886164	0.0881166	0.754516	61.38	97.96	108.25	103.22	109.17	89.8	123.8	96.2	90.2	31.97	30.32
FALSE	High	Master Protein	Q86U38	Nucleolar protein 9 OS=Homo sapiens OX=9606 GN=NOP9 PE=1 SV=1	0	FALSE	13.351	6	3	6	3	1	636	69.4	7.28	14.64	3			RNA binding		161424	ENSG00000196943.12	NOP9	14			0	0.837	0.574	0.927	1.353	0.776	0.823401	0.0144905	0.862499	0.242416	0.249655	0	0	0	0	0	147.6	96.6	66.2	89.6	34.1
FALSE	High	Master Protein	O94830	Phospholipase DDHD2 OS=Homo sapiens OX=9606 GN=DDHD2 PE=1 SV=2	0.001	FALSE	6.367	2	1	2	1	1	711	81	5.39	5.89	1	cell organization and biogenesis;metabolic process;regulation of biological process;response to stimulus;transport	cytoplasm;cytosol;Golgi;membrane	catalytic activity;metal ion binding;protein binding	Pf00536, Pf02825, Pf02862	23259	ENSG00000085788.13	DDHD2	8			0	1.026	0.751	0.991	1.352	1.016	0.970312	0.753516	0.972282	0.533863	0.995078	0	20.09	0	35.57	0	105.4	108.1	79.2	107.2
FALSE	Medium	None	Q9C010	cAMP-dependent protein kinase inhibitor beta OS=Homo sapiens OX=9606 GN=PKIB PE=3 SV=1	0.027	FALSE	2.412	9	1	3	1	1	78	8.5	4.88	3.43	1	regulation of biological process	cytoplasm;nucleus	enzyme regulator activity	Pf02827	5570	ENSG00000135549.14	PKIB	6		Calcium Regulation in the Cardiac Cell; Myometrial Relaxation and Contraction Pathways	0	0.747	0.712	1.288	1.352	0.962	0.823401	0.796014	0.93075	0.666045	0.992073	23.15	33.62	39.85	52.4	8.82	115.7	86.4	82.3	115.6	69.8	65.45
FALSE	High	Master Protein	Q9H1A4	Anaphase-promoting complex subunit 1 OS=Homo sapiens OX=9606 GN=ANAPC1 PE=1 SV=1	0	FALSE	18.034	3	3	5	3	1	1944	216.4	6.3	15.59	3	cell division;metabolic process;regulation of biological process	cytosol;nucleus		Pf01851, Pf12859	64682	ENSG00000153107.11	ANAPC1	2	Ubiquitin mediated proteolysis; Progesterone-mediated oocyte maturation; HTLV-I infection; Oocyte meiosis; Cell cycle		0	0.818	0.709	1.088	1.352	0.937	0.790676	0.252889	0.998862	0.250102	0.920916	23.28	41.63	35.16	61.4	56.51	98.6	98.1	110.4	93	61.29	57.57
FALSE	High	None	Q9UHL0	ATP-dependent RNA helicase DDX25 OS=Homo sapiens OX=9606 GN=DDX25 PE=1 SV=2	0.001	FALSE	6.819	2	1	14	1	1	483	54.7	6.28	42.92	1	cell differentiation;development;metabolic process;regulation of biological process;transport	cytoplasm;nucleus;spliceosomal complex	catalytic activity;nucleotide binding;RNA binding	Pf00270, Pf00271	29118	ENSG00000109832.13	DDX25	11			0	1.644	1.062	0.93	1.349	1.529	0.00265621	0.990871	0.85759	0.142877	0.075276	64.42	25.17	50.54	10.7	14.25	75.4	123.9	85.5	115.3	11.79	53.2
FALSE	High	Master Protein	Q9NP66	High mobility group protein 20A OS=Homo sapiens OX=9606 GN=HMG20A PE=1 SV=1	0.001	FALSE	5.886	3	1	4	1	1	347	40.1	6.49	13.24	1	cell organization and biogenesis;metabolic process;regulation of biological process	nucleus	DNA binding;protein binding	Pf00505, Pf09011	10363	ENSG00000140382.14	HMG20A	15			0	0.832	0.857	1.387	1.346	1.154	0.922275	0.928105	0.803434	0.605817	0.962734	0	0	0	0	0	104.1	86.6	89.2	120.1
FALSE	High	Master Protein	P0DMN0	Sulfotransferase 1A4 OS=Homo sapiens OX=9606 GN=SULT1A4 PE=1 SV=1	0	FALSE	64.308	35	8	47	1	1	295	34.2	6.01	147.84	8	metabolic process;regulation of biological process;response to stimulus	cytoplasm;cytosol	catalytic activity;protein binding	Pf00685, Pf13469	445329; 6818; 100526830; 105369243	ENSG00000213648.10; ENSG00000261052.5	SULT1A4; LOC101929857; LOC101060714; SULT1A3; SLX1A-SULT1A3; LOC105369243	16	Chemical carcinogenesis	Sulfation Biotransformation Reaction; Metapathway biotransformation	0	1.432	0.794	0.746	1.345	1.068	0.468391	0.855697	0.516736	0.605961	0.992073	0	0	0	0	0	93.2	133.4	74	99.5
FALSE	High	Master Protein	Q86UE8	Serine/threonine-protein kinase tousled-like 2 OS=Homo sapiens OX=9606 GN=TLK2 PE=1 SV=2	0.002	FALSE	4.728	5	2	4	1	1	772	87.6	8.41	4.26	2	cell organization and biogenesis;metabolic process;regulation of biological process;response to stimulus	cytoplasm;cytoskeleton;nucleus	catalytic activity;nucleotide binding;protein binding	Pf00069, Pf07714	11011	ENSG00000146872.17	TLK2	17		DNA Damage Response; miRNA Regulation of DNA Damage Response	0	0.537	0.727	1.818	1.343	0.977	0.123185	0.81043	0.313692	0.688674	0.992073	0	0	0	0	0	123.4	66.3	89.8	120.5
FALSE	High	Master Protein	P22681	E3 ubiquitin-protein ligase CBL OS=Homo sapiens OX=9606 GN=CBL PE=1 SV=2	0	FALSE	9.776	3	1	5	1	1	906	99.6	6.54	14.79	1	cell death;cell organization and biogenesis;metabolic process;regulation of biological process;response to stimulus;transport	cytoplasm;cytosol;membrane;nucleus;vacuole	catalytic activity;metal ion binding;protein binding;signal transducer activity	Pf00097, Pf00627, Pf02262, Pf02761, Pf02762, Pf13639, Pf13920, Pf13923, Pf14447, Pf14634, Pf15227	867	ENSG00000110395.6	CBL	11	Endocytosis; T cell receptor signaling pathway; Insulin signaling pathway; Ubiquitin mediated proteolysis; Chronic myeloid leukemia; ErbB signaling pathway; Pathways in cancer; Proteoglycans in cancer; Bacterial invasion of epithelial cells	IL-2 Signaling Pathway; T-Cell antigen Receptor (TCR) pathway during Staphylococcus aureus infection; Signaling Pathways in Glioblastoma; Angiopoietin Like Protein 8 Regulatory Pathway; Prolactin Signaling Pathway; Interferon type I signaling pathways; EGF/EGFR Signaling Pathway; Kit receptor signaling pathway; T-Cell antigen Receptor (TCR) Signaling Pathway; B Cell Receptor Signaling Pathway; As…	0	0.704	0.602	1.054	1.341	0.742	0.650791	0.294796	0.998862	0.607987	0.618082	10.54	11.54	52.33	52.41	29.74	129.2	91	84	95.9	18.32	22.8
FALSE	High	Master Protein	P51808	Dynein light chain Tctex-type 3 OS=Homo sapiens OX=9606 GN=DYNLT3 PE=1 SV=1	0	FALSE	23.456	44	2	8	2	1	116	13.1	5.66	38.53	2	cell division;regulation of biological process;transport	chromosome;cytoplasm;cytoskeleton;nucleus	catalytic activity;motor activity;protein binding	Pf03645	6990	ENSG00000165169.10	DYNLT3	X			0	1.377	0.687	0.986	1.341	0.869	0.344113	0.451478	0.971175	0.462717	0.781943	85.04	20.74	66.84	49	12.43	95	67.4	104	133.6	98.42	95.13
FALSE	High	Master Protein	Q8NG11	Tetraspanin-14 OS=Homo sapiens OX=9606 GN=TSPAN14 PE=1 SV=1	0	FALSE	9.776	10	2	8	2	1	270	30.7	6.84	24.49	2	cell organization and biogenesis;metabolic process;regulation of biological process;transport	membrane	protein binding	Pf00335	81619	ENSG00000108219.14	TSPAN14	10			0	0.467	0.63	1.808	1.341	0.845	0.0282897	0.309264	0.162486	0.588786	0.845344	2.53	6.69	11.18	16.29	4.48	136	63.5	85.7	114.9	1.09	11.09
FALSE	High	Master Protein	Q13546	Receptor-interacting serine/threonine-protein kinase 1 OS=Homo sapiens OX=9606 GN=RIPK1 PE=1 SV=3	0	FALSE	24.895	9	4	10	4	1	671	75.9	6.33	32.91	4	cell death;cell organization and biogenesis;metabolic process;regulation of biological process;response to stimulus	cytoplasm;cytosol;membrane;mitochondrion	catalytic activity;nucleotide binding;protein binding;signal transducer activity	Pf00069, Pf00531, Pf07714, Pf12721	8737	ENSG00000137275.13	RIPK1	6	TNF signaling pathway; NOD-like receptor signaling pathway; Epstein-Barr virus infection; NF-kappa B signaling pathway; Apoptosis; Cytosolic DNA-sensing pathway; Toll-like receptor signaling pathway; Hepatitis C; RIG-I-like receptor signaling pathway	TNF related weak inducer of apoptosis (TWEAK) Signaling Pathway; Regulation of toll-like receptor signaling pathway; Apoptosis Modulation by HSP70; TNF alpha Signaling Pathway; RIG-I-like Receptor Signaling; Apoptosis Modulation and Signaling; p38 MAPK Signaling Pathway; Apoptosis; Toll-like receptor signaling pathway; Nanoparticle triggered regulated necrosis	0	0.955	0.823	1.234	1.341	1.196	0.999984	0.630249	0.7659	0.121911	0.705014	49.02	26.3	44.38	49.82	40.16	85.6	94.1	95.1	125.2	35.13	30.03
FALSE	High	Master Protein	Q5VTQ0	Tetratricopeptide repeat protein 39B OS=Homo sapiens OX=9606 GN=TTC39B PE=1 SV=4	0.007	FALSE	3.543	2	1	1	1	1	682	76.9	7.39	2.82	1			protein binding	Pf10300, Pf13424	158219	ENSG00000155158.20	TTC39B	9			0	0.926	0.498	0.721	1.341	0.667	0.991136	0.108753	0.503703	0.705238	0.332149	23.89	5.42	15.73	31.53	16.14	129.4	119.8	64.4	86.4	1.29	26.34
FALSE	High	Master Protein	Q14186	Transcription factor Dp-1 OS=Homo sapiens OX=9606 GN=TFDP1 PE=1 SV=1	0	FALSE	9.263	4	1	4	1	1	410	45	6.05	15.63	1	cell death;cell proliferation;metabolic process;regulation of biological process;response to stimulus	cytoplasm;cytosol;mitochondrion;nucleus	DNA binding;protein binding	Pf02319, Pf08781	7027	ENSG00000198176.12	TFDP1	13	TGF-beta signaling pathway; Cell cycle	Retinoblastoma (RB) in Cancer; Cell Cycle; TGF-beta Signaling Pathway; G1 to S cell cycle control	0	0.806	0.682	1.133	1.341	0.882	0.726228	0.168285	0.972282	0.274437	0.72056	18.99	13.67	30.97	38.35	28.87	121.1	93.6	79.1	106.1	27.47	20.53
FALSE	Medium	None	P02585	Troponin C, skeletal muscle OS=Homo sapiens OX=9606 GN=TNNC2 PE=1 SV=2	0.033	FALSE	2.212	4	1	5	1	1	160	18.1	4.2	0	1	cellular component movement;regulation of biological process	cytosol	metal ion binding;protein binding	Pf00036, Pf13202, Pf13405, Pf13499, Pf13833	7125	ENSG00000101470.9	TNNC2	20	Calcium signaling pathway	Striated Muscle Contraction	0	1.116	1.51	1.783	1.339	1.692	0.874696	0.77319	0.348989	0.660551	0.36171	24.02	42.14	33.84	36.28	13.66	76.2	85.1	112.3	126.3	7.24	22.39
FALSE	Medium	None	P27482	Calmodulin-like protein 3 OS=Homo sapiens OX=9606 GN=CALML3 PE=1 SV=2	0.033	FALSE	2.212	5	1	5	1	1	149	16.9	4.42	0	1			metal ion binding;protein binding	Pf00036, Pf08726, Pf13202, Pf13405, Pf13499, Pf13833	810	ENSG00000178363.4	CALML3	10	Dopaminergic synapse; Phototransduction; Vascular smooth muscle contraction; Insulin signaling pathway; Amphetamine addiction; cGMP-PKG signaling pathway; Renin secretion; Neurotrophin signaling pathway; Rap1 signaling pathway; Oxytocin signaling pathway; Olfactory transduction; Circadian entrainment; Long-term potentiation; Glioma; Phosphatidylinositol signaling system; Adrenergic signaling in c…	Alzheimers Disease	0	1.116	1.51	1.783	1.339	1.692	0.874696	0.77319	0.348989	0.660551	0.36171	24.02	42.14	33.84	36.28	13.66	76.2	85.1	112.3	126.3	7.24	22.39
FALSE	High	None	Q8N752	Casein kinase I isoform alpha-like OS=Homo sapiens OX=9606 GN=CSNK1A1L PE=2 SV=2	0	FALSE	32.581	18	5	23	5	1	337	39.1	9.45	62.7	5	metabolic process;regulation of biological process;response to stimulus;transport	cytoplasm;cytosol;nucleus	catalytic activity;nucleotide binding	Pf00069, Pf07714	122011	ENSG00000180138.7	CSNK1A1L	13	Breast cancer; Wnt signaling pathway; Hedgehog signaling pathway		0	1.025	1.024	1.118	1.337	1.118	0.897084	0.999797	0.959974	0.0721269	0.921277	38.57	57.87	29.1	41.29	33.92	77.8	175.6	73.3	73.3	21.61	58.85
FALSE	High	Master Protein	Q9H4I3	TraB domain-containing protein OS=Homo sapiens OX=9606 GN=TRABD PE=1 SV=1	0	FALSE	37.617	20	5	25	5	1	376	42.3	8	80.04	5				Pf01963	80305	ENSG00000170638.9	TRABD	22			0	1.035	0.917	1.187	1.336	1.23	0.90248	0.87405	0.797604	0.0198073	0.634821	39.03	42.39	35.06	81.77	28.17	92.8	107.6	90.5	109	29.4	17.1
FALSE	High	Master Protein	Q9BYG5	Partitioning defective 6 homolog beta OS=Homo sapiens OX=9606 GN=PARD6B PE=1 SV=1	0.001	FALSE	6.496	6	2	5	2	1	372	41.2	5.58	8.82	2	cell division;cell organization and biogenesis;regulation of biological process	cytoplasm;cytosol;membrane;nucleus	protein binding	Pf00564, Pf00595	84612	ENSG00000124171.8	PARD6B	20	Endocytosis; Tight junction; Hippo signaling pathway; Rap1 signaling pathway; Axon guidance		0	1.076	0.615	0.961	1.334	1.034	0.944303	0.270914	0.943982	0.593664	0.999858	79.87	33.58	25.3	14.29	50.09	98.3	105.8	94.3	101.6	35.7	35.64
TRUE	Low	Master Protein	Q8J025	Protein APCDD1 OS=Homo sapiens OX=9606 GN=APCDD1 PE=1 SV=1	0.072	FALSE	1.597	3	1	2	1	1	514	58.8	8.15	0	1	cellular component movement;regulation of biological process;response to stimulus	membrane	protein binding	Pf14921	147495	ENSG00000154856.12	APCDD1	18			0	100	100	0.983	1.334	100	4.49643e-16	3.59486e-16	0.972282	0.608413	3.9087e-16			90.12	19.13			147	108.4	144.6		84.95
FALSE	High	Master Protein	P09497	Clathrin light chain B OS=Homo sapiens OX=9606 GN=CLTB PE=1 SV=1	0.002	FALSE	4.519	4	1	3	1	1	229	25.2	4.64	8.86	1	cell organization and biogenesis;transport	cytosol;membrane	protein binding;structural molecule activity	Pf01086	1212	ENSG00000175416.12	CLTB	5	Lysosome; Endocytosis; Huntington's disease; Endocrine and other factor-regulated calcium reabsorption; Bacterial invasion of epithelial cells; Synaptic vesicle cycle		0	1.128	1.078	1.275	1.334	1.438	0.886398	0.976381	0.850066	0.501061	0.458584	88.16	88.76	83.47	92.31	64.94	86.1	97.2	92.8	123.9	102.9	73.78
FALSE	High	Master Protein	Q9NX24	H/ACA ribonucleoprotein complex subunit 2 OS=Homo sapiens OX=9606 GN=NHP2 PE=1 SV=1	0	FALSE	8.31	29	2	4	2	1	153	17.2	8.22	12.62	2	cell organization and biogenesis;metabolic process	nucleus	protein binding;RNA binding	Pf01248	55651	ENSG00000145912.8	NHP2	5	Ribosome biogenesis in eukaryotes		0	0.727	0.337	0.909	1.334	0.82	0.326106	3.99259e-07	0.868851	0.593664	0.561692	56.29	8.29	65.67	35.29	53.17	204.3	102.5	37.7	55.5	91.95	86.55
FALSE	High	Master Protein	Q5JTW2	Centrosomal protein of 78 kDa OS=Homo sapiens OX=9606 GN=CEP78 PE=1 SV=1	0.001	FALSE	6.268	2	1	1	1	1	689	76.3	8.18	2.81	1	cell organization and biogenesis;regulation of biological process	cytoplasm;cytoskeleton;cytosol	protein binding		84131	ENSG00000148019.12	CEP78	9			0	0.523	0.744	1.898	1.334	0.992	0.102138	0.750253	0.178718	0.566601	0.992073	14.46	0	52.89	0	0	122.7	64.2	91.3	121.8		47.51
FALSE	High	Master Protein	Q587I9	Vesicle transport protein SFT2C OS=Homo sapiens OX=9606 GN=SFT2D3 PE=2 SV=1	0	FALSE	10.794	15	2	2	2	1	215	21.8	9.89	2.81	2	transport	membrane			84826	ENSG00000173349.5	SFT2D3	2			0	0.891	1.052	1.563	1.334	1.315	0.97502	0.986921	0.3599	0.593664	0.785859	19.22	16.29	27.3	32.02	43.02	100.7	110.8	62.7	125.9	31.19	42.33
FALSE	High	Master Protein	Q9Y618	Nuclear receptor corepressor 2 OS=Homo sapiens OX=9606 GN=NCOR2 PE=1 SV=3	0.002	FALSE	4.812	1	1	4	1	1	2514	273.5	7.59	9.5	1											0	0.795	0.823	1.367	1.333	1.086	0.857913	0.883125	0.743662	0.526013	0.986596	2.26	8.34	20.1	19.77	18.28	108.5	86.3	87.3	117.9	6	5.5
FALSE	High	Master Protein	Q7RTS9	Dymeclin OS=Homo sapiens OX=9606 GN=DYM PE=1 SV=1	0	FALSE	10.124	6	2	5	2	1	669	75.9	5.86	8.32	2	cell organization and biogenesis	cytoplasm;Golgi;membrane	protein binding	Pf09742, Pf12722	54808	ENSG00000141627.13	DYM	18			0	1.053	1.56	1.2	1.332	1.959	0.958884	0.640037	0.951387	0.608951	0.0674563	87.31	52.75	81.22	45.58	44.31	53.7	144.8	94	107.4	68.96	64.28
FALSE	High	Master Protein	Q969Q5	Ras-related protein Rab-24 OS=Homo sapiens OX=9606 GN=RAB24 PE=1 SV=1	0.005	FALSE	3.786	7	1	2	1	1	203	23.1	6.23	1.67	1	metabolic process;regulation of biological process;response to stimulus;transport	cytoplasm;cytosol;membrane;mitochondrion;vacuole	catalytic activity;nucleotide binding;protein binding	Pf00025, Pf00071, Pf08477	53917	ENSG00000169228.13	RAB24	5			0	0.915	0.958	1.508	1.33	0.942	0.987056	0.98192	0.678361	0.642194	0.968988	44.38	37.68	80.22	81.07	61.04	92.4	84.5	95.8	127.4	63.56	33.81
FALSE	High	Master Protein	Q9Y399	28S ribosomal protein S2, mitochondrial OS=Homo sapiens OX=9606 GN=MRPS2 PE=1 SV=1	0	FALSE	41.737	35	7	28	7	1	296	33.2	9.26	74.84	7	cell organization and biogenesis;metabolic process	membrane;mitochondrion;ribosome	structural molecule activity	Pf00318	51116	ENSG00000122140.10	MRPS2	9	Ribosome		0	0.823	0.79	1.232	1.33	0.97	0.50002	0.386148	0.696747	0.076917	0.961714	21.93	24.39	62.15	45.38	52.49	128.8	104.5	47.2	119.6	45.11	26.28
FALSE	High	Master Protein	Q9NV88	Integrator complex subunit 9 OS=Homo sapiens OX=9606 GN=INTS9 PE=1 SV=2	0.001	FALSE	7.422	6	2	4	2	1	658	73.8	6.33	9.67	2	metabolic process	cytosol;nucleus	protein binding	Pf10996	55756	ENSG00000104299.14	INTS9	8			0	2.053	2.37	1.535	1.33	3.151	0.0140203	0.0113954	0.467829	0.50477	3.25654e-05	139.53	147.06	7.79	0	147.06	46.7	95.8	110.6	147	99.59	7.42
FALSE	High	None	Q6KB66	Keratin, type II cytoskeletal 80 OS=Homo sapiens OX=9606 GN=KRT80 PE=1 SV=2	0	TRUE	14.034	3	2	21	0	2	452	50.5	5.67	58.46	2	cell death;regulation of biological process;transport	cytoplasm;cytoskeleton;cytosol	protein binding;structural molecule activity;transporter activity	Pf00038, Pf01496, Pf05557, Pf12128, Pf13166	144501	ENSG00000167767.13	KRT80	12			0	0.928	0.765	0.978	1.33	0.918	0.946581	0.0578242	0.782696	2.72104e-05	0.696276	52.89	25.54	67.39	45.6	47.02	101.4	123.7	74.2	100.7	32.19	18.99
FALSE	High	None	P14136	Glial fibrillary acidic protein OS=Homo sapiens OX=9606 GN=GFAP PE=1 SV=1	0	TRUE	14.034	3	2	21	0	2	432	49.9	5.52	58.46	2	cell differentiation;cell organization and biogenesis;regulation of biological process;response to stimulus;transport	cytoplasm;cytoskeleton;cytosol;membrane;vacuole	catalytic activity;motor activity;protein binding;structural molecule activity;transporter activity	Pf00038, Pf01496, Pf01576, Pf04732, Pf05761, Pf12128, Pf13270	2670	ENSG00000131095.12	GFAP	17	Jak-STAT signaling pathway	Neural Crest Differentiation; Spinal Cord Injury	0	0.928	0.765	0.978	1.33	0.918	0.946581	0.0578242	0.782696	2.72104e-05	0.696276	52.89	25.54	67.39	45.6	47.02	101.4	123.7	74.2	100.7	32.19	18.99
FALSE	High	Master Protein	Q9UKR5	Probable ergosterol biosynthetic protein 28 OS=Homo sapiens OX=9606 GN=ERG28 PE=1 SV=1	0.001	FALSE	6.91	9	1	3	1	1	140	15.9	9.83	9.95	1	metabolic process	endoplasmic reticulum;membrane	protein binding	Pf03694	11161	ENSG00000133935.6	C14orf1; ERG28	14			0	0.449	0.288	0.852	1.327	0.383	5.96729e-05	3.60318e-07	0.811455	0.641311	4.06389e-07	0	0	0	0	0	188.7	84.7	54.4	72.2
FALSE	High	None	Q11128	Alpha-(1,3)-fucosyltransferase 5 OS=Homo sapiens OX=9606 GN=FUT5 PE=2 SV=1	0	FALSE	42.914	21	6	38	6	1	374	43	8.28	119.97	6	metabolic process	Golgi;membrane	catalytic activity	Pf00852	2527		FUT5	19	Glycosphingolipid biosynthesis - lacto and neolacto series; Metabolic pathways		0	1.196	0.953	0.961	1.327	1.257	0.119693	0.906212	0.760299	0.00464974	0.263887	36.15	30.2	37.39	28.19	19.85	87.7	121.7	86.8	103.8	6.95	19.2
FALSE	High	None	P51993	Alpha-(1,3)-fucosyltransferase 6 OS=Homo sapiens OX=9606 GN=FUT6 PE=1 SV=1	0	FALSE	42.914	21	6	38	6	1	359	41.8	8.68	119.97	6	metabolic process	Golgi;membrane	catalytic activity	Pf00852	2528	ENSG00000156413.13	FUT6	19	Glycosphingolipid biosynthesis - lacto and neolacto series; Metabolic pathways		0	1.196	0.953	0.961	1.327	1.257	0.119693	0.906212	0.760299	0.00464974	0.263887	36.15	30.2	37.39	28.19	19.85	87.7	121.7	86.8	103.8	6.95	19.2
TRUE	High	Master Protein	Q96NY7	Chloride intracellular channel protein 6 OS=Homo sapiens OX=9606 GN=CLIC6 PE=2 SV=3	0	FALSE	9.456	2	1	10	1	1	704	73	4.37	26.41	1	metabolic process;regulation of biological process;transport	cytoplasm;membrane;nucleus	catalytic activity;protein binding;transporter activity	Pf00043, Pf13409, Pf13410, Pf13417, Pf14497	54102	ENSG00000159212.12	CLIC6	21			0	2.334	1.133	0.576	1.326	1.346	8.23707e-09	0.957641	0.000931377	0.243232	0.510684	107.91	18.65	20.75	50.79	25.74	68.8	160.6	78	92.6	8.36	75.29
FALSE	High	Master Protein Candidate	Q9NZA1	Chloride intracellular channel protein 5 OS=Homo sapiens OX=9606 GN=CLIC5 PE=1 SV=3	0	FALSE	9.456	4	1	10	1	1	410	46.5	4.82	26.41	1	cell organization and biogenesis;metabolic process;regulation of biological process;transport	cytoplasm;cytoskeleton;Golgi;membrane;nucleus	catalytic activity;protein binding;transporter activity	Pf13409, Pf13410, Pf13417	53405	ENSG00000112782.15	CLIC5	6			0	2.334	1.133	0.576	1.326	1.346	8.23707e-09	0.957641	0.000931377	0.243232	0.510684	107.91	18.65	20.75	50.79	25.74	68.8	160.6	78	92.6	8.36	75.29
FALSE	High	Master Protein	Q9NR12	PDZ and LIM domain protein 7 OS=Homo sapiens OX=9606 GN=PDLIM7 PE=1 SV=1	0.001	FALSE	5.825	5	2	2	2	1	457	49.8	8.41	3.72	2	cell differentiation;cell organization and biogenesis;cellular component movement;development;regulation of biological process;transport	cytoplasm;cytoskeleton;cytosol;nucleus	metal ion binding;protein binding	Pf00412, Pf00595	9260	ENSG00000196923.13	PDLIM7	5		EBV LMP1 signaling	0	1.105	0.751	1.047	1.326	1.063	0.860259	0.470835	0.998862	0.312387	0.995078	34.56	41.54	34.78	36.06	29.13	103.7	104.5	82.5	109.4	27.48	37.12
FALSE	High	Master Protein	Q7Z7L7	Protein zer-1 homolog OS=Homo sapiens OX=9606 GN=ZER1 PE=1 SV=1	0.003	FALSE	4.15	1	1	1	1	1	766	88.1	5.62	2.52	1	metabolic process;regulation of biological process		catalytic activity;protein binding		10444	ENSG00000160445.10	ZER1	9			0	0.01	0.816	100	1.326	1.081	4.49643e-16	0.906212	4.24865e-16	0.703505	0.992073		37.18		73.47	52.92	138.1		112.6	149.3	52.69
FALSE	High	Master Protein	Q9UK76	Jupiter microtubule associated homolog 1 OS=Homo sapiens OX=9606 GN=JPT1 PE=1 SV=3	0	FALSE	67.355	75	6	27	6	1	154	16	5.6	111.08	6		cytoplasm;membrane;nucleus			51155	ENSG00000189159.15	HN1; JPT1	17			0	0.933	1.055	1.498	1.325	1.465	0.987056	0.98131	0.162242	0.135103	0.106429	93.6	120.92	124.9	125.56	125.72	60.9	117.8	133.1	88.3	135.74	95.18
FALSE	High	Master Protein	O95817	BAG family molecular chaperone regulator 3 OS=Homo sapiens OX=9606 GN=BAG3 PE=1 SV=3	0	FALSE	58.352	26	7	21	7	1	575	61.6	6.95	75.99	7	cell death;metabolic process;regulation of biological process;response to stimulus	cytoplasm;cytosol;membrane;nucleus	enzyme regulator activity;nucleotide binding;protein binding	Pf00397, Pf02179	9531	ENSG00000151929.9	BAG3	10			0	0.997	0.858	1.031	1.324	1.027	0.970312	0.77319	0.985154	0.0617258	0.999858	56.62	27.42	67.87	29.84	62.64	51.8	141.4	92.3	114.6	125.2	80.7
FALSE	High	Master Protein	Q13610	Periodic tryptophan protein 1 homolog OS=Homo sapiens OX=9606 GN=PWP1 PE=1 SV=1	0	FALSE	17.401	12	3	9	3	1	501	55.8	4.77	31.6	3	cell organization and biogenesis;metabolic process;regulation of biological process	Golgi;nucleus	protein binding	Pf00400	11137	ENSG00000136045.11	PWP1	12			0	0.398	0.856	2.411	1.323	1.133	4.39789e-11	0.672468	6.19309e-07	0.0919065	0.874045	12.28	6.95	62.97	27.15	30.52	137.6	35.9	120.1	106.3	0.16	68.79
FALSE	High	None	Q9BQP9	BPI fold-containing family A member 3 OS=Homo sapiens OX=9606 GN=BPIFA3 PE=2 SV=3	0.009	FALSE	3.23	3	1	4	1	1	254	28.4	6.65	9.04	1		extracellular		Pf01273	128861	ENSG00000131059.11	BPIFA3	20			0	1.008	0.9	1.18	1.322	1.19	0.976122	0.906212	0.918927	0.246649	0.894214	26.42	19.28	35.2	31.73	30.64	97.6	98.4	87.8	116.1	25.96	6.6
FALSE	High	Master Protein	Q12974	Protein tyrosine phosphatase type IVA 2 OS=Homo sapiens OX=9606 GN=PTP4A2 PE=1 SV=1	0	FALSE	45.892	47	5	26	2	1	167	19.1	8.37	69.47	5	metabolic process	cytoplasm;cytosol;endosome;membrane;nucleus	catalytic activity	Pf00102, Pf00782	8073	ENSG00000184007.18	PTP4A2	1			0	0.893	0.797	1.18	1.322	1.054	0.970312	0.855697	0.966559	0.593664	0.995078	21.53	64.56	19.49	49.65	47.04	106.9	95.4	85.1	112.6	74.45	54.22
FALSE	High	Master Protein	Q9HCE6	Rho guanine nucleotide exchange factor 10-like protein OS=Homo sapiens OX=9606 GN=ARHGEF10L PE=1 SV=4	0	FALSE	17.285	6	3	8	3	1	1279	140.3	5.94	18.67	3											0	1.367	1.184	1.022	1.321	1.342	0.146395	0.891593	0.980391	0.146308	0.309913	62.26	48.67	61.47	46.78	45.04	93.2	99.5	91.4	115.9	29.33	43.68
FALSE	High	Master Protein	Q9Y3I1	F-box only protein 7 OS=Homo sapiens OX=9606 GN=FBXO7 PE=1 SV=1	0	FALSE	17.879	12	4	5	4	1	522	58.5	6.55	11.07	4	metabolic process;regulation of biological process;transport	cytoplasm;cytosol;mitochondrion;nucleus	catalytic activity;protein binding	Pf11566, Pf12937	25793	ENSG00000100225.17	FBXO7	22			0	0.869	0.923	1.27	1.321	1.128	0.892407	0.931127	0.72054	0.153444	0.928597	22.22	16.54	24.56	48.29	43.06	99.3	134.2	38.9	127.7	31.41	57.88
FALSE	High	Master Protein	Q4G0N4	NAD kinase 2, mitochondrial OS=Homo sapiens OX=9606 GN=NADK2 PE=1 SV=2	0	FALSE	18.777	9	3	13	3	1	442	49.4	8.18	37.54	3	metabolic process	mitochondrion;organelle lumen	catalytic activity;nucleotide binding;protein binding	Pf00781, Pf01513	133686	ENSG00000152620.12	NADK2; NADKD1	5	Nicotinate and nicotinamide metabolism; Metabolic pathways		0	0.972	1.034	0.884	1.32	1.061	0.997566	0.998828	0.63911	0.0617714	0.98817	62.45	57.89	82.49	71.54	69.62	106	113.9	115.6	64.5	18.92	46.33
FALSE	High	Master Protein	O00189	AP-4 complex subunit mu-1 OS=Homo sapiens OX=9606 GN=AP4M1 PE=1 SV=2	0	FALSE	12.194	6	2	7	2	1	453	49.9	7.2	17.13	2	cell organization and biogenesis;transport	cytosol;endosome;Golgi;membrane;organelle lumen	protein binding	Pf00928	9179	ENSG00000221838.9	AP4M1	7	Lysosome		0	0.941	0.909	1.013	1.319	0.912	0.989542	0.911015	0.980391	0.509242	0.907394	27.92	31.33	31.23	52.82	19	133.5	97.1	91.7	77.6	40.93	40.28
FALSE	High	Master Protein	Q9UBT3	Dickkopf-related protein 4 OS=Homo sapiens OX=9606 GN=DKK4 PE=1 SV=1	0	FALSE	18.669	16	3	7	3	1	224	24.9	8.38	19.39	3	development;regulation of biological process;response to stimulus	extracellular		Pf04706, Pf06607	27121	ENSG00000104371.4	DKK4	8	Wnt signaling pathway	Extracellular vesicle-mediated signaling in recipient cells; EDA Signalling in Hair Follicle Development	0	0.939	0.448	0.693	1.319	0.637	0.989041	4.80695e-06	0.0400911	0.216213	0.00632856	26.22	17.33	19.72	72.21	17.9	133.1	141.7	53.2	72	13.61	84.2
FALSE	High	Master Protein	P08579	U2 small nuclear ribonucleoprotein B'' OS=Homo sapiens OX=9606 GN=SNRPB2 PE=1 SV=1	0	FALSE	61.816	43	8	45	6	1	225	25.5	9.72	150.56	8	metabolic process	nucleus;spliceosomal complex	protein binding;RNA binding	Pf00076, Pf13893, Pf14259	6629	ENSG00000125870.10	SNRPB2	20	Spliceosome	mRNA Processing	2	0.914	0.771	1.098	1.319	0.979	0.940172	0.111359	0.982676	0.00108147	0.950488	19.65	66.75	22.85	67.5	20.18	100.8	97.4	94.6	107.2	13.51	11.46
FALSE	High	Master Protein	P18827	Syndecan-1 OS=Homo sapiens OX=9606 GN=SDC1 PE=1 SV=3	0	FALSE	11.884	12	2	13	2	1	310	32.4	4.63	42.01	2	cellular component movement;defense response;metabolic process;regulation of biological process;response to stimulus	cell surface;extracellular;membrane;organelle lumen	protein binding	Pf01034	6382	ENSG00000115884.10	SDC1	2	Cell adhesion molecules (CAMs); Malaria; Proteoglycans in cancer; ECM-receptor interaction		0	0.998	0.805	0.992	1.317	0.936	0.97502	0.460374	0.926249	0.0689699	0.876633	28.5	19.42	37.03	51.08	36.83	87.4	115.3	86.5	110.8	49.6	39.34
FALSE	High	Master Protein	O95319	CUGBP Elav-like family member 2 OS=Homo sapiens OX=9606 GN=CELF2 PE=1 SV=1	0	FALSE	28.593	9	4	20	3	1	508	54.3	8.76	54.33	4	cell organization and biogenesis;metabolic process;regulation of biological process	cytoplasm;nucleus	RNA binding	Pf00076, Pf13893, Pf14259	10659	ENSG00000048740.18	CELF2	10		mRNA Processing	0	0.886	1.056	1.494	1.315	1.448	0.929654	0.997752	0.388574	0.345745	0.303797	36.4	26.32	59.66	30.34	52.61	96.7	88.1	75.2	139.9	24.31	23.62
FALSE	High	Master Protein	Q96RQ1	Endoplasmic reticulum-Golgi intermediate compartment protein 2 OS=Homo sapiens OX=9606 GN=ERGIC2 PE=1 SV=2	0.001	FALSE	5.714	3	1	6	1	1	377	42.5	6.77	14.08	1	transport	cytoplasm;endoplasmic reticulum;Golgi;membrane;nucleus	protein binding	Pf07970, Pf13850	51290	ENSG00000087502.17	ERGIC2	12			0	0.899	0.751	1.019	1.315	0.881	0.934026	0.443347	0.991683	0.225715	0.728441	19.94	15.02	31.43	25.4	20.17	107.9	97	81	114.1	26.99	21.67
FALSE	High	Master Protein	Q9H814	Phosphorylated adapter RNA export protein OS=Homo sapiens OX=9606 GN=PHAX PE=1 SV=1	0.001	FALSE	7.344	3	1	3	1	1	394	44.4	5.4	10.94	1	metabolic process;transport	cytoplasm;cytosol;nucleus	protein binding;RNA binding	Pf10258	51808	ENSG00000164902.13	PHAX	5	RNA transport		0	0.951	0.983	1.358	1.313	1.291	0.994315	0.974896	0.477462	0.149495	0.445851	0	0	0	0	0	94.7	90	93.1	122.2
FALSE	High	Master Protein	P38936	Cyclin-dependent kinase inhibitor 1 OS=Homo sapiens OX=9606 GN=CDKN1A PE=1 SV=3	0	FALSE	10.095	18	1	1	1	1	164	18.1	8.37	5.02	1	cell communication;metabolic process;regulation of biological process;response to stimulus	cytoplasm;cytosol;nucleus	catalytic activity;enzyme regulator activity;metal ion binding;protein binding	Pf02234	1026	ENSG00000124762.13	CDKN1A	6	Viral carcinogenesis; Hepatitis B; HIF-1 signaling pathway; FoxO signaling pathway; MicroRNAs in cancer; Chronic myeloid leukemia; Epstein-Barr virus infection; Oxytocin signaling pathway; Breast cancer; ErbB signaling pathway; Pathways in cancer; Prostate cancer; Glioma; Melanoma; HTLV-I infection; Jak-STAT signaling pathway; Proteoglycans in cancer; Transcriptional misregulation in cancer; p53 …	DNA Damage Response (only ATM dependent); Cell Cycle; Notch Signaling Pathway; Oxidative Damage; Apoptosis-related network due to altered Notch3 in ovarian cancer; Association Between Physico-Chemical Features and Toxicity Associated Pathways; Aryl Hydrocarbon Receptor; Hepatitis C and Hepatocellular Carcinoma; Integrated Cancer pathway; Primary Focal Segmental Glomerulosclerosis FSGS; AMP-activa…	0	0.921	0.132	0.188	1.313	0.173	0.97502	3.59486e-16	4.24865e-16	0.727987	3.9087e-16	0	0	0	0	0	179.7	165.5	23.7	31.1
TRUE	High	Master Protein	O75676	Ribosomal protein S6 kinase alpha-4 OS=Homo sapiens OX=9606 GN=RPS6KA4 PE=1 SV=1	0	FALSE	16.042	8	3	9	2	1	772	85.6	8.28	19.76	3	cell organization and biogenesis;defense response;metabolic process;regulation of biological process;response to stimulus	cytoplasm;cytosol;nucleus	catalytic activity;metal ion binding;nucleotide binding;protein binding	Pf00069, Pf00433, Pf01163, Pf01636, Pf07714, Pf14531	8986	ENSG00000162302.12	RPS6KA4	11	TNF signaling pathway; MAPK signaling pathway	Interferon type I signaling pathways; Angiopoietin Like Protein 8 Regulatory Pathway; Insulin Signaling	0	1.936	0.211		1.312	0.317	0.00835121	2.97584e-09		0.710394	8.36095e-06	121.73	2.09		94.07	14.58	125.4	169.6	42	63	114.83	5.63
FALSE	High	Master Protein	Q92934	Bcl2-associated agonist of cell death OS=Homo sapiens OX=9606 GN=BAD PE=1 SV=3	0	FALSE	7.605	18	1	3	1	1	168	18.4	7.15	10.89	1	cell death;cell organization and biogenesis;cell proliferation;metabolic process;regulation of biological process;response to stimulus	cytoplasm;cytosol;membrane;mitochondrion	enzyme regulator activity;protein binding	Pf10514	572	ENSG00000002330.13	BAD	11	Viral carcinogenesis; Hepatitis B; Insulin signaling pathway; Pancreatic cancer; cGMP-PKG signaling pathway; Chronic myeloid leukemia; Neurotrophin signaling pathway; VEGF signaling pathway; Acute myeloid leukemia; Non-small cell lung cancer; Endometrial cancer; Colorectal cancer; ErbB signaling pathway; Pathways in cancer; Prostate cancer; Thyroid hormone signaling pathway; Tuberculosis; Melanom…	IL-7 Signaling Pathway; PI3K-AKT-mTOR signaling pathway and therapeutic opportunities; Alzheimers Disease; Amyotrophic lateral sclerosis (ALS); Leptin signaling pathway; IL-4 Signaling Pathway; Focal Adhesion; IL-3 Signaling Pathway; TNF alpha Signaling Pathway; Focal Adhesion-PI3K-Akt-mTOR-signaling pathway; Rac1/Pak1/p38/MMP-2 pathway; DNA Damage Response (only ATM dependent); Brain-Derived Neu…	0	0.718	0.812	1.483	1.312	1.065	0.572876	0.85145	0.497427	0.515877	0.992073	0	0	0	0	0	111.3	79.9	90.3	118.5
FALSE	High	Master Protein	Q6ZT21	Transmembrane protein with metallophosphoesterase domain OS=Homo sapiens OX=9606 GN=TMPPE PE=2 SV=2	0.001	FALSE	7.075	6	1	2	1	1	453	49.4	6.92	7.4	1		membrane	catalytic activity;metal ion binding	Pf00149	643853	ENSG00000188167.8	TMPPE	3			0	0.86	1.856	1.511	1.311	2.574	0.956637	0.255998	0.673634	0.60759	0.00346114	26.17	100.05	77.95	103.73	134.84	63.6	54.7	118	163.7	1.02	111.72
FALSE	High	Master Protein	Q14517	Protocadherin Fat 1 OS=Homo sapiens OX=9606 GN=FAT1 PE=1 SV=2	0	FALSE	71.023	5	15	30	15	1	4588	506	5	60.07	15	cell communication;cell organization and biogenesis;cellular component movement	cell surface;cytoplasm;membrane;nucleus	metal ion binding;protein binding	Pf00008, Pf00028, Pf00054, Pf02210, Pf05444, Pf06247, Pf07645, Pf12947, Pf13385	2195	ENSG00000083857.13	FAT1	4		Primary Focal Segmental Glomerulosclerosis FSGS	0	0.85	0.7	1.193	1.311	0.924	0.686857	0.0283611	0.775683	0.0101122	0.827611	34.83	31.67	36.76	52.54	41.86	101.4	81.4	99.2	118.1	30.8	33.9
FALSE	High	Master Protein	P52799	Ephrin-B2 OS=Homo sapiens OX=9606 GN=EFNB2 PE=1 SV=1	0.002	FALSE	4.981	5	1	3	1	1	333	36.9	8.85	7.97	1	cell communication;cell differentiation;cellular component movement;development;regulation of biological process;response to stimulus	membrane	protein binding;receptor activity	Pf00812	1948	ENSG00000125266.6	EFNB2	13	Axon guidance	Spinal Cord Injury	0	1.421	0.664	0.726	1.311	1.064	0.15753	0.411601	0.273146	0.564879	0.992073	14.01	6.9	12.02	39.61	16.96	96.7	136.1	64.3	103	4.6	13.44
FALSE	High	Master Protein	Q6QNY1	Biogenesis of lysosome-related organelles complex 1 subunit 2 OS=Homo sapiens OX=9606 GN=BLOC1S2 PE=1 SV=1	0	FALSE	41.094	58	4	15	4	1	142	16	4.86	53.96	4	cell organization and biogenesis;cellular component movement;metabolic process;regulation of biological process;response to stimulus;transport	cytoplasm;cytoskeleton;cytosol;membrane;mitochondrion;nucleus;vacuole	catalytic activity;protein binding	Pf10046	282991	ENSG00000196072.11	BLOC1S2	10			0	1.107	1.332	1.379	1.31	1.587	0.904007	0.788593	0.629894	0.552708	0.195913	55.72	68.35	53.74	54.09	44.38	52.5	122.4	74.2	150.9	95.41	93.55
FALSE	High	None	Q9UKA9	Polypyrimidine tract-binding protein 2 OS=Homo sapiens OX=9606 GN=PTBP2 PE=1 SV=1	0.001	FALSE	6.213	2	1	27	0	2	531	57.5	8.66	57.19	1	cell organization and biogenesis;metabolic process;regulation of biological process	nucleus;spliceosomal complex	RNA binding	Pf00076, Pf13893, Pf14259	58155	ENSG00000117569.18	PTBP2	1		mRNA Processing; TarBasePathway	0	0.681	1.043	2.129	1.309	1.485	0.000120314	0.990416	4.24865e-16	0.000307329	0.000480818	16.2	21.27	50.49	47.97	63.25	33.4	98.7	132	135.9	99.21	6.75
TRUE	Low	Master Protein	Q4VNC1	Probable cation-transporting ATPase 13A4 OS=Homo sapiens OX=9606 GN=ATP13A4 PE=2 SV=3	0.166	FALSE	0.978	3	1	5	1	1	1196	133.9	6.7	0	1	cellular homeostasis;transport	membrane	catalytic activity;metal ion binding;nucleotide binding;transporter activity	Pf00122, Pf00690, Pf00702, Pf10941, Pf12409, Pf13246	84239	ENSG00000127249.14	ATP13A4	3			0	100	100	2.291	1.309	100	4.49643e-16	3.59486e-16	0.0362421	0.643742	3.9087e-16			0	0			79.3	138.9	181.8
FALSE	Medium	Master Protein	Q9UJJ9	N-acetylglucosamine-1-phosphotransferase subunit gamma OS=Homo sapiens OX=9606 GN=GNPTG PE=1 SV=1	0.021	FALSE	2.577	7	1	2	1	1	305	34	6.95	4.31	1	metabolic process	extracellular;Golgi;membrane	catalytic activity;protein binding	Pf07915, Pf13015	84572	ENSG00000090581.9	GNPTG	16	Lysosome		0	0.9	1.098	1.596	1.308	1.436	0.975522	0.96416	0.224006	0.501061	0.312788	0	0	0	0	0	90.2	81.2	99	129.6
FALSE	Low	Master Protein	Q7Z2E3	Aprataxin OS=Homo sapiens OX=9606 GN=APTX PE=1 SV=2	0.069	FALSE	1.618	3	1	1	1	1	356	40.7	9.17	0	1	metabolic process;regulation of biological process;response to stimulus	chromosome;cytoplasm;nucleus	catalytic activity;DNA binding;metal ion binding;protein binding;RNA binding	Pf01230, Pf11969	54840	ENSG00000137074.18	APTX	9			0	0.01	0.522	100	1.308	0.683	4.49643e-16	0.322085	4.24865e-16	0.715934	0.650087		0		0	0	181.4		94.7	123.9
FALSE	High	Master Protein	O95905	Protein ecdysoneless homolog OS=Homo sapiens OX=9606 GN=ECD PE=1 SV=1	0	FALSE	21.284	11	4	8	4	1	644	72.7	4.87	29.1	4	cell proliferation;metabolic process;regulation of biological process	cytoplasm;cytosol;nucleus	protein binding	Pf07093	11319	ENSG00000122882.10	ECD	10			0	0.965	0.604	0.918	1.308	0.89	0.999488	0.153362	0.894397	0.593664	0.848066	45.11	31.14	22.12	38.36	34.12	134.5	103.8	70.6	91.1	37.39	81.01
FALSE	High	Master Protein	P78556	C-C motif chemokine 20 OS=Homo sapiens OX=9606 GN=CCL20 PE=1 SV=1	0	FALSE	10.777	25	2	10	2	1	96	10.8	8.94	31.44	2	cell communication;cellular component movement;defense response;regulation of biological process;response to stimulus	extracellular	protein binding	Pf00048	6364	ENSG00000115009.11	CCL20	2	TNF signaling pathway; Cytokine-cytokine receptor interaction; Chemokine signaling pathway; Rheumatoid arthritis	Chemokine signaling pathway; EBV LMP1 signaling	0	1.737	1.463	1.432	1.308	1.96	5.76784e-07	0.134304	0.093114	0.120771	5.5608e-07	35.16	79.5	69.61	66.44	78.76	71.2	144.5	77.4	107	89.43	80.31
FALSE	High	Master Protein	Q9Y2W6	Tudor and KH domain-containing protein OS=Homo sapiens OX=9606 GN=TDRKH PE=1 SV=2	0	FALSE	30.014	20	6	9	6	1	561	62	5.02	24.34	6	cell differentiation;cell organization and biogenesis;metabolic process;regulation of biological process	cytoplasm;mitochondrion	RNA binding	Pf00013, Pf00567, Pf07650, Pf13014	11022	ENSG00000182134.15	TDRKH	1			0	0.928	0.914	1.253	1.307	1.134	0.975522	0.906212	0.782696	0.183287	0.929693	52.45	52.86	55.25	45.66	32.1	100.7	96.4	80	123	81.14	106.23
FALSE	High	Master Protein	Q6UW56	All-trans retinoic acid-induced differentiation factor OS=Homo sapiens OX=9606 GN=ATRAID PE=1 SV=2	0	FALSE	14.209	17	1	12	1	1	229	24.7	7.25	35.64	1	cell differentiation;regulation of biological process	membrane;nucleus	protein binding		51374	ENSG00000138085.16	ATRAID	2			0	0.447	0.326	0.953	1.307	0.397	0.00047856	3.6877e-05	0.946598	0.666045	3.06093e-06	29.66	9.27	109.17	111.85	15.84	184.3	82.4	60	73.2	50.45	116.53
FALSE	Low	Master Protein	Q9C0A6	SET domain-containing protein 5 OS=Homo sapiens OX=9606 GN=SETD5 PE=1 SV=2	0.053	FALSE	1.837	1	1	3	1	1	1442	157.4	8.46	0	1	cell organization and biogenesis;metabolic process;regulation of biological process	nucleus	protein binding	Pf00856	55209	ENSG00000168137.15	SETD5	3		Histone Modifications	0	0.917	1.171	1.574	1.307	1.444	0.999488	0.961031	0.709228	0.714777	0.754516	12.83	24.98	1.42	6.07	15.04	89.6	82.2	99	129.3	11.32
FALSE	High	Master Protein	Q9HCU9	Breast cancer metastasis-suppressor 1 OS=Homo sapiens OX=9606 GN=BRMS1 PE=1 SV=1	0	FALSE	10.327	9	2	3	2	1	246	28.4	4.74	8.46	2	cell death;cell organization and biogenesis;metabolic process;regulation of biological process	cytoplasm;nucleus	catalytic activity;protein binding	Pf08598	25855	ENSG00000174744.13	BRMS1	11			0	1.282	1.005	1.081	1.307	1.423	0.376506	0.984164	0.998871	0.332914	0.309072	42.96	20.6	37.65	32.54	30.04	84.9	111.4	98.5	105.1	31.92	28.73
FALSE	High	Master Protein	Q9C0J8	pre-mRNA 3' end processing protein WDR33 OS=Homo sapiens OX=9606 GN=WDR33 PE=1 SV=2	0.001	FALSE	6.944	3	2	10	2	1	1336	145.8	9.17	8.8	2	metabolic process;response to stimulus;transport	nucleus	protein binding;RNA binding	Pf00400	55339	ENSG00000136709.11	WDR33	2	mRNA surveillance pathway		0	0.909	1.078	1.29	1.306	1.408	0.98003	0.97507	0.798199	0.531692	0.41188	56.45	51.94	55.56	69.64	75.48	83.8	101.4	89.5	125.4	38.61	46.17
FALSE	High	Master Protein	P35219	Carbonic anhydrase-related protein OS=Homo sapiens OX=9606 GN=CA8 PE=1 SV=3	0	FALSE	14.136	21	3	11	3	1	290	33	4.86	27.77	3	metabolic process;regulation of biological process;response to stimulus	cytoplasm	catalytic activity;metal ion binding;protein binding	Pf00194	767	ENSG00000178538.9	CA8	8	Nitrogen metabolism		0	1.161	0.97	1.056	1.306	1.222	0.310759	0.961239	0.998862	0.10684	0.619949	36.66	34.99	40.01	25.66	32.23	110.9	131.9	24.2	132.9	71.21	71.37
FALSE	High	Master Protein	Q9BVL4	Selenoprotein O OS=Homo sapiens OX=9606 GN=SELENOO PE=1 SV=3	0	FALSE	8.644	4	1	7	1	1	669	73.4	5.97	5.98	1		mitochondrion		Pf02696	83642	ENSG00000073169.13	SELO; SELENOO	22		Selenium Micronutrient Network; Selenium Metabolism and Selenoproteins	0	1.045	1.337	1.136	1.304	1.743	0.943653	0.896823	0.998862	0.730623	0.437767	66.5	0.79	17.83	0	0.79	71.2	109.3	95.2	124.2	36.77	25.15
FALSE	Medium	None	P51784	Ubiquitin carboxyl-terminal hydrolase 11 OS=Homo sapiens OX=9606 GN=USP11 PE=1 SV=3	0.013	FALSE	2.927	1	1	1	1	1	963	109.7	5.45	2.19	1	metabolic process	chromosome;cytoplasm;cytosol;nucleus	catalytic activity;protein binding	Pf00443, Pf06337, Pf13423, Pf14533, Pf14836	8237	ENSG00000102226.9	USP11	X			0	0.883	0.726	1.046	1.304	0.946	0.933093	0.47156	0.998862	0.402786	0.954869	3.66	8.76	1.49	18.79	4.11	111.8	101.2	81.2	105.8	4.37	3.66
FALSE	Medium	None	Q13107	Ubiquitin carboxyl-terminal hydrolase 4 OS=Homo sapiens OX=9606 GN=USP4 PE=1 SV=3	0.013	FALSE	2.927	1	1	1	1	1	963	108.5	5.71	2.19	1	cell organization and biogenesis;metabolic process;regulation of biological process	cytoplasm;cytosol;membrane;nucleus;vacuole	catalytic activity;metal ion binding;protein binding	Pf00443, Pf06337, Pf13423, Pf14836	7375	ENSG00000114316.12	USP4	3			0	0.883	0.726	1.046	1.304	0.946	0.933093	0.47156	0.998862	0.402786	0.954869	3.66	8.76	1.49	18.79	4.11	111.8	101.2	81.2	105.8	4.37	3.66
FALSE	High	Master Protein	Q99653	Calcineurin B homologous protein 1 OS=Homo sapiens OX=9606 GN=CHP1 PE=1 SV=3	0	FALSE	33.697	37	5	19	5	1	195	22.4	5.1	63.11	5	cell organization and biogenesis;cellular homeostasis;metabolic process;regulation of biological process;response to stimulus;transport	cytoplasm;cytoskeleton;cytosol;endoplasmic reticulum;membrane;nucleus	enzyme regulator activity;metal ion binding;protein binding;transporter activity	Pf00036, Pf12174, Pf13405, Pf13499, Pf13833	11261	ENSG00000187446.11	CHP1	15		Alzheimers Disease; T-Cell antigen Receptor (TCR) pathway during Staphylococcus aureus infection	0	0.833	0.848	1.159	1.303	0.906	0.60457	0.535033	0.931255	0.212911	0.797335	47.69	57.86	38.9	51.33	39.77	190.6	76.7	70.9	61.7	61.83	37.84
FALSE	High	Master Protein	Q8TBF2	Prostamide/prostaglandin F synthase OS=Homo sapiens OX=9606 GN=PRXL2B PE=1 SV=1	0	FALSE	27.947	38	4	14	4	1	198	21.2	6.67	57.58	4	metabolic process	cytoplasm;cytosol;endoplasmic reticulum	antioxidant activity;catalytic activity;nucleotide binding	Pf00152, Pf13911	127281		FAM213B	1	Arachidonic acid metabolism; Metabolic pathways		0	0.825	1.386	1.664	1.301	1.353	0.833297	0.491135	0.0569495	0.19748	0.31148	57.22	63.27	87.04	62.76	86.9	79.1	48.7	129.4	142.9	44.71	119.67
FALSE	High	Master Protein	Q99417	c-Myc-binding protein OS=Homo sapiens OX=9606 GN=MYCBP PE=1 SV=3	0	FALSE	37.116	53	4	10	4	1	103	12	5.91	44.02	4	metabolic process;regulation of biological process	cytoplasm;cytosol;mitochondrion;nucleus	protein binding		26292	ENSG00000214114.8	MYCBP	1		Pathways Affected in Adenoid Cystic Carcinoma	0	1.146	1.243	1.526	1.3	1.636	0.823447	0.891593	0.242225	0.561848	0.0564797	75.69	39.3	59.61	31.39	16.75	92	114.8	39.4	153.9	138.97	136.29
FALSE	High	Master Protein	O15235	28S ribosomal protein S12, mitochondrial OS=Homo sapiens OX=9606 GN=MRPS12 PE=1 SV=1	0	FALSE	17.186	33	3	13	3	1	138	15.2	10.29	47.04	3	cell organization and biogenesis;metabolic process	membrane;mitochondrion;ribosome	protein binding;RNA binding;structural molecule activity	Pf00164	6183	ENSG00000283018.1; ENSG00000128626.11	MRPS12	19; CHR_HG26_PATCH	Ribosome		0	0.956	0.913	0.952	1.3	1.027	0.989542	0.891593	0.790683	0.0836865	0.997101	36.17	37.26	62.78	49.55	41.2	70.9	112.6	70	146.5	49.06	44.49
FALSE	High	Master Protein	Q9H6U6	Breast carcinoma-amplified sequence 3 OS=Homo sapiens OX=9606 GN=BCAS3 PE=1 SV=3	0.005	FALSE	3.737	3	1	1	1	1	928	101.2	6.7	0	1	cell organization and biogenesis;metabolic process;regulation of biological process;response to stimulus;transport	cytoplasm;cytoskeleton;nucleus	enzyme regulator activity;protein binding	Pf12490	54828	ENSG00000141376.22	BCAS3	17		Ectoderm Differentiation	0	1.052	0.77	0.918	1.299	0.925	0.957893	0.868028	0.921974	0.725525	0.96605	57.45	22	42.53	39.24	21.89	101.5	125.6	75.1	97.9	23.1	39.73
FALSE	High	None	P31997	Carcinoembryonic antigen-related cell adhesion molecule 8 OS=Homo sapiens OX=9606 GN=CEACAM8 PE=1 SV=2	0.009	FALSE	3.302	3	1	1	0	2	349	38.1	7.39	2.35	1	cellular component movement;response to stimulus;transport	membrane	protein binding	Pf00047, Pf07679, Pf13895, Pf13927	1088	ENSG00000124469.11	CEACAM8	19			0	0.746	0.561	0.975	1.298	0.728	0.103836	0.000236344	0.921974	0.194597	0.0341754	0	0	0	0	0	131.8	98.3	73.9	95.9
FALSE	Low	Master Protein	Q9HAK2	Transcription factor COE2 OS=Homo sapiens OX=9606 GN=EBF2 PE=2 SV=4	0.102	FALSE	1.335	2	1	5	1	1	575	62.6	9.06	0	1	cell differentiation;development;metabolic process;regulation of biological process	nucleus	DNA binding;metal ion binding;protein binding	Pf01833	64641	ENSG00000221818.8	EBF2	8			0	1.324	1.406	1.378	1.297	1.824	0.131977	0.392374	0.388574	0.206201	0.000180249	46.39	46.39	19.09	21.9	44.56	72	95.3	101.3	131.4	41.89	25.12
FALSE	High	None	P05771	Protein kinase C beta type OS=Homo sapiens OX=9606 GN=PRKCB PE=1 SV=4	0.002	FALSE	4.472	2	1	1	1	1	671	76.8	7.01	2.57	1	cell death;cell organization and biogenesis;cellular homeostasis;metabolic process;regulation of biological process;response to stimulus;transport	cytoplasm;cytosol;membrane;nucleus	catalytic activity;metal ion binding;nucleotide binding;protein binding	Pf00069, Pf00130, Pf00168, Pf00433, Pf07714	5579	ENSG00000166501.12	PRKCB	16	Dopaminergic synapse; Serotonergic synapse; Amoebiasis; Tight junction; Vascular smooth muscle contraction; Glutamatergic synapse; Hepatitis B; HIF-1 signaling pathway; MicroRNAs in cancer; Amphetamine addiction; B cell receptor signaling pathway; VEGF signaling pathway; Leishmaniasis; Rap1 signaling pathway; Non-small cell lung cancer; MAPK signaling pathway; Oxytocin signaling pathway; Circadia…	Wnt Signaling Pathway and Pluripotency; Wnt Signaling Pathway Netpath; Myometrial Relaxation and Contraction Pathways; VEGFA-VEGFR2 Signaling Pathway; B Cell Receptor Signaling Pathway; Corticotropin-releasing hormone signaling pathway; Serotonin and anxiety-related events; miRs in Muscle Cell Differentiation; Common Pathways Underlying Drug Addiction; Physiological and Pathological Hypertrophy o…	0	0.8	1.099	1.783	1.297	1.425	0.892407	0.986611	0.359506	0.734537	0.758051	46.55	47.6	110.05	42.05	62.98	92.5	74	101.6	131.9	55.29	84.29
FALSE	High	Master Protein	Q13303	Voltage-gated potassium channel subunit beta-2 OS=Homo sapiens OX=9606 GN=KCNAB2 PE=1 SV=2	0.002	FALSE	4.895	5	1	1	1	1	367	41	9	2.76	1	cell differentiation;metabolic process;regulation of biological process;transport	cytoplasm;cytoskeleton;cytosol;membrane	catalytic activity;transporter activity	Pf00248	8514	ENSG00000069424.14	KCNAB2	1		Metapathway biotransformation	0	0.87	0.724	1.08	1.297	0.939	0.923575	0.655914	0.998862	0.579693	0.961714	24.62	15.3	26.43	26.5	28.25	113.2	98.5	82	106.3	1.09	30.55
FALSE	High	Master Protein	Q8N5L8	Ribonuclease P protein subunit p25-like protein OS=Homo sapiens OX=9606 GN=RPP25L PE=1 SV=1	0	FALSE	12.736	20	2	13	2	1	163	17.6	10.3	32.76	2		nucleus	protein binding;RNA binding	Pf01918	138716	ENSG00000164967.9	RPP25L	9	Ribosome biogenesis in eukaryotes; RNA transport		0	1.043	0.708	0.926	1.297	0.959	0.870109	0.0437664	0.70755	0.0608405	0.948374	41.04	28.17	20.74	46.42	15.45	100.1	117.8	83.4	98.7	12.94	56.91
FALSE	High	Master Protein	Q9BYN0	Sulfiredoxin-1 OS=Homo sapiens OX=9606 GN=SRXN1 PE=1 SV=2	0	FALSE	10.225	25	2	5	2	1	137	14.3	8.19	11.97	2	metabolic process;response to stimulus	cytoplasm;cytosol	antioxidant activity;catalytic activity;nucleotide binding;protein binding	Pf02195	140809	ENSG00000271303.1	SRXN1	20		Photodynamic therapy-induced NFE2L2 (NRF2) survival signaling	0	0.955	0.818	0.988	1.297	0.963	0.993175	0.722814	0.96747	0.579693	0.961714	33.61	12.59	54.73	9.2	29.14	131	130.4	99.3	39.2	6.78	25.34
FALSE	Medium	Master Protein	A0A0U1RRK4	LBH domain-containing protein 2 OS=Homo sapiens OX=9606 GN=LBHD2 PE=4 SV=1	0.032	FALSE	2.236	19	1	4	1	1	108	10.7	4.81	0	1				Pf15317	107984640	ENSG00000283071.1	LOC107984640; LBHD2	14			0	0.791	0.677	1.109	1.295	0.877	0.87912	0.743187	0.999979	0.727034	0.948374	0	26	0	48.84	0	119.6	94.6	81	104.8
FALSE	High	Master Protein	O00762	Ubiquitin-conjugating enzyme E2 C OS=Homo sapiens OX=9606 GN=UBE2C PE=1 SV=1	0	FALSE	15.004	28	2	2	2	1	179	19.6	7.37	8.04	2	cell division;cell organization and biogenesis;metabolic process;regulation of biological process;transport	cytoplasm;cytosol;membrane	catalytic activity;nucleotide binding;protein binding	Pf00179, Pf05743	11065	ENSG00000175063.16	UBE2C	20	Ubiquitin mediated proteolysis	Gastric Cancer Network 1; Gastric cancer network 2	0	1.298	0.965	0.915	1.295	1.19	0.347386	0.962994	0.87173	0.398661	0.894214	95.12	80.72	86.68	61.97	15.34	91.3	117.7	78.2	112.8	1.63	0.69
FALSE	High	Master Protein	Q9Y605	MORF4 family-associated protein 1 OS=Homo sapiens OX=9606 GN=MRFAP1 PE=1 SV=1	0	FALSE	12.661	19	1	6	1	1	127	14.6	4.7	15.54	1		cytoplasm;cytosol;nucleus	protein binding	Pf15155	93621	ENSG00000179010.14	MRFAP1	4			0	0.661	0.772	1.308	1.294	1.179	0.453388	0.77319	0.867203	0.677553	0.9329	16.76	36.64	36.72	59.17	51.71	129.3	85.5	80.8	104.5	39.52	19.59
FALSE	High	Master Protein	Q96C01	Protein FAM136A OS=Homo sapiens OX=9606 GN=FAM136A PE=1 SV=1	0	FALSE	23.95	41	5	15	5	1	138	15.6	7.61	46.46	5		cytoplasm		Pf05811	84908	ENSG00000035141.7	FAM136A	2			0	1.063	0.935	1.1	1.294	1.197	0.920944	0.943905	0.998862	0.492879	0.887365	95.16	76.08	76.58	68.17	69.99	85.1	126.4	89.4	99.1	87.71	94
FALSE	High	Master Protein	P33240	Cleavage stimulation factor subunit 2 OS=Homo sapiens OX=9606 GN=CSTF2 PE=1 SV=1	0	FALSE	56.021	24	8	25	2	1	577	60.9	6.83	92.83	8	metabolic process	nucleus	protein binding;RNA binding	Pf00076, Pf13893, Pf14259, Pf14304, Pf14327	1478	ENSG00000101811.13	CSTF2	X	mRNA surveillance pathway	mRNA Processing	6	1.093	1.182	1.46	1.293	1.415	0.852706	0.896823	0.296699	0.290184	0.263887	76.79	66.33	82.3	79.69	42.3	87.1	127.3	94.5	91.1	82.51	90.01
FALSE	High	Master Protein	P78545	ETS-related transcription factor Elf-3 OS=Homo sapiens OX=9606 GN=ELF3 PE=1 SV=1	0.004	FALSE	3.917	2	1	2	1	1	371	41.4	5.77	6.33	1	cell differentiation;cell organization and biogenesis;defense response;development;metabolic process;regulation of biological process;response to stimulus	cytoplasm;cytosol;Golgi;nucleus	DNA binding;protein binding	Pf00178, Pf02198	1999	ENSG00000163435.15	ELF3	1			0	0.933	1.848	2.556	1.291	2.386	0.993839	0.289432	0.0102885	0.655794	0.00750026	0	0	0	0	0	64.9	60.5	119.8	154.8
FALSE	High	Master Protein Candidate	Q9NZC4	ETS homologous factor OS=Homo sapiens OX=9606 GN=EHF PE=2 SV=1	0.004	FALSE	3.917	3	1	2	1	1	300	34.9	7.3	6.33	1	cell differentiation;cell proliferation;development;metabolic process;regulation of biological process	Golgi;nucleus	DNA binding	Pf00178, Pf02198	26298	ENSG00000135373.12	EHF	11			0	0.933	1.848	2.556	1.291	2.386	0.993839	0.289432	0.0102885	0.655794	0.00750026	0	0	0	0	0	64.9	60.5	119.8	154.8
FALSE	High	Master Protein	Q8IWA0	WD repeat-containing protein 75 OS=Homo sapiens OX=9606 GN=WDR75 PE=1 SV=1	0	FALSE	8.079	2	1	3	1	1	830	94.4	5.96	7.22	1	metabolic process;regulation of biological process	nucleus	protein binding;RNA binding	Pf00400	84128	ENSG00000115368.9	WDR75	2	Ribosome biogenesis in eukaryotes		0	0.808	0.832	1.329	1.291	1.074	0.857984	0.880669	0.7659	0.593664	0.986596	17.54	18.53	24.2	24.13	15.49	107.7	87	89.6	115.7		25.21
FALSE	High	Master Protein	Q9H999	Pantothenate kinase 3 OS=Homo sapiens OX=9606 GN=PANK3 PE=1 SV=1	0	FALSE	10.185	8	2	4	2	1	370	41.1	6.55	6.21	2	metabolic process	cytoplasm	catalytic activity;nucleotide binding	Pf03630	79646	ENSG00000120137.6	PANK3	5	Pantothenate and CoA biosynthesis; Metabolic pathways		0	0.623	0.441	0.889	1.29	0.554	0.404408	0.0795361	0.878473	0.728994	0.0795259	0	0	13.74	4.15	0	78.6	152.1	45.8	123.6		22.34
FALSE	Low	Master Protein	A5D8W1	Cilia- and flagella-associated protein 69 OS=Homo sapiens OX=9606 GN=CFAP69 PE=1 SV=3	0.136	FALSE	1.121	2	1	4	1	1	941	105.8	7.17	0	1					79846	ENSG00000105792.19	C7orf63; CFAP69	7			0	0.774	0.63	1.049	1.289	0.812	0.615871	0.137248	0.998862	0.579693	0.605966	38.56	23.47	53.16	54.85	40.64	124.4	96.2	78.3	101	84.29	69.21
FALSE	High	Master Protein	A0PK00	Transmembrane protein 120B OS=Homo sapiens OX=9606 GN=TMEM120B PE=1 SV=1	0.001	FALSE	6.931	5	1	1	1	1	339	40.2	8.9	2.93	1	cell differentiation;cell organization and biogenesis	membrane;nucleus	protein binding	Pf07851, Pf09789	144404	ENSG00000188735.12	TMEM120B	12			0	1.038	2.009	2.495	1.289	2.589	0.970312	0.0505316	0.00237885	0.599092	0.000912094	47.16	0	47.16	0	0	60.3	62.5	121.1	156.1		42.87
FALSE	High	Master Protein	O75817	Ribonuclease P protein subunit p20 OS=Homo sapiens OX=9606 GN=POP7 PE=1 SV=2	0	FALSE	8.957	11	1	10	1	1	140	15.6	8.94	37.96	1	metabolic process	cytoplasm;nucleus	catalytic activity;protein binding;RNA binding	Pf01918, Pf12328	10248	ENSG00000172336.4	POP7	7	Ribosome biogenesis in eukaryotes; RNA transport		0	0.958	0.687	1.068	1.289	0.885	0.999984	0.0414802	0.999979	0.21708	0.690239	23.91	23.86	33.98	44.08	31.51	119	93.9	81.7	105.3	15.64	21.84
FALSE	High	Master Protein	Q8N4A0	Polypeptide N-acetylgalactosaminyltransferase 4 OS=Homo sapiens OX=9606 GN=GALNT4 PE=1 SV=2	0.001	FALSE	6.649	5	2	2	2	1	578	66.6	7.61	2.05	2	metabolic process	Golgi;membrane	catalytic activity;metal ion binding	Pf00535, Pf00652, Pf02709	8693; 100528030	ENSG00000257594.3	GALNT4; POC1B-GALNT4	12	Mucin type O-glycan biosynthesis; Metabolic pathways		0	0.995	0.938	1.578	1.288	1.324	0.986164	0.976381	0.597667	0.730623	0.828675	27.15	41.48	58.7	49.6	58.7	126.9	52.4	96.5	124.3	86.24	5.04
FALSE	Medium	Master Protein	Q5T160	Probable arginine--tRNA ligase, mitochondrial OS=Homo sapiens OX=9606 GN=RARS2 PE=1 SV=1	0.019	FALSE	2.667	2	1	3	1	1	578	65.5	8.21	0	1	cell organization and biogenesis;metabolic process	cytoplasm;mitochondrion;organelle lumen	catalytic activity;nucleotide binding;RNA binding	Pf00750, Pf05746	57038	ENSG00000146282.17	RARS2	6	Aminoacyl-tRNA biosynthesis		0	1.007	1.093	1.247	1.287	1.274	0.95779	0.953754	0.769515	0.223807	0.48752	59.15	31.47	18.02	23.28	56.04	85	99	92.9	123.1	54.52	22.15
FALSE	High	Master Protein	Q9BV68	E3 ubiquitin-protein ligase RNF126 OS=Homo sapiens OX=9606 GN=RNF126 PE=1 SV=2	0	FALSE	21.097	12	2	14	2	1	311	33.8	5.47	45.46	2											0	0.895	0.991	1.611	1.286	1.275	0.933093	0.9828	0.14974	0.237311	0.600047	54.35	74.28	58.18	55.02	65.01	117.6	64.9	107.9	109.6	53.16	74.86
FALSE	High	Master Protein	P54868	Hydroxymethylglutaryl-CoA synthase, mitochondrial OS=Homo sapiens OX=9606 GN=HMGCS2 PE=1 SV=1	0	FALSE	133.604	44	15	107	14	1	508	56.6	8.16	342.98	15	metabolic process;regulation of biological process	membrane;mitochondrion;organelle lumen	catalytic activity	Pf01154, Pf08540, Pf08545	3158	ENSG00000134240.11	HMGCS2	1	Butanoate metabolism; PPAR signaling pathway; Synthesis and degradation of ketone bodies; Terpenoid backbone biosynthesis; Metabolic pathways; Valine, leucine and isoleucine degradation	PPAR signaling pathway; Synthesis and Degradation of Ketone Bodies; Amino Acid metabolism	0	1.384	1.291	1.269	1.284	1.79	9.21799e-10	0.27885	0.276265	0.00031607	2.61925e-10	52.95	52.46	54.88	53.63	53.58	79.6	118.1	78.7	123.6	35.63	36.41
FALSE	High	None	Q6P0Q8	Microtubule-associated serine/threonine-protein kinase 2 OS=Homo sapiens OX=9606 GN=MAST2 PE=1 SV=2	0.01	FALSE	3.171	0	1	3	0	4	1798	196.3	8.16	4.26	1	cell differentiation;cell organization and biogenesis;metabolic process;regulation of biological process;response to stimulus	cytoplasm;cytoskeleton;membrane	catalytic activity;metal ion binding;nucleotide binding;protein binding	Pf00069, Pf00595, Pf07714, Pf08926, Pf13180, Pf14531	23139	ENSG00000086015.20	MAST2	1			0	0.818	0.93	1.483	1.284	1.308	0.875288	0.957641	0.32153	0.437026	0.605966	39.48	52.89	41.61	38.72	53.36	100.4	82.1	84.4	133.1	42.93	28.03
FALSE	High	None	Q96GX5	Serine/threonine-protein kinase greatwall OS=Homo sapiens OX=9606 GN=MASTL PE=1 SV=1	0.01	FALSE	3.171	1	1	3	0	4	879	97.3	5.99	4.26	1	cell division;cell organization and biogenesis;metabolic process;regulation of biological process;response to stimulus	cytoplasm;cytoskeleton;nucleus	catalytic activity;nucleotide binding;protein binding	Pf00069, Pf01636, Pf07714	84930	ENSG00000120539.14	MASTL	10			0	0.818	0.93	1.483	1.284	1.308	0.875288	0.957641	0.32153	0.437026	0.605966	39.48	52.89	41.61	38.72	53.36	100.4	82.1	84.4	133.1	42.93	28.03
FALSE	High	None	O60307	Microtubule-associated serine/threonine-protein kinase 3 OS=Homo sapiens OX=9606 GN=MAST3 PE=1 SV=2	0.01	FALSE	3.171	1	1	3	0	4	1309	143	8.06	4.26	1	cell organization and biogenesis;metabolic process;regulation of biological process;response to stimulus		catalytic activity;metal ion binding;nucleotide binding;protein binding	Pf00069, Pf00595, Pf07714, Pf08926, Pf13180, Pf14531	23031	ENSG00000099308.10	MAST3	19			0	0.818	0.93	1.483	1.284	1.308	0.875288	0.957641	0.32153	0.437026	0.605966	39.48	52.89	41.61	38.72	53.36	100.4	82.1	84.4	133.1	42.93	28.03
FALSE	High	None	Q9UKI8	Serine/threonine-protein kinase tousled-like 1 OS=Homo sapiens OX=9606 GN=TLK1 PE=1 SV=2	0.01	FALSE	3.171	1	1	3	0	4	766	86.6	8.72	4.26	1	cell organization and biogenesis;metabolic process;regulation of biological process;response to stimulus;transport	nucleus	catalytic activity;nucleotide binding;protein binding	Pf00069, Pf07714	9874	ENSG00000198586.13	TLK1	2		miRNA Regulation of DNA Damage Response; Pathways Affected in Adenoid Cystic Carcinoma; DNA Damage Response	0	0.818	0.93	1.483	1.284	1.308	0.875288	0.957641	0.32153	0.437026	0.605966	39.48	52.89	41.61	38.72	53.36	100.4	82.1	84.4	133.1	42.93	28.03
FALSE	High	None	O15021	Microtubule-associated serine/threonine-protein kinase 4 OS=Homo sapiens OX=9606 GN=MAST4 PE=1 SV=4	0.01	FALSE	3.171	0	1	3	0	4	2623	283.9	8.62	4.26	1											0	0.818	0.93	1.483	1.284	1.308	0.875288	0.957641	0.32153	0.437026	0.605966	39.48	52.89	41.61	38.72	53.36	100.4	82.1	84.4	133.1	42.93	28.03
FALSE	High	Master Protein	Q9Y6X8	Zinc fingers and homeoboxes protein 2 OS=Homo sapiens OX=9606 GN=ZHX2 PE=1 SV=1	0.001	FALSE	5.277	1	1	2	1	1	837	92.3	6.86	4.28	1	metabolic process;regulation of biological process	nucleus	DNA binding;metal ion binding;protein binding	Pf00046, Pf05920	22882	ENSG00000178764.7	ZHX2	8			0	1.01	1.187	1.508	1.283	1.523	0.978979	0.926462	0.550042	0.613612	0.435209	20.94	0.2	30.27	34.86	34.81	84.7	85.6	100.6	129.1	0.19	19.81
FALSE	High	Master Protein	Q9NP73	Putative bifunctional UDP-N-acetylglucosamine transferase and deubiquitinase ALG13 OS=Homo sapiens OX=9606 GN=ALG13 PE=1 SV=2	0	FALSE	25.499	5	4	16	4	1	1137	126	6.74	42.43	4	metabolic process	endoplasmic reticulum;membrane	catalytic activity;protein binding;RNA binding	Pf02338, Pf04101	79868	ENSG00000101901.11	ALG13	X	N-Glycan biosynthesis; Metabolic pathways		0	0.974	0.783	0.9	1.283	0.961	0.989217	0.444725	0.743662	0.227106	0.950085	29.6	27.41	21.43	43.26	19.13	110.7	79.3	107.3	102.7	30.09	25.93
FALSE	High	Master Protein	P16383	GC-rich sequence DNA-binding factor 2 OS=Homo sapiens OX=9606 GN=GCFC2 PE=1 SV=2	0.001	FALSE	5.424	2	1	2	1	1	781	89.3	5.99	2.14	1	cell organization and biogenesis;metabolic process;regulation of biological process	cytosol;nucleus;spliceosomal complex	DNA binding;protein binding	Pf07842	6936	ENSG00000005436.13	GCFC2	2			0	1.114	0.934	1.076	1.283	1.198	0.90248	0.96416	0.999979	0.754082	0.95953	47.85	35.9	40.42	33.43	40.31	92.2	111.3	86.1	110.4	48.36	16.27
FALSE	High	Master Protein	Q15836	Vesicle-associated membrane protein 3 OS=Homo sapiens OX=9606 GN=VAMP3 PE=1 SV=3	0	FALSE	44.572	41	4	39	4	1	100	11.3	8.79	168.17	4	cell organization and biogenesis;regulation of biological process;transport	cell surface;cytosol;endosome;membrane	protein binding	Pf00957	9341	ENSG00000049245.12	VAMP3	1	Phagosome; SNARE interactions in vesicular transport		0	0.938	0.88	1.164	1.282	0.985	0.975522	0.649938	0.801318	0.00253154	0.961714	21.35	15.19	32.8	26.8	18.42	102.5	101.8	86.7	108.9	22.31	20.83
FALSE	High	Master Protein	Q96RU2	Ubiquitin carboxyl-terminal hydrolase 28 OS=Homo sapiens OX=9606 GN=USP28 PE=1 SV=1	0.001	FALSE	7.478	3	2	3	2	1	1077	122.4	5.2	6.51	2	cell proliferation;metabolic process;regulation of biological process;response to stimulus	nucleus	catalytic activity;protein binding	Pf00443, Pf13423	57646	ENSG00000048028.11	USP28	11			0	0.993	1.005	1.292	1.282	1.282	0.991136	0.998022	0.870302	0.646386	0.834459	19.94	21.1	13.97	3.67	21.2	96.2	95.5	91.3	117	21.08	13.97
FALSE	High	Master Protein	Q96GD4	Aurora kinase B OS=Homo sapiens OX=9606 GN=AURKB PE=1 SV=3	0	FALSE	8.213	4	1	2	1	1	344	39.3	9.29	7.16	1	cell division;cell organization and biogenesis;cell proliferation;metabolic process;regulation of biological process;response to stimulus	chromosome;cytoplasm;cytoskeleton;cytosol;nucleus	catalytic activity;metal ion binding;nucleotide binding;protein binding	Pf00069, Pf07714	9212	ENSG00000178999.12	AURKB	17		Regulation of Microtubule Cytoskeleton; ATM Signaling Network in Development and Disease	0	0.632	0.987	2.001	1.282	1.265	0.414679	0.989567	0.0420412	0.593664	0.795057	0	0	0	0	0	103	65.1	101.6	130.3
FALSE	High	Master Protein	O00468	Agrin OS=Homo sapiens OX=9606 GN=AGRN PE=1 SV=6	0	FALSE	55.023	9	12	30	12	1	2068	217.2	6.39	60.15	12											0	1.25	1.108	1.137	1.281	1.328	0.133609	0.932136	0.920526	0.0777768	0.215074	24.36	36.36	27.68	33.89	36.81	83.8	120.7	78.1	117.4	26.93	51.56
FALSE	High	Master Protein	Q96HP4	Oxidoreductase NAD-binding domain-containing protein 1 OS=Homo sapiens OX=9606 GN=OXNAD1 PE=1 SV=1	0	FALSE	11.87	13	3	6	3	1	312	34.8	8.37	11.16	3	metabolic process	mitochondrion	catalytic activity	Pf00175, Pf08030	92106	ENSG00000154814.13	OXNAD1	3			0	0.818	0.837	1.102	1.281	0.926	0.805232	0.866306	0.995898	0.425846	0.897943	14.24	24.96	24.84	19.67	15.89	89.2	91.2	91.2	128.3	18.12	19.54
FALSE	High	Master Protein	Q6ZRP7	Sulfhydryl oxidase 2 OS=Homo sapiens OX=9606 GN=QSOX2 PE=1 SV=3	0	FALSE	47.861	16	8	27	8	1	698	77.5	7.72	84.24	8	cellular homeostasis;metabolic process;regulation of biological process	extracellular;Golgi;membrane;nucleus	catalytic activity	Pf00085, Pf04777	169714	ENSG00000165661.16	QSOX2	9			0	1.067	0.829	1.084	1.28	1.185	0.799534	0.547823	0.998862	0.0919065	0.785859	36.62	30.48	33.5	28.72	31.65	97.1	111.1	75.3	116.5	41.36	25.9
FALSE	High	Master Protein	Q9BXS4	Transmembrane protein 59 OS=Homo sapiens OX=9606 GN=TMEM59 PE=1 SV=1	0.002	FALSE	4.783	4	1	2	1	1	323	36.2	5.1	7.19	1	metabolic process;regulation of biological process	endosome;Golgi;membrane;vacuole	catalytic activity;protein binding	Pf12280	9528	ENSG00000116209.11	TMEM59	1			0	0.788	0.768	1.248	1.28	0.983	0.8668	0.791803	0.917634	0.702729	0.992073	0	0	0	0	0	113	89.1	86.8	111.1
FALSE	Low	Master Protein	Q9H410	Kinetochore-associated protein DSN1 homolog OS=Homo sapiens OX=9606 GN=DSN1 PE=1 SV=2	0.054	FALSE	1.824	2	1	1	1	1	356	40	7.05	1.92	1	cell division;cell organization and biogenesis;transport	chromosome;cytosol;extracellular;nucleus;organelle lumen	protein binding	Pf08202	79980	ENSG00000149636.15	DSN1	20			0	0.605	1.116	2.196	1.278	1.427	0.364425	0.96416	0.0881798	0.766627	0.675083	11.89	20.98	43.03	35.17	40.8	96.5	55.7	108.8	139	25.45	34.93
FALSE	High	Master Protein	Q8TBQ9	Protein kish-A OS=Homo sapiens OX=9606 GN=TMEM167A PE=1 SV=1	0	FALSE	8.505	25	2	10	2	1	72	8.1	8.95	24.84	2	transport	Golgi;membrane		Pf06842	153339	ENSG00000174695.9	TMEM167A	5			0	0.959	0.567	0.772	1.278	0.762	0.999984	0.000124108	0.0327654	0.178074	0.1289	17.94	13.67	8.67	16.82	9.82	146.5	112.4	33.7	107.3	29.76	58.92
FALSE	Medium	Master Protein	Q12841	Follistatin-related protein 1 OS=Homo sapiens OX=9606 GN=FSTL1 PE=1 SV=1	0.011	FALSE	3.076	3	1	2	1	1	308	35	5.52	2.15	1	metabolic process;regulation of biological process;response to stimulus;transport	extracellular;membrane;organelle lumen	metal ion binding;protein binding;transporter activity	Pf00050, Pf03137, Pf07648, Pf13499	11167	ENSG00000163430.11	FSTL1	3			0	1.827	1.498	1.059	1.278	1.915	0.0582741	0.772604	0.998862	0.75052	0.128083	7	0	28.47	5.49	5.49	64.1	117.1	96	122.7		13.71
FALSE	High	Master Protein	Q9Y587	AP-4 complex subunit sigma-1 OS=Homo sapiens OX=9606 GN=AP4S1 PE=1 SV=1	0.002	FALSE	4.982	7	1	1	1	1	144	17	5.19	2.85	1	transport	Golgi;membrane;organelle lumen	transporter activity	Pf01217	11154	ENSG00000100478.14	AP4S1	14	Lysosome		0	1.22	0.999	1.046	1.277	1.276	0.823401	0.998828	0.998862	0.715934	0.876434	30.38	19.04	34.54	0	19.07	89	108.6	88.9	113.5	18.04	32.08
FALSE	High	Master Protein	Q8NFI3	Cytosolic endo-beta-N-acetylglucosaminidase OS=Homo sapiens OX=9606 GN=ENGASE PE=1 SV=1	0	FALSE	19.004	7	3	5	3	1	743	83.9	6.79	15.22	3	metabolic process	cytoplasm;cytosol;vacuole	catalytic activity	Pf03644	64772	ENSG00000167280.16	ENGASE	17	Other glycan degradation		0	0.867	0.735	1.441	1.276	1.249	0.957893	0.703274	0.453273	0.461329	0.755292	0	18.09	0	35.33	62.05	62.8	57.7	72.1	207.5	8.15
FALSE	High	Master Protein	O75167	Phosphatase and actin regulator 2 OS=Homo sapiens OX=9606 GN=PHACTR2 PE=1 SV=2	0	FALSE	9.281	4	2	3	2	1	634	69.7	8.16	9.56	2	regulation of biological process;transport	membrane	enzyme regulator activity;protein binding	Pf02755	9749	ENSG00000112419.14	PHACTR2	6			0	1.391	0.738	0.678	1.274	0.941	0.488371	0.77319	0.339523	0.730393	0.961714	77.91	34.54	48.04	103.15	100.85	101.9	127	75.2	95.9	72.69	52.82
FALSE	High	Master Protein	Q9NY61	Protein AATF OS=Homo sapiens OX=9606 GN=AATF PE=1 SV=1	0.001	FALSE	6.357	3	1	1	1	1	560	63.1	4.94	2.8	1	cell division;regulation of biological process;response to stimulus	cytoplasm;Golgi;nucleus	protein binding;RNA binding	Pf08164, Pf13339	26574	ENSG00000276072.2; ENSG00000275700.4	AATF	17; CHR_HSCHR17_7_CTG4			0	0.572	0.664	1.421	1.273	0.82	0.193372	0.475703	0.709228	0.714777	0.818152	1.04	26.34	3.07	62.21	4.05	132.4	75.7	84.4	107.5	6.5
FALSE	High	Master Protein	O00461	Golgi integral membrane protein 4 OS=Homo sapiens OX=9606 GN=GOLIM4 PE=1 SV=1	0	FALSE	96.825	29	13	69	13	1	696	81.8	4.77	195.24	13	transport	endosome;Golgi;membrane;organelle lumen			27333	ENSG00000173905.8	GOLIM4	3			0	1.122	0.951	0.988	1.273	1.186	0.444143	0.905165	0.886164	0.0242614	0.601291	44.94	43.5	31.98	49.1	38.72	105	92.8	82.6	119.6	45.74	51.15
FALSE	Medium	None	Q16799	Reticulon-1 OS=Homo sapiens OX=9606 GN=RTN1 PE=1 SV=1	0.01	FALSE	3.147	1	1	4	1	1	776	83.6	4.69	7.32	1	cell differentiation	endoplasmic reticulum;membrane	protein binding	Pf02453	6252	ENSG00000139970.16	RTN1	14			0	0.866	0.642	0.901	1.272	0.78	0.957893	0.618384	0.91175	0.779685	0.783312	21.49	49.37	58.85	58.18	39.38	115	101.3	73.8	109.9	23.58	24.73
FALSE	High	Master Protein	O14562	Ubiquitin domain-containing protein UBFD1 OS=Homo sapiens OX=9606 GN=UBFD1 PE=1 SV=2	0	FALSE	23.907	9	2	7	2	1	309	33.4	5.77	22.25	2			protein binding;RNA binding	Pf00240, Pf14560	56061	ENSG00000103353.15	UBFD1	16			0	0.856	0.894	1.289	1.272	1.085	0.811012	0.85145	0.559475	0.178302	0.961714	20.77	32.12	30.77	44.43	23.72	101.4	91.8	89.9	116.8	10.19	20.26
FALSE	High	Master Protein	Q7Z4H3	HD domain-containing protein 2 OS=Homo sapiens OX=9606 GN=HDDC2 PE=1 SV=1	0	FALSE	19.126	30	4	20	4	1	204	23.4	5.49	37	4		mitochondrion	protein binding	Pf01966, Pf13023	51020	ENSG00000111906.17	HDDC2	6			0	0.887	0.903	1.181	1.272	1.106	0.90882	0.887603	0.906805	0.300092	0.961714	39.59	41.45	48.37	52.17	40.17	125.5	109.2	76.7	88.6	25.63	20.35
FALSE	High	Master Protein	P56937	3-keto-steroid reductase OS=Homo sapiens OX=9606 GN=HSD17B7 PE=1 SV=1	0	FALSE	21.275	13	3	10	3	1	341	38.2	8.1	32.56	3	metabolic process	endoplasmic reticulum;membrane	catalytic activity	Pf00106, Pf03435, Pf08659, Pf13460	51478	ENSG00000132196.13	HSD17B7	1	Ovarian steroidogenesis; Steroid biosynthesis; Metabolic pathways; Steroid hormone biosynthesis	Steroid Biosynthesis	0	0.858	0.799	1.039	1.272	0.891	0.814901	0.426347	0.998862	0.192423	0.754516	30.39	37.33	55.21	44	21.92	127.5	112.3	59.9	100.2	11.44	20.67
FALSE	Medium	Master Protein	O14521	Succinate dehydrogenase [ubiquinone] cytochrome b small subunit, mitochondrial OS=Homo sapiens OX=9606 GN=SDHD PE=1 SV=1	0.036	FALSE	2.154	4	1	5	1	1	159	17	8.63	4.86	1	metabolic process;transport	membrane;mitochondrion	catalytic activity;metal ion binding	Pf05328	6392	ENSG00000204370.9	SDHD	11	Citrate cycle (TCA cycle); Carbon metabolism; Huntington's disease; Parkinson's disease; Alzheimer's disease; Oxidative phosphorylation; Non-alcoholic fatty liver disease (NAFLD); Metabolic pathways	Amino Acid metabolism; TCA Cycle; Electron Transport Chain	0	1.183	1.166	1.253	1.271	1.382	0.857984	0.936868	0.878917	0.659678	0.69043	31.98	32.21	34.35	28.38	33.21	82.8	97.9	96.5	122.7	24.82	9.12
FALSE	High	Master Protein	Q3T906	N-acetylglucosamine-1-phosphotransferase subunits alpha/beta OS=Homo sapiens OX=9606 GN=GNPTAB PE=1 SV=1	0.007	FALSE	3.453	2	1	1	1	1	1256	143.5	7.17	2.23	1	cell organization and biogenesis;metabolic process;transport	Golgi;membrane	catalytic activity;metal ion binding;protein binding	Pf00066, Pf06464, Pf11380	79158	ENSG00000111670.14	GNPTAB	12	Lysosome		0	1.156	0.974	1.071	1.27	1.237	0.837863	0.9828	0.998862	0.751012	0.93579	43.93	78.46	14.33	100.52	39.89	91.6	105.9	89.2	113.3	40.18
FALSE	High	Master Protein	Q86U70	LIM domain-binding protein 1 OS=Homo sapiens OX=9606 GN=LDB1 PE=1 SV=2	0	FALSE	8.475	7	2	5	2	1	411	46.5	6.96	13.16	2	cell differentiation;cell organization and biogenesis;development;metabolic process;regulation of biological process;response to stimulus	nucleus	DNA binding;protein binding	Pf01803	8861	ENSG00000198728.10	LDB1	10	Transcriptional misregulation in cancer		0	0.792	0.951	1.278	1.27	1.012	0.774175	0.96769	0.795444	0.638484	0.997101	34.08	65.92	68.03	71.91	57.18	94.1	102	97	107	33.11	4.88
FALSE	High	Master Protein	P38571	Lysosomal acid lipase/cholesteryl ester hydrolase OS=Homo sapiens OX=9606 GN=LIPA PE=1 SV=2	0	FALSE	11.599	7	2	7	2	1	399	45.4	6.92	20.56	2	cell organization and biogenesis;cell proliferation;defense response;metabolic process;response to stimulus	organelle lumen;vacuole	catalytic activity	Pf00561, Pf04083, Pf12695, Pf12697	3988	ENSG00000107798.17	LIPA	10	Lysosome; Steroid biosynthesis	Phase I biotransformations, non P450	0	0.975	0.839	1.141	1.269	0.982	0.987056	0.743187	0.941618	0.300354	0.968988	28.01	28.1	34.1	34.11	39.54	72.7	114.4	90.1	122.7	53.33	45.08
FALSE	Low	Master Protein	B6SEH9	Endogenous retrovirus group V member 2 Env polyprotein OS=Homo sapiens OX=9606 GN=ERVV-2 PE=2 SV=1	0.1	FALSE	1.349	4	1	1	1	1	535	59.3	8.53	0	1		membrane		Pf00429	100271846	ENSG00000268964.1	ERVV-2	19			0	0.659	0.692	1.294	1.269	0.971	0.635081	0.77319	0.950923	0.753888	0.992073	23.01	22.95	49.35	58.92	40.87	127.5	86.4	82.1	104.1	46.42	35.13
FALSE	High	Master Protein	Q8NI36	WD repeat-containing protein 36 OS=Homo sapiens OX=9606 GN=WDR36 PE=1 SV=1	0	FALSE	12.992	6	5	6	5	1	951	105.3	7.53	10.13	5	metabolic process;regulation of biological process;response to stimulus	nucleus	protein binding;RNA binding	Pf00400, Pf04192	134430	ENSG00000134987.11	WDR36	5	Ribosome biogenesis in eukaryotes		0	0.899	0.893	1.039	1.267	0.955	0.931762	0.85145	0.998862	0.293986	0.948374	19.79	33.75	33.06	46.15	25.4	114.2	81.9	100.7	103.2	46.19	139.12
FALSE	High	None	P19013	Keratin, type II cytoskeletal 4 OS=Homo sapiens OX=9606 GN=KRT4 PE=1 SV=4	0	TRUE	16.647	4	3	41	0	2	534	57.3	6.61	99.88	3	cell death;cell differentiation;cell organization and biogenesis;regulation of biological process	cell surface;cytoskeleton;cytosol;nucleus	protein binding;structural molecule activity	Pf00038, Pf10234, Pf13166	3851		KRT4	12			0	1.002	0.795	0.95	1.267	0.934	0.83456	0.107111	0.514559	0.000141623	0.787911	46.74	35.3	55.48	58.39	50.41	119.2	101.1	70.4	109.3	32.85	17.25
TRUE	High	Master Protein	Q96I23	Protein preY, mitochondrial OS=Homo sapiens OX=9606 GN=PYURF PE=1 SV=1	0	FALSE	8.835	20	1	2	1	1	114	12.6	9.33	11.52	1	metabolic process;regulation of biological process	membrane;mitochondrion	protein binding	Pf03966	100996939	ENSG00000145337.4	PYURF	4			0	2.832	1.542	0.71	1.266	2.012	8.26686e-05	0.672468	0.4275	0.741442	0.0693036	59.65	85.48	24.61	73.68	59.65	52	147.1	96.4	104.5	80.51
FALSE	High	Master Protein	Q8TB52	F-box only protein 30 OS=Homo sapiens OX=9606 GN=FBXO30 PE=1 SV=3	0.005	FALSE	3.846	2	1	1	1	1	745	82.3	5.4	2.5	1	metabolic process	cytosol	catalytic activity;metal ion binding;protein binding	Pf00646, Pf02176, Pf12937	84085	ENSG00000118496.4	FBXO30	6			0	0.813	0.763	1.311	1.265	1.066	0.898182	0.780318	0.864117	0.705363	0.992073	4.29	9.2	1.7	15.79	2.54	107.4	87.4	90.6	114.6	13.22	2.88
FALSE	High	Master Protein	Q99574	Neuroserpin OS=Homo sapiens OX=9606 GN=SERPINI1 PE=1 SV=1	0	FALSE	15.531	10	2	12	2	1	410	46.4	4.91	25.43	2	regulation of biological process	extracellular;organelle lumen	enzyme regulator activity	Pf00079	5274	ENSG00000163536.12	SERPINI1	3			0	1.02	0.971	1.09	1.264	1.045	0.970962	0.962994	0.998862	0.442879	0.999858	52.45	56.86	41.22	59.92	44.94	88.3	151	72.6	88.1	30.45	42.63
FALSE	High	Master Protein	Q9NYG2	Palmitoyltransferase ZDHHC3 OS=Homo sapiens OX=9606 GN=ZDHHC3 PE=1 SV=2	0	FALSE	14.879	13	2	15	2	1	299	34.1	8.18	58.76	2	metabolic process;transport	Golgi;membrane	catalytic activity;metal ion binding	Pf01529	51304	ENSG00000280674.2; ENSG00000163812.13	ZDHHC3	3; CHR_HG2066_PATCH			0	1.187	0.972	1.101	1.264	1.013	0.350885	0.960646	0.980391	0.292592	0.992671	69.13	40.31	64.59	59.35	34.41	111.9	93.3	84	110.7	25.11	50.38
FALSE	High	Master Protein	O95361	Tripartite motif-containing protein 16 OS=Homo sapiens OX=9606 GN=TRIM16 PE=1 SV=3	0	FALSE	45.587	19	7	30	7	1	564	63.9	5.49	79.75	7	cell organization and biogenesis;metabolic process;regulation of biological process;response to stimulus	cytoplasm;cytosol;membrane	DNA binding;metal ion binding;protein binding	Pf00622, Pf13765	10626	ENSG00000221926.11	TRIM16	17			0	0.969	0.605	0.861	1.264	0.885	0.989542	0.000685285	0.303361	0.169939	0.6857	34.72	22.77	40.58	72.33	37.03	124.9	113.1	63	99	38.51	15.77
FALSE	High	Master Protein	Q9Y2R4	Probable ATP-dependent RNA helicase DDX52 OS=Homo sapiens OX=9606 GN=DDX52 PE=1 SV=3	0	FALSE	10.616	5	2	5	2	1	599	67.5	9.67	14.02	2	metabolic process	cytoplasm;membrane;nucleus	catalytic activity;DNA binding;nucleotide binding;RNA binding	Pf00176, Pf00270, Pf00271, Pf04851, Pf13307	11056	ENSG00000277594.2	DDX52	17; CHR_HSCHR17_7_CTG4			0	0.943	0.824	1.231	1.262	1.166	0.991136	0.822639	0.864938	0.539038	0.928597	39.95	23.42	64.72	68.3	46.76	105.3	99.3	72.7	122.7	17.5	63.31
FALSE	High	Master Protein	Q9GZP8	Immortalization up-regulated protein OS=Homo sapiens OX=9606 GN=IMUP PE=1 SV=1	0	FALSE	10.991	25	1	6	1	1	106	10.9	9.73	21.52	1		cytosol;membrane;nucleus	DNA binding		64073	ENSG00000167644.11	C19orf33	19			0	0.602	0.813	1.706	1.262	1.026	7.48843e-06	0.263094	5.46734e-05	0.0368685	0.999858	9.25	28.03	25.55	42.38	0	116.2	69.9	94.5	119.3		24.02
FALSE	High	Master Protein	Q8NHU6	Tudor domain-containing protein 7 OS=Homo sapiens OX=9606 GN=TDRD7 PE=1 SV=2	0	FALSE	11.097	4	3	5	3	1	1098	123.5	7.21	10.62	3	cell differentiation;regulation of biological process	cytoplasm;organelle lumen	protein binding;RNA binding	Pf00567, Pf12872	23424	ENSG00000196116.7	TDRD7	9			0	0.82	1.002	1.514	1.26	1.23	0.90248	0.997752	0.430678	0.581814	0.816555	41.33	53.87	50.29	82.28	52.43	61.4	44.4	106.1	188.1	60.2	48.12
FALSE	High	Master Protein	Q9NYB9	Abl interactor 2 OS=Homo sapiens OX=9606 GN=ABI2 PE=1 SV=1	0	FALSE	9.297	4	3	13	1	1	513	55.6	6.16	25.13	3	cell organization and biogenesis;cellular component movement;metabolic process;regulation of biological process;response to stimulus	cytoplasm;cytoskeleton;cytosol	DNA binding;enzyme regulator activity;protein binding	Pf00018, Pf07653, Pf07815, Pf14604	10152		ABI2	2	Regulation of actin cytoskeleton	Regulation of Actin Cytoskeleton	0	0.79	0.829	1.181	1.26	1.05	0.750374	0.867662	0.936207	0.631959	0.99553	41.29	34.73	23.87	37.16	28.46	105	97.3	87.5	110.2	25.56	60.55
FALSE	Medium	None	A4FU01	Myotubularin-related protein 11 OS=Homo sapiens OX=9606 GN=MTMR11 PE=2 SV=2	0.02	FALSE	2.608	1	1	5	1	1	709	79.5	7.03	5.08	1				Pf06602, Pf12578	10903	ENSG00000014914.20	MTMR11	1			0	1.141	0.95	1.096	1.26	1.196	0.880717	0.978273	0.999979	0.74861	0.948374	37.22	22.09	41.18	21.02	13.82	100	85.4	94.9	119.6	22.98	22.93
FALSE	High	Master Protein	P16083	Ribosyldihydronicotinamide dehydrogenase [quinone] OS=Homo sapiens OX=9606 GN=NQO2 PE=1 SV=5	0	FALSE	9.322	10	2	14	2	1	231	25.9	6.29	13.42	2	metabolic process;regulation of biological process;response to stimulus	cytoplasm;cytosol	catalytic activity;metal ion binding;nucleotide binding;protein binding	Pf02525, Pf03358	4835	ENSG00000124588.19	NQO2	6		Photodynamic therapy-induced NFE2L2 (NRF2) survival signaling	0	1.043	1.038	1.463	1.26	1.232	0.968068	0.994508	0.720443	0.755432	0.922572	30.71	24.5	46.97	40.33	20.63	89.1	102.5	77	131.5	39.81	25.77
FALSE	High	Master Protein	Q8TD06	Anterior gradient protein 3 OS=Homo sapiens OX=9606 GN=AGR3 PE=1 SV=1	0	FALSE	46.79	49	7	132	6	1	166	19.2	7.99	316.43	7	cell differentiation;regulation of biological process	endoplasmic reticulum	protein binding	Pf13899	155465	ENSG00000173467.8	AGR3	7			0	1.169	1.019	1.112	1.259	1.27	0.276056	0.989567	0.96747	0.0529947	0.462322	38.26	62.3	35.36	50.85	20.52	80.4	101.2	113	105.5	17.79	39.04
FALSE	High	Master Protein	Q9H0H0	Integrator complex subunit 2 OS=Homo sapiens OX=9606 GN=INTS2 PE=1 SV=2	0.003	FALSE	4.197	2	1	3	1	1	1204	134.2	6.05	0	1	metabolic process	cytoplasm;membrane;nucleus	protein binding	Pf14750	57508	ENSG00000108506.11	INTS2	17			0	0.902	0.905	1.262	1.258	1.138	0.989217	0.962994	0.966662	0.779031	0.968988	16.71	66.54	18.98	82.18	20.28	101.4	91.4	91.8	115.4	22.11	18.73
FALSE	High	Master Protein	P10721	Mast/stem cell growth factor receptor Kit OS=Homo sapiens OX=9606 GN=KIT PE=1 SV=1	0.001	FALSE	7.31	2	2	7	1	1	976	109.8	6.98	13.39	2	cell death;cell differentiation;cell division;cell organization and biogenesis;cell proliferation;cellular component movement;defense response;metabolic process;regulation of biological process;response to stimulus;transport	cell surface;cytoplasm;membrane;vacuole	catalytic activity;metal ion binding;nucleotide binding;protein binding;receptor activity;signal transducer activity	Pf00047, Pf00069, Pf07679, Pf07714, Pf13895, Pf13927	3815	ENSG00000157404.15	KIT	4	Endocytosis; Central carbon metabolism in cancer; Hematopoietic cell lineage; Phospholipase D signaling pathway; Cytokine-cytokine receptor interaction; Acute myeloid leukemia; Rap1 signaling pathway; Breast cancer; Pathways in cancer; Melanogenesis; Ras signaling pathway; PI3K-Akt signaling pathway	Focal Adhesion-PI3K-Akt-mTOR-signaling pathway; Differentiation Pathway; Kit receptor signaling pathway; Imatinib and Chronic Myeloid Leukemia; Cardiac Progenitor Differentiation	0	1.195	1.469	1.545	1.257	1.846	0.829887	0.730028	0.613559	0.739418	0.119865	0	0	0	0	0	72.6	86.8	106.6	134
FALSE	Low	None	Q8TEA7	TBC domain-containing protein kinase-like protein OS=Homo sapiens OX=9606 GN=TBCK PE=1 SV=4	0.052	FALSE	1.856	1	1	12	1	1	893	100.6	6.58	19.09	1	cell organization and biogenesis;cell proliferation;metabolic process;regulation of biological process;transport	cytoplasm;cytoskeleton	catalytic activity;enzyme regulator activity;nucleotide binding;protein binding	Pf00069, Pf00566, Pf00581, Pf07714, Pf14531	93627	ENSG00000145348.16	TBCK	4			0	0.843	0.712	1.041	1.256	0.894	0.826033	0.271228	0.998862	0.481359	0.76273	7.36	5.85	21.19	51.44	9.23	111.8	100.8	82.4	104.9	4.47	7.75
FALSE	High	None	Q9BZ23	Pantothenate kinase 2, mitochondrial OS=Homo sapiens OX=9606 GN=PANK2 PE=1 SV=3	0.002	FALSE	4.546	2	1	3	1	1	570	62.6	9.28	3.82	1	cell organization and biogenesis;metabolic process;regulation of biological process	cytoplasm;cytosol;mitochondrion	catalytic activity;nucleotide binding	Pf03630	80025	ENSG00000125779.21	PANK2	20	Pantothenate and CoA biosynthesis; Metabolic pathways		0	0.623	0.441	0.889	1.255	0.554	0.402185	0.0810783	0.891237	0.786586	0.167677	0	0	0	0	0	152.8	95.2	67.4	84.6
FALSE	High	Master Protein	Q9UBB9	Tuftelin-interacting protein 11 OS=Homo sapiens OX=9606 GN=TFIP11 PE=1 SV=1	0	FALSE	19.085	8	4	8	4	1	837	96.8	5.67	12.65	4	cell organization and biogenesis;metabolic process;regulation of biological process;response to stimulus	cytoplasm;nucleus;spliceosomal complex	DNA binding;protein binding	Pf01585, Pf07842, Pf12457, Pf12656	24144	ENSG00000100109.16	TFIP11	22			0	0.616	0.723	1.371	1.255	0.826	0.0586416	0.40947	0.646129	0.554331	0.600708	29.06	53.34	69.29	81.43	56.83	127.5	87.4	58.9	126.2	47.94	40.63
FALSE	High	Master Protein	Q9UHA4	Ragulator complex protein LAMTOR3 OS=Homo sapiens OX=9606 GN=LAMTOR3 PE=1 SV=1	0	FALSE	16.031	49	3	15	3	1	124	13.6	7.34	41.91	3	metabolic process;regulation of biological process;response to stimulus;transport	endosome;membrane	enzyme regulator activity;protein binding;structural molecule activity	Pf08923	8649	ENSG00000109270.12	LAMTOR3	4	MAPK signaling pathway; mTOR signaling pathway	MAPK Signaling Pathway	0	0.829	0.741	1.347	1.254	0.983	0.599564	0.109895	0.273146	0.178932	0.968988	49.71	49	53.71	79.29	55.6	118.3	94	88.5	99.2	14.01	14.6
FALSE	Medium	Master Protein	Q7Z6B7	SLIT-ROBO Rho GTPase-activating protein 1 OS=Homo sapiens OX=9606 GN=SRGAP1 PE=1 SV=1	0.032	FALSE	2.249	2	1	2	1	1	1085	124.2	6.83	5.24	1	regulation of biological process;response to stimulus	cytoplasm;cytosol	enzyme regulator activity;protein binding	Pf00018, Pf00611, Pf00620, Pf07653, Pf14604	57522	ENSG00000196935.8	SRGAP1	12	Axon guidance		0	0.791	0.747	1.184	1.254	0.937	0.812719	0.705747	0.94137	0.657168	0.961714	0	0	0	0	0	115.1	91.1	86	107.8
FALSE	High	Master Protein	Q9BT40	Inositol polyphosphate 5-phosphatase K OS=Homo sapiens OX=9606 GN=INPP5K PE=1 SV=3	0.001	FALSE	6.799	2	1	5	1	1	448	51.1	6.54	17.49	1	cell organization and biogenesis;metabolic process;regulation of biological process;response to stimulus	cytoplasm;cytosol;endoplasmic reticulum;membrane;nucleus	catalytic activity;protein binding;receptor activity;signal transducer activity	Pf03372, Pf07888	51763	ENSG00000132376.19	INPP5K	17	Insulin signaling pathway; Phosphatidylinositol signaling system; Inositol phosphate metabolism; Metabolic pathways	Notch Signaling Pathway	0	0.963	0.878	1.143	1.254	1.101	0.999984	0.928105	0.980391	0.727034	0.987883	24.69	24.3	11.96	34.82	24.72	101.5	97.7	89.1	111.7	25.16	0.98
FALSE	High	Master Protein	Q96I59	Probable asparagine--tRNA ligase, mitochondrial OS=Homo sapiens OX=9606 GN=NARS2 PE=1 SV=3	0	FALSE	9.4	12	3	6	3	1	477	54.1	7.24	8.21	3	metabolic process	cytoplasm;cytosol;mitochondrion;organelle lumen	catalytic activity;nucleotide binding	Pf00152, Pf01336	79731	ENSG00000137513.9	NARS2	11	Aminoacyl-tRNA biosynthesis	Ectoderm Differentiation	0	1.539	1.18	1.292	1.254	1.563	0.00180734	0.871157	0.656034	0.333431	0.029915	65.14	41.32	50.85	29.9	44.33	104.5	134.6	80.7	80.2	38.01	48.13
FALSE	High	Master Protein	Q05639	Elongation factor 1-alpha 2 OS=Homo sapiens OX=9606 GN=EEF1A2 PE=1 SV=1	0	FALSE	148.953	28	13	1269	2	1	463	50.4	9.03	4705.44	13	metabolic process;regulation of biological process;response to stimulus	cytoplasm;nucleus	catalytic activity;nucleotide binding;protein binding;RNA binding	Pf00009, Pf03143, Pf03144	1917	ENSG00000101210.10	EEF1A2	20	RNA transport; Legionellosis	Translation Factors	0	1.478	0.831	0.913	1.253	1.017	0.138428	0.87405	0.867955	0.510156	0.992073	139.54	92.93	68.77	53.01	111.24	73.4	108.4	72	146.2	140.6	118.37
FALSE	High	Master Protein	Q6ZSJ8	Uncharacterized protein C1orf122 OS=Homo sapiens OX=9606 GN=C1orf122 PE=4 SV=2	0	FALSE	13.182	23	2	3	2	1	110	11.5	6.73	10.65	2					127687	ENSG00000197982.13	C1orf122	1			0	1.012	0.823	0.775	1.253	1.129	0.97502	0.868028	0.329941	0.64532	0.961714	21.48	24.32	26.71	36.31	44.06	67.9	141.8	91.5	98.9	65.55	64.58
FALSE	High	Master Protein	O15155	BET1 homolog OS=Homo sapiens OX=9606 GN=BET1 PE=1 SV=1	0	FALSE	23.128	25	2	22	2	1	118	13.3	9.06	63.41	2	cell organization and biogenesis;transport	endoplasmic reticulum;Golgi;membrane	protein binding	Pf05739	10282	ENSG00000105829.11	BET1	7	SNARE interactions in vesicular transport		0	1.191	0.922	0.764	1.253	0.926	0.145828	0.879844	0.0158356	0.0724313	0.839805	34.91	25.81	29.48	63.55	29.2	107.9	126.3	64.4	101.4	12.81	30.14
FALSE	High	None	Q8N142	Adenylosuccinate synthetase isozyme 1 OS=Homo sapiens OX=9606 GN=ADSSL1 PE=1 SV=1	0	FALSE	19.143	5	3	17	3	1	457	50.2	8.59	49.53	3	metabolic process;response to stimulus	cytoplasm;cytosol	catalytic activity;metal ion binding;nucleotide binding;protein binding	Pf00709	122622	ENSG00000185100.10	ADSSL1	14	Purine metabolism; Alanine, aspartate and glutamate metabolism; Metabolic pathways		0	0.78	0.972	1.431	1.252	1.348	0.566655	0.96416	0.373541	0.333431	0.328648	39.65	32.88	58.41	58.9	70.62	123.8	74.9	116.4	84.9	61.86	90.27
FALSE	High	Master Protein	Q5MIZ7	Serine/threonine-protein phosphatase 4 regulatory subunit 3B OS=Homo sapiens OX=9606 GN=PPP4R3B PE=1 SV=2	0	FALSE	40.584	13	7	19	4	1	849	97.4	4.96	50.22	7	metabolic process;regulation of biological process	cytoplasm;cytoskeleton;nucleus		Pf04802	57223	ENSG00000275052.4	SMEK2; PPP4R3B	2	Glucagon signaling pathway	Integrated Breast Cancer Pathway	0	1.11	0.919	0.937	1.252	1.01	0.840162	0.953754	0.908499	0.60724	0.992073	75.37	64.16	50.2	48.37	70.36	77.2	135.2	67.4	120.1	30.63	91.76
FALSE	High	Master Protein	Q9NX08	COMM domain-containing protein 8 OS=Homo sapiens OX=9606 GN=COMMD8 PE=1 SV=1	0.003	FALSE	4.249	7	1	1	1	1	183	21.1	5.43	2.09	1	metabolic process;regulation of biological process	cytoplasm;cytosol;nucleus	protein binding	Pf07258	54951	ENSG00000169019.10	COMMD8	4			0	0.591	1.025	2.171	1.252	1.315	0.347386	0.999797	0.193724	0.780397	0.871523	5.33	15.3	11.46	11.74	21.51	102.6	60.6	105.2	131.6	40.95	3.39
FALSE	High	Master Protein	Q13561	Dynactin subunit 2 OS=Homo sapiens OX=9606 GN=DCTN2 PE=1 SV=4	0	FALSE	110.615	48	11	49	11	1	401	44.2	5.21	179.57	11	cell organization and biogenesis;cell proliferation;regulation of biological process;transport	chromosome;cytoplasm;cytoskeleton;cytosol;membrane	catalytic activity;motor activity;protein binding	Pf04912	10540	ENSG00000175203.15	DCTN2	12	Huntington's disease; Vasopressin-regulated water reabsorption		0	0.986	1.696	2.024	1.251	1.845	0.97502	0.000240093	1.13365e-09	0.0302194	3.66562e-08	38.76	61.49	72.11	57.25	68.28	75.6	71.4	121.3	131.7	31.79	19.86
FALSE	High	Master Protein	Q9Y5Q9	General transcription factor 3C polypeptide 3 OS=Homo sapiens OX=9606 GN=GTF3C3 PE=1 SV=1	0	FALSE	43.594	10	6	18	6	1	886	101.2	5.07	61.27	6	metabolic process;regulation of biological process	membrane;nucleus	DNA binding;protein binding	Pf13414, Pf13424, Pf13432	9330	ENSG00000119041.10	GTF3C3	2			0	0.791	0.855	1.345	1.25	1.061	0.338429	0.654426	0.22572	0.0736133	0.987452	18.37	31.9	38.39	44.08	22.46	89.9	85.7	105.8	118.6	37.04	14.53
FALSE	High	Master Protein	O00584	Ribonuclease T2 OS=Homo sapiens OX=9606 GN=RNASET2 PE=1 SV=2	0	FALSE	16.999	17	3	12	3	1	256	29.5	7.08	46.39	3	metabolic process;transport	endoplasmic reticulum;extracellular;organelle lumen;vacuole	catalytic activity;RNA binding	Pf00445	8635	ENSG00000026297.15	RNASET2	6			0	0.958	1.639	1.355	1.25	1.882	0.999984	0.294796	0.854135	0.684715	0.0998525	80.65	36.36	118.98	44.15	40.36	93.9	83.6	138.4	84.1	121.66	139.45
FALSE	High	Master Protein	Q8N8V4	Ankyrin repeat and SAM domain-containing protein 4B OS=Homo sapiens OX=9606 GN=ANKS4B PE=1 SV=2	0	FALSE	11.784	9	3	10	3	1	417	46.6	5.1	16.59	3	cell differentiation;cell organization and biogenesis;response to stimulus	membrane	protein binding	Pf00023, Pf00536, Pf07647, Pf12796, Pf13606, Pf13637, Pf13857	257629	ENSG00000175311.6; ENSG00000284290.1	ANKS4B	16; CHR_HG926_PATCH			0	0.929	0.976	1.322	1.249	1.151	0.975522	0.962994	0.650812	0.390901	0.907767	25.36	21.89	34.21	29.16	35.66	105.4	92.4	79.4	122.7	26.43	23.75
FALSE	Medium	Master Protein	O43739	Cytohesin-3 OS=Homo sapiens OX=9606 GN=CYTH3 PE=1 SV=2	0.012	FALSE	3.027	3	1	1	1	1	400	46.3	5.47	1.82	1	regulation of biological process;transport	cytoplasm;cytosol;membrane	protein binding	Pf00169, Pf01369, Pf15413	9265	ENSG00000008256.15	CYTH3	7	Endocytosis; Phospholipase D signaling pathway	Insulin Signaling	0	1.094	1.033	1.179	1.249	1.29	0.874031	0.997752	0.928088	0.486809	0.685492	0	0	0	0	0	90.5	99.1	93.6	116.8
FALSE	Medium	Master Protein Candidate	Q15438	Cytohesin-1 OS=Homo sapiens OX=9606 GN=CYTH1 PE=1 SV=1	0.012	FALSE	3.027	3	1	1	1	1	398	46.4	5.54	1.82	1	regulation of biological process;transport	cytoplasm;cytosol;membrane	protein binding	Pf00169, Pf01369, Pf15413	9267	ENSG00000108669.16	CYTH1	17	Endocytosis; Phospholipase D signaling pathway		0	1.094	1.033	1.179	1.249	1.29	0.874031	0.997752	0.928088	0.486809	0.685492	0	0	0	0	0	90.5	99.1	93.6	116.8
FALSE	Medium	Master Protein Candidate	Q99418	Cytohesin-2 OS=Homo sapiens OX=9606 GN=CYTH2 PE=1 SV=2	0.012	FALSE	3.027	3	1	1	1	1	400	46.5	5.54	1.82	1	cell organization and biogenesis;regulation of biological process;transport	cytoplasm;cytosol;membrane	protein binding	Pf00169, Pf01369, Pf13654, Pf15413	9266		CYTH2	19	Endocytosis; Phospholipase D signaling pathway		0	1.094	1.033	1.179	1.249	1.29	0.874031	0.997752	0.928088	0.486809	0.685492	0	0	0	0	0	90.5	99.1	93.6	116.8
FALSE	High	Master Protein	Q9NVC6	Mediator of RNA polymerase II transcription subunit 17 OS=Homo sapiens OX=9606 GN=MED17 PE=1 SV=2	0	FALSE	18.668	6	3	11	3	1	651	72.8	7.44	21.89	3	metabolic process;regulation of biological process;response to stimulus	membrane;nucleus	protein binding;receptor activity	Pf10156	9440	ENSG00000042429.11	MED17	11	Thyroid hormone signaling pathway		0	1.019	0.76	0.95	1.248	0.918	0.964642	0.507298	0.906843	0.397686	0.850547	14.56	14.43	17.57	33.83	17.6	99.9	105.2	83	111.9	22.96	19.94
FALSE	High	Master Protein	Q9NRG4	N-lysine methyltransferase SMYD2 OS=Homo sapiens OX=9606 GN=SMYD2 PE=1 SV=2	0	FALSE	13.991	9	2	6	2	1	433	49.7	6.71	16.68	2	cell organization and biogenesis;metabolic process;regulation of biological process	cytoplasm;cytosol;nucleus	catalytic activity;metal ion binding;protein binding	Pf00856, Pf01753, Pf13424	56950	ENSG00000143499.13	SMYD2	1		Histone Modifications	0	0.932	0.781	0.975	1.248	0.975	0.976234	0.656055	0.946598	0.580136	0.965003	19.6	8.44	68.9	44.03	45.93	105.1	97.9	76.6	120.5	15.23	21.21
FALSE	High	Master Protein	P49674	Casein kinase I isoform epsilon OS=Homo sapiens OX=9606 GN=CSNK1E PE=1 SV=1	0.001	FALSE	7.016	3	1	4	1	1	416	47.3	9.66	9.64	1	metabolic process;regulation of biological process;response to stimulus;transport	cytoplasm;cytosol;nucleus	catalytic activity;nucleotide binding;protein binding;RNA binding	Pf00069, Pf01636, Pf07714	1454; 102800317	ENSG00000213923.11; ENSG00000283900.1	CSNK1E; LOC400927-CSNK1E	22	FoxO signaling pathway; Hippo signaling pathway; Wnt signaling pathway; Hippo signaling pathway -multiple species; Hedgehog signaling pathway; Circadian rhythm	Wnt Signaling Pathway and Pluripotency; Wnt Signaling Pathway; Wnt Signaling Pathway Netpath; Melatonin metabolism and effects	0	1.037	0.844	1.146	1.248	1.054	0.97502	0.906212	0.972282	0.768015	0.996231	63.46	78.43	42.03	105.82	46.85	87.7	105.9	74.1	132.3	55.33	51.73
FALSE	High	Master Protein Candidate	P48730	Casein kinase I isoform delta OS=Homo sapiens OX=9606 GN=CSNK1D PE=1 SV=2	0.001	FALSE	7.016	3	1	4	1	1	415	47.3	9.74	9.64	1	cell organization and biogenesis;metabolic process;regulation of biological process;response to stimulus;transport	cytoplasm;cytoskeleton;cytosol;Golgi;membrane;nucleus	catalytic activity;nucleotide binding;protein binding	Pf00069, Pf01636, Pf07714	1453	ENSG00000141551.14	CSNK1D	17	Hippo signaling pathway; Gap junction; Hedgehog signaling pathway; Circadian rhythm	Integrated Breast Cancer Pathway; Melatonin metabolism and effects; Wnt Signaling Pathway Netpath	0	1.037	0.844	1.146	1.248	1.054	0.97502	0.906212	0.972282	0.768015	0.996231	63.46	78.43	42.03	105.82	46.85	87.7	105.9	74.1	132.3	55.33	51.73
FALSE	High	Master Protein	Q5TEU4	Arginine-hydroxylase NDUFAF5, mitochondrial OS=Homo sapiens OX=9606 GN=NDUFAF5 PE=1 SV=1	0	FALSE	9.395	9	3	5	3	1	345	38.9	6.57	11.36	3	cell organization and biogenesis;metabolic process	membrane;mitochondrion	catalytic activity;protein binding	Pf01209, Pf01728, Pf08241, Pf08242, Pf12847, Pf13489, Pf13649, Pf13659, Pf13847	79133	ENSG00000101247.17	NDUFAF5	20			0	0.895	0.971	1.09	1.247	0.979	0.929766	0.966003	0.998862	0.498068	0.961714	30.54	46.23	30.61	27.06	40.51	102.5	94.6	90.1	112.9	22.01	11.5
FALSE	High	Master Protein	P25815	Protein S100-P OS=Homo sapiens OX=9606 GN=S100P PE=1 SV=2	0	FALSE	57.839	49	4	47	4	1	95	10.4	4.88	127.89	4	cellular component movement;response to stimulus;transport	cytoplasm;extracellular;membrane;nucleus;organelle lumen	metal ion binding;protein binding	Pf01023	6286	ENSG00000163993.6	S100P	4		Gastric Cancer Network 1	0	0.994	0.788	0.744	1.245	0.902	0.95779	0.299168	0.0057454	0.116762	0.74952	69.54	43.19	38.83	59.8	64.89	103.1	131.1	68.5	97.4	58.81	42.88
FALSE	High	Master Protein Candidate	O43286	Beta-1,4-galactosyltransferase 5 OS=Homo sapiens OX=9606 GN=B4GALT5 PE=1 SV=1	0.004	FALSE	3.874	2	1	4	1	1	388	45.1	8.15	9.01	1	metabolic process	Golgi;membrane	catalytic activity;metal ion binding	Pf02709, Pf10111, Pf13733	9334	ENSG00000158470.5	B4GALT5	20	Mucin type O-glycan biosynthesis		0	1.199	0.99	1.027	1.245	1.232	0.812719	0.989686	0.997247	0.710394	0.884531	23.55	24.9	22.11	23.26	23.64	90.5	108.5	89.5	111.5	26.33	24.68
FALSE	High	Master Protein	P15291	Beta-1,4-galactosyltransferase 1 OS=Homo sapiens OX=9606 GN=B4GALT1 PE=1 SV=5	0.004	FALSE	3.874	2	1	4	1	1	398	43.9	8.65	9.01	1	cell organization and biogenesis;cellular component movement;defense response;metabolic process;regulation of biological process;response to stimulus;transport	cell surface;extracellular;Golgi;membrane	catalytic activity;metal ion binding;protein binding	Pf02709, Pf10111, Pf13733	2683	ENSG00000086062.12	B4GALT1	9	N-Glycan biosynthesis; Glycosphingolipid biosynthesis - lacto and neolacto series; Galactose metabolism; Other types of O-glycan biosynthesis; Metabolic pathways; Glycosaminoglycan biosynthesis - keratan sulfate		0	1.199	0.99	1.027	1.245	1.232	0.812719	0.989686	0.997247	0.710394	0.884531	23.55	24.9	22.11	23.26	23.64	90.5	108.5	89.5	111.5	26.33	24.68
FALSE	High	Master Protein	Q9NRW3	DNA dC->dU-editing enzyme APOBEC-3C OS=Homo sapiens OX=9606 GN=APOBEC3C PE=1 SV=2	0.001	FALSE	6.236	14	2	5	2	1	190	22.8	7.59	10.86	2	defense response;metabolic process;regulation of biological process;response to stimulus	cytoplasm;nucleus	catalytic activity;metal ion binding;protein binding;RNA binding	Pf05240, Pf08210	27350	ENSG00000244509.3	APOBEC3C	22			0	1.143	1.092	1.189	1.245	1.36	0.812719	0.979267	0.917634	0.500097	0.50471	7.04	21.68	14.95	20.51	14.79	87.1	99.5	95.1	118.4	6.98	5.48
FALSE	High	Master Protein	P23470	Receptor-type tyrosine-protein phosphatase gamma OS=Homo sapiens OX=9606 GN=PTPRG PE=1 SV=4	0.002	FALSE	4.799	1	1	5	1	1	1445	161.9	6.42	9.13	1	metabolic process;regulation of biological process;response to stimulus	membrane	catalytic activity;protein binding;receptor activity;signal transducer activity	Pf00041, Pf00102, Pf00194, Pf13350, Pf14566	5793	ENSG00000144724.19	PTPRG	3			0	1.189	0.869	0.964	1.244	1.187	0.748775	0.911015	0.946598	0.684715	0.908789	47.98	38.1	44.66	52.99	41.29	96.4	114.6	74.5	114.5	12.96	36.62
FALSE	High	Master Protein	P47974	mRNA decay activator protein ZFP36L2 OS=Homo sapiens OX=9606 GN=ZFP36L2 PE=1 SV=3	0.001	FALSE	5.789	4	1	2	1	1	494	51	8.16	5.31	1	cell differentiation;cell division;cell proliferation;development;metabolic process;regulation of biological process;response to stimulus	cytoplasm;cytosol;nucleus	DNA binding;metal ion binding;protein binding;RNA binding	Pf00642, Pf04553	678	ENSG00000152518.7	ZFP36L2	2		TYROBP Causal Network; Preimplantation Embryo	0	0.971	0.867	1.151	1.244	1.039	0.993866	0.913699	0.966662	0.6676	0.996231	47.6	31.86	30.93	32.91	42.42	99.1	96.2	87.2	117.5	28.64	34.95
FALSE	High	Master Protein	Q9UBK9	Protein UXT OS=Homo sapiens OX=9606 GN=UXT PE=1 SV=1	0.001	FALSE	7.085	8	1	3	1	1	157	18.2	7.59	8.86	1	cell death;cell organization and biogenesis;cellular component movement;metabolic process;regulation of biological process;transport	cytoplasm;cytoskeleton;nucleus	protein binding	Pf02996	8409	ENSG00000126756.11	UXT	X			0	1.106	0.941	1.057	1.242	1.169	0.856025	0.948402	0.999979	0.54282	0.928597	71.47	63.29	65.71	64.73	64.73	94.9	104.9	89.3	110.9	27.71	57.81
FALSE	Low	Master Protein	O75161	Nephrocystin-4 OS=Homo sapiens OX=9606 GN=NPHP4 PE=1 SV=2	0.05	FALSE	1.927	1	1	6	1	1	1426	157.5	8.13	0	1	cell organization and biogenesis;cellular component movement;regulation of biological process;response to stimulus	cytoplasm;cytoskeleton;cytosol;membrane;nucleus	protein binding;structural molecule activity		261734	ENSG00000131697.17	NPHP4	1			0	0.896	0.903	1.252	1.242	1.122	0.976075	0.953754	0.922831	0.765463	0.968988	24.73	21.97	20.31	18.74	27.11	102	91.4	92.1	114.4	29.05	1.39
FALSE	High	Master Protein	Q9BQ15	SOSS complex subunit B1 OS=Homo sapiens OX=9606 GN=NABP2 PE=1 SV=1	0	FALSE	9.989	14	1	2	1	1	211	22.3	9.06	6.54	1	metabolic process;regulation of biological process;response to stimulus	cytosol;nucleus	DNA binding;protein binding	Pf01336	79035	ENSG00000139579.12	NABP2	12		Mesodermal Commitment Pathway	0	0.853	0.861	1.299	1.242	1.287	0.90248	0.907582	0.777187	0.659206	0.714701	20.74	32.24	8.11	61.6	27.59	105.8	90.2	91	113	21.49	3.56
FALSE	High	Master Protein	P07148	Fatty acid-binding protein, liver OS=Homo sapiens OX=9606 GN=FABP1 PE=1 SV=1	0	FALSE	54.248	68	6	46	6	1	127	14.2	7.18	149.2	6	metabolic process;regulation of biological process;response to stimulus;transport	cytoplasm;cytosol;nucleus;organelle lumen	antioxidant activity;catalytic activity;protein binding;transporter activity	Pf14651	2168	ENSG00000163586.9	FABP1	2	Fat digestion and absorption; PPAR signaling pathway	Selenium Metabolism and Selenoproteins; PPAR Alpha Pathway; PPAR signaling pathway	0	1.248	1.334	0.982	1.242	1.351	4.10373e-05	0.11584	0.796052	0.00318117	0.016995	57.43	75.09	80.09	66.13	63.53	114	106.9	83	96.1	49.45	55.75
FALSE	Medium	Master Protein	Q96B77	Transmembrane protein 186 OS=Homo sapiens OX=9606 GN=TMEM186 PE=2 SV=1	0.013	FALSE	2.945	6	1	2	1	1	213	24.9	9.86	5.03	1		membrane;mitochondrion			25880	ENSG00000184857.7	TMEM186	16			0	0.82	0.786	1.19	1.241	0.975	0.898182	0.833594	0.956488	0.762931	0.987452	0	0	0	0	0	111.7	91.6	87.8	108.9
FALSE	High	Master Protein	Q8WVK2	U4/U6.U5 small nuclear ribonucleoprotein 27 kDa protein OS=Homo sapiens OX=9606 GN=SNRNP27 PE=1 SV=1	0.002	FALSE	4.702	10	1	2	1	1	155	18.8	11.62	4.46	1	metabolic process	nucleus	protein binding	Pf08648	11017	ENSG00000124380.10	SNRNP27	2	Spliceosome		0	1.368	0.586	0.685	1.241	0.76	0.548879	0.433535	0.452668	0.817767	0.732919	47.27	6.18	14.61	16.18	16.62	118.5	125.8	69.5	86.2	32.99	33.44
FALSE	High	None	A4D2H0	cTAGE family member 15 OS=Homo sapiens OX=9606 GN=CTAGE15 PE=2 SV=1	0	FALSE	7.832	2	1	3	1	1	777	87.8	5.24	9.03	1	metabolic process;regulation of biological process;transport	membrane		Pf04111, Pf04156, Pf05557, Pf07926, Pf08317, Pf12718, Pf14662	441294	ENSG00000271079.1	CTAGE15; CTAGE15P	7			0	0.992	1.183	1.479	1.24	1.467	0.97502	0.833852	0.126036	0.22169	0.0209288	68.92	40.82	77.8	45.33	40.53	86.2	85.5	101.9	126.4	46.2	78.18
FALSE	High	None	A4FU28	cTAGE family member 9 OS=Homo sapiens OX=9606 GN=CTAGE9 PE=2 SV=2	0	FALSE	7.832	2	1	3	1	1	777	87.9	5.31	9.03	1	metabolic process	membrane		Pf04111, Pf04156, Pf12128, Pf12718	643854	ENSG00000236761.5	CTAGE9	6			0	0.992	1.183	1.479	1.24	1.467	0.97502	0.833852	0.126036	0.22169	0.0209288	68.92	40.82	77.8	45.33	40.53	86.2	85.5	101.9	126.4	46.2	78.18
FALSE	High	None	Q8IX94	cTAGE family member 4 OS=Homo sapiens OX=9606 GN=CTAGE4 PE=2 SV=3	0	FALSE	7.832	2	1	3	1	1	777	87.9	5.26	9.03	1	metabolic process	membrane		Pf04111, Pf04156, Pf08317, Pf12128, Pf12718, Pf14662	100128553; 100142659	ENSG00000225932.3	CTAGE4; CTAGE8	7			0	0.992	1.183	1.479	1.24	1.467	0.97502	0.833852	0.126036	0.22169	0.0209288	68.92	40.82	77.8	45.33	40.53	86.2	85.5	101.9	126.4	46.2	78.18
FALSE	High	None	Q86UF2	cTAGE family member 6 OS=Homo sapiens OX=9606 GN=CTAGE6 PE=2 SV=2	0	FALSE	7.832	2	1	3	1	1	777	87.8	5.16	9.03	1	metabolic process;regulation of biological process;transport	membrane		Pf04111, Pf04156, Pf05557, Pf07926, Pf08317, Pf12718, Pf14662	340307	ENSG00000271321.1	CTAGE6; CTAGE6P	7			0	0.992	1.183	1.479	1.24	1.467	0.97502	0.833852	0.126036	0.22169	0.0209288	68.92	40.82	77.8	45.33	40.53	86.2	85.5	101.9	126.4	46.2	78.18
FALSE	High	None	P0CG41	cTAGE family member 8 OS=Homo sapiens OX=9606 GN=CTAGE8 PE=3 SV=1	0	FALSE	7.832	2	1	3	1	1	777	88	5.31	9.03	1	metabolic process;regulation of biological process;transport	membrane		Pf04111, Pf04156, Pf05557, Pf07926, Pf08317, Pf12128, Pf12718, Pf14662	100142659	ENSG00000244693.1	CTAGE8	7			0	0.992	1.183	1.479	1.24	1.467	0.97502	0.833852	0.126036	0.22169	0.0209288	68.92	40.82	77.8	45.33	40.53	86.2	85.5	101.9	126.4	46.2	78.18
FALSE	High	Master Protein	O15498	Synaptobrevin homolog YKT6 OS=Homo sapiens OX=9606 GN=YKT6 PE=1 SV=1	0	FALSE	46.778	41	6	38	6	1	198	22.4	6.92	126.28	6	cell organization and biogenesis;transport	cytoplasm;cytosol;endoplasmic reticulum;endosome;Golgi;membrane;mitochondrion	catalytic activity;protein binding	Pf00957, Pf13774	10652	ENSG00000106636.7	YKT6	7	SNARE interactions in vesicular transport		0	0.993	0.877	1.059	1.24	1.037	0.923575	0.663192	0.998862	0.0234383	0.992073	19.47	19.76	19.17	22.39	18.33	98.3	112.6	75.8	113.4	21.64	28.08
FALSE	Medium	None	Q9UJT2	Testis-specific serine kinase substrate OS=Homo sapiens OX=9606 GN=TSKS PE=1 SV=3	0.043	FALSE	2.034	1	1	1	1	1	592	65	5.97	0	1	regulation of biological process	cytoplasm;cytoskeleton	protein binding	Pf15358	60385	ENSG00000126467.10	TSKS	19			0	3.234	2.404	0.952	1.239	3.08	3.3588e-06	0.109895	0.952144	0.801965	0.00251684	25.2	41.02	21.39	41.78	27.29	40.8	132	101.4	125.7	28.03	24.35
FALSE	Medium	None	Q8IXS0	Protein FAM217A OS=Homo sapiens OX=9606 GN=FAM217A PE=2 SV=2	0.043	FALSE	2.034	1	1	1	1	1	508	57.4	8.44	0	1				Pf15344	222826	ENSG00000145975.14	FAM217A	6			0	3.234	2.404	0.952	1.239	3.08	3.3588e-06	0.109895	0.952144	0.801965	0.00251684	25.2	41.02	21.39	41.78	27.29	40.8	132	101.4	125.7	28.03	24.35
FALSE	High	Master Protein	P53365	Arfaptin-2 OS=Homo sapiens OX=9606 GN=ARFIP2 PE=1 SV=1	0	FALSE	56.859	36	8	34	8	1	341	37.8	6.04	121.58	8	cell organization and biogenesis;cellular component movement;regulation of biological process;response to stimulus	cytoplasm;cytosol;membrane	nucleotide binding;protein binding	Pf03114, Pf06456	23647	ENSG00000132254.12	ARFIP2	11			0	1.026	0.981	1.049	1.239	1.093	0.918087	0.967589	0.999979	0.225841	0.961714	60.08	33.35	91.91	42.35	37.77	100.3	98.7	102.3	98.8	5.61	7.97
FALSE	High	Master Protein	Q99523	Sortilin OS=Homo sapiens OX=9606 GN=SORT1 PE=1 SV=3	0.004	FALSE	4.005	2	1	1	1	1	831	92	5.74	2.33	1	cell differentiation;cell organization and biogenesis;development;regulation of biological process;response to stimulus;transport	cell surface;cytosol;endoplasmic reticulum;endosome;Golgi;membrane;nucleus;vacuole	protein binding;receptor activity;signal transducer activity		6272	ENSG00000134243.11	SORT1	1	Lysosome; Neurotrophin signaling pathway	Brain-Derived Neurotrophic Factor (BDNF) signaling pathway	0	1.199	0.875	0.904	1.238	1.084	0.828799	0.951594	0.90682	0.784339	0.992073	15.76	18.61	21.94	22.56	24.21	96.2	115.3	84.2	104.3	14.98	0.38
FALSE	High	Master Protein	P62760	Visinin-like protein 1 OS=Homo sapiens OX=9606 GN=VSNL1 PE=1 SV=2	0	FALSE	39.906	38	6	21	6	1	191	22.1	5.15	58.85	6	regulation of biological process	cytosol;membrane	metal ion binding;protein binding	Pf00036, Pf13202, Pf13405, Pf13499, Pf13833	7447	ENSG00000163032.11	VSNL1	2			0	0.777	0.777	0.95	1.238	0.886	0.141603	0.134304	0.734206	0.0736133	0.590739	64.72	41.21	78.21	60.58	44.89	116.3	116.3	81.2	86.2	38.01	27.96
FALSE	High	Master Protein	Q13277	Syntaxin-3 OS=Homo sapiens OX=9606 GN=STX3 PE=1 SV=3	0	FALSE	50.111	25	6	38	6	1	289	33.1	5.44	146.99	6	cell organization and biogenesis;regulation of biological process;transport	membrane;vacuole	catalytic activity;protein binding	Pf00804, Pf02485, Pf05739	6809	ENSG00000166900.15	STX3	11	SNARE interactions in vesicular transport; Synaptic vesicle cycle	Synaptic Vesicle Pathway	0	0.898	0.942	1.087	1.238	0.996	0.868643	0.896823	0.998862	0.0256299	0.968988	29.29	45.94	54.6	61.56	31.54	103.5	100.6	107.3	88.6	21.88	24.78
FALSE	High	Master Protein	Q8N3D4	EH domain-binding protein 1-like protein 1 OS=Homo sapiens OX=9606 GN=EHBP1L1 PE=1 SV=2	0	FALSE	13.3	3	4	6	3	1	1523	161.8	4.83	13.88	4		endosome;membrane	protein binding	Pf00307, Pf10358, Pf11971, Pf12130	254102	ENSG00000173442.12	EHBP1L1	11			1	0.879	1.04	1.172	1.237	1.21	0.934026	0.995722	0.946598	0.708355	0.886021	41.06	64.96	55.22	69.57	32.95	82.8	119.9	82.5	114.9	63.2	42.01
FALSE	High	Master Protein	O43688	Phospholipid phosphatase 2 OS=Homo sapiens OX=9606 GN=PLPP2 PE=1 SV=1	0	FALSE	15.817	12	2	2	2	1	288	32.6	8.35	7.64	2	metabolic process;regulation of biological process;response to stimulus	membrane	catalytic activity;protein binding	Pf01569	8612	ENSG00000141934.9	PPAP2C; PLPP2	19	Fat digestion and absorption; Ether lipid metabolism; Phospholipase D signaling pathway; Glycerolipid metabolism; Sphingolipid metabolism; Choline metabolism in cancer; Glycerophospholipid metabolism; Fc gamma R-mediated phagocytosis; Metabolic pathways	Triacylglyceride Synthesis	0	0.839	0.721	0.725	1.237	0.609	0.915722	0.668547	0.475988	0.768015	0.175105	87.59	48.43	47.89	102.55	40.68	113.7	129.9	88.1	68.4	120.98	104.77
FALSE	High	Master Protein	Q9HB90	Ras-related GTP-binding protein C OS=Homo sapiens OX=9606 GN=RRAGC PE=1 SV=1	0	FALSE	12.851	9	3	7	1	1	399	44.2	5.1	16.16	3	cell communication;cell death;cell growth;metabolic process;regulation of biological process;response to stimulus	cytoplasm;cytosol;nucleus;vacuole	catalytic activity;metal ion binding;nucleotide binding;protein binding	Pf00025, Pf04670	64121	ENSG00000116954.7	RRAGC	1	mTOR signaling pathway	Target Of Rapamycin (TOR) Signaling	0	0.799	1.048	1.622	1.237	1.297	0.875687	0.989678	0.530931	0.779685	0.845344	0	0	0	0	0	96.5	77.2	101.2	125.2
FALSE	High	Master Protein	O00463	TNF receptor-associated factor 5 OS=Homo sapiens OX=9606 GN=TRAF5 PE=1 SV=2	0.001	FALSE	7.108	6	2	2	2	1	557	64.4	7.43	2.52	2	cell death;regulation of biological process;response to stimulus	cytoplasm;cytosol	metal ion binding;protein binding	Pf00917, Pf02176, Pf10046	7188	ENSG00000082512.14	TRAF5	1	Viral carcinogenesis; TNF signaling pathway; NOD-like receptor signaling pathway; Epstein-Barr virus infection; Pathways in cancer; NF-kappa B signaling pathway; Small cell lung cancer; Herpes simplex infection	RANKL/RANK (Receptor activator of NFKB (ligand)) Signaling Pathway; TNF related weak inducer of apoptosis (TWEAK) Signaling Pathway	0	1.024	0.533	0.643	1.237	0.659	0.97502	0.26841	0.329165	0.818088	0.46569	17.08	5.17	4.04	0	7.92	124.4	127.4	66.2	82	17.27	9.3
FALSE	High	Master Protein	P23497	Nuclear autoantigen Sp-100 OS=Homo sapiens OX=9606 GN=SP100 PE=1 SV=3	0.001	FALSE	7.09	3	2	4	2	1	879	100.4	8.22	5.99	2	cell organization and biogenesis;metabolic process;regulation of biological process;response to stimulus	cytoplasm;nucleus	DNA binding;protein binding	Pf00505, Pf01342, Pf03172, Pf09011	6672	ENSG00000067066.16	SP100	2	Viral carcinogenesis; Herpes simplex infection		0	1.166	0.986	1.095	1.236	1.219	0.859917	0.996544	0.998862	0.779685	0.929098	33.34	23.93	11.32	13.59	34.35	91.5	106.7	90.2	111.6	28.18	7.03
FALSE	High	Master Protein	O75419	Cell division control protein 45 homolog OS=Homo sapiens OX=9606 GN=CDC45 PE=1 SV=1	0	FALSE	8.821	4	2	2	2	1	566	65.5	5.53	2.68	2	cell organization and biogenesis;metabolic process;regulation of biological process;response to stimulus	cytoplasm;nucleus	catalytic activity;DNA binding;protein binding	Pf02724	8318	ENSG00000093009.9	CDC45	22	Cell cycle	Retinoblastoma (RB) in Cancer; Cell Cycle; DNA Replication; G1 to S cell cycle control	0	0.874	0.838	1.209	1.236	0.961	0.902251	0.829197	0.908499	0.710394	0.966493	22.63	27.24	20.75	58.79	28.36	117	107.4	98	77.5	24.78	44.9
FALSE	High	Master Protein	P68402	Platelet-activating factor acetylhydrolase IB subunit beta OS=Homo sapiens OX=9606 GN=PAFAH1B2 PE=1 SV=1	0	FALSE	61.817	51	5	67	5	1	229	25.6	5.92	216.02	5	metabolic process;regulation of biological process;transport	cytoplasm;cytosol;extracellular;membrane;organelle lumen	catalytic activity;protein binding	Pf00657, Pf13472	5049	ENSG00000168092.13	PAFAH1B2	11	Ether lipid metabolism; Metabolic pathways		0	1.027	0.997	1.251	1.236	1.28	0.750984	0.96769	0.337296	0.0219103	0.0701328	94.47	83.58	79.04	74.99	56.8	107.4	122.3	107.4	63	40.71	29.9
FALSE	Medium	None	Q14525	Keratin, type I cuticular Ha3-II OS=Homo sapiens OX=9606 GN=KRT33B PE=1 SV=3	0.014	TRUE	2.893	2	1	10	0	5	404	46.2	4.84	19.23	1	cell death;transport	cytosol;membrane	catalytic activity;motor activity;protein binding;structural molecule activity	Pf00038, Pf00529, Pf01576, Pf04156, Pf13514, Pf14362	3884	ENSG00000263012.1; ENSG00000131738.10	KRT33B	17; CHR_HSCHR17_1_CTG4			0	0.87	0.851	0.99	1.236	1.052	0.8668	0.672468	0.946598	0.390901	0.992073	26.66	13.3	34.57	68.57	58.69	100.9	107.2	85.8	106.1	62.88	44.86
FALSE	Medium	None	O76013	Keratin, type I cuticular Ha6 OS=Homo sapiens OX=9606 GN=KRT36 PE=2 SV=1	0.014	TRUE	2.893	1	1	10	0	5	467	52.2	4.94	19.23	1	cell death;regulation of biological process	cytoskeleton;cytosol	catalytic activity;motor activity;structural molecule activity	Pf00038, Pf01576	8689	ENSG00000126337.13	KRT36	17			0	0.87	0.851	0.99	1.236	1.052	0.8668	0.672468	0.946598	0.390901	0.992073	26.66	13.3	34.57	68.57	58.69	100.9	107.2	85.8	106.1	62.88	44.86
FALSE	Medium	None	O76015	Keratin, type I cuticular Ha8 OS=Homo sapiens OX=9606 GN=KRT38 PE=1 SV=3	0.014	TRUE	2.893	2	1	10	0	5	456	50.4	4.84	19.23	1	cell death	cytosol	protein binding;structural molecule activity	Pf00038, Pf02463, Pf09311	8687	ENSG00000171360.3	KRT38	17			0	0.87	0.851	0.99	1.236	1.052	0.8668	0.672468	0.946598	0.390901	0.992073	26.66	13.3	34.57	68.57	58.69	100.9	107.2	85.8	106.1	62.88	44.86
FALSE	Medium	None	O76014	Keratin, type I cuticular Ha7 OS=Homo sapiens OX=9606 GN=KRT37 PE=3 SV=3	0.014	TRUE	2.893	2	1	10	0	5	449	49.7	4.96	19.23	1	cell death	cytosol	structural molecule activity	Pf00038, Pf14643	8688	ENSG00000108417.3; ENSG00000263022.1	KRT37	17; CHR_HSCHR17_1_CTG4			0	0.87	0.851	0.99	1.236	1.052	0.8668	0.672468	0.946598	0.390901	0.992073	26.66	13.3	34.57	68.57	58.69	100.9	107.2	85.8	106.1	62.88	44.86
FALSE	Medium	None	Q14532	Keratin, type I cuticular Ha2 OS=Homo sapiens OX=9606 GN=KRT32 PE=2 SV=3	0.014	TRUE	2.893	2	1	10	0	5	448	50.3	4.84	19.23	1	cell death;cell organization and biogenesis	cytoskeleton;cytosol	catalytic activity;motor activity;structural molecule activity	Pf00038, Pf01576, Pf05287, Pf06160, Pf12128, Pf13514	3882	ENSG00000108759.3	KRT32	17			0	0.87	0.851	0.99	1.236	1.052	0.8668	0.672468	0.946598	0.390901	0.992073	26.66	13.3	34.57	68.57	58.69	100.9	107.2	85.8	106.1	62.88	44.86
FALSE	Medium	None	Q15323	Keratin, type I cuticular Ha1 OS=Homo sapiens OX=9606 GN=KRT31 PE=1 SV=3	0.014	TRUE	2.893	2	1	10	0	5	416	47.2	4.88	19.23	1	cell death;cell organization and biogenesis	cytosol	protein binding;structural molecule activity	Pf00038, Pf04156, Pf13514, Pf14362, Pf14643	3881	ENSG00000094796.4; ENSG00000262993.1	KRT31	17; CHR_HSCHR17_1_CTG4			0	0.87	0.851	0.99	1.236	1.052	0.8668	0.672468	0.946598	0.390901	0.992073	26.66	13.3	34.57	68.57	58.69	100.9	107.2	85.8	106.1	62.88	44.86
FALSE	Medium	None	Q2M2I5	Keratin, type I cytoskeletal 24 OS=Homo sapiens OX=9606 GN=KRT24 PE=1 SV=1	0.014	TRUE	2.893	1	1	10	0	5	525	55.1	4.96	19.23	1	cell death;transport	cytosol;membrane	structural molecule activity;transporter activity	Pf00529, Pf02321, Pf13437, Pf13533	192666	ENSG00000167916.4	KRT24	17			0	0.87	0.851	0.99	1.236	1.052	0.8668	0.672468	0.946598	0.390901	0.992073	26.66	13.3	34.57	68.57	58.69	100.9	107.2	85.8	106.1	62.88	44.86
FALSE	High	Master Protein	Q3SXM5	Inactive hydroxysteroid dehydrogenase-like protein 1 OS=Homo sapiens OX=9606 GN=HSDL1 PE=1 SV=3	0	FALSE	12.261	12	2	8	2	1	330	37	8.72	18.8	2		mitochondrion		Pf00106, Pf13460, Pf13561	83693	ENSG00000103160.11	HSDL1	16			0	1.169	0.967	1.059	1.236	1.347	0.840267	0.981516	0.999979	0.72955	0.749588	30.14	28.4	14.17	9.91	19.08	85	108.1	92.6	114.4	25.35	15.17
FALSE	High	Master Protein	P55317	Hepatocyte nuclear factor 3-alpha OS=Homo sapiens OX=9606 GN=FOXA1 PE=1 SV=2	0.001	FALSE	6.532	2	1	4	1	1	472	49.1	8.82	9.9	1	cell communication;cell differentiation;cell organization and biogenesis;development;metabolic process;regulation of biological process;response to stimulus	nucleus	DNA binding;protein binding	Pf00250, Pf08430, Pf09354	3169	ENSG00000129514.5	FOXA1	14		Mesodermal Commitment Pathway; Focal Adhesion-PI3K-Akt-mTOR-signaling pathway; Endoderm Differentiation	0	0.951	0.537	1.12	1.236	0.972	0.989869	0.0221464	0.980391	0.687189	0.968988	33.28	8.47	27.23	87.35	32.3	113.3	120.4	56.1	110.2	15.6	36.03
FALSE	High	Master Protein Candidate	P55318	Hepatocyte nuclear factor 3-gamma OS=Homo sapiens OX=9606 GN=FOXA3 PE=1 SV=2	0.001	FALSE	6.532	3	1	4	1	1	350	37.1	7.47	9.9	1	cell communication;cell differentiation;cell organization and biogenesis;cellular homeostasis;development;metabolic process;regulation of biological process;response to stimulus	cytoskeleton;nucleus	DNA binding;protein binding	Pf00250	3171	ENSG00000170608.2	FOXA3	19	Maturity onset diabetes of the young		0	0.951	0.537	1.12	1.236	0.972	0.989869	0.0221464	0.980391	0.687189	0.968988	33.28	8.47	27.23	87.35	32.3	113.3	120.4	56.1	110.2	15.6	36.03
FALSE	High	Master Protein	Q5T1M5	FK506-binding protein 15 OS=Homo sapiens OX=9606 GN=FKBP15 PE=1 SV=2	0	FALSE	58.906	13	10	31	10	1	1219	133.5	5.2	68.69	10	cell differentiation;cell organization and biogenesis;cellular component movement;metabolic process;regulation of biological process;transport	cytoplasm;cytoskeleton;endosome;extracellular;Golgi;membrane;nucleus	catalytic activity;motor activity;protein binding;structural molecule activity;transporter activity	Pf00038, Pf00254, Pf00769, Pf01442, Pf01496, Pf01576, Pf01875, Pf02463, Pf03938, Pf03961, Pf03962, Pf04111, Pf04156, Pf04849, Pf05029, Pf05483, Pf05557, Pf05622, Pf05667, Pf05701, Pf05911, Pf06160, Pf06248, Pf07111, Pf07888, Pf07926, Pf08317, Pf08614, Pf09726, Pf09728, Pf09730, Pf09731, Pf09744, Pf09755, Pf09789, Pf10174, Pf10186, Pf10211, Pf10234, Pf10498, Pf11559, Pf12128, Pf12718, Pf12795, Pf1…	23307	ENSG00000119321.8	FKBP15	9		TYROBP Causal Network	0	0.875	0.798	1.206	1.236	1.063	0.835883	0.248595	0.731511	0.0736133	0.972306	37.64	48.21	50.97	66.84	41.05	94.6	101.6	69	134.7	29.41	41.2
FALSE	High	Master Protein	Q9UBR2	Cathepsin Z OS=Homo sapiens OX=9606 GN=CTSZ PE=1 SV=1	0	FALSE	13.004	13	3	8	3	1	303	33.8	7.11	9.99	3	cell organization and biogenesis;metabolic process;regulation of biological process;transport	cell surface;endoplasmic reticulum;extracellular;membrane;organelle lumen;vacuole	catalytic activity;protein binding	Pf00112	1522	ENSG00000101160.13	CTSZ	20	Lysosome; Apoptosis		0	0.96	1.076	1.053	1.235	0.991	0.993866	0.989567	0.998862	0.554112	0.973403	13.98	11.46	36.51	48.03	14.4	101.5	94.5	110.8	93.2	14.03	44.51
FALSE	High	Master Protein	P51617	Interleukin-1 receptor-associated kinase 1 OS=Homo sapiens OX=9606 GN=IRAK1 PE=1 SV=2	0	FALSE	26.447	13	4	9	4	1	712	76.5	6.62	31.73	4	cell organization and biogenesis;defense response;metabolic process;regulation of biological process;response to stimulus	cytoplasm;cytosol;membrane;nucleus	catalytic activity;nucleotide binding;protein binding;signal transducer activity	Pf00069, Pf00531, Pf07714	3654	ENSG00000184216.13	IRAK1	X	Chagas disease (American trypanosomiasis); Epstein-Barr virus infection; Neurotrophin signaling pathway; Leishmaniasis; NF-kappa B signaling pathway; Tuberculosis; Pertussis; Toxoplasmosis; Measles; Toll-like receptor signaling pathway	Simplified Depiction of MYD88 Distinct Input-Output Pathway; TLR4 Signaling and Tolerance; Melatonin metabolism and effects; EBV LMP1 signaling; Regulation of toll-like receptor signaling pathway; Toll-like receptor signaling pathway; ApoE and miR-146 in inflammation and atherosclerosis; Toll-like Receptor Signaling; Interleukin-1 Induced Activation of NF-kappa-B; Structural Pathway of Interleuki…	0	1.027	0.937	1.182	1.235	1.243	0.967224	0.943639	0.920989	0.558728	0.791155	33.72	29.23	14.64	34.11	24.6	110.4	91.4	133.4	64.8	47.96	13.54
FALSE	Medium	Master Protein	Q9H2H9	Sodium-coupled neutral amino acid transporter 1 OS=Homo sapiens OX=9606 GN=SLC38A1 PE=1 SV=1	0.028	FALSE	2.383	2	1	2	1	1	487	54	7.02	2.06	1	transport	membrane	protein binding;transporter activity	Pf01490	81539	ENSG00000111371.15	SLC38A1	12	Glutamatergic synapse; GABAergic synapse	Synaptic Vesicle Pathway	0	0.903	0.841	1.15	1.235	1.038	0.976234	0.891593	0.976849	0.768015	0.999858	16.34	5.32	19.49	8.67	8.84	105.8	95.5	89	109.8	4.75	19.58
FALSE	High	Master Protein	A8MXV4	Nucleoside diphosphate-linked moiety X motif 19 OS=Homo sapiens OX=9606 GN=NUDT19 PE=1 SV=1	0	FALSE	103.65	61	15	83	15	1	375	42.2	7.64	299.01	15	metabolic process	mitochondrion;organelle lumen	catalytic activity;metal ion binding;protein binding		390916	ENSG00000213965.3	NUDT19	19	Peroxisome		0	1.053	1.013	1.147	1.233	1.178	0.701361	0.986611	0.883316	0.0230322	0.428604	33.77	46.66	28.16	42.78	29.89	84.7	111.7	84.4	119.3	18.73	27.56
FALSE	High	None	Q9H2X9	Solute carrier family 12 member 5 OS=Homo sapiens OX=9606 GN=SLC12A5 PE=1 SV=3	0.001	FALSE	7.532	1	1	8	1	1	1139	126.1	6.73	24.65	1	cell communication;cellular homeostasis;response to stimulus;transport	membrane	protein binding;transporter activity	Pf00324, Pf13520	57468	ENSG00000124140.13	SLC12A5	20	GABAergic synapse		0	0.833	0.936	1.385	1.233	1.154	0.923575	0.964411	0.743662	0.76607	0.961714	24.38	19.41	39.51	24.93	20.32	101.9	84.9	95.4	117.7	19.61	37.15
FALSE	High	None	Q9NR22	Protein arginine N-methyltransferase 8 OS=Homo sapiens OX=9606 GN=PRMT8 PE=1 SV=2	0	FALSE	11.266	8	2	10	2	1	394	45.3	6.93	28.96	2	cell organization and biogenesis;metabolic process;regulation of biological process	cytosol;membrane;nucleus	catalytic activity;protein binding	Pf08241, Pf12847, Pf13847	56341	ENSG00000111218.11	PRMT8	12			0	0.884	0.919	0.928	1.233	0.85	0.914228	0.926462	0.87173	0.400182	0.599839	48.17	52.03	34.27	39.53	25.47	110.8	61.6	101.1	126.4	73.44	110.59
FALSE	High	Master Protein	Q9NVZ3	Adaptin ear-binding coat-associated protein 2 OS=Homo sapiens OX=9606 GN=NECAP2 PE=1 SV=1	0	FALSE	13.534	15	2	2	2	1	263	28.3	8.38	8.1	2	transport	membrane		Pf07933	55707	ENSG00000157191.19	NECAP2	1			0	1.052	1.507	1.307	1.233	1.539	0.931464	0.443347	0.767088	0.554112	0.0664742	52.09	0	10.8	0	28.09	112.1	56	59.3	172.6	110.42	128.67
FALSE	High	Master Protein	O43665	Regulator of G-protein signaling 10 OS=Homo sapiens OX=9606 GN=RGS10 PE=1 SV=2	0	FALSE	11.493	15	2	4	2	1	173	20.2	5.49	13.66	2	regulation of biological process;response to stimulus	cytoplasm;cytosol;membrane;nucleus	enzyme regulator activity;protein binding	Pf00615	6001	ENSG00000148908.14	RGS10	10		Calcium Regulation in the Cardiac Cell; Mesodermal Commitment Pathway; Myometrial Relaxation and Contraction Pathways	0	1.311	0.595	1.156	1.231	1.364	0.0741724	0.0272641	0.91578	0.401255	0.173252	50.76	32.86	37.7	61.02	39.17	72.6	123	55.6	148.9	22.44	41.23
FALSE	High	Master Protein	O43657	Tetraspanin-6 OS=Homo sapiens OX=9606 GN=TSPAN6 PE=1 SV=1	0	FALSE	15.207	10	2	11	2	1	245	27.5	8.1	27.48	2	regulation of biological process;response to stimulus	membrane	protein binding;signal transducer activity	Pf00335	7105	ENSG00000000003.14	TSPAN6	X			0	0.789	1.037	1.607	1.231	1.319	0.331606	0.998828	0.00237885	0.142056	0.286779	32.6	44.92	50.1	51.04	60.26	88	87.4	92.7	131.8	44.13	56.08
FALSE	High	Master Protein	P49789	Bis(5'-adenosyl)-triphosphatase OS=Homo sapiens OX=9606 GN=FHIT PE=1 SV=3	0	FALSE	24.494	29	3	8	3	1	147	16.8	7.08	28.93	3	cell death;metabolic process;regulation of biological process;response to stimulus	cytoplasm;cytosol;membrane;mitochondrion;nucleus	catalytic activity;nucleotide binding;protein binding	Pf01230, Pf11969	2272	ENSG00000189283.9	FHIT	3	Purine metabolism; Non-small cell lung cancer; Small cell lung cancer		0	0.901	0.984	1.343	1.229	1.21	0.97502	0.989567	0.800071	0.72181	0.912611	23.83	45.66	10.06	7.16	39.67	97.7	88	96.1	118.2	78.66	57.4
FALSE	High	Master Protein	O75683	Surfeit locus protein 6 OS=Homo sapiens OX=9606 GN=SURF6 PE=1 SV=3	0	FALSE	15.028	11	2	5	2	1	361	41.4	10.64	15.22	2		nucleus	DNA binding;protein binding;RNA binding	Pf04935	6838	ENSG00000281309.1; ENSG00000148296.6	SURF6	9; CHR_HG2030_PATCH			0	0.667	0.654	1.472	1.229	0.982	0.122054	0.0985171	0.369494	0.593664	0.962734	34.31	46.96	50.71	48.39	26.05	122.4	97.2	93	87.4	65.01	50.41
FALSE	Medium	Master Protein	Q99973	Telomerase protein component 1 OS=Homo sapiens OX=9606 GN=TEP1 PE=1 SV=2	0.011	FALSE	3.08	0	1	3	1	1	2627	290.3	7.97	1.87	1	cell organization and biogenesis;metabolic process	chromosome;cytoplasm;nucleus;spliceosomal complex	catalytic activity;nucleotide binding;protein binding;RNA binding	Pf00400, Pf05386, Pf05729, Pf05731, Pf13271	7011	ENSG00000129566.12	TEP1	14			0	1.328	0.839	0.776	1.228	1.03	0.169585	0.784134	0.236265	0.427021	0.996231	11.98	31.71	9.74	33.3	16.13	95.3	126.5	80	98.2	12.39	12
FALSE	Low	Master Protein	O75691	Small subunit processome component 20 homolog OS=Homo sapiens OX=9606 GN=UTP20 PE=1 SV=3	0.145	FALSE	1.079	1	1	2	1	1	2785	318.2	7.39	0	1	metabolic process;regulation of biological process	cytoplasm;membrane;nucleus	protein binding;RNA binding	Pf07539	27340	ENSG00000120800.4	UTP20	12			0	0.977	0.965	1.213	1.227	1.184	0.991281	0.989567	0.958511	0.836758	0.953551	0	0	0	0	0	96.9	94.7	93.6	114.8
FALSE	High	Master Protein	Q86YS7	C2 domain-containing protein 5 OS=Homo sapiens OX=9606 GN=C2CD5 PE=1 SV=1	0	FALSE	16.597	8	4	8	4	1	1000	110.4	5.69	13.43	4	cell organization and biogenesis;regulation of biological process;response to stimulus;transport	cytoplasm;cytosol;membrane	metal ion binding;protein binding	Pf00168, Pf01906	9847	ENSG00000111731.12	C2CD5; KIAA0528	12			0	0.863	0.865	1.219	1.227	0.901	0.877817	0.855526	0.893742	0.586625	0.844967	27.48	27.72	37.56	34.97	17.14	112.8	99.8	97.6	89.8	77.38	20.79
FALSE	Low	None	F2Z3M2	Uncharacterized protein C17orf112 OS=Homo sapiens OX=9606 GN=C17orf112 PE=4 SV=1	0.159	FALSE	1.008	5	1	2	1	1	114	12.7	5.97	0	1					100506650		C17orf112	17			0	1.158	1.141	1.242	1.227	1.277	0.865976	0.953754	0.942592	0.796743	0.866553	41.81	40.53	44.93	45.56	48.43	74.5	100.8	98.6	126.2	35.52	37.56
FALSE	Medium	Master Protein	Q8TEB9	Rhomboid-related protein 4 OS=Homo sapiens OX=9606 GN=RHBDD1 PE=1 SV=1	0.011	FALSE	3.083	6	1	3	1	1	315	35.8	8.24	0	1	cell death;cell differentiation;metabolic process;regulation of biological process;response to stimulus	endoplasmic reticulum;membrane;mitochondrion	catalytic activity;protein binding	Pf01694	84236	ENSG00000144468.16	RHBDD1	2			0	0.889	0.841	1.159	1.225	1.03	0.97502	0.919837	0.995253	0.832685	0.999817	15.35	29.3	37.11	36.19	36.86	106.4	94.5	89.5	109.6	21.17	20.22
FALSE	Low	Master Protein	Q9H8H2	Probable ATP-dependent RNA helicase DDX31 OS=Homo sapiens OX=9606 GN=DDX31 PE=1 SV=2	0.073	FALSE	1.578	2	1	2	1	1	851	94	9.99	1.73	1	metabolic process	cytoplasm;Golgi;nucleus	catalytic activity;DNA binding;nucleotide binding;protein binding;RNA binding	Pf00270, Pf00271, Pf04851, Pf13959	64794	ENSG00000125485.17	DDX31	9			0	1.573	0.904	0.703	1.224	1.106	0.0563485	0.946325	0.198548	0.727987	0.961714	64.64	0	31.95	0	0	87.3	137.3	78.9	96.5		56.52
FALSE	High	Master Protein	Q8NCA5	Protein FAM98A OS=Homo sapiens OX=9606 GN=FAM98A PE=1 SV=1	0	FALSE	59.588	22	7	54	6	1	519	55.4	9.03	164.12	7	metabolic process;regulation of biological process		catalytic activity;protein binding;RNA binding	Pf10239	25940		FAM98A	2			0	0.893	0.868	1.238	1.224	1.076	0.882477	0.722171	0.636368	0.19748	0.968988	28.67	32.15	34.64	45.22	37.51	117	86.1	84.7	112.2	7.76	15.76
FALSE	High	Master Protein	P45984	Mitogen-activated protein kinase 9 OS=Homo sapiens OX=9606 GN=MAPK9 PE=1 SV=2	0	FALSE	16.493	9	3	18	2	1	424	48.1	5.63	40.84	3	metabolic process;regulation of biological process;response to stimulus	cytoplasm;cytosol;mitochondrion;nucleus	catalytic activity;nucleotide binding;protein binding;signal transducer activity	Pf00069, Pf01636, Pf07714, Pf14531	5601	ENSG00000050748.17	MAPK9	5	Dopaminergic synapse; Chagas disease (American trypanosomiasis); Th1 and Th2 cell differentiation; T cell receptor signaling pathway; TNF signaling pathway; NOD-like receptor signaling pathway; Osteoclast differentiation; Hepatitis B; Insulin signaling pathway; Pancreatic cancer; FoxO signaling pathway; Prolactin signaling pathway; Epstein-Barr virus infection; Neurotrophin signaling pathway; Pro…	IL-1 signaling pathway; TNF related weak inducer of apoptosis (TWEAK) Signaling Pathway; T-Cell antigen Receptor (TCR) Signaling Pathway; Wnt Signaling in Kidney Disease; Regulation of toll-like receptor signaling pathway; Canonical and Non-Canonical TGF-B signaling; DNA Damage Response (only ATM dependent); T-Cell antigen Receptor (TCR) pathway during Staphylococcus aureus infection; Insulin Sig…	0	1.063	0.858	0.987	1.224	1.039	0.911147	0.85145	0.964856	0.593664	0.999817	25.26	17.32	27.72	21.95	18.28	90.3	79.2	136.6	93.9	37.8	16.32
FALSE	High	Master Protein	Q86VX9	Vacuolar fusion protein MON1 homolog A OS=Homo sapiens OX=9606 GN=MON1A PE=1 SV=3	0.01	FALSE	3.194	2	1	2	1	1	652	72.8	8.18	5.61	1											0	0.745	0.753	1.854	1.224	0.612	0.494299	0.610499	0.0609853	0.710394	0.0248205	74.27	22.97	105.36	123.99	88.98	128.6	95.8	96.9	78.7		92.69
FALSE	High	Master Protein	O95749	Geranylgeranyl pyrophosphate synthase OS=Homo sapiens OX=9606 GN=GGPS1 PE=1 SV=1	0	FALSE	10.747	16	3	4	3	1	300	34.8	6.14	4.91	3	metabolic process;regulation of biological process	cytoplasm;cytosol	catalytic activity;metal ion binding;protein binding	Pf00348	9453	ENSG00000152904.11	GGPS1	1	Terpenoid backbone biosynthesis; Metabolic pathways		0	0.759	0.357	0.692	1.223	0.746	0.823401	0.000307619	0.477462	0.808111	0.635673	30.55	10.6	50.14	104.71	29.89	129.8	98.5	96.4	75.4	34.61	14.17
FALSE	High	Master Protein	Q13330	Metastasis-associated protein MTA1 OS=Homo sapiens OX=9606 GN=MTA1 PE=1 SV=2	0	FALSE	38.792	11	7	25	3	1	715	80.7	9.26	66.9	7	cell organization and biogenesis;metabolic process;regulation of biological process;response to stimulus	cytoplasm;cytoskeleton;cytosol;nucleus	catalytic activity;DNA binding;metal ion binding;protein binding	Pf00249, Pf00320, Pf01426, Pf01448	9112	ENSG00000182979.17	MTA1	14			0	0.94	0.74	1.123	1.223	1.039	0.989434	0.236769	0.972282	0.442143	0.996231	41.4	29.04	61.06	35.28	32.11	110.2	91.4	67.2	131.3	32.15	44.03
FALSE	High	Master Protein	O15111	Inhibitor of nuclear factor kappa-B kinase subunit alpha OS=Homo sapiens OX=9606 GN=CHUK PE=1 SV=2	0.001	FALSE	7.412	3	2	3	2	1	745	84.6	6.73	9.08	2	cell differentiation;defense response;metabolic process;regulation of biological process;response to stimulus	cytoplasm;cytosol;nucleus	catalytic activity;nucleotide binding;protein binding	Pf00069, Pf07714, Pf12179	1147	ENSG00000213341.10	CHUK	10	Chagas disease (American trypanosomiasis); Th1 and Th2 cell differentiation; T cell receptor signaling pathway; TNF signaling pathway; NOD-like receptor signaling pathway; Osteoclast differentiation; Hepatitis B; Pancreatic cancer; FoxO signaling pathway; Chronic myeloid leukemia; Antifolate resistance; Epstein-Barr virus infection; B cell receptor signaling pathway; Acute myeloid leukemia; MAPK …	RANKL/RANK (Receptor activator of NFKB (ligand)) Signaling Pathway; RIG-I-like Receptor Signaling; Regulation of toll-like receptor signaling pathway; Toll-like Receptor Signaling; Estrogen signaling pathway; Canonical and Non-canonical Notch signaling; NLR Proteins; Structural Pathway of Interleukin 1 (IL-1); Apoptosis; Photodynamic therapy-induced NF-kB survival signaling; IL-1 signaling pathwa…	0	1.059	0.838	1.019	1.222	1.052	0.929766	0.867806	0.995898	0.673018	0.992073	18.8	11.86	21.06	13.37	12.33	88.9	82.6	125.8	102.7	43.23	24.72
FALSE	High	Master Protein	Q9Y6M5	Zinc transporter 1 OS=Homo sapiens OX=9606 GN=SLC30A1 PE=1 SV=3	0	FALSE	9.935	9	2	5	2	1	507	55.3	6.48	16.73	2	cellular homeostasis;regulation of biological process;response to stimulus;transport	cytoplasm;endoplasmic reticulum;Golgi;membrane	protein binding;transporter activity	Pf01545	7779	ENSG00000170385.9	SLC30A1	1	Mineral absorption	Zinc homeostasis	0	1.078	0.639	0.823	1.222	0.788	0.816421	0.0066244	0.445425	0.498068	0.217594	80.21	38.56	42.55	24.05	42.89	167	101.8	60.1	71.2		101.25
FALSE	High	Master Protein	Q9NYT0	Pleckstrin-2 OS=Homo sapiens OX=9606 GN=PLEK2 PE=1 SV=1	0	FALSE	52.558	27	6	26	6	1	353	39.9	9.41	87.47	6	cell organization and biogenesis;regulation of biological process;response to stimulus	cytoplasm;cytoskeleton;membrane		Pf00169, Pf00610, Pf15410, Pf15413	26499	ENSG00000100558.8	PLEK2	14			0	1.113	0.885	1	1.222	0.91	0.653319	0.85886	0.963574	0.46972	0.845344	44.83	34.66	36.93	33.96	37.83	99.6	141.3	72.2	86.9	33.24	30.25
FALSE	High	Master Protein	Q9Y5W7	Sorting nexin-14 OS=Homo sapiens OX=9606 GN=SNX14 PE=1 SV=3	0.003	FALSE	4.327	1	1	1	1	1	946	110.1	6.7	2.14	1	cell organization and biogenesis;transport	endosome;membrane;vacuole		Pf00615, Pf00787, Pf02194, Pf08628	57231	ENSG00000135317.12	SNX14	6			0	0.612	0.837	1.671	1.222	1.022	0.348088	0.89827	0.363867	0.788854	0.996231	0	0	48.31	48.31	48.31	115.3	70.5	96.4	117.8
FALSE	High	Master Protein	Q13428	Treacle protein OS=Homo sapiens OX=9606 GN=TCOF1 PE=1 SV=3	0	FALSE	60.499	7	10	56	10	1	1488	152	9.04	108.27	10	cell organization and biogenesis;regulation of biological process;transport	cytosol;nucleus	protein binding;RNA binding;transporter activity	Pf03546	6949	ENSG00000070814.17	TCOF1	5	Ribosome biogenesis in eukaryotes		0	0.941	0.917	1.006	1.221	1.053	0.987056	0.829197	0.915148	0.102905	0.98817	22.06	25.81	40.92	50.64	49.39	95.7	116.5	78.1	109.8	18.84	25.91
TRUE	High	Master Protein	Q86X52	Chondroitin sulfate synthase 1 OS=Homo sapiens OX=9606 GN=CHSY1 PE=1 SV=3	0.007	FALSE	3.569	2	1	1	1	1	802	91.7	9.23	0	1	metabolic process;regulation of biological process;response to stimulus	extracellular;Golgi;membrane	catalytic activity;metal ion binding	Pf02434, Pf02709, Pf05679, Pf10111	22856	ENSG00000131873.5	CHSY1	15	Metabolic pathways; Glycosaminoglycan biosynthesis - chondroitin sulfate / dermatan sulfate		0	100	100	1.248	1.22	100	4.49643e-16	3.59486e-16	0.971175	0.830811	3.9087e-16			59.93	60.62			122.3	125.1	152.7
FALSE	High	Master Protein	Q9Y241	HIG1 domain family member 1A, mitochondrial OS=Homo sapiens OX=9606 GN=HIGD1A PE=1 SV=1	0	FALSE	16.414	24	1	7	1	1	93	10.1	9.79	27.1	1	metabolic process;regulation of biological process;response to stimulus;transport	membrane;mitochondrion		Pf04588	25994	ENSG00000181061.13	HIGD1A	3			0	1.533	1.288	1	1.22	1.645	0.308481	0.909091	0.980391	0.839438	0.451281	132.77	132.77	90.06	97.05	126.52	65.3	100	84.1	150.6	139.07	99.02
FALSE	High	Master Protein	Q9BV57	1,2-dihydroxy-3-keto-5-methylthiopentene dioxygenase OS=Homo sapiens OX=9606 GN=ADI1 PE=1 SV=1	0	FALSE	26.448	39	5	30	5	1	179	21.5	5.68	86.21	5	metabolic process;regulation of biological process	cytoplasm;cytosol;membrane;nucleus	catalytic activity;metal ion binding;protein binding	Pf02311, Pf03079, Pf07883	55256	ENSG00000182551.13	ADI1	2	Metabolic pathways; Cysteine and methionine metabolism		0	0.973	0.906	1.091	1.22	1.056	0.987056	0.783717	0.995898	0.116762	0.986596	39.07	47.33	56.26	59.09	58.68	79.3	99	98.5	123.2	38.8	26.86
FALSE	High	Master Protein	O43306	Adenylate cyclase type 6 OS=Homo sapiens OX=9606 GN=ADCY6 PE=1 SV=2	0.001	FALSE	6.754	2	1	4	1	1	1168	130.5	8.22	10.47	1	metabolic process;regulation of biological process;response to stimulus	membrane	catalytic activity;metal ion binding;nucleotide binding;protein binding	Pf00211, Pf06327	112	ENSG00000174233.11	ADCY6	12	Longevity regulating pathway - multiple species; Vascular smooth muscle contraction; Glutamatergic synapse; Ovarian steroidogenesis; Dilated cardiomyopathy; Bile secretion; Phospholipase D signaling pathway; cGMP-PKG signaling pathway; Renin secretion; Purine metabolism; Rap1 signaling pathway; Progesterone-mediated oocyte maturation; Oxytocin signaling pathway; Circadian entrainment; Endocrine a…	Calcium Regulation in the Cardiac Cell; G Protein Signaling Pathways; Chemokine signaling pathway; Myometrial Relaxation and Contraction Pathways	0	0.796	1.026	1.148	1.22	1.007	0.874696	0.998828	0.980391	0.803666	0.99332	25.41	41.06	30.96	33.09	27.23	115.6	92.1	86.6	105.7	30.64	46.29
FALSE	High	None	Q86XE0	Sorting nexin-32 OS=Homo sapiens OX=9606 GN=SNX32 PE=1 SV=1	0.002	FALSE	5.09	3	1	4	1	1	403	46.4	7.09	3.34	1	cell organization and biogenesis;regulation of biological process;transport	endosome	protein binding	Pf00787, Pf09325	254122	ENSG00000172803.17	SNX32	11	Endocytosis		0	1.121	1.193	1.148	1.22	1.261	0.908853	0.91416	0.978447	0.773606	0.874045	39	57.9	27.97	69.55	41.18	79	111.8	94.2	115	34.99	24.71
FALSE	High	Master Protein	Q9Y530	ADP-ribose glycohydrolase OARD1 OS=Homo sapiens OX=9606 GN=OARD1 PE=1 SV=2	0.001	FALSE	5.593	8	1	2	1	1	152	17	8.31	6.05	1	metabolic process		catalytic activity;protein binding	Pf01661	221443	ENSG00000124596.16	OARD1	6			0	1.096	0.914	1.018	1.22	1.115	0.863354	0.948402	0.982335	0.704647	0.961714	24.7	20.61	24.4	24.62	26.66	97	106.3	88.6	108.1	27.71	25.45
FALSE	High	Master Protein	P49757	Protein numb homolog OS=Homo sapiens OX=9606 GN=NUMB PE=1 SV=2	0	FALSE	36.573	17	7	18	7	1	651	70.8	8.51	56.13	7	cell differentiation;cell division;cell organization and biogenesis;cell proliferation;development;regulation of biological process	cytoplasm;endosome;membrane;nucleus	protein binding	Pf00640, Pf06311, Pf08416	8650	ENSG00000133961.19	NUMB	14	Notch signaling pathway	Notch Signaling Pathway; Notch Signaling Pathway	0	0.947	0.883	1.208	1.22	1.09	0.989217	0.796014	0.734206	0.213716	0.961714	48.06	23.08	53.59	58.97	48.04	104.8	113.6	68.4	113.2	27.68	42.29
FALSE	High	Master Protein	Q03701	CCAAT/enhancer-binding protein zeta OS=Homo sapiens OX=9606 GN=CEBPZ PE=1 SV=3	0	FALSE	105.83	25	17	56	17	1	1054	120.9	5.94	175.98	17	metabolic process;regulation of biological process	nucleus	DNA binding;RNA binding	Pf03914	10153	ENSG00000115816.14	CEBPZ	2		Gastric cancer network 2	0	1.019	0.721	0.943	1.219	0.936	0.840569	0.0204024	0.603131	0.102905	0.789821	37.99	28.18	35.18	47.2	30.58	123.3	109.9	70.5	96.2	20.58	5
FALSE	High	Master Protein	Q9Y2H1	Serine/threonine-protein kinase 38-like OS=Homo sapiens OX=9606 GN=STK38L PE=1 SV=3	0.002	FALSE	5.011	4	1	1	1	1	464	54	6.81	2.19	1	metabolic process;regulation of biological process;response to stimulus	cytoplasm;cytoskeleton;cytosol;membrane	catalytic activity;metal ion binding;nucleotide binding;protein binding	Pf00069, Pf00433, Pf01636, Pf07714, Pf14531	23012	ENSG00000211455.7	STK38L	12			0	0.817	0.878	1.381	1.219	1.07	0.902251	0.945903	0.766509	0.799154	0.992472	10.14	0.24	8.02	0	0.32	107.5	83.2	94.3	115	49.26	7.64
FALSE	High	Master Protein	Q9H2K0	Translation initiation factor IF-3, mitochondrial OS=Homo sapiens OX=9606 GN=MTIF3 PE=1 SV=4	0	FALSE	8.567	9	2	4	2	1	278	31.7	9.69	10.2	2	cell organization and biogenesis;metabolic process	mitochondrion	protein binding;RNA binding	Pf00707, Pf05198	219402	ENSG00000122033.14	MTIF3	13			0	0.957	1.074	1.23	1.218	1.328	0.991281	0.9828	0.843993	0.462717	0.535858	16.01	7.92	40.52	4.45	8.04	85.4	97.2	101.6	115.7	7.69	40.94
FALSE	High	Master Protein	Q9P2K8	eIF-2-alpha kinase GCN2 OS=Homo sapiens OX=9606 GN=EIF2AK4 PE=1 SV=3	0	FALSE	10.276	2	3	5	3	1	1649	186.8	6.28	10.17	3	cell communication;cell growth;defense response;metabolic process;regulation of biological process;response to stimulus	cytoplasm;ribosome	catalytic activity;nucleotide binding;protein binding;RNA binding	Pf00069, Pf00587, Pf05773, Pf07714, Pf12745	440275	ENSG00000128829.11	EIF2AK4	15	Epstein-Barr virus infection; Protein processing in endoplasmic reticulum; Measles; Herpes simplex infection; Hepatitis C; Influenza A		0	0.831	0.848	1.148	1.217	1.019	0.873655	0.896823	0.970958	0.752259	0.997101	13.85	16.8	46.14	32.03	16.02	121.1	97.7	56.5	124.7	42.12	22.64
FALSE	High	Master Protein	Q8TBM8	DnaJ homolog subfamily B member 14 OS=Homo sapiens OX=9606 GN=DNAJB14 PE=1 SV=1	0	FALSE	8.439	7	2	3	2	1	379	42.5	8.59	6.46	2	cell organization and biogenesis;metabolic process	endoplasmic reticulum;membrane;nucleus	protein binding	Pf00226, Pf09320	79982	ENSG00000164031.16	DNAJB14	4			0	1.062	0.791	0.94	1.217	1.015	0.940172	0.806026	0.925198	0.745032	0.997101	7.36	9.64	34.22	26.3	15.26	99.6	107.6	91.6	101.2	3.43	39.5
FALSE	High	Master Protein	P02774	Vitamin D-binding protein OS=Homo sapiens OX=9606 GN=GC PE=1 SV=2	0	FALSE	11.386	8	2	4	2	1	474	52.9	5.45	13.68	2											0	0.596	1.023	2.088	1.217	1.245	0.0163593	0.999797	0.000496115	0.45881	0.619116	0	11.44	0	11.44	0	103.5	61.7	105.9	128.9
FALSE	High	Master Protein	O75521	Enoyl-CoA delta isomerase 2, mitochondrial OS=Homo sapiens OX=9606 GN=ECI2 PE=1 SV=4	0	FALSE	85.028	40	9	47	9	1	394	43.6	9	173.54	9	metabolic process	membrane;mitochondrion;organelle lumen	catalytic activity;protein binding	Pf00378, Pf00887	10455	ENSG00000198721.12	ECI2	6	Peroxisome; Fatty acid degradation		0	1.097	1.098	1.143	1.217	1.312	0.263154	0.928105	0.868284	0.0207894	0.0156737	62.22	48.31	46.48	39.06	36.12	83.6	120.1	84.9	111.4	34.84	55.83
FALSE	High	Master Protein	Q9BV38	WD repeat-containing protein 18 OS=Homo sapiens OX=9606 GN=WDR18 PE=1 SV=2	0	FALSE	22.517	13	5	15	5	1	432	47.4	6.7	32.77	5	development;metabolic process	cytoplasm;nucleus	protein binding	Pf00400, Pf14077	57418	ENSG00000065268.10	WDR18	19			0	0.917	0.942	1.171	1.217	1.153	0.967645	0.927513	0.911607	0.463224	0.82718	30.43	34.45	32.19	30.15	31.1	108.9	91.8	81.3	118	20.57	49.98
FALSE	High	Master Protein	Q70Z53	Protein FRA10AC1 OS=Homo sapiens OX=9606 GN=FRA10AC1 PE=1 SV=3	0.001	FALSE	6.508	5	1	3	1	1	315	37.5	8.1	12.04	1		nucleus	protein binding	Pf09725	118924	ENSG00000148690.11	FRA10AC1	10			0	0.987	0.863	1.064	1.217	1.049	0.98748	0.908555	0.999979	0.757674	0.99332	0	0	0	0	0	102.6	101.2	88.5	107.7
FALSE	High	Master Protein	Q01968	Inositol polyphosphate 5-phosphatase OCRL-1 OS=Homo sapiens OX=9606 GN=OCRL PE=1 SV=3	0.001	FALSE	7.547	2	2	5	2	1	901	104.1	6.55	11.37	2	cell organization and biogenesis;metabolic process;regulation of biological process;response to stimulus	cytoplasm;cytosol;endosome;Golgi;membrane;nucleus	catalytic activity;enzyme regulator activity;protein binding	Pf00620, Pf03372	4952	ENSG00000122126.15	OCRL	X	Phosphatidylinositol signaling system; Inositol phosphate metabolism; Metabolic pathways		0	1.106	0.912	1.071	1.216	1.204	0.886139	0.953754	0.999979	0.727034	0.887365	34.2	25.43	22.69	26.78	27.79	98.9	109.5	88.5	103.1	27.25	58.7
FALSE	High	None	Q96L21	60S ribosomal protein L10-like OS=Homo sapiens OX=9606 GN=RPL10L PE=1 SV=3	0	FALSE	21.558	14	3	47	3	1	214	24.5	10.01	132.72	3	cell organization and biogenesis;metabolic process	membrane;nucleus;ribosome	RNA binding;structural molecule activity	Pf00252	140801	ENSG00000165496.4	RPL10L	14	Ribosome		0	0.92	0.906	1.069	1.216	1.088	0.923575	0.753516	0.999979	0.0234781	0.914778	57.7	43.08	45.8	55.14	52.49	97.1	107.9	90.7	104.3	14.6	31.47
FALSE	High	Master Protein	Q16880	2-hydroxyacylsphingosine 1-beta-galactosyltransferase OS=Homo sapiens OX=9606 GN=UGT8 PE=2 SV=2	0	FALSE	40.113	21	8	34	8	1	541	61.4	9.52	111.03	8	cell organization and biogenesis;metabolic process	membrane	catalytic activity	Pf00201, Pf04101	7368	ENSG00000174607.10	UGT8	4	Ether lipid metabolism; Sphingolipid metabolism; Metabolic pathways		0	1.052	0.751	0.873	1.215	0.901	0.778482	0.0742145	0.277467	0.0986456	0.635673	25.13	18.33	27.6	25.65	23.87	99.3	117.4	85.2	98.1	5.79	7.48
FALSE	High	Master Protein	Q8TCA0	Leucine-rich repeat-containing protein 20 OS=Homo sapiens OX=9606 GN=LRRC20 PE=1 SV=1	0	FALSE	12.014	27	2	4	2	1	184	20.5	6.55	5.8	2			protein binding	Pf12799, Pf13855	55222	ENSG00000172731.13	LRRC20	10			0	1.703	1.959	1.417	1.215	2.543	0.117956	0.095569	0.734206	0.764296	0.00253515	62.93	48.61	10.68	28.13	45.31	59.9	65.7	159.3	115.1	80.87	47.34
FALSE	High	Master Protein	Q13112	Chromatin assembly factor 1 subunit B OS=Homo sapiens OX=9606 GN=CHAF1B PE=1 SV=1	0	FALSE	25.051	10	3	12	3	1	559	61.5	7.5	35.39	3	cell organization and biogenesis;metabolic process;regulation of biological process;response to stimulus	cytoplasm;cytosol;nucleus	protein binding	Pf00400, Pf08662, Pf15512	8208	ENSG00000159259.7	CHAF1B	21			0	0.98	0.909	1.096	1.215	1.102	0.993175	0.905165	0.995898	0.516321	0.968988	9.54	12.04	16.16	14.76	33.5	118.1	92	83	107	27.63	6.71
FALSE	High	Master Protein	Q07617	Sperm-associated antigen 1 OS=Homo sapiens OX=9606 GN=SPAG1 PE=1 SV=3	0.001	FALSE	7.033	3	1	1	1	1	926	103.6	6.86	3.26	1	cell organization and biogenesis	cytoplasm;cytosol	catalytic activity;nucleotide binding;protein binding	Pf00515, Pf13371, Pf13414, Pf13424, Pf13432, Pf13877	6674	ENSG00000104450.12	SPAG1	8			0	1.334	0.66	0.601	1.215	0.802	0.580555	0.716443	0.303686	0.822591	0.894214	16.22	28.14	14.6	54.62	24.3	105.4	140.6	69.6	84.5	16.1	6.61
FALSE	High	Master Protein	Q13322	Growth factor receptor-bound protein 10 OS=Homo sapiens OX=9606 GN=GRB10 PE=1 SV=2	0	FALSE	15.588	9	4	6	4	1	594	67.2	7.87	6.87	4	cellular component movement;regulation of biological process;response to stimulus	cytoplasm;cytosol;membrane	protein binding	Pf00017, Pf00169, Pf00788, Pf08947	2887	ENSG00000106070.17	GRB10	7	mTOR signaling pathway	VEGFA-VEGFR2 Signaling Pathway; EGF/EGFR Signaling Pathway; PI3K-AKT-mTOR signaling pathway and therapeutic opportunities; Insulin Signaling; Kit receptor signaling pathway	0	0.883	0.739	1.095	1.214	0.911	0.913785	0.508892	0.998862	0.60759	0.868741	26.54	11.88	46.6	29.97	28.64	91.8	130.5	65.3	112.4	38.13	47.06
FALSE	High	Master Protein	P04183	Thymidine kinase, cytosolic OS=Homo sapiens OX=9606 GN=TK1 PE=1 SV=2	0	FALSE	24.994	24	4	5	4	1	234	25.5	8.51	17.67	4	cell organization and biogenesis;metabolic process	cytoplasm;cytosol	catalytic activity;metal ion binding;nucleotide binding;protein binding	Pf00265	7083	ENSG00000167900.11	TK1	17	Metabolic pathways; Pyrimidine metabolism; Drug metabolism - other enzymes	Fluoropyrimidine Activity	0	0.919	0.915	1.224	1.212	1.109	0.943798	0.87405	0.672374	0.142056	0.948374	27.36	19.54	30.26	25.33	27.89	58.7	95.9	111.1	134.3	48.47	32.56
FALSE	High	Master Protein	O75312	Zinc finger protein ZPR1 OS=Homo sapiens OX=9606 GN=ZPR1 PE=1 SV=1	0	FALSE	22.223	14	4	9	4	1	459	50.9	4.73	24.57	4	cell death;cell differentiation;cell organization and biogenesis;cell proliferation;metabolic process;regulation of biological process;response to stimulus	cytoplasm;nucleus	metal ion binding;protein binding	Pf03367	8882	ENSG00000109917.10	ZNF259; ZPR1	11			0	1.029	0.936	1.142	1.212	1.238	0.957458	0.946325	0.964945	0.469439	0.680009	32.29	26.95	35.67	34.41	25.2	110	76.8	90.8	122.5	66.68	56.78
FALSE	High	Master Protein	Q8WTS1	1-acylglycerol-3-phosphate O-acyltransferase ABHD5 OS=Homo sapiens OX=9606 GN=ABHD5 PE=1 SV=1	0.001	FALSE	6.565	5	1	3	1	1	349	39.1	6.61	9.94	1	cell differentiation;metabolic process;regulation of biological process	cytoplasm;cytosol	catalytic activity	Pf00561, Pf12695, Pf12697	51099	ENSG00000011198.7	ABHD5	3	Regulation of lipolysis in adipocytes		0	0.87	1.128	1.112	1.211	1.366	0.957893	0.953754	0.998862	0.739406	0.625613	42.74	87.87	64.8	75.54	46.04	102.1	88.8	94.6	114.6	23.91	62.32
FALSE	Low	Master Protein	Q16854	Deoxyguanosine kinase, mitochondrial OS=Homo sapiens OX=9606 GN=DGUOK PE=1 SV=2	0.064	FALSE	1.679	9	1	1	1	1	277	32	8.66	0	1	metabolic process;regulation of biological process	cytoplasm;cytosol;mitochondrion;nucleus;organelle lumen	catalytic activity;nucleotide binding	Pf01712, Pf13238	1716	ENSG00000114956.19	DGUOK	2	Purine metabolism; Metabolic pathways		0	0.812	0.715	1.249	1.211	1.123	0.902251	0.649922	0.917634	0.8068	0.968988	40.44	37.08	31.81	44.15	62.9	98	84.6	98.3	119.1	72.34	27.81
FALSE	High	Master Protein	Q92673	Sortilin-related receptor OS=Homo sapiens OX=9606 GN=SORL1 PE=1 SV=2	0	FALSE	15.284	2	4	6	4	1	2214	248.3	5.55	5.14	4	metabolic process;regulation of biological process;response to stimulus;transport	endoplasmic reticulum;endosome;extracellular;Golgi;membrane	protein binding;receptor activity;signal transducer activity	Pf00041, Pf00057, Pf00058, Pf12999	6653	ENSG00000137642.12	SORL1	11			0	1.212	0.9	1.01	1.211	1.225	0.589342	0.906212	0.974105	0.707551	0.838369	64.72	47.77	36.88	23.1	41.98	98.8	137.1	87.1	77	48.68	52.9
FALSE	High	Master Protein	O15357	Phosphatidylinositol 3,4,5-trisphosphate 5-phosphatase 2 OS=Homo sapiens OX=9606 GN=INPPL1 PE=1 SV=2	0	FALSE	30.895	6	5	18	5	1	1258	138.5	6.54	47.23	5	cell organization and biogenesis;metabolic process;regulation of biological process;response to stimulus;transport	cytoplasm;cytoskeleton;cytosol;Golgi;membrane	catalytic activity;protein binding	Pf00017, Pf00536, Pf03372, Pf07647	3636	ENSG00000165458.13	INPPL1	11	Insulin signaling pathway; B cell receptor signaling pathway; Phosphatidylinositol signaling system; Inositol phosphate metabolism; Fc gamma R-mediated phagocytosis	EGF/EGFR Signaling Pathway; Insulin Signaling	0	1.049	1.08	1.214	1.21	1.298	0.874948	0.962994	0.795444	0.372521	0.264052	55.85	40.07	40.81	41.99	37.06	84.7	97.6	89.5	128.2	24.94	35.13
FALSE	High	Master Protein	Q9NY93	Probable ATP-dependent RNA helicase DDX56 OS=Homo sapiens OX=9606 GN=DDX56 PE=1 SV=1	0	FALSE	10.442	5	2	6	2	1	547	61.6	9.26	17.2	2	metabolic process;regulation of biological process	cytoplasm;membrane;nucleus	catalytic activity;DNA binding;nucleotide binding;RNA binding	Pf00270, Pf00271, Pf04851	54606	ENSG00000136271.10	DDX56	7			0	0.864	0.649	0.836	1.21	0.791	0.883992	0.0795361	0.591204	0.619719	0.292992	31.39	22.44	9.53	26.72	15.28	171.2	86.3	70.8	71.7	77.89	47.79
FALSE	High	Master Protein	Q969H6	Ribonuclease P/MRP protein subunit POP5 OS=Homo sapiens OX=9606 GN=POP5 PE=1 SV=1	0.001	FALSE	5.643	7	1	3	1	1	163	18.8	7.27	6.41	1	metabolic process;transport	nucleus	catalytic activity;protein binding;transporter activity	Pf00999	51367	ENSG00000167272.10	POP5	12	Ribosome biogenesis in eukaryotes; RNA transport		0	0.967	0.836	1.045	1.209	1.011	0.991136	0.693024	0.998862	0.490042	0.99332	0	15.48	0	22.14	0	104.9	101.4	87.7	106
FALSE	Medium	None	Q14088	Ras-related protein Rab-33A OS=Homo sapiens OX=9606 GN=RAB33A PE=1 SV=2	0.027	FALSE	2.43	5	1	2	1	1	237	26.6	7.88	1.94	1	regulation of biological process;response to stimulus	membrane	catalytic activity;nucleotide binding;protein binding;signal transducer activity	Pf00025, Pf00071, Pf00503, Pf00735, Pf01926, Pf04670, Pf08477	9363	ENSG00000134594.4	RAB33A	X			0	1.007	0.786	0.907	1.209	0.95	0.983411	0.891593	0.917634	0.856719	0.979322	15.72	2.87	20.02	14.43	18.17	108.6	102.9	85.3	103.2	8.24	13.85
FALSE	High	Master Protein	Q9H082	Ras-related protein Rab-33B OS=Homo sapiens OX=9606 GN=RAB33B PE=1 SV=1	0	FALSE	8.55	10	2	20	1	1	229	25.7	7.18	53.53	2	cell organization and biogenesis;metabolic process;regulation of biological process;response to stimulus;transport	Golgi;membrane;organelle lumen	catalytic activity;nucleotide binding;protein binding;signal transducer activity	Pf00025, Pf00071, Pf00503, Pf01926, Pf04670, Pf08477	83452	ENSG00000172007.5	RAB33B	4			0	1.007	0.786	0.907	1.209	0.95	0.983411	0.891593	0.917634	0.856719	0.979322	15.72	2.87	20.02	14.43	18.17	108.6	102.9	85.3	103.2	8.24	13.85
TRUE	High	Master Protein	Q03001	Dystonin OS=Homo sapiens OX=9606 GN=DST PE=1 SV=4	0.001	FALSE	6.741	1	3	10	2	1	7570	860.1	5.25	5.6	3	cell organization and biogenesis;cellular component movement;regulation of biological process;response to stimulus;transport	cytoplasm;cytoskeleton;cytosol;endoplasmic reticulum;membrane;nucleus	metal ion binding;protein binding	Pf00307, Pf00435, Pf00681, Pf02187, Pf11971, Pf13499, Pf13833	667		DST	6			0	0.293	0.189	0.78	1.208	0.229	1.08274e-05	1.25776e-06	0.743662	0.848651	1.71679e-06	16.63	0	55.76	121.26	6.34	233.8	68.5	44.2	53.5		112.24
FALSE	Medium	None	Q9NYU1	UDP-glucose:glycoprotein glucosyltransferase 2 OS=Homo sapiens OX=9606 GN=UGGT2 PE=1 SV=4	0.012	FALSE	3.001	1	1	6	1	1	1516	174.6	6.89	14.08	1	metabolic process;regulation of biological process;response to stimulus	endoplasmic reticulum;organelle lumen	catalytic activity;protein binding	Pf01501, Pf06427	55757	ENSG00000102595.19	UGGT2	13	Protein processing in endoplasmic reticulum		0	0.833	0.829	1.16	1.208	0.966	0.819147	0.764007	0.946598	0.579693	0.948374	11.4	7.34	4.77	11.25	11.09	111.5	92.9	87.9	107.7	11.61	2.13
FALSE	High	Master Protein	Q96ER3	Protein SAAL1 OS=Homo sapiens OX=9606 GN=SAAL1 PE=1 SV=2	0	FALSE	40.193	21	6	22	6	1	474	53.5	4.5	49.68	6		nucleus			113174	ENSG00000166788.9	SAAL1	11			0	1.067	1.031	1.2	1.208	1.109	0.823401	0.999797	0.807306	0.30708	0.948374	28.51	38.46	31.36	36.39	32.28	105.7	102.7	87.3	104.3	33.75	39.51
FALSE	High	Master Protein	P11274	Breakpoint cluster region protein OS=Homo sapiens OX=9606 GN=BCR PE=1 SV=2	0	FALSE	27.38	5	4	13	3	1	1271	142.7	7.03	39.12	4	cell organization and biogenesis;metabolic process;regulation of biological process;response to stimulus;transport	cytoplasm;cytosol;membrane	catalytic activity;enzyme regulator activity;nucleotide binding;protein binding	Pf00168, Pf00620, Pf00621, Pf04733, Pf09036	613	ENSG00000186716.20	BCR	22	Chronic myeloid leukemia; Pathways in cancer	Imatinib and Chronic Myeloid Leukemia	0	0.984	0.855	0.99	1.208	1.015	0.991281	0.906212	0.966523	0.631148	0.992073	34.33	9.21	34.83	18.72	24.28	93	109.6	71.7	125.7	52.96	33.12
FALSE	High	Master Protein	Q9UNW1	Multiple inositol polyphosphate phosphatase 1 OS=Homo sapiens OX=9606 GN=MINPP1 PE=1 SV=1	0	FALSE	94.408	36	9	54	9	1	487	55	7.81	170.94	9	metabolic process	endoplasmic reticulum;organelle lumen	catalytic activity	Pf00328	9562	ENSG00000107789.15	MINPP1	10	Inositol phosphate metabolism; Glycolysis / Gluconeogenesis; Metabolic pathways		0	1.008	0.974	1.058	1.207	1.021	0.925041	0.945903	0.998862	0.135103	0.996231	27.76	31.18	27.78	29.44	30.69	102.4	108.3	82.3	106.9	19.6	17.99
FALSE	High	Master Protein	P80303	Nucleobindin-2 OS=Homo sapiens OX=9606 GN=NUCB2 PE=1 SV=3	0	FALSE	41.304	22	6	18	6	1	420	50.2	5.12	60.5	6		cytoplasm;cytosol;endoplasmic reticulum;Golgi;membrane;nucleus	DNA binding;metal ion binding;protein binding	Pf13499	4925	ENSG00000070081.15	NUCB2	11			0	1.066	1.105	1.807	1.207	2.032	0.843042	0.953754	0.00496939	0.596234	3.151e-06	110.15	95.39	108.97	104.79	104.02	118.5	145.1	37.7	98.7	99.98	103.83
FALSE	High	Master Protein	Q96BJ3	Axin interactor, dorsalization-associated protein OS=Homo sapiens OX=9606 GN=AIDA PE=1 SV=1	0	FALSE	19.748	14	3	7	3	1	306	35	6.55	19.35	3	development;regulation of biological process	cytoplasm;membrane	protein binding	Pf08910, Pf14186	64853	ENSG00000186063.12	AIDA	1			0	1.094	1.391	1.195	1.207	1.438	0.801608	0.315125	0.85759	0.482389	0.0723572	81.1	67.95	49.5	53.77	86.9	103.2	102.3	101	93.5	25.54	9.67
FALSE	High	Master Protein	P46926	Glucosamine-6-phosphate isomerase 1 OS=Homo sapiens OX=9606 GN=GNPDA1 PE=1 SV=1	0	FALSE	117.159	73	15	88	10	1	289	32.6	6.92	298.09	15	metabolic process	cytoplasm;cytosol	catalytic activity;protein binding	Pf01182	10007	ENSG00000113552.15	GNPDA1	5	Amino sugar and nucleotide sugar metabolism; Metabolic pathways		5	0.943	0.828	1.007	1.207	0.965	0.987056	0.248518	0.882194	0.00231516	0.932336	35.15	29.04	38.78	39.76	37.88	103.6	108.7	78.6	109.2	8.72	10.89
FALSE	High	Master Protein	Q9UKB1	F-box/WD repeat-containing protein 11 OS=Homo sapiens OX=9606 GN=FBXW11 PE=1 SV=1	0	FALSE	11.114	8	2	6	2	1	542	62.1	7.12	9.25	2	metabolic process;regulation of biological process;response to stimulus	cytoplasm;cytosol;nucleus	catalytic activity;protein binding	Pf00400, Pf00646, Pf08801, Pf12125, Pf12937	23291	ENSG00000072803.17	FBXW11	5	Ubiquitin mediated proteolysis; Hippo signaling pathway; Wnt signaling pathway; Oocyte meiosis; Hedgehog signaling pathway; Circadian rhythm; Shigellosis	TNF alpha Signaling Pathway; VEGFA-VEGFR2 Signaling Pathway	0	0.812	0.736	1.067	1.206	0.888	0.898182	0.750253	0.999979	0.818838	0.935752	45.48	70.23	83.98	97	51.81	106.1	109.7	78.1	106.1	35.3	94.68
FALSE	High	Master Protein	P40425	Pre-B-cell leukemia transcription factor 2 OS=Homo sapiens OX=9606 GN=PBX2 PE=1 SV=2	0.001	FALSE	5.822	6	1	5	1	1	430	45.9	7.56	8.29	1	metabolic process;regulation of biological process	nucleus	DNA binding;protein binding	Pf00046, Pf03792, Pf05920	5089	ENSG00000232005.7; ENSG00000236353.7; ENSG00000206315.9; ENSG00000237344.7; ENSG00000224952.7; ENSG00000225987.7; ENSG00000204304.11	PBX2	6; CHR_HSCHR6_MHC_MANN_CTG1; CHR_HSCHR6_MHC_MCF_CTG1; CHR_HSCHR6_MHC_QBL_CTG1; CHR_HSCHR6_MHC_COX_CTG1; CHR_HSCHR6_MHC_SSTO_CTG1; CHR_HSCHR6_MHC_APD_CTG1			0	0.829	1.118	1.626	1.206	1.348	0.929766	0.976858	0.575825	0.854097	0.838735	14.83	25.8	18.83	31.23	0	93.1	77.2	104.1	125.6		39.87
FALSE	High	Master Protein	Q9UHV9	Prefoldin subunit 2 OS=Homo sapiens OX=9606 GN=PFDN2 PE=1 SV=1	0	FALSE	37.556	32	4	43	4	1	154	16.6	6.58	128.14	4	metabolic process;regulation of biological process	cytoplasm;cytosol;mitochondrion;nucleus	protein binding	Pf01920	5202	ENSG00000143256.4	PFDN2	1			0	0.991	0.933	1.063	1.205	1.074	0.891434	0.850417	0.999979	0.010204	0.921429	44.7	55.11	69.01	61.32	73.76	93.1	90.5	106.3	110.1	11.16	14.4
FALSE	High	Master Protein	Q96G46	tRNA-dihydrouridine(47) synthase [NAD(P)(+)]-like OS=Homo sapiens OX=9606 GN=DUS3L PE=1 SV=2	0.001	FALSE	6.396	2	1	3	1	1	650	72.5	8.05	6.98	1	metabolic process		catalytic activity;metal ion binding;nucleotide binding;RNA binding	Pf01207	56931	ENSG00000141994.15	DUS3L	19			0	0.627	0.618	1.186	1.205	0.744	0.404408	0.298251	0.972282	0.812195	0.619116	0	0	0	0	0	133.8	83.9	82.6	99.6
FALSE	High	Master Protein	Q9UL33	Trafficking protein particle complex subunit 2-like protein OS=Homo sapiens OX=9606 GN=TRAPPC2L PE=1 SV=1	0.001	FALSE	6.393	14	1	1	1	1	140	16.1	6.77	2.52	1	cell organization and biogenesis;transport	cytoplasm;cytosol;endoplasmic reticulum;Golgi;membrane	protein binding	Pf04099, Pf04628	51693	ENSG00000167515.10	TRAPPC2L	16			0	0.635	0.719	1.364	1.204	0.866	0.373582	0.609216	0.782696	0.827766	0.887001	0	0	0	0	0	124.2	78.9	89.3	107.6
FALSE	High	Master Protein	P27361	Mitogen-activated protein kinase 3 OS=Homo sapiens OX=9606 GN=MAPK3 PE=1 SV=4	0	FALSE	121.042	56	17	76	10	1	379	43.1	6.74	213.3	17	cell communication;cell death;cell differentiation;cell organization and biogenesis;cellular component movement;cellular homeostasis;metabolic process;regulation of biological process;response to stimulus;transport	cytoplasm;cytoskeleton;cytosol;endosome;Golgi;membrane;mitochondrion;nucleus	catalytic activity;nucleotide binding;protein binding;signal transducer activity	Pf00069, Pf01636, Pf07714	5595	ENSG00000102882.11	MAPK3	16	Viral carcinogenesis; Chagas disease (American trypanosomiasis); Serotonergic synapse; Th1 and Th2 cell differentiation; TGF-beta signaling pathway; T cell receptor signaling pathway; Dorso-ventral axis formation; TNF signaling pathway; NOD-like receptor signaling pathway; Osteoclast differentiation; Prion diseases; Vascular smooth muscle contraction; Glutamatergic synapse; Hepatitis B; Insulin s…	IL-4 Signaling Pathway; Rac1/Pak1/p38/MMP-2 pathway; Prolactin Signaling Pathway; IL-6 signaling pathway; Common Pathways Underlying Drug Addiction; Follicle Stimulating Hormone (FSH) signaling pathway; Kit receptor signaling pathway; Signaling Pathways in Glioblastoma; Human Thyroid Stimulating Hormone (TSH) signaling pathway; Alpha 6 Beta 4 signaling pathway; Angiopoietin Like Protein 8 Regulat…	0	1.024	0.795	0.901	1.204	0.912	0.877965	0.237974	0.478377	0.183712	0.80078	33.29	32.8	44.18	54.29	41.93	109.4	114.8	97.3	78.5	22.89	3.24
FALSE	High	None	Q6DKI2	Galectin-9C OS=Homo sapiens OX=9606 GN=LGALS9C PE=1 SV=2	0	FALSE	7.622	7	2	5	2	1	356	39.6	9.19	8.94	2		cytosol	protein binding	Pf00337	654346	ENSG00000171916.16; ENSG00000284021.1	LGALS9C	17; CHR_HSCHR17_3_CTG1		TYROBP Causal Network	0	1.565	1.37	1.072	1.204	1.721	0.0193812	0.637677	0.998871	0.500287	0.00818567	31.36	20.76	58.41	22.5	60.76	72.5	96.8	102.8	127.8	65.55	31.28
FALSE	High	None	Q3B8N2	Galectin-9B OS=Homo sapiens OX=9606 GN=LGALS9B PE=1 SV=3	0	FALSE	7.622	7	2	5	2	1	356	39.6	9.52	8.94	2		cytosol	protein binding	Pf00337	284194	ENSG00000170298.15	LGALS9B	17			0	1.565	1.37	1.072	1.204	1.721	0.0193812	0.637677	0.998871	0.500287	0.00818567	31.36	20.76	58.41	22.5	60.76	72.5	96.8	102.8	127.8	65.55	31.28
FALSE	High	Master Protein	O14972	Down syndrome critical region protein 3 OS=Homo sapiens OX=9606 GN=DSCR3 PE=2 SV=1	0.001	FALSE	7.276	4	1	3	1	1	297	33	7.68	8.76	1	transport	endosome;nucleus	transporter activity	Pf00339, Pf03643	10311	ENSG00000157538.13	DSCR3	21			0	1.132	1.162	1.234	1.203	1.397	0.880717	0.932136	0.920526	0.830811	0.706654	18.33	17.56	20.69	17.77	19.58	85.3	96.5	99.1	119.1	18.74	19.78
FALSE	High	Master Protein	O43570	Carbonic anhydrase 12 OS=Homo sapiens OX=9606 GN=CA12 PE=1 SV=1	0	FALSE	68.006	26	5	36	5	1	354	39.4	7.23	160.18	5	metabolic process;transport	membrane	catalytic activity;metal ion binding	Pf00194	771	ENSG00000074410.13	CA12	15	Nitrogen metabolism		0	1.258	1.23	1.22	1.202	1.574	0.0304134	0.622991	0.675188	0.13458	0.000211583	40.32	58.91	48.78	23.1	39.3	71.3	109.4	89.9	129.4	72.56	16.46
FALSE	Low	Master Protein	Q5TBA9	Protein furry homolog OS=Homo sapiens OX=9606 GN=FRY PE=1 SV=1	0.121	FALSE	1.199	0	1	1	1	1	3013	338.7	5.99	0	1	cell organization and biogenesis;regulation of biological process	cytoplasm;cytoskeleton	enzyme regulator activity	Pf14222, Pf14225, Pf14228	10129	ENSG00000073910.19	FRY	13			0	1.033	0.972	1.001	1.201	1.146	0.973652	0.989567	0.978447	0.872318	0.961714	34.77	24.2	23.94	18.6	17.82	89.9	114.6	88.8	106.6	18.19	21.27
FALSE	High	Master Protein	Q9H857	5'-nucleotidase domain-containing protein 2 OS=Homo sapiens OX=9606 GN=NT5DC2 PE=1 SV=1	0	FALSE	88.08	34	10	56	10	1	520	60.7	6.77	215.04	10	metabolic process		catalytic activity;metal ion binding;receptor activity;signal transducer activity	Pf05761	64943	ENSG00000168268.10	NT5DC2	3			0	1.089	0.955	1.07	1.2	1.141	0.360425	0.91416	0.999979	0.150457	0.758051	68.22	56.31	56.65	56.37	50.95	97.2	124.4	85.1	93.2	43.92	68.36
FALSE	High	Master Protein	Q9BU23	Lipase maturation factor 2 OS=Homo sapiens OX=9606 GN=LMF2 PE=1 SV=2	0	FALSE	17.329	8	3	4	3	1	707	79.6	10.1	8.87	3	metabolic process	endoplasmic reticulum;membrane	protein binding	Pf06762	91289	ENSG00000100258.17	LMF2	22			0	0.989	1.203	1.344	1.2	1.62	0.987056	0.953754	0.62573	0.84318	0.351922	35.8	28.81	15.97	27.61	30.2	57.2	162.1	21	159.6	115.53
FALSE	High	Master Protein	Q9BXS6	Nucleolar and spindle-associated protein 1 OS=Homo sapiens OX=9606 GN=NUSAP1 PE=1 SV=1	0.004	FALSE	4.125	3	1	2	1	1	441	49.4	9.91	4.86	1	cell division;cell organization and biogenesis;metabolic process;regulation of biological process	chromosome;cytoplasm;cytoskeleton;nucleus	DNA binding;protein binding;RNA binding		51203	ENSG00000137804.12	NUSAP1	15			0	0.771	0.905	1.316	1.199	0.934	0.805232	0.953754	0.782696	0.772137	0.961714	19.85	31.42	39.23	53.7	39.66	110.9	85.5	106.9	96.7	26.06	37.08
FALSE	High	Master Protein	P15586	N-acetylglucosamine-6-sulfatase OS=Homo sapiens OX=9606 GN=GNS PE=1 SV=3	0	FALSE	62.181	22	9	61	9	1	552	62	8.31	176.01	9	metabolic process;transport	extracellular;organelle lumen;vacuole	catalytic activity;metal ion binding;protein binding	Pf00884, Pf01663	2799	ENSG00000135677.10	GNS	12	Lysosome; Glycosaminoglycan degradation; Metabolic pathways		0	1.089	1	1.102	1.199	1.154	0.296187	0.974896	0.969364	0.0617258	0.593955	38.38	33.25	42.2	32.19	36.72	92.9	101.6	88.5	117	25.17	15.89
FALSE	High	Master Protein	Q6IQ23	Pleckstrin homology domain-containing family A member 7 OS=Homo sapiens OX=9606 GN=PLEKHA7 PE=1 SV=2	0.009	FALSE	3.314	1	1	2	1	1	1121	127.1	9.35	4.06	1	cell organization and biogenesis;metabolic process	cytoplasm;cytoskeleton;cytosol;nucleus	catalytic activity;motor activity;protein binding	Pf00169, Pf00397, Pf01576, Pf01920, Pf02463, Pf03961, Pf07798, Pf14992, Pf15409, Pf15413	144100	ENSG00000166689.15	PLEKHA7	11			0	1.266	1.072	1.015	1.199	1.285	0.67199	0.978632	0.989858	0.780397	0.845344	48.32	43.88	32.73	29.72	38.81	86.5	109.5	92.8	111.2	43.82
FALSE	High	Master Protein	Q9BY43	Charged multivesicular body protein 4a OS=Homo sapiens OX=9606 GN=CHMP4A PE=1 SV=3	0	FALSE	21.033	15	2	14	2	1	222	25.1	4.7	68.58	2	cell communication;cell organization and biogenesis;metabolic process;regulation of biological process;response to stimulus;transport	cytoplasm;cytosol;endosome;membrane;nucleus	protein binding	Pf03357	29082	ENSG00000254505.9	CHMP4A	14	Endocytosis		0	1.005	0.859	1.029	1.199	1.03	0.976316	0.833594	0.992726	0.571046	0.996231	13.82	23.87	9.78	28.58	15.46	99.6	96	113.9	90.4	77.73	91.12
FALSE	High	Master Protein	Q86WA6	Valacyclovir hydrolase OS=Homo sapiens OX=9606 GN=BPHL PE=1 SV=1	0	FALSE	11.815	11	2	5	2	1	291	32.5	9.14	19.1	2	metabolic process;response to stimulus	membrane;mitochondrion	catalytic activity	Pf00561, Pf01738, Pf12695, Pf12697	670	ENSG00000137274.12	BPHL	6			0	1.524	2.271	1.44	1.198	1.703	0.0354225	0.00117707	0.358938	0.583788	0.0275459	91.29	53.1	77.05	22.41	41.06	65.6	85.3	113	136	69.4	51.07
FALSE	High	Master Protein Candidate	P11388	DNA topoisomerase 2-alpha OS=Homo sapiens OX=9606 GN=TOP2A PE=1 SV=3	0	FALSE	8.361	1	1	2	1	1	1531	174.3	8.72	4.96	1	cell differentiation;cell division;cell organization and biogenesis;metabolic process;regulation of biological process;response to stimulus	chromosome;cytoplasm;nucleus	catalytic activity;DNA binding;metal ion binding;nucleotide binding;protein binding;RNA binding	Pf00204, Pf00521, Pf01751, Pf02518, Pf08070	7153	ENSG00000131747.14	TOP2A	17	Platinum drug resistance	Gastric Cancer Network 1; Gastric cancer network 2; Retinoblastoma (RB) in Cancer	0	0.01	2.645	100	1.198	3.169	4.49643e-16	0.00042938	4.24865e-16	0.60759	5.78081e-10		129.64		0	129.64	58.7		155.3	186	93.09
FALSE	High	Master Protein	Q02880	DNA topoisomerase 2-beta OS=Homo sapiens OX=9606 GN=TOP2B PE=1 SV=3	0	FALSE	8.361	1	1	2	1	1	1626	183.2	8	4.96	1	cell organization and biogenesis;cellular component movement;metabolic process;regulation of biological process	cytoplasm;cytosol;nucleus	catalytic activity;DNA binding;metal ion binding;nucleotide binding;protein binding	Pf00204, Pf00521, Pf01751, Pf02518, Pf08070, Pf13589	7155	ENSG00000077097.15	TOP2B	3	Platinum drug resistance		0	0.01	2.645	100	1.198	3.169	4.49643e-16	0.00042938	4.24865e-16	0.60759	5.78081e-10		129.64		0	129.64	58.7		155.3	186	93.09
FALSE	High	Master Protein	Q96EP0	E3 ubiquitin-protein ligase RNF31 OS=Homo sapiens OX=9606 GN=RNF31 PE=1 SV=1	0	FALSE	33.215	11	5	10	5	1	1072	119.6	6.57	19.27	5	metabolic process;regulation of biological process;response to stimulus	cytoplasm;cytosol	catalytic activity;metal ion binding;protein binding	Pf01485, Pf09409	55072	ENSG00000092098.16	RNF31	14	NOD-like receptor signaling pathway	Regulation of toll-like receptor signaling pathway	0	0.97	0.833	1.226	1.198	1.016	0.999984	0.795535	0.864938	0.646386	0.991755	57.59	44.79	40.54	58.34	49.08	98.6	143.8	53.4	104.2	72.76	25.61
FALSE	Medium	None	P51530	DNA replication ATP-dependent helicase/nuclease DNA2 OS=Homo sapiens OX=9606 GN=DNA2 PE=1 SV=3	0.023	FALSE	2.546	1	1	1	1	1	1060	120.3	7.74	1.7	1	cell organization and biogenesis;cellular homeostasis;metabolic process;regulation of biological process;response to stimulus	mitochondrion;nucleus	catalytic activity;DNA binding;metal ion binding;nucleotide binding;protein binding	Pf08696, Pf13086, Pf13087, Pf13245, Pf13604	1763	ENSG00000138346.14	DNA2	10	DNA replication		0	0.659	0.834	1.352	1.197	0.95	0.65567	0.926666	0.920268	0.841071	0.987452	20.08	23.08	61.28	41.44	42.97	115	68.9	98.4	117.8	35.5	45.86
FALSE	High	Master Protein	Q9UBN7	Histone deacetylase 6 OS=Homo sapiens OX=9606 GN=HDAC6 PE=1 SV=2	0	FALSE	24.051	6	3	7	3	1	1215	131.3	5.3	15.17	3	cell growth;cell organization and biogenesis;cellular component movement;metabolic process;regulation of biological process;response to stimulus;transport	cytoplasm;cytosol;endosome;membrane;nucleus	catalytic activity;DNA binding;metal ion binding;protein binding;transporter activity	Pf00850, Pf02148, Pf09595	10013	ENSG00000094631.18	HDAC6	X	Viral carcinogenesis; Alcoholism	Neural Crest Differentiation; Ectoderm Differentiation; Cell Cycle	0	0.732	1.007	1.88	1.197	1.49	0.810736	0.999797	0.0557322	0.784339	0.46847	27.76	31.75	58.48	45.04	52.43	81.3	83.2	83.4	152.1	89.83	48.89
FALSE	High	Master Protein	P17066	Heat shock 70 kDa protein 6 OS=Homo sapiens OX=9606 GN=HSPA6 PE=1 SV=2	0	FALSE	95.351	19	11	201	1	1	643	71	6.14	556.38	11	cell organization and biogenesis;metabolic process;response to stimulus;transport	cytoplasm;cytosol;extracellular;organelle lumen	catalytic activity;nucleotide binding;protein binding	Pf00012, Pf06723	3310	ENSG00000173110.7	HSPA6	1	Endocytosis; Longevity regulating pathway - multiple species; Epstein-Barr virus infection; Spliceosome; MAPK signaling pathway; Protein processing in endoplasmic reticulum; Toxoplasmosis; Measles; Influenza A; Estrogen signaling pathway; Legionellosis; Antigen processing and presentation	Parkin-Ubiquitin Proteasomal System pathway	0	1.135	0.912	0.939	1.197	1.091	0.748775	0.91416	0.864528	0.538448	0.985733	49.86	55.72	39.39	67.91	41	84.8	109.4	112.3	93.5	46.68	33.91
FALSE	High	Master Protein	Q9Y5X2	Sorting nexin-8 OS=Homo sapiens OX=9606 GN=SNX8 PE=1 SV=1	0	FALSE	25.666	16	5	15	5	1	465	52.5	7.39	38.59	5	cell organization and biogenesis;transport	cytosol;endosome;membrane	protein binding	Pf00787	29886	ENSG00000106266.10	SNX8	7			0	0.972	0.873	1.164	1.197	1.032	0.997161	0.743187	0.878374	0.390901	0.999858	40.46	27.77	31.89	29.16	21.8	107.4	92.7	80.8	119.1	5.56	12.97
FALSE	High	Master Protein	Q13608	Peroxisome assembly factor 2 OS=Homo sapiens OX=9606 GN=PEX6 PE=1 SV=2	0	FALSE	13.751	8	3	4	3	1	980	104	6.34	7.68	3	cell organization and biogenesis;regulation of biological process;transport	cytoplasm;cytosol;membrane	catalytic activity;nucleotide binding;protein binding;RNA binding	Pf00004, Pf00910, Pf05729, Pf07724, Pf13086, Pf13191, Pf13207, Pf13245	5190	ENSG00000124587.13	PEX6	6	Peroxisome		0	0.882	1.13	1.297	1.197	0.988	0.94657	0.962746	0.87452	0.796295	0.992073	54.34	82.67	59.85	80.09	88.59	128.5	63.3	126.9	81.3	65.85	67.46
FALSE	High	Master Protein	Q5TA45	Integrator complex subunit 11 OS=Homo sapiens OX=9606 GN=INTS11 PE=1 SV=2	0.001	FALSE	7.502	4	2	4	2	1	600	67.6	8.06	7.16	2	metabolic process	cytoplasm;cytosol;nucleus	catalytic activity;protein binding	Pf00753, Pf07521, Pf10996, Pf12706	54973	ENSG00000127054.20	CPSF3L; INTS11	1			0	0.885	0.925	1.087	1.197	1.052	0.92378	0.909091	0.998862	0.607987	0.999677	13.72	13.45	28.74	25.67	17.47	123.3	63.8	103.5	109.4	2.87	26.81
FALSE	High	Master Protein	Q8NC42	E3 ubiquitin-protein ligase RNF149 OS=Homo sapiens OX=9606 GN=RNF149 PE=2 SV=2	0.001	FALSE	6.635	6	2	2	2	1	400	43.1	6.54	4.97	2	metabolic process;regulation of biological process;response to stimulus	membrane	catalytic activity;metal ion binding;protein binding	Pf00097, Pf02225, Pf12678, Pf13639, Pf13920, Pf13923, Pf14634	284996	ENSG00000163162.8	RNF149	2			0	0.799	0.688	1.029	1.197	0.823	0.8668	0.560864	0.998862	0.830068	0.808255	15.25	11.31	25.89	20.28	13.17	117.3	93.8	91.4	97.5	30.37	38.22
FALSE	Medium	None	P53804	E3 ubiquitin-protein ligase TTC3 OS=Homo sapiens OX=9606 GN=TTC3 PE=1 SV=2	0.041	FALSE	2.052	0	1	2	0	2	2025	229.7	7.52	0	1	metabolic process	cytosol;nucleus	catalytic activity;metal ion binding;protein binding	Pf00097, Pf12678, Pf13414, Pf13424, Pf13431, Pf13639, Pf13923, Pf14634	7267	ENSG00000182670.13	TTC3	21			0	0.74	0.897	1.111	1.196	0.85	0.867507	0.955917	0.999979	0.864275	0.950085	41.83	99.49	18.75	91.45	36.86	94.4	69.9	155.4	80.2	110.73	129.7
FALSE	Medium	None	Q86VV8	Rotatin OS=Homo sapiens OX=9606 GN=RTTN PE=1 SV=3	0.041	FALSE	2.052	0	1	2	0	2	2226	248.5	6.7	0	1	cell organization and biogenesis;development	cytoplasm;cytoskeleton		Pf14726	25914	ENSG00000176225.13	RTTN	18			0	0.74	0.897	1.111	1.196	0.85	0.867507	0.955917	0.999979	0.864275	0.950085	41.83	99.49	18.75	91.45	36.86	94.4	69.9	155.4	80.2	110.73	129.7
FALSE	High	Master Protein	P07108	Acyl-CoA-binding protein OS=Homo sapiens OX=9606 GN=DBI PE=1 SV=2	0	FALSE	27.273	51	3	36	3	1	87	10	6.57	129.86	3	metabolic process;transport	endoplasmic reticulum;Golgi;organelle lumen	protein binding	Pf00887	1622	ENSG00000155368.16	DBI	2	PPAR signaling pathway	PPAR signaling pathway; Sterol Regulatory Element-Binding Proteins (SREBP) signalling; PPAR Alpha Pathway	0	1.177	1.036	1.447	1.196	1.314	0.100592	0.998828	0.0209066	0.164257	0.0623129	56.15	89.71	64.07	89.3	57.17	91.3	124	64.1	120.5	48.72	45.73
FALSE	High	Master Protein	Q8N2G8	GH3 domain-containing protein OS=Homo sapiens OX=9606 GN=GHDC PE=1 SV=2	0	FALSE	10.762	5	3	15	3	1	530	57.5	7.88	31.83	3	transport	endoplasmic reticulum;extracellular;membrane;nucleus;organelle lumen		Pf03321	84514	ENSG00000167925.15	GHDC	17			0	1.081	0.94	1.044	1.196	1.128	0.867507	0.948402	0.998862	0.508198	0.961714	25.94	27.87	24.33	38.63	30.11	91.3	96.4	103.8	108.5	10.1	17.62
FALSE	High	Master Protein	Q9Y6A9	Signal peptidase complex subunit 1 OS=Homo sapiens OX=9606 GN=SPCS1 PE=1 SV=4	0	FALSE	25.72	31	2	23	2	1	102	11.8	9.31	87.38	2	metabolic process;transport	endoplasmic reticulum;membrane	catalytic activity;protein binding	Pf06645	28972	ENSG00000114902.13	SPCS1	3	Protein export		0	0.869	0.78	1.152	1.195	0.969	0.812719	0.202429	0.899413	0.195647	0.93579	43.13	68.83	48.12	119.21	52.8	135.2	95.7	44.5	124.6	29.66	40.6
FALSE	High	Master Protein	Q86Y39	NADH dehydrogenase [ubiquinone] 1 alpha subcomplex subunit 11 OS=Homo sapiens OX=9606 GN=NDUFA11 PE=1 SV=3	0	FALSE	17.132	35	3	18	3	1	141	14.8	8.72	51.81	3	cell organization and biogenesis;metabolic process;transport	membrane;mitochondrion	catalytic activity		126328	ENSG00000174886.12	NDUFA11	19	Huntington's disease; Parkinson's disease; Alzheimer's disease; Oxidative phosphorylation; Non-alcoholic fatty liver disease (NAFLD); Metabolic pathways	Oxidative phosphorylation	0	0.883	0.921	1.29	1.195	1.135	0.857984	0.876465	0.410326	0.228974	0.887365	17.06	30.83	22.22	33.15	10.42	109.2	86.1	111.4	93.3	27.77	13.27
FALSE	High	Master Protein	Q06323	Proteasome activator complex subunit 1 OS=Homo sapiens OX=9606 GN=PSME1 PE=1 SV=1	0	FALSE	202.69	76	20	228	20	1	249	28.7	6.02	662.85	20	metabolic process;regulation of biological process;response to stimulus;transport	cytoplasm;cytosol;proteasome	enzyme regulator activity;protein binding	Pf02251, Pf02252	5720	ENSG00000092010.14	PSME1	14	Proteasome; Antigen processing and presentation	Proteasome Degradation	0	1.033	0.927	1.091	1.195	1.11	0.404408	0.830015	0.972282	0.00225259	0.696276	70.24	76.58	71.56	77.44	73.17	91	108.4	101.1	99.5	31.62	46
FALSE	High	Master Protein	Q9NVA1	Ubiquinol-cytochrome-c reductase complex assembly factor 1 OS=Homo sapiens OX=9606 GN=UQCC1 PE=1 SV=3	0.002	FALSE	4.459	3	1	3	1	1	299	34.6	8.91	7.81	1	cell organization and biogenesis;regulation of biological process	membrane;mitochondrion	protein binding	Pf03981	55245	ENSG00000101019.21	UQCC; UQCC1	20			0	0.909	0.878	1.148	1.195	1.044	0.957893	0.876465	0.964945	0.656403	0.997101	36.72	15.4	27.44	19.97	20.83	93.6	110.6	89.2	106.6	19.05	22.63
FALSE	High	Master Protein	Q9UHL4	Dipeptidyl peptidase 2 OS=Homo sapiens OX=9606 GN=DPP7 PE=1 SV=3	0	FALSE	33.164	19	5	13	5	1	492	54.3	6.32	32.53	5	metabolic process;transport	cytosol;extracellular;Golgi;organelle lumen;vacuole	catalytic activity	Pf00561, Pf05577	29952	ENSG00000176978.13	DPP7	9			0	1.102	1.412	1.27	1.195	1.454	0.819147	0.294796	0.72186	0.485463	0.0671182	50.11	82.95	53.27	74.67	51.35	83.9	78	113.7	124.4	15.42	45.59
FALSE	Low	Master Protein	Q9Y385	Ubiquitin-conjugating enzyme E2 J1 OS=Homo sapiens OX=9606 GN=UBE2J1 PE=1 SV=2	0.09	FALSE	1.412	2	1	1	1	1	318	35.2	6.74	1.74	1	metabolic process;regulation of biological process	cytoplasm;endoplasmic reticulum;membrane	catalytic activity;nucleotide binding;protein binding	Pf00179	51465	ENSG00000198833.6	UBE2J1	6	Ubiquitin mediated proteolysis; Protein processing in endoplasmic reticulum; Parkinson's disease	Parkin-Ubiquitin Proteasomal System pathway; Parkinsons Disease Pathway	0	0.785	0.835	1.209	1.194	0.949	0.867507	0.91416	0.961921	0.865174	0.970824	17.75	18.76	8.84	7.31	24.2	112.1	88	93.6	106.3	22.12	12.35
FALSE	High	Master Protein	Q14149	MORC family CW-type zinc finger protein 3 OS=Homo sapiens OX=9606 GN=MORC3 PE=1 SV=3	0	FALSE	8.78	5	2	4	2	1	939	107	5.6	4.15	2	metabolic process;regulation of biological process	nucleus	metal ion binding;RNA binding	Pf02518, Pf04111, Pf05622, Pf07496, Pf11932, Pf13589	23515	ENSG00000159256.12	MORC3	21		Interactome of polycomb repressive complex 2 (PRC2)	0	0.86	0.587	0.929	1.194	0.706	0.953859	0.378487	0.926308	0.84318	0.528585	19.43	13.59	51.72	61.23	29.85	104.5	106.1	83.6	105.9	45.09	36.04
FALSE	High	Master Protein	Q9Y5L4	Mitochondrial import inner membrane translocase subunit Tim13 OS=Homo sapiens OX=9606 GN=TIMM13 PE=1 SV=1	0	FALSE	28.166	53	4	31	4	1	95	10.5	8.18	99.09	4	cell organization and biogenesis;transport	membrane;mitochondrion	metal ion binding;transporter activity	Pf02953	26517	ENSG00000099800.7	TIMM13	19			0	1.015	0.793	0.987	1.194	1.02	0.823401	0.150259	0.79659	0.0539274	0.996231	72.1	40.24	72.55	75.79	69.74	79.4	120.3	88.7	111.6	45	37.35
FALSE	High	Master Protein	P46736	Lys-63-specific deubiquitinase BRCC36 OS=Homo sapiens OX=9606 GN=BRCC3 PE=1 SV=2	0	FALSE	25.091	16	4	19	4	1	316	36	5.92	55.75	4	cell division;cell organization and biogenesis;metabolic process;regulation of biological process;response to stimulus	cytoplasm;cytoskeleton;cytosol;nucleus	catalytic activity;enzyme regulator activity;metal ion binding;protein binding	Pf01398	79184	ENSG00000185515.14	BRCC3	X	NOD-like receptor signaling pathway; Homologous recombination		0	0.941	0.856	1.095	1.194	1.024	0.987056	0.668278	0.980391	0.388464	0.996415	17.96	32.98	13.75	43.41	23.76	98.4	101.6	84.3	115.6	68.1	14.17
FALSE	High	Master Protein	Q9Y6J9	TAF6-like RNA polymerase II p300/CBP-associated factor-associated factor 65 kDa subunit 6L OS=Homo sapiens OX=9606 GN=TAF6L PE=1 SV=1	0	FALSE	15.121	9	3	4	3	1	622	67.8	8.97	11.39	3	cell organization and biogenesis;metabolic process;regulation of biological process	nucleus	catalytic activity;DNA binding;protein binding	Pf02969, Pf07571	10629	ENSG00000162227.7	TAF6L	11	Basal transcription factors; Herpes simplex infection		0	1.047	1.315	1.314	1.194	1.528	0.960434	0.837123	0.883316	0.843771	0.451083	36.98	42.2	40.4	57.83	28.99	104.3	80.9	74.5	140.3	14.82	50.04
FALSE	High	Master Protein	Q14678	KN motif and ankyrin repeat domain-containing protein 1 OS=Homo sapiens OX=9606 GN=KANK1 PE=1 SV=3	0	FALSE	23.802	5	4	19	4	1	1352	147.2	5.3	33.03	4	cell organization and biogenesis;metabolic process;regulation of biological process	cytoplasm;membrane;nucleus	protein binding	Pf00023, Pf05667, Pf10267, Pf12075, Pf12796, Pf13606, Pf13637, Pf13857	23189	ENSG00000107104.18	KANK1	9			0	1.176	0.874	0.953	1.194	1.044	0.70742	0.915348	0.921881	0.774933	0.9946	32.84	26.09	21.39	30.25	21.34	74.2	141.3	87	97.5	27.96	69.8
FALSE	High	Master Protein	Q70CQ2	Ubiquitin carboxyl-terminal hydrolase 34 OS=Homo sapiens OX=9606 GN=USP34 PE=1 SV=2	0	FALSE	25.732	2	5	10	5	1	3546	404	5.82	20.97	5	metabolic process;regulation of biological process;response to stimulus	cytosol	catalytic activity;protein binding	Pf00443, Pf13423	9736	ENSG00000115464.14	USP34	2			0	0.969	1.004	1.145	1.194	1.084	0.993866	0.989686	0.948995	0.551613	0.968988	39.97	33.39	38.57	32.61	42.48	87.1	89.7	108.8	114.5	15.03	25.62
FALSE	High	Master Protein	P40616	ADP-ribosylation factor-like protein 1 OS=Homo sapiens OX=9606 GN=ARL1 PE=1 SV=1	0	FALSE	78.955	73	8	75	8	1	181	20.4	5.72	252.78	8	cell organization and biogenesis;metabolic process;regulation of biological process;response to stimulus;transport	cytoplasm;cytosol;Golgi;membrane	catalytic activity;enzyme regulator activity;metal ion binding;nucleotide binding;protein binding;signal transducer activity	Pf00025, Pf00071, Pf00503, Pf01926, Pf04670, Pf08477, Pf09439	400	ENSG00000120805.13	ARL1	12			0	1.056	0.89	1.101	1.194	1.064	0.578536	0.693829	0.972282	0.0687026	0.961714	51.15	53.04	60.57	75.73	49.44	106.6	103	84.8	105.7	10.4	19.48
FALSE	High	Master Protein	P50225	Sulfotransferase 1A1 OS=Homo sapiens OX=9606 GN=SULT1A1 PE=1 SV=3	0	FALSE	101.387	65	14	92	7	1	295	34.1	6.62	325.29	14	metabolic process	cytoplasm;cytosol	catalytic activity;protein binding	Pf00685	6817	ENSG00000196502.11	SULT1A1	16	Chemical carcinogenesis	Tamoxifen metabolism; Vitamin A and Carotenoid Metabolism; Constitutive Androstane Receptor Pathway; Estrogen metabolism; Sulfation Biotransformation Reaction; Melatonin metabolism and effects; Metapathway biotransformation; Arylamine metabolism	7	1.022	0.897	1.079	1.193	1.117	0.800993	0.6914	0.998862	0.0488679	0.820455	45.25	38.56	47.55	36.31	39.03	89.9	125.5	89.7	94.9	41.95	37.69
FALSE	High	Master Protein	Q9H8V3	Protein ECT2 OS=Homo sapiens OX=9606 GN=ECT2 PE=1 SV=4	0.002	FALSE	4.958	2	1	7	1	1	914	103.4	7.71	16.37	1	cell differentiation;cell division;cell organization and biogenesis;regulation of biological process;response to stimulus;transport	cytoplasm;cytoskeleton;cytosol;nucleus	enzyme regulator activity;protein binding;signal transducer activity	Pf00533, Pf00621, Pf12738	1894	ENSG00000114346.13	ECT2	3		Gastric Cancer Network 1	0	0.826	0.699	1.01	1.193	0.834	0.902251	0.545867	0.980391	0.836758	0.827457	30.05	10.79	53.45	62.79	46.02	119.1	98.3	83.2	99.3	15.94	44.67
FALSE	High	Master Protein	Q5T0D9	Tumor protein p63-regulated gene 1-like protein OS=Homo sapiens OX=9606 GN=TPRG1L PE=1 SV=1	0	FALSE	13.895	28	3	13	3	1	272	30.2	7.34	17.36	3		membrane	protein binding	Pf12456	127262	ENSG00000158109.14	TPRG1L	1			0	0.819	0.891	1.158	1.193	1.063	0.776238	0.885875	0.943252	0.561707	0.992073	13.06	11.62	36.8	61.11	52.51	109.1	92.6	93.4	104.9	27.74	33.94
FALSE	High	Master Protein	P42892	Endothelin-converting enzyme 1 OS=Homo sapiens OX=9606 GN=ECE1 PE=1 SV=2	0.001	FALSE	6.042	4	2	2	2	1	770	87.1	5.88	2.3	2	metabolic process;regulation of biological process	endosome;membrane	catalytic activity;metal ion binding;protein binding	Pf01431, Pf05649	1889	ENSG00000117298.14	ECE1	1		Melatonin metabolism and effects; Corticotropin-releasing hormone signaling pathway; Endothelin Pathways; Sudden Infant Death Syndrome (SIDS) Susceptibility Pathways	0	0.976	1.133	1.406	1.193	1.168	0.999488	0.958172	0.572825	0.661399	0.929996	34.96	42.44	22.08	43.73	34.59	102.8	80.5	103.6	113.2	30.87	30.1
FALSE	High	Master Protein	Q5VU43	Myomegalin OS=Homo sapiens OX=9606 GN=PDE4DIP PE=1 SV=3	0	FALSE	25.723	3	5	19	4	1	2346	264.9	5.47	38.74	5											0	1.191	1.025	1.185	1.193	1.274	0.630291	0.999797	0.926308	0.561707	0.629783	25.18	35.48	39.99	52.4	26.75	129	83.8	97.4	89.9	30.99	63.21
FALSE	High	Master Protein	P17252	Protein kinase C alpha type OS=Homo sapiens OX=9606 GN=PRKCA PE=1 SV=4	0	FALSE	24.357	9	4	10	4	1	672	76.7	7.05	31.29	4	cell death;cell organization and biogenesis;cellular component movement;metabolic process;regulation of biological process;response to stimulus	cytoplasm;cytosol;endoplasmic reticulum;membrane;mitochondrion;nucleus	catalytic activity;metal ion binding;nucleotide binding;protein binding	Pf00069, Pf00130, Pf00168, Pf00433, Pf07714	5578	ENSG00000154229.11	PRKCA	17	Dopaminergic synapse; Serotonergic synapse; Amoebiasis; Tight junction; Vascular smooth muscle contraction; Glutamatergic synapse; Pathogenic Escherichia coli infection; Hepatitis B; HIF-1 signaling pathway; MicroRNAs in cancer; Amphetamine addiction; Phospholipase D signaling pathway; VEGF signaling pathway; Rap1 signaling pathway; Non-small cell lung cancer; MAPK signaling pathway; Oxytocin sig…	G Protein Signaling Pathways; Corticotropin-releasing hormone signaling pathway; Melatonin metabolism and effects; Pathogenic Escherichia coli infection; Spinal Cord Injury; miRs in Muscle Cell Differentiation; Endothelin Pathways; Calcium Regulation in the Cardiac Cell; Target Of Rapamycin (TOR) Signaling; EGF/EGFR Signaling Pathway; Wnt Signaling Pathway and Pluripotency; Kit receptor signaling…	0	0.917	1.113	1.38	1.192	1.209	0.97502	0.937814	0.403968	0.552244	0.635673	23.75	13.97	47.5	38.78	33.3	103.6	72.8	85	138.6	49.9	58.82
FALSE	High	Master Protein Candidate	P78368	Casein kinase I isoform gamma-2 OS=Homo sapiens OX=9606 GN=CSNK1G2 PE=1 SV=1	0	FALSE	12.145	7	3	12	3	1	415	47.4	9.06	21.81	3	metabolic process;regulation of biological process;response to stimulus;transport	cytoplasm;cytosol;membrane;nucleus	catalytic activity;metal ion binding;nucleotide binding;protein binding	Pf00069, Pf07714, Pf12605	1455	ENSG00000133275.15	CSNK1G2	19	Hedgehog signaling pathway		0	0.984	0.797	1.014	1.192	1.09	0.976252	0.581635	0.976793	0.556086	0.968988	23.31	27.89	27.99	38.55	31.86	106.9	104.5	75.8	112.8	14.43	28.81
FALSE	High	Master Protein	Q9Y6M4	Casein kinase I isoform gamma-3 OS=Homo sapiens OX=9606 GN=CSNK1G3 PE=1 SV=2	0	FALSE	12.145	6	3	12	3	1	447	51.4	9.22	21.81	3	metabolic process;regulation of biological process;response to stimulus;transport	cytoplasm;nucleus	catalytic activity;nucleotide binding	Pf00069, Pf07714, Pf12605	1456	ENSG00000151292.17	CSNK1G3	5	Hedgehog signaling pathway		0	0.984	0.797	1.014	1.192	1.09	0.976252	0.581635	0.976793	0.556086	0.968988	23.31	27.89	27.99	38.55	31.86	106.9	104.5	75.8	112.8	14.43	28.81
FALSE	High	Master Protein	Q9NQ55	Suppressor of SWI4 1 homolog OS=Homo sapiens OX=9606 GN=PPAN PE=2 SV=1	0	FALSE	31.577	22	6	11	6	1	473	53.2	10.13	23.62	6	cell organization and biogenesis	nucleus	RNA binding	Pf04427	56342; 692312	ENSG00000130810.19	PPAN; PPAN-P2RY11	19			0	0.981	0.748	0.927	1.192	0.772	0.985482	0.350212	0.819807	0.556478	0.179754	29.29	24.45	33.75	44.36	22.72	140.3	99.7	75.4	84.6	33.71	47.21
FALSE	High	Master Protein	Q9P253	Vacuolar protein sorting-associated protein 18 homolog OS=Homo sapiens OX=9606 GN=VPS18 PE=1 SV=2	0	FALSE	19.757	8	5	8	5	1	973	110.1	6.07	18.41	5	cell organization and biogenesis;metabolic process;regulation of biological process;transport	endosome;membrane;vacuole	catalytic activity;metal ion binding;protein binding	Pf00637, Pf05131, Pf12861	57617	ENSG00000104142.10	VPS18	15			0	0.803	0.925	1.276	1.192	1.023	0.80441	0.931127	0.770648	0.660551	0.992073	19	32.92	26.7	23.8	19.91	117.5	62.5	128	91.9	17.47	62.57
FALSE	High	Master Protein	Q8WU76	Sec1 family domain-containing protein 2 OS=Homo sapiens OX=9606 GN=SCFD2 PE=1 SV=2	0	FALSE	14.003	4	2	4	2	1	684	75.1	6.68	12.4	2	transport			Pf00995	152579	ENSG00000184178.15	SCFD2	4			0	1.085	1.195	1.239	1.192	1.436	0.817472	0.83805	0.751058	0.561481	0.0734128	32.53	45.07	32.33	69.62	28.9	95.8	99.7	106.1	98.4	16	16
FALSE	High	Master Protein	O15258	Protein RER1 OS=Homo sapiens OX=9606 GN=RER1 PE=1 SV=1	0	FALSE	14.061	19	3	13	3	1	196	22.9	9.54	28.63	3	cell organization and biogenesis;regulation of biological process;transport	cell surface;Golgi;membrane	protein binding	Pf03248	11079	ENSG00000157916.19	RER1	1			0	0.932	1.061	1.261	1.192	1.128	0.975522	0.989567	0.528621	0.207745	0.894214	24.81	43.98	36.7	42.5	30.82	91.2	89.6	93.9	125.2	14.47	27.82
FALSE	Medium	None	Q99962	Endophilin-A1 OS=Homo sapiens OX=9606 GN=SH3GL2 PE=1 SV=1	0.012	FALSE	3.015	2	1	7	1	1	352	39.9	5.45	12.47	1	cell growth;cell organization and biogenesis;cellular component movement;regulation of biological process;response to stimulus;transport	cytoplasm;cytosol;endosome;membrane	protein binding	Pf00018, Pf03114, Pf07653, Pf10455, Pf14604	6456	ENSG00000107295.9	SH3GL2	9	Endocytosis	EGF/EGFR Signaling Pathway	0	0.925	0.798	1.016	1.191	1	0.97502	0.60859	0.985781	0.593664	0.973539	15.26	10.14	11.44	12.59	15.92	105.8	104.1	84.4	105.8	18.03	19.04
FALSE	High	Master Protein	P41236	Protein phosphatase inhibitor 2 OS=Homo sapiens OX=9606 GN=PPP1R2 PE=1 SV=2	0	FALSE	13.569	18	2	6	2	1	205	23	4.74	17.63	2	metabolic process;regulation of biological process	cytosol	enzyme regulator activity;protein binding	Pf04979	5504	ENSG00000184203.7	PPP1R2	3			0	0.746	1.121	1.313	1.19	1.023	0.874696	0.979863	0.942261	0.868733	0.997101	36.96	90.86	94.46	93.93	76.47	95.5	107.4	101.9	95.2	150.07	147.74
FALSE	High	Master Protein	Q9NYL2	Mitogen-activated protein kinase kinase kinase 20 OS=Homo sapiens OX=9606 GN=MAP3K20 PE=1 SV=3	0	FALSE	30.609	9	5	10	5	1	800	91.1	7.87	28.67	5	cell death;cell differentiation;cell organization and biogenesis;cell proliferation;metabolic process;regulation of biological process;response to stimulus	cytoplasm;cytosol;nucleus	catalytic activity;metal ion binding;nucleotide binding;protein binding;RNA binding;signal transducer activity	Pf00069, Pf00536, Pf07714	51776	ENSG00000091436.16	ZAK; MAP3K20	2	Tight junction; MAPK signaling pathway	MAPK Signaling Pathway	0	0.954	0.843	1.091	1.19	1.045	0.999984	0.716066	0.991745	0.56023	0.992073	33.29	33.44	37.27	54.27	28.93	105.6	98.4	76.5	119.4	33.25	34.49
FALSE	High	None	Q86YB8	ERO1-like protein beta OS=Homo sapiens OX=9606 GN=ERO1B PE=1 SV=2	0.001	FALSE	5.58	2	1	7	1	1	467	53.5	7.99	16.36	1	cell organization and biogenesis;cellular homeostasis;metabolic process;regulation of biological process;transport	endoplasmic reticulum;membrane	catalytic activity;protein binding	Pf04137	56605	ENSG00000086619.13	ERO1LB; ERO1B	1	Protein processing in endoplasmic reticulum		0	0.886	0.999	1.317	1.19	1.189	0.913785	0.985786	0.703334	0.593664	0.856585	14.43	6.05	33.53	21	21	97.8	88.3	97.7	116.2	8.29	17.55
FALSE	High	Master Protein	Q9BSQ5	Cerebral cavernous malformations 2 protein OS=Homo sapiens OX=9606 GN=CCM2 PE=1 SV=1	0.004	FALSE	4.047	4	1	1	1	1	444	48.8	5.54	3.06	1	cell differentiation;cell organization and biogenesis;development;metabolic process;regulation of biological process;response to stimulus	cytoplasm;mitochondrion	protein binding		83605	ENSG00000136280.15	CCM2	7			0	1.107	1.01	0.979	1.189	1.201	0.90248	0.998828	0.966662	0.843771	0.93579	21.3	3.48	47.23	12.48	12.43	92.6	102.6	93.6	111.2		20.11
FALSE	High	Master Protein	P42226	Signal transducer and activator of transcription 6 OS=Homo sapiens OX=9606 GN=STAT6 PE=1 SV=1	0	FALSE	86.427	28	13	53	13	1	847	94.1	6.23	151.55	13	cell proliferation;metabolic process;regulation of biological process;response to stimulus	cytoplasm;cytosol;membrane;nucleus	DNA binding;protein binding;signal transducer activity	Pf00017, Pf01017, Pf02864, Pf02865, Pf14596	6778	ENSG00000166888.11	STAT6	12	Th1 and Th2 cell differentiation; Inflammatory bowel disease (IBD); Hepatitis B; Jak-STAT signaling pathway	IL-4 Signaling Pathway; VEGFA-VEGFR2 Signaling Pathway; Adipogenesis	0	1.026	0.834	0.993	1.189	1.007	0.840267	0.373312	0.881427	0.188805	0.992073	66.63	33.12	51.57	42.38	49.43	95.2	122.8	83.5	98.4	8.52	7.62
FALSE	High	Master Protein	P59190	Ras-related protein Rab-15 OS=Homo sapiens OX=9606 GN=RAB15 PE=1 SV=1	0	FALSE	15.102	15	3	40	1	1	212	24.4	5.71	112	3	regulation of biological process;response to stimulus;transport	cytoplasm;membrane	catalytic activity;nucleotide binding;protein binding	Pf00025, Pf00071, Pf00735, Pf01926, Pf04670, Pf08477, Pf13212	376267	ENSG00000139998.14	RAB15	14			0	1.055	1.208	1.36	1.188	1.434	0.939955	0.948402	0.877584	0.865174	0.754516	0	0	0	0	0	85.2	89.8	102.8	122.2
FALSE	High	Master Protein	Q14137	Ribosome biogenesis protein BOP1 OS=Homo sapiens OX=9606 GN=BOP1 PE=1 SV=2	0	FALSE	32.01	13	5	20	5	1	746	83.6	6.19	58.43	5	cell organization and biogenesis;cell proliferation;metabolic process;regulation of biological process	nucleus	protein binding;RNA binding	Pf00400, Pf08145	23246	ENSG00000261236.7	BOP1	8			0	1.074	0.702	0.903	1.188	0.831	0.572876	0.0130119	0.425783	0.201887	0.132313	45.62	20.89	38.84	87.4	34.61	120.1	99.4	82.4	98.1	40.25	49.4
FALSE	Medium	Master Protein	P22692	Insulin-like growth factor-binding protein 4 OS=Homo sapiens OX=9606 GN=IGFBP4 PE=1 SV=2	0.014	FALSE	2.891	6	1	2	1	1	258	27.9	7.15	4.94	1	cell proliferation;defense response;metabolic process;regulation of biological process;response to stimulus	extracellular;organelle lumen	protein binding	Pf00086, Pf00219	3487	ENSG00000141753.6	IGFBP4	17		Myometrial Relaxation and Contraction Pathways	0	0.01	0.717	100	1.187	0.851	4.49643e-16	0.60116	4.24865e-16	0.844138	0.862595		26.62		59.8	34.19	155.7		111.7	132.6	53.77
FALSE	High	Master Protein	P54105	Methylosome subunit pICln OS=Homo sapiens OX=9606 GN=CLNS1A PE=1 SV=1	0	FALSE	52.932	49	5	25	5	1	237	26.2	4.11	105.48	5	cell organization and biogenesis;cellular homeostasis;transport	cytoplasm;cytoskeleton;cytosol;membrane;nucleus	protein binding;RNA binding	Pf03517	1207	ENSG00000074201.8	CLNS1A	11	RNA transport		0	0.924	0.851	1.044	1.187	1.137	0.967224	0.504502	0.991683	0.32569	0.798918	23.56	28.84	29.48	29.6	24.79	152.4	109.8	36.1	101.8	46.3	42.16
FALSE	Medium	None	Q04844	Acetylcholine receptor subunit epsilon OS=Homo sapiens OX=9606 GN=CHRNE PE=1 SV=2	0.014	FALSE	2.853	1	1	1	1	1	493	54.7	5.26	1.72	1	cell communication;regulation of biological process;response to stimulus;transport	membrane	receptor activity;signal transducer activity;transporter activity	Pf02931, Pf02932	1145	ENSG00000108556.7	CHRNE	17	Neuroactive ligand-receptor interaction		0	0.989	0.855	1.026	1.186	1.015	0.989307	0.930654	0.995898	0.869374	0.992073	30.15	23.3	7.05	3.02	31.71	103.7	102.5	88.7	105.2	30.17	6.86
FALSE	High	Master Protein	Q9BYX2	TBC1 domain family member 2A OS=Homo sapiens OX=9606 GN=TBC1D2 PE=1 SV=3	0	FALSE	67.046	17	10	26	10	1	928	105.3	6.58	83.75	10	regulation of biological process;transport	cytoplasm;cytosol;nucleus	enzyme regulator activity;protein binding	Pf00169, Pf00566, Pf15413	55357	ENSG00000095383.19	TBC1D2	9			0	1.287	0.946	0.871	1.186	1.033	0.0311825	0.920809	0.382609	0.330049	0.997101	44.1	28.09	39.78	30.19	26.14	95.2	134.6	84.6	85.5	9.84	18.95
FALSE	High	Master Protein	Q9Y5B9	FACT complex subunit SPT16 OS=Homo sapiens OX=9606 GN=SUPT16H PE=1 SV=1	0	FALSE	187.83	30	26	122	26	1	1047	119.8	5.66	415.11	26	cell organization and biogenesis;metabolic process;regulation of biological process;response to stimulus	chromosome;nucleus	protein binding;RNA binding	Pf00557, Pf08512, Pf08644, Pf14826	11198	ENSG00000092201.9	SUPT16H	14			0	0.986	0.905	1.023	1.186	1.003	0.913026	0.735056	0.942592	0.0251351	0.995078	36.27	37.15	32.01	45.62	36.58	101.9	105.4	78.9	113.8	27.44	16.55
FALSE	High	Master Protein	P13498	Cytochrome b-245 light chain OS=Homo sapiens OX=9606 GN=CYBA PE=1 SV=3	0	FALSE	11.02	16	1	12	1	1	195	21	9.54	28.16	1	cell organization and biogenesis;cellular homeostasis;defense response;metabolic process;regulation of biological process;response to stimulus;transport	cytoplasm;endosome;Golgi;membrane;mitochondrion;nucleus	catalytic activity;metal ion binding;protein binding	Pf05038	1535	ENSG00000051523.10	CYBA	16	NOD-like receptor signaling pathway; Osteoclast differentiation; Leishmaniasis; Phagosome; Leukocyte transendothelial migration	TNF alpha Signaling Pathway; Oxidative Stress; Microglia Pathogen Phagocytosis Pathway	0	0.745	0.867	1.171	1.186	0.873	0.103291	0.754316	0.887615	0.501061	0.681278	18.69	38.59	33.41	37.4	37.58	126.9	85.5	79.6	108.1	43.31	18.19
FALSE	High	Master Protein	O75976	Carboxypeptidase D OS=Homo sapiens OX=9606 GN=CPD PE=1 SV=2	0	FALSE	88.598	18	17	54	17	1	1380	152.8	6.05	138.08	17	metabolic process	membrane	catalytic activity;metal ion binding	Pf00246, Pf04952, Pf13620, Pf13715	1362	ENSG00000108582.11	CPD	17			0	1.029	1.032	1.198	1.185	1.245	0.861304	0.999797	0.743662	0.123904	0.239159	32.95	33.93	27.31	35.46	33.84	88.9	88.6	112.7	109.8	3.37	17.15
FALSE	High	Master Protein	O60732	Melanoma-associated antigen C1 OS=Homo sapiens OX=9606 GN=MAGEC1 PE=1 SV=3	0	FALSE	41.343	7	7	46	6	1	1142	123.6	4.3	124.45	7			protein binding	Pf01454	9947	ENSG00000155495.8	MAGEC1	X			0	0.909	0.976	1.203	1.185	1.101	0.92378	0.953754	0.726669	0.216213	0.887365	20.25	31.62	35.61	41.23	32.07	111	95.5	70.2	123.4	54.48	38.73
FALSE	Medium	None	Q6U841	Sodium-driven chloride bicarbonate exchanger OS=Homo sapiens OX=9606 GN=SLC4A10 PE=2 SV=1	0.028	FALSE	2.336	1	1	1	1	1	1118	125.9	6.49	0	1	cellular homeostasis;response to stimulus;transport	membrane	transporter activity	Pf00955, Pf07565	57282	ENSG00000144290.16	SLC4A10	2			0	0.768	0.861	1.464	1.184	1.02	0.837863	0.933457	0.735208	0.865174	0.997101	37.12	35.87	57.67	69.9	48.4	108.7	83.5	119.2	88.6	47.85	58.72
FALSE	High	Master Protein	Q9Y6M7	Sodium bicarbonate cotransporter 3 OS=Homo sapiens OX=9606 GN=SLC4A7 PE=1 SV=2	0	FALSE	14.982	5	3	4	3	1	1214	136	6.71	7.86	3	cellular homeostasis;transport	membrane	transporter activity	Pf00359, Pf00955, Pf07565	9497	ENSG00000033867.16	SLC4A7	3			0	0.656	0.861	0.974	1.184	0.815	0.492128	0.912437	0.96747	0.864403	0.803291	20.75	35.87	78.47	69.9	43.95	130.1	110	82.3	77.6	11.66	68.38
FALSE	High	Master Protein	Q9P003	Protein cornichon homolog 4 OS=Homo sapiens OX=9606 GN=CNIH4 PE=1 SV=1	0	FALSE	11.189	14	1	7	1	1	139	16.1	6.65	30.55	1	transport	endoplasmic reticulum;membrane	protein binding	Pf03311	29097	ENSG00000143771.11	CNIH4	1			0	0.932	0.963	1.194	1.184	1.016	0.987056	0.953754	0.886164	0.593664	0.992671	24.72	28.89	47.54	31.35	51.59	93.8	87.4	90.3	128.5	40.31	44.16
FALSE	High	Master Protein	Q9BZI7	Regulator of nonsense transcripts 3B OS=Homo sapiens OX=9606 GN=UPF3B PE=1 SV=1	0	FALSE	21.324	12	4	12	4	1	483	57.7	9.48	24.72	4	metabolic process;regulation of biological process;transport	cytoplasm;cytosol;nucleus	protein binding;RNA binding;transporter activity	Pf03467	65109	ENSG00000125351.11	UPF3B	X	mRNA surveillance pathway; RNA transport		0	0.91	0.855	1.159	1.184	1.029	0.976234	0.906212	0.966662	0.818838	0.999858	32.22	29.91	39.95	35.65	32.66	93.7	98.5	100.8	106.9	17.96	37.74
FALSE	High	Master Protein	Q9BRT9	DNA replication complex GINS protein SLD5 OS=Homo sapiens OX=9606 GN=GINS4 PE=1 SV=1	0.002	FALSE	4.868	12	2	2	2	1	223	26	4.98	0	2	cell proliferation;metabolic process;response to stimulus	cytoplasm;nucleus	catalytic activity;protein binding	Pf05916	84296	ENSG00000147536.11	GINS4	8			0	0.791	1.101	1.549	1.183	1.224	0.849598	0.96769	0.300526	0.684715	0.827611	25.91	34.85	34.25	41.28	16.79	90.5	60.9	99.6	149.1	28.31	27.41
FALSE	High	Master Protein	Q96L92	Sorting nexin-27 OS=Homo sapiens OX=9606 GN=SNX27 PE=1 SV=2	0	FALSE	43.105	20	8	26	8	1	541	61.2	6.49	60.11	8	regulation of biological process;response to stimulus;transport	cytoplasm;cytosol;endosome;membrane	protein binding	Pf00595, Pf00787, Pf00788	81609	ENSG00000143376.12	SNX27	1			0	0.818	0.822	1.067	1.182	0.927	0.449111	0.395768	0.999979	0.332914	0.844967	23.13	24.62	35.68	31.33	41.05	122.1	93.1	80.8	103.9	16.15	9.99
FALSE	High	Master Protein	Q7Z4R8	UPF0669 protein C6orf120 OS=Homo sapiens OX=9606 GN=C6orf120 PE=1 SV=1	0	FALSE	15.501	34	2	6	2	1	191	20.8	4.84	9.48	2	cell death;transport	extracellular;organelle lumen			387263	ENSG00000185127.6	C6orf120	6			0	0.988	0.966	1.093	1.182	1.002	0.982528	0.961239	0.998862	0.593664	0.973497	49.84	33.46	31.06	38.79	36.13	30.7	172.3	89.3	107.7	107.84
FALSE	High	Master Protein	O75787	Renin receptor OS=Homo sapiens OX=9606 GN=ATP6AP2 PE=1 SV=2	0	FALSE	40.52	19	4	21	4	1	350	39	6.1	83.62	4	cellular component movement;metabolic process;regulation of biological process;response to stimulus;transport	membrane	protein binding;receptor activity;transporter activity	Pf07850	10159	ENSG00000182220.14	ATP6AP2	X	Renin-angiotensin system	ACE Inhibitor Pathway; Oxidative phosphorylation	0	0.801	0.738	1.183	1.182	0.928	0.336536	0.0378589	0.80286	0.242392	0.818219	44.51	38.68	57.04	43.37	55.68	130.2	88.4	95.5	85.8	4.09	20.38
FALSE	Medium	None	Q3L8U1	Chromodomain-helicase-DNA-binding protein 9 OS=Homo sapiens OX=9606 GN=CHD9 PE=1 SV=2	0.023	FALSE	2.536	0	1	2	1	1	2897	325.8	7.01	3.56	1	cell organization and biogenesis;metabolic process;regulation of biological process	cytoplasm;nucleus	catalytic activity;DNA binding;nucleotide binding;protein binding	Pf00176, Pf00270, Pf00271, Pf00385, Pf07533, Pf11496	80205	ENSG00000177200.16	CHD9	16			0	0.89	0.932	1.05	1.181	0.953	0.97502	0.971702	0.998862	0.875676	0.966493	12.69	6.91	21.48	23.38	18.35	106	94.3	98.7	101	3.42	22.31
FALSE	Medium	None	Q9P2D1	Chromodomain-helicase-DNA-binding protein 7 OS=Homo sapiens OX=9606 GN=CHD7 PE=1 SV=3	0.023	FALSE	2.536	0	1	2	1	1	2997	335.7	6.34	3.56	1	cell differentiation;cell organization and biogenesis;metabolic process;regulation of biological process;response to stimulus	nucleus	catalytic activity;DNA binding;nucleotide binding;protein binding	Pf00176, Pf00270, Pf00271, Pf00385, Pf07223, Pf07533, Pf09606, Pf09770	55636	ENSG00000171316.11	CHD7	8			0	0.89	0.932	1.05	1.181	0.953	0.97502	0.971702	0.998862	0.875676	0.966493	12.69	6.91	21.48	23.38	18.35	106	94.3	98.7	101	3.42	22.31
FALSE	High	None	P48454	Serine/threonine-protein phosphatase 2B catalytic subunit gamma isoform OS=Homo sapiens OX=9606 GN=PPP3CC PE=1 SV=3	0.001	FALSE	6.322	3	2	17	0	1	512	58.1	6.98	24.83	2	metabolic process;regulation of biological process	cytosol;mitochondrion	catalytic activity;metal ion binding;protein binding	Pf00149	5533	ENSG00000120910.14	PPP3CC	8	Dopaminergic synapse; Th1 and Th2 cell differentiation; T cell receptor signaling pathway; Osteoclast differentiation; Glutamatergic synapse; Amphetamine addiction; cGMP-PKG signaling pathway; Renin secretion; B cell receptor signaling pathway; VEGF signaling pathway; MAPK signaling pathway; Oxytocin signaling pathway; Natural killer cell mediated cytotoxicity; Long-term potentiation; Tuberculosi…	Alzheimers Disease; Energy Metabolism; G Protein Signaling Pathways; Initiation of transcription and translation elongation at the HIV-1 LTR; Amyotrophic lateral sclerosis (ALS); MAPK Signaling Pathway	0	0.911	0.893	1.119	1.18	1.061	0.957893	0.891593	0.972282	0.586625	0.99332	28.8	37.36	35.4	43.58	21.6	97.7	90.3	105.8	106.2	11.01	34.33
FALSE	High	Master Protein	Q8WVY7	Ubiquitin-like domain-containing CTD phosphatase 1 OS=Homo sapiens OX=9606 GN=UBLCP1 PE=1 SV=2	0	FALSE	27.35	29	5	31	5	1	318	36.8	6.46	66.78	5	metabolic process	nucleus	catalytic activity;protein binding	Pf00240, Pf03031	134510	ENSG00000164332.7	UBLCP1	5			0	0.985	0.985	0.954	1.18	1.105	0.976075	0.96416	0.774025	0.274352	0.948374	33.3	53.62	42.08	61.6	45.85	82.8	125.1	96.8	95.3	26.08	28.78
FALSE	High	Master Protein	Q9NXE4	Sphingomyelin phosphodiesterase 4 OS=Homo sapiens OX=9606 GN=SMPD4 PE=1 SV=3	0	FALSE	63.535	18	11	49	11	1	866	97.7	8.27	142.74	11											0	0.936	1.014	1.15	1.18	1.18	0.98003	0.989567	0.897368	0.214303	0.635673	27.27	30.75	25.19	35.26	22.44	95.7	78.1	110.8	115.4	20.22	5.24
FALSE	High	Master Protein	Q13043	Serine/threonine-protein kinase 4 OS=Homo sapiens OX=9606 GN=STK4 PE=1 SV=2	0	FALSE	19.128	6	2	11	1	1	487	55.6	5.07	40.85	2	cell death;cell differentiation;cell organization and biogenesis;metabolic process;regulation of biological process;response to stimulus	cytoplasm;cytosol;nucleus	catalytic activity;enzyme regulator activity;metal ion binding;nucleotide binding;protein binding	Pf00069, Pf07714, Pf11629	6789	ENSG00000101109.11	STK4	20	FoxO signaling pathway; Non-small cell lung cancer; MAPK signaling pathway; Pathways in cancer; Ras signaling pathway		0	0.665	0.626	1.112	1.18	0.739	0.408733	0.25336	0.998862	0.854302	0.454513	13.8	18.95	28.66	38.63	19.1	132	87.8	82.7	97.5	1.78	29.5
FALSE	High	Master Protein	Q8WUX9	Charged multivesicular body protein 7 OS=Homo sapiens OX=9606 GN=CHMP7 PE=1 SV=1	0	FALSE	38.698	15	5	20	5	1	453	50.9	5.35	57.17	5	cell organization and biogenesis;transport	chromosome;cytoplasm;cytosol;nucleus	protein binding;transporter activity	Pf03357	91782	ENSG00000147457.13	CHMP7	8	Endocytosis		0	0.94	1.077	1.263	1.18	1.179	0.988538	0.961239	0.712988	0.538448	0.74745	22.53	42.08	27.2	49.2	20.81	95.9	92.9	104.3	106.9	35.48	30.37
FALSE	Medium	Master Protein	Q86WR0	Coiled-coil domain-containing protein 25 OS=Homo sapiens OX=9606 GN=CCDC25 PE=1 SV=2	0.028	FALSE	2.37	5	1	2	1	1	208	24.5	6.8	5.23	1			protein binding	Pf05670	55246	ENSG00000147419.17	CCDC25	8			0	0.967	1.126	1.373	1.179	1.328	0.993866	0.974896	0.850184	0.876824	0.859589	0	0	0	0	0	90.5	87.5	101.9	120.1
FALSE	High	None	Q9Y2T4	Serine/threonine-protein phosphatase 2A 55 kDa regulatory subunit B gamma isoform OS=Homo sapiens OX=9606 GN=PPP2R2C PE=1 SV=4	0.001	FALSE	6.447	3	1	4	0	2	447	51.5	6.37	13.6	1	metabolic process;regulation of biological process	cytosol	catalytic activity;enzyme regulator activity;protein binding		5522	ENSG00000074211.13	PPP2R2C	4	Dopaminergic synapse; Chagas disease (American trypanosomiasis); Tight junction; Hippo signaling pathway; Adrenergic signaling in cardiomyocytes; AMPK signaling pathway; mRNA surveillance pathway; Sphingolipid signaling pathway; Hepatitis C; PI3K-Akt signaling pathway	Wnt Signaling Pathway and Pluripotency; Glycogen Metabolism; Focal Adhesion-PI3K-Akt-mTOR-signaling pathway	0	0.945	0.876	0.934	1.179	0.866	0.987056	0.874852	0.886164	0.773523	0.754516	7.98	27.21	12.96	13.8	9.2	113.6	107.4	80.6	98.4	16.39	12.71
FALSE	High	Master Protein	Q13286	Battenin OS=Homo sapiens OX=9606 GN=CLN3 PE=1 SV=1	0	FALSE	17.064	9	2	8	2	1	438	47.6	6.38	19.76	2	cell communication;cell organization and biogenesis;cellular component movement;cellular homeostasis;metabolic process;regulation of biological process;response to stimulus;transport	cytoplasm;endoplasmic reticulum;endosome;Golgi;membrane;mitochondrion;nucleus;vacuole	protein binding	Pf02487	1201	ENSG00000188603.18; ENSG00000261832.6	CLN3	16	Lysosome		0	0.891	0.888	1.142	1.178	0.959	0.968068	0.931164	0.972282	0.798872	0.974427	38.2	28.49	12.88	45.55	39.77	105.1	98.2	85.8	110.9	75.26	67.23
TRUE	High	Master Protein	Q7Z7E8	Ubiquitin-conjugating enzyme E2 Q1 OS=Homo sapiens OX=9606 GN=UBE2Q1 PE=1 SV=1	0	FALSE	11.001	10	3	4	3	1	422	46.1	5.1	11.43	3	metabolic process;response to stimulus;transport	cytoplasm;cytosol;nucleus	catalytic activity;nucleotide binding;protein binding		55585	ENSG00000160714.9	UBE2Q1	1	Ubiquitin mediated proteolysis		0	0.097	0.142	1.728	1.178	0.167	4.49643e-16	3.59486e-16	0.604732	0.864275	2.29093e-09	1.12	8.29	125.78	411.54	0	93.3	9	282.1	15.6		134.45
FALSE	High	Master Protein	Q8WUJ3	Cell migration-inducing and hyaluronan-binding protein OS=Homo sapiens OX=9606 GN=CEMIP PE=1 SV=2	0	FALSE	37.203	7	7	26	7	1	1361	152.9	7.85	60.13	7	metabolic process;regulation of biological process	cytoplasm;endoplasmic reticulum;extracellular;membrane;nucleus	catalytic activity;protein binding	Pf10162, Pf13330	57214	ENSG00000103888.16	KIAA1199; CEMIP	15			0	1.1	0.703	0.719	1.178	0.761	0.674921	0.0706185	0.0084542	0.548951	0.116339	42.94	17.58	17.4	28.99	23.43	107.2	125.1	74.9	92.8	14.91	3.05
FALSE	High	Master Protein	Q9HCE5	N6-adenosine-methyltransferase non-catalytic subunit OS=Homo sapiens OX=9606 GN=METTL14 PE=1 SV=2	0	FALSE	12.029	9	2	2	2	1	456	52.1	6.21	6.2	2	cell differentiation;metabolic process;regulation of biological process	nucleus	catalytic activity;protein binding;RNA binding	Pf05063	57721	ENSG00000145388.14	METTL14	4			0	1.063	0.823	0.962	1.177	0.987	0.911147	0.825816	0.926308	0.778845	0.975313	19.38	11.58	24.11	14.65	8.75	102.9	115	81.9	100.2	8.67	21.55
FALSE	High	Master Protein	Q12872	Splicing factor, suppressor of white-apricot homolog OS=Homo sapiens OX=9606 GN=SFSWAP PE=1 SV=3	0	FALSE	12.858	3	3	9	3	1	951	104.8	8.05	22.15	3	cell organization and biogenesis;metabolic process;regulation of biological process	nucleus	protein binding;RNA binding	Pf01805, Pf09750	6433	ENSG00000061936.9	SFSWAP	12		mRNA Processing	0	0.874	0.897	1.095	1.177	0.965	0.864619	0.85145	0.991745	0.593664	0.961714	26.84	29.48	51.5	50.87	42.13	110.5	107.8	77.4	104.3	5.4	26.63
FALSE	Medium	None	Q86XX4	Extracellular matrix protein FRAS1 OS=Homo sapiens OX=9606 GN=FRAS1 PE=1 SV=2	0.041	FALSE	2.05	0	1	9	1	1	4008	442.9	5.57	16.18	1	cell communication;metabolic process;regulation of biological process;response to stimulus;transport	membrane	catalytic activity;metal ion binding;nucleotide binding;protein binding;receptor activity;signal transducer activity	Pf00093, Pf00757, Pf03160, Pf03302, Pf14843	80144		FRAS1	4			0	0.91	0.824	1.275	1.177	1.019	0.97502	0.87405	0.812688	0.789551	0.997101	11.2	21.08	13.52	11.91	25.65	98.1	89.3	97.7	115	14.29	5.19
FALSE	High	Master Protein	Q6UWP2	Dehydrogenase/reductase SDR family member 11 OS=Homo sapiens OX=9606 GN=DHRS11 PE=1 SV=1	0	FALSE	29.265	27	5	16	5	1	260	28.3	6.64	47.47	5	metabolic process	extracellular	catalytic activity;nucleotide binding	Pf00106, Pf01370, Pf05368, Pf08659, Pf13460, Pf13561	79154	ENSG00000278535.4; ENSG00000275397.2	DHRS11	17; CHR_HSCHR17_7_CTG4			0	1.079	1.129	1.293	1.176	1.185	0.823401	0.911015	0.567526	0.48632	0.706437	26.05	25.57	26.63	24.47	24.8	84.8	96	97.9	121.2	40.17	41.55
FALSE	High	Master Protein	P33908	Mannosyl-oligosaccharide 1,2-alpha-mannosidase IA OS=Homo sapiens OX=9606 GN=MAN1A1 PE=1 SV=3	0	FALSE	27.22	11	5	16	5	1	653	72.9	6.47	43.89	5	metabolic process	cytosol;endoplasmic reticulum;Golgi;membrane	catalytic activity;metal ion binding	Pf01532	4121	ENSG00000111885.6	MAN1A1	6	N-Glycan biosynthesis; Protein processing in endoplasmic reticulum; Metabolic pathways		0	0.96	1.053	1.115	1.176	1.164	0.993866	0.978964	0.96747	0.556086	0.803291	40.19	32.36	20.8	22.74	32.49	102.4	91.9	96.1	109.7	24.7	31.87
FALSE	High	Master Protein	Q16850	Lanosterol 14-alpha demethylase OS=Homo sapiens OX=9606 GN=CYP51A1 PE=1 SV=3	0	FALSE	100.106	47	17	54	17	1	503	56.8	8.53	143.01	17	metabolic process;regulation of biological process	endoplasmic reticulum;membrane	catalytic activity;metal ion binding	Pf00067	1595		CYP51A1	7	Steroid biosynthesis; Metabolic pathways	Sterol Regulatory Element-Binding Proteins (SREBP) signalling; Oxidation by Cytochrome P450; Metapathway biotransformation; Cholesterol Biosynthesis	0	0.87	0.734	0.97	1.176	0.861	0.671316	0.0212186	0.720443	0.127072	0.185846	22.85	16.22	45.67	44.25	35.7	110.3	95	87.8	107	10.26	4.64
[truncated: 5,957 more rows]
[truncated: 27 more columns]
