# Supplementary material for: Mutant KRAS-Associated Proteome Is Mainly Controlled by Exogenous Factors
Source: Cells. 2022 Jun 21;11(13):1988. doi: 10.3390/cells11131988 (PMC9265670; doi:10.3390/cells11131988)
Supplement: Supplementary file 1 [file cells-11-01988-s001.zip › Supplementary file S3_HCT116_siCTRL_FibCM_vs_siCTRL_ctrlCM.xlsx]

## Sheet: Folha1
Checked	Protein FDR Confidence: Combined	Master	Accession	Description	Exp. q-value: Combined	Contaminant	Sum PEP Score	Coverage [%]	# Peptides	# PSMs	# Unique Peptides	# Protein Groups	# AAs	MW [kDa]	calc. pI	Score Sequest HT: Sequest HT	# Peptides (by Search Engine): Sequest HT	Biological Process	Cellular Component	Molecular Function	Pfam IDs	Entrez Gene ID	Ensembl Gene ID	Gene Symbol	Chromosome	KEGG Pathways	WikiPathways	# Razor Peptides	Abundance Ratio: (2_HCT116_siCTRL_FibCM) / (1_HCT116_siCTRL_ctrlCM)	Abundance Ratio: (3_HCT116_siKRAS_ctrlCM) / (1_HCT116_siCTRL_ctrlCM)	Abundance Ratio: (4_HCT116_siKRAS_FibCM) / (2_HCT116_siCTRL_FibCM)	Abundance Ratio: (4_HCT116_siKRAS_FibCM) / (3_HCT116_siKRAS_ctrlCM)	Abundance Ratio: (4_HCT116_siKRAS_FibCM) / (1_HCT116_siCTRL_ctrlCM)	Abundance Ratio Adj. P-Value: (2_HCT116_siCTRL_FibCM) / (1_HCT116_siCTRL_ctrlCM)	Abundance Ratio Adj. P-Value: (3_HCT116_siKRAS_ctrlCM) / (1_HCT116_siCTRL_ctrlCM)	Abundance Ratio Adj. P-Value: (4_HCT116_siKRAS_FibCM) / (2_HCT116_siCTRL_FibCM)	Abundance Ratio Adj. P-Value: (4_HCT116_siKRAS_FibCM) / (3_HCT116_siKRAS_ctrlCM)	Abundance Ratio Adj. P-Value: (4_HCT116_siKRAS_FibCM) / (1_HCT116_siCTRL_ctrlCM)	Abundance Ratio Variability [%]: (2_HCT116_siCTRL_FibCM) / (1_HCT116_siCTRL_ctrlCM)	Abundance Ratio Variability [%]: (3_HCT116_siKRAS_ctrlCM) / (1_HCT116_siCTRL_ctrlCM)	Abundance Ratio Variability [%]: (4_HCT116_siKRAS_FibCM) / (2_HCT116_siCTRL_FibCM)	Abundance Ratio Variability [%]: (4_HCT116_siKRAS_FibCM) / (3_HCT116_siKRAS_ctrlCM)	Abundance Ratio Variability [%]: (4_HCT116_siKRAS_FibCM) / (1_HCT116_siCTRL_ctrlCM)	Abundances (Grouped): 1_HCT116_siCTRL_ctrlCM	Abundances (Grouped): 2_HCT116_siCTRL_FibCM	Abundances (Grouped): 3_HCT116_siKRAS_ctrlCM	Abundances (Grouped): 4_HCT116_siKRAS_FibCM	Abundances (Grouped) CV [%]: 1_HCT116_siCTRL_ctrlCM	Abundances (Grouped) CV [%]: 2_HCT116_siCTRL_FibCM
TRUE	High	Master Protein	Q9H173	Nucleotide exchange factor SIL1 OS=Homo sapiens OX=9606 GN=SIL1 PE=1 SV=1	0	FALSE	9.911	9	3	3	3	1	461	52.1	5.36	6.94	3	metabolic process;transport	endoplasmic reticulum;organelle lumen	protein binding		64374	ENSG00000120725.12	SIL1	5	Protein processing in endoplasmic reticulum		0	100		1.014	100	100	4.12715e-16		0.999922	3.05343e-16	3.35161e-16			194.46				198.6		201.4		22.51
TRUE	High	Master Protein	Q9BW04	Specifically androgen-regulated gene protein OS=Homo sapiens OX=9606 GN=SARG PE=1 SV=2	0	FALSE	11.828	7	2	2	2	1	601	63.9	8.62	6.94	2		cytoplasm;cytosol;membrane	protein binding	Pf15385	79098	ENSG00000182795.12	C1orf116	1			0	100	100	0.01	0.01		4.12715e-16	3.81902e-16	3.26911e-16	3.05343e-16								108.8	291.2			56.59
TRUE	High	Master Protein	Q8NEM2	SHC SH2 domain-binding protein 1 OS=Homo sapiens OX=9606 GN=SHCBP1 PE=1 SV=3	0	FALSE	6.648	7	2	2	2	1	672	75.6	4.75	2.58	2	regulation of biological process;response to stimulus	cytoplasm;cytoskeleton	protein binding	Pf05048, Pf12708, Pf13229	79801	ENSG00000171241.8	SHCBP1	16			0	100		1.009	100	100	4.12715e-16		0.999922	3.05343e-16	3.35161e-16			0				199.1		200.9
TRUE	High	Master Protein	P09758	Tumor-associated calcium signal transducer 2 OS=Homo sapiens OX=9606 GN=TACSTD2 PE=1 SV=3	0	FALSE	20.982	18	3	4	3	1	323	35.7	8.87	11.37	3	cell proliferation;regulation of biological process;response to stimulus	cytosol;membrane;nucleus	protein binding;receptor activity	Pf00086	4070	ENSG00000184292.6	TACSTD2	1			0	100	100	10.356	0.584	100	4.12715e-16	3.81902e-16	3.74916e-09	0.0787509	3.35161e-16			0	33.11			17	228.4	154.5
TRUE	High	Master Protein	Q9NUL3	Double-stranded RNA-binding protein Staufen homolog 2 OS=Homo sapiens OX=9606 GN=STAU2 PE=1 SV=2	0	FALSE	6.823	6	3	6	2	1	570	62.6	9.61	5.36	3											0	100		0.01			4.12715e-16		3.26911e-16									400
TRUE	High	Master Protein	O75911	Short-chain dehydrogenase/reductase 3 OS=Homo sapiens OX=9606 GN=DHRS3 PE=1 SV=2	0	FALSE	11.003	11	2	2	2	1	302	33.5	8.84	8.1	2	metabolic process;regulation of biological process	membrane	catalytic activity;nucleotide binding	Pf00106, Pf01370, Pf02719, Pf08659, Pf13561	9249	ENSG00000162496.8	DHRS3	1	Retinol metabolism; Metabolic pathways	Vitamin A and Carotenoid Metabolism	0	100	100	2.615	2.898	100	4.12715e-16	3.81902e-16	0.0198612	0.00532369	3.35161e-16			0	214.41			77.7	42.9	279.4
TRUE	High	Master Protein	Q14562	ATP-dependent RNA helicase DHX8 OS=Homo sapiens OX=9606 GN=DHX8 PE=1 SV=1	0	FALSE	9.849	3	3	9	2	1	1220	139.2	8.32	12.49	3	metabolic process	cytoplasm;nucleus;spliceosomal complex	catalytic activity;nucleotide binding;protein binding;RNA binding	Pf00271, Pf00575, Pf04408, Pf07717	1659	ENSG00000067596.10	DHX8	17	Spliceosome	mRNA Processing	0	100		0.01			4.12715e-16		3.26911e-16									400				65.48
TRUE	High	Master Protein	O43310	CBP80/20-dependent translation initiation factor OS=Homo sapiens OX=9606 GN=CTIF PE=1 SV=1	0	FALSE	9.587	5	2	2	2	1	598	67.5	6.54	5.88	2	metabolic process;regulation of biological process	cytoplasm;cytosol	protein binding;RNA binding	Pf02854	9811	ENSG00000282825.1; ENSG00000134030.13	CTIF	18; CHR_HG2213_PATCH			0	100	100	0.01	0.01		4.12715e-16	3.81902e-16	3.26911e-16	3.05343e-16								325.8	74.2			82.33
TRUE	High	Master Protein	Q70E73	Ras-associated and pleckstrin homology domains-containing protein 1 OS=Homo sapiens OX=9606 GN=RAPH1 PE=1 SV=3	0.001	FALSE	5.319	3	2	3	2	1	1250	135.2	8.85	2.44	2	cell growth;regulation of biological process;response to stimulus	cytoplasm;cytoskeleton;cytosol;membrane	protein binding	Pf00169, Pf00788	65059	ENSG00000173166.17	RAPH1	2			0	100	100	1.033	1.465	100	4.12715e-16	3.81902e-16	0.999922	0.885412	3.35161e-16			16.91	8.13			146.1	103	150.9		16.92
TRUE	High	Master Protein	Q8WUB8	PHD finger protein 10 OS=Homo sapiens OX=9606 GN=PHF10 PE=1 SV=3	0	FALSE	7.955	6	2	3	2	1	498	56	6.62	2.46	2	metabolic process;regulation of biological process	nucleus	metal ion binding;protein binding	Pf00628, Pf13831	55274	ENSG00000130024.14	PHF10	6			0	100	100	0.01	0.01		4.12715e-16	3.81902e-16	3.26911e-16	3.05343e-16								227.3	172.7
TRUE	High	Master Protein	Q9BVS5	tRNA (adenine(58)-N(1))-methyltransferase, mitochondrial OS=Homo sapiens OX=9606 GN=TRMT61B PE=1 SV=2	0	FALSE	6.862	9	2	2	2	1	477	52.9	6.62	2.48	2	cell organization and biogenesis;metabolic process	mitochondrion;organelle lumen	catalytic activity;protein binding	Pf08704	55006	ENSG00000171103.10	TRMT61B	2			0	100	100	1.979	3.325	100	4.12715e-16	3.81902e-16	0.417938	0.0690457	3.35161e-16			0	0			111.9	66.6	221.5
TRUE	High	Master Protein	Q9NVH6	Trimethyllysine dioxygenase, mitochondrial OS=Homo sapiens OX=9606 GN=TMLHE PE=1 SV=1	0.002	FALSE	5.044	6	2	3	2	1	421	49.5	7.72	4.86	2	metabolic process;regulation of biological process	mitochondrion;organelle lumen	catalytic activity;metal ion binding	Pf02668	55217	ENSG00000185973.10	TMLHE	X	Lysine degradation		0	100	100	8.539	4.457	100	4.12715e-16	3.81902e-16	2.44947e-07	0.000164171	3.35161e-16			111.77	188.14			34.9	66.9	298.2		80.6
TRUE	High	Master Protein	Q15582	Transforming growth factor-beta-induced protein ig-h3 OS=Homo sapiens OX=9606 GN=TGFBI PE=1 SV=1	0	FALSE	25.026	12	6	8	6	1	683	74.6	7.71	20.95	6	cell differentiation;cell organization and biogenesis;cell proliferation;metabolic process;regulation of biological process;response to stimulus	extracellular;membrane	protein binding	Pf02469, Pf07546	7045	ENSG00000120708.16	TGFBI	5			0	100		3.124	100	100	4.12715e-16		1.55225e-07	3.05343e-16	3.35161e-16			64.14				89.4		310.6		26.18
TRUE	High	Master Protein	Q6ZSR9	Uncharacterized protein FLJ45252 OS=Homo sapiens OX=9606 PE=2 SV=2	0	FALSE	8.793	8	2	2	2	1	355	38	5.26	4.1	2				Pf15282							0	100		0.923	100	100	4.12715e-16		0.988797	3.05343e-16	3.35161e-16			0				208.1		191.9
TRUE	High	Master Protein	P02452	Collagen alpha-1(I) chain OS=Homo sapiens OX=9606 GN=COL1A1 PE=1 SV=5	0	FALSE	11.056	3	3	5	3	1	1464	138.9	5.8	12.68	3	cell communication;cell differentiation;cell organization and biogenesis;cellular component movement;coagulation;metabolic process;regulation of biological process;response to stimulus;transport	cytoplasm;endoplasmic reticulum;extracellular;Golgi;organelle lumen	metal ion binding;protein binding;structural molecule activity	Pf00093, Pf01391, Pf01410	1277		COL1A1	17	Amoebiasis; Protein digestion and absorption; AGE-RAGE signaling pathway in diabetic complications; Focal adhesion; ECM-receptor interaction; PI3K-Akt signaling pathway; Platelet activation	Focal Adhesion-PI3K-Akt-mTOR-signaling pathway; Inflammatory Response Pathway; Focal Adhesion; miR-509-3p alteration of YAP1/ECM axis; Senescence and Autophagy in Cancer; Osteoblast Signaling	0	100	100	1.388	3.659	100	4.12715e-16	3.81902e-16	0.863572	0.000253927	3.35161e-16			34.13	24.81			139.9	45.9	214.2		56.81
TRUE	High	Master Protein	O15321	Transmembrane 9 superfamily member 1 OS=Homo sapiens OX=9606 GN=TM9SF1 PE=2 SV=2	0	FALSE	8.262	6	2	2	2	1	606	68.8	7.17	6.6	2	metabolic process	membrane;vacuole		Pf02990	10548	ENSG00000100926.14	TM9SF1	14			0	100	100	16.575	14.43	100	4.12715e-16	3.81902e-16	7.18366e-14	3.05343e-16	3.35161e-16			134.79	134.98			21.4	24.5	354.1		23.39
TRUE	High	Master Protein	Q01995	Transgelin OS=Homo sapiens OX=9606 GN=TAGLN PE=1 SV=4	0	FALSE	11.897	16	3	3	3	1	201	22.6	8.84	7.88	3	cell differentiation	cytoplasm	protein binding	Pf00307, Pf00402	6876	ENSG00000149591.16	TAGLN	11			0	100	100	2.55	0.926	100	4.12715e-16	3.81902e-16	0.1206	0.904066	3.35161e-16			2.26	44.94			48.4	228.1	123.5
TRUE	High	Master Protein	Q9NZM3	Intersectin-2 OS=Homo sapiens OX=9606 GN=ITSN2 PE=1 SV=3	0.001	FALSE	6.379	2	3	5	3	1	1697	193.3	8.12	1.71	3	cell differentiation;regulation of biological process;transport	cytoplasm	metal ion binding;protein binding	Pf00018, Pf00168, Pf00621, Pf07653, Pf12763, Pf14604	50618	ENSG00000198399.14	ITSN2	2			0	100		1.504	100	100	4.12715e-16		0.754832	3.05343e-16	3.35161e-16			1.48				159.7		240.3
TRUE	High	Master Protein	O95429	BAG family molecular chaperone regulator 4 OS=Homo sapiens OX=9606 GN=BAG4 PE=1 SV=1	0	FALSE	9.784	6	2	3	2	1	457	49.6	5.12	9.53	2	cell organization and biogenesis;metabolic process;regulation of biological process;response to stimulus	cytoplasm;cytosol;membrane;nucleus	enzyme regulator activity;nucleotide binding;protein binding;RNA binding;signal transducer activity	Pf02179	9530	ENSG00000156735.10	BAG4	8	TNF signaling pathway	Oxidative Damage	0	5.171	1.322	0.503	1.143	1.326	4.12715e-16	0.82333	0.0113593	0.992296	0.885262	32.95	29.13	31.53	0	16.1	61.6	228.6	52.3	57.5	15.36	64.67
TRUE	High	Master Protein	O60921	Checkpoint protein HUS1 OS=Homo sapiens OX=9606 GN=HUS1 PE=1 SV=1	0	FALSE	7.18	12	2	2	2	1	280	31.7	6.84	5.11	2	metabolic process;regulation of biological process;response to stimulus	cytoplasm;cytosol;nucleus	protein binding	Pf04005	3364	ENSG00000136273.11	HUS1	7		ATR Signaling	0	4.215	2.782	0.01	0.01	0.01	7.40377e-06	0.0638956	3.26911e-16	3.05343e-16	3.35161e-16	129.33	87.35				50	210.8	139.1			92.96
TRUE	High	Master Protein	Q9HB90	Ras-related GTP-binding protein C OS=Homo sapiens OX=9606 GN=RRAGC PE=1 SV=1	0	FALSE	20.13	9	3	9	3	1	399	44.2	5.1	19.72	3	cell communication;cell death;cell growth;metabolic process;regulation of biological process;response to stimulus	cytoplasm;cytosol;nucleus;vacuole	catalytic activity;metal ion binding;nucleotide binding;protein binding	Pf00025, Pf04670	64121	ENSG00000116954.7	RRAGC	1	mTOR signaling pathway	Target Of Rapamycin (TOR) Signaling	0	3.814	4.024	0.953	0.903	3.278	2.14064e-06	0.00376323	0.988797	0.86499	0.0656706	15.69	43.1	35.57	44.32	43.19	25.9	124	117.5	132.5	23.58	17.83
TRUE	High	Master Protein	O60476	Mannosyl-oligosaccharide 1,2-alpha-mannosidase IB OS=Homo sapiens OX=9606 GN=MAN1A2 PE=1 SV=1	0	FALSE	16.415	9	4	4	4	1	641	73	7.61	10.47	4	metabolic process	endoplasmic reticulum;Golgi;membrane	catalytic activity;metal ion binding	Pf01532	10905	ENSG00000198162.12	MAN1A2	1	N-Glycan biosynthesis; Protein processing in endoplasmic reticulum; Metabolic pathways		0	3.44	1.057	0.331	0.969	1.259	9.10844e-13	0.975783	0.000851974	0.927484	0.925118	58.56	19.17	4.97	87.23	20.22	77.9	123.4	109.6	89.1	10.78	55.29
TRUE	High	Master Protein	Q8N5D0	WD and tetratricopeptide repeats protein 1 OS=Homo sapiens OX=9606 GN=WDTC1 PE=1 SV=2	0	FALSE	8.681	5	3	3	3	1	677	75.9	7.27	1.97	3	cell organization and biogenesis;cellular homeostasis;metabolic process;regulation of biological process;response to stimulus	cytosol;nucleus	enzyme regulator activity;protein binding	Pf00400, Pf00515, Pf12895, Pf13414, Pf13424, Pf13432, Pf14559	23038	ENSG00000142784.15	WDTC1	1			0	3.374	3.232	1.325	1.255	0.953	8.38999e-05	0.0168592	0.948365	0.95457	0.987913	66.45	92.45	16.84	35.62	0	44.9	89.8	238.1	27.2	103.99	89.55
TRUE	High	Master Protein	P07093	Glia-derived nexin OS=Homo sapiens OX=9606 GN=SERPINE2 PE=1 SV=1	0	FALSE	95.724	53	14	51	14	1	398	44	9.29	159.44	14	cell differentiation;cell organization and biogenesis;coagulation;development;regulation of biological process;response to stimulus;transport	cytosol;extracellular	enzyme regulator activity;protein binding	Pf00079	5270	ENSG00000135919.12	SERPINE2	2			0	3.365	0.69	0.972	6.442	3.48	4.12715e-16	0.703197	0.985712	3.05343e-16	1.4859e-10	79.55	26.94	126.92	116.02	138.66	30.6	186.1	24.7	158.6	33.28	17.47
TRUE	High	Master Protein	Q9Y5L3	Ectonucleoside triphosphate diphosphohydrolase 2 OS=Homo sapiens OX=9606 GN=ENTPD2 PE=1 SV=1	0	FALSE	11.176	8	2	5	2	1	495	53.6	8.27	17.9	2	metabolic process;regulation of biological process;response to stimulus	endoplasmic reticulum;membrane	catalytic activity;nucleotide binding	Pf01150	954	ENSG00000054179.11	ENTPD2	9	Purine metabolism; Taste transduction		0	2.78	0.989	0.035	0.071	0.314	0.00130215	0.999876	3.26911e-16	3.05343e-16	0.036717	105.84	130.09	0.06	0.25	7.9	65	92.9	221.1	20.9	118.48	128.17
TRUE	High	Master Protein	P35527	Keratin, type I cytoskeletal 9 OS=Homo sapiens OX=9606 GN=KRT9 PE=1 SV=3	0	FALSE	83.279	33	14	22	13	1	623	62	5.24	68.84	14	cell death;cell organization and biogenesis	cytosol;membrane;nucleus	structural molecule activity	Pf00038, Pf13166	3857	ENSG00000171403.9	KRT9	17			0	2.686	0.922	0.823	1.421	1.521	4.12715e-16	0.999876	0.702988	0.481399	0.307665	122.57	87.33	77.49	65.37	84.54	91.4	161.5	54	93.1	80.01	102.54
TRUE	High	Master Protein	Q9NX24	H/ACA ribonucleoprotein complex subunit 2 OS=Homo sapiens OX=9606 GN=NHP2 PE=1 SV=1	0	FALSE	14.357	50	3	3	3	1	153	17.2	8.22	9.74	3	cell organization and biogenesis;metabolic process	nucleus	protein binding;RNA binding	Pf01248	55651	ENSG00000145912.8	NHP2	5	Ribosome biogenesis in eukaryotes		0	2.657	1.395	0.409	0.657	0.698	3.76314e-10	0.732969	0.000373596	0.311495	0.715295	81.5	85.71	0	48.71	20.72	70.7	205	75	49.3	59.72
TRUE	High	Master Protein	Q9BU23	Lipase maturation factor 2 OS=Homo sapiens OX=9606 GN=LMF2 PE=1 SV=2	0	FALSE	16.551	7	3	5	3	1	707	79.6	10.1	16.75	3	metabolic process	endoplasmic reticulum;membrane	protein binding	Pf06762	91289	ENSG00000100258.17	LMF2	22			0	2.601	1.323	0.674	1.24	1.657	6.0224e-05	0.798913	0.60371	0.945768	0.634558	12.27	41.81	9.07	57.82	8.56	66.8	88.4	132.8	112	40.9	60.51
TRUE	High	Master Protein	Q9NZ52	ADP-ribosylation factor-binding protein GGA3 OS=Homo sapiens OX=9606 GN=GGA3 PE=1 SV=1	0	FALSE	17.922	6	3	8	2	1	723	78.3	5.58	14.5	3	metabolic process;regulation of biological process;transport	endosome;Golgi;membrane	protein binding	Pf00790, Pf02883, Pf03127	23163	ENSG00000125447.16	GGA3	17	Lysosome		0	2.557	2.902	1.729	1.721	4.994	0.000406733	0.00789278	0.456728	0.443187	2.49267e-06	108.91	73.42	78.09	53.28	95.07	52	67.3	103.2	177.6	53.04	112.36
TRUE	High	Master Protein	Q15542	Transcription initiation factor TFIID subunit 5 OS=Homo sapiens OX=9606 GN=TAF5 PE=1 SV=3	0	FALSE	11.965	6	2	2	2	1	800	86.8	5.64	7.97	2	cell organization and biogenesis;metabolic process;regulation of biological process	cytoskeleton;nucleus	catalytic activity;DNA binding;protein binding	Pf00400, Pf04494, Pf08662	6877	ENSG00000148835.10	TAF5	10	Basal transcription factors; Herpes simplex infection	Eukaryotic Transcription Initiation	0	2.508	0.01	0.398	100	0.998	0.00196719	3.81902e-16	0.0275327	3.05343e-16	0.985678	25.74		3.47		0	88.8	222.7		88.6		42.24
TRUE	High	Master Protein	Q6IA69	Glutamine-dependent NAD(+) synthetase OS=Homo sapiens OX=9606 GN=NADSYN1 PE=1 SV=3	0	FALSE	9.518	6	2	3	2	1	706	79.2	6.44	9.6	2	metabolic process	cytoplasm;cytosol	catalytic activity;nucleotide binding;protein binding	Pf00795, Pf02540	55191	ENSG00000172890.11	NADSYN1	11	Nicotinate and nicotinamide metabolism; Metabolic pathways	NAD Biosynthesis II (from tryptophan); NAD+ biosynthetic pathways	0	2.46	2.039	0.643	0.62	1.209	0.00359657	0.327678	0.576175	0.213239	0.969017	18.57	54.91	25.36	26.01	55.14	55.9	99.7	140.2	104.2	8.22	49.97
TRUE	High	Master Protein	Q15583	Homeobox protein TGIF1 OS=Homo sapiens OX=9606 GN=TGIF1 PE=1 SV=3	0	FALSE	11.647	15	3	6	3	1	401	43	8.92	2.39	3	development;metabolic process;regulation of biological process;response to stimulus	nucleus	DNA binding;protein binding	Pf05920	7050	ENSG00000177426.20	TGIF1	18	TGF-beta signaling pathway	Tgif disruption of Shh signaling; TGF-beta Signaling Pathway; TGF-beta Receptor Signaling; Androgen receptor signaling pathway	0	2.441	1.448	0.946	1.06	2.423	0.00105145	0.777075	0.988797	0.98366	0.284442	105.45	120.22	56.54	114.71	98.21	39	142.8	99.8	118.4	104.63	2.23
TRUE	High	Master Protein	Q9UM22	Mammalian ependymin-related protein 1 OS=Homo sapiens OX=9606 GN=EPDR1 PE=1 SV=2	0	FALSE	8.753	9	2	4	2	1	224	25.4	6.6	10.61	2		extracellular;vacuole	metal ion binding	Pf00811	54749	ENSG00000086289.11	EPDR1	7			0	2.382	2.868	1.435	0.876	3.833	0.0041599	0.0126788	0.811381	0.849598	0.0050931	68.67	41.75	37.94	14.91	59.09	40	98.9	112	149.1	80.53	7.47
TRUE	High	Master Protein	O75676	Ribosomal protein S6 kinase alpha-4 OS=Homo sapiens OX=9606 GN=RPS6KA4 PE=1 SV=1	0	FALSE	12.473	4	3	10	2	1	772	85.6	8.28	16.83	3	cell organization and biogenesis;defense response;metabolic process;regulation of biological process;response to stimulus	cytoplasm;cytosol;nucleus	catalytic activity;metal ion binding;nucleotide binding;protein binding	Pf00069, Pf00433, Pf01163, Pf01636, Pf07714, Pf14531	8986	ENSG00000162302.12	RPS6KA4	11	TNF signaling pathway; MAPK signaling pathway	Angiopoietin Like Protein 8 Regulatory Pathway; Insulin Signaling; Interferon type I signaling pathways	0	2.336	1.531	1.14	1.477	4.419	0.000664041	0.592476	0.989011	0.768587	0.00124957	96.44	28.97	87.01	97.48	72.39	31.2	155.9	70.2	142.7	73.46	70.42
TRUE	High	Master Protein	Q8NBT2	Kinetochore protein Spc24 OS=Homo sapiens OX=9606 GN=SPC24 PE=1 SV=2	0	FALSE	28.939	32	3	9	3	1	197	22.5	4.7	34.34	3	cell division;cell organization and biogenesis	chromosome;cytosol;nucleus	protein binding	Pf08286	147841		SPC24	19			0	2.276	1.522	0.592	0.57	0.835	0.00809781	0.689979	0.527118	0.237143	0.929578	124.46	110.04	40.65	29.49	87.66	66.3	179	110.6	44.1	41.56	61.87
TRUE	High	Master Protein	Q58FF6	Putative heat shock protein HSP 90-beta 4 OS=Homo sapiens OX=9606 GN=HSP90AB4P PE=5 SV=1	0	FALSE	67.899	14	9	283	2	1	505	58.2	4.73	643.76	9	metabolic process;response to stimulus	cytoplasm	nucleotide binding;protein binding	Pf00183, Pf02518, Pf13589	664618		HSP90AB4P	15			0	2.27	1.053	2.375	5.119	5.392	0.00992387	0.975783	0.018734	1.56955e-09	1.35814e-07	0	0	0	0	0	41.2	93.5	43.4	222
TRUE	High	Master Protein	P21709	Ephrin type-A receptor 1 OS=Homo sapiens OX=9606 GN=EPHA1 PE=1 SV=4	0	FALSE	11.771	3	2	3	2	1	976	108.1	6.64	7.96	2	cell organization and biogenesis;metabolic process;regulation of biological process;response to stimulus	membrane	catalytic activity;nucleotide binding;protein binding;receptor activity;signal transducer activity	Pf00041, Pf00069, Pf00536, Pf01108, Pf01404, Pf07647, Pf07714, Pf09294, Pf14575	2041	ENSG00000146904.8	EPHA1	7	Axon guidance		0	2.188	1.236	0.848	1.25	1.545	0.0527022	0.87874	0.961261	0.987612	0.804817	65.45	35.93	48.23	73.19	91.38	69.5	137.1	85.9	107.4	36.04	62.21
TRUE	High	Master Protein	Q9Y5K8	V-type proton ATPase subunit D OS=Homo sapiens OX=9606 GN=ATP6V1D PE=1 SV=1	0	FALSE	14.863	16	3	8	3	1	247	28.2	9.36	22.68	3	cell organization and biogenesis;cellular homeostasis;regulation of biological process;response to stimulus;transport	cytosol;membrane	catalytic activity;protein binding;transporter activity	Pf01813	51382	ENSG00000100554.11	ATP6V1D	14	Phagosome; mTOR signaling pathway; Oxidative phosphorylation; Vibrio cholerae infection; Metabolic pathways; Epithelial cell signaling in Helicobacter pylori infection; Collecting duct acid secretion; Synaptic vesicle cycle; Rheumatoid arthritis		0	2.123	0.919	0.761	0.818	1.351	0.000789542	0.999876	0.750194	0.705597	0.879258	78.05	50.44	77.74	39.43	120.29	61.7	153.2	60	125.1	22.24	54.8
TRUE	High	Master Protein	Q8NBM4	Ubiquitin-associated domain-containing protein 2 OS=Homo sapiens OX=9606 GN=UBAC2 PE=1 SV=1	0	FALSE	12.617	8	2	7	2	1	344	38.9	9.01	18.14	2		endoplasmic reticulum;membrane	catalytic activity;protein binding	Pf00627	337867	ENSG00000134882.15	UBAC2	13			0	2.065	1.083	0.814	1.594	1.833	2.86596e-06	0.961568	0.668945	0.13651	0.0934959	88.45	112.71	33.12	67.23	84.39	37.7	191.7	48.6	122	91.26	61.99
TRUE	High	Master Protein	Q5C9Z4	Nucleolar MIF4G domain-containing protein 1 OS=Homo sapiens OX=9606 GN=NOM1 PE=1 SV=1	0	FALSE	15.027	6	3	3	3	1	860	96.2	8.1	8.77	3	cell differentiation	nucleus	protein binding;RNA binding	Pf02847, Pf02854	64434	ENSG00000146909.7	NOM1	7			0	2.042	1.047	0.437	0.83	1.077	0.000180655	0.980861	0.0306161	0.741151	0.998399	72.19	75.92	19.17	60.17	82.9	56.9	246.7	83.9	12.5	67.17	57.06
TRUE	High	Master Protein	P02751	Fibronectin OS=Homo sapiens OX=9606 GN=FN1 PE=1 SV=4	0	FALSE	62.439	7	9	24	9	1	2386	262.5	5.71	81.71	9	cell differentiation;cell organization and biogenesis;cellular component movement;defense response;metabolic process;regulation of biological process;response to stimulus;transport	extracellular;membrane;organelle lumen	enzyme regulator activity;protein binding	Pf00039, Pf00040, Pf00041	2335	ENSG00000115414.18	FN1	2	Amoebiasis; Pathways in cancer; AGE-RAGE signaling pathway in diabetic complications; Focal adhesion; Proteoglycans in cancer; Regulation of actin cytoskeleton; Bacterial invasion of epithelial cells; Small cell lung cancer; ECM-receptor interaction; PI3K-Akt signaling pathway	miR-509-3p alteration of YAP1/ECM axis; TGF-B Signaling in Thyroid Cells for Epithelial-Mesenchymal Transition; Simplified Interaction Map Between LOXL4 and Oxidative Stress Pathway; Overview of nanoparticle effects; Senescence and Autophagy in Cancer; TGF-beta Signaling Pathway; Regulation of Actin Cytoskeleton; Focal Adhesion-PI3K-Akt-mTOR-signaling pathway; Association Between Physico-Chemical…	0	2.04	0.628	1.745	7.55	6.953	3.61903e-07	0.848766	0.0250615	3.05343e-16	3.35161e-16	113.85	16.61	34.67	40.76	38.81	12.2	136	10.4	241.4	83.48	42.88
TRUE	High	Master Protein	P04049	RAF proto-oncogene serine/threonine-protein kinase OS=Homo sapiens OX=9606 GN=RAF1 PE=1 SV=1	0	FALSE	15.897	9	3	7	2	1	648	73	9.2	17.49	3	cell death;cell differentiation;cell organization and biogenesis;cell proliferation;cellular homeostasis;development;metabolic process;regulation of biological process;response to stimulus;transport	cytoplasm;cytosol;Golgi;membrane;mitochondrion;nucleus	catalytic activity;metal ion binding;nucleotide binding;protein binding;signal transducer activity	Pf00069, Pf00130, Pf02196, Pf07714, Pf14531	5894	ENSG00000132155.11	RAF1	3	Serotonergic synapse; T cell receptor signaling pathway; Vascular smooth muscle contraction; Hepatitis B; Insulin signaling pathway; Central carbon metabolism in cancer; Pancreatic cancer; FoxO signaling pathway; Prolactin signaling pathway; MicroRNAs in cancer; Phospholipase D signaling pathway; cGMP-PKG signaling pathway; Chronic myeloid leukemia; Neurotrophin signaling pathway; B cell receptor…	Kit receptor signaling pathway; Association Between Physico-Chemical Features and Toxicity Associated Pathways; TNF related weak inducer of apoptosis (TWEAK) Signaling Pathway; TNF alpha Signaling Pathway; Common Pathways Underlying Drug Addiction; Leptin signaling pathway; IL-5 Signaling Pathway; Signaling Pathways in Glioblastoma; MicroRNAs in cardiomyocyte hypertrophy; Regulation of Actin Cyto…	0	2.035	1.641	0.884	1.251	1.809	0.0203866	0.62546	0.965826	0.95457	0.696961	28.5	55.73	13.06	31.91	29.28	63.8	129.8	91.7	114.7	64.72
TRUE	High	Master Protein	Q9NZI7	Upstream-binding protein 1 OS=Homo sapiens OX=9606 GN=UBP1 PE=1 SV=1	0	FALSE	17.404	9	3	10	2	1	540	60.5	6.35	39.7	3	metabolic process;regulation of biological process	cytosol;nucleus	DNA binding	Pf04516	7342	ENSG00000153560.11	UBP1	3			0	2.004	1.775	0.239	0.312	0.553	0.082608	0.487024	0.00152366	0.000947916	0.553815	49.49	0	13.26	39.14	123.35	75	150.3	133.2	41.5		56.94
TRUE	High	Master Protein	Q969M7	NEDD8-conjugating enzyme UBE2F OS=Homo sapiens OX=9606 GN=UBE2F PE=1 SV=1	0	FALSE	11.324	18	2	7	2	1	185	21.1	6.79	18.82	2	metabolic process	cytoplasm;cytosol	catalytic activity;nucleotide binding;protein binding	Pf00179	140739	ENSG00000184182.18	UBE2F	2	Ubiquitin mediated proteolysis	Cell Cycle	0	0.497	0.622	1.464	1.044	0.721	0.000854899	0.784849	0.660511	0.972721	0.661411	19.23	6.3	72.23	38.09	39.5	143.1	43.7	54.7	158.5	11.89	98.74
TRUE	High	Master Protein	O43688	Phospholipid phosphatase 2 OS=Homo sapiens OX=9606 GN=PLPP2 PE=1 SV=1	0	FALSE	11.92	10	2	5	2	1	288	32.6	8.35	17.27	2	metabolic process;regulation of biological process;response to stimulus	membrane	catalytic activity;protein binding	Pf01569	8612	ENSG00000141934.9	PPAP2C; PLPP2	19	Fat digestion and absorption; Ether lipid metabolism; Phospholipase D signaling pathway; Glycerolipid metabolism; Sphingolipid metabolism; Choline metabolism in cancer; Glycerophospholipid metabolism; Fc gamma R-mediated phagocytosis; Metabolic pathways	Triacylglyceride Synthesis	0	0.49	0.382	0.599	1.096	0.293	0.0659519	0.0911124	0.581002	0.999666	0.0245101	10.6	1.46	17.02	56.62	8.26	114.5	56.1	195.9	33.6	129.67	134.77
TRUE	High	Master Protein	P18859	ATP synthase-coupling factor 6, mitochondrial OS=Homo sapiens OX=9606 GN=ATP5PF PE=1 SV=1	0	FALSE	19.26	41	3	15	3	1	108	12.6	9.52	45.62	3	cell organization and biogenesis;metabolic process;transport	membrane;mitochondrion	catalytic activity;transporter activity	Pf05511	522	ENSG00000154723.12	ATP5J	21	Huntington's disease; Parkinson's disease; Alzheimer's disease; Oxidative phosphorylation; Metabolic pathways	Oxidative phosphorylation; Electron Transport Chain	0	0.489	0.462	0.82	0.99	0.403	4.241e-08	0.049659	0.869193	0.952464	0.00176649	22.56	17.31	50.84	57.42	13.03	212.8	71.8	54.2	61.3	56.64	56.06
TRUE	High	Master Protein	P07919	Cytochrome b-c1 complex subunit 6, mitochondrial OS=Homo sapiens OX=9606 GN=UQCRH PE=1 SV=2	0	FALSE	25.32	48	2	10	2	1	91	10.7	4.44	39.07	2	metabolic process;transport	membrane;mitochondrion	catalytic activity;protein binding;transporter activity	Pf02320	7388	ENSG00000173660.11	UQCRH	1	Huntington's disease; Parkinson's disease; Alzheimer's disease; Oxidative phosphorylation; Non-alcoholic fatty liver disease (NAFLD); Metabolic pathways; Cardiac muscle contraction	Electron Transport Chain	0	0.488	0.609	1.501	1.027	0.626	1.12111e-05	0.455702	0.600765	0.945532	0.298294	18.18	23.19	85.33	23.55	24.23	124.9	54	118.6	102.5	105.13	68.22
TRUE	High	Master Protein	P08133	Annexin A6 OS=Homo sapiens OX=9606 GN=ANXA6 PE=1 SV=3	0	FALSE	190.592	58	33	165	33	1	673	75.8	5.6	443.25	33	cell organization and biogenesis;cellular homeostasis;regulation of biological process;response to stimulus;transport	cytoplasm;membrane;mitochondrion	metal ion binding;nucleotide binding;protein binding;transporter activity	Pf00191	309	ENSG00000197043.13	ANXA6	5		Calcium Regulation in the Cardiac Cell; Prostaglandin Synthesis and Regulation	0	0.471	0.927	1.141	0.695	0.549	4.12715e-16	0.999876	0.93654	0.00105491	0.00638131	19.3	70.73	98.67	48.01	24.18	178.3	56.1	94.1	71.5	46.53	104.02
TRUE	High	Master Protein	Q15041	ADP-ribosylation factor-like protein 6-interacting protein 1 OS=Homo sapiens OX=9606 GN=ARL6IP1 PE=1 SV=2	0	FALSE	25.937	19	2	37	2	1	203	23.3	9.32	74.76	2	cell death;cell organization and biogenesis;regulation of biological process;transport	cytoplasm;cytosol;endoplasmic reticulum;membrane	protein binding	Pf02453	23204	ENSG00000170540.14	ARL6IP1	16			0	0.47	0.798	1.243	0.873	0.714	4.08173e-08	0.941119	0.829104	0.435784	0.611121	27.89	21.23	45.12	44.01	38.65	125.5	84.5	95.9	94.1	21.99	80.59
TRUE	High	Master Protein	Q9NRD1	F-box only protein 6 OS=Homo sapiens OX=9606 GN=FBXO6 PE=1 SV=1	0	FALSE	9.821	17	2	6	2	1	293	33.9	6.09	17.17	2	metabolic process;response to stimulus	cytoplasm;cytosol	catalytic activity;protein binding	Pf00646, Pf04300, Pf12937	26270	ENSG00000116663.10	FBXO6	1	Protein processing in endoplasmic reticulum		0	0.466	0.507	2.269	3.657	1.056	0.0106746	0.309518	0.0773554	2.91867e-05	0.995752	18.96	0	0.34	0	87.83	126.2	24.3	50	199.5		117.75
TRUE	High	Master Protein	Q562R1	Beta-actin-like protein 2 OS=Homo sapiens OX=9606 GN=ACTBL2 PE=1 SV=2	0	FALSE	84.325	25	10	659	4	1	376	42	5.59	1428.09	10		cytoplasm;cytoskeleton	nucleotide binding;protein binding	Pf00022	345651	ENSG00000169067.3	ACTBL2	5			0	0.466	0.692	4.134	3.005	1.274	1.4025e-06	0.780811	2.16632e-14	1.57977e-12	0.752475	22.34	43.77	140.42	119.53	140.34	91.1	16.8	66.6	225.5	95.77	100.01
TRUE	High	Master Protein	Q9NXU5	ADP-ribosylation factor-like protein 15 OS=Homo sapiens OX=9606 GN=ARL15 PE=1 SV=1	0	FALSE	12.641	23	3	10	3	1	204	22.9	5.63	17.28	3	regulation of biological process;response to stimulus		catalytic activity;nucleotide binding;protein binding;signal transducer activity	Pf00025, Pf00503, Pf08477, Pf09439, Pf13671	54622	ENSG00000185305.10	ARL15	5			0	0.464	1.186	1.305	0.927	0.783	0.00473226	0.90743	0.950941	0.898386	0.88909	3.85	41.09	49.68	59.7	25.69	143.7	30.8	151.8	73.7	38.48	103.69
TRUE	High	Master Protein	P06454	Prothymosin alpha OS=Homo sapiens OX=9606 GN=PTMA PE=1 SV=2	0	FALSE	22.574	14	4	7	4	1	111	12.2	3.78	14.61	4	cell organization and biogenesis;metabolic process	cytosol;nucleus	protein binding		5757	ENSG00000187514.16	PTMA	2	Epstein-Barr virus infection		0	0.462	0.319	0.724	1.755	0.501	0.0808016	0.130951	0.8037	0.844933	0.431732	28.18	9	61.92	80.72	32.22	120.1	187.9	40.1	51.9	152.29	85.91
TRUE	High	Master Protein	Q8NFU3	Thiosulfate:glutathione sulfurtransferase OS=Homo sapiens OX=9606 GN=TSTD1 PE=1 SV=3	0	FALSE	20.149	49	2	14	2	1	115	12.5	6.07	57.25	2	metabolic process	cytoplasm;cytosol;mitochondrion	catalytic activity	Pf00581, Pf14566	100131187	ENSG00000215845.10	TSTD1	1			0	0.46	0.351	1.495	2.178	0.657	7.36471e-08	0.0029397	0.495208	0.0312917	0.370455	24.63	12.91	86	73.95	31.5	208.4	71.7	37	82.9	43.72	109.88
TRUE	High	Master Protein	O00762	Ubiquitin-conjugating enzyme E2 C OS=Homo sapiens OX=9606 GN=UBE2C PE=1 SV=1	0	FALSE	16.205	29	3	10	3	1	179	19.6	7.37	24.31	3	cell division;cell organization and biogenesis;metabolic process;regulation of biological process;transport	cytoplasm;cytosol;membrane	catalytic activity;nucleotide binding;protein binding	Pf00179, Pf05743	11065	ENSG00000175063.16	UBE2C	20	Ubiquitin mediated proteolysis	Gastric Cancer Network 1; Gastric cancer network 2	0	0.438	0.882	1.035	0.987	0.503	6.3905e-09	0.989598	0.999922	0.905478	0.0280618	9.74	60.07	74.62	128.14	24.29	146.4	86.3	82	85.4	47.73	14.12
TRUE	High	Master Protein	P63146	Ubiquitin-conjugating enzyme E2 B OS=Homo sapiens OX=9606 GN=UBE2B PE=1 SV=1	0	FALSE	23.551	45	3	20	2	1	152	17.3	5.01	54.28	3	cell organization and biogenesis;metabolic process;regulation of biological process;response to stimulus	chromosome;cytoplasm;membrane;nucleus	catalytic activity;nucleotide binding;protein binding	Pf00179, Pf14461	7320	ENSG00000119048.7	UBE2B	5	Ubiquitin mediated proteolysis	Proteasome Degradation	1	0.419	0.574	1.292	1.166	0.691	4.91243e-12	0.312959	0.774841	0.961254	0.519734	22.43	17.24	102.97	89.4	26.12	129.1	95.3	79.9	95.7	41.69	83.13
TRUE	High	Master Protein	Q8WV24	Pleckstrin homology-like domain family A member 1 OS=Homo sapiens OX=9606 GN=PHLDA1 PE=1 SV=4	0.001	FALSE	5.638	5	2	12	2	1	401	45	9.89	31.33	2	cell death;metabolic process	cytoplasm;cytosol;nucleus	protein binding		22822	ENSG00000139289.13	PHLDA1	12			0	0.41	0.801	1.053	0.794	0.704	8.72337e-06	0.96071	0.999922	0.689451	0.611121	12.01	35.31	87.7	34.49	34.75	150.7	53.6	109.9	85.8	45.71	96.67
TRUE	High	Master Protein	Q6UWP2	Dehydrogenase/reductase SDR family member 11 OS=Homo sapiens OX=9606 GN=DHRS11 PE=1 SV=1	0	FALSE	7.127	11	2	3	2	1	260	28.3	6.64	6.28	2	metabolic process	extracellular	catalytic activity;nucleotide binding	Pf00106, Pf01370, Pf05368, Pf08659, Pf13460, Pf13561	79154	ENSG00000278535.4; ENSG00000275397.2	DHRS11	17; CHR_HSCHR17_7_CTG4			0	0.395	0.394	0.8	0.801	0.316	3.69223e-05	0.073937	0.933365	0.792527	0.00810908	25.73	25.63	22.77	22.86	12.97	190.1	75	74.9	60	105.2
TRUE	High	Master Protein	Q8N4P3	Guanosine-3',5'-bis(diphosphate) 3'-pyrophosphohydrolase MESH1 OS=Homo sapiens OX=9606 GN=HDDC3 PE=1 SV=3	0	FALSE	10.556	15	2	3	2	1	179	20.3	6.74	9.87	2			catalytic activity;metal ion binding;protein binding	Pf13328	374659	ENSG00000184508.10	HDDC3	15	Purine metabolism		0	0.369	1.542	1.804	1.126	0.619	0.0188125	0.592476	0.569261	0.999666	0.734809	22.46	0	92.3	96.24	69.56	32.7	28.6	279.7	59		134.22
TRUE	High	Master Protein	P25445	Tumor necrosis factor receptor superfamily member 6 OS=Homo sapiens OX=9606 GN=FAS PE=1 SV=1	0	FALSE	7.658	10	2	2	2	1	335	37.7	7.94	4.96	2	cell communication;cell death;cell organization and biogenesis;defense response;development;metabolic process;regulation of biological process;response to stimulus	cell surface;cytosol;extracellular;membrane;mitochondrion	protein binding;receptor activity;signal transducer activity	Pf00020, Pf00531	355	ENSG00000026103.21	FAS	10	Chagas disease (American trypanosomiasis); TNF signaling pathway; Hepatitis B; Allograft rejection; Cytokine-cytokine receptor interaction; Type I diabetes mellitus; MAPK signaling pathway; Natural killer cell mediated cytotoxicity; Pathways in cancer; Apoptosis; Proteoglycans in cancer; Autoimmune thyroid disease; Alzheimer's disease; p53 signaling pathway; Non-alcoholic fatty liver disease (NAF…	DNA Damage Response; Allograft Rejection; MAPK Signaling Pathway; Apoptosis; T-Cell antigen Receptor (TCR) Signaling Pathway; Nanomaterial induced apoptosis; miRNA Regulation of DNA Damage Response; VEGFA-VEGFR2 Signaling Pathway; Apoptosis Modulation by HSP70; Fas Ligand (FasL) pathway and Stress induction of Heat Shock Proteins (HSP) regulation; Adipogenesis; Alzheimers Disease	0	0.367	1.039	2.727	0.962	0.91	0.00690831	0.98159	0.0653025	0.930559	0.969017	17.28	55.95	96.08	47.1	37.44	120.6	44.2	125.4	109.7		92.64
TRUE	High	Master Protein	Q99496	E3 ubiquitin-protein ligase RING2 OS=Homo sapiens OX=9606 GN=RNF2 PE=1 SV=1	0	FALSE	25.211	17	4	19	2	1	336	37.6	6.84	69.61	4	cell death;cell organization and biogenesis;metabolic process;regulation of biological process;response to stimulus	chromosome;cytosol;endosome;membrane;nucleus	catalytic activity;metal ion binding;nucleotide binding;protein binding	Pf00097, Pf11789, Pf13639, Pf13920, Pf13923, Pf14570, Pf14634, Pf14835, Pf15227	6045	ENSG00000121481.10	RNF2	1			0	0.362	1.232	2.894	0.905	1.047	0.000119783	0.870051	0.018734	0.881192	0.995752	11.41	20.13	94.27	3.43	11.47	112.2	40.6	129.7	117.5	10.91	75.88
TRUE	High	Master Protein	O95602	DNA-directed RNA polymerase I subunit RPA1 OS=Homo sapiens OX=9606 GN=POLR1A PE=1 SV=2	0.002	FALSE	5.073	3	2	2	2	1	1720	194.7	7.03	0	2	metabolic process;regulation of biological process	nucleus	catalytic activity;DNA binding;metal ion binding;protein binding	Pf00623, Pf04983, Pf04997, Pf04998, Pf05000	25885	ENSG00000068654.15	POLR1A	2	Purine metabolism; RNA polymerase; Metabolic pathways; Pyrimidine metabolism	Eukaryotic Transcription Initiation	0	0.348	0.803	0.01	0.01	0.01	1.52428e-06	0.961568	3.26911e-16	3.05343e-16	3.35161e-16	8.96	55.87				186	64.8	149.3		69.99	18.87
TRUE	High	Master Protein	Q13332	Receptor-type tyrosine-protein phosphatase S OS=Homo sapiens OX=9606 GN=PTPRS PE=1 SV=3	0	FALSE	8.99	2	2	3	2	1	1948	216.9	6.46	7.7	2	metabolic process;regulation of biological process	membrane	catalytic activity;protein binding	Pf00041, Pf00047, Pf00102, Pf07679, Pf09294, Pf13895, Pf13927, Pf14566	5802	ENSG00000105426.16	PTPRS	19			0	0.323	0.426	0.77	0.772	0.288	1.98126e-07	0.102304	0.903741	0.727711	0.00482242	3.12	5.27	1.24	10.9	2.41	190	72.1	79.8	58.1	25.9	25.66
TRUE	High	Master Protein	Q96C01	Protein FAM136A OS=Homo sapiens OX=9606 GN=FAM136A PE=1 SV=1	0	FALSE	19.496	31	4	12	4	1	138	15.6	7.61	30.5	4		cytoplasm		Pf05811	84908	ENSG00000035141.7	FAM136A	2			0	0.317	0.509	0.939	1.289	0.545	9.61814e-12	0.416001	0.988797	0.964638	0.139766	13.04	29.31	83.86	123.54	27.88	257.8	55.8	21.5	64.8	70.29	90.3
TRUE	High	Master Protein	Q9Y4K3	TNF receptor-associated factor 6 OS=Homo sapiens OX=9606 GN=TRAF6 PE=1 SV=1	0.001	FALSE	6.178	6	2	3	2	1	522	59.5	6.44	6.45	2	cell differentiation;cell organization and biogenesis;metabolic process;regulation of biological process;response to stimulus	cytoplasm;cytosol;membrane;nucleus	catalytic activity;metal ion binding;motor activity;protein binding	Pf00097, Pf00917, Pf01576, Pf02176, Pf13639, Pf13920, Pf13923, Pf15227	7189	ENSG00000175104.14	TRAF6	11	Chagas disease (American trypanosomiasis); Endocytosis; NOD-like receptor signaling pathway; Osteoclast differentiation; Ubiquitin mediated proteolysis; Epstein-Barr virus infection; Neurotrophin signaling pathway; Leishmaniasis; MAPK signaling pathway; Pathways in cancer; NF-kappa B signaling pathway; Tuberculosis; Pertussis; Toxoplasmosis; Measles; Small cell lung cancer; Toll-like receptor sig…	MAPK Signaling Pathway; IL-1 signaling pathway; T-Cell antigen Receptor (TCR) Signaling Pathway; Simplified Depiction of MYD88 Distinct Input-Output Pathway; Toll-like Receptor Signaling; MAPK and NFkB Signalling Pathways Inhibited by Yersinia YopJ; Photodynamic therapy-induced NF-kB survival signaling; Melatonin metabolism and effects; IL17 signaling pathway; EBV LMP1 signaling; Regulation of to…	0	0.316	1.319	0.436	0.17	0.12	2.43685e-12	0.788657	0.126569	1.03785e-10	1.02562e-12	6.1	70.77	7.71	3.6	0.48	190.9	52.4	134	22.8	67.52	37.33
TRUE	High	Master Protein	P06899	Histone H2B type 1-J OS=Homo sapiens OX=9606 GN=HIST1H2BJ PE=1 SV=3	0	FALSE	29.812	27	4	54	2	1	126	13.9	10.32	160.32	4	cell organization and biogenesis;defense response;metabolic process;regulation of biological process;response to stimulus	chromosome;cytosol;membrane;nucleus	DNA binding;protein binding	Pf00125, Pf00808	8970	ENSG00000124635.8	HIST1H2BJ	6	Viral carcinogenesis; Systemic lupus erythematosus; Alcoholism		0	0.299	1.016	0.763	0.737	0.029	4.12715e-16	0.947488	0.754832	0.0352848	3.35161e-16	11.71	46.02	76.12	77.45	0.01	129.2	38.6	173.9	58.2		111.44
TRUE	High	Master Protein	Q93063	Exostosin-2 OS=Homo sapiens OX=9606 GN=EXT2 PE=1 SV=1	0	FALSE	7.481	7	3	3	3	1	718	82.2	6.55	5.33	3	cell differentiation;metabolic process;regulation of biological process;response to stimulus	endoplasmic reticulum;Golgi;membrane	catalytic activity;metal ion binding;protein binding	Pf03016, Pf09258	2132	ENSG00000151348.13	EXT2	11	Glycosaminoglycan biosynthesis - heparan sulfate / heparin; Metabolic pathways	Mesodermal Commitment Pathway	0	0.258	1.268	12.944	0.54	1.218	4.12715e-16	0.806205	3.26911e-16	0.0163924	0.895891	6.04	88.31	117.71	34.2	59.64	174.2	18.6	82.2	124.9	64.19	75.17
TRUE	High	Master Protein	Q9H4Z3	Phosphorylated CTD-interacting factor 1 OS=Homo sapiens OX=9606 GN=PCIF1 PE=1 SV=1	0	FALSE	18.467	9	5	6	5	1	704	80.6	7.42	6.88	5	regulation of biological process	cytoskeleton;nucleus	protein binding	Pf00397, Pf12237	63935	ENSG00000100982.11	PCIF1	20			0	0.25	0.814	1.354	0.464	0.409	2.3283e-09	0.95872	0.933365	0.051659	0.0906587	4.54	69.04	115.84	15.25	14.59	209	36.7	123.3	31.1	82.48	83.32
TRUE	High	Master Protein	Q8WUZ0	B-cell CLL/lymphoma 7 protein family member C OS=Homo sapiens OX=9606 GN=BCL7C PE=1 SV=3	0	FALSE	13.82	38	3	7	3	1	217	23.5	5.2	15.15	3	cell death			Pf04714	9274	ENSG00000099385.11	BCL7C	16			0	0.236	1.597	8.273	5.637	1.948	7.81746e-06	0.545588	1.90879e-07	6.30071e-08	0.564469	1.91	326.42	44.79	0	0	37.3	24.7	134.1	204	109.6	113.75
TRUE	High	Master Protein	P53350	Serine/threonine-protein kinase PLK1 OS=Homo sapiens OX=9606 GN=PLK1 PE=1 SV=1	0	FALSE	7.522	10	3	4	3	1	603	68.2	8.91	0	3	cell division;cell organization and biogenesis;cell proliferation;metabolic process;regulation of biological process;response to stimulus	chromosome;cytoplasm;cytoskeleton;cytosol;nucleus	catalytic activity;metal ion binding;nucleotide binding;protein binding	Pf00069, Pf00659, Pf07714, Pf14531	5347	ENSG00000166851.14	PLK1	16	FoxO signaling pathway; Progesterone-mediated oocyte maturation; Oocyte meiosis; Cell cycle	Regulation of toll-like receptor signaling pathway; Cell Cycle; Integrated Cancer pathway; TNF alpha Signaling Pathway	0	0.01	0.01	100	100	0.512	4.12715e-16	3.81902e-16	3.26911e-16	3.05343e-16	0.414053					1.13	267.2			132.8	29.66
TRUE	High	Master Protein	Q8IX90	Spindle and kinetochore-associated protein 3 OS=Homo sapiens OX=9606 GN=SKA3 PE=1 SV=2	0.002	FALSE	4.956	6	2	3	2	1	412	46.3	5.11	3.38	2	cell division;regulation of biological process	chromosome;cytoplasm;cytoskeleton	protein binding		221150	ENSG00000165480.15	SKA3	13			0	0.01	0.01	100	100	0.886	4.12715e-16	3.81902e-16	3.26911e-16	3.05343e-16	0.969017					20.58	212.1			187.9	24.63
TRUE	High	Master Protein	P54652	Heat shock-related 70 kDa protein 2 OS=Homo sapiens OX=9606 GN=HSPA2 PE=1 SV=1	0	FALSE	107.49	21	13	291	2	1	639	70	5.74	914.65	13	cell differentiation;cell organization and biogenesis;metabolic process;regulation of biological process;response to stimulus	cell surface;cytoplasm;cytoskeleton;cytosol;membrane;mitochondrion;nucleus	nucleotide binding;protein binding	Pf00012, Pf06723	3306	ENSG00000126803.9	HSPA2	14	Endocytosis; Longevity regulating pathway - multiple species; Epstein-Barr virus infection; Spliceosome; MAPK signaling pathway; Protein processing in endoplasmic reticulum; Toxoplasmosis; Measles; Influenza A; Estrogen signaling pathway; Legionellosis; Antigen processing and presentation	Parkin-Ubiquitin Proteasomal System pathway	0	0.01	0.428	100	2.308	0.988	4.12715e-16	0.402991	3.26911e-16	0.202063	0.985678		0		47.11	46	165.5		70.9	163.6
TRUE	High	Master Protein	Q15643	Thyroid receptor-interacting protein 11 OS=Homo sapiens OX=9606 GN=TRIP11 PE=1 SV=3	0	FALSE	8.591	1	2	2	2	1	1979	227.4	5.26	3.01	2	cell differentiation;cell organization and biogenesis;cellular component movement;metabolic process;regulation of biological process;transport	cytoplasm;cytoskeleton;Golgi;membrane;nucleus	protein binding	Pf04111, Pf08317	9321	ENSG00000100815.12	TRIP11	14			0	0.01	0.757	100	1.318	0.998	4.12715e-16	0.962137	3.26911e-16	0.95457	0.993894		0		28.84	28.72	145.2		110	144.9
TRUE	High	Master Protein	O75529	TAF5-like RNA polymerase II p300/CBP-associated factor-associated factor 65 kDa subunit 5L OS=Homo sapiens OX=9606 GN=TAF5L PE=1 SV=1	0	FALSE	7.136	7	2	2	2	1	589	66.1	5.88	0	2	cell organization and biogenesis;metabolic process;regulation of biological process	nucleus	catalytic activity;protein binding	Pf00400, Pf04494, Pf15492	27097	ENSG00000135801.9	TAF5L	1	Basal transcription factors; Herpes simplex infection		0	0.01	0.913	100	1.121	1.024	4.12715e-16	0.999876	3.26911e-16	0.999063	0.993441		0.08		0	0.1	136.2		124.4	139.4	0.09
TRUE	High	Master Protein	Q6UXD5	Seizure 6-like protein 2 OS=Homo sapiens OX=9606 GN=SEZ6L2 PE=1 SV=2	0	FALSE	14.525	5	2	4	2	1	910	97.5	4.89	15.65	2		endoplasmic reticulum;membrane		Pf00084, Pf00431	26470	ENSG00000174938.14	SEZ6L2	16			0	0.01	1.545	100	0.938	1.312	4.12715e-16	0.551713	3.26911e-16	0.905724	0.891873		0		13.04	0	85.3		166.7	148
TRUE	High	Master Protein	P22413	Ectonucleotide pyrophosphatase/phosphodiesterase family member 1 OS=Homo sapiens OX=9606 GN=ENPP1 PE=1 SV=2	0	FALSE	12.635	5	2	2	2	1	925	104.9	7.14	6.52	2	cellular homeostasis;metabolic process;regulation of biological process;response to stimulus;transport	cell surface;extracellular;membrane	catalytic activity;metal ion binding;nucleotide binding;protein binding;receptor activity	Pf01033, Pf01223, Pf01663	5167	ENSG00000197594.11	ENPP1	6	Purine metabolism; Pantothenate and CoA biosynthesis; Starch and sucrose metabolism; Nicotinate and nicotinamide metabolism; Metabolic pathways; Pyrimidine metabolism	Insulin Signaling; Endochondral Ossification	0	0.01	1.851	100	0.842	1.56	4.12715e-16	0.476571	3.26911e-16	0.792527	0.849389		0		0	0	90.7		167.9	141.4
TRUE	High	Master Protein	Q8N8R3	Mitochondrial basic amino acids transporter OS=Homo sapiens OX=9606 GN=SLC25A29 PE=1 SV=2	0	FALSE	10.875	14	3	4	3	1	303	32	8.75	8.78	3	transport	membrane;mitochondrion	transporter activity	Pf00153	123096	ENSG00000197119.12	SLC25A29	14			0	0.01	1.227	100	0.79	0.97	4.12715e-16	0.879451	3.26911e-16	0.743844	0.990529		41.5		11.33	34.53	125.1		153.5	121.3	38.12
TRUE	High	Master Protein	Q58FG1	Putative heat shock protein HSP 90-alpha A4 OS=Homo sapiens OX=9606 GN=HSP90AA4P PE=5 SV=1	0	FALSE	37.076	20	5	630	3	1	418	47.7	5.19	2085.72	5	metabolic process;response to stimulus	cytoplasm	nucleotide binding;protein binding	Pf00183, Pf02518, Pf13589	3323		HSP90AA4P	4			0	0.01	0.498		0.01	0.01	4.12715e-16	0.38241		3.05343e-16	3.35161e-16		17.01				267		133
TRUE	High	Master Protein	Q8NDZ4	Divergent protein kinase domain 2A OS=Homo sapiens OX=9606 GN=DIPK2A PE=1 SV=1	0	FALSE	8.02	6	2	2	2	1	430	49.5	8.53	4.2	2	cell proliferation;regulation of biological process	extracellular;Golgi;membrane		Pf12260	205428	ENSG00000181744.8	C3orf58	3			0		100		0.01			3.81902e-16		3.05343e-16									400
[truncated: 15 more columns]
