# Supplementary material for: Mutant KRAS-Associated Proteome Is Mainly Controlled by Exogenous Factors
Source: Cells. 2022 Jun 21;11(13):1988. doi: 10.3390/cells11131988 (PMC9265670; doi:10.3390/cells11131988)
Supplement: Supplementary file 1 [file cells-11-01988-s001.zip › Supplementary file S4_LS174T_siCTRL_FibCM_vs_siCTRL_ctrlCM.xlsx]

## Sheet: Folha1
Checked	Protein FDR Confidence: Combined	Master	Accession	Description	Exp. q-value: Combined	Contaminant	Sum PEP Score	Coverage [%]	# Peptides	# PSMs	# Unique Peptides	# Protein Groups	# AAs	MW [kDa]	calc. pI	Score Sequest HT: Sequest HT	# Peptides (by Search Engine): Sequest HT	Biological Process	Cellular Component	Molecular Function	Pfam IDs	Entrez Gene ID	Ensembl Gene ID	Gene Symbol	Chromosome	KEGG Pathways	WikiPathways	# Razor Peptides	Abundance Ratio: (6_LS174T_siCTRL_FibCM) / (5_LS174T_siCTRL_ctrlCM)	Abundance Ratio: (7_LS174T_siKRAS_ctrlCM) / (5_LS174T_siCTRL_ctrlCM)	Abundance Ratio: (8_LS174T_siKRAS_FibCM) / (6_LS174T_siCTRL_FibCM)	Abundance Ratio: (8_LS174T_siKRAS_FibCM) / (7_LS174T_siKRAS_ctrlCM)	Abundance Ratio: (8_LS174T_siKRAS_FibCM) / (5_LS174T_siCTRL_ctrlCM)	Abundance Ratio Adj. P-Value: (6_LS174T_siCTRL_FibCM) / (5_LS174T_siCTRL_ctrlCM)	Abundance Ratio Adj. P-Value: (7_LS174T_siKRAS_ctrlCM) / (5_LS174T_siCTRL_ctrlCM)	Abundance Ratio Adj. P-Value: (8_LS174T_siKRAS_FibCM) / (6_LS174T_siCTRL_FibCM)	Abundance Ratio Adj. P-Value: (8_LS174T_siKRAS_FibCM) / (7_LS174T_siKRAS_ctrlCM)	Abundance Ratio Adj. P-Value: (8_LS174T_siKRAS_FibCM) / (5_LS174T_siCTRL_ctrlCM)	Abundance Ratio Variability [%]: (6_LS174T_siCTRL_FibCM) / (5_LS174T_siCTRL_ctrlCM)	Abundance Ratio Variability [%]: (7_LS174T_siKRAS_ctrlCM) / (5_LS174T_siCTRL_ctrlCM)	Abundance Ratio Variability [%]: (8_LS174T_siKRAS_FibCM) / (6_LS174T_siCTRL_FibCM)	Abundance Ratio Variability [%]: (8_LS174T_siKRAS_FibCM) / (7_LS174T_siKRAS_ctrlCM)	Abundance Ratio Variability [%]: (8_LS174T_siKRAS_FibCM) / (5_LS174T_siCTRL_ctrlCM)	Abundances (Grouped): 5_LS174T_siCTRL_ctrlCM	Abundances (Grouped): 6_LS174T_siCTRL_FibCM	Abundances (Grouped): 7_LS174T_siKRAS_ctrlCM	Abundances (Grouped): 8_LS174T_siKRAS_FibCM	Abundances (Grouped) CV [%]: 5_LS174T_siCTRL_ctrlCM	Abundances (Grouped) CV [%]: 6_LS174T_siCTRL_FibCM
TRUE	High	Master Protein	P05062	Fructose-bisphosphate aldolase B OS=Homo sapiens OX=9606 GN=ALDOB PE=1 SV=2	0	FALSE	29.154	20	6	18	5	1	364	39.4	7.87	43.04	6	cell organization and biogenesis;metabolic process;regulation of biological process	cytoplasm;cytoskeleton;cytosol	catalytic activity;protein binding	Pf00274	229	ENSG00000136872.17	ALDOB	9	Carbon metabolism; Fructose and mannose metabolism; Pentose phosphate pathway; Glycolysis / Gluconeogenesis; Biosynthesis of amino acids; Metabolic pathways	Glycolysis and Gluconeogenesis; Polyol Pathway	0	100	100	0.01	0.01		4.49643e-16	3.59486e-16	4.24865e-16	3.54689e-16								176.5	223.5
TRUE	High	Master Protein	Q15582	Transforming growth factor-beta-induced protein ig-h3 OS=Homo sapiens OX=9606 GN=TGFBI PE=1 SV=1	0	FALSE	23.558	12	5	8	5	1	683	74.6	7.71	16.73	5	cell differentiation;cell organization and biogenesis;cell proliferation;metabolic process;regulation of biological process;response to stimulus	extracellular;membrane	protein binding	Pf02469, Pf07546	7045	ENSG00000120708.16	TGFBI	5			0	100		0.925	100	100	4.49643e-16		0.703334	3.54689e-16	3.9087e-16			64.99				236.5		163.5		58.71
TRUE	High	Master Protein	O00391	Sulfhydryl oxidase 1 OS=Homo sapiens OX=9606 GN=QSOX1 PE=1 SV=3	0	FALSE	21.362	8	4	6	4	1	747	82.5	8.92	20.97	4	cellular homeostasis;metabolic process;regulation of biological process;transport	extracellular;Golgi;membrane;organelle lumen	catalytic activity	Pf00085, Pf04777, Pf13905	5768	ENSG00000116260.16	QSOX1	1			0	100	100	0.737	1.145	100	4.49643e-16	3.59486e-16	0.240769	0.731136	3.9087e-16			3.04	62.32			85.3	191.4	123.3		32.03
TRUE	High	Master Protein	Q14004	Cyclin-dependent kinase 13 OS=Homo sapiens OX=9606 GN=CDK13 PE=1 SV=2	0	FALSE	21.294	4	4	22	2	1	1512	164.8	9.69	62.09	4	cell division;development;metabolic process;regulation of biological process;transport	chromosome;cytosol;extracellular;Golgi;nucleus	catalytic activity;DNA binding;nucleotide binding;protein binding;RNA binding	Pf00069, Pf07714	8621	ENSG00000065883.14	CDK13	7			0	100	100	1.384	2.523	100	4.49643e-16	3.59486e-16	0.661759	7.66473e-06	3.9087e-16			11.68	88.79			134.2	32.8	233		18.27
TRUE	High	Master Protein	P08253	72 kDa type IV collagenase OS=Homo sapiens OX=9606 GN=MMP2 PE=1 SV=2	0	FALSE	16.092	5	2	3	2	1	660	73.8	5.47	9.26	2	cell differentiation;cell organization and biogenesis;metabolic process;regulation of biological process;response to stimulus	cytoplasm;extracellular;membrane;mitochondrion;nucleus	catalytic activity;metal ion binding;protein binding	Pf00040, Pf00045, Pf00413, Pf01471	4313	ENSG00000087245.12	MMP2	16	Pathways in cancer; AGE-RAGE signaling pathway in diabetic complications; Proteoglycans in cancer; Leukocyte transendothelial migration; Bladder cancer; Endocrine resistance; GnRH signaling pathway; Estrogen signaling pathway	Lung fibrosis; Photodynamic therapy-induced NF-kB survival signaling; Matrix Metalloproteinases; VEGFA-VEGFR2 Signaling Pathway; AGE/RAGE pathway	0	100		0.57	100	100	4.49643e-16		0.0377104	3.54689e-16	3.9087e-16			19.02				254.7		145.3
TRUE	High	Master Protein	P09486	SPARC OS=Homo sapiens OX=9606 GN=SPARC PE=1 SV=1	0	FALSE	13.202	10	2	3	2	1	303	34.6	4.84	10.24	2	cell organization and biogenesis;regulation of biological process;response to stimulus;transport	cell surface;cytoplasm;extracellular;membrane;mitochondrion;nucleus;organelle lumen	metal ion binding;protein binding	Pf00050, Pf07648, Pf09289, Pf10591	6678	ENSG00000113140.10	SPARC	5		Senescence and Autophagy in Cancer; miR-509-3p alteration of YAP1/ECM axis	0	100		3.821	100	100	4.49643e-16		2.79243e-14	3.54689e-16	3.9087e-16			0				59		341
TRUE	High	Master Protein	Q9NVH0	Exonuclease 3'-5' domain-containing protein 2 OS=Homo sapiens OX=9606 GN=EXD2 PE=1 SV=2	0	FALSE	11.065	4	2	2	2	1	621	70.3	8.32	6.03	2	metabolic process;response to stimulus	cytoplasm;nucleus	catalytic activity;protein binding	Pf01612	55218	ENSG00000081177.18	EXD2	14			0	100		0.01			4.49643e-16		4.24865e-16									400
TRUE	High	Master Protein	Q9H6R4	Nucleolar protein 6 OS=Homo sapiens OX=9606 GN=NOL6 PE=1 SV=2	0	FALSE	9.872	3	2	2	2	1	1146	127.5	7.64	5.95	2	metabolic process;transport	chromosome;mitochondrion;nucleus	protein binding;RNA binding	Pf03813	65083	ENSG00000165271.16	NOL6	9	Ribosome biogenesis in eukaryotes		0	100		0.927	100	100	4.49643e-16		0.935102	3.54689e-16	3.9087e-16			55.05				207.6		192.4		15.38
TRUE	High	Master Protein	Q8IWA4	Mitofusin-1 OS=Homo sapiens OX=9606 GN=MFN1 PE=1 SV=3	0	FALSE	9.134	5	3	4	2	1	741	84.1	6.33	6.17	3	cell communication;cell organization and biogenesis;metabolic process;response to stimulus	membrane;mitochondrion	catalytic activity;nucleotide binding;protein binding	Pf00350, Pf01926, Pf04799	55669	ENSG00000171109.18	MFN1	3	NOD-like receptor signaling pathway		0	100	100	0.01	0.01		4.49643e-16	3.59486e-16	4.24865e-16	3.54689e-16								233.1	166.9			30.69
TRUE	High	Master Protein	Q658P3	Metalloreductase STEAP3 OS=Homo sapiens OX=9606 GN=STEAP3 PE=1 SV=2	0.001	FALSE	6.441	5	2	5	2	1	488	54.6	8.6	8.32	2	cell death;metabolic process;regulation of biological process;transport	cytoplasm;endosome;membrane	catalytic activity;metal ion binding;nucleotide binding;protein binding	Pf01210, Pf03446, Pf03807	55240	ENSG00000115107.19	STEAP3	2	p53 signaling pathway	Iron metabolism in placenta; Copper homeostasis	0	100	100	1.044	0.879	100	4.49643e-16	3.59486e-16	0.998862	0.843696	3.9087e-16			50.62	48.62			133.4	154.6	112		17.7
TRUE	High	Master Protein	Q2KHR3	Glutamine and serine-rich protein 1 OS=Homo sapiens OX=9606 GN=QSER1 PE=1 SV=3	0	FALSE	8.688	1	2	2	2	1	1735	189.9	7.08	3.74	2				Pf13926	79832	ENSG00000060749.14	QSER1	11			0	38.357	0.01	0.065	100	2.495	4.49643e-16	3.59486e-16	4.24865e-16	3.54689e-16	0.0466429	13.51		0.15		32.22	9.6	366.6		23.8	12.83
TRUE	High	Master Protein	P07585	Decorin OS=Homo sapiens OX=9606 GN=DCN PE=1 SV=1	0	FALSE	9.474	10	2	5	2	1	359	39.7	8.54	13.79	2	cell organization and biogenesis;metabolic process;regulation of biological process;response to stimulus	cytoplasm;extracellular;organelle lumen	enzyme regulator activity;protein binding;RNA binding	Pf01462, Pf12799, Pf13855	1634	ENSG00000011465.16	DCN	12	TGF-beta signaling pathway; Proteoglycans in cancer	BMP2-WNT4-FOXO1 Pathway in Human Primary Endometrial Stromal Cell Differentiation	0	10.521	2.046	1.352	6.952	14.223	4.49643e-16	0.33832	0.807424	3.54689e-16	3.9087e-16	131.11	0	70.11	32.78	32.78	14.4	151.4	29.4	204.7		89.63
TRUE	High	Master Protein	Q712K3	Ubiquitin-conjugating enzyme E2 R2 OS=Homo sapiens OX=9606 GN=UBE2R2 PE=1 SV=1	0.002	FALSE	4.943	13	3	4	2	1	238	27.1	4.42	1.66	3	metabolic process	cytoplasm;cytosol	catalytic activity;nucleotide binding;protein binding	Pf00179, Pf14461	54926	ENSG00000107341.4	UBE2R2	9	Ubiquitin mediated proteolysis; Herpes simplex infection		1	4.537	2.069	1.173	0.816	1.688	1.20031e-09	0.279193	0.974454	0.866221	0.422045	118.45	138.95	48.37	84.93	140.22	26.2	118.7	104.9	150.2	121.63	20.51
TRUE	High	Master Protein	Q9UBP0	Spastin OS=Homo sapiens OX=9606 GN=SPAST PE=1 SV=1	0	FALSE	17.91	9	3	5	3	1	616	67.2	9.64	14.39	3	cell differentiation;cell division;cell organization and biogenesis;cellular component movement;development;metabolic process;regulation of biological process;response to stimulus;transport	cytoplasm;cytoskeleton;cytosol;endoplasmic reticulum;endosome;membrane;nucleus	catalytic activity;nucleotide binding;protein binding	Pf00004, Pf00437, Pf01078, Pf04212, Pf05496, Pf06068, Pf07724, Pf07728, Pf13401	6683	ENSG00000021574.11	SPAST	2			0	4.513	6.398	0.939	0.837	4.238	6.53274e-10	3.07788e-13	0.899939	0.60759	3.9087e-16	34.27	0	30.23	24.49	0	8.2	37.1	132.6	222.1		31.85
TRUE	High	Master Protein	A2VDF0	Fucose mutarotase OS=Homo sapiens OX=9606 GN=FUOM PE=1 SV=2	0	FALSE	12.463	26	2	2	2	1	154	16.8	5.58	6.72	2	metabolic process;regulation of biological process;response to stimulus	cytosol	catalytic activity	Pf05025	282969	ENSG00000148803.11	FUOM	10			0	3.559	0.01	0.01		0.01	5.22813e-07	3.59486e-16	4.24865e-16		3.9087e-16	255.04					87.7	312.3				122.26
TRUE	High	Master Protein	Q9H446	RWD domain-containing protein 1 OS=Homo sapiens OX=9606 GN=RWDD1 PE=1 SV=1	0	FALSE	10.497	11	2	5	2	1	243	27.9	4.2	18.52	2	metabolic process;regulation of biological process;response to stimulus	cytoplasm	protein binding	Pf05773	51389	ENSG00000111832.12	RWDD1	6			0	3.333	8.285	1.28	0.615	4.268	1.9932e-06	3.59486e-16	0.810463	0.00118446	5.81049e-09	220.35	8.59	113.84	57.06	119.47	21.8	86.7	180.5	111	26.95	124.81
TRUE	High	Master Protein	P02452	Collagen alpha-1(I) chain OS=Homo sapiens OX=9606 GN=COL1A1 PE=1 SV=5	0	FALSE	20.477	4	3	7	3	1	1464	138.9	5.8	12.11	3	cell communication;cell differentiation;cell organization and biogenesis;cellular component movement;coagulation;metabolic process;regulation of biological process;response to stimulus;transport	cytoplasm;endoplasmic reticulum;extracellular;Golgi;organelle lumen	metal ion binding;protein binding;structural molecule activity	Pf00093, Pf01391, Pf01410	1277		COL1A1	17	Amoebiasis; Protein digestion and absorption; AGE-RAGE signaling pathway in diabetic complications; Focal adhesion; ECM-receptor interaction; PI3K-Akt signaling pathway; Platelet activation	Focal Adhesion-PI3K-Akt-mTOR-signaling pathway; Inflammatory Response Pathway; Focal Adhesion; miR-509-3p alteration of YAP1/ECM axis; Senescence and Autophagy in Cancer; Osteoblast Signaling	0	3.318		0.984	3.221	3.264	9.77462e-15		0.934083	3.54689e-16	3.9087e-16	0		84.75	47.24	30.2	24.3	131.5	27.9	216.3		95.37
TRUE	High	Master Protein	Q9NXV2	BTB/POZ domain-containing protein KCTD5 OS=Homo sapiens OX=9606 GN=KCTD5 PE=1 SV=1	0	FALSE	27.014	29	3	8	3	1	234	26.1	6.24	21.21	3	cell organization and biogenesis;metabolic process	cytoplasm;cytosol;nucleus	protein binding	Pf02214	54442	ENSG00000167977.8	KCTD5	16			0	3.276	2.61	0.5	0.698	1.664	1.8301e-10	0.00120665	0.000454289	0.277964	0.30383	40.59	27.17	9.04	28.74	46.21	68.7	146.2	88.9	96.2	24.62	68.62
TRUE	High	Master Protein	Q92796	Disks large homolog 3 OS=Homo sapiens OX=9606 GN=DLG3 PE=1 SV=2	0	FALSE	21.525	7	3	5	2	1	817	90.3	7.03	15.29	3	cell communication;cell organization and biogenesis;metabolic process;regulation of biological process;transport	cytoplasm;cytosol;membrane	catalytic activity;protein binding;transporter activity	Pf00018, Pf00595, Pf00625, Pf07653, Pf10368, Pf10600, Pf13180	1741	ENSG00000082458.11	DLG3	X	Hippo signaling pathway		0	3.089	3.262	0.926	0.928	1.058	5.41164e-12	3.42805e-05	0.886164	0.94221	0.997101	262.12	99.35	41.47	83.05	8.28	72.4	190.7	87.5	49.4
TRUE	High	Master Protein	Q9Y580	RNA-binding protein 7 OS=Homo sapiens OX=9606 GN=RBM7 PE=1 SV=1	0	FALSE	14.132	14	3	4	3	1	266	30.5	9.57	9.23	3	regulation of biological process	nucleus	protein binding;RNA binding	Pf00076, Pf13893, Pf14259	10179	ENSG00000076053.10	RBM7	11			0	3.045	1.584	0.13	0.715	3.133	3.70929e-09	0.560979	4.24865e-16	0.735571	0.00015623	51.99	51.99	1.56	30.14	51.99	106.2	251.3	29.7	12.8	46.8	44.62
TRUE	High	Master Protein	P0DPD7	EEF1A lysine methyltransferase 4 OS=Homo sapiens OX=9606 GN=EEF1AKMT4 PE=1 SV=1	0	FALSE	24.061	21	2	5	2	1	255	28.3	6.05	21.71	2											0	2.668	0.732	0.234	0.915	0.796	1.66962e-07	0.672468	1.39622e-12	0.935664	0.763883	85.31	28.64	1.53	56.93	20.37	106.7	154.3	72.4	66.6	37.33	103.65
TRUE	High	Master Protein	Q96CX6	Leucine-rich repeat-containing protein 58 OS=Homo sapiens OX=9606 GN=LRRC58 PE=1 SV=2	0	FALSE	25.178	16	3	5	3	1	371	40.6	6.84	16.96	3			protein binding	Pf12799, Pf13855	116064	ENSG00000163428.3	LRRC58	3			0	2.562	0.01	1.213	100	3.109	0.000466187	3.59486e-16	0.908499	3.54689e-16	3.39058e-06	0		34.02		0	66.8	111.1		222.1		111.52
TRUE	High	Master Protein	Q15050	Ribosome biogenesis regulatory protein homolog OS=Homo sapiens OX=9606 GN=RRS1 PE=1 SV=2	0	FALSE	18.309	13	3	5	3	1	365	41.2	10.7	17.17	3	cell differentiation;cell organization and biogenesis;metabolic process;regulation of biological process;transport	chromosome;endoplasmic reticulum;nucleus	protein binding;RNA binding	Pf04939	23212	ENSG00000179041.3	RRS1	8			0	2.539	0.972	0.228	0.992	0.902	7.46311e-09	0.989686	4.24865e-16	0.99816	0.961714	106.83	95.44	2.5	50.59	44.46	63.2	249.5	39.7	47.6	101.61	3.16
TRUE	High	Master Protein	P01033	Metalloproteinase inhibitor 1 OS=Homo sapiens OX=9606 GN=TIMP1 PE=1 SV=1	0	FALSE	42.161	48	6	19	6	1	207	23.2	8.1	65.82	6	cell organization and biogenesis;metabolic process;regulation of biological process;response to stimulus;transport	extracellular;organelle lumen	enzyme regulator activity;metal ion binding;protein binding	Pf00965	7076	ENSG00000102265.11	TIMP1	X	HIF-1 signaling pathway	IL1 and megakaryocytes in obesity; Matrix Metalloproteinases; IL-6 signaling pathway; Lung fibrosis	0	2.473	0.961	1.154	2.427	2.241	4.49643e-16	0.945903	0.903008	3.54689e-16	1.41396e-13	63.35	42.39	56.52	37.76	41.8	74.5	132.6	50.3	142.7	11.22	45.92
TRUE	High	Master Protein	P17152	Transmembrane protein 11, mitochondrial OS=Homo sapiens OX=9606 GN=TMEM11 PE=1 SV=1	0.001	FALSE	6.717	13	2	5	2	1	192	21.5	7.36	10.64	2	cell organization and biogenesis	membrane;mitochondrion	protein binding	Pf14972	8834	ENSG00000178307.9	TMEM11	17			0	2.38	2.862	1.247	1.037	2.968	8.03937e-07	1.09874e-05	0.868284	0.955157	1.50908e-09	65.47	103.91	89.63	16.47	116.09	63.4	97.6	117.3	121.7	50.57	73.16
TRUE	High	Master Protein	P98172	Ephrin-B1 OS=Homo sapiens OX=9606 GN=EFNB1 PE=1 SV=1	0	FALSE	19.449	14	2	9	2	1	346	38	8.94	32	2	cell communication;cell differentiation;cellular component movement;development;regulation of biological process;response to stimulus	cytoplasm;membrane;nucleus	protein binding	Pf00812	1947	ENSG00000090776.5	EFNB1	X	Axon guidance		0	2.366	2.201	0.601	0.637	1.149	6.53954e-08	0.00779029	0.0106179	0.0355427	0.961714	52.08	58.13	19.24	18.91	72.07	51.5	139.6	127.7	81.3	68.94	19.28
TRUE	High	Master Protein	O14763	Tumor necrosis factor receptor superfamily member 10B OS=Homo sapiens OX=9606 GN=TNFRSF10B PE=1 SV=2	0.001	FALSE	6.05	7	2	2	2	1	440	47.8	5.55	3.76	2	cell death;cellular component movement;defense response;development;metabolic process;regulation of biological process;response to stimulus	cell surface;membrane	protein binding;receptor activity;signal transducer activity	Pf00020, Pf00531	8795	ENSG00000120889.12	TNFRSF10B	8	Cytokine-cytokine receptor interaction; Natural killer cell mediated cytotoxicity; Apoptosis; p53 signaling pathway; Measles; Influenza A	DNA Damage Response; Apoptosis; miRNA Regulation of DNA Damage Response; Apoptosis-related network due to altered Notch3 in ovarian cancer	0	2.24	15.227	0.01	0.01	0.01	3.18124e-06	3.59486e-16	4.24865e-16	3.54689e-16	3.9087e-16	30.88	30.88				21.7	48.5	329.8		28.84
TRUE	High	Master Protein	Q9H9Y6	DNA-directed RNA polymerase I subunit RPA2 OS=Homo sapiens OX=9606 GN=POLR1B PE=1 SV=2	0	FALSE	13.32	4	2	3	2	1	1135	128.1	7.83	4.74	2	cell organization and biogenesis;metabolic process;regulation of biological process	cytosol;nucleus	catalytic activity;DNA binding;metal ion binding;protein binding	Pf00562, Pf04560, Pf04561, Pf04563, Pf04565, Pf04567, Pf06883	84172	ENSG00000125630.15	POLR1B	2	Purine metabolism; RNA polymerase; Metabolic pathways; Pyrimidine metabolism	Eukaryotic Transcription Initiation	0	2.191	0.911	0.541	1.125	0.887	0.00434182	0.963559	0.0988056	0.906453	0.961714	45.34	43.52	16.81	30.29	15.91	78.9	197.8	58	65.3	41.52	95.28
TRUE	High	Master Protein	Q8IUE6	Histone H2A type 2-B OS=Homo sapiens OX=9606 GN=HIST2H2AB PE=1 SV=3	0	FALSE	34.15	52	4	41	2	1	130	14	10.89	145.07	4	regulation of biological process	chromosome;nucleus	DNA binding;protein binding	Pf00125, Pf00808	317772	ENSG00000184270.4	HIST2H2AB	1	Systemic lupus erythematosus; Alcoholism		0	2.189	2.23	0.927	0.858	1.951	9.86099e-13	3.77426e-07	0.744149	0.521906	3.2877e-06	125.22	108.56	76.43	70.38	74.98	56.8	147.5	97.7	98	55.32	43.71
TRUE	High	Master Protein	P08123	Collagen alpha-2(I) chain OS=Homo sapiens OX=9606 GN=COL1A2 PE=1 SV=7	0	FALSE	27.426	5	4	6	4	1	1366	129.2	8.95	17.59	4	cell organization and biogenesis;cellular component movement;coagulation;metabolic process;regulation of biological process;response to stimulus	endoplasmic reticulum;extracellular;organelle lumen	metal ion binding;protein binding;structural molecule activity	Pf01391, Pf01410	1278	ENSG00000164692.17	COL1A2	7	Amoebiasis; Protein digestion and absorption; AGE-RAGE signaling pathway in diabetic complications; Focal adhesion; ECM-receptor interaction; PI3K-Akt signaling pathway; Platelet activation	miRNA targets in ECM and membrane receptors; TGF-beta Signaling Pathway; Focal Adhesion-PI3K-Akt-mTOR-signaling pathway; Inflammatory Response Pathway; Focal Adhesion	0	2.105	8.762	0.831	0.131	1.15	2.81043e-06	3.59486e-16	0.480817	3.54689e-16	0.93579	66.15	0	57.73	0.86	49.78	11.6	139.8	101.2	147.4		78.36
TRUE	High	Master Protein	P50613	Cyclin-dependent kinase 7 OS=Homo sapiens OX=9606 GN=CDK7 PE=1 SV=1	0.001	FALSE	7.197	12	2	4	2	1	346	39	8.47	2.6	2	cell division;cell organization and biogenesis;cell proliferation;metabolic process;regulation of biological process;response to stimulus	cytoplasm;nucleus	catalytic activity;nucleotide binding;protein binding	Pf00069, Pf07714, Pf14531	1022	ENSG00000277273.5; ENSG00000134058.11	CDK7	5; CHR_HSCHR5_2_CTG1_1	Basal transcription factors; Nucleotide excision repair; Cell cycle	Integrated Breast Cancer Pathway; Eukaryotic Transcription Initiation; Cardiac Hypertrophic Response; MicroRNAs in cardiomyocyte hypertrophy; G1 to S cell cycle control	0	2.105	0.946	0.325	0.724	0.685	1.64215e-05	0.974896	8.17807e-10	0.470206	0.432731	0	0	0	0	0	77.1	197.2	72.9	52.8		27.11
TRUE	High	Master Protein	P02751	Fibronectin OS=Homo sapiens OX=9606 GN=FN1 PE=1 SV=4	0	FALSE	86.814	9	13	27	13	1	2386	262.5	5.71	91.25	13	cell differentiation;cell organization and biogenesis;cellular component movement;defense response;metabolic process;regulation of biological process;response to stimulus;transport	extracellular;membrane;organelle lumen	enzyme regulator activity;protein binding	Pf00039, Pf00040, Pf00041	2335	ENSG00000115414.18	FN1	2	Amoebiasis; Pathways in cancer; AGE-RAGE signaling pathway in diabetic complications; Focal adhesion; Proteoglycans in cancer; Regulation of actin cytoskeleton; Bacterial invasion of epithelial cells; Small cell lung cancer; ECM-receptor interaction; PI3K-Akt signaling pathway	Senescence and Autophagy in Cancer; TGF-beta Signaling Pathway; Regulation of Actin Cytoskeleton; Focal Adhesion-PI3K-Akt-mTOR-signaling pathway; Association Between Physico-Chemical Features and Toxicity Associated Pathways; Rac1/Pak1/p38/MMP-2 pathway; miRNA targets in ECM and membrane receptors; Inflammatory Response Pathway; Focal Adhesion; miR-509-3p alteration of YAP1/ECM axis; TGF-B Signal…	0	2.092	1.612	1.422	3.401	2.182	9.77462e-15	0.223298	0.0380288	3.54689e-16	8.52028e-14	58.46	59.93	72.61	97.86	66.58	26.8	99.9	12.2	261.1	18.95	93.23
TRUE	High	Master Protein	P57076	Cilia- and flagella-associated protein 298 OS=Homo sapiens OX=9606 GN=CFAP298 PE=1 SV=1	0	FALSE	13.246	20	2	2	2	1	290	33.2	7.44	6.77	2	cell organization and biogenesis;regulation of biological process	cytoplasm;cytoskeleton;cytosol;nucleus		Pf11069	56683	ENSG00000159079.18	C21orf59	21			0	2.065	2.057	0.73	0.733	1.507	0.00022635	0.0241697	0.213149	0.444103	0.411424	52.51	52.51	30.75	31.01	40.81	60.3	124.6	124.1	90.9	47.21
TRUE	High	Master Protein	Q9NV88	Integrator complex subunit 9 OS=Homo sapiens OX=9606 GN=INTS9 PE=1 SV=2	0.001	FALSE	7.422	6	2	4	2	1	658	73.8	6.33	9.67	2	metabolic process	cytosol;nucleus	protein binding	Pf10996	55756	ENSG00000104299.14	INTS9	8			0	2.053	2.37	1.535	1.33	3.151	0.0140203	0.0113954	0.467829	0.50477	3.25654e-05	139.53	147.06	7.79	0	147.06	46.7	95.8	110.6	147	99.59	7.42
TRUE	High	Master Protein	O60437	Periplakin OS=Homo sapiens OX=9606 GN=PPL PE=1 SV=4	0.001	FALSE	7.465	2	2	5	2	1	1756	204.6	5.6	12.22	2	cell death;cell organization and biogenesis;metabolic process;response to stimulus	cytoplasm;cytoskeleton;cytosol;membrane;mitochondrion;nucleus	protein binding;structural molecule activity	Pf04111	5493	ENSG00000118898.15	PPL	16			0	2.043	0.825	0.719	1.02	1.107	1.37675e-05	0.906212	0.162242	0.991796	0.991755	67.36	57.74	50.34	78.25	95.42	54.5	240	53.5	52	99.12	63.89
TRUE	High	Master Protein	Q86TM6	E3 ubiquitin-protein ligase synoviolin OS=Homo sapiens OX=9606 GN=SYVN1 PE=1 SV=2	0	FALSE	14.638	6	2	9	2	1	617	67.6	6.95	36.81	2	metabolic process;regulation of biological process;response to stimulus;transport	endoplasmic reticulum;membrane	catalytic activity;metal ion binding;protein binding	Pf00097, Pf12678, Pf12861, Pf12906, Pf13445, Pf13639, Pf13920, Pf13923, Pf14634	84447	ENSG00000162298.18	SYVN1	11	Ubiquitin mediated proteolysis; Protein processing in endoplasmic reticulum		0	0.5	1.135	1.88	0.916	1.064	0.00013717	0.948402	0.00849425	0.89559	0.996231	15.86	29.48	95.03	28.47	44.53	94.6	83.4	115.7	106.4	6.74
TRUE	High	Master Protein	Q13889	General transcription factor IIH subunit 3 OS=Homo sapiens OX=9606 GN=GTF2H3 PE=1 SV=2	0.001	FALSE	5.856	8	2	2	2	1	308	34.4	7.02	4.52	2	cell organization and biogenesis;metabolic process;regulation of biological process;response to stimulus	nucleus	catalytic activity;DNA binding;metal ion binding;protein binding;RNA binding	Pf03850	2967	ENSG00000111358.13	GTF2H3	12	Viral carcinogenesis; Basal transcription factors; Nucleotide excision repair	Eukaryotic Transcription Initiation	0	0.499	0.873	1.029	0.588	0.513	0.0891009	0.953754	0.987898	0.388464	0.178496	42.41	0	109.07	23.69	18.04	138.7	69.2	121	71.2		106.73
TRUE	High	Master Protein	O43896	Kinesin-like protein KIF1C OS=Homo sapiens OX=9606 GN=KIF1C PE=1 SV=3	0	FALSE	24.535	5	5	10	2	1	1103	122.9	6.9	26.66	5	cellular component movement;transport	cytoplasm;cytoskeleton;endoplasmic reticulum;Golgi	catalytic activity;motor activity;nucleotide binding;protein binding;RNA binding	Pf00225, Pf00498	10749	ENSG00000129250.11	KIF1C	17			1	0.488	0.01	0.01		0.01	1.32855e-08	3.59486e-16	4.24865e-16		3.9087e-16	0					268.8	131.2
TRUE	High	Master Protein	O95363	Phenylalanine--tRNA ligase, mitochondrial OS=Homo sapiens OX=9606 GN=FARS2 PE=1 SV=1	0	FALSE	17.125	10	3	6	3	1	451	52.3	7.46	10.57	3	metabolic process	cytoplasm;mitochondrion;organelle lumen	catalytic activity;metal ion binding;nucleotide binding;protein binding;RNA binding	Pf01409, Pf03147	10667	ENSG00000145982.11	FARS2	6	Aminoacyl-tRNA biosynthesis		0	0.478	0.698	1.157	1.484	0.554	0.00100101	0.351986	0.966559	0.142573	0.00106842	7.11	35.77	73.72	65.17	19.36	139.3	51.5	94.2	115	52.63	76.09
TRUE	High	Master Protein	Q8NG11	Tetraspanin-14 OS=Homo sapiens OX=9606 GN=TSPAN14 PE=1 SV=1	0	FALSE	9.776	10	2	8	2	1	270	30.7	6.84	24.49	2	cell organization and biogenesis;metabolic process;regulation of biological process;transport	membrane	protein binding	Pf00335	81619	ENSG00000108219.14	TSPAN14	10			0	0.467	0.63	1.808	1.341	0.845	0.0282897	0.309264	0.162486	0.588786	0.845344	2.53	6.69	11.18	16.29	4.48	136	63.5	85.7	114.9	1.09	11.09
TRUE	High	Master Protein	Q68D85	Natural cytotoxicity triggering receptor 3 ligand 1 OS=Homo sapiens OX=9606 GN=NCR3LG1 PE=1 SV=1	0	FALSE	15.991	10	3	6	3	1	454	50.8	5.59	15.67	3	regulation of biological process	membrane	protein binding;structural molecule activity	Pf01140, Pf07654, Pf08205	374383	ENSG00000188211.8	NCR3LG1	11			0	0.453	0.689	0.92	0.897	0.644	4.09011e-08	0.107366	0.85759	0.861445	0.00665504	16.8	29.68	42.04	28.76	20.77	142.2	86.5	89.5	81.7	44.05	51.49
TRUE	High	Master Protein	Q9UKD1	Glucocorticoid modulatory element-binding protein 2 OS=Homo sapiens OX=9606 GN=GMEB2 PE=1 SV=1	0	FALSE	14.499	6	2	5	2	1	530	56.4	5.6	16.83	2	metabolic process;regulation of biological process	cytoplasm;cytosol;nucleus	DNA binding;metal ion binding;protein binding	Pf01342	26205	ENSG00000101216.10	GMEB2	20			0	0.45	0.564	1.724	1.555	0.86	0.0163371	0.374445	0.455462	0.368568	0.917083	12.51	14.14	42.14	45.9	28.35	150.3	57.9	92.1	99.7	37.65	68.19
TRUE	High	Master Protein	O95208	Epsin-2 OS=Homo sapiens OX=9606 GN=EPN2 PE=1 SV=3	0	FALSE	8.011	3	2	5	2	1	641	68.4	7.52	12.47	2	cell organization and biogenesis;transport	cytoplasm;cytosol	protein binding	Pf01417, Pf07651	22905	ENSG00000072134.15	EPN2	17	Endocytosis		0	0.448	0.695	3.155	0.933	1.318	0.0111396	0.618384	1.34579e-06	0.935664	0.69787	5.98	18.92	55.79	90.16	53.34	102	85.5	66.4	146.1	85.12	97.73
TRUE	High	Master Protein	Q7Z5G4	Golgin subfamily A member 7 OS=Homo sapiens OX=9606 GN=GOLGA7 PE=1 SV=2	0	FALSE	8.47	19	2	4	2	1	137	15.8	7.05	6.66	2	cell organization and biogenesis;metabolic process;regulation of biological process;transport	extracellular;Golgi;membrane	catalytic activity;protein binding	Pf10256	51125	ENSG00000147533.16	GOLGA7	8			0	0.429	0.411	3.335	3.476	1.43	0.00885452	0.00981538	2.27182e-05	1.79656e-08	0.579451	2.92	8.09	15.22	51.89	17.04	122.3	52.5	50.3	174.9	16.74	14.97
TRUE	High	Master Protein	Q8TEQ8	GPI ethanolamine phosphate transferase 3 OS=Homo sapiens OX=9606 GN=PIGO PE=1 SV=3	0	FALSE	9.892	3	2	7	2	1	1089	118.6	8.12	16.62	2	metabolic process	endoplasmic reticulum;membrane	catalytic activity	Pf01663	84720	ENSG00000165282.13	PIGO	9	Metabolic pathways; Glycosylphosphatidylinositol (GPI)-anchor biosynthesis		0	0.415	0.743	1.164	0.629	0.547	9.17491e-07	0.567537	0.972282	0.198631	0.00369684	15.53	46.59	69.92	37.8	33.39	197.2	66.7	58.7	77.3	14.14	74.52
TRUE	High	Master Protein	P27144	Adenylate kinase 4, mitochondrial OS=Homo sapiens OX=9606 GN=AK4 PE=1 SV=1	0	FALSE	9.199	13	2	3	2	1	223	25.3	8.4	5.82	2	metabolic process;response to stimulus	mitochondrion;organelle lumen	catalytic activity;nucleotide binding	Pf00406, Pf05191, Pf13207, Pf13238, Pf13671	205	ENSG00000162433.14	AK4; LOC100507855	1	Purine metabolism; Thiamine metabolism; Metabolic pathways		0	0.401	1.277	1.688	0.676	0.769	0.00317398	0.867662	0.497427	0.475072	0.706654	5.52	62.15	32.39	29.26	41.79	140.8	51.5	120.6	87	67.5	18.52
TRUE	High	Master Protein	Q16798	NADP-dependent malic enzyme, mitochondrial OS=Homo sapiens OX=9606 GN=ME3 PE=2 SV=2	0	FALSE	38.507	15	4	15	4	1	604	67	7.97	51.57	4	metabolic process	mitochondrion;organelle lumen	catalytic activity;metal ion binding;nucleotide binding	Pf00390, Pf03949	10873	ENSG00000151376.16	ME3	11	Carbon metabolism; Pyruvate metabolism; Metabolic pathways		0	0.399	1.058	0.981	0.916	0.949	7.08597e-07	0.9828	0.951387	0.914129	0.966493	9.65	92.28	97.1	58.9	84.23	84.1	113.6	99.6	102.7	70.68	62.76
TRUE	High	Master Protein	Q13610	Periodic tryptophan protein 1 homolog OS=Homo sapiens OX=9606 GN=PWP1 PE=1 SV=1	0	FALSE	17.401	12	3	9	3	1	501	55.8	4.77	31.6	3	cell organization and biogenesis;metabolic process;regulation of biological process	Golgi;nucleus	protein binding	Pf00400	11137	ENSG00000136045.11	PWP1	12			0	0.398	0.856	2.411	1.323	1.133	4.39789e-11	0.672468	6.19309e-07	0.0919065	0.874045	12.28	6.95	62.97	27.15	30.52	137.6	35.9	120.1	106.3	0.16	68.79
TRUE	High	Master Protein	Q9P0M9	39S ribosomal protein L27, mitochondrial OS=Homo sapiens OX=9606 GN=MRPL27 PE=1 SV=1	0	FALSE	25.736	28	3	10	3	1	148	16.1	10.42	26.74	3	cell organization and biogenesis;metabolic process	membrane;mitochondrion;ribosome	protein binding;RNA binding;structural molecule activity	Pf01016	51264	ENSG00000108826.15	MRPL27	17	Ribosome		0	0.397	1.169	2.735	0.894	1.07	6.26862e-08	0.896823	3.72277e-07	0.808111	0.992073	17.67	16.51	90.85	21.63	15.66	131.9	42.2	110.5	115.4	34.59	81.02
TRUE	High	Master Protein	Q13315	Serine-protein kinase ATM OS=Homo sapiens OX=9606 GN=ATM PE=1 SV=4	0.001	FALSE	5.659	1	2	2	2	1	3056	350.5	6.81	2.08	2	cell death;cell organization and biogenesis;metabolic process;regulation of biological process;response to stimulus;transport	cytoplasm;nucleus	catalytic activity;DNA binding;nucleotide binding;protein binding;transporter activity	Pf00454, Pf02259, Pf02260, Pf11640	472	ENSG00000149311.18	ATM	11	FoxO signaling pathway; Homologous recombination; MicroRNAs in cancer; NF-kappa B signaling pathway; HTLV-I infection; Apoptosis; Transcriptional misregulation in cancer; p53 signaling pathway; Cell cycle; Platinum drug resistance	Hematopoietic Stem Cell Gene Regulation by GABP alpha/beta Complex; DDX1 as a regulatory component of the Drosha microprocessor; Signaling Pathways in Glioblastoma; miRNA Regulation of DNA Damage Response; DNA Damage Response; miRNAs involved in DNA damage response; G1 to S cell cycle control; ATM Signaling Network in Development and Disease; Pathways Affected in Adenoid Cystic Carcinoma; ATM Sig…	0	0.395	0.7	0.884	0.663	0.464	0.00298394	0.588627	0.896007	0.486809	0.00933166	7.23	0	2.75	0	0	159.8	82.3	111.8	46.1		5.99
TRUE	High	Master Protein	Q13595	Transformer-2 protein homolog alpha OS=Homo sapiens OX=9606 GN=TRA2A PE=1 SV=1	0	FALSE	12.264	12	2	3	2	1	282	32.7	11.27	8.27	2	metabolic process	nucleus	RNA binding	Pf00076, Pf13893, Pf14259	29896	ENSG00000164548.10	TRA2A	7	Spliceosome		0	0.392	2.171	1.177	0.855	1.246	7.5682e-07	0.00539881	0.921974	0.753888	0.763711	24	92.68	47.31	39.83	4.19	79.1	75.5	153	92.3	3.99	7.04
TRUE	High	Master Protein	Q96RU3	Formin-binding protein 1 OS=Homo sapiens OX=9606 GN=FNBP1 PE=1 SV=2	0	FALSE	10.128	7	3	4	3	1	617	71.3	5.72	4.08	3	cell organization and biogenesis;transport	cytoplasm;cytoskeleton;cytosol;membrane;vacuole	protein binding	Pf00018, Pf00611, Pf07653, Pf08239, Pf13654, Pf14604	23048	ENSG00000187239.16	FNBP1	9			0	0.38	1.132	3.128	1.044	1.188	0.00127951	0.953754	0.000150261	0.970307	0.941599	0.39	23.91	13.79	20	13.54	108.1	41.1	122.4	128.4	2.61
TRUE	High	Master Protein	P51511	Matrix metalloproteinase-15 OS=Homo sapiens OX=9606 GN=MMP15 PE=1 SV=1	0	FALSE	7.608	4	2	2	2	1	669	75.8	7.46	1.92	2	cell differentiation;cell organization and biogenesis;metabolic process;regulation of biological process;response to stimulus	membrane	catalytic activity;enzyme regulator activity;metal ion binding;protein binding	Pf00045, Pf00413, Pf01471, Pf07998, Pf11857	4324	ENSG00000102996.4	MMP15	16		Matrix Metalloproteinases	0	0.331	0.01	1.396	100	0.462	7.89998e-05	3.59486e-16	0.799675	3.54689e-16	0.00831732	4.61		8.03		8.52	223	73.9		103.1	38.6
TRUE	High	Master Protein	P19256	Lymphocyte function-associated antigen 3 OS=Homo sapiens OX=9606 GN=CD58 PE=1 SV=1	0.001	FALSE	6.843	10	2	3	2	1	250	28.1	6.76	3.62	2	cellular component movement;regulation of biological process;response to stimulus;transport	cell surface;membrane	protein binding		965	ENSG00000116815.15	CD58	1	Epstein-Barr virus infection; Cell adhesion molecules (CAMs)		0	0.321	1.012	2.832	0.882	0.911	0.000816992	0.997752	0.0314509	0.949883	0.968988	0	21.25	41.1	31.34	34.08	123.3	39.6	124.8	112.3
TRUE	Medium	Master Protein	P82914	28S ribosomal protein S15, mitochondrial OS=Homo sapiens OX=9606 GN=MRPS15 PE=1 SV=1	0.029	FALSE	2.312	9	2	5	2	1	257	29.8	10.48	6.04	2	cell organization and biogenesis;metabolic process	membrane;mitochondrion;nucleus;ribosome	RNA binding;structural molecule activity	Pf00312	64960	ENSG00000116898.11	MRPS15	1	Ribosome		0	0.308	0.01	0.726	100	0.501	1.81552e-05	3.59486e-16	0.622213	3.54689e-16	0.0271698	7.92		17.76		12.72	250.2	66.5		83.2	95.92	55.84
TRUE	High	Master Protein	P78362	SRSF protein kinase 2 OS=Homo sapiens OX=9606 GN=SRPK2 PE=1 SV=3	0	FALSE	17.191	14	6	13	4	1	688	77.5	4.97	11.62	6	cell differentiation;cell organization and biogenesis;defense response;metabolic process;regulation of biological process;response to stimulus	cytoplasm;cytosol;nucleus	catalytic activity;metal ion binding;nucleotide binding;protein binding;RNA binding	Pf00069, Pf07714	6733	ENSG00000135250.16	SRPK2	7		mRNA Processing	0	0.303	0.208	0.445	1.043	0.649	1.1744e-05	2.54809e-06	0.0108632	0.969854	0.3906	4.39	0	24.15	46.42	22.34	105.5	89.6	94.3	110.5	83.29	100
TRUE	High	Master Protein	Q03001	Dystonin OS=Homo sapiens OX=9606 GN=DST PE=1 SV=4	0.001	FALSE	6.741	1	3	10	2	1	7570	860.1	5.25	5.6	3	cell organization and biogenesis;cellular component movement;regulation of biological process;response to stimulus;transport	cytoplasm;cytoskeleton;cytosol;endoplasmic reticulum;membrane;nucleus	metal ion binding;protein binding	Pf00307, Pf00435, Pf00681, Pf02187, Pf11971, Pf13499, Pf13833	667		DST	6			0	0.293	0.189	0.78	1.208	0.229	1.08274e-05	1.25776e-06	0.743662	0.848651	1.71679e-06	16.63	0	55.76	121.26	6.34	233.8	68.5	44.2	53.5		112.24
TRUE	High	Master Protein	Q8WVB6	Chromosome transmission fidelity protein 18 homolog OS=Homo sapiens OX=9606 GN=CHTF18 PE=1 SV=1	0	FALSE	25.121	7	6	10	5	1	975	107.3	7.21	14.7	6	metabolic process;regulation of biological process;response to stimulus	cytosol;membrane;nucleus	catalytic activity;DNA binding;nucleotide binding;protein binding	Pf00004, Pf01695, Pf03215, Pf05496, Pf06068, Pf06144, Pf07728, Pf13191, Pf13207, Pf13238, Pf13401	63922	ENSG00000127586.16	CHTF18	16		Gastric cancer network 2	0	0.247	1.392	1.42	0.859	0.625	5.22703e-08	0.682857	0.516736	0.775342	0.169468	6.72	113.58	78.08	40.69	42.96	34	93.3	159.9	112.8	133.47	112.64
TRUE	High	Master Protein	Q9BZQ6	ER degradation-enhancing alpha-mannosidase-like protein 3 OS=Homo sapiens OX=9606 GN=EDEM3 PE=1 SV=2	0.001	FALSE	6.76	3	2	2	2	1	932	104.6	4.93	5.14	2	metabolic process;regulation of biological process;response to stimulus	endoplasmic reticulum;membrane;organelle lumen	catalytic activity;metal ion binding	Pf01532, Pf02225	80267	ENSG00000116406.18	EDEM3	1	Protein processing in endoplasmic reticulum		0	0.229	0.421	1.068	1.159	0.28	2.98834e-13	0.000204217	0.999979	0.888479	8.62547e-15	2.91	15.53	0	74.7	2.8	244.5	28	59.1	68.5	69.78	96.23
TRUE	High	Master Protein	Q9HCG8	Pre-mRNA-splicing factor CWC22 homolog OS=Homo sapiens OX=9606 GN=CWC22 PE=1 SV=3	0	FALSE	10.914	5	3	10	3	1	908	105.4	7.03	24.28	3	metabolic process;regulation of biological process	cytosol;nucleus;spliceosomal complex	protein binding;RNA binding	Pf02847, Pf02854	57703	ENSG00000163510.13	CWC22	2			0	0.215	0.986	1	0.749	0.683	1.01024e-09	0.974896	0.972657	0.345148	0.110998	4.76	72.19	32.58	43.71	43.95	118.2	19.2	139.4	123.1	63.35	10.76
TRUE	High	Master Protein	Q9Y448	Small kinetochore-associated protein OS=Homo sapiens OX=9606 GN=KNSTRN PE=1 SV=2	0	FALSE	10.191	9	2	2	2	1	316	35.4	6.3	5.82	2	cell division;cell organization and biogenesis;regulation of biological process	chromosome;cytoplasm;cytoskeleton;cytosol;nucleus	protein binding		90417	ENSG00000128944.13	C15orf23; KNSTRN	15			0	0.126	0.366	7.816	2.697	0.987	4.49643e-16	0.0221464	1.92144e-10	0.00111331	0.992073	0.69	9.43	61.11	107.96	20.29	161.3	20.4	59	159.3	17.35	133.33
TRUE	High	Master Protein	Q7Z7E8	Ubiquitin-conjugating enzyme E2 Q1 OS=Homo sapiens OX=9606 GN=UBE2Q1 PE=1 SV=1	0	FALSE	11.001	10	3	4	3	1	422	46.1	5.1	11.43	3	metabolic process;response to stimulus;transport	cytoplasm;cytosol;nucleus	catalytic activity;nucleotide binding;protein binding		55585	ENSG00000160714.9	UBE2Q1	1	Ubiquitin mediated proteolysis		0	0.097	0.142	1.728	1.178	0.167	4.49643e-16	3.59486e-16	0.604732	0.864275	2.29093e-09	1.12	8.29	125.78	411.54	0	93.3	9	282.1	15.6		134.45
TRUE	High	Master Protein	Q9H9H4	Vacuolar protein sorting-associated protein 37B OS=Homo sapiens OX=9606 GN=VPS37B PE=1 SV=1	0	FALSE	15.312	24	3	7	3	1	285	31.3	7.34	18.64	3	cell communication;cell organization and biogenesis;metabolic process;regulation of biological process;response to stimulus;transport	cytoplasm;endosome;membrane	protein binding	Pf07200	79720	ENSG00000139722.6	VPS37B	12	Endocytosis		0	0.01	2.752	100	0.752	2.072	4.49643e-16	0.000584035	4.24865e-16	0.469439	0.0338405		43.21		12.54	44.01	72.4		199.2	128.5	46.29
TRUE	High	Master Protein	Q9H0R3	Transmembrane protein 222 OS=Homo sapiens OX=9606 GN=TMEM222 PE=1 SV=2	0	FALSE	12.894	29	3	5	3	1	208	23.2	6.51	8.95	3		membrane		Pf05608	84065	ENSG00000186501.14	TMEM222	1			0	0.01			0.01	0.01	4.49643e-16			3.54689e-16	3.9087e-16						303.9		96.1
TRUE	High	Master Protein	Q92817	Envoplakin OS=Homo sapiens OX=9606 GN=EVPL PE=1 SV=3	0	FALSE	9.575	3	4	4	4	1	2033	231.5	6.96	4.17	4	cell death;cell differentiation;metabolic process	cytoplasm;cytoskeleton;cytosol	protein binding;structural molecule activity	Pf00681, Pf05667	2125	ENSG00000167880.7	EVPL	17			0	0.01	0.88	100	0.503	0.423	4.49643e-16	0.85145	4.24865e-16	0.000504648	3.94286e-06		19.94		48.77	28.12	172.2		151.5	76.2	21
TRUE	High	Master Protein	P07998	Ribonuclease pancreatic OS=Homo sapiens OX=9606 GN=RNASE1 PE=1 SV=4	0.001	FALSE	6.941	30	2	4	2	1	156	17.6	8.79	8.16	2	defense response;metabolic process;response to stimulus	extracellular	catalytic activity;protein binding	Pf00074	6035	ENSG00000129538.13	RNASE1	14			0	0.01	2.575	100	0.55	1.159	4.49643e-16	7.05753e-05	4.24865e-16	0.000227355	0.924358		0		9	0	89.8		200.2	110
TRUE	High	Master Protein	Q9NZC3	Glycerophosphodiester phosphodiesterase 1 OS=Homo sapiens OX=9606 GN=GDE1 PE=1 SV=1	0.001	FALSE	6.722	11	2	2	2	1	331	37.7	6.71	2.52	2	metabolic process	membrane	catalytic activity;metal ion binding	Pf03009	51573	ENSG00000006007.11	GDE1	16			0	0.01	2.368	100	0.29	0.666	4.49643e-16	0.0340331	4.24865e-16	6.10151e-10	0.448035		79.66		4.24	49.9	49.1		163.9	187	85.41
TRUE	High	Master Protein	P83111	Serine beta-lactamase-like protein LACTB, mitochondrial OS=Homo sapiens OX=9606 GN=LACTB PE=1 SV=2	0.001	FALSE	6.435	5	2	5	2	1	547	60.7	8.53	10.09	2	metabolic process;regulation of biological process	cytosol;mitochondrion	catalytic activity;protein binding	Pf00144	114294	ENSG00000103642.11	LACTB	15			0	0.01	1.958	100	0.722	1.506	4.49643e-16	0.0790138	4.24865e-16	0.390901	0.538466		20.38		20.41	38.54	87.1		181.7	131.2	9.23
TRUE	High	Master Protein	O60291	E3 ubiquitin-protein ligase MGRN1 OS=Homo sapiens OX=9606 GN=MGRN1 PE=1 SV=2	0.001	FALSE	5.903	10	2	3	2	1	552	60.7	5.15	3.05	2	metabolic process;regulation of biological process;transport	cytoplasm;cytosol;endosome;membrane;nucleus	catalytic activity;metal ion binding;protein binding	Pf00097, Pf13639, Pf13920, Pf13923, Pf14634	23295	ENSG00000102858.12	MGRN1	16	Ubiquitin mediated proteolysis		0	0.01	1.336	100	0.81	1.082	4.49643e-16	0.80497	4.24865e-16	0.687491	0.992073		78.35		54.5	52.39	118.8		152.6	128.6	70.68
[truncated: 15 more columns]
