# Supplementary material for: Mutant KRAS-Associated Proteome Is Mainly Controlled by Exogenous Factors
Source: Cells. 2022 Jun 21;11(13):1988. doi: 10.3390/cells11131988 (PMC9265670; doi:10.3390/cells11131988)
Supplement: Supplementary file 1 [file cells-11-01988-s001.zip › Supplementary file S5_HCT116_siKRAS_FibCM_vs_siCTRL_FibCM.xlsx]

## Sheet: Folha1
Checked	Protein FDR Confidence: Combined	Master	Accession	Description	Exp. q-value: Combined	Contaminant	Sum PEP Score	Coverage [%]	# Peptides	# PSMs	# Unique Peptides	# Protein Groups	# AAs	MW [kDa]	calc. pI	Score Sequest HT: Sequest HT	# Peptides (by Search Engine): Sequest HT	Biological Process	Cellular Component	Molecular Function	Pfam IDs	Entrez Gene ID	Ensembl Gene ID	Gene Symbol	Chromosome	KEGG Pathways	WikiPathways	# Razor Peptides	Abundance Ratio: (2_HCT116_siCTRL_FibCM) / (1_HCT116_siCTRL_ctrlCM)	Abundance Ratio: (3_HCT116_siKRAS_ctrlCM) / (1_HCT116_siCTRL_ctrlCM)	Abundance Ratio: (4_HCT116_siKRAS_FibCM) / (2_HCT116_siCTRL_FibCM)	Abundance Ratio: (4_HCT116_siKRAS_FibCM) / (3_HCT116_siKRAS_ctrlCM)	Abundance Ratio: (4_HCT116_siKRAS_FibCM) / (1_HCT116_siCTRL_ctrlCM)	Abundance Ratio Adj. P-Value: (2_HCT116_siCTRL_FibCM) / (1_HCT116_siCTRL_ctrlCM)	Abundance Ratio Adj. P-Value: (3_HCT116_siKRAS_ctrlCM) / (1_HCT116_siCTRL_ctrlCM)	Abundance Ratio Adj. P-Value: (4_HCT116_siKRAS_FibCM) / (2_HCT116_siCTRL_FibCM)	Abundance Ratio Adj. P-Value: (4_HCT116_siKRAS_FibCM) / (3_HCT116_siKRAS_ctrlCM)	Abundance Ratio Adj. P-Value: (4_HCT116_siKRAS_FibCM) / (1_HCT116_siCTRL_ctrlCM)	Abundance Ratio Variability [%]: (2_HCT116_siCTRL_FibCM) / (1_HCT116_siCTRL_ctrlCM)	Abundance Ratio Variability [%]: (3_HCT116_siKRAS_ctrlCM) / (1_HCT116_siCTRL_ctrlCM)	Abundance Ratio Variability [%]: (4_HCT116_siKRAS_FibCM) / (2_HCT116_siCTRL_FibCM)	Abundance Ratio Variability [%]: (4_HCT116_siKRAS_FibCM) / (3_HCT116_siKRAS_ctrlCM)	Abundance Ratio Variability [%]: (4_HCT116_siKRAS_FibCM) / (1_HCT116_siCTRL_ctrlCM)	Abundances (Grouped): 1_HCT116_siCTRL_ctrlCM	Abundances (Grouped): 2_HCT116_siCTRL_FibCM	Abundances (Grouped): 3_HCT116_siKRAS_ctrlCM	Abundances (Grouped): 4_HCT116_siKRAS_FibCM	Abundances (Grouped) CV [%]: 1_HCT116_siCTRL_ctrlCM	Abundances (Grouped) CV [%]: 2_HCT116_siCTRL_FibCM
TRUE	High	Master Protein	O75529	TAF5-like RNA polymerase II p300/CBP-associated factor-associated factor 65 kDa subunit 5L OS=Homo sapiens OX=9606 GN=TAF5L PE=1 SV=1	0	FALSE	7.136	7	2	2	2	1	589	66.1	5.88	0	2	cell organization and biogenesis;metabolic process;regulation of biological process	nucleus	catalytic activity;protein binding	Pf00400, Pf04494, Pf15492	27097	ENSG00000135801.9	TAF5L	1	Basal transcription factors; Herpes simplex infection		0	0.01	0.913	100	1.121	1.024	4.12715e-16	0.999876	3.26911e-16	0.999063	0.993441		0.08		0	0.1	136.2		124.4	139.4	0.09
TRUE	High	Master Protein	Q15910	Histone-lysine N-methyltransferase EZH2 OS=Homo sapiens OX=9606 GN=EZH2 PE=1 SV=2	0	FALSE	8.35	4	2	6	2	1	746	85.3	7.02	10.18	2	cell organization and biogenesis;metabolic process;regulation of biological process;response to stimulus	cytoplasm;nucleus	catalytic activity;DNA binding;protein binding;RNA binding	Pf00856, Pf11616	2146	ENSG00000106462.10	EZH2	7	Lysine degradation; MicroRNAs in cancer	Mecp2 and Associated Rett Syndrome; Endoderm Differentiation; miRs in Muscle Cell Differentiation; Interactome of polycomb repressive complex 2 (PRC2); Histone Modifications	0		100	100	1.07	100		3.81902e-16	3.26911e-16	0.987612	3.35161e-16				9.85				193.3	206.7
TRUE	High	Master Protein	Q15643	Thyroid receptor-interacting protein 11 OS=Homo sapiens OX=9606 GN=TRIP11 PE=1 SV=3	0	FALSE	8.591	1	2	2	2	1	1979	227.4	5.26	3.01	2	cell differentiation;cell organization and biogenesis;cellular component movement;metabolic process;regulation of biological process;transport	cytoplasm;cytoskeleton;Golgi;membrane;nucleus	protein binding	Pf04111, Pf08317	9321	ENSG00000100815.12	TRIP11	14			0	0.01	0.757	100	1.318	0.998	4.12715e-16	0.962137	3.26911e-16	0.95457	0.993894		0		28.84	28.72	145.2		110	144.9
TRUE	High	Master Protein	Q6UXD5	Seizure 6-like protein 2 OS=Homo sapiens OX=9606 GN=SEZ6L2 PE=1 SV=2	0	FALSE	14.525	5	2	4	2	1	910	97.5	4.89	15.65	2		endoplasmic reticulum;membrane		Pf00084, Pf00431	26470	ENSG00000174938.14	SEZ6L2	16			0	0.01	1.545	100	0.938	1.312	4.12715e-16	0.551713	3.26911e-16	0.905724	0.891873		0		13.04	0	85.3		166.7	148
TRUE	High	Master Protein	P22413	Ectonucleotide pyrophosphatase/phosphodiesterase family member 1 OS=Homo sapiens OX=9606 GN=ENPP1 PE=1 SV=2	0	FALSE	12.635	5	2	2	2	1	925	104.9	7.14	6.52	2	cellular homeostasis;metabolic process;regulation of biological process;response to stimulus;transport	cell surface;extracellular;membrane	catalytic activity;metal ion binding;nucleotide binding;protein binding;receptor activity	Pf01033, Pf01223, Pf01663	5167	ENSG00000197594.11	ENPP1	6	Purine metabolism; Pantothenate and CoA biosynthesis; Starch and sucrose metabolism; Nicotinate and nicotinamide metabolism; Metabolic pathways; Pyrimidine metabolism	Insulin Signaling; Endochondral Ossification	0	0.01	1.851	100	0.842	1.56	4.12715e-16	0.476571	3.26911e-16	0.792527	0.849389		0		0	0	90.7		167.9	141.4
TRUE	High	Master Protein	Q8N8R3	Mitochondrial basic amino acids transporter OS=Homo sapiens OX=9606 GN=SLC25A29 PE=1 SV=2	0	FALSE	10.875	14	3	4	3	1	303	32	8.75	8.78	3	transport	membrane;mitochondrion	transporter activity	Pf00153	123096	ENSG00000197119.12	SLC25A29	14			0	0.01	1.227	100	0.79	0.97	4.12715e-16	0.879451	3.26911e-16	0.743844	0.990529		41.5		11.33	34.53	125.1		153.5	121.3	38.12
TRUE	High	Master Protein	P54652	Heat shock-related 70 kDa protein 2 OS=Homo sapiens OX=9606 GN=HSPA2 PE=1 SV=1	0	FALSE	107.49	21	13	291	2	1	639	70	5.74	914.65	13	cell differentiation;cell organization and biogenesis;metabolic process;regulation of biological process;response to stimulus	cell surface;cytoplasm;cytoskeleton;cytosol;membrane;mitochondrion;nucleus	nucleotide binding;protein binding	Pf00012, Pf06723	3306	ENSG00000126803.9	HSPA2	14	Endocytosis; Longevity regulating pathway - multiple species; Epstein-Barr virus infection; Spliceosome; MAPK signaling pathway; Protein processing in endoplasmic reticulum; Toxoplasmosis; Measles; Influenza A; Estrogen signaling pathway; Legionellosis; Antigen processing and presentation	Parkin-Ubiquitin Proteasomal System pathway	0	0.01	0.428	100	2.308	0.988	4.12715e-16	0.402991	3.26911e-16	0.202063	0.985678		0		47.11	46	165.5		70.9	163.6
TRUE	High	Master Protein	Q7Z569	BRCA1-associated protein OS=Homo sapiens OX=9606 GN=BRAP PE=1 SV=2	0.001	FALSE	6.246	4	2	2	2	1	592	67.3	5.92	2.24	2	metabolic process;regulation of biological process;response to stimulus	cytoplasm;cytosol;membrane	catalytic activity;metal ion binding;nucleotide binding;protein binding	Pf00097, Pf02148, Pf02841, Pf07576, Pf12128, Pf12678, Pf12718, Pf12861, Pf13639, Pf13923, Pf14634	8315	ENSG00000089234.15	BRAP	12	Ras signaling pathway		0		100	100	2.26	100		3.81902e-16	3.26911e-16	0.17987	3.35161e-16				57.92				122.7	277.3
TRUE	High	Master Protein	O15121	Sphingolipid delta(4)-desaturase DES1 OS=Homo sapiens OX=9606 GN=DEGS1 PE=1 SV=1	0	FALSE	9.401	10	2	3	2	1	323	37.8	7.46	9.81	2	metabolic process;transport	endoplasmic reticulum;membrane;mitochondrion	catalytic activity	Pf00487, Pf08557	8560	ENSG00000143753.12	DEGS1	1	Sphingolipid metabolism; Sphingolipid signaling pathway; Metabolic pathways		0		100	100	0.502	100		3.81902e-16	3.26911e-16	0.162384	3.35161e-16				25.2				266.3	133.7
TRUE	High	Master Protein	P11169	Solute carrier family 2, facilitated glucose transporter member 3 OS=Homo sapiens OX=9606 GN=SLC2A3 PE=1 SV=1	0	FALSE	14.073	10	4	16	3	1	496	53.9	7.2	24.27	4	metabolic process;transport	membrane	transporter activity	Pf00083, Pf07690, Pf13347	6515	ENSG00000059804.15	SLC2A3	12		Glycolysis and Gluconeogenesis; NRF2 pathway; Photodynamic therapy-induced HIF-1 survival signaling; Focal Adhesion-PI3K-Akt-mTOR-signaling pathway	0		100	100	0.501	100		3.81902e-16	3.26911e-16	0.0497051	3.35161e-16				9.62				274.2	125.8
TRUE	High	Master Protein	Q86WA8	Lon protease homolog 2, peroxisomal OS=Homo sapiens OX=9606 GN=LONP2 PE=1 SV=1	0	FALSE	7.079	4	2	2	2	1	852	94.6	7.3	3.15	2	cell organization and biogenesis;metabolic process;regulation of biological process;response to stimulus;transport	cytoplasm;membrane;nucleus;organelle lumen	catalytic activity;nucleotide binding;protein binding	Pf00004, Pf01202, Pf02190, Pf05362, Pf07726, Pf07728, Pf13191, Pf13541	83752	ENSG00000102910.13	LONP2	16			0		100	100	2.828	100		3.81902e-16	3.26911e-16	0.021751	3.35161e-16				140.96				104.5	295.5
TRUE	High	Master Protein	P53350	Serine/threonine-protein kinase PLK1 OS=Homo sapiens OX=9606 GN=PLK1 PE=1 SV=1	0	FALSE	7.522	10	3	4	3	1	603	68.2	8.91	0	3	cell division;cell organization and biogenesis;cell proliferation;metabolic process;regulation of biological process;response to stimulus	chromosome;cytoplasm;cytoskeleton;cytosol;nucleus	catalytic activity;metal ion binding;nucleotide binding;protein binding	Pf00069, Pf00659, Pf07714, Pf14531	5347	ENSG00000166851.14	PLK1	16	FoxO signaling pathway; Progesterone-mediated oocyte maturation; Oocyte meiosis; Cell cycle	Regulation of toll-like receptor signaling pathway; Cell Cycle; Integrated Cancer pathway; TNF alpha Signaling Pathway	0	0.01	0.01	100	100	0.512	4.12715e-16	3.81902e-16	3.26911e-16	3.05343e-16	0.414053					1.13	267.2			132.8	29.66
TRUE	High	Master Protein	Q8IX90	Spindle and kinetochore-associated protein 3 OS=Homo sapiens OX=9606 GN=SKA3 PE=1 SV=2	0.002	FALSE	4.956	6	2	3	2	1	412	46.3	5.11	3.38	2	cell division;regulation of biological process	chromosome;cytoplasm;cytoskeleton	protein binding		221150	ENSG00000165480.15	SKA3	13			0	0.01	0.01	100	100	0.886	4.12715e-16	3.81902e-16	3.26911e-16	3.05343e-16	0.969017					20.58	212.1			187.9	24.63
TRUE	High	Master Protein	Q5T160	Probable arginine--tRNA ligase, mitochondrial OS=Homo sapiens OX=9606 GN=RARS2 PE=1 SV=1	0.001	FALSE	6.077	4	2	2	2	1	578	65.5	8.21	2.99	2	cell organization and biogenesis;metabolic process	cytoplasm;mitochondrion;organelle lumen	catalytic activity;nucleotide binding;RNA binding	Pf00750, Pf05746	57038	ENSG00000146282.17	RARS2	6	Aminoacyl-tRNA biosynthesis		0			100	100	100			3.26911e-16	3.05343e-16	3.35161e-16									400
TRUE	High	Master Protein	O15321	Transmembrane 9 superfamily member 1 OS=Homo sapiens OX=9606 GN=TM9SF1 PE=2 SV=2	0	FALSE	8.262	6	2	2	2	1	606	68.8	7.17	6.6	2	metabolic process	membrane;vacuole		Pf02990	10548	ENSG00000100926.14	TM9SF1	14			0	100	100	16.575	14.43	100	4.12715e-16	3.81902e-16	7.18366e-14	3.05343e-16	3.35161e-16			134.79	134.98			21.4	24.5	354.1		23.39
TRUE	High	Master Protein	Q93063	Exostosin-2 OS=Homo sapiens OX=9606 GN=EXT2 PE=1 SV=1	0	FALSE	7.481	7	3	3	3	1	718	82.2	6.55	5.33	3	cell differentiation;metabolic process;regulation of biological process;response to stimulus	endoplasmic reticulum;Golgi;membrane	catalytic activity;metal ion binding;protein binding	Pf03016, Pf09258	2132	ENSG00000151348.13	EXT2	11	Glycosaminoglycan biosynthesis - heparan sulfate / heparin; Metabolic pathways	Mesodermal Commitment Pathway	0	0.258	1.268	12.944	0.54	1.218	4.12715e-16	0.806205	3.26911e-16	0.0163924	0.895891	6.04	88.31	117.71	34.2	59.64	174.2	18.6	82.2	124.9	64.19	75.17
TRUE	High	Master Protein	P09758	Tumor-associated calcium signal transducer 2 OS=Homo sapiens OX=9606 GN=TACSTD2 PE=1 SV=3	0	FALSE	20.982	18	3	4	3	1	323	35.7	8.87	11.37	3	cell proliferation;regulation of biological process;response to stimulus	cytosol;membrane;nucleus	protein binding;receptor activity	Pf00086	4070	ENSG00000184292.6	TACSTD2	1			0	100	100	10.356	0.584	100	4.12715e-16	3.81902e-16	3.74916e-09	0.0787509	3.35161e-16			0	33.11			17	228.4	154.5
TRUE	High	Master Protein	Q9NVH6	Trimethyllysine dioxygenase, mitochondrial OS=Homo sapiens OX=9606 GN=TMLHE PE=1 SV=1	0.002	FALSE	5.044	6	2	3	2	1	421	49.5	7.72	4.86	2	metabolic process;regulation of biological process	mitochondrion;organelle lumen	catalytic activity;metal ion binding	Pf02668	55217	ENSG00000185973.10	TMLHE	X	Lysine degradation		0	100	100	8.539	4.457	100	4.12715e-16	3.81902e-16	2.44947e-07	0.000164171	3.35161e-16			111.77	188.14			34.9	66.9	298.2		80.6
TRUE	High	Master Protein	Q8WUZ0	B-cell CLL/lymphoma 7 protein family member C OS=Homo sapiens OX=9606 GN=BCL7C PE=1 SV=3	0	FALSE	13.82	38	3	7	3	1	217	23.5	5.2	15.15	3	cell death			Pf04714	9274	ENSG00000099385.11	BCL7C	16			0	0.236	1.597	8.273	5.637	1.948	7.81746e-06	0.545588	1.90879e-07	6.30071e-08	0.564469	1.91	326.42	44.79	0	0	37.3	24.7	134.1	204	109.6	113.75
TRUE	High	Master Protein	O14879	Interferon-induced protein with tetratricopeptide repeats 3 OS=Homo sapiens OX=9606 GN=IFIT3 PE=1 SV=1	0	FALSE	29.195	19	6	10	6	1	490	56	5.2	23.9	6	defense response;regulation of biological process;response to stimulus	cytoplasm;cytosol;mitochondrion	protein binding	Pf13414, Pf13424, Pf13432, Pf14559	3437	ENSG00000119917.13	IFIT3	10			0	0.731	4.646	6.698	0.924	4.873	0.785832	1.02914e-05	1.43685e-08	0.801811	3.36814e-06	38.2	49.83	57.66	43.4	57.73	22.1	13.4	185.7	178.7	22.28	45.16
TRUE	High	Master Protein	P19012	Keratin, type I cytoskeletal 15 OS=Homo sapiens OX=9606 GN=KRT15 PE=1 SV=3	0	FALSE	52.843	17	11	141	2	1	456	49.2	4.77	270.77	11	cell death;cell organization and biogenesis	cytosol;nucleus	protein binding;structural molecule activity	Pf00038	3866	ENSG00000171346.15	KRT15	17			0	1.29	2.67	4.892	1.046	2.607	0.263703	6.77202e-06	3.26911e-16	0.95457	1.73245e-05	58.02	63.32	81.41	89.13	116.65	47.9	50.3	154.2	147.5	87.07	89.39
TRUE	High	Master Protein	O43760	Synaptogyrin-2 OS=Homo sapiens OX=9606 GN=SYNGR2 PE=1 SV=1	0	FALSE	7.254	7	2	9	2	1	224	24.8	4.94	19.63	2	cell organization and biogenesis;transport	membrane	protein binding	Pf01284	9144	ENSG00000108639.7	SYNGR2	17			0	0.929	1.84	4.568	1.489	2.724	0.949834	0.288008	1.15596e-05	0.642479	0.0101988	32.95	85.03	124.8	48.01	105.26	70.7	78.5	118	132.8	37.98	44.19
TRUE	High	Master Protein	P09914	Interferon-induced protein with tetratricopeptide repeats 1 OS=Homo sapiens OX=9606 GN=IFIT1 PE=1 SV=2	0	FALSE	30.347	15	5	10	5	1	478	55.3	7.2	26.09	5	defense response;regulation of biological process;response to stimulus;transport	cytoplasm;cytosol	protein binding;RNA binding	Pf00515, Pf13176, Pf13424, Pf14559	3434	ENSG00000185745.9	IFIT1	10	Herpes simplex infection; Hepatitis C		0	1.277	4.065	4.229	1.285	4.088	0.847085	0.000116435	3.61463e-05	0.86499	9.61678e-05	62.47	117.2	69.48	56.93	69.48	20.7	13.9	168.6	196.8	59.96	64.31
TRUE	High	Master Protein	Q9UGT4	Sushi domain-containing protein 2 OS=Homo sapiens OX=9606 GN=SUSD2 PE=1 SV=1	0	FALSE	179.103	40	17	87	17	1	822	90.2	6.28	322.14	17	regulation of biological process;response to stimulus;transport	membrane	protein binding;receptor activity	Pf00084, Pf00094, Pf01033, Pf03782	56241	ENSG00000099994.10	SUSD2	22			0	1.057	4.786	4.171	0.961	4.278	0.845932	3.81902e-16	3.26911e-16	0.617532	3.35161e-16	45.47	76.91	76.21	86.75	62.96	22.7	24.5	185.3	167.5	8.88	37.54
TRUE	High	Master Protein	Q562R1	Beta-actin-like protein 2 OS=Homo sapiens OX=9606 GN=ACTBL2 PE=1 SV=2	0	FALSE	84.325	25	10	659	4	1	376	42	5.59	1428.09	10		cytoplasm;cytoskeleton	nucleotide binding;protein binding	Pf00022	345651	ENSG00000169067.3	ACTBL2	5			0	0.466	0.692	4.134	3.005	1.274	1.4025e-06	0.780811	2.16632e-14	1.57977e-12	0.752475	22.34	43.77	140.42	119.53	140.34	91.1	16.8	66.6	225.5	95.77	100.01
TRUE	High	Master Protein	O95361	Tripartite motif-containing protein 16 OS=Homo sapiens OX=9606 GN=TRIM16 PE=1 SV=3	0	FALSE	20.669	10	3	5	3	1	564	63.9	5.49	14.04	3	cell organization and biogenesis;metabolic process;regulation of biological process;response to stimulus	cytoplasm;cytosol;membrane	DNA binding;metal ion binding;protein binding	Pf00622, Pf13765	10626	ENSG00000221926.11	TRIM16	17			0	0.784	3.01	3.949	1.341	3.098	0.920366	0.0349001	0.000325347	0.903456	0.0348451	0	238.05	387.6	74.75	387.6	10.1	7.9	96.3	285.7
TRUE	High	Master Protein	Q13287	N-myc-interactor OS=Homo sapiens OX=9606 GN=NMI PE=1 SV=2	0	FALSE	27.402	29	7	12	7	1	307	35	5.34	18.2	7	defense response;metabolic process;regulation of biological process;response to stimulus	cytoplasm;cytosol	protein binding	Pf07292, Pf07334	9111	ENSG00000123609.10	NMI	2		IL-2 Signaling Pathway	0	1.127	2.281	3.702	1.37	3.514	0.931016	0.0449247	1.8641e-06	0.696935	3.28388e-05	70.98	55.91	57.59	51.47	67.2	38.1	34.9	129.4	197.6	33.7	51.06
TRUE	High	Master Protein	O95707	Ribonuclease P protein subunit p29 OS=Homo sapiens OX=9606 GN=POP4 PE=1 SV=2	0	FALSE	12.781	9	2	7	2	1	220	25.4	10.07	11.37	2	metabolic process	nucleus	catalytic activity;protein binding;RNA binding	Pf01868	10775	ENSG00000105171.9	POP4	19	Ribosome biogenesis in eukaryotes; RNA transport		0	0.728	0.8	3.674	1.664	1.169	0.759903	0.973826	0.00278471	0.58623	0.972261	63.7	81.58	164.36	91.06	114.42	102.5	20.7	123.5	153.3	35.21	117.9
TRUE	High	Master Protein	P10909	Clusterin OS=Homo sapiens OX=9606 GN=CLU PE=1 SV=1	0	FALSE	42.461	23	7	42	7	1	449	52.5	6.27	105.25	7	cell death;cell organization and biogenesis;cell proliferation;defense response;metabolic process;regulation of biological process;response to stimulus;transport	cell surface;cytoplasm;cytosol;endoplasmic reticulum;extracellular;Golgi;membrane;mitochondrion;nucleus;organelle lumen	catalytic activity;protein binding	Pf01093	1191	ENSG00000120885.21	CLU	8	Complement and coagulation cascades	Complement and Coagulation Cascades	0	1.027	3.147	3.596	1.109	3.411	0.931016	2.72219e-07	1.83916e-13	0.999173	5.31908e-12	58.38	50.23	50.08	36.85	37.39	40.4	43.7	132.8	183.1	29.65	27.15
TRUE	High	Master Protein	O94907	Dickkopf-related protein 1 OS=Homo sapiens OX=9606 GN=DKK1 PE=1 SV=1	0	FALSE	8.253	9	2	3	2	1	266	28.7	8.4	2.65	2	cell organization and biogenesis;development;regulation of biological process;response to stimulus	extracellular;membrane	protein binding;signal transducer activity	Pf04706	22943	ENSG00000107984.9	DKK1	10	Wnt signaling pathway	EDA Signalling in Hair Follicle Development; Mesodermal Commitment Pathway; Differentiation Pathway; Cardiac Progenitor Differentiation; Role of Osx and miRNAs in tooth development; Wnt/beta-catenin Signaling Pathway in Leukemia; Endoderm Differentiation; Primary Focal Segmental Glomerulosclerosis FSGS; VEGFA-VEGFR2 Signaling Pathway	0	0.523	1.418	3.444	0.837	1.461	0.188691	0.777075	0.0191968	0.829563	0.860071	16.83	76.41	35.75	11.4	47.86	70.7	133	101.5	94.8	30.42	70.42
TRUE	High	Master Protein	Q8IXQ6	Protein mono-ADP-ribosyltransferase PARP9 OS=Homo sapiens OX=9606 GN=PARP9 PE=1 SV=2	0	FALSE	45.581	15	10	15	10	1	854	96.3	7.91	33.16	10	cellular component movement;metabolic process;regulation of biological process;response to stimulus	cytoplasm;cytosol;membrane;mitochondrion;nucleus	catalytic activity;enzyme regulator activity;nucleotide binding;protein binding	Pf01661	83666	ENSG00000138496.16	PARP9	3			0	1.022	2.48	3.296	1.525	3.477	0.990085	0.0192966	2.57184e-06	0.244596	1.61745e-05	36.82	70.39	50.1	55.25	51.42	33.8	41.7	150	174.4	39.73	52.15
TRUE	High	Master Protein	Q15582	Transforming growth factor-beta-induced protein ig-h3 OS=Homo sapiens OX=9606 GN=TGFBI PE=1 SV=1	0	FALSE	25.026	12	6	8	6	1	683	74.6	7.71	20.95	6	cell differentiation;cell organization and biogenesis;cell proliferation;metabolic process;regulation of biological process;response to stimulus	extracellular;membrane	protein binding	Pf02469, Pf07546	7045	ENSG00000120708.16	TGFBI	5			0	100		3.124	100	100	4.12715e-16		1.55225e-07	3.05343e-16	3.35161e-16			64.14				89.4		310.6		26.18
TRUE	High	Master Protein	Q93062	RNA-binding protein with multiple splicing OS=Homo sapiens OX=9606 GN=RBPMS PE=1 SV=1	0.001	FALSE	5.482	14	2	2	2	1	196	21.8	8.07	3.8	2	metabolic process;regulation of biological process;response to stimulus	cytoplasm;cytosol;nucleus	protein binding;RNA binding	Pf00076, Pf13893, Pf14259	11030	ENSG00000157110.15	RBPMS	8		Exercise-induced Circadian Regulation	0	0.755	2.093	3.021	1.091	2.536	0.863173	0.300306	0.0513517	0.967124	0.184229	0	103.71	0	83.63	19.48	15.9	164.7	72.8	146.6	146.52
TRUE	High	Master Protein	P80217	Interferon-induced 35 kDa protein OS=Homo sapiens OX=9606 GN=IFI35 PE=1 SV=5	0	FALSE	30.14	22	5	22	5	1	286	31.5	6.09	49.97	5	regulation of biological process;response to stimulus	cytosol;nucleus	protein binding	Pf07292, Pf07334	3430	ENSG00000068079.7	IFI35	17			0	1.1	2.165	3.008	1.351	3.742	0.937707	0.0628528	3.13962e-06	0.68002	3.88663e-06	12.61	18.29	28.76	32.42	30.37	24	50.4	142.8	182.7	29.21	41.67
TRUE	High	Master Protein	P28065	Proteasome subunit beta type-9 OS=Homo sapiens OX=9606 GN=PSMB9 PE=1 SV=2	0	FALSE	28.011	31	5	16	5	1	219	23.3	5.03	44.18	5	metabolic process;regulation of biological process;response to stimulus;transport	cytoplasm;cytosol;nucleus;proteasome	catalytic activity;protein binding	Pf00227	5698	ENSG00000239836.7; ENSG00000243594.7; ENSG00000243067.7; ENSG00000240065.7; ENSG00000240118.7	PSMB9	6; CHR_HSCHR6_MHC_MANN_CTG1; CHR_HSCHR6_MHC_QBL_CTG1; CHR_HSCHR6_MHC_COX_CTG1; CHR_HSCHR6_MHC_DBB_CTG1	Proteasome	Proteasome Degradation; Type II interferon signaling (IFNG)	0	1.297	2.214	2.994	1.481	3.507	0.307077	0.00196613	1.10136e-07	0.242022	5.56475e-08	49.74	46.32	38.32	55.78	44.84	54.2	51.5	134	160.4	50.44	63.38
TRUE	High	Master Protein	Q99496	E3 ubiquitin-protein ligase RING2 OS=Homo sapiens OX=9606 GN=RNF2 PE=1 SV=1	0	FALSE	25.211	17	4	19	2	1	336	37.6	6.84	69.61	4	cell death;cell organization and biogenesis;metabolic process;regulation of biological process;response to stimulus	chromosome;cytosol;endosome;membrane;nucleus	catalytic activity;metal ion binding;nucleotide binding;protein binding	Pf00097, Pf11789, Pf13639, Pf13920, Pf13923, Pf14570, Pf14634, Pf14835, Pf15227	6045	ENSG00000121481.10	RNF2	1			0	0.362	1.232	2.894	0.905	1.047	0.000119783	0.870051	0.018734	0.881192	0.995752	11.41	20.13	94.27	3.43	11.47	112.2	40.6	129.7	117.5	10.91	75.88
TRUE	High	Master Protein	O75127	Pentatricopeptide repeat-containing protein 1, mitochondrial OS=Homo sapiens OX=9606 GN=PTCD1 PE=1 SV=2	0	FALSE	15.56	7	4	8	4	1	700	78.8	8.59	21.93	4	metabolic process	mitochondrion;organelle lumen	RNA binding	Pf01535, Pf13041, Pf13812	26024	ENSG00000106246.17	PTCD1	7			0	0.924	0.676	2.793	1.478	1.792	0.947443	0.79738	0.00584571	0.73953	0.353856	28.68	7.38	60.64	0	60.64	111.4	140.3	113.4	34.8	55.69	18.39
TRUE	High	Master Protein	Q9BUT1	3-hydroxybutyrate dehydrogenase type 2 OS=Homo sapiens OX=9606 GN=BDH2 PE=1 SV=2	0	FALSE	21.836	20	3	12	3	1	245	26.7	7.65	44.64	3	cell differentiation;metabolic process	cytoplasm;cytosol;mitochondrion	catalytic activity;nucleotide binding	Pf00106, Pf13561	56898	ENSG00000164039.14	BDH2	4	Butanoate metabolism; Synthesis and degradation of ketone bodies; Metabolic pathways		0	1.003	2.488	2.78	0.965	3.401	0.98899	0.000324034	2.09808e-05	0.762829	2.58316e-06	58.19	56	73.26	46.61	76.16	47.5	40.7	160.1	151.7	36	36.16
TRUE	High	Master Protein	O75298	Reticulon-2 OS=Homo sapiens OX=9606 GN=RTN2 PE=1 SV=1	0.002	FALSE	4.973	5	2	2	2	1	545	59.2	5.31	4.54	2	regulation of biological process;transport	endoplasmic reticulum;membrane	protein binding	Pf02453	6253	ENSG00000125744.11	RTN2	19			0	1.724	0.01	2.767	100	4.77	0.300792	3.81902e-16	0.018734	3.05343e-16	0.000633126	42.64		48.97		20.58	53.4	92		254.6	19.44	44.35
TRUE	High	Master Protein	P07355	Annexin A2 OS=Homo sapiens OX=9606 GN=ANXA2 PE=1 SV=2	0	FALSE	366.855	79	34	790	34	1	339	38.6	7.75	2571.71	34	cell organization and biogenesis;metabolic process;regulation of biological process;response to stimulus;transport	cell surface;cytoplasm;cytosol;endoplasmic reticulum;endosome;extracellular;membrane;nucleus;organelle lumen	enzyme regulator activity;metal ion binding;protein binding;RNA binding	Pf00191	302	ENSG00000182718.16	ANXA2	15		Prostaglandin Synthesis and Regulation	0	0.721	2.241	2.744	0.96	2.084	2.50438e-06	1.15207e-07	1.97058e-13	0.621187	1.05397e-06	28.71	61.35	65.22	69.27	72.08	58.9	40.7	161.7	138.7	14.03	26.24
TRUE	High	Master Protein	Q9NUQ6	SPATS2-like protein OS=Homo sapiens OX=9606 GN=SPATS2L PE=1 SV=2	0	FALSE	69.294	27	10	31	10	1	558	61.7	9.64	90.85	10		cytoplasm;cytosol;nucleus	protein binding;RNA binding	Pf07139	26010	ENSG00000196141.13	SPATS2L	2			0	1.003	3.278	2.74	1.018	3.123	0.98899	2.92074e-07	1.39275e-06	0.905724	1.39614e-06	61.69	71.93	70.57	60.58	58.74	43.5	45.5	143.4	167.6	53.55	28.35
TRUE	High	Master Protein	P25445	Tumor necrosis factor receptor superfamily member 6 OS=Homo sapiens OX=9606 GN=FAS PE=1 SV=1	0	FALSE	7.658	10	2	2	2	1	335	37.7	7.94	4.96	2	cell communication;cell death;cell organization and biogenesis;defense response;development;metabolic process;regulation of biological process;response to stimulus	cell surface;cytosol;extracellular;membrane;mitochondrion	protein binding;receptor activity;signal transducer activity	Pf00020, Pf00531	355	ENSG00000026103.21	FAS	10	Chagas disease (American trypanosomiasis); TNF signaling pathway; Hepatitis B; Allograft rejection; Cytokine-cytokine receptor interaction; Type I diabetes mellitus; MAPK signaling pathway; Natural killer cell mediated cytotoxicity; Pathways in cancer; Apoptosis; Proteoglycans in cancer; Autoimmune thyroid disease; Alzheimer's disease; p53 signaling pathway; Non-alcoholic fatty liver disease (NAF…	DNA Damage Response; Allograft Rejection; MAPK Signaling Pathway; Apoptosis; T-Cell antigen Receptor (TCR) Signaling Pathway; Nanomaterial induced apoptosis; miRNA Regulation of DNA Damage Response; VEGFA-VEGFR2 Signaling Pathway; Apoptosis Modulation by HSP70; Fas Ligand (FasL) pathway and Stress induction of Heat Shock Proteins (HSP) regulation; Adipogenesis; Alzheimers Disease	0	0.367	1.039	2.727	0.962	0.91	0.00690831	0.98159	0.0653025	0.930559	0.969017	17.28	55.95	96.08	47.1	37.44	120.6	44.2	125.4	109.7		92.64
TRUE	High	Master Protein	Q9H425	Uncharacterized protein C1orf198 OS=Homo sapiens OX=9606 GN=C1orf198 PE=1 SV=1	0	FALSE	14.741	16	3	8	3	1	327	36.3	5.72	13.07	3		cytoplasm;cytosol			84886	ENSG00000119280.16	C1orf198	1			0	0.881	1.769	2.677	0.952	1.724	0.949834	0.338855	0.0762056	0.927484	0.725615	12.32	19.35	23.58	49	20.46	35.7	32.5	192.5	139.3	85.49	28.83
TRUE	High	Master Protein	P47895	Aldehyde dehydrogenase family 1 member A3 OS=Homo sapiens OX=9606 GN=ALDH1A3 PE=1 SV=2	0	FALSE	228.274	71	27	227	24	1	512	56.1	7.25	696.28	27	cell organization and biogenesis;metabolic process;regulation of biological process;response to stimulus	cytoplasm;cytosol;membrane;nucleus	catalytic activity;nucleotide binding;protein binding	Pf00171	220	ENSG00000184254.16	ALDH1A3	15	Tyrosine metabolism; Histidine metabolism; beta-Alanine metabolism; Metabolism of xenobiotics by cytochrome P450; Drug metabolism - cytochrome P450; Chemical carcinogenesis; Glycolysis / Gluconeogenesis; Phenylalanine metabolism; Metabolic pathways	Vitamin A and Carotenoid Metabolism	3	0.995	3.054	2.654	1.041	2.859	0.940139	1.26423e-13	1.55975e-12	0.920331	1.7485e-13	43.74	53.35	66.36	50.93	65.84	49.5	52.8	162.3	135.4	3.53	13.19
TRUE	High	Master Protein	O95926	Pre-mRNA-splicing factor SYF2 OS=Homo sapiens OX=9606 GN=SYF2 PE=1 SV=1	0	FALSE	9.659	15	2	2	2	1	243	28.7	8.4	5.49	2	cell organization and biogenesis;metabolic process;regulation of biological process;response to stimulus	nucleus;spliceosomal complex	protein binding;RNA binding	Pf08231	25949	ENSG00000117614.9	SYF2	1	Spliceosome		0	1.117	0.986	2.624	5.251	2.931	0.945558	0.997657	0.0277159	1.34449e-07	0.0373218	60.85	66.95	128.64	49.01	121.66	71.3	79.7	39.8	209.1	89.71	92.68
TRUE	High	Master Protein	P50895	Basal cell adhesion molecule OS=Homo sapiens OX=9606 GN=BCAM PE=1 SV=2	0	FALSE	99.276	34	15	47	15	1	628	67.4	5.81	145.78	15	regulation of biological process;response to stimulus	cell surface;extracellular;membrane	protein binding;receptor activity;signal transducer activity	Pf00047, Pf07679, Pf08205, Pf13895, Pf13927	4059	ENSG00000187244.10	BCAM	19			0	1.311	3.989	2.62	1.069	3.769	0.0302825	9.48748e-13	1.74001e-07	0.964931	1.47258e-14	45.77	46.38	62.05	45.02	53.78	26.7	41.2	158.4	173.7	16.76	32.98
TRUE	High	Master Protein	O75911	Short-chain dehydrogenase/reductase 3 OS=Homo sapiens OX=9606 GN=DHRS3 PE=1 SV=2	0	FALSE	11.003	11	2	2	2	1	302	33.5	8.84	8.1	2	metabolic process;regulation of biological process	membrane	catalytic activity;nucleotide binding	Pf00106, Pf01370, Pf02719, Pf08659, Pf13561	9249	ENSG00000162496.8	DHRS3	1	Retinol metabolism; Metabolic pathways	Vitamin A and Carotenoid Metabolism	0	100	100	2.615	2.898	100	4.12715e-16	3.81902e-16	0.0198612	0.00532369	3.35161e-16			0	214.41			77.7	42.9	279.4
TRUE	High	Master Protein	Q86WV6	Stimulator of interferon genes protein OS=Homo sapiens OX=9606 GN=TMEM173 PE=1 SV=1	0	FALSE	21.572	10	2	11	2	1	379	42.2	7.05	35.52	2	cell death;defense response;regulation of biological process;response to stimulus;transport	cytoplasm;cytosol;endoplasmic reticulum;Golgi;membrane;mitochondrion	nucleotide binding;protein binding	Pf15009	340061	ENSG00000184584.12	TMEM173	5	NOD-like receptor signaling pathway; Cytosolic DNA-sensing pathway; RIG-I-like receptor signaling pathway	RIG-I-like Receptor Signaling	0	0.839	1.551	2.579	1.217	2.068	0.83868	0.496004	0.00404277	0.923195	0.0685647	63.1	51.49	102.74	53.15	34.08	84.2	36.4	124	155.4	24.37	110.13
TRUE	High	Master Protein	Q6PCE3	Glucose 1,6-bisphosphate synthase OS=Homo sapiens OX=9606 GN=PGM2L1 PE=1 SV=3	0	FALSE	46.828	21	9	24	9	1	622	70.4	7.15	66.38	9	metabolic process	cytosol	catalytic activity;metal ion binding	Pf00408, Pf02878, Pf02879, Pf02880	283209	ENSG00000165434.7	PGM2L1	11	Starch and sucrose metabolism		0	0.93	2.342	2.556	1.016	2.437	0.949834	0.000438274	1.00272e-05	0.901471	0.00116826	28.58	26.6	43.67	40.3	40.28	33.6	64.1	155.4	147	65.14	40.84
TRUE	High	Master Protein	Q8IZV5	Retinol dehydrogenase 10 OS=Homo sapiens OX=9606 GN=RDH10 PE=1 SV=1	0	FALSE	14.67	11	3	6	3	1	341	38.1	7.4	17.6	3	metabolic process	cytoplasm;endoplasmic reticulum;membrane;nucleus	catalytic activity	Pf00106	157506	ENSG00000121039.9	RDH10	8	Retinol metabolism; Metabolic pathways	Vitamin A and Carotenoid Metabolism	0	0.78	2.98	2.516	0.679	1.357	0.811946	0.00355095	0.0557673	0.432068	0.88909	10.72	56.45	55.13	27.17	102.65	69.7	30.5	152.9	146.9	16.09	73.64
TRUE	High	Master Protein	P02794	Ferritin heavy chain OS=Homo sapiens OX=9606 GN=FTH1 PE=1 SV=2	0	FALSE	40.148	43	6	22	6	1	183	21.2	5.55	62.17	6	cellular homeostasis;metabolic process;regulation of biological process;response to stimulus;transport	cytosol;extracellular;nucleus;vacuole	catalytic activity;metal ion binding;protein binding	Pf00210	2495	ENSG00000167996.15	FTH1	11	Mineral absorption	NRF2 pathway; Iron metabolism in placenta	0	0.822	1.091	2.507	1.278	1.662	0.576709	0.872338	7.68729e-06	0.817688	0.125043	54.82	64.27	64.85	31.47	42.23	76.3	62.7	117.8	143.2	42.85	18.29
TRUE	High	Master Protein	Q15633	RISC-loading complex subunit TARBP2 OS=Homo sapiens OX=9606 GN=TARBP2 PE=1 SV=3	0	FALSE	9.295	8	2	3	2	1	366	39	6.54	8.56	2	cell organization and biogenesis;metabolic process;regulation of biological process;response to stimulus	cytoplasm;cytosol;nucleus	protein binding;RNA binding	Pf00035, Pf14709	6895	ENSG00000139546.10	TARBP2	12			0	0.704	0.699	2.494	1.94	1.172	0.688668	0.928915	0.0780866	0.27928	0.975532	10.21	28.35	66.17	73.45	81.35	51.1	63.7	110.2	175	75.25	49.99
TRUE	High	Master Protein	P55268	Laminin subunit beta-2 OS=Homo sapiens OX=9606 GN=LAMB2 PE=1 SV=2	0	FALSE	9.529	2	3	3	3	1	1798	195.9	6.52	6.4	3	cell growth;cell organization and biogenesis;cellular component movement;metabolic process;regulation of biological process;transport	cytoplasm;extracellular;Golgi;organelle lumen	catalytic activity;motor activity;nucleotide binding;protein binding;structural molecule activity;transporter activity	Pf00053, Pf00055, Pf00430, Pf00769, Pf01576, Pf02050, Pf02841, Pf04111, Pf06008, Pf09831, Pf12128, Pf12795, Pf13514, Pf13851, Pf13868, Pf15070, Pf15558	3913	ENSG00000172037.13	LAMB2	3	Amoebiasis; Pathways in cancer; Toxoplasmosis; Focal adhesion; Small cell lung cancer; ECM-receptor interaction; PI3K-Akt signaling pathway	Focal Adhesion; Focal Adhesion-PI3K-Akt-mTOR-signaling pathway; Primary Focal Segmental Glomerulosclerosis FSGS; Inflammatory Response Pathway; Alpha 6 Beta 4 signaling pathway; miRNA targets in ECM and membrane receptors	0	1.295	2.832	2.483	1.063	3.104	0.769237	0.00716158	0.0163418	0.974239	0.00150803	17.05	16.96	24.52	14.2	10.09	47.5	54.7	142.1	155.7	43.23	17.42
TRUE	High	Master Protein	Q8N5A5	Zinc finger CCCH-type with G patch domain-containing protein OS=Homo sapiens OX=9606 GN=ZGPAT PE=1 SV=3	0	FALSE	7.94	4	2	5	2	1	531	57.3	5.43	10.63	2	metabolic process;regulation of biological process	membrane;nucleus	DNA binding;metal ion binding;protein binding	Pf00642, Pf01585	84619	ENSG00000197114.11	ZGPAT	20			0	0.831	2.087	2.444	1.057	2.195	0.821173	0.114137	0.0282219	0.9666	0.0673501	9.24	46.02	23.64	36.89	22.54	63.8	55	144.3	136.9	19.56	7.23
TRUE	High	Master Protein	Q9H4A5	Golgi phosphoprotein 3-like OS=Homo sapiens OX=9606 GN=GOLPH3L PE=1 SV=1	0	FALSE	26.977	26	4	19	3	1	285	32.7	5.83	35.6	4	cell organization and biogenesis;regulation of biological process;transport	cytosol;Golgi;membrane	protein binding	Pf02350, Pf05719	55204	ENSG00000143457.10	GOLPH3L	1	Transcriptional misregulation in cancer		0	0.946	1.067	2.425	1.469	1.459	0.955824	0.962137	0.0481182	0.481662	0.73987	62.69	25.53	72.12	69.69	20.67	60.5	19.3	126.1	194.2	21.67	126.73
TRUE	High	Master Protein	O14907	Tax1-binding protein 3 OS=Homo sapiens OX=9606 GN=TAX1BP3 PE=1 SV=2	0	FALSE	14.112	28	2	9	2	1	124	13.7	8.48	33.16	2	regulation of biological process;response to stimulus	cytoplasm;cytoskeleton;cytosol;membrane;nucleus	protein binding	Pf00595, Pf13180	30851	ENSG00000213977.7	TAX1BP3	17			0	0.923	1.817	2.406	1.129	2.117	0.92028	0.0202432	3.9167e-05	0.992296	0.00487226	18.58	20.25	17.53	25.41	19.83	68.8	64.1	117.7	149.3	14.72	26.99
TRUE	High	Master Protein	O00151	PDZ and LIM domain protein 1 OS=Homo sapiens OX=9606 GN=PDLIM1 PE=1 SV=4	0	FALSE	160.416	65	15	140	15	1	329	36	7.02	567.11	15	regulation of biological process;response to stimulus	cytoplasm;cytoskeleton	metal ion binding;protein binding	Pf00412, Pf00595, Pf13180	9124	ENSG00000107438.8	PDLIM1	10			0	1.118	2.243	2.39	1.264	3.076	0.253016	1.13715e-07	6.41528e-10	0.611243	3.35161e-16	38.47	71.27	62.48	68.54	50.24	55.1	65.7	125.5	153.7	15.28	10.47
TRUE	High	Master Protein	Q58FF6	Putative heat shock protein HSP 90-beta 4 OS=Homo sapiens OX=9606 GN=HSP90AB4P PE=5 SV=1	0	FALSE	67.899	14	9	283	2	1	505	58.2	4.73	643.76	9	metabolic process;response to stimulus	cytoplasm	nucleotide binding;protein binding	Pf00183, Pf02518, Pf13589	664618		HSP90AB4P	15			0	2.27	1.053	2.375	5.119	5.392	0.00992387	0.975783	0.018734	1.56955e-09	1.35814e-07	0	0	0	0	0	41.2	93.5	43.4	222
TRUE	High	Master Protein	Q5K651	Sterile alpha motif domain-containing protein 9 OS=Homo sapiens OX=9606 GN=SAMD9 PE=1 SV=1	0	FALSE	34.076	10	8	17	8	1	1589	184.2	7.83	31.84	8	cell organization and biogenesis	cytoplasm;cytosol;endosome	nucleotide binding;protein binding	Pf00536, Pf04326, Pf07647	54809	ENSG00000205413.7	SAMD9	7			0	1.237	2.476	2.362	0.986	2.526	0.857613	0.0429774	0.0614486	0.903399	0.0246691	55.16	72.43	43.68	47.76	57.32	40.5	33.7	158.2	167.6	7.33	84.3
TRUE	High	Master Protein	Q03135	Caveolin-1 OS=Homo sapiens OX=9606 GN=CAV1 PE=1 SV=4	0	FALSE	55.762	46	7	59	7	1	178	20.5	6.02	168.36	7	cell communication;cell differentiation;cell organization and biogenesis;cellular component movement;cellular homeostasis;metabolic process;regulation of biological process;response to stimulus;transport	endoplasmic reticulum;endosome;Golgi;membrane	enzyme regulator activity;protein binding;structural molecule activity	Pf01146	857	ENSG00000105974.11	CAV1	7	Endocytosis; Focal adhesion; Proteoglycans in cancer; Bacterial invasion of epithelial cells; Viral myocarditis	Androgen receptor signaling pathway; VEGFA-VEGFR2 Signaling Pathway; TGF-beta Signaling Pathway; Integrin-mediated Cell Adhesion; EGF/EGFR Signaling Pathway; Focal Adhesion	0	0.674	1.323	2.348	1.088	1.547	5.91301e-05	0.380662	1.56628e-06	0.998476	0.0736834	25	89.55	105.48	119.04	102.39	140.3	101	82.3	76.3	45.89	61.84
TRUE	High	Master Protein	Q01628	Interferon-induced transmembrane protein 3 OS=Homo sapiens OX=9606 GN=IFITM3 PE=1 SV=2	0	FALSE	17.786	30	2	14	2	1	133	14.6	7.01	32.6	2	defense response;regulation of biological process;response to stimulus	endosome;membrane;vacuole	protein binding	Pf04505	10410	ENSG00000142089.15	IFITM3	11			0	1.484	0.987	2.341	1.506	2.351	0.0740278	0.998631	0.00160866	0.416114	0.0102327	66.81	35.25	99.44	68.11	89.69	69.2	102.7	59.1	169	41.54	63.93
TRUE	High	Master Protein	Q13576	Ras GTPase-activating-like protein IQGAP2 OS=Homo sapiens OX=9606 GN=IQGAP2 PE=1 SV=4	0	FALSE	41.477	8	8	23	6	1	1575	180.5	5.64	52.38	8	cell organization and biogenesis;regulation of biological process;response to stimulus;transport	cell surface;cytoplasm;cytoskeleton;cytosol;membrane	enzyme regulator activity;protein binding	Pf00307, Pf00616, Pf03836	10788	ENSG00000145703.15	IQGAP2	5	Regulation of actin cytoskeleton	G13 Signaling Pathway	0	0.808	1.639	2.336	0.842	1.506	0.876248	0.451692	0.0948573	0.796027	0.750098	19.97	32.46	44.93	38.61	14.49	97.9	17.3	138.9	145.8	26.16	127.72
TRUE	High	Master Protein	Q08380	Galectin-3-binding protein OS=Homo sapiens OX=9606 GN=LGALS3BP PE=1 SV=1	0	FALSE	140.927	31	14	180	14	1	585	65.3	5.27	616.65	14	defense response;regulation of biological process;response to stimulus;transport	extracellular;membrane;organelle lumen	protein binding;receptor activity	Pf00530, Pf07707	3959	ENSG00000108679.12	LGALS3BP	17			0	1.043	2.08	2.319	1.141	2.424	0.673701	1.72526e-06	3.24905e-09	0.95457	1.15395e-09	45.18	47.56	55.92	54.07	61.07	52.6	68.8	127.6	151	34.73	46.86
TRUE	High	Master Protein	O15530	3-phosphoinositide-dependent protein kinase 1 OS=Homo sapiens OX=9606 GN=PDPK1 PE=1 SV=1	0	FALSE	19.408	12	4	6	4	1	556	63.1	7.36	14.39	4	cell organization and biogenesis;cellular component movement;metabolic process;regulation of biological process;response to stimulus	cytoplasm;cytosol;membrane;nucleus	catalytic activity;enzyme regulator activity;nucleotide binding;protein binding	Pf00069, Pf07714, Pf14531, Pf14593	5170	ENSG00000140992.18	PDPK1	16	T cell receptor signaling pathway; Insulin signaling pathway; FoxO signaling pathway; PPAR signaling pathway; Neurotrophin signaling pathway; Non-small cell lung cancer; Endometrial cancer; Prostate cancer; Thyroid hormone signaling pathway; Toxoplasmosis; Apoptosis; Focal adhesion; Proteoglycans in cancer; Choline metabolism in cancer; AMPK signaling pathway; mTOR signaling pathway; Aldosterone-…	T-Cell antigen Receptor (TCR) Signaling Pathway; PPAR signaling pathway; Focal Adhesion-PI3K-Akt-mTOR-signaling pathway; Angiopoietin Like Protein 8 Regulatory Pathway; Cardiac Hypertrophic Response; Interleukin-11 Signaling Pathway; MicroRNAs in cardiomyocyte hypertrophy; EGF/EGFR Signaling Pathway; Integrin-mediated Cell Adhesion; B Cell Receptor Signaling Pathway; Leptin Insulin Overlap; Signa…	0	0.557	0.911	2.304	1.347	1.163	0.0298427	0.999876	0.0729762	0.877934	0.965214	31.62	24.54	65.46	20.43	22.54	119.3	60.6	90.1	130	25.13	75.42
TRUE	High	Master Protein	O15085	Rho guanine nucleotide exchange factor 11 OS=Homo sapiens OX=9606 GN=ARHGEF11 PE=1 SV=1	0	FALSE	7.186	2	2	3	2	1	1522	167.6	5.5	2.3	2	cell organization and biogenesis;cellular component movement;regulation of biological process;response to stimulus	cytoplasm;cytosol;membrane	enzyme regulator activity;protein binding	Pf00595, Pf00615, Pf00621, Pf09128, Pf13180	9826	ENSG00000132694.18	ARHGEF11	1	Vascular smooth muscle contraction; Pathways in cancer		0	0.78	1.165	2.297	2.022	2.677	0.701481	0.941119	0.00611918	0.0655837	0.00836693	32.83	43.2	132.29	47.91	49.09	49	93.9	68.3	188.9	67.24
TRUE	High	Master Protein	O75954	Tetraspanin-9 OS=Homo sapiens OX=9606 GN=TSPAN9 PE=1 SV=1	0	FALSE	9.251	11	2	2	2	1	239	26.8	7.68	6.38	2	regulation of biological process;response to stimulus	membrane		Pf00335	10867	ENSG00000011105.12	TSPAN9	12			0	0.771	0.991	2.275	1.582	1.319	0.45023	0.995352	0.0461061	0.645115	0.885262	26.11	23.19	11.11	0	1.02	128.6	117.7	105	48.7	46.38	75.65
TRUE	High	Master Protein	Q9NRD1	F-box only protein 6 OS=Homo sapiens OX=9606 GN=FBXO6 PE=1 SV=1	0	FALSE	9.821	17	2	6	2	1	293	33.9	6.09	17.17	2	metabolic process;response to stimulus	cytoplasm;cytosol	catalytic activity;protein binding	Pf00646, Pf04300, Pf12937	26270	ENSG00000116663.10	FBXO6	1	Protein processing in endoplasmic reticulum		0	0.466	0.507	2.269	3.657	1.056	0.0106746	0.309518	0.0773554	2.91867e-05	0.995752	18.96	0	0.34	0	87.83	126.2	24.3	50	199.5		117.75
TRUE	High	Master Protein	Q9P206	Uncharacterized protein KIAA1522 OS=Homo sapiens OX=9606 GN=KIAA1522 PE=1 SV=2	0	FALSE	11.03	5	3	4	3	1	1035	107	9.73	11.6	3	cell differentiation				57648	ENSG00000162522.10	KIAA1522	1			0	0.899	1.462	2.257	1.336	1.768	0.944507	0.651226	0.0791833	0.842158	0.344177	81.2	61.26	63.23	50.42	35.94	73.6	61.1	127.2	138.2	14.27	41.56
TRUE	High	Master Protein	P07902	Galactose-1-phosphate uridylyltransferase OS=Homo sapiens OX=9606 GN=GALT PE=1 SV=3	0	FALSE	10.439	11	2	6	2	1	379	43.3	6.99	17.32	2	metabolic process	cytosol;Golgi	catalytic activity;metal ion binding;protein binding	Pf01087, Pf02744	2592	ENSG00000213930.11	GALT	9	Prolactin signaling pathway; Galactose metabolism; Amino sugar and nucleotide sugar metabolism; Metabolic pathways		0	0.514	0.751	2.243	1.5	1.154	0.0030037	0.941119	0.0832277	0.636653	0.966327	22.48	48	30.09	31.39	83.69	117	60.2	87.9	135	75.48	2.67
TRUE	High	Master Protein	Q16527	Cysteine and glycine-rich protein 2 OS=Homo sapiens OX=9606 GN=CSRP2 PE=1 SV=3	0	FALSE	38.621	47	6	29	6	1	193	20.9	8.62	71.89	6	cell differentiation;development	nucleus	metal ion binding;protein binding	Pf00412	1466	ENSG00000175183.9	CSRP2	12		H19 action Rb-E2F1 signaling and CDK-beta-catenin activity; Mesodermal Commitment Pathway	0	0.979	1.754	2.231	1.227	2.167	0.992692	0.0354629	0.00034276	0.898386	0.00542035	34.1	33.78	35.07	57.98	50.14	64.8	56	138	141.2	20.64	10.82
TRUE	High	Master Protein	Q53FA7	Quinone oxidoreductase PIG3 OS=Homo sapiens OX=9606 GN=TP53I3 PE=1 SV=2	0	FALSE	20.952	18	4	8	4	1	332	35.5	7.17	33.3	4	metabolic process;regulation of biological process	cytosol	catalytic activity;nucleotide binding;protein binding	Pf00107, Pf01455, Pf08240, Pf13602	9540	ENSG00000115129.13	TP53I3	2	p53 signaling pathway		0	0.852	1.823	2.211	0.809	1.779	0.863173	0.127197	0.0102139	0.174476	0.198134	50.21	54.87	77.07	28.04	55.23	62.5	53.9	160.2	123.4	38.08	28.9
TRUE	High	Master Protein	Q00534	Cyclin-dependent kinase 6 OS=Homo sapiens OX=9606 GN=CDK6 PE=1 SV=1	0	FALSE	20.28	17	4	19	3	1	326	36.9	6.46	44.83	4	cell differentiation;cell division;metabolic process;regulation of biological process;response to stimulus	cytoplasm;cytoskeleton;cytosol;nucleus	catalytic activity;nucleotide binding;protein binding	Pf00069, Pf07714	1021	ENSG00000105810.9	CDK6	7	Viral carcinogenesis; Hepatitis B; Pancreatic cancer; MicroRNAs in cancer; Chronic myeloid leukemia; Non-small cell lung cancer; Breast cancer; Pathways in cancer; Glioma; Melanoma; p53 signaling pathway; Measles; Small cell lung cancer; Cell cycle; PI3K-Akt signaling pathway	Metastatic brain tumor; DNA Damage Response; miRNAs involved in DNA damage response; Cell Cycle; Signaling Pathways in Glioblastoma; miRNA Regulation of DNA Damage Response; Retinoblastoma (RB) in Cancer; Wnt Signaling Pathway Netpath; G1 to S cell cycle control	0	0.737	1.895	2.203	0.847	1.683	0.521698	0.163038	0.0193729	0.481177	0.342815	4.31	12.85	16.58	19.51	24.07	70.8	31.5	160.9	136.8	55.08	74.07
TRUE	High	Master Protein	Q8TDB6	E3 ubiquitin-protein ligase DTX3L OS=Homo sapiens OX=9606 GN=DTX3L PE=1 SV=1	0	FALSE	33.237	15	8	15	8	1	740	83.5	8.06	25.55	8	cell organization and biogenesis;metabolic process;regulation of biological process;response to stimulus;transport	cytoplasm;cytosol;endosome;nucleus;vacuole	catalytic activity;enzyme regulator activity;metal ion binding;protein binding;RNA binding	Pf00097, Pf13639, Pf13920, Pf13923, Pf14634, Pf14835	151636	ENSG00000163840.9	DTX3L	3	Notch signaling pathway	Notch Signaling Pathway	0	0.991	1.893	2.188	1.268	2.141	0.990085	0.191978	0.00280652	0.863622	0.0212475	28.99	47.17	78.59	59.62	78.54	24	37.6	134.7	203.7	63.05	61.61
TRUE	High	Master Protein	P52943	Cysteine-rich protein 2 OS=Homo sapiens OX=9606 GN=CRIP2 PE=1 SV=1	0	FALSE	51.895	50	5	50	5	1	208	22.5	8.72	142.99	5	regulation of biological process		metal ion binding;protein binding	Pf00412	1397	ENSG00000182809.10	CRIP2	14			0	0.837	1.927	2.159	0.836	1.623	0.612643	0.00173514	6.34447e-05	0.188835	0.0348451	24.28	48.38	72.81	47.49	68.33	62.6	51.4	156.7	129.4	33.58	18.52
TRUE	High	Master Protein	P45877	Peptidyl-prolyl cis-trans isomerase C OS=Homo sapiens OX=9606 GN=PPIC PE=1 SV=1	0	FALSE	9.911	13	3	16	3	1	212	22.7	8.4	30.48	3	metabolic process	cytoplasm	catalytic activity;protein binding	Pf00160	5480	ENSG00000168938.5	PPIC	5			0	1.141	1.81	2.153	1.307	2.365	0.777376	0.0334464	0.000732501	0.725504	0.000794419	40	11.86	48.77	25.35	29.87	64.9	65.8	122.6	146.7	24.08	50.8
TRUE	High	Master Protein	Q5T0D9	Tumor protein p63-regulated gene 1-like protein OS=Homo sapiens OX=9606 GN=TPRG1L PE=1 SV=1	0	FALSE	17.294	27	3	8	3	1	272	30.2	7.34	16.11	3		membrane	protein binding	Pf12456	127262	ENSG00000158109.14	TPRG1L	1			0	0.931	1.718	2.144	1.127	1.933	0.960998	0.320583	0.0113593	0.998565	0.0946222	44.49	39.79	69.98	31.6	63.82	65.8	42.5	132.4	159.2	96.3	125.89
TRUE	High	Master Protein	Q15654	Thyroid receptor-interacting protein 6 OS=Homo sapiens OX=9606 GN=TRIP6 PE=1 SV=3	0	FALSE	128.593	54	14	60	14	1	476	50.3	7.37	227.17	14	cell organization and biogenesis;metabolic process;regulation of biological process	cytoplasm;cytoskeleton;cytosol;membrane;nucleus	metal ion binding;protein binding;RNA binding	Pf00412	7205	ENSG00000087077.13	TRIP6	7	NOD-like receptor signaling pathway		0	0.85	1.951	2.141	0.912	1.813	0.688668	0.00285747	0.000135971	0.540439	0.00786498	39.71	52.42	48.78	31.98	55.01	76.3	46.3	148.2	129.2	51.34	95.53
TRUE	High	Master Protein	P30038	Delta-1-pyrroline-5-carboxylate dehydrogenase, mitochondrial OS=Homo sapiens OX=9606 GN=ALDH4A1 PE=1 SV=3	0	FALSE	79.013	39	13	49	13	1	563	61.7	8.07	151.79	13	metabolic process	mitochondrion;organelle lumen	catalytic activity;protein binding	Pf00171	8659	ENSG00000159423.16	ALDH4A1	1	Alanine, aspartate and glutamate metabolism; Metabolic pathways; Arginine and proline metabolism		0	0.826	1.569	2.13	1.153	1.851	0.521698	0.121557	0.000842877	0.95457	0.0153869	48.4	65.73	74.35	62.91	71.99	87.2	63.9	127.2	121.7	40.2	19.48
TRUE	High	Master Protein	O14933	Ubiquitin/ISG15-conjugating enzyme E2 L6 OS=Homo sapiens OX=9606 GN=UBE2L6 PE=1 SV=4	0	FALSE	35.658	57	5	31	5	1	153	17.8	7.88	105.98	5	metabolic process;regulation of biological process;response to stimulus	cytosol	catalytic activity;protein binding	Pf00179	9246	ENSG00000156587.15	UBE2L6	11	Ubiquitin mediated proteolysis; Parkinson's disease	Parkinsons Disease Pathway; Parkin-Ubiquitin Proteasomal System pathway	0	0.993	1.685	2.089	1.298	2.389	0.986042	0.0732563	0.00141191	0.679505	0.000230118	39.91	41.67	80.23	81.39	52.8	75.6	79.9	117.2	127.3	23.46	17.75
TRUE	High	Master Protein	O95786	Probable ATP-dependent RNA helicase DDX58 OS=Homo sapiens OX=9606 GN=DDX58 PE=1 SV=2	0	FALSE	36.852	10	7	16	7	1	925	106.5	6.4	33.27	7	defense response;metabolic process;regulation of biological process;response to stimulus	cytoplasm;cytoskeleton;cytosol;membrane	catalytic activity;DNA binding;metal ion binding;nucleotide binding;protein binding;RNA binding	Pf00270, Pf00271, Pf04851, Pf11648	23586	ENSG00000107201.9	DDX58	9	Hepatitis B; Epstein-Barr virus infection; NF-kappa B signaling pathway; Cytosolic DNA-sensing pathway; Measles; Herpes simplex infection; Hepatitis C; RIG-I-like receptor signaling pathway; Influenza A	RIG-I-like Receptor Signaling	0	0.957	1.64	2.072	1.2	1.805	0.987145	0.279478	0.00645078	0.939065	0.123245	45.48	42.43	57.09	41.67	42.76	83.8	53.8	127.1	135.3	31.52	11.92
TRUE	High	Master Protein	O15327	Type II inositol 3,4-bisphosphate 4-phosphatase OS=Homo sapiens OX=9606 GN=INPP4B PE=1 SV=4	0	FALSE	29.001	10	5	11	5	1	924	104.7	6.27	32.02	5	metabolic process;regulation of biological process;response to stimulus	cytoplasm;cytosol	catalytic activity;protein binding		8821	ENSG00000109452.12	INPP4B	4	Phosphatidylinositol signaling system; Inositol phosphate metabolism; Metabolic pathways	VEGFA-VEGFR2 Signaling Pathway	0	0.808	2.086	2.063	1.089	2.081	0.720327	0.0272108	0.00780948	0.982414	0.0289371	26.77	51.81	45.2	51.06	52.41	72.5	42.9	205.2	79.3	52.95	47.06
TRUE	High	Master Protein	Q8N3E9	1-phosphatidylinositol 4,5-bisphosphate phosphodiesterase delta-3 OS=Homo sapiens OX=9606 GN=PLCD3 PE=1 SV=3	0	FALSE	72.595	23	11	36	11	1	789	89.2	6.98	111.36	11	metabolic process;regulation of biological process;response to stimulus	cytoplasm;cytosol;membrane	catalytic activity;metal ion binding;protein binding;signal transducer activity	Pf00168, Pf00169, Pf00387, Pf00388, Pf09279, Pf14788	113026	ENSG00000161714.11	PLCD3	17	Thyroid hormone signaling pathway; Phosphatidylinositol signaling system; AGE-RAGE signaling pathway in diabetic complications; Inositol phosphate metabolism; Metabolic pathways; Calcium signaling pathway	GPR40 PATHWAY	0	1.194	2.849	2.06	0.894	2.529	0.314298	2.72048e-06	0.000768374	0.516593	7.35884e-05	50.89	43.9	70.38	37.85	60.77	57.2	47.1	180.7	115	24.25	30.62
TRUE	High	Master Protein	Q9NZN4	EH domain-containing protein 2 OS=Homo sapiens OX=9606 GN=EHD2 PE=1 SV=2	0	FALSE	123.677	54	18	103	16	1	543	61.1	6.46	344.45	18	cell organization and biogenesis;coagulation;regulation of biological process;transport	cytoplasm;cytoskeleton;cytosol;endosome;membrane;nucleus	catalytic activity;metal ion binding;nucleotide binding;protein binding	Pf00350, Pf01926, Pf12763	30846	ENSG00000024422.11	EHD2	19	Endocytosis	Insulin Signaling	0	0.925	2.732	2.05	0.795	2.126	0.929482	8.87177e-07	6.84229e-05	0.0297606	9.57831e-05	42.67	35.8	58.22	30.98	48	57.2	53.1	179	110.7	5.74	18.35
TRUE	High	Master Protein	Q12955	Ankyrin-3 OS=Homo sapiens OX=9606 GN=ANK3 PE=1 SV=3	0	FALSE	28.286	2	7	12	5	1	4377	480.1	6.49	11.95	7	cell organization and biogenesis;regulation of biological process;response to stimulus;transport	cell surface;cytoplasm;cytoskeleton;cytosol;endoplasmic reticulum;Golgi;membrane;vacuole	protein binding;structural molecule activity	Pf00023, Pf00531, Pf00791, Pf12796, Pf13606, Pf13637, Pf13857	288	ENSG00000151150.21	ANK3	10	Proteoglycans in cancer		2	1.317	1.725	2.036	1.222	2.102	0.687937	0.375687	0.0964597	0.927484	0.101809	41.81	54.9	26.18	35.43	36.18	35.8	51.6	137	175.6	81.23	39.16
TRUE	High	Master Protein	Q9UFN0	Protein NipSnap homolog 3A OS=Homo sapiens OX=9606 GN=NIPSNAP3A PE=1 SV=2	0	FALSE	23.961	28	5	13	5	1	247	28.4	9.16	38.79	5		cytoplasm;cytosol;mitochondrion;nucleus	protein binding	Pf07978	25934	ENSG00000136783.9	NIPSNAP3A	9			0	0.834	1.93	2.034	0.983	1.842	0.602735	0.0121483	0.0018823	0.817688	0.0304083	46.1	61.11	47.88	43.88	63.82	118.8	52.4	126	102.8	44.41	47.1
TRUE	High	Master Protein	P08727	Keratin, type I cytoskeletal 19 OS=Homo sapiens OX=9606 GN=KRT19 PE=1 SV=4	0	FALSE	441.283	87	39	1642	26	1	400	44.1	5.14	4931.28	39	cell death;cell differentiation;cell organization and biogenesis;regulation of biological process;response to stimulus	cytoskeleton;cytosol;membrane	protein binding;structural molecule activity	Pf00038	3880	ENSG00000171345.13	KRT19	17			13	0.854	1.976	2.021	0.911	1.725	0.23424	9.69058e-06	2.26179e-06	0.330377	0.000794561	33.68	53.93	55.51	51.92	52.66	69.4	60.5	146.7	123.4	3.69	11.82
TRUE	High	Master Protein	Q02252	Methylmalonate-semialdehyde dehydrogenase [acylating], mitochondrial OS=Homo sapiens OX=9606 GN=ALDH6A1 PE=1 SV=2	0	FALSE	88.223	42	18	49	18	1	535	57.8	8.5	117.54	18	cell differentiation;metabolic process	mitochondrion;organelle lumen	catalytic activity;RNA binding	Pf00171	4329	ENSG00000119711.12	ALDH6A1	14	Propanoate metabolism; Carbon metabolism; beta-Alanine metabolism; Inositol phosphate metabolism; Metabolic pathways; Valine, leucine and isoleucine degradation		0	0.999	1.948	2.01	1.003	1.955	0.972478	0.00981957	0.00259186	0.901563	0.00664136	58.78	54.46	62.5	56.27	54.21	57.3	68.8	134.9	139.1	16.24	35.22
TRUE	High	Master Protein	Q9NZ08	Endoplasmic reticulum aminopeptidase 1 OS=Homo sapiens OX=9606 GN=ERAP1 PE=1 SV=3	0	FALSE	38.34	10	9	14	9	1	941	107.2	6.46	30.6	9	cell communication;cell differentiation;metabolic process;regulation of biological process;response to stimulus	cytoplasm;cytosol;endoplasmic reticulum;extracellular;membrane;organelle lumen	catalytic activity;metal ion binding;protein binding	Pf01433, Pf11838, Pf13485	51752	ENSG00000164307.12	ERAP1	5			0	0.915	1.446	2.005	1.223	2.096	0.931016	0.488085	0.00848526	0.918988	0.026145	33.76	75.09	84.08	70.45	64.83	56.1	70.6	115.5	157.8	41.97	66.44
TRUE	High	Master Protein	Q460N5	Protein mono-ADP-ribosyltransferase PARP14 OS=Homo sapiens OX=9606 GN=PARP14 PE=1 SV=3	0	FALSE	51.425	7	11	22	11	1	1801	202.7	7.18	50.35	11	metabolic process;regulation of biological process	cytoplasm;cytosol;membrane;nucleus	catalytic activity;nucleotide binding;protein binding;RNA binding	Pf00644, Pf01661	54625	ENSG00000173193.13	PARP14	3			0	0.805	1.718	2.004	1.206	2.251	0.764407	0.271764	0.0188576	0.930559	0.0099476	50.64	57.05	65.93	44.47	62.29	41	45.8	159	154.3	46.24	33.16
TRUE	High	Master Protein	P28799	Granulins OS=Homo sapiens OX=9606 GN=GRN PE=1 SV=2	0	FALSE	22.794	14	3	12	3	1	593	63.5	6.83	34.44	3	regulation of biological process;response to stimulus;transport	endoplasmic reticulum;endosome;extracellular;organelle lumen;vacuole	protein binding;RNA binding	Pf00396	2896	ENSG00000030582.17	GRN	17		Integrated Breast Cancer Pathway	0	1.046	1.494	2	1.104	1.723	0.94086	0.545527	0.0105361	0.998476	0.205683	80.22	39.09	44.5	39.26	69.7	52.1	85.7	140.1	122.2	49.65	34.72
TRUE	High	Master Protein	Q9UDX5	Mitochondrial fission process protein 1 OS=Homo sapiens OX=9606 GN=MTFP1 PE=1 SV=1	0	FALSE	10.213	7	2	8	2	1	166	18	9.31	17.77	2	cell death;cell organization and biogenesis;response to stimulus	membrane;mitochondrion		Pf10558	51537	ENSG00000242114.5	MTFP1	22			0	1.197	0.879	0.492	0.947	0.727	0.708821	0.999876	0.0295956	0.907732	0.695516	51.61	45.16	14.98	85.68	38.66	93.8	152.8	68.2	85.2	57.54	41.85
TRUE	High	Master Protein	Q9H2D6	TRIO and F-actin-binding protein OS=Homo sapiens OX=9606 GN=TRIOBP PE=1 SV=3	0	FALSE	54.508	6	10	28	10	1	2365	261.2	8.48	80.7	10	cell division;cell organization and biogenesis;metabolic process;regulation of biological process	cytoplasm;cytoskeleton;nucleus	protein binding;RNA binding	Pf00169, Pf04156, Pf04514, Pf05109, Pf05110, Pf11559	11078	ENSG00000100106.19	TRIOBP	22			0	1.128	0.568	0.492	0.971	0.535	0.548998	0.279478	0.00038519	0.836766	0.0298086	52.96	13.59	18.86	97.16	26.46	129.5	138.7	69.6	62.2	22.54	29.73
TRUE	High	Master Protein	Q96B97	SH3 domain-containing kinase-binding protein 1 OS=Homo sapiens OX=9606 GN=SH3KBP1 PE=1 SV=2	0	FALSE	92.273	28	14	56	14	1	665	73.1	6.62	191.56	14	cell communication;cell death;cell organization and biogenesis;cellular component movement;metabolic process;regulation of biological process;transport	cytoplasm;cytoskeleton;cytosol;membrane	catalytic activity;protein binding	Pf00018, Pf07653, Pf14604	30011	ENSG00000147010.17	SH3KBP1	X	Endocytosis	EGF/EGFR Signaling Pathway	0	0.953	0.567	0.489	1	0.499	0.981907	0.181004	3.67755e-05	0.872949	0.000642927	41.61	21.17	16.49	59.12	18.19	147.9	124.5	64.7	62.9	10.83	18.29
TRUE	High	Master Protein	P13995	Bifunctional methylenetetrahydrofolate dehydrogenase/cyclohydrolase, mitochondrial OS=Homo sapiens OX=9606 GN=MTHFD2 PE=1 SV=2	0	FALSE	129.294	59	13	105	13	1	350	37.9	8.73	342.12	13	metabolic process	cytosol;mitochondrion;organelle lumen	catalytic activity;metal ion binding	Pf00763, Pf02882	10797	ENSG00000065911.11	MTHFD2	2	One carbon pool by folate; Metabolic pathways	Nucleotide Metabolism; Folate Metabolism; Trans-sulfuration and one carbon metabolism; One Carbon Metabolism	0	1.131	0.458	0.482	1.077	0.571	0.11557	0.0148571	3.45528e-07	0.964931	0.0118127	46.52	11.85	14.53	60.87	18.37	115.3	149.7	63.7	71.2	18.71	8.6
TRUE	High	Master Protein	O15260	Surfeit locus protein 4 OS=Homo sapiens OX=9606 GN=SURF4 PE=1 SV=3	0	FALSE	14.963	12	3	14	3	1	269	30.4	7.78	40.59	3	cell organization and biogenesis;regulation of biological process;transport	endoplasmic reticulum;Golgi;membrane	protein binding	Pf02077	6836	ENSG00000280951.2; ENSG00000148248.13	SURF4	9; CHR_HG2030_PATCH			0	1.009	1.014	0.478	0.973	0.707	0.924848	0.953519	1.13706e-05	0.812717	0.279665	39.35	39.7	28.55	112.53	49.05	121.9	121	104.8	52.3	22.64	10.62
TRUE	High	Master Protein	P21579	Synaptotagmin-1 OS=Homo sapiens OX=9606 GN=SYT1 PE=1 SV=1	0	FALSE	21.109	11	4	22	4	1	422	47.5	8.12	57.91	4	cell communication;cell differentiation;cell organization and biogenesis;regulation of biological process;response to stimulus;transport	cytoplasm;Golgi;membrane	metal ion binding;protein binding	Pf00168	6857	ENSG00000067715.13	SYT1	12	Synaptic vesicle cycle	Synaptic Vesicle Pathway	0	0.978	0.435	0.47	1.106	0.4	0.996143	0.0191052	0.000206295	0.999666	0.000267565	36.88	6.76	7.86	42.38	6.38	170.3	151.4	38.6	39.7	56.18	54.09
TRUE	High	Master Protein	P11166	Solute carrier family 2, facilitated glucose transporter member 1 OS=Homo sapiens OX=9606 GN=SLC2A1 PE=1 SV=2	0	FALSE	33.126	14	7	53	6	1	492	54	8.72	133.37	7	cell communication;cell organization and biogenesis;metabolic process;regulation of biological process;response to stimulus;transport	cytoplasm;cytoskeleton;cytosol;membrane;nucleus	protein binding;transporter activity	Pf00083, Pf07690, Pf13347	6513	ENSG00000117394.20	SLC2A1	1	HIF-1 signaling pathway; Central carbon metabolism in cancer; Bile secretion; Pathways in cancer; Thyroid hormone signaling pathway; Insulin secretion; Renal cell carcinoma; Glucagon signaling pathway; HTLV-I infection; Insulin resistance; Adipocytokine signaling pathway	Cori Cycle; Photodynamic therapy-induced HIF-1 survival signaling; Insulin Signaling; NRF2 pathway; Angiopoietin Like Protein 8 Regulatory Pathway; Glycolysis and Gluconeogenesis; Focal Adhesion-PI3K-Akt-mTOR-signaling pathway	1	1.055	0.491	0.463	1.016	0.508	0.747369	0.0382107	2.26179e-06	0.913522	0.00230573	35.21	9.55	13.29	41.6	12.24	136	132.5	68.2	63.4	14.03	5.84
TRUE	High	Master Protein	Q9UMX0	Ubiquilin-1 OS=Homo sapiens OX=9606 GN=UBQLN1 PE=1 SV=2	0	FALSE	38.975	18	6	18	3	1	589	62.5	5.11	65.13	6	cell communication;cell organization and biogenesis;metabolic process;regulation of biological process;response to stimulus	cytoplasm;cytosol;endoplasmic reticulum;membrane;nucleus;proteasome;vacuole	protein binding	Pf00240, Pf00627, Pf11976	29979	ENSG00000135018.13	UBQLN1	9	Protein processing in endoplasmic reticulum		1	1.117	0.907	0.46	0.968	0.914	0.897005	0.999876	0.0603888	0.920331	0.966327	93.29	64.75	14.38	88.35	59.82	133.8	105.5	70.9	89.8	67.36	72.53
TRUE	High	Master Protein	P13611	Versican core protein OS=Homo sapiens OX=9606 GN=VCAN PE=1 SV=3	0	FALSE	12.734	1	2	5	2	1	3396	372.6	4.51	10.35	2	cell differentiation;cell organization and biogenesis;cellular component movement;development;metabolic process	extracellular;membrane;organelle lumen	metal ion binding;protein binding;structural molecule activity	Pf00008, Pf00059, Pf00084, Pf00193, Pf07645, Pf12947	1462	ENSG00000038427.15	VCAN	5	Cell adhesion molecules (CAMs)	Spinal Cord Injury	0	1.298	0.481	0.46	1.084	0.622	0.682216	0.354714	0.0775612	0.998476	0.702404	16.76	16.61	13.39	50.28	27.04	94.5	172.6	88.5	44.4	31.54	43.1
TRUE	High	Master Protein	P31146	Coronin-1A OS=Homo sapiens OX=9606 GN=CORO1A PE=1 SV=4	0	FALSE	15.656	10	3	3	3	1	461	51	6.68	6.98	3	cell organization and biogenesis;cellular component movement;defense response;regulation of biological process;response to stimulus;transport	cytoplasm;cytoskeleton;cytosol;endosome;membrane;nucleus	protein binding;RNA binding	Pf00400, Pf08953, Pf08954, Pf13094, Pf13863	11151	ENSG00000102879.15	CORO1A	16	Tuberculosis; Phagosome		0	1.449	0.473	0.44	1.024	0.479	0.0975909	0.284541	0.0275327	0.95457	0.0847455	63.76	15.13	14.48	73.05	19.46	114	158.3	65.5	62.2	46.3	17.38
TRUE	High	Master Protein	Q5C9Z4	Nucleolar MIF4G domain-containing protein 1 OS=Homo sapiens OX=9606 GN=NOM1 PE=1 SV=1	0	FALSE	15.027	6	3	3	3	1	860	96.2	8.1	8.77	3	cell differentiation	nucleus	protein binding;RNA binding	Pf02847, Pf02854	64434	ENSG00000146909.7	NOM1	7			0	2.042	1.047	0.437	0.83	1.077	0.000180655	0.980861	0.0306161	0.741151	0.998399	72.19	75.92	19.17	60.17	82.9	56.9	246.7	83.9	12.5	67.17	57.06
TRUE	High	Master Protein	O95249	Golgi SNAP receptor complex member 1 OS=Homo sapiens OX=9606 GN=GOSR1 PE=1 SV=1	0	FALSE	21.431	16	4	15	4	1	250	28.6	9.42	42.26	4	cell organization and biogenesis;regulation of biological process;transport	cytosol;Golgi;membrane	protein binding	Pf12352	9527	ENSG00000108587.15	GOSR1	17	SNARE interactions in vesicular transport		0	0.888	0.555	0.435	0.499	0.206	0.860405	0.318921	1.33205e-05	8.04344e-05	2.27612e-12	48.16	26.26	26.19	31.27	5.68	152.4	171.2	62.5	13.9	17.32	22.42
TRUE	High	Master Protein	Q96QZ7	Membrane-associated guanylate kinase, WW and PDZ domain-containing protein 1 OS=Homo sapiens OX=9606 GN=MAGI1 PE=1 SV=3	0	FALSE	15.506	5	4	5	4	1	1491	164.5	7.58	8.3	4	cell death;cell organization and biogenesis;regulation of biological process;response to stimulus	cytoplasm;membrane;nucleus	nucleotide binding;protein binding;structural molecule activity	Pf00397, Pf00595, Pf00625, Pf13180	9223		MAGI1	3	Tight junction; Rap1 signaling pathway	Pathways Affected in Adenoid Cystic Carcinoma	0	1.197	0.518	0.426	0.933	0.693	0.77245	0.343511	0.0349367	0.927076	0.702404	53.44	10.75	14.48	1.16	14.91	151.8	153.8	48.3	46	39.07	58.74
TRUE	High	Master Protein	P01116	GTPase KRas OS=Homo sapiens OX=9606 GN=KRAS PE=1 SV=1	0	FALSE	54.942	58	8	51	2	1	189	21.6	6.77	185.23	8	cell communication;cell differentiation;cell organization and biogenesis;cellular component movement;metabolic process;regulation of biological process;response to stimulus	cytoplasm;cytosol;membrane;mitochondrion	catalytic activity;nucleotide binding;protein binding	Pf00071, Pf02421, Pf08477	3845	ENSG00000133703.11	KRAS	12	Viral carcinogenesis; Serotonergic synapse; Longevity regulating pathway - multiple species; T cell receptor signaling pathway; Dorso-ventral axis formation; Tight junction; Hepatitis B; Insulin signaling pathway; Central carbon metabolism in cancer; Pancreatic cancer; FoxO signaling pathway; Prolactin signaling pathway; MicroRNAs in cancer; Phospholipase D signaling pathway; Chronic myeloid leuk…	BDNF-TrkB Signaling; Oncostatin M Signaling Pathway; Aryl Hydrocarbon Receptor; Serotonin Receptor 2 and ELK-SRF/GATA4 signaling; Integrated Breast Cancer Pathway; ErbB Signaling Pathway; MAPK Cascade; TNF alpha Signaling Pathway; Regulation of Actin Cytoskeleton; Focal Adhesion-PI3K-Akt-mTOR-signaling pathway; PI3K-AKT-mTOR signaling pathway and therapeutic opportunities; Extracellular vesicle-m…	0	0.854	0.621	0.425	0.797	0.445	0.761948	0.613861	0.000183333	0.595619	0.0101988	25.67	29.21	6.32	37.61	8.83	160.1	129.6	61.4	48.9	32.95	16.31
TRUE	High	Master Protein	P31949	Protein S100-A11 OS=Homo sapiens OX=9606 GN=S100A11 PE=1 SV=2	0	FALSE	40.106	65	5	20	5	1	105	11.7	7.12	68.24	5	regulation of biological process;response to stimulus;transport	cytoplasm;extracellular;nucleus;organelle lumen	metal ion binding;protein binding	Pf00036, Pf01023, Pf13499, Pf13833	6282	ENSG00000163191.5	S100A11	1			0	0.701	0.429	0.421	0.997	0.293	0.00165479	0.00877866	2.89984e-06	0.85867	1.60708e-08	30.39	23.57	15.81	105.38	7.84	111.9	144.7	92.8	50.6	53.78	51.15
TRUE	High	Master Protein	Q8N0V3	Putative ribosome-binding factor A, mitochondrial OS=Homo sapiens OX=9606 GN=RBFA PE=1 SV=3	0	FALSE	28.838	24	4	16	4	1	343	38.3	7.85	65.97	4	metabolic process	mitochondrion	catalytic activity;protein binding	Pf02033, Pf02637	79863	ENSG00000101546.12	RBFA	18			0	0.952	0.957	0.419	0.325	0.393	0.981907	0.999876	0.0266118	5.41024e-05	0.0604669	38.55	29.8	7.17	9.79	7.16	114.7	116.6	108	60.7	17.09	7.6
TRUE	High	Master Protein	Q99988	Growth/differentiation factor 15 OS=Homo sapiens OX=9606 GN=GDF15 PE=1 SV=3	0	FALSE	42.177	39	8	24	8	1	308	34.1	9.66	63.9	8	cell communication;regulation of biological process;response to stimulus	cytoplasm;extracellular;nucleus	protein binding	Pf00019	9518	ENSG00000130513.6	GDF15	19			0	0.957	0.24	0.419	1.476	0.335	0.989905	1.80015e-08	6.12369e-06	0.771037	6.40944e-06	59.27	4.13	11.9	90.73	8.15	181.8	159.8	34.9	23.5	30.85	27.99
TRUE	High	Master Protein	P29317	Ephrin type-A receptor 2 OS=Homo sapiens OX=9606 GN=EPHA2 PE=1 SV=2	0	FALSE	123.387	30	18	80	17	1	976	108.2	6.23	216.95	18	cell death;cell differentiation;cell organization and biogenesis;cell proliferation;cellular component movement;defense response;development;metabolic process;regulation of biological process;response to stimulus	cell surface;membrane	catalytic activity;nucleotide binding;protein binding;receptor activity;signal transducer activity	Pf00041, Pf00069, Pf00536, Pf01404, Pf07647, Pf07699, Pf07714, Pf09294, Pf14575	1969	ENSG00000142627.12	EPHA2	1	Rap1 signaling pathway; Ras signaling pathway; Axon guidance; PI3K-Akt signaling pathway	NRF2 pathway; Focal Adhesion-PI3K-Akt-mTOR-signaling pathway	1	0.975	0.402	0.416	1.017	0.408	0.98899	0.000443949	1.97505e-08	0.919559	1.05595e-06	37.1	9.96	11.02	50.55	12.04	148.1	135	63.8	53	10.91	8.18
TRUE	High	Master Protein	Q9NX24	H/ACA ribonucleoprotein complex subunit 2 OS=Homo sapiens OX=9606 GN=NHP2 PE=1 SV=1	0	FALSE	14.357	50	3	3	3	1	153	17.2	8.22	9.74	3	cell organization and biogenesis;metabolic process	nucleus	protein binding;RNA binding	Pf01248	55651	ENSG00000145912.8	NHP2	5	Ribosome biogenesis in eukaryotes		0	2.657	1.395	0.409	0.657	0.698	3.76314e-10	0.732969	0.000373596	0.311495	0.715295	81.5	85.71	0	48.71	20.72	70.7	205	75	49.3	59.72
TRUE	High	Master Protein	Q96SW2	Protein cereblon OS=Homo sapiens OX=9606 GN=CRBN PE=1 SV=1	0	FALSE	12.752	12	3	4	3	1	442	50.5	5.63	9.58	3	metabolic process;regulation of biological process	cytoplasm;membrane;nucleus	catalytic activity;metal ion binding;protein binding	Pf02190	51185	ENSG00000113851.14	CRBN	3			0	1.388	0.951	0.406	0.562	0.54	0.175472	0.999876	0.00142016	0.0756593	0.21002	61.33	48.99	19.66	36.86	29.03	82.8	162.8	116.1	38.3	40.83	9.7
TRUE	High	Master Protein	Q96HA7	Tonsoku-like protein OS=Homo sapiens OX=9606 GN=TONSL PE=1 SV=2	0	FALSE	17.681	8	4	7	4	1	1378	150.8	6.42	14.22	4	metabolic process;regulation of biological process;response to stimulus	cytoplasm;nucleus	protein binding	Pf00023, Pf12796, Pf13414, Pf13424, Pf13606, Pf13637, Pf13855, Pf13857	4796	ENSG00000160949.16	TONSL	8			0	1.058	0.22	0.404	2.017	0.428	0.979547	0.00757748	0.073637	0.642498	0.221549	5.21	0.49	0	0	0.95	187.9	107.2	61.6	43.4	81.13
TRUE	High	Master Protein	O00767	Acyl-CoA desaturase OS=Homo sapiens OX=9606 GN=SCD PE=1 SV=2	0	FALSE	53.388	22	7	31	7	1	359	41.5	9	114.68	7	metabolic process;regulation of biological process	endoplasmic reticulum;membrane	catalytic activity;metal ion binding	Pf00487	6319	ENSG00000099194.5	SCD	10	PPAR signaling pathway; AMPK signaling pathway; Biosynthesis of unsaturated fatty acids; Fatty acid metabolism	Angiopoietin Like Protein 8 Regulatory Pathway; Liver X Receptor Pathway; Fatty Acid Biosynthesis; PPAR signaling pathway; Sterol Regulatory Element-Binding Proteins (SREBP) signalling; SREBF and miR33 in cholesterol and lipid homeostasis; Adipogenesis	0	0.991	0.559	0.403	0.842	0.516	0.950418	0.122172	9.3342e-09	0.305753	0.00105743	52.9	15.4	14.79	68.84	21.3	116.8	152.2	54.8	76.3	49.64	6.99
TRUE	High	Master Protein	Q9NYP9	Protein Mis18-alpha OS=Homo sapiens OX=9606 GN=MIS18A PE=1 SV=1	0	FALSE	7.157	19	2	3	2	1	233	25.8	5.2	3.29	2	cell division;cell organization and biogenesis;regulation of biological process	chromosome;cytosol;nucleus	metal ion binding;protein binding	Pf03226	54069	ENSG00000159055.3	MIS18A	21			0	1.181	0.01	0.402	100	0.53	0.876913	3.81902e-16	0.0681387	3.05343e-16	0.483677	25.47		2.82		0.67	140.4	185.1		74.5	19.86	16.51
TRUE	High	Master Protein	Q96MX6	WD repeat-containing protein 92 OS=Homo sapiens OX=9606 GN=WDR92 PE=1 SV=1	0	FALSE	15.27	14	3	5	3	1	357	39.7	8.09	12.72	3	cell death		protein binding		116143	ENSG00000243667.6	WDR92	2			0	1.448	1.884	0.401	1.084	1.922	0.48147	0.433549	0.0187079	0.991723	0.478805	38.13	44.17	20.02	65.92	52.76	82.8	100.1	75.8	141.3	16.33	109.93
TRUE	High	Master Protein	Q96B36	Proline-rich AKT1 substrate 1 OS=Homo sapiens OX=9606 GN=AKT1S1 PE=1 SV=1	0	FALSE	7.152	9	2	4	2	1	256	27.4	4.75	9.1	2	cell organization and biogenesis;regulation of biological process;response to stimulus	cytoplasm;cytosol;nucleus	protein binding		84335	ENSG00000204673.10	AKT1S1	19	Longevity regulating pathway - multiple species; AMPK signaling pathway; mTOR signaling pathway; Longevity regulating pathway	Focal Adhesion-PI3K-Akt-mTOR-signaling pathway; Senescence and Autophagy in Cancer; Target Of Rapamycin (TOR) Signaling; VEGFA-VEGFR2 Signaling Pathway	0	0.797	0.604	0.4	0.544	0.374	0.58001	0.636687	0.0113593	0.0633915	0.00199374	46.76	28.88	29.27	43.07	17.88	183.6	114.1	56.6	45.6	58.56	47.89
TRUE	High	Master Protein	Q15542	Transcription initiation factor TFIID subunit 5 OS=Homo sapiens OX=9606 GN=TAF5 PE=1 SV=3	0	FALSE	11.965	6	2	2	2	1	800	86.8	5.64	7.97	2	cell organization and biogenesis;metabolic process;regulation of biological process	cytoskeleton;nucleus	catalytic activity;DNA binding;protein binding	Pf00400, Pf04494, Pf08662	6877	ENSG00000148835.10	TAF5	10	Basal transcription factors; Herpes simplex infection	Eukaryotic Transcription Initiation	0	2.508	0.01	0.398	100	0.998	0.00196719	3.81902e-16	0.0275327	3.05343e-16	0.985678	25.74		3.47		0	88.8	222.7		88.6		42.24
TRUE	High	Master Protein	Q8IXK0	Polyhomeotic-like protein 2 OS=Homo sapiens OX=9606 GN=PHC2 PE=1 SV=1	0	FALSE	18.157	6	4	8	4	1	858	90.7	8.69	21.49	4	development	nucleus	DNA binding;metal ion binding;protein binding	Pf00536, Pf07647	1912	ENSG00000134686.18	PHC2	1			0	1.031	0.825	0.39	0.331	0.481	0.958109	0.96374	0.000136298	0.000232691	0.0419328	40.18	80.28	14.47	7.59	13.41	134.7	137.9	84.5	42.9	23.07	29.51
TRUE	High	Master Protein	Q9ULC5	Long-chain-fatty-acid--CoA ligase 5 OS=Homo sapiens OX=9606 GN=ACSL5 PE=1 SV=1	0	FALSE	181.721	52	26	173	25	1	683	75.9	6.92	543.31	26	metabolic process;regulation of biological process	endoplasmic reticulum;membrane;mitochondrion;nucleus	catalytic activity;nucleotide binding	Pf00501	51703	ENSG00000197142.10	ACSL5	10	Peroxisome; Fatty acid degradation; PPAR signaling pathway; Fatty acid biosynthesis; Metabolic pathways; Adipocytokine signaling pathway; Fatty acid metabolism	PPAR signaling pathway; Fatty Acid Beta Oxidation; Fatty Acid Biosynthesis	1	1	0.382	0.386	1.039	0.378	0.874064	0.000125459	2.56012e-12	0.919559	1.26263e-09	51.8	9.79	11.69	87.35	9.65	143.3	151.7	53.3	51.7	28.06	35.73
TRUE	High	Master Protein	Q8NFQ8	Torsin-1A-interacting protein 2 OS=Homo sapiens OX=9606 GN=TOR1AIP2 PE=1 SV=1	0.001	FALSE	5.877	7	2	2	2	1	470	51.2	4.96	5.21	2	cell organization and biogenesis;regulation of biological process	endoplasmic reticulum;membrane;nucleus	enzyme regulator activity;protein binding	Pf05609	163590	ENSG00000169905.12	TOR1AIP2	1			0	0.957	0.01	0.386	100	0.553	0.987145	3.81902e-16	0.0189159	3.05343e-16	0.456172	45.27		9.85		24.98	158.9	205.5		35.6	61.75	54.68
TRUE	High	Master Protein	A0JLT2	Mediator of RNA polymerase II transcription subunit 19 OS=Homo sapiens OX=9606 GN=MED19 PE=1 SV=2	0	FALSE	21.432	31	3	6	3	1	244	26.3	9.82	24.37	3	metabolic process;regulation of biological process	nucleus	protein binding	Pf10278	219541		MED19	11			0	1.152	0.772	0.385	0.572	0.645	0.746909	0.889563	4.92043e-05	0.00228177	0.383935	75.41	34.93	13.97	31.79	41.83	95.5	121.5	127.4	55.7	54.42	72.9
TRUE	High	Master Protein	Q9H5K3	Protein O-mannose kinase OS=Homo sapiens OX=9606 GN=POMK PE=1 SV=1	0	FALSE	14.176	11	2	7	2	1	350	40	6.1	15.18	2	cellular component movement;metabolic process;response to stimulus	endoplasmic reticulum;membrane	catalytic activity;nucleotide binding	Pf00069, Pf07714	84197	ENSG00000185900.9	POMK; SGK196	8			0	0.722	0.544	0.384	0.583	0.335	0.0781222	0.230757	3.07457e-05	0.0504212	4.67516e-05	55.46	15	19.31	20.11	6.95	149.2	121.4	83.2	46.1	44.91	58.77
TRUE	High	Master Protein	Q9BUA3	Spindlin interactor and repressor of chromatin-binding protein OS=Homo sapiens OX=9606 GN=SPINDOC PE=1 SV=3	0	FALSE	20.359	9	2	4	2	1	381	41	5.01	13.91	2					144097	ENSG00000168005.8	C11orf84	11			0	1.036	3.232	0.382	0.177	0.573	0.987145	0.0320715	0.066931	7.12667e-07	0.611121	5.4	86.63	11.09	2.41	17.26	85.8	88.9	191.3	33.9	38.95
TRUE	High	Master Protein	Q9ULF5	Zinc transporter ZIP10 OS=Homo sapiens OX=9606 GN=SLC39A10 PE=1 SV=2	0	FALSE	30.727	10	6	16	6	1	831	94.1	6.76	30.61	6	cellular homeostasis;regulation of biological process;transport	membrane	transporter activity	Pf02535, Pf14667	57181	ENSG00000196950.13	SLC39A10	2		NRF2 pathway; Zinc homeostasis	0	0.828	0.185	0.368	1.522	0.302	0.530915	2.77284e-10	2.02649e-06	0.738643	4.45696e-06	34.33	1.88	9.73	68.51	7.73	169.3	176.6	33	21.1	72.53	61.04
TRUE	High	Master Protein	P51636	Caveolin-2 OS=Homo sapiens OX=9606 GN=CAV2 PE=1 SV=2	0	FALSE	9.811	25	2	2	2	1	162	18.3	5.27	4.01	2	cell organization and biogenesis;regulation of biological process;response to stimulus;transport	cytoplasm;Golgi;membrane;nucleus	protein binding;structural molecule activity	Pf01146	858	ENSG00000105971.14	CAV2	7	Endocytosis; Focal adhesion; Proteoglycans in cancer; Bacterial invasion of epithelial cells	EGF/EGFR Signaling Pathway; Integrin-mediated Cell Adhesion; Focal Adhesion	0	0.867	1.512	0.363	0.224	0.249	0.88684	0.607745	0.00971233	5.57661e-08	0.00117323	90.21	91.07	23.28	2.98	6.67	111.1	126.3	145	17.6	75.82	81.29
TRUE	High	Master Protein	P20936	Ras GTPase-activating protein 1 OS=Homo sapiens OX=9606 GN=RASA1 PE=1 SV=1	0	FALSE	6.867	2	2	3	2	1	1047	116.3	6.54	6.95	2	cell differentiation;cell organization and biogenesis;metabolic process;regulation of biological process;response to stimulus	cytoplasm;cytosol;membrane	catalytic activity;enzyme regulator activity;protein binding	Pf00017, Pf00018, Pf00168, Pf00169, Pf00616, Pf14604	5921	ENSG00000145715.14	RASA1	5	MAPK signaling pathway; Ras signaling pathway; Axon guidance	PDGF Pathway; EPO Receptor Signaling; MAPK Signaling Pathway; Rac1/Pak1/p38/MMP-2 pathway; T-Cell Receptor and Co-stimulatory Signaling; EGF/EGFR Signaling Pathway; Signaling of Hepatocyte Growth Factor Receptor	0	1.589	0.866	0.362	0.832	0.682	0.467831	0.999876	0.0610182	0.808224	0.79596	107.76	20.85	27.84	41.39	30.5	155.7	40.7	98.2	105.5	33.83
TRUE	High	Master Protein	O43294	Transforming growth factor beta-1-induced transcript 1 protein OS=Homo sapiens OX=9606 GN=TGFB1I1 PE=1 SV=2	0	FALSE	20.015	9	2	12	2	1	461	49.8	7.03	35.78	2	cell differentiation;metabolic process;regulation of biological process;response to stimulus	cytoplasm;cytoskeleton;nucleus	metal ion binding;protein binding	Pf00412	7041	ENSG00000140682.18	TGFB1I1	16		Serotonin Transporter Activity; TGF-beta Signaling Pathway; Monoamine Transport; Androgen receptor signaling pathway	0	0.592	1.555	0.357	0.186	0.182	0.393362	0.544692	0.0348886	2.26934e-07	0.000365562	8.48	77.97	7.5	2.69	1.22	92.8	46	248	13.2	44.35	69.04
TRUE	High	Master Protein	Q8WVK2	U4/U6.U5 small nuclear ribonucleoprotein 27 kDa protein OS=Homo sapiens OX=9606 GN=SNRNP27 PE=1 SV=1	0	FALSE	9.057	17	2	3	2	1	155	18.8	11.62	6.53	2	metabolic process	nucleus	protein binding	Pf08648	11017	ENSG00000124380.10	SNRNP27	2	Spliceosome		0	1.661	1.281	0.348	0.357	0.597	0.0186859	0.826025	0.00288046	0.000389474	0.422283	43.6	23.43	11.59	16.81	36.01	98.6	129.8	126.4	45.1	40.09	43.65
TRUE	High	Master Protein	Q13009	T-lymphoma invasion and metastasis-inducing protein 1 OS=Homo sapiens OX=9606 GN=TIAM1 PE=1 SV=2	0	FALSE	15.059	3	3	5	3	1	1591	177.4	6.61	14.15	3	cell death;cell growth;cell organization and biogenesis;cellular component movement;regulation of biological process;response to stimulus	cytoplasm;cytosol;membrane;nucleus	protein binding;signal transducer activity	Pf00169, Pf00595, Pf00621, Pf02196, Pf13180, Pf15410	7074	ENSG00000156299.13	TIAM1	21	Rap1 signaling pathway; Proteoglycans in cancer; Regulation of actin cytoskeleton; Ras signaling pathway; Chemokine signaling pathway; cAMP signaling pathway	Regulation of Microtubule Cytoskeleton; Chemokine signaling pathway; Brain-Derived Neurotrophic Factor (BDNF) signaling pathway	0	1.201	0.521	0.338	1.111	0.378	0.814119	0.375687	0.0106871	0.987612	0.0680578	60.55	23.83	3.79	77	5.1	143.5	164.8	47.9	43.9	24.57	38.81
TRUE	High	Master Protein	P00395	Cytochrome c oxidase subunit 1 OS=Homo sapiens OX=9606 GN=MT-CO1 PE=1 SV=1	0	FALSE	27.954	8	2	16	2	1	513	57	6.7	78.34	2	metabolic process;response to stimulus;transport	membrane;mitochondrion	catalytic activity;metal ion binding;protein binding;transporter activity	Pf00115	4512	ENSG00000198804.2	COX1	MT	Huntington's disease; Parkinson's disease; Alzheimer's disease; Oxidative phosphorylation; Non-alcoholic fatty liver disease (NAFLD); Metabolic pathways; Cardiac muscle contraction	Quercetin and Nf-kB/ AP-1 Induced Cell Apoptosis; Electron Transport Chain; Effects of Nitric Oxide	0	1.549	1.102	0.332	0.807	0.988	3.42169e-07	0.856825	4.4244e-12	0.157851	0.994878	60.36	40.24	1.99	22.62	55.01	79.9	153.8	103.7	62.7	85.41	0.64
TRUE	High	Master Protein	O60476	Mannosyl-oligosaccharide 1,2-alpha-mannosidase IB OS=Homo sapiens OX=9606 GN=MAN1A2 PE=1 SV=1	0	FALSE	16.415	9	4	4	4	1	641	73	7.61	10.47	4	metabolic process	endoplasmic reticulum;Golgi;membrane	catalytic activity;metal ion binding	Pf01532	10905	ENSG00000198162.12	MAN1A2	1	N-Glycan biosynthesis; Protein processing in endoplasmic reticulum; Metabolic pathways		0	3.44	1.057	0.331	0.969	1.259	9.10844e-13	0.975783	0.000851974	0.927484	0.925118	58.56	19.17	4.97	87.23	20.22	77.9	123.4	109.6	89.1	10.78	55.29
TRUE	High	Master Protein	Q3KQV9	UDP-N-acetylhexosamine pyrophosphorylase-like protein 1 OS=Homo sapiens OX=9606 GN=UAP1L1 PE=1 SV=2	0	FALSE	21.791	7	3	13	2	1	507	57	6.32	43.09	3	metabolic process	cytosol	catalytic activity	Pf01704	91373	ENSG00000197355.10	UAP1L1	9	Amino sugar and nucleotide sugar metabolism; Metabolic pathways		0	1.658	1.102	0.324	0.3	1.284	0.121664	0.962137	0.00270325	1.75399e-05	0.937759	94.32	81.81	7.88	2.64	109.24	89.2	103.3	128.2	79.3	53.91	67.63
TRUE	High	Master Protein	Q9BT25	HAUS augmin-like complex subunit 8 OS=Homo sapiens OX=9606 GN=HAUS8 PE=1 SV=3	0	FALSE	11.654	13	2	3	2	1	410	44.8	7.06	11.52	2	cell division;cell organization and biogenesis;regulation of biological process	cytoplasm;cytoskeleton;cytosol	protein binding		93323	ENSG00000131351.14	HAUS8	19			0	1.171	0.952	0.319	0.535	0.512	0.853978	0.999876	0.00186935	0.143833	0.374113	102.43	45.77	8.1	16.67	5.07	103.9	156.3	104	35.8	34.54	43.55
TRUE	High	Master Protein	Q9NVU0	DNA-directed RNA polymerase III subunit RPC5 OS=Homo sapiens OX=9606 GN=POLR3E PE=1 SV=1	0.001	FALSE	6.399	5	2	5	2	1	708	79.8	6.47	7.9	2	defense response;metabolic process;regulation of biological process;response to stimulus	cytosol;nucleus	catalytic activity	Pf04801	55718; 101060521	ENSG00000058600.15; ENSG00000284282.1	POLR3E; LOC101060521	16; CHR_HG926_PATCH	Epstein-Barr virus infection; Purine metabolism; Cytosolic DNA-sensing pathway; RNA polymerase; Pyrimidine metabolism	Eukaryotic Transcription Initiation	0	1.161	1.254	0.315	0.389	0.44	0.929248	0.90376	0.0133504	0.0131947	0.255751	72.71	58.1	5.98	5.71	6.55	133.9	101.8	147.6	16.6	62.15	51.36
TRUE	High	Master Protein	Q8TEU7	Rap guanine nucleotide exchange factor 6 OS=Homo sapiens OX=9606 GN=RAPGEF6 PE=1 SV=2	0	FALSE	11.307	2	2	4	2	1	1601	179.3	6.4	12.24	2	cell organization and biogenesis;regulation of biological process;response to stimulus	cytoplasm;cytosol;membrane	protein binding	Pf00027, Pf00595, Pf00617, Pf00618, Pf00788, Pf13180	51735	ENSG00000158987.20	RAPGEF6	5	Rap1 signaling pathway		0	1.198	0.747	0.313	0.471	0.362	0.814302	0.895421	0.00173638	0.0591082	0.0336343	28.79	8.35	5.3	4.69	3.47	132.9	135.2	89.7	42.3	12.74	29.06
TRUE	High	Master Protein	P04264	Keratin, type II cytoskeletal 1 OS=Homo sapiens OX=9606 GN=KRT1 PE=1 SV=6	0	FALSE	91.781	32	17	147	13	1	644	66	8.12	376.04	17	cell death;defense response;metabolic process;regulation of biological process;response to stimulus;transport	cytoskeleton;cytosol;extracellular;membrane;nucleus	catalytic activity;motor activity;protein binding;receptor activity;structural molecule activity	Pf00038, Pf01576, Pf05103, Pf05957, Pf12128, Pf13166, Pf13514	3848	ENSG00000167768.4	KRT1	12		Corticotropin-releasing hormone signaling pathway	1	1.493	0.511	0.312	1.16	0.662	3.06901e-07	0.0561966	1.71519e-13	0.969922	0.125043	98.04	24.3	9.84	78.15	43.15	163.7	165.9	26.8	43.6	120.71	68.78
TRUE	High	Master Protein	O95365	Zinc finger and BTB domain-containing protein 7A OS=Homo sapiens OX=9606 GN=ZBTB7A PE=1 SV=1	0	FALSE	14.258	9	3	4	3	1	584	61.4	5.19	10.06	3	cell differentiation;development;metabolic process;regulation of biological process	nucleus	DNA binding;metal ion binding;protein binding	Pf00096, Pf00651, Pf13465, Pf13894	51341	ENSG00000178951.8	ZBTB7A	19			0	1.279	0.805	0.305	0.693	0.246	0.673544	0.952472	0.0029001	0.545018	0.00146776	54.8	53.65	5.97	36.6	0.15	149.1	158.3	58.3	34.4	61.03	67.67
TRUE	High	Master Protein	Q07973	1,25-dihydroxyvitamin D(3) 24-hydroxylase, mitochondrial OS=Homo sapiens OX=9606 GN=CYP24A1 PE=1 SV=2	0	FALSE	20.445	13	5	8	5	1	514	58.8	8.75	18.37	5	cell communication;cell differentiation;metabolic process;regulation of biological process;response to stimulus	membrane;mitochondrion;nucleus	catalytic activity;metal ion binding	Pf00067	1591	ENSG00000019186.9	CYP24A1	20	MicroRNAs in cancer; Steroid biosynthesis; Metabolic pathways	Metapathway biotransformation; Vitamin D Metabolism; Oxidation by Cytochrome P450; Nuclear Receptors in Lipid Metabolism and Toxicity	0	1.373	0.323	0.275	0.835	0.229	0.312544	0.0151599	0.0055833	0.82979	1.2679e-05	30.88	2.58	6.5	42.05	3.63	265.3	75.7	26.3	32.7	5.97	103.32
TRUE	High	Master Protein	P15104	Glutamine synthetase OS=Homo sapiens OX=9606 GN=GLUL PE=1 SV=4	0	FALSE	77.623	39	12	58	12	1	373	42	6.89	190.16	12	cell communication;cell organization and biogenesis;cell proliferation;metabolic process;regulation of biological process;response to stimulus;transport	cytoplasm;cytosol;endoplasmic reticulum;mitochondrion;nucleus	catalytic activity;metal ion binding;nucleotide binding;protein binding	Pf00120, Pf03951	2752	ENSG00000135821.17	GLUL	1	Arginine biosynthesis; Glutamatergic synapse; Alanine, aspartate and glutamate metabolism; Biosynthesis of amino acids; GABAergic synapse; Nitrogen metabolism; Metabolic pathways; Glyoxylate and dicarboxylate metabolism	TNF alpha Signaling Pathway; Amino Acid metabolism	0	1.453	0.363	0.275	1.337	0.438	1.4544e-06	8.81662e-05	3.26911e-16	0.696817	1.01335e-05	62.21	11.2	3.54	46.82	14.31	124.4	195	32.3	48.3	65.53	6.56
TRUE	High	Master Protein	P62306	Small nuclear ribonucleoprotein F OS=Homo sapiens OX=9606 GN=SNRPF PE=1 SV=1	0	FALSE	10.968	24	2	17	2	1	86	9.7	4.67	44.48	2	cell organization and biogenesis;metabolic process;transport	cytoplasm;cytosol;nucleus;spliceosomal complex	protein binding;RNA binding	Pf01423	6636	ENSG00000139343.10	SNRPF	12	Spliceosome	mRNA Processing	0	1.043	0.578	0.271	0.47	0.283	0.937707	0.332454	5.65892e-08	0.00184707	1.51469e-06	47.61	22.67	7.28	21.38	7.66	128.4	140.7	70	60.8	14.9	39.67
TRUE	High	Master Protein	Q9Y2Z2	Protein MTO1 homolog, mitochondrial OS=Homo sapiens OX=9606 GN=MTO1 PE=1 SV=2	0	FALSE	10.911	9	3	4	3	1	717	79.9	8.31	6.07	3	cell organization and biogenesis;metabolic process	mitochondrion	catalytic activity;nucleotide binding;RNA binding	Pf01134, Pf13932	25821	ENSG00000135297.15	MTO1	6			0	0.882	0.783	0.267	0.303	0.237	0.902551	0.945294	0.000354226	0.000463993	0.00102322	10.76	26.53	4.16	4.51	3.59	137.8	121.6	107.9	32.7	4.89	12.73
TRUE	High	Master Protein	P0CG39	POTE ankyrin domain family member J OS=Homo sapiens OX=9606 GN=POTEJ PE=3 SV=1	0	FALSE	54.197	7	6	166	2	1	1038	117.3	5.97	509.54	6			protein binding	Pf00022, Pf00023, Pf12796, Pf13606, Pf13637, Pf13857, Pf14915	653781	ENSG00000222038.3	POTEJ	2			0	1.066	1.279	0.261	0.217	0.278	0.929413	0.82333	1.29153e-05	4.78219e-12	6.43139e-05	0	0	0	0	0	110.4	117.7	141.2	30.7
TRUE	High	Master Protein	P08243	Asparagine synthetase [glutamine-hydrolyzing] OS=Homo sapiens OX=9606 GN=ASNS PE=1 SV=4	0	FALSE	221.236	65	30	222	30	1	561	64.3	6.86	680.06	30	cell communication;metabolic process;regulation of biological process;response to stimulus	cytosol	catalytic activity;nucleotide binding;protein binding	Pf00310, Pf00733, Pf12481, Pf13522, Pf13537	440	ENSG00000070669.16	ASNS	7	Alanine, aspartate and glutamate metabolism; Metabolic pathways	Photodynamic therapy-induced unfolded protein response; Amino Acid metabolism	0	1.068	0.192	0.252	1.269	0.272	0.279281	3.81902e-16	3.26911e-16	0.637528	3.35161e-16	64.45	2.56	4.04	62.5	6.57	137.1	202.6	23	37.3	35.33	47.15
TRUE	High	Master Protein	P48436	Transcription factor SOX-9 OS=Homo sapiens OX=9606 GN=SOX9 PE=1 SV=1	0	FALSE	20.726	14	5	7	5	1	509	56.1	6.81	12.97	5	cell communication;cell differentiation;cell growth;cell organization and biogenesis;cell proliferation;metabolic process;regulation of biological process;response to stimulus	nucleus	catalytic activity;DNA binding;protein binding;RNA binding	Pf00505, Pf09011, Pf12444	6662	ENSG00000125398.5	SOX9	17	cAMP signaling pathway	Spinal Cord Injury; Endochondral Ossification; Neural Crest Differentiation	0	0.796	0.315	0.25	0.484	0.227	0.616918	0.016972	1.7854e-05	0.0791099	3.88663e-06	18.46	8.57	2.1	26.52	3.06	184.4	138.6	45.6	31.4	21.23	8.17
TRUE	High	Master Protein	Q9NZI7	Upstream-binding protein 1 OS=Homo sapiens OX=9606 GN=UBP1 PE=1 SV=1	0	FALSE	17.404	9	3	10	2	1	540	60.5	6.35	39.7	3	metabolic process;regulation of biological process	cytosol;nucleus	DNA binding	Pf04516	7342	ENSG00000153560.11	UBP1	3			0	2.004	1.775	0.239	0.312	0.553	0.082608	0.487024	0.00152366	0.000947916	0.553815	49.49	0	13.26	39.14	123.35	75	150.3	133.2	41.5		56.94
TRUE	High	Master Protein	Q6P6C2	RNA demethylase ALKBH5 OS=Homo sapiens OX=9606 GN=ALKBH5 PE=1 SV=2	0	FALSE	15.509	11	2	6	2	1	394	44.2	9.09	19.92	2	cell differentiation;metabolic process;response to stimulus;transport	cytosol;Golgi;nucleus	catalytic activity;metal ion binding;RNA binding	Pf13532	54890	ENSG00000091542.8	ALKBH5	17			0	1.536	1.268	0.209	0.354	0.407	0.0105068	0.796245	2.81387e-12	2.42015e-06	0.00806775	45.51	43.78	4.69	10.53	17.93	102.6	142.9	139.3	15.3	21.48	28.6
TRUE	High	Master Protein	Q9C004	Protein sprouty homolog 4 OS=Homo sapiens OX=9606 GN=SPRY4 PE=1 SV=2	0	FALSE	18.52	19	4	12	4	1	299	32.5	7.88	41.79	4	development;regulation of biological process	cytoplasm;membrane	protein binding	Pf05210	81848	ENSG00000187678.8	SPRY4	5			0	0.913	0.105	0.187	1.266	0.166	0.90617	3.81902e-16	3.26911e-16	0.952464	4.63824e-13	32.14	0.67	3	43.54	1.67	198.9	156.6	19.4	25.2	10.35	18.17
TRUE	High	Master Protein	Q9NYM9	BET1-like protein OS=Homo sapiens OX=9606 GN=BET1L PE=1 SV=1	0	FALSE	15.417	32	2	12	2	1	111	12.4	8.16	35.56	2	cell organization and biogenesis;regulation of biological process;transport	cytosol;endosome;Golgi;membrane	protein binding	Pf05739	51272	ENSG00000177951.17	BET1L	11	SNARE interactions in vesicular transport		0	1.37	0.885	0.124	0.243	0.199	0.513054	0.995352	4.01044e-09	5.79125e-06	0.000267565	49.3	54.19	1.47	5.76	3.15	110.5	177	90.5	22	45.03	35.14
TRUE	High	Master Protein	P03886	NADH-ubiquinone oxidoreductase chain 1 OS=Homo sapiens OX=9606 GN=MT-ND1 PE=1 SV=1	0	FALSE	15.396	9	3	8	3	1	318	35.6	6.55	29.47	3	cell organization and biogenesis;metabolic process;response to stimulus;transport	membrane;mitochondrion	catalytic activity;protein binding	Pf00146	4535	ENSG00000198888.2	ND1	MT	Parkinson's disease; Oxidative phosphorylation; Metabolic pathways	Oxidative phosphorylation; Electron Transport Chain	0	0.928	1.222	0.123	0.535	0.517	0.95141	0.833274	1.26934e-11	0.00277732	0.115283	108.45	49.81	0.81	16.64	11.62	108.2	76.9	164.4	50.5	61.51	55.85
TRUE	High	Master Protein	Q9P246	Stromal interaction molecule 2 OS=Homo sapiens OX=9606 GN=STIM2 PE=1 SV=2	0	FALSE	9.954	4	2	2	2	1	746	83.9	6.76	7.38	2	cellular homeostasis;regulation of biological process;transport	endoplasmic reticulum;membrane	metal ion binding;protein binding;transporter activity	Pf00536, Pf07647	57620	ENSG00000109689.15	STIM2	4	Calcium signaling pathway		0	1.168	0.706	0.108	0.371	0.522	0.891331	0.830816	8.77141e-10	0.00204546	0.430755	36.93	26.83	0.74	14.71	28.89	103.6	185.9	86.1	24.4	56.36	57.65
TRUE	High	Master Protein	Q9Y5L3	Ectonucleoside triphosphate diphosphohydrolase 2 OS=Homo sapiens OX=9606 GN=ENTPD2 PE=1 SV=1	0	FALSE	11.176	8	2	5	2	1	495	53.6	8.27	17.9	2	metabolic process;regulation of biological process;response to stimulus	endoplasmic reticulum;membrane	catalytic activity;nucleotide binding	Pf01150	954	ENSG00000054179.11	ENTPD2	9	Purine metabolism; Taste transduction		0	2.78	0.989	0.035	0.071	0.314	0.00130215	0.999876	3.26911e-16	3.05343e-16	0.036717	105.84	130.09	0.06	0.25	7.9	65	92.9	221.1	20.9	118.48	128.17
TRUE	High	Master Protein	Q9BW04	Specifically androgen-regulated gene protein OS=Homo sapiens OX=9606 GN=SARG PE=1 SV=2	0	FALSE	11.828	7	2	2	2	1	601	63.9	8.62	6.94	2		cytoplasm;cytosol;membrane	protein binding	Pf15385	79098	ENSG00000182795.12	C1orf116	1			0	100	100	0.01	0.01		4.12715e-16	3.81902e-16	3.26911e-16	3.05343e-16								108.8	291.2			56.59
TRUE	High	Master Protein	O43310	CBP80/20-dependent translation initiation factor OS=Homo sapiens OX=9606 GN=CTIF PE=1 SV=1	0	FALSE	9.587	5	2	2	2	1	598	67.5	6.54	5.88	2	metabolic process;regulation of biological process	cytoplasm;cytosol	protein binding;RNA binding	Pf02854	9811	ENSG00000282825.1; ENSG00000134030.13	CTIF	18; CHR_HG2213_PATCH			0	100	100	0.01	0.01		4.12715e-16	3.81902e-16	3.26911e-16	3.05343e-16								325.8	74.2			82.33
TRUE	High	Master Protein	O60921	Checkpoint protein HUS1 OS=Homo sapiens OX=9606 GN=HUS1 PE=1 SV=1	0	FALSE	7.18	12	2	2	2	1	280	31.7	6.84	5.11	2	metabolic process;regulation of biological process;response to stimulus	cytoplasm;cytosol;nucleus	protein binding	Pf04005	3364	ENSG00000136273.11	HUS1	7		ATR Signaling	0	4.215	2.782	0.01	0.01	0.01	7.40377e-06	0.0638956	3.26911e-16	3.05343e-16	3.35161e-16	129.33	87.35				50	210.8	139.1			92.96
TRUE	High	Master Protein	Q14562	ATP-dependent RNA helicase DHX8 OS=Homo sapiens OX=9606 GN=DHX8 PE=1 SV=1	0	FALSE	9.849	3	3	9	2	1	1220	139.2	8.32	12.49	3	metabolic process	cytoplasm;nucleus;spliceosomal complex	catalytic activity;nucleotide binding;protein binding;RNA binding	Pf00271, Pf00575, Pf04408, Pf07717	1659	ENSG00000067596.10	DHX8	17	Spliceosome	mRNA Processing	0	100		0.01			4.12715e-16		3.26911e-16									400				65.48
TRUE	High	Master Protein	Q9NUL7	Probable ATP-dependent RNA helicase DDX28 OS=Homo sapiens OX=9606 GN=DDX28 PE=1 SV=2	0	FALSE	14.052	10	2	4	2	1	540	59.5	10.42	16.07	2	cell organization and biogenesis;metabolic process	cytosol;mitochondrion;nucleus;organelle lumen	catalytic activity;nucleotide binding;RNA binding	Pf00270, Pf00271	55794	ENSG00000182810.6	DDX28	16			0	0.928	0.683	0.01	0.01	0.01	0.955824	0.826025	3.26911e-16	3.05343e-16	3.35161e-16	1.68	3.6				123.2	114.3	162.5		1.86
TRUE	High	Master Protein	Q9NUL3	Double-stranded RNA-binding protein Staufen homolog 2 OS=Homo sapiens OX=9606 GN=STAU2 PE=1 SV=2	0	FALSE	6.823	6	3	6	2	1	570	62.6	9.61	5.36	3											0	100		0.01			4.12715e-16		3.26911e-16									400
TRUE	High	Master Protein	O95602	DNA-directed RNA polymerase I subunit RPA1 OS=Homo sapiens OX=9606 GN=POLR1A PE=1 SV=2	0.002	FALSE	5.073	3	2	2	2	1	1720	194.7	7.03	0	2	metabolic process;regulation of biological process	nucleus	catalytic activity;DNA binding;metal ion binding;protein binding	Pf00623, Pf04983, Pf04997, Pf04998, Pf05000	25885	ENSG00000068654.15	POLR1A	2	Purine metabolism; RNA polymerase; Metabolic pathways; Pyrimidine metabolism	Eukaryotic Transcription Initiation	0	0.348	0.803	0.01	0.01	0.01	1.52428e-06	0.961568	3.26911e-16	3.05343e-16	3.35161e-16	8.96	55.87				186	64.8	149.3		69.99	18.87
TRUE	High	Master Protein	Q6NW29	RWD domain-containing protein 4 OS=Homo sapiens OX=9606 GN=RWDD4 PE=1 SV=3	0	FALSE	8.231	10	2	4	2	1	188	21.2	5.31	6.13	2			protein binding	Pf05773	201965	ENSG00000182552.14	RWDD4	4			0	0.85	1.134	0.01	0.01	0.01	0.876913	0.957194	3.26911e-16	3.05343e-16	3.35161e-16	40.39	42.11				138.5	104.3	157.1		40.25	28.5
TRUE	High	Master Protein	Q96LB3	Intraflagellar transport protein 74 homolog OS=Homo sapiens OX=9606 GN=IFT74 PE=1 SV=1	0	FALSE	11.72	8	3	4	3	1	600	69.2	6	3.81	3	cell organization and biogenesis;cellular component movement;regulation of biological process;response to stimulus;transport	nucleus	protein binding	Pf05622, Pf11262, Pf13514	80173	ENSG00000096872.15	IFT74	9			0	0.826	0.973	0.01	0.01	0.01	0.931016	0.987862	3.26911e-16	3.05343e-16	3.35161e-16	0	0				142.9	118	139.1
TRUE	High	Master Protein	Q8TDH9	Biogenesis of lysosome-related organelles complex 1 subunit 5 OS=Homo sapiens OX=9606 GN=BLOC1S5 PE=1 SV=1	0.001	FALSE	6.395	12	2	2	2	1	187	21.6	7.59	4.1	2	cell organization and biogenesis;cellular component movement;regulation of biological process;transport		protein binding	Pf14942	63915	ENSG00000188428.19	BLOC1S5	6			0	1.047	10.751	0.01	0.01	0.01	0.981907	3.81902e-16	3.26911e-16	3.05343e-16	3.35161e-16	26.76	33.07				30	31.4	338.6		27.94	30.45
TRUE	High	Master Protein	Q8WUB8	PHD finger protein 10 OS=Homo sapiens OX=9606 GN=PHF10 PE=1 SV=3	0	FALSE	7.955	6	2	3	2	1	498	56	6.62	2.46	2	metabolic process;regulation of biological process	nucleus	metal ion binding;protein binding	Pf00628, Pf13831	55274	ENSG00000130024.14	PHF10	6			0	100	100	0.01	0.01		4.12715e-16	3.81902e-16	3.26911e-16	3.05343e-16								227.3	172.7
TRUE	High	Master Protein	Q9NZJ4	Sacsin OS=Homo sapiens OX=9606 GN=SACS PE=1 SV=2	0	FALSE	12.032	1	2	2	2	1	4579	520.8	7.05	5	2	metabolic process;regulation of biological process	cytoplasm;mitochondrion;nucleus	protein binding	Pf00240, Pf05168	26278	ENSG00000151835.14	SACS	13			0	1.071	0.01	0.01		0.01	0.972197	3.81902e-16	3.26911e-16		3.35161e-16	28.3					187.9	212.1			16.47	25.11
TRUE	High	Master Protein	Q8WWV3	Reticulon-4-interacting protein 1, mitochondrial OS=Homo sapiens OX=9606 GN=RTN4IP1 PE=1 SV=2	0.005	FALSE	3.749	8	2	2	2	1	396	43.6	9.11	0	2	metabolic process;regulation of biological process	membrane;mitochondrion	catalytic activity;metal ion binding	Pf00107, Pf08240, Pf13602	84816	ENSG00000130347.12	RTN4IP1	6			0	1.364	0.01	0.01		0.01	0.724842	3.81902e-16	3.26911e-16		3.35161e-16	61.78					210.3	189.7			60.62	33.88
TRUE	High	Master Protein	A0AVF1	Intraflagellar transport protein 56 OS=Homo sapiens OX=9606 GN=TTC26 PE=2 SV=1	0	FALSE	9.43	9	3	3	3	1	554	64.1	6.93	3.63	3	cell organization and biogenesis;cellular component movement;regulation of biological process;response to stimulus;transport		protein binding	Pf12895, Pf13414, Pf14559	79989	ENSG00000105948.13	TTC26	7			0	1.556	0.01	0.01		0.01	0.521698	3.81902e-16	3.26911e-16		3.35161e-16	92.68					135.5	264.5				95.22
TRUE	High	Master Protein	Q7L775	EPM2A-interacting protein 1 OS=Homo sapiens OX=9606 GN=EPM2AIP1 PE=1 SV=1	0.002	FALSE	4.682	5	2	3	2	1	607	70.3	6.11	1.83	2	regulation of biological process;response to stimulus	cytoplasm;endoplasmic reticulum;nucleus	DNA binding;protein binding		9852	ENSG00000178567.7	EPM2AIP1	3			0	1.611	0.01	0.01		0.01	0.450737	3.81902e-16	3.26911e-16		3.35161e-16	22.27					153.2	246.8			4.92	21.74
TRUE	High	Master Protein	P22676	Calretinin OS=Homo sapiens OX=9606 GN=CALB2 PE=2 SV=2	0	FALSE	12.925	11	2	3	2	1	271	31.5	5.15	9.98	2	cellular homeostasis	cytoplasm;cytosol;nucleus	metal ion binding	Pf00036, Pf13405, Pf13499	794	ENSG00000282830.1; ENSG00000172137.18	CALB2	16; CHR_HSCHR16_4_CTG3_1			0	1.149	0.783	0.01	0.01	0.01	0.931016	0.974221	3.26911e-16	3.05343e-16	3.35161e-16	25.7	14.78				145.4	149.6	104.9		83.51	26.88
[truncated: 15 more columns]
