# Supplementary material for: Mutant KRAS-Associated Proteome Is Mainly Controlled by Exogenous Factors
Source: Cells. 2022 Jun 21;11(13):1988. doi: 10.3390/cells11131988 (PMC9265670; doi:10.3390/cells11131988)
Supplement: Supplementary file 1 [file cells-11-01988-s001.zip › Supplementary file S6_HCT116_siKRAS_ctrlCM_vs_sCTRL_ctrlCM.xlsx]

## Sheet: Folha1
Checked	Protein FDR Confidence: Combined	Master	Accession	Description	Exp. q-value: Combined	Contaminant	Sum PEP Score	Coverage [%]	# Peptides	# PSMs	# Unique Peptides	# Protein Groups	# AAs	MW [kDa]	calc. pI	Score Sequest HT: Sequest HT	# Peptides (by Search Engine): Sequest HT	Biological Process	Cellular Component	Molecular Function	Pfam IDs	Entrez Gene ID	Ensembl Gene ID	Gene Symbol	Chromosome	KEGG Pathways	WikiPathways	# Razor Peptides	Abundance Ratio: (2_HCT116_siCTRL_FibCM) / (1_HCT116_siCTRL_ctrlCM)	Abundance Ratio: (3_HCT116_siKRAS_ctrlCM) / (1_HCT116_siCTRL_ctrlCM)	Abundance Ratio: (4_HCT116_siKRAS_FibCM) / (2_HCT116_siCTRL_FibCM)	Abundance Ratio: (4_HCT116_siKRAS_FibCM) / (3_HCT116_siKRAS_ctrlCM)	Abundance Ratio: (4_HCT116_siKRAS_FibCM) / (1_HCT116_siCTRL_ctrlCM)	Abundance Ratio Adj. P-Value: (2_HCT116_siCTRL_FibCM) / (1_HCT116_siCTRL_ctrlCM)	Abundance Ratio Adj. P-Value: (3_HCT116_siKRAS_ctrlCM) / (1_HCT116_siCTRL_ctrlCM)	Abundance Ratio Adj. P-Value: (4_HCT116_siKRAS_FibCM) / (2_HCT116_siCTRL_FibCM)	Abundance Ratio Adj. P-Value: (4_HCT116_siKRAS_FibCM) / (3_HCT116_siKRAS_ctrlCM)	Abundance Ratio Adj. P-Value: (4_HCT116_siKRAS_FibCM) / (1_HCT116_siCTRL_ctrlCM)	Abundance Ratio Variability [%]: (2_HCT116_siCTRL_FibCM) / (1_HCT116_siCTRL_ctrlCM)	Abundance Ratio Variability [%]: (3_HCT116_siKRAS_ctrlCM) / (1_HCT116_siCTRL_ctrlCM)	Abundance Ratio Variability [%]: (4_HCT116_siKRAS_FibCM) / (2_HCT116_siCTRL_FibCM)	Abundance Ratio Variability [%]: (4_HCT116_siKRAS_FibCM) / (3_HCT116_siKRAS_ctrlCM)	Abundance Ratio Variability [%]: (4_HCT116_siKRAS_FibCM) / (1_HCT116_siCTRL_ctrlCM)	Abundances (Grouped): 1_HCT116_siCTRL_ctrlCM	Abundances (Grouped): 2_HCT116_siCTRL_FibCM	Abundances (Grouped): 3_HCT116_siKRAS_ctrlCM	Abundances (Grouped): 4_HCT116_siKRAS_FibCM	Abundances (Grouped) CV [%]: 1_HCT116_siCTRL_ctrlCM	Abundances (Grouped) CV [%]: 2_HCT116_siCTRL_FibCM
TRUE	High	Master Protein	Q9BW04	Specifically androgen-regulated gene protein OS=Homo sapiens OX=9606 GN=SARG PE=1 SV=2	0	FALSE	11.828	7	2	2	2	1	601	63.9	8.62	6.94	2		cytoplasm;cytosol;membrane	protein binding	Pf15385	79098	ENSG00000182795.12	C1orf116	1			0	100	100	0.01	0.01		4.12715e-16	3.81902e-16	3.26911e-16	3.05343e-16								108.8	291.2			56.59
TRUE	High	Master Protein	O43310	CBP80/20-dependent translation initiation factor OS=Homo sapiens OX=9606 GN=CTIF PE=1 SV=1	0	FALSE	9.587	5	2	2	2	1	598	67.5	6.54	5.88	2	metabolic process;regulation of biological process	cytoplasm;cytosol	protein binding;RNA binding	Pf02854	9811	ENSG00000282825.1; ENSG00000134030.13	CTIF	18; CHR_HG2213_PATCH			0	100	100	0.01	0.01		4.12715e-16	3.81902e-16	3.26911e-16	3.05343e-16								325.8	74.2			82.33
TRUE	High	Master Protein	Q70E73	Ras-associated and pleckstrin homology domains-containing protein 1 OS=Homo sapiens OX=9606 GN=RAPH1 PE=1 SV=3	0.001	FALSE	5.319	3	2	3	2	1	1250	135.2	8.85	2.44	2	cell growth;regulation of biological process;response to stimulus	cytoplasm;cytoskeleton;cytosol;membrane	protein binding	Pf00169, Pf00788	65059	ENSG00000173166.17	RAPH1	2			0	100	100	1.033	1.465	100	4.12715e-16	3.81902e-16	0.999922	0.885412	3.35161e-16			16.91	8.13			146.1	103	150.9		16.92
TRUE	High	Master Protein	O75911	Short-chain dehydrogenase/reductase 3 OS=Homo sapiens OX=9606 GN=DHRS3 PE=1 SV=2	0	FALSE	11.003	11	2	2	2	1	302	33.5	8.84	8.1	2	metabolic process;regulation of biological process	membrane	catalytic activity;nucleotide binding	Pf00106, Pf01370, Pf02719, Pf08659, Pf13561	9249	ENSG00000162496.8	DHRS3	1	Retinol metabolism; Metabolic pathways	Vitamin A and Carotenoid Metabolism	0	100	100	2.615	2.898	100	4.12715e-16	3.81902e-16	0.0198612	0.00532369	3.35161e-16			0	214.41			77.7	42.9	279.4
TRUE	High	Master Protein	Q7Z569	BRCA1-associated protein OS=Homo sapiens OX=9606 GN=BRAP PE=1 SV=2	0.001	FALSE	6.246	4	2	2	2	1	592	67.3	5.92	2.24	2	metabolic process;regulation of biological process;response to stimulus	cytoplasm;cytosol;membrane	catalytic activity;metal ion binding;nucleotide binding;protein binding	Pf00097, Pf02148, Pf02841, Pf07576, Pf12128, Pf12678, Pf12718, Pf12861, Pf13639, Pf13923, Pf14634	8315	ENSG00000089234.15	BRAP	12	Ras signaling pathway		0		100	100	2.26	100		3.81902e-16	3.26911e-16	0.17987	3.35161e-16				57.92				122.7	277.3
TRUE	High	Master Protein	P09758	Tumor-associated calcium signal transducer 2 OS=Homo sapiens OX=9606 GN=TACSTD2 PE=1 SV=3	0	FALSE	20.982	18	3	4	3	1	323	35.7	8.87	11.37	3	cell proliferation;regulation of biological process;response to stimulus	cytosol;membrane;nucleus	protein binding;receptor activity	Pf00086	4070	ENSG00000184292.6	TACSTD2	1			0	100	100	10.356	0.584	100	4.12715e-16	3.81902e-16	3.74916e-09	0.0787509	3.35161e-16			0	33.11			17	228.4	154.5
TRUE	High	Master Protein	Q8NDZ4	Divergent protein kinase domain 2A OS=Homo sapiens OX=9606 GN=DIPK2A PE=1 SV=1	0	FALSE	8.02	6	2	2	2	1	430	49.5	8.53	4.2	2	cell proliferation;regulation of biological process	extracellular;Golgi;membrane		Pf12260	205428	ENSG00000181744.8	C3orf58	3			0		100		0.01			3.81902e-16		3.05343e-16									400
TRUE	High	Master Protein	O15121	Sphingolipid delta(4)-desaturase DES1 OS=Homo sapiens OX=9606 GN=DEGS1 PE=1 SV=1	0	FALSE	9.401	10	2	3	2	1	323	37.8	7.46	9.81	2	metabolic process;transport	endoplasmic reticulum;membrane;mitochondrion	catalytic activity	Pf00487, Pf08557	8560	ENSG00000143753.12	DEGS1	1	Sphingolipid metabolism; Sphingolipid signaling pathway; Metabolic pathways		0		100	100	0.502	100		3.81902e-16	3.26911e-16	0.162384	3.35161e-16				25.2				266.3	133.7
TRUE	High	Master Protein	Q9NVH6	Trimethyllysine dioxygenase, mitochondrial OS=Homo sapiens OX=9606 GN=TMLHE PE=1 SV=1	0.002	FALSE	5.044	6	2	3	2	1	421	49.5	7.72	4.86	2	metabolic process;regulation of biological process	mitochondrion;organelle lumen	catalytic activity;metal ion binding	Pf02668	55217	ENSG00000185973.10	TMLHE	X	Lysine degradation		0	100	100	8.539	4.457	100	4.12715e-16	3.81902e-16	2.44947e-07	0.000164171	3.35161e-16			111.77	188.14			34.9	66.9	298.2		80.6
TRUE	High	Master Protein	Q9BVS5	tRNA (adenine(58)-N(1))-methyltransferase, mitochondrial OS=Homo sapiens OX=9606 GN=TRMT61B PE=1 SV=2	0	FALSE	6.862	9	2	2	2	1	477	52.9	6.62	2.48	2	cell organization and biogenesis;metabolic process	mitochondrion;organelle lumen	catalytic activity;protein binding	Pf08704	55006	ENSG00000171103.10	TRMT61B	2			0	100	100	1.979	3.325	100	4.12715e-16	3.81902e-16	0.417938	0.0690457	3.35161e-16			0	0			111.9	66.6	221.5
TRUE	High	Master Protein	Q8WUB8	PHD finger protein 10 OS=Homo sapiens OX=9606 GN=PHF10 PE=1 SV=3	0	FALSE	7.955	6	2	3	2	1	498	56	6.62	2.46	2	metabolic process;regulation of biological process	nucleus	metal ion binding;protein binding	Pf00628, Pf13831	55274	ENSG00000130024.14	PHF10	6			0	100	100	0.01	0.01		4.12715e-16	3.81902e-16	3.26911e-16	3.05343e-16								227.3	172.7
TRUE	High	Master Protein	Q14699	Raftlin OS=Homo sapiens OX=9606 GN=RFTN1 PE=1 SV=4	0	FALSE	8.128	9	2	2	2	1	578	63.1	5.67	0	2	cell organization and biogenesis;regulation of biological process;response to stimulus;transport	cytoplasm;endosome;membrane	RNA binding	Pf15250	23180	ENSG00000131378.13	RFTN1	3			0		100		0.01			3.81902e-16		3.05343e-16									400
TRUE	High	Master Protein	P11169	Solute carrier family 2, facilitated glucose transporter member 3 OS=Homo sapiens OX=9606 GN=SLC2A3 PE=1 SV=1	0	FALSE	14.073	10	4	16	3	1	496	53.9	7.2	24.27	4	metabolic process;transport	membrane	transporter activity	Pf00083, Pf07690, Pf13347	6515	ENSG00000059804.15	SLC2A3	12		Glycolysis and Gluconeogenesis; NRF2 pathway; Photodynamic therapy-induced HIF-1 survival signaling; Focal Adhesion-PI3K-Akt-mTOR-signaling pathway	0		100	100	0.501	100		3.81902e-16	3.26911e-16	0.0497051	3.35161e-16				9.62				274.2	125.8
TRUE	High	Master Protein	Q01995	Transgelin OS=Homo sapiens OX=9606 GN=TAGLN PE=1 SV=4	0	FALSE	11.897	16	3	3	3	1	201	22.6	8.84	7.88	3	cell differentiation	cytoplasm	protein binding	Pf00307, Pf00402	6876	ENSG00000149591.16	TAGLN	11			0	100	100	2.55	0.926	100	4.12715e-16	3.81902e-16	0.1206	0.904066	3.35161e-16			2.26	44.94			48.4	228.1	123.5
TRUE	High	Master Protein	O15321	Transmembrane 9 superfamily member 1 OS=Homo sapiens OX=9606 GN=TM9SF1 PE=2 SV=2	0	FALSE	8.262	6	2	2	2	1	606	68.8	7.17	6.6	2	metabolic process	membrane;vacuole		Pf02990	10548	ENSG00000100926.14	TM9SF1	14			0	100	100	16.575	14.43	100	4.12715e-16	3.81902e-16	7.18366e-14	3.05343e-16	3.35161e-16			134.79	134.98			21.4	24.5	354.1		23.39
TRUE	High	Master Protein	P02452	Collagen alpha-1(I) chain OS=Homo sapiens OX=9606 GN=COL1A1 PE=1 SV=5	0	FALSE	11.056	3	3	5	3	1	1464	138.9	5.8	12.68	3	cell communication;cell differentiation;cell organization and biogenesis;cellular component movement;coagulation;metabolic process;regulation of biological process;response to stimulus;transport	cytoplasm;endoplasmic reticulum;extracellular;Golgi;organelle lumen	metal ion binding;protein binding;structural molecule activity	Pf00093, Pf01391, Pf01410	1277		COL1A1	17	Amoebiasis; Protein digestion and absorption; AGE-RAGE signaling pathway in diabetic complications; Focal adhesion; ECM-receptor interaction; PI3K-Akt signaling pathway; Platelet activation	Focal Adhesion-PI3K-Akt-mTOR-signaling pathway; Inflammatory Response Pathway; Focal Adhesion; miR-509-3p alteration of YAP1/ECM axis; Senescence and Autophagy in Cancer; Osteoblast Signaling	0	100	100	1.388	3.659	100	4.12715e-16	3.81902e-16	0.863572	0.000253927	3.35161e-16			34.13	24.81			139.9	45.9	214.2		56.81
TRUE	High	Master Protein	Q15910	Histone-lysine N-methyltransferase EZH2 OS=Homo sapiens OX=9606 GN=EZH2 PE=1 SV=2	0	FALSE	8.35	4	2	6	2	1	746	85.3	7.02	10.18	2	cell organization and biogenesis;metabolic process;regulation of biological process;response to stimulus	cytoplasm;nucleus	catalytic activity;DNA binding;protein binding;RNA binding	Pf00856, Pf11616	2146	ENSG00000106462.10	EZH2	7	Lysine degradation; MicroRNAs in cancer	Mecp2 and Associated Rett Syndrome; Endoderm Differentiation; miRs in Muscle Cell Differentiation; Interactome of polycomb repressive complex 2 (PRC2); Histone Modifications	0		100	100	1.07	100		3.81902e-16	3.26911e-16	0.987612	3.35161e-16				9.85				193.3	206.7
TRUE	High	Master Protein	Q86WA8	Lon protease homolog 2, peroxisomal OS=Homo sapiens OX=9606 GN=LONP2 PE=1 SV=1	0	FALSE	7.079	4	2	2	2	1	852	94.6	7.3	3.15	2	cell organization and biogenesis;metabolic process;regulation of biological process;response to stimulus;transport	cytoplasm;membrane;nucleus;organelle lumen	catalytic activity;nucleotide binding;protein binding	Pf00004, Pf01202, Pf02190, Pf05362, Pf07726, Pf07728, Pf13191, Pf13541	83752	ENSG00000102910.13	LONP2	16			0		100	100	2.828	100		3.81902e-16	3.26911e-16	0.021751	3.35161e-16				140.96				104.5	295.5
TRUE	High	Master Protein	Q8TDH9	Biogenesis of lysosome-related organelles complex 1 subunit 5 OS=Homo sapiens OX=9606 GN=BLOC1S5 PE=1 SV=1	0.001	FALSE	6.395	12	2	2	2	1	187	21.6	7.59	4.1	2	cell organization and biogenesis;cellular component movement;regulation of biological process;transport		protein binding	Pf14942	63915	ENSG00000188428.19	BLOC1S5	6			0	1.047	10.751	0.01	0.01	0.01	0.981907	3.81902e-16	3.26911e-16	3.05343e-16	3.35161e-16	26.76	33.07				30	31.4	338.6		27.94	30.45
TRUE	High	Master Protein	O75943	Cell cycle checkpoint protein RAD17 OS=Homo sapiens OX=9606 GN=RAD17 PE=1 SV=2	0.001	FALSE	5.99	4	2	2	2	1	681	77	7.06	2.07	2	metabolic process;regulation of biological process;response to stimulus;transport	nucleus	catalytic activity;DNA binding;nucleotide binding;protein binding	Pf00004, Pf00005, Pf00437, Pf03215, Pf13173, Pf13191, Pf13207, Pf13238, Pf13245, Pf13401, Pf13521	5884	ENSG00000152942.18	RAD17	5		miRNA Regulation of DNA Damage Response; Gastric cancer network 2; DNA Damage Response	0	0.819	8.158	0.571	0.157	0.467	0.934285	2.88737e-06	0.481144	7.12335e-06	0.358527	51.42	24.39	37.24	8.97	24.74	31.5	70.9	257.1	40.5	127.84	115.8
TRUE	High	Master Protein	P43003	Excitatory amino acid transporter 1 OS=Homo sapiens OX=9606 GN=SLC1A3 PE=1 SV=1	0	FALSE	39.209	13	5	11	5	1	542	59.5	8.41	36.16	5	cell communication;cell organization and biogenesis;metabolic process;regulation of biological process;response to stimulus;transport	cell surface;membrane	metal ion binding;transporter activity	Pf00375	6507	ENSG00000079215.13	SLC1A3	5	Glutamatergic synapse	Sudden Infant Death Syndrome (SIDS) Susceptibility Pathways; Synaptic Vesicle Pathway	0	1.103	6.357	1.813	0.746	2.121	0.929413	3.81902e-16	0.106726	0.0388798	0.0481869	47.85	119.86	66.08	54.02	98.05	18.8	20.8	314	46.4	64.87	16.83
TRUE	High	Master Protein	Q9UGT4	Sushi domain-containing protein 2 OS=Homo sapiens OX=9606 GN=SUSD2 PE=1 SV=1	0	FALSE	179.103	40	17	87	17	1	822	90.2	6.28	322.14	17	regulation of biological process;response to stimulus;transport	membrane	protein binding;receptor activity	Pf00084, Pf00094, Pf01033, Pf03782	56241	ENSG00000099994.10	SUSD2	22			0	1.057	4.786	4.171	0.961	4.278	0.845932	3.81902e-16	3.26911e-16	0.617532	3.35161e-16	45.47	76.91	76.21	86.75	62.96	22.7	24.5	185.3	167.5	8.88	37.54
TRUE	High	Master Protein	O14879	Interferon-induced protein with tetratricopeptide repeats 3 OS=Homo sapiens OX=9606 GN=IFIT3 PE=1 SV=1	0	FALSE	29.195	19	6	10	6	1	490	56	5.2	23.9	6	defense response;regulation of biological process;response to stimulus	cytoplasm;cytosol;mitochondrion	protein binding	Pf13414, Pf13424, Pf13432, Pf14559	3437	ENSG00000119917.13	IFIT3	10			0	0.731	4.646	6.698	0.924	4.873	0.785832	1.02914e-05	1.43685e-08	0.801811	3.36814e-06	38.2	49.83	57.66	43.4	57.73	22.1	13.4	185.7	178.7	22.28	45.16
TRUE	High	Master Protein	P09914	Interferon-induced protein with tetratricopeptide repeats 1 OS=Homo sapiens OX=9606 GN=IFIT1 PE=1 SV=2	0	FALSE	30.347	15	5	10	5	1	478	55.3	7.2	26.09	5	defense response;regulation of biological process;response to stimulus;transport	cytoplasm;cytosol	protein binding;RNA binding	Pf00515, Pf13176, Pf13424, Pf14559	3434	ENSG00000185745.9	IFIT1	10	Herpes simplex infection; Hepatitis C		0	1.277	4.065	4.229	1.285	4.088	0.847085	0.000116435	3.61463e-05	0.86499	9.61678e-05	62.47	117.2	69.48	56.93	69.48	20.7	13.9	168.6	196.8	59.96	64.31
TRUE	High	Master Protein	Q9HB90	Ras-related GTP-binding protein C OS=Homo sapiens OX=9606 GN=RRAGC PE=1 SV=1	0	FALSE	20.13	9	3	9	3	1	399	44.2	5.1	19.72	3	cell communication;cell death;cell growth;metabolic process;regulation of biological process;response to stimulus	cytoplasm;cytosol;nucleus;vacuole	catalytic activity;metal ion binding;nucleotide binding;protein binding	Pf00025, Pf04670	64121	ENSG00000116954.7	RRAGC	1	mTOR signaling pathway	Target Of Rapamycin (TOR) Signaling	0	3.814	4.024	0.953	0.903	3.278	2.14064e-06	0.00376323	0.988797	0.86499	0.0656706	15.69	43.1	35.57	44.32	43.19	25.9	124	117.5	132.5	23.58	17.83
TRUE	High	Master Protein	P50895	Basal cell adhesion molecule OS=Homo sapiens OX=9606 GN=BCAM PE=1 SV=2	0	FALSE	99.276	34	15	47	15	1	628	67.4	5.81	145.78	15	regulation of biological process;response to stimulus	cell surface;extracellular;membrane	protein binding;receptor activity;signal transducer activity	Pf00047, Pf07679, Pf08205, Pf13895, Pf13927	4059	ENSG00000187244.10	BCAM	19			0	1.311	3.989	2.62	1.069	3.769	0.0302825	9.48748e-13	1.74001e-07	0.964931	1.47258e-14	45.77	46.38	62.05	45.02	53.78	26.7	41.2	158.4	173.7	16.76	32.98
TRUE	High	Master Protein	Q9HA92	Radical S-adenosyl methionine domain-containing protein 1, mitochondrial OS=Homo sapiens OX=9606 GN=RSAD1 PE=2 SV=2	0	FALSE	8.167	6	2	2	2	1	442	48.7	7.78	5.2	2	metabolic process	cytoplasm;mitochondrion	catalytic activity;metal ion binding	Pf04055	55316	ENSG00000136444.9	RSAD1	17			0	1.69	3.697	1.214	0.555	1.89	0.347598	0.0104416	0.983918	0.0832409	0.638953	104.79	90.71	97.27	24.58	31.35	24.1	54.9	143.8	177.2	56.23	119.48
TRUE	High	Master Protein	O95833	Chloride intracellular channel protein 3 OS=Homo sapiens OX=9606 GN=CLIC3 PE=1 SV=2	0	FALSE	15.199	21	3	5	3	1	236	26.6	6.43	15.52	3	metabolic process;regulation of biological process;response to stimulus;transport	cytoplasm;membrane;nucleus	catalytic activity;protein binding;transporter activity	Pf13409, Pf13410, Pf13417	9022	ENSG00000169583.12	CLIC3	9			0	1.048	3.473	1.764	0.629	1.738	0.981907	0.000443933	0.506196	0.282868	0.668191	38.18	42.73	32.74	16.89	45.72	51.1	53.6	177.6	117.7	37.06	12.63
TRUE	High	Master Protein	P09497	Clathrin light chain B OS=Homo sapiens OX=9606 GN=CLTB PE=1 SV=1	0	FALSE	8.467	12	3	4	3	1	229	25.2	4.64	7.05	3	cell organization and biogenesis;transport	cytosol;membrane	protein binding;structural molecule activity	Pf01086	1212	ENSG00000175416.12	CLTB	5	Lysosome; Endocytosis; Huntington's disease; Endocrine and other factor-regulated calcium reabsorption; Bacterial invasion of epithelial cells; Synaptic vesicle cycle		0	0.913	3.446	0.802	0.095	0.896	0.947251	0.000202245	0.934319	3.05343e-16	0.955771	68.05	270.49	89.13	0.9	83.19	92.2	57.4	216.8	33.6	104.65	128.22
TRUE	High	Master Protein	Q9NUQ6	SPATS2-like protein OS=Homo sapiens OX=9606 GN=SPATS2L PE=1 SV=2	0	FALSE	69.294	27	10	31	10	1	558	61.7	9.64	90.85	10		cytoplasm;cytosol;nucleus	protein binding;RNA binding	Pf07139	26010	ENSG00000196141.13	SPATS2L	2			0	1.003	3.278	2.74	1.018	3.123	0.98899	2.92074e-07	1.39275e-06	0.905724	1.39614e-06	61.69	71.93	70.57	60.58	58.74	43.5	45.5	143.4	167.6	53.55	28.35
TRUE	High	Master Protein	Q8N5D0	WD and tetratricopeptide repeats protein 1 OS=Homo sapiens OX=9606 GN=WDTC1 PE=1 SV=2	0	FALSE	8.681	5	3	3	3	1	677	75.9	7.27	1.97	3	cell organization and biogenesis;cellular homeostasis;metabolic process;regulation of biological process;response to stimulus	cytosol;nucleus	enzyme regulator activity;protein binding	Pf00400, Pf00515, Pf12895, Pf13414, Pf13424, Pf13432, Pf14559	23038	ENSG00000142784.15	WDTC1	1			0	3.374	3.232	1.325	1.255	0.953	8.38999e-05	0.0168592	0.948365	0.95457	0.987913	66.45	92.45	16.84	35.62	0	44.9	89.8	238.1	27.2	103.99	89.55
TRUE	High	Master Protein	Q9BUA3	Spindlin interactor and repressor of chromatin-binding protein OS=Homo sapiens OX=9606 GN=SPINDOC PE=1 SV=3	0	FALSE	20.359	9	2	4	2	1	381	41	5.01	13.91	2					144097	ENSG00000168005.8	C11orf84	11			0	1.036	3.232	0.382	0.177	0.573	0.987145	0.0320715	0.066931	7.12667e-07	0.611121	5.4	86.63	11.09	2.41	17.26	85.8	88.9	191.3	33.9	38.95
TRUE	High	Master Protein	P15529	Membrane cofactor protein OS=Homo sapiens OX=9606 GN=CD46 PE=1 SV=3	0	FALSE	9.677	6	2	6	2	1	392	43.7	6.74	12.52	2	defense response;metabolic process;regulation of biological process;response to stimulus	cell surface;cytoplasm;Golgi;membrane	catalytic activity;enzyme regulator activity;protein binding;receptor activity	Pf00084	4179	ENSG00000117335.19	CD46	1	Complement and coagulation cascades; Measles	Complement and Coagulation Cascades	0	1.042	3.15	1.057	0.403	1.092	0.986042	0.00148241	0.999922	0.00256771	0.995752	50.11	90.31	45.07	16.16	49.2	66.8	73.5	173.8	85.8	49.59	63.32
TRUE	High	Master Protein	P10909	Clusterin OS=Homo sapiens OX=9606 GN=CLU PE=1 SV=1	0	FALSE	42.461	23	7	42	7	1	449	52.5	6.27	105.25	7	cell death;cell organization and biogenesis;cell proliferation;defense response;metabolic process;regulation of biological process;response to stimulus;transport	cell surface;cytoplasm;cytosol;endoplasmic reticulum;extracellular;Golgi;membrane;mitochondrion;nucleus;organelle lumen	catalytic activity;protein binding	Pf01093	1191	ENSG00000120885.21	CLU	8	Complement and coagulation cascades	Complement and Coagulation Cascades	0	1.027	3.147	3.596	1.109	3.411	0.931016	2.72219e-07	1.83916e-13	0.999173	5.31908e-12	58.38	50.23	50.08	36.85	37.39	40.4	43.7	132.8	183.1	29.65	27.15
TRUE	High	Master Protein	P47895	Aldehyde dehydrogenase family 1 member A3 OS=Homo sapiens OX=9606 GN=ALDH1A3 PE=1 SV=2	0	FALSE	228.274	71	27	227	24	1	512	56.1	7.25	696.28	27	cell organization and biogenesis;metabolic process;regulation of biological process;response to stimulus	cytoplasm;cytosol;membrane;nucleus	catalytic activity;nucleotide binding;protein binding	Pf00171	220	ENSG00000184254.16	ALDH1A3	15	Tyrosine metabolism; Histidine metabolism; beta-Alanine metabolism; Metabolism of xenobiotics by cytochrome P450; Drug metabolism - cytochrome P450; Chemical carcinogenesis; Glycolysis / Gluconeogenesis; Phenylalanine metabolism; Metabolic pathways	Vitamin A and Carotenoid Metabolism	3	0.995	3.054	2.654	1.041	2.859	0.940139	1.26423e-13	1.55975e-12	0.920331	1.7485e-13	43.74	53.35	66.36	50.93	65.84	49.5	52.8	162.3	135.4	3.53	13.19
TRUE	High	Master Protein	O95361	Tripartite motif-containing protein 16 OS=Homo sapiens OX=9606 GN=TRIM16 PE=1 SV=3	0	FALSE	20.669	10	3	5	3	1	564	63.9	5.49	14.04	3	cell organization and biogenesis;metabolic process;regulation of biological process;response to stimulus	cytoplasm;cytosol;membrane	DNA binding;metal ion binding;protein binding	Pf00622, Pf13765	10626	ENSG00000221926.11	TRIM16	17			0	0.784	3.01	3.949	1.341	3.098	0.920366	0.0349001	0.000325347	0.903456	0.0348451	0	238.05	387.6	74.75	387.6	10.1	7.9	96.3	285.7
TRUE	High	Master Protein	Q6ZVM7	TOM1-like protein 2 OS=Homo sapiens OX=9606 GN=TOM1L2 PE=1 SV=1	0	FALSE	37.699	20	5	12	5	1	507	55.5	4.79	36.68	5	regulation of biological process;response to stimulus;transport		protein binding	Pf00790, Pf01417, Pf03127	146691	ENSG00000175662.17	TOM1L2	17			0	1.022	2.992	1.353	0.482	1.845	0.987704	2.72048e-06	0.755417	6.34872e-09	0.284294	51.25	72.82	99	23.68	83.31	23.5	58.9	257.7	59.8	100.52	14.83
TRUE	High	Master Protein	Q8IZV5	Retinol dehydrogenase 10 OS=Homo sapiens OX=9606 GN=RDH10 PE=1 SV=1	0	FALSE	14.67	11	3	6	3	1	341	38.1	7.4	17.6	3	metabolic process	cytoplasm;endoplasmic reticulum;membrane;nucleus	catalytic activity	Pf00106	157506	ENSG00000121039.9	RDH10	8	Retinol metabolism; Metabolic pathways	Vitamin A and Carotenoid Metabolism	0	0.78	2.98	2.516	0.679	1.357	0.811946	0.00355095	0.0557673	0.432068	0.88909	10.72	56.45	55.13	27.17	102.65	69.7	30.5	152.9	146.9	16.09	73.64
TRUE	High	Master Protein	Q9NZ52	ADP-ribosylation factor-binding protein GGA3 OS=Homo sapiens OX=9606 GN=GGA3 PE=1 SV=1	0	FALSE	17.922	6	3	8	2	1	723	78.3	5.58	14.5	3	metabolic process;regulation of biological process;transport	endosome;Golgi;membrane	protein binding	Pf00790, Pf02883, Pf03127	23163	ENSG00000125447.16	GGA3	17	Lysosome		0	2.557	2.902	1.729	1.721	4.994	0.000406733	0.00789278	0.456728	0.443187	2.49267e-06	108.91	73.42	78.09	53.28	95.07	52	67.3	103.2	177.6	53.04	112.36
TRUE	High	Master Protein	Q9UM22	Mammalian ependymin-related protein 1 OS=Homo sapiens OX=9606 GN=EPDR1 PE=1 SV=2	0	FALSE	8.753	9	2	4	2	1	224	25.4	6.6	10.61	2		extracellular;vacuole	metal ion binding	Pf00811	54749	ENSG00000086289.11	EPDR1	7			0	2.382	2.868	1.435	0.876	3.833	0.0041599	0.0126788	0.811381	0.849598	0.0050931	68.67	41.75	37.94	14.91	59.09	40	98.9	112	149.1	80.53	7.47
TRUE	High	Master Protein	Q5VZF2	Muscleblind-like protein 2 OS=Homo sapiens OX=9606 GN=MBNL2 PE=1 SV=2	0	FALSE	28.311	24	5	27	2	1	373	40.5	8.38	85.67	5	metabolic process;regulation of biological process	cytoplasm;nucleus	metal ion binding;RNA binding		10150	ENSG00000139793.18	MBNL2	13			0	1.594	2.852	1.843	1.204	3.317	0.0410996	0.00701226	0.0131946	0.930559	6.09176e-06	62.27	81.02	19.14	31.72	66.41	33.2	86.4	112.2	168.1	107.96	64.15
TRUE	High	Master Protein	Q8N3E9	1-phosphatidylinositol 4,5-bisphosphate phosphodiesterase delta-3 OS=Homo sapiens OX=9606 GN=PLCD3 PE=1 SV=3	0	FALSE	72.595	23	11	36	11	1	789	89.2	6.98	111.36	11	metabolic process;regulation of biological process;response to stimulus	cytoplasm;cytosol;membrane	catalytic activity;metal ion binding;protein binding;signal transducer activity	Pf00168, Pf00169, Pf00387, Pf00388, Pf09279, Pf14788	113026	ENSG00000161714.11	PLCD3	17	Thyroid hormone signaling pathway; Phosphatidylinositol signaling system; AGE-RAGE signaling pathway in diabetic complications; Inositol phosphate metabolism; Metabolic pathways; Calcium signaling pathway	GPR40 PATHWAY	0	1.194	2.849	2.06	0.894	2.529	0.314298	2.72048e-06	0.000768374	0.516593	7.35884e-05	50.89	43.9	70.38	37.85	60.77	57.2	47.1	180.7	115	24.25	30.62
TRUE	High	Master Protein	P55268	Laminin subunit beta-2 OS=Homo sapiens OX=9606 GN=LAMB2 PE=1 SV=2	0	FALSE	9.529	2	3	3	3	1	1798	195.9	6.52	6.4	3	cell growth;cell organization and biogenesis;cellular component movement;metabolic process;regulation of biological process;transport	cytoplasm;extracellular;Golgi;organelle lumen	catalytic activity;motor activity;nucleotide binding;protein binding;structural molecule activity;transporter activity	Pf00053, Pf00055, Pf00430, Pf00769, Pf01576, Pf02050, Pf02841, Pf04111, Pf06008, Pf09831, Pf12128, Pf12795, Pf13514, Pf13851, Pf13868, Pf15070, Pf15558	3913	ENSG00000172037.13	LAMB2	3	Amoebiasis; Pathways in cancer; Toxoplasmosis; Focal adhesion; Small cell lung cancer; ECM-receptor interaction; PI3K-Akt signaling pathway	Focal Adhesion; Focal Adhesion-PI3K-Akt-mTOR-signaling pathway; Primary Focal Segmental Glomerulosclerosis FSGS; Inflammatory Response Pathway; Alpha 6 Beta 4 signaling pathway; miRNA targets in ECM and membrane receptors	0	1.295	2.832	2.483	1.063	3.104	0.769237	0.00716158	0.0163418	0.974239	0.00150803	17.05	16.96	24.52	14.2	10.09	47.5	54.7	142.1	155.7	43.23	17.42
TRUE	High	Master Protein	O60921	Checkpoint protein HUS1 OS=Homo sapiens OX=9606 GN=HUS1 PE=1 SV=1	0	FALSE	7.18	12	2	2	2	1	280	31.7	6.84	5.11	2	metabolic process;regulation of biological process;response to stimulus	cytoplasm;cytosol;nucleus	protein binding	Pf04005	3364	ENSG00000136273.11	HUS1	7		ATR Signaling	0	4.215	2.782	0.01	0.01	0.01	7.40377e-06	0.0638956	3.26911e-16	3.05343e-16	3.35161e-16	129.33	87.35				50	210.8	139.1			92.96
TRUE	High	Master Protein	P80404	4-aminobutyrate aminotransferase, mitochondrial OS=Homo sapiens OX=9606 GN=ABAT PE=1 SV=3	0	FALSE	41.619	23	8	13	8	1	500	56.4	7.96	38.3	8	metabolic process;regulation of biological process;response to stimulus	mitochondrion;organelle lumen	catalytic activity;metal ion binding;protein binding	Pf00202, Pf13481	18	ENSG00000183044.11	ABAT	16	Butanoate metabolism; Propanoate metabolism; beta-Alanine metabolism; Alanine, aspartate and glutamate metabolism; GABAergic synapse; Metabolic pathways; Valine, leucine and isoleucine degradation	Alanine and aspartate metabolism; Valproic acid pathway	0	0.827	2.736	1.91	0.83	1.731	0.544996	1.64401e-05	0.0201682	0.239889	0.0971038	44.03	50.07	94.02	31.79	102.64	121.9	54.9	139.2	83.9	45.36	66.39
TRUE	High	Master Protein	Q9NZN4	EH domain-containing protein 2 OS=Homo sapiens OX=9606 GN=EHD2 PE=1 SV=2	0	FALSE	123.677	54	18	103	16	1	543	61.1	6.46	344.45	18	cell organization and biogenesis;coagulation;regulation of biological process;transport	cytoplasm;cytoskeleton;cytosol;endosome;membrane;nucleus	catalytic activity;metal ion binding;nucleotide binding;protein binding	Pf00350, Pf01926, Pf12763	30846	ENSG00000024422.11	EHD2	19	Endocytosis	Insulin Signaling	0	0.925	2.732	2.05	0.795	2.126	0.929482	8.87177e-07	6.84229e-05	0.0297606	9.57831e-05	42.67	35.8	58.22	30.98	48	57.2	53.1	179	110.7	5.74	18.35
TRUE	High	Master Protein	P19012	Keratin, type I cytoskeletal 15 OS=Homo sapiens OX=9606 GN=KRT15 PE=1 SV=3	0	FALSE	52.843	17	11	141	2	1	456	49.2	4.77	270.77	11	cell death;cell organization and biogenesis	cytosol;nucleus	protein binding;structural molecule activity	Pf00038	3866	ENSG00000171346.15	KRT15	17			0	1.29	2.67	4.892	1.046	2.607	0.263703	6.77202e-06	3.26911e-16	0.95457	1.73245e-05	58.02	63.32	81.41	89.13	116.65	47.9	50.3	154.2	147.5	87.07	89.39
TRUE	High	Master Protein	Q68CZ2	Tensin-3 OS=Homo sapiens OX=9606 GN=TNS3 PE=1 SV=2	0	FALSE	31.229	8	6	11	6	1	1445	155.2	6.81	35.62	6	cellular component movement;regulation of biological process	cytosol	protein binding	Pf00017, Pf08416, Pf10409	64759	ENSG00000136205.16	TNS3	7			0	1.366	2.583	0.851	0.636	1.679	0.470638	0.0165261	0.91391	0.163926	0.5259	71.08	5.73	83.51	33.27	94.41	48.4	118.6	91.6	141.3	41.89	53.47
TRUE	High	Master Protein	Q9BUT1	3-hydroxybutyrate dehydrogenase type 2 OS=Homo sapiens OX=9606 GN=BDH2 PE=1 SV=2	0	FALSE	21.836	20	3	12	3	1	245	26.7	7.65	44.64	3	cell differentiation;metabolic process	cytoplasm;cytosol;mitochondrion	catalytic activity;nucleotide binding	Pf00106, Pf13561	56898	ENSG00000164039.14	BDH2	4	Butanoate metabolism; Synthesis and degradation of ketone bodies; Metabolic pathways		0	1.003	2.488	2.78	0.965	3.401	0.98899	0.000324034	2.09808e-05	0.762829	2.58316e-06	58.19	56	73.26	46.61	76.16	47.5	40.7	160.1	151.7	36	36.16
TRUE	High	Master Protein	Q8IXQ6	Protein mono-ADP-ribosyltransferase PARP9 OS=Homo sapiens OX=9606 GN=PARP9 PE=1 SV=2	0	FALSE	45.581	15	10	15	10	1	854	96.3	7.91	33.16	10	cellular component movement;metabolic process;regulation of biological process;response to stimulus	cytoplasm;cytosol;membrane;mitochondrion;nucleus	catalytic activity;enzyme regulator activity;nucleotide binding;protein binding	Pf01661	83666	ENSG00000138496.16	PARP9	3			0	1.022	2.48	3.296	1.525	3.477	0.990085	0.0192966	2.57184e-06	0.244596	1.61745e-05	36.82	70.39	50.1	55.25	51.42	33.8	41.7	150	174.4	39.73	52.15
TRUE	High	Master Protein	Q5K651	Sterile alpha motif domain-containing protein 9 OS=Homo sapiens OX=9606 GN=SAMD9 PE=1 SV=1	0	FALSE	34.076	10	8	17	8	1	1589	184.2	7.83	31.84	8	cell organization and biogenesis	cytoplasm;cytosol;endosome	nucleotide binding;protein binding	Pf00536, Pf04326, Pf07647	54809	ENSG00000205413.7	SAMD9	7			0	1.237	2.476	2.362	0.986	2.526	0.857613	0.0429774	0.0614486	0.903399	0.0246691	55.16	72.43	43.68	47.76	57.32	40.5	33.7	158.2	167.6	7.33	84.3
TRUE	High	Master Protein	O00469	Procollagen-lysine,2-oxoglutarate 5-dioxygenase 2 OS=Homo sapiens OX=9606 GN=PLOD2 PE=1 SV=2	0	FALSE	29.532	12	6	7	6	1	737	84.6	6.71	23.15	6	metabolic process;response to stimulus	endoplasmic reticulum;membrane	catalytic activity;metal ion binding	Pf03171	5352	ENSG00000152952.11	PLOD2	3	Lysine degradation		0	1.669	2.372	1.556	0.937	2.304	0.0418705	0.0498023	0.640417	0.894398	0.0855708	31.79	41.35	42.2	53.9	24.99	54.3	89.8	133	122.8	8.15	65.96
TRUE	High	Master Protein	Q08AF3	Schlafen family member 5 OS=Homo sapiens OX=9606 GN=SLFN5 PE=1 SV=1	0	FALSE	56.509	14	9	27	9	1	891	101	8.22	72.31	9	cell differentiation	nucleus	nucleotide binding	Pf04326, Pf09848, Pf13401, Pf13538	162394	ENSG00000166750.9	SLFN5	17			0	1.307	2.36	1.778	1.179	2.434	0.208116	0.00212017	0.0189159	0.950465	0.000532934	57.58	45.54	36.52	54.99	51.25	39.7	82.4	114.9	163	68.97	23.86
TRUE	High	Master Protein	Q6PCE3	Glucose 1,6-bisphosphate synthase OS=Homo sapiens OX=9606 GN=PGM2L1 PE=1 SV=3	0	FALSE	46.828	21	9	24	9	1	622	70.4	7.15	66.38	9	metabolic process	cytosol	catalytic activity;metal ion binding	Pf00408, Pf02878, Pf02879, Pf02880	283209	ENSG00000165434.7	PGM2L1	11	Starch and sucrose metabolism		0	0.93	2.342	2.556	1.016	2.437	0.949834	0.000438274	1.00272e-05	0.901471	0.00116826	28.58	26.6	43.67	40.3	40.28	33.6	64.1	155.4	147	65.14	40.84
TRUE	High	Master Protein	P05783	Keratin, type I cytoskeletal 18 OS=Homo sapiens OX=9606 GN=KRT18 PE=1 SV=2	0	FALSE	557.349	80	42	1167	40	1	430	48	5.45	4007.28	42	cell death;cell organization and biogenesis;regulation of biological process;response to stimulus;transport	cytoplasm;cytosol;nucleus	protein binding;RNA binding;structural molecule activity	Pf00038	3875	ENSG00000111057.10	KRT18	12	Pathogenic Escherichia coli infection	Pathogenic Escherichia coli infection	2	1	2.288	2.308	0.971	2.22	0.866434	5.19317e-08	4.07837e-09	0.673762	6.99559e-08	50.94	61.4	59.43	59.85	62.75	55.5	62	140.4	142.2	7.95	13.79
TRUE	High	Master Protein	Q13287	N-myc-interactor OS=Homo sapiens OX=9606 GN=NMI PE=1 SV=2	0	FALSE	27.402	29	7	12	7	1	307	35	5.34	18.2	7	defense response;metabolic process;regulation of biological process;response to stimulus	cytoplasm;cytosol	protein binding	Pf07292, Pf07334	9111	ENSG00000123609.10	NMI	2		IL-2 Signaling Pathway	0	1.127	2.281	3.702	1.37	3.514	0.931016	0.0449247	1.8641e-06	0.696935	3.28388e-05	70.98	55.91	57.59	51.47	67.2	38.1	34.9	129.4	197.6	33.7	51.06
TRUE	High	Master Protein	O00151	PDZ and LIM domain protein 1 OS=Homo sapiens OX=9606 GN=PDLIM1 PE=1 SV=4	0	FALSE	160.416	65	15	140	15	1	329	36	7.02	567.11	15	regulation of biological process;response to stimulus	cytoplasm;cytoskeleton	metal ion binding;protein binding	Pf00412, Pf00595, Pf13180	9124	ENSG00000107438.8	PDLIM1	10			0	1.118	2.243	2.39	1.264	3.076	0.253016	1.13715e-07	6.41528e-10	0.611243	3.35161e-16	38.47	71.27	62.48	68.54	50.24	55.1	65.7	125.5	153.7	15.28	10.47
TRUE	High	Master Protein	P07355	Annexin A2 OS=Homo sapiens OX=9606 GN=ANXA2 PE=1 SV=2	0	FALSE	366.855	79	34	790	34	1	339	38.6	7.75	2571.71	34	cell organization and biogenesis;metabolic process;regulation of biological process;response to stimulus;transport	cell surface;cytoplasm;cytosol;endoplasmic reticulum;endosome;extracellular;membrane;nucleus;organelle lumen	enzyme regulator activity;metal ion binding;protein binding;RNA binding	Pf00191	302	ENSG00000182718.16	ANXA2	15		Prostaglandin Synthesis and Regulation	0	0.721	2.241	2.744	0.96	2.084	2.50438e-06	1.15207e-07	1.97058e-13	0.621187	1.05397e-06	28.71	61.35	65.22	69.27	72.08	58.9	40.7	161.7	138.7	14.03	26.24
TRUE	High	Master Protein	P32519	ETS-related transcription factor Elf-1 OS=Homo sapiens OX=9606 GN=ELF1 PE=1 SV=2	0	FALSE	27.432	20	6	12	6	1	619	67.5	5.21	32.55	6	cell differentiation;metabolic process;regulation of biological process	nucleus	DNA binding;protein binding	Pf00178, Pf12310	1997	ENSG00000120690.15	ELF1	13			0	1.081	2.229	1.582	0.649	1.381	0.920121	0.026883	0.451187	0.0129136	0.79596	42.68	41.66	47.8	14.76	35.19	53.6	64.7	187.4	94.3	38.11	17.46
TRUE	High	Master Protein	P28065	Proteasome subunit beta type-9 OS=Homo sapiens OX=9606 GN=PSMB9 PE=1 SV=2	0	FALSE	28.011	31	5	16	5	1	219	23.3	5.03	44.18	5	metabolic process;regulation of biological process;response to stimulus;transport	cytoplasm;cytosol;nucleus;proteasome	catalytic activity;protein binding	Pf00227	5698	ENSG00000239836.7; ENSG00000243594.7; ENSG00000243067.7; ENSG00000240065.7; ENSG00000240118.7	PSMB9	6; CHR_HSCHR6_MHC_MANN_CTG1; CHR_HSCHR6_MHC_QBL_CTG1; CHR_HSCHR6_MHC_COX_CTG1; CHR_HSCHR6_MHC_DBB_CTG1	Proteasome	Proteasome Degradation; Type II interferon signaling (IFNG)	0	1.297	2.214	2.994	1.481	3.507	0.307077	0.00196613	1.10136e-07	0.242022	5.56475e-08	49.74	46.32	38.32	55.78	44.84	54.2	51.5	134	160.4	50.44	63.38
TRUE	High	Master Protein	Q07817	Bcl-2-like protein 1 OS=Homo sapiens OX=9606 GN=BCL2L1 PE=1 SV=1	0.001	FALSE	5.889	8	2	11	2	1	233	26	4.93	27.52	2	cell death;cell organization and biogenesis;cell proliferation;regulation of biological process;response to stimulus;transport	cytoplasm;cytoskeleton;cytosol;endoplasmic reticulum;membrane;mitochondrion;nucleus;organelle lumen	protein binding	Pf00452, Pf02180	598	ENSG00000171552.12	BCL2L1	20	NOD-like receptor signaling pathway; Pancreatic cancer; Chronic myeloid leukemia; Pathways in cancer; Apoptosis - multiple species; NF-kappa B signaling pathway; EGFR tyrosine kinase inhibitor resistance; HTLV-I infection; Toxoplasmosis; Apoptosis; Jak-STAT signaling pathway; Transcriptional misregulation in cancer; Small cell lung cancer; Amyotrophic lateral sclerosis (ALS); Ras signaling pathwa…	Apoptosis; IL-7 Signaling Pathway; LncRNA-mediated mechanisms of therapeutic resistance; Hepatitis C and Hepatocellular Carcinoma; Photodynamic therapy-induced HIF-1 survival signaling; Leptin signaling pathway; IL-3 Signaling Pathway; TNF alpha Signaling Pathway; Regulation of Apoptosis by Parathyroid Hormone-related Protein; Hematopoietic Stem Cell Gene Regulation by GABP alpha/beta Complex; VE…	0	1.097	2.194	1.318	0.587	1.512	0.894836	0.00634708	0.785282	0.000192846	0.521463	14.89	13.7	17.89	11.14	15.09	64.8	77.2	156.2	101.8	6.68	10.91
TRUE	High	Master Protein	P80217	Interferon-induced 35 kDa protein OS=Homo sapiens OX=9606 GN=IFI35 PE=1 SV=5	0	FALSE	30.14	22	5	22	5	1	286	31.5	6.09	49.97	5	regulation of biological process;response to stimulus	cytosol;nucleus	protein binding	Pf07292, Pf07334	3430	ENSG00000068079.7	IFI35	17			0	1.1	2.165	3.008	1.351	3.742	0.937707	0.0628528	3.13962e-06	0.68002	3.88663e-06	12.61	18.29	28.76	32.42	30.37	24	50.4	142.8	182.7	29.21	41.67
TRUE	High	Master Protein	Q8IZ52	Chondroitin sulfate synthase 2 OS=Homo sapiens OX=9606 GN=CHPF PE=1 SV=2	0	FALSE	29.217	10	6	16	6	1	775	85.4	6.93	43.94	6	metabolic process	cytoplasm;cytosol;Golgi;membrane;mitochondrion;organelle lumen	catalytic activity;metal ion binding;protein binding	Pf02434, Pf05679	79586	ENSG00000123989.13	CHPF	2	Metabolic pathways; Glycosaminoglycan biosynthesis - chondroitin sulfate / dermatan sulfate		0	0.972	2.134	1.724	0.935	1.822	0.990085	0.0368326	0.151528	0.707644	0.153561	27.34	20.49	21.89	33.61	37.76	68.9	65.5	134.9	130.7	17.73	6.98
TRUE	High	Master Protein	Q9Y570	Protein phosphatase methylesterase 1 OS=Homo sapiens OX=9606 GN=PPME1 PE=1 SV=3	0	FALSE	173.022	52	19	167	19	1	386	42.3	5.97	583.21	19	metabolic process;regulation of biological process		catalytic activity;enzyme regulator activity;protein binding	Pf00561, Pf12695, Pf12697	51400	ENSG00000214517.9	PPME1	11			0	1.073	2.12	1.997	0.952	2.024	0.461075	8.87177e-07	3.69793e-06	0.566339	3.3096e-06	43.86	42.36	60	55.66	61.61	65.8	62.7	135.5	136	9.61	18.54
TRUE	High	Master Protein	Q13641	Trophoblast glycoprotein OS=Homo sapiens OX=9606 GN=TPBG PE=1 SV=1	0	FALSE	34.388	14	4	16	4	1	420	46	6.83	62	4	regulation of biological process	cell surface;cytoplasm;endoplasmic reticulum;membrane	protein binding	Pf01462, Pf12799, Pf13855	7162	ENSG00000283085.1; ENSG00000146242.8	TPBG	6; CHR_HG2072_PATCH			0	1	2.096	1.944	1.025	2.139	0.991154	0.00154079	0.00476867	0.916321	0.0050931	56.56	29.95	67.45	54.71	71.78	69.2	65.5	143.8	121.5	29.7	9.6
TRUE	High	Master Protein	P04626	Receptor tyrosine-protein kinase erbB-2 OS=Homo sapiens OX=9606 GN=ERBB2 PE=1 SV=1	0	FALSE	34.97	11	7	13	6	1	1255	137.8	5.91	25.35	7	cell differentiation;cell organization and biogenesis;cell proliferation;cellular component movement;metabolic process;regulation of biological process;response to stimulus	cytoplasm;cytosol;membrane;nucleus	catalytic activity;nucleotide binding;protein binding;receptor activity;signal transducer activity	Pf00069, Pf00757, Pf01030, Pf07714, Pf14843	2064	ENSG00000141736.13	ERBB2	17	HIF-1 signaling pathway; Central carbon metabolism in cancer; Pancreatic cancer; MicroRNAs in cancer; Non-small cell lung cancer; Endometrial cancer; Breast cancer; ErbB signaling pathway; Pathways in cancer; Prostate cancer; EGFR tyrosine kinase inhibitor resistance; Focal adhesion; Proteoglycans in cancer; Adherens junction; Bladder cancer; Endocrine resistance; Calcium signaling pathway; Plati…	Pathways Affected in Adenoid Cystic Carcinoma; Signaling Pathways in Glioblastoma; Extracellular vesicle-mediated signaling in recipient cells; Prolactin Signaling Pathway; ErbB Signaling Pathway; Focal Adhesion; Association Between Physico-Chemical Features and Toxicity Associated Pathways; Rac1/Pak1/p38/MMP-2 pathway; DNA Damage Response (only ATM dependent); Bladder Cancer; Leptin signaling pa…	0	1.197	2.088	1.519	0.843	1.701	0.72302	0.0838075	0.474785	0.521683	0.420309	44.26	31.36	39.71	22.08	46.55	68.1	72.9	148.3	110.6	29.15	19.12
TRUE	High	Master Protein	Q8N5A5	Zinc finger CCCH-type with G patch domain-containing protein OS=Homo sapiens OX=9606 GN=ZGPAT PE=1 SV=3	0	FALSE	7.94	4	2	5	2	1	531	57.3	5.43	10.63	2	metabolic process;regulation of biological process	membrane;nucleus	DNA binding;metal ion binding;protein binding	Pf00642, Pf01585	84619	ENSG00000197114.11	ZGPAT	20			0	0.831	2.087	2.444	1.057	2.195	0.821173	0.114137	0.0282219	0.9666	0.0673501	9.24	46.02	23.64	36.89	22.54	63.8	55	144.3	136.9	19.56	7.23
TRUE	High	Master Protein	Q96LW7	Caspase recruitment domain-containing protein 19 OS=Homo sapiens OX=9606 GN=CARD19 PE=1 SV=1	0	FALSE	8.17	10	2	3	2	1	228	25.6	9.2	6.71	2	regulation of biological process	cytosol;endoplasmic reticulum;membrane;mitochondrion;nucleus	protein binding	Pf00619	84270	ENSG00000165233.17	C9orf89; CARD19	9			0	0.708	2.087	1.681	0.725	1.178	0.672714	0.105281	0.534814	0.451057	0.966327	38.21	118.35	113.94	36.24	76.96	45.6	54.2	181	119.1	63.05	71.31
TRUE	High	Master Protein	O15327	Type II inositol 3,4-bisphosphate 4-phosphatase OS=Homo sapiens OX=9606 GN=INPP4B PE=1 SV=4	0	FALSE	29.001	10	5	11	5	1	924	104.7	6.27	32.02	5	metabolic process;regulation of biological process;response to stimulus	cytoplasm;cytosol	catalytic activity;protein binding		8821	ENSG00000109452.12	INPP4B	4	Phosphatidylinositol signaling system; Inositol phosphate metabolism; Metabolic pathways	VEGFA-VEGFR2 Signaling Pathway	0	0.808	2.086	2.063	1.089	2.081	0.720327	0.0272108	0.00780948	0.982414	0.0289371	26.77	51.81	45.2	51.06	52.41	72.5	42.9	205.2	79.3	52.95	47.06
TRUE	High	Master Protein	Q92485	Acid sphingomyelinase-like phosphodiesterase 3b OS=Homo sapiens OX=9606 GN=SMPDL3B PE=1 SV=2	0	FALSE	13.594	11	3	3	3	1	455	50.8	5.64	9.25	3	defense response;metabolic process;regulation of biological process;response to stimulus	extracellular;membrane	catalytic activity;metal ion binding	Pf00149	27293	ENSG00000130768.14	SMPDL3B	1			0	0.728	2.08	1.826	0.77	1.317	0.39383	0.0382198	0.349612	0.214766	0.884411	44.65	38.08	73.66	39.77	40.52	90.2	49.9	197.1	62.7	32.1	69.99
TRUE	High	Master Protein	Q08380	Galectin-3-binding protein OS=Homo sapiens OX=9606 GN=LGALS3BP PE=1 SV=1	0	FALSE	140.927	31	14	180	14	1	585	65.3	5.27	616.65	14	defense response;regulation of biological process;response to stimulus;transport	extracellular;membrane;organelle lumen	protein binding;receptor activity	Pf00530, Pf07707	3959	ENSG00000108679.12	LGALS3BP	17			0	1.043	2.08	2.319	1.141	2.424	0.673701	1.72526e-06	3.24905e-09	0.95457	1.15395e-09	45.18	47.56	55.92	54.07	61.07	52.6	68.8	127.6	151	34.73	46.86
TRUE	High	Master Protein	P51688	N-sulphoglucosamine sulphohydrolase OS=Homo sapiens OX=9606 GN=SGSH PE=1 SV=1	0	FALSE	32.783	25	7	16	7	1	502	56.7	6.95	42.8	7	metabolic process	organelle lumen;vacuole	catalytic activity;metal ion binding	Pf00884, Pf01663	6448	ENSG00000181523.12	SGSH	17	Lysosome; Glycosaminoglycan degradation; Metabolic pathways		0	1.021	2.039	1.685	0.786	1.772	0.975443	0.00925722	0.0715563	0.0855012	0.0736056	73.18	62.15	64.88	44.52	61.04	81.9	90.9	132.5	94.8	35.79	36.37
TRUE	High	Master Protein	P0DP25	Calmodulin-3 OS=Homo sapiens OX=9606 GN=CALM3 PE=1 SV=1	0	FALSE	56.101	77	7	64	7	1	149	16.8	4.22	206.35	7	metabolic process;regulation of biological process;response to stimulus;transport	cytoplasm;cytoskeleton;cytosol;extracellular;membrane	catalytic activity;enzyme regulator activity;metal ion binding;protein binding;transporter activity	Pf00036, Pf08726, Pf12763, Pf13202, Pf13405, Pf13499, Pf13833, Pf14658	808; 805; 801	ENSG00000160014.16; ENSG00000143933.16; ENSG00000198668.10	CALM3; CALM2; CALM1	19; 2; 14	Dopaminergic synapse; Phototransduction; Vascular smooth muscle contraction; Insulin signaling pathway; Amphetamine addiction; cGMP-PKG signaling pathway; Renin secretion; Neurotrophin signaling pathway; Rap1 signaling pathway; Oxytocin signaling pathway; Olfactory transduction; Circadian entrainment; Long-term potentiation; Glioma; Phosphatidylinositol signaling system; Adrenergic signaling in c…	Melatonin metabolism and effects; Endothelin Pathways; Cardiac Hypertrophic Response; MicroRNAs in cardiomyocyte hypertrophy; G13 Signaling Pathway; G Protein Signaling Pathways; Glycogen Metabolism; T-Cell antigen Receptor (TCR) pathway during Staphylococcus aureus infection; Common Pathways Underlying Drug Addiction; Alzheimers Disease; T-Cell Receptor and Co-stimulatory Signaling; Physiologica…	0	0.753	0.499	0.785	1.247	0.629	0.0145181	0.0212246	0.417016	0.812558	0.0796989	42.52	24.27	39.63	84.8	32.84	145.6	115	63.2	76.2	49.92	28.18
TRUE	High	Master Protein	P09382	Galectin-1 OS=Homo sapiens OX=9606 GN=LGALS1 PE=1 SV=2	0	FALSE	59.821	54	7	111	7	1	135	14.7	5.5	329.92	7	cell death;cell differentiation;cellular homeostasis;metabolic process;regulation of biological process;response to stimulus	cell surface;cytoplasm;cytosol;extracellular;nucleus;organelle lumen	protein binding;RNA binding;signal transducer activity	Pf00337	3956	ENSG00000100097.11	LGALS1	22			0	0.916	0.495	0.551	1.192	0.537	0.887006	0.0293763	9.07228e-05	0.909997	0.00162893	40.95	13.54	13.39	47.97	15.93	143.3	128.1	66.6	62.1	18.38	21.73
TRUE	High	Master Protein	Q9UK76	Jupiter microtubule associated homolog 1 OS=Homo sapiens OX=9606 GN=JPT1 PE=1 SV=3	0	FALSE	73.672	75	7	52	7	1	154	16	5.6	216.61	7		cytoplasm;membrane;nucleus			51155	ENSG00000189159.15	HN1; JPT1	17			0	0.885	0.493	0.86	1.455	0.6	0.748511	0.0490367	0.790012	0.371512	0.0373218	78.49	26.18	77.02	104.15	37.29	297.7	53.3	17.1	31.9	72.06	123.05
TRUE	High	Master Protein	Q9UH99	SUN domain-containing protein 2 OS=Homo sapiens OX=9606 GN=SUN2 PE=1 SV=3	0	FALSE	81.252	32	12	46	12	1	717	80.3	6.73	139.03	12	cell organization and biogenesis;cellular component movement;regulation of biological process;transport	chromosome;endosome;membrane;nucleus	protein binding	Pf07738	25777	ENSG00000100242.15	SUN2	22			0	0.914	0.492	0.653	1.573	0.574	0.924064	0.0883645	0.0644583	0.168932	0.0546637	46.16	19.84	26.95	93.15	21.68	167.4	117.3	67.6	47.7	19.12	28.65
TRUE	High	Master Protein	P10599	Thioredoxin OS=Homo sapiens OX=9606 GN=TXN PE=1 SV=3	0	FALSE	66.739	70	6	113	6	1	105	11.7	4.92	349.86	6	cell communication;cell proliferation;cellular component movement;cellular homeostasis;metabolic process;regulation of biological process;response to stimulus;transport	cytoplasm;cytosol;extracellular;mitochondrion;nucleus	antioxidant activity;catalytic activity;protein binding;RNA binding	Pf00085, Pf00462, Pf13098, Pf13899, Pf13905	7295	ENSG00000136810.12	TXN	9	NOD-like receptor signaling pathway	VEGFA-VEGFR2 Signaling Pathway; Selenium Micronutrient Network; NRF2 pathway; TNF alpha Signaling Pathway	0	0.961	0.492	0.922	1.45	0.795	0.992692	0.00437498	0.860396	0.0521785	0.571568	52.53	22.95	63.35	95.84	53.08	156.9	99	54.6	89.4	30.78	39.93
TRUE	High	Master Protein	P11166	Solute carrier family 2, facilitated glucose transporter member 1 OS=Homo sapiens OX=9606 GN=SLC2A1 PE=1 SV=2	0	FALSE	33.126	14	7	53	6	1	492	54	8.72	133.37	7	cell communication;cell organization and biogenesis;metabolic process;regulation of biological process;response to stimulus;transport	cytoplasm;cytoskeleton;cytosol;membrane;nucleus	protein binding;transporter activity	Pf00083, Pf07690, Pf13347	6513	ENSG00000117394.20	SLC2A1	1	HIF-1 signaling pathway; Central carbon metabolism in cancer; Bile secretion; Pathways in cancer; Thyroid hormone signaling pathway; Insulin secretion; Renal cell carcinoma; Glucagon signaling pathway; HTLV-I infection; Insulin resistance; Adipocytokine signaling pathway	Cori Cycle; Photodynamic therapy-induced HIF-1 survival signaling; Insulin Signaling; NRF2 pathway; Angiopoietin Like Protein 8 Regulatory Pathway; Glycolysis and Gluconeogenesis; Focal Adhesion-PI3K-Akt-mTOR-signaling pathway	1	1.055	0.491	0.463	1.016	0.508	0.747369	0.0382107	2.26179e-06	0.913522	0.00230573	35.21	9.55	13.29	41.6	12.24	136	132.5	68.2	63.4	14.03	5.84
TRUE	High	Master Protein	O43765	Small glutamine-rich tetratricopeptide repeat-containing protein alpha OS=Homo sapiens OX=9606 GN=SGTA PE=1 SV=1	0	FALSE	52.546	28	8	41	8	1	313	34	4.87	109.39	8	metabolic process;regulation of biological process	cytoplasm;cytosol;membrane;nucleus	protein binding	Pf00515, Pf07719, Pf13181, Pf13414, Pf13424, Pf13431, Pf13432, Pf14559	6449	ENSG00000104969.9	SGTA	19			0	0.877	0.491	0.857	1.455	0.779	0.82076	0.0722387	0.813691	0.389872	0.744733	52.02	17.15	47.22	57.79	38.15	153.9	104.2	63.9	78	55.05	69.78
TRUE	High	Master Protein	P49366	Deoxyhypusine synthase OS=Homo sapiens OX=9606 GN=DHPS PE=1 SV=1	0	FALSE	64.52	32	7	55	7	1	369	40.9	5.36	194.7	7	cell organization and biogenesis;metabolic process;regulation of biological process	cytoplasm;cytosol	catalytic activity;protein binding	Pf01916	1725	ENSG00000095059.15	DHPS	19			0	0.955	0.489	0.711	1.345	0.701	0.987704	0.0692822	0.146292	0.637528	0.330535	33.21	9.48	26.33	52.95	25.79	124.7	131.8	55.2	88.4	21.56	29.24
TRUE	High	Master Protein	P05387	60S acidic ribosomal protein P2 OS=Homo sapiens OX=9606 GN=RPLP2 PE=1 SV=1	0	FALSE	95.155	86	8	99	7	1	115	11.7	4.54	336.38	8	cell organization and biogenesis;metabolic process;transport	cytosol;membrane;ribosome	protein binding;structural molecule activity	Pf00428	6181	ENSG00000177600.8	RPLP2	11	Ribosome	Cytoplasmic Ribosomal Proteins	1	0.842	0.488	0.829	1.351	0.677	0.224162	0.0167215	0.534814	0.355465	0.0731193	40.2	19.7	47.66	65.77	29.27	155.4	127.6	45.2	71.8	42.7	31.22
TRUE	High	Master Protein	P33240	Cleavage stimulation factor subunit 2 OS=Homo sapiens OX=9606 GN=CSTF2 PE=1 SV=1	0	FALSE	72.877	31	11	40	3	1	577	60.9	6.83	122.82	11	metabolic process	nucleus	protein binding;RNA binding	Pf00076, Pf13893, Pf14259, Pf14304, Pf14327	1478	ENSG00000101811.13	CSTF2	X	mRNA surveillance pathway	mRNA Processing	8	0.695	0.488	1.083	1.442	0.701	0.00589766	0.042302	0.988797	0.412129	0.235342	40.44	22.64	63.85	88.08	45.61	162	89.4	51	97.6	63.69	50.46
TRUE	High	Master Protein	Q96GA3	Protein LTV1 homolog OS=Homo sapiens OX=9606 GN=LTV1 PE=1 SV=1	0	FALSE	50.671	30	7	23	7	1	475	54.8	4.91	52.3	7	metabolic process;transport	cytosol;membrane;nucleus	protein binding	Pf04180	84946	ENSG00000135521.8	LTV1	6			0	1.174	0.482	0.83	1.713	0.818	0.364557	0.0707534	0.71405	0.0402369	0.854247	56.92	13.21	42.64	55.25	39.43	126.6	118.3	52.5	102.7	24.1	58.15
TRUE	High	Master Protein	Q52LW3	Rho GTPase-activating protein 29 OS=Homo sapiens OX=9606 GN=ARHGAP29 PE=1 SV=2	0	FALSE	52.002	14	13	32	12	1	1261	142	6.74	73.54	13	regulation of biological process;response to stimulus	cytoplasm;cytosol	enzyme regulator activity;metal ion binding;protein binding	Pf00130, Pf00620	9411	ENSG00000137962.12	ARHGAP29	1		Hypothetical Craniofacial Development Pathway	0	0.822	0.48	0.756	1.281	0.644	0.508285	0.0707534	0.494237	0.863622	0.317846	33.15	8.67	22.4	38.57	16.38	159.2	105.3	60.5	75.1	20.58	19.21
TRUE	High	Master Protein	P78330	Phosphoserine phosphatase OS=Homo sapiens OX=9606 GN=PSPH PE=1 SV=2	0	FALSE	28.186	39	5	20	5	1	225	25	5.69	60.25	5	metabolic process;response to stimulus	cytoplasm;cytosol	catalytic activity;metal ion binding;protein binding	Pf00702, Pf05822, Pf11019, Pf12710, Pf13419	5723	ENSG00000146733.13	PSPH	7	Carbon metabolism; Glycine, serine and threonine metabolism; Biosynthesis of amino acids; Metabolic pathways	Trans-sulfuration and one carbon metabolism	0	1.026	0.478	0.662	1.592	0.667	0.929413	0.0707534	0.0836666	0.126576	0.313348	33.11	12.26	22.55	57.13	17.95	104.6	132.9	57.3	105.3	33.99	40.7
TRUE	High	Master Protein	O15427	Monocarboxylate transporter 4 OS=Homo sapiens OX=9606 GN=SLC16A3 PE=1 SV=1	0	FALSE	19.727	11	5	42	5	1	465	49.4	7.96	72.9	5	cellular component movement;metabolic process;transport	membrane	protein binding;RNA binding;transporter activity	Pf07690	9123	ENSG00000141526.16	SLC16A3	17	Central carbon metabolism in cancer		0	0.808	0.478	0.795	1.408	0.725	0.364757	0.0707534	0.587212	0.485756	0.608469	33.94	15.59	35.9	59.96	32.64	120.1	114.4	78.9	86.6	10.99	5.65
TRUE	High	Master Protein	Q9NQP4	Prefoldin subunit 4 OS=Homo sapiens OX=9606 GN=PFDN4 PE=1 SV=1	0	FALSE	29.128	29	4	24	4	1	134	15.3	4.53	79.55	4	metabolic process	cytoplasm;cytosol;mitochondrion;nucleus	protein binding	Pf01920	5203	ENSG00000101132.9	PFDN4	20			0	0.922	0.478	0.922	1.221	0.868	0.931016	0.0697909	0.948387	0.932277	0.91238	59.56	19.32	56.26	68.19	64.29	198.8	82.6	44.7	73.9	52.94	95.93
TRUE	High	Master Protein	Q9H5V8	CUB domain-containing protein 1 OS=Homo sapiens OX=9606 GN=CDCP1 PE=1 SV=3	0	FALSE	67.979	18	13	48	13	1	836	92.9	7.96	145.2	13		extracellular;membrane	protein binding		64866	ENSG00000163814.7	CDCP1	3			0	0.913	0.477	0.563	1.065	0.516	0.876913	0.0171729	0.00143228	0.964638	0.0030925	31.87	9.29	16.02	51.22	10.93	130.2	143.2	62.3	64.3	9.98	21.39
TRUE	High	Master Protein	Q16850	Lanosterol 14-alpha demethylase OS=Homo sapiens OX=9606 GN=CYP51A1 PE=1 SV=3	0	FALSE	63.467	33	13	38	13	1	503	56.8	8.53	82.97	13	metabolic process;regulation of biological process	endoplasmic reticulum;membrane	catalytic activity;metal ion binding	Pf00067	1595		CYP51A1	7	Steroid biosynthesis; Metabolic pathways	Sterol Regulatory Element-Binding Proteins (SREBP) signalling; Oxidation by Cytochrome P450; Metapathway biotransformation; Cholesterol Biosynthesis	0	0.994	0.474	0.678	1.281	0.611	0.960998	0.0203567	0.121019	0.789382	0.0377842	32.85	7.71	27.17	34.28	16.45	142.7	104.1	66.4	86.9	14.4	24.4
TRUE	High	Master Protein	Q8WVX9	Fatty acyl-CoA reductase 1 OS=Homo sapiens OX=9606 GN=FAR1 PE=1 SV=1	0	FALSE	34.999	19	7	30	7	1	515	59.3	9.17	91.9	7	metabolic process	membrane;organelle lumen	catalytic activity	Pf01370, Pf03015, Pf07993	84188	ENSG00000197601.12	FAR1	11	Peroxisome		0	1.045	0.468	0.541	1.21	0.557	0.852286	0.0393842	0.00165404	0.920331	0.0258318	30.38	5.44	8.11	36.99	9	132.1	136.9	65.3	65.7	11.32	22.22
TRUE	High	Master Protein	O95817	BAG family molecular chaperone regulator 3 OS=Homo sapiens OX=9606 GN=BAG3 PE=1 SV=3	0	FALSE	81.949	41	12	52	12	1	575	61.6	6.95	162.99	12	cell death;metabolic process;regulation of biological process;response to stimulus	cytoplasm;cytosol;membrane;nucleus	enzyme regulator activity;nucleotide binding;protein binding	Pf00397, Pf02179	9531	ENSG00000151929.9	BAG3	10			0	0.7	0.467	0.951	1.722	0.639	0.00139281	0.0101001	0.970956	0.0352848	0.0849916	45.05	23.89	66.47	98.69	36.5	198.7	83.6	28.9	88.8	65.61	81.17
TRUE	High	Master Protein	Q86U90	YrdC domain-containing protein, mitochondrial OS=Homo sapiens OX=9606 GN=YRDC PE=1 SV=1	0	FALSE	37.539	34	6	24	6	1	279	29.3	8.57	70.78	6	metabolic process;regulation of biological process	cytoplasm;membrane;mitochondrion	catalytic activity;RNA binding	Pf01300	79693	ENSG00000196449.3	YRDC	1			0	0.871	0.466	0.759	1.414	0.671	0.755965	0.0520363	0.426937	0.481662	0.396422	19.42	7.57	30.04	49.99	25.66	126.2	103.6	63.1	107	9.33	19.01
TRUE	High	Master Protein	Q9Y617	Phosphoserine aminotransferase OS=Homo sapiens OX=9606 GN=PSAT1 PE=1 SV=2	0	FALSE	149.195	72	21	199	21	1	370	40.4	7.66	615.32	21	metabolic process	cytoplasm;cytosol	catalytic activity	Pf00266	29968	ENSG00000135069.13	PSAT1	9	Vitamin B6 metabolism; Carbon metabolism; Glycine, serine and threonine metabolism; Biosynthesis of amino acids; Metabolic pathways	Trans-sulfuration and one carbon metabolism	0	1.024	0.465	0.56	1.333	0.61	0.697815	0.00108812	1.87773e-05	0.32066	0.00810908	42	9.99	13.82	40.17	17.95	129.8	142.1	57	71.1	26.97	31.36
TRUE	High	Master Protein	O00425	Insulin-like growth factor 2 mRNA-binding protein 3 OS=Homo sapiens OX=9606 GN=IGF2BP3 PE=1 SV=2	0	FALSE	107.393	33	14	111	12	1	579	63.7	8.87	385.74	14	metabolic process;regulation of biological process;transport	cytoplasm;cytosol;membrane;nucleus	protein binding;RNA binding;translation regulator activity	Pf00013, Pf00076, Pf13014, Pf13893, Pf14259, Pf14611	10643	ENSG00000136231.13	IGF2BP3	7			0	1.144	0.463	0.507	1.244	0.562	0.193795	0.00625338	3.24132e-05	0.829563	0.00727546	45.15	7.95	16.52	52.28	15.19	134	154.9	47.6	63.5	20.38	40.78
TRUE	High	Master Protein	P18859	ATP synthase-coupling factor 6, mitochondrial OS=Homo sapiens OX=9606 GN=ATP5PF PE=1 SV=1	0	FALSE	19.26	41	3	15	3	1	108	12.6	9.52	45.62	3	cell organization and biogenesis;metabolic process;transport	membrane;mitochondrion	catalytic activity;transporter activity	Pf05511	522	ENSG00000154723.12	ATP5J	21	Huntington's disease; Parkinson's disease; Alzheimer's disease; Oxidative phosphorylation; Metabolic pathways	Oxidative phosphorylation; Electron Transport Chain	0	0.489	0.462	0.82	0.99	0.403	4.241e-08	0.049659	0.869193	0.952464	0.00176649	22.56	17.31	50.84	57.42	13.03	212.8	71.8	54.2	61.3	56.64	56.06
TRUE	High	Master Protein	Q9H7E9	UPF0488 protein C8orf33 OS=Homo sapiens OX=9606 GN=C8orf33 PE=1 SV=1	0	FALSE	22.789	37	4	15	4	1	229	25	9.95	12.5	4			protein binding	Pf15393	65265	ENSG00000182307.12	C8orf33	8			0	1.174	0.46	0.537	1.043	0.484	0.681529	0.0817508	0.207278	0.964638	0.0208159	39.84	9.61	24.11	76.63	23.95	278.2	40.7	36.2	45	167.72	119.73
TRUE	High	Master Protein	Q15742	NGFI-A-binding protein 2 OS=Homo sapiens OX=9606 GN=NAB2 PE=1 SV=1	0	FALSE	19.994	13	4	9	3	1	525	56.6	6.96	27.57	4	cell differentiation;cell proliferation;metabolic process;regulation of biological process	nucleus	protein binding	Pf04904, Pf04905	4665	ENSG00000166886.12	NAB2	12			1	0.802	0.459	0.549	1.276	0.442	0.521698	0.0838075	0.0336812	0.905629	0.00724458	11.14	10.43	12.3	64.72	4.51	131.2	105	102	61.9	59.31	81.82
TRUE	High	Master Protein	Q8WTV0	Scavenger receptor class B member 1 OS=Homo sapiens OX=9606 GN=SCARB1 PE=1 SV=1	0	FALSE	13.67	7	4	12	4	1	552	60.8	8.24	21.1	4	cell organization and biogenesis;cell proliferation;cellular component movement;metabolic process;regulation of biological process;response to stimulus;transport	cell surface;cytoplasm;membrane	protein binding;receptor activity;signal transducer activity;transporter activity	Pf01130	949	ENSG00000073060.15	SCARB1	12	Fat digestion and absorption; Ovarian steroidogenesis; Bile secretion; Phagosome; Aldosterone synthesis and secretion; Vitamin digestion and absorption; Hepatitis C	Vitamin A and Carotenoid Metabolism; Folate Metabolism; Sterol Regulatory Element-Binding Proteins (SREBP) signalling; Vitamin B12 Metabolism; Statin Pathway; Selenium Micronutrient Network	0	1.203	0.459	0.722	2.035	0.72	0.116669	0.0481362	0.16804	0.000240088	0.376229	53.13	18.18	34.2	114.9	37.46	84.2	151.1	50.4	114.3	61.14	21.49
TRUE	High	Master Protein	P13995	Bifunctional methylenetetrahydrofolate dehydrogenase/cyclohydrolase, mitochondrial OS=Homo sapiens OX=9606 GN=MTHFD2 PE=1 SV=2	0	FALSE	129.294	59	13	105	13	1	350	37.9	8.73	342.12	13	metabolic process	cytosol;mitochondrion;organelle lumen	catalytic activity;metal ion binding	Pf00763, Pf02882	10797	ENSG00000065911.11	MTHFD2	2	One carbon pool by folate; Metabolic pathways	Nucleotide Metabolism; Folate Metabolism; Trans-sulfuration and one carbon metabolism; One Carbon Metabolism	0	1.131	0.458	0.482	1.077	0.571	0.11557	0.0148571	3.45528e-07	0.964931	0.0118127	46.52	11.85	14.53	60.87	18.37	115.3	149.7	63.7	71.2	18.71	8.6
TRUE	High	Master Protein	P16144	Integrin beta-4 OS=Homo sapiens OX=9606 GN=ITGB4 PE=1 SV=5	0	FALSE	317.411	40	49	244	49	1	1822	202	6.09	667.7	49	cell communication;cell differentiation;cell organization and biogenesis;cellular component movement;metabolic process;regulation of biological process;response to stimulus	cell surface;membrane;nucleus	protein binding;receptor activity	Pf00041, Pf00362, Pf03160, Pf07965, Pf07974	3691	ENSG00000132470.13	ITGB4	17	Arrhythmogenic right ventricular cardiomyopathy (ARVC); Dilated cardiomyopathy; Focal adhesion; Regulation of actin cytoskeleton; ECM-receptor interaction; PI3K-Akt signaling pathway; Hypertrophic cardiomyopathy (HCM)	TGF-beta Signaling Pathway; Alpha 6 Beta 4 signaling pathway; Focal Adhesion-PI3K-Akt-mTOR-signaling pathway; Primary Focal Segmental Glomerulosclerosis FSGS; Arrhythmogenic Right Ventricular Cardiomyopathy; Focal Adhesion; Integrin-mediated Cell Adhesion; Regulation of Apoptosis by Parathyroid Hormone-related Protein	0	0.912	0.451	0.525	1.012	0.488	0.844304	0.000616604	1.28567e-06	0.86499	8.18081e-06	37.35	7.97	18.79	60.62	13.97	135	141.3	55.4	68.3	8.26	19.38
TRUE	High	Master Protein	P23229	Integrin alpha-6 OS=Homo sapiens OX=9606 GN=ITGA6 PE=1 SV=5	0	FALSE	160.08	32	27	146	27	1	1130	126.5	6.61	389.33	27	cell communication;cell differentiation;cell organization and biogenesis;cellular component movement;regulation of biological process;response to stimulus	cell surface;membrane	metal ion binding;protein binding	Pf01839, Pf08441, Pf13517	3655	ENSG00000091409.14	ITGA6	2	Arrhythmogenic right ventricular cardiomyopathy (ARVC); Dilated cardiomyopathy; Hematopoietic cell lineage; Cell adhesion molecules (CAMs); Pathways in cancer; Toxoplasmosis; Focal adhesion; Regulation of actin cytoskeleton; Small cell lung cancer; ECM-receptor interaction; PI3K-Akt signaling pathway; Hypertrophic cardiomyopathy (HCM)	Focal Adhesion-PI3K-Akt-mTOR-signaling pathway; Focal Adhesion; Integrin-mediated Cell Adhesion; Regulation of Apoptosis by Parathyroid Hormone-related Protein; Arrhythmogenic Right Ventricular Cardiomyopathy; Alpha 6 Beta 4 signaling pathway	0	0.977	0.447	0.548	1.174	0.518	0.981907	0.0134119	0.000172939	0.932277	0.00200389	32.2	9.38	15.76	62.63	12.41	137.4	131.2	54.3	77.2	18.84	8.02
TRUE	High	Master Protein	P21980	Protein-glutamine gamma-glutamyltransferase 2 OS=Homo sapiens OX=9606 GN=TGM2 PE=1 SV=2	0	FALSE	40.737	16	7	18	7	1	687	77.3	5.22	52.63	7	cell organization and biogenesis;cellular homeostasis;metabolic process;regulation of biological process;response to stimulus;transport	cytoplasm;cytosol;endoplasmic reticulum;membrane;mitochondrion	catalytic activity;metal ion binding;nucleotide binding;protein binding	Pf00868, Pf00927, Pf01841	7052	ENSG00000198959.11	TGM2	20	Huntington's disease		0	1.126	0.443	0.586	1.322	0.612	0.803258	0.0913967	0.0511595	0.862303	0.24174	64.45	9.12	23.11	84.59	25.95	135.4	154.5	34.6	75.4	41.39	38.91
TRUE	High	Master Protein	Q9ULX3	RNA-binding protein NOB1 OS=Homo sapiens OX=9606 GN=NOB1 PE=1 SV=1	0	FALSE	36.226	30	7	23	7	1	412	46.6	7.18	64.23	7	metabolic process	cytosol;nucleus	catalytic activity;metal ion binding	Pf08772, Pf15017	28987	ENSG00000141101.12	NOB1	16	Ribosome biogenesis in eukaryotes		0	1.032	0.436	0.807	3.045	0.784	0.919968	0.0135964	0.588276	5.06054e-11	0.725615	53.78	17.66	44.25	132.79	48.98	123.4	122	47.7	107	21.89	17.85
TRUE	High	Master Protein	P21579	Synaptotagmin-1 OS=Homo sapiens OX=9606 GN=SYT1 PE=1 SV=1	0	FALSE	21.109	11	4	22	4	1	422	47.5	8.12	57.91	4	cell communication;cell differentiation;cell organization and biogenesis;regulation of biological process;response to stimulus;transport	cytoplasm;Golgi;membrane	metal ion binding;protein binding	Pf00168	6857	ENSG00000067715.13	SYT1	12	Synaptic vesicle cycle	Synaptic Vesicle Pathway	0	0.978	0.435	0.47	1.106	0.4	0.996143	0.0191052	0.000206295	0.999666	0.000267565	36.88	6.76	7.86	42.38	6.38	170.3	151.4	38.6	39.7	56.18	54.09
TRUE	High	Master Protein	O00193	Small acidic protein OS=Homo sapiens OX=9606 GN=SMAP PE=1 SV=1	0	FALSE	47.178	22	4	43	4	1	183	20.3	4.72	140.78	4				Pf15477	10944	ENSG00000110696.9	C11orf58	11			0	0.617	0.434	0.905	1.024	0.562	0.0001469	0.0176126	0.939466	0.920331	0.0796989	18.36	19.48	44.61	110.87	24.18	178.1	87.2	64.5	70.2	37.56	38.09
TRUE	High	Master Protein	Q92974	Rho guanine nucleotide exchange factor 2 OS=Homo sapiens OX=9606 GN=ARHGEF2 PE=1 SV=4	0	FALSE	41.464	11	7	15	7	1	986	111.5	7.27	39.1	7	cell division;cell organization and biogenesis;defense response;regulation of biological process;response to stimulus;transport	cytoplasm;cytoskeleton;cytosol;Golgi;membrane	metal ion binding;protein binding	Pf00130, Pf00169, Pf00621, Pf07649	9181	ENSG00000116584.17	ARHGEF2	1	Pathogenic Escherichia coli infection	Pathogenic Escherichia coli infection	0	1.013	0.433	0.596	1.135	0.582	0.981907	0.0218352	0.114432	0.995735	0.139256	50.9	13.2	21.49	57.01	22	159.5	117.2	63.3	60	51.61	47.09
TRUE	High	Master Protein	P31949	Protein S100-A11 OS=Homo sapiens OX=9606 GN=S100A11 PE=1 SV=2	0	FALSE	40.106	65	5	20	5	1	105	11.7	7.12	68.24	5	regulation of biological process;response to stimulus;transport	cytoplasm;extracellular;nucleus;organelle lumen	metal ion binding;protein binding	Pf00036, Pf01023, Pf13499, Pf13833	6282	ENSG00000163191.5	S100A11	1			0	0.701	0.429	0.421	0.997	0.293	0.00165479	0.00877866	2.89984e-06	0.85867	1.60708e-08	30.39	23.57	15.81	105.38	7.84	111.9	144.7	92.8	50.6	53.78	51.15
TRUE	High	Master Protein	Q9H0H5	Rac GTPase-activating protein 1 OS=Homo sapiens OX=9606 GN=RACGAP1 PE=1 SV=1	0	FALSE	17.296	12	5	11	5	1	632	71	8.88	18.85	5	cell differentiation;cell division;cell organization and biogenesis;cell proliferation;cellular component movement;development;metabolic process;regulation of biological process;response to stimulus;transport	cytoplasm;cytoskeleton;cytosol;endosome;membrane;nucleus	catalytic activity;enzyme regulator activity;metal ion binding;nucleotide binding;protein binding	Pf00130, Pf00620, Pf07888	29127	ENSG00000161800.12	RACGAP1	12		Signal Transduction of S1P Receptor; Wnt Signaling Pathway and Pluripotency	0	0.808	0.428	0.834	1.634	0.704	0.616956	0.110746	0.897043	0.553866	0.611121	42.69	9.41	24.84	37.87	21.04	153	94.6	68.5	83.9	51.23	47.02
TRUE	High	Master Protein	P52292	Importin subunit alpha-1 OS=Homo sapiens OX=9606 GN=KPNA2 PE=1 SV=1	0	FALSE	185.164	74	23	229	23	1	529	57.8	5.4	747.27	23	metabolic process;regulation of biological process;transport	cytoplasm;cytosol;membrane;nucleus	protein binding;RNA binding;transporter activity	Pf00514, Pf01749, Pf13513, Pf13646	3838	ENSG00000182481.8	KPNA2	17	Influenza A		0	1.04	0.427	0.776	1.749	0.803	0.549026	0.000108226	0.169182	4.33229e-05	0.611121	40.16	8.4	33.35	66.43	37.34	121.7	122.1	60.9	95.3	10.15	7.87
TRUE	High	Master Protein	Q13332	Receptor-type tyrosine-protein phosphatase S OS=Homo sapiens OX=9606 GN=PTPRS PE=1 SV=3	0	FALSE	8.99	2	2	3	2	1	1948	216.9	6.46	7.7	2	metabolic process;regulation of biological process	membrane	catalytic activity;protein binding	Pf00041, Pf00047, Pf00102, Pf07679, Pf09294, Pf13895, Pf13927, Pf14566	5802	ENSG00000105426.16	PTPRS	19			0	0.323	0.426	0.77	0.772	0.288	1.98126e-07	0.102304	0.903741	0.727711	0.00482242	3.12	5.27	1.24	10.9	2.41	190	72.1	79.8	58.1	25.9	25.66
TRUE	High	Master Protein	Q9H2G2	STE20-like serine/threonine-protein kinase OS=Homo sapiens OX=9606 GN=SLK PE=1 SV=1	0	FALSE	76.841	22	18	61	17	1	1235	142.6	5.15	119.73	18	cell death;cell organization and biogenesis;metabolic process;regulation of biological process;response to stimulus	cytoplasm	catalytic activity;nucleotide binding;protein binding	Pf00069, Pf07714, Pf12474, Pf14531	9748	ENSG00000065613.13	SLK	10	Oocyte meiosis		1	0.988	0.422	0.737	1.564	0.705	0.969791	0.0146522	0.295072	0.178828	0.424069	38.23	6.09	31.1	72.54	32.4	158.2	144.3	48.3	49.2	16.36	12.36
TRUE	High	Master Protein	Q02241	Kinesin-like protein KIF23 OS=Homo sapiens OX=9606 GN=KIF23 PE=1 SV=3	0	FALSE	25.156	6	4	11	4	1	960	110	8.51	34.96	4	cell division;cell organization and biogenesis;cellular component movement;regulation of biological process;transport	cytoplasm;cytoskeleton;cytosol;nucleus	catalytic activity;motor activity;nucleotide binding;protein binding	Pf00225, Pf02463, Pf03938, Pf05852, Pf11559, Pf12329, Pf15294	9493	ENSG00000137807.13	KIF23	15	MicroRNAs in cancer		0	0.829	0.418	0.628	0.832	0.553	0.537405	0.0488055	0.0948573	0.741151	0.0827491	23.77	11.56	26.55	69.49	19.7	170.6	131.3	35.6	62.5	8.73	20.48
TRUE	High	Master Protein	Q9UHV9	Prefoldin subunit 2 OS=Homo sapiens OX=9606 GN=PFDN2 PE=1 SV=1	0	FALSE	39.175	32	5	57	5	1	154	16.6	6.58	171.89	5	metabolic process;regulation of biological process	cytoplasm;cytosol;mitochondrion;nucleus	protein binding	Pf01920	5202	ENSG00000143256.4	PFDN2	1			0	0.778	0.414	0.816	1.535	0.634	0.0399588	0.00215801	0.593877	0.077711	0.0727764	24.01	11.66	27.93	71.27	17.2	119.4	128.4	70.3	81.8	40.81	30.87
TRUE	High	Master Protein	P16070	CD44 antigen OS=Homo sapiens OX=9606 GN=CD44 PE=1 SV=3	0	FALSE	53.611	11	7	76	7	1	742	81.5	5.33	185.91	7	cell organization and biogenesis;cellular component movement;metabolic process;regulation of biological process;response to stimulus;transport	cell surface;cytosol;Golgi;membrane	protein binding;receptor activity;signal transducer activity	Pf00193	960	ENSG00000026508.17	CD44	11	Hematopoietic cell lineage; MicroRNAs in cancer; Epstein-Barr virus infection; Proteoglycans in cancer; ECM-receptor interaction; Shigellosis	Hepatitis C and Hepatocellular Carcinoma; Wnt Signaling Pathway and Pluripotency; Senescence and Autophagy in Cancer	0	1.119	0.411	0.629	1.517	0.715	0.0428229	0.000382331	0.0011276	0.0162623	0.179815	69.62	10.43	38.26	72.3	39.31	125.7	141.6	57.3	75.3	21.11	11.95
TRUE	High	Master Protein	Q9Y5L4	Mitochondrial import inner membrane translocase subunit Tim13 OS=Homo sapiens OX=9606 GN=TIMM13 PE=1 SV=1	0	FALSE	21.537	53	4	22	4	1	95	10.5	8.18	68.4	4	cell organization and biogenesis;transport	membrane;mitochondrion	metal ion binding;transporter activity	Pf02953	26517	ENSG00000099800.7	TIMM13	19			0	0.782	0.411	0.831	1.473	0.668	0.131079	0.000982817	0.708094	0.307571	0.13422	41.75	13.43	49.09	77.17	32.84	116	132	53.3	98.6	63.56	32.29
TRUE	High	Master Protein	Q9BYN0	Sulfiredoxin-1 OS=Homo sapiens OX=9606 GN=SRXN1 PE=1 SV=2	0	FALSE	8.372	14	2	4	2	1	137	14.3	8.19	9.8	2	metabolic process;response to stimulus	cytoplasm;cytosol	antioxidant activity;catalytic activity;nucleotide binding;protein binding	Pf02195	140809	ENSG00000271303.1	SRXN1	20		Photodynamic therapy-induced NFE2L2 (NRF2) survival signaling	0	0.762	0.405	0.893	1.6	0.719	0.538211	0.103961	0.964377	0.668312	0.664786	16.73	6.19	51.32	45.82	27.02	127.5	111.1	64.8	96.6	28.57	41.28
TRUE	High	Master Protein	Q13433	Zinc transporter ZIP6 OS=Homo sapiens OX=9606 GN=SLC39A6 PE=1 SV=3	0	FALSE	7.364	3	2	4	2	1	755	85	6.95	2.07	2	cellular homeostasis;transport	cell surface;endoplasmic reticulum;membrane	transporter activity	Pf02535	25800	ENSG00000141424.12	SLC39A6	18		NRF2 pathway; Zinc homeostasis	0	1.032	0.402	0.718	1.278	0.514	0.981907	0.0717795	0.745245	0.942466	0.257812	60.47	8.48	26.64	29.54	16.04	148	103.4	59.5	89.1	47.15	10.59
TRUE	High	Master Protein	P29317	Ephrin type-A receptor 2 OS=Homo sapiens OX=9606 GN=EPHA2 PE=1 SV=2	0	FALSE	123.387	30	18	80	17	1	976	108.2	6.23	216.95	18	cell death;cell differentiation;cell organization and biogenesis;cell proliferation;cellular component movement;defense response;development;metabolic process;regulation of biological process;response to stimulus	cell surface;membrane	catalytic activity;nucleotide binding;protein binding;receptor activity;signal transducer activity	Pf00041, Pf00069, Pf00536, Pf01404, Pf07647, Pf07699, Pf07714, Pf09294, Pf14575	1969	ENSG00000142627.12	EPHA2	1	Rap1 signaling pathway; Ras signaling pathway; Axon guidance; PI3K-Akt signaling pathway	NRF2 pathway; Focal Adhesion-PI3K-Akt-mTOR-signaling pathway	1	0.975	0.402	0.416	1.017	0.408	0.98899	0.000443949	1.97505e-08	0.919559	1.05595e-06	37.1	9.96	11.02	50.55	12.04	148.1	135	63.8	53	10.91	8.18
TRUE	High	Master Protein	Q9Y6H1	Coiled-coil-helix-coiled-coil-helix domain-containing protein 2 OS=Homo sapiens OX=9606 GN=CHCHD2 PE=1 SV=1	0	FALSE	17.618	34	3	30	3	1	151	15.5	9.22	70.64	3	cell organization and biogenesis;metabolic process;regulation of biological process	mitochondrion;nucleus	DNA binding;protein binding	Pf06747	51142	ENSG00000106153.12	CHCHD2	7			0	0.923	0.401	0.622	1.337	0.49	0.931998	0.004062	0.034628	0.696935	0.00448623	23.41	4.23	16.59	47.28	6.66	149.8	121.2	59.2	69.8	10.28	32.47
TRUE	High	Master Protein	Q6UWP2	Dehydrogenase/reductase SDR family member 11 OS=Homo sapiens OX=9606 GN=DHRS11 PE=1 SV=1	0	FALSE	7.127	11	2	3	2	1	260	28.3	6.64	6.28	2	metabolic process	extracellular	catalytic activity;nucleotide binding	Pf00106, Pf01370, Pf05368, Pf08659, Pf13460, Pf13561	79154	ENSG00000278535.4; ENSG00000275397.2	DHRS11	17; CHR_HSCHR17_7_CTG4			0	0.395	0.394	0.8	0.801	0.316	3.69223e-05	0.073937	0.933365	0.792527	0.00810908	25.73	25.63	22.77	22.86	12.97	190.1	75	74.9	60	105.2
TRUE	High	Master Protein	Q9H6H4	Receptor expression-enhancing protein 4 OS=Homo sapiens OX=9606 GN=REEP4 PE=1 SV=1	0	FALSE	20.971	13	2	7	2	1	257	29.4	9.73	33.47	2	cell division;cell organization and biogenesis	endoplasmic reticulum;membrane	protein binding	Pf03134	80346	ENSG00000168476.11	REEP4	8			0	1.257	0.393	0.773	1.963	0.829	0.491453	0.0626317	0.743763	0.213239	0.875718	21.26	11.06	38.56	94.07	56.88	139.6	103.1	66.9	90.4	33.05	72.42
TRUE	High	Master Protein	Q5JTJ3	Cytochrome c oxidase assembly factor 6 homolog OS=Homo sapiens OX=9606 GN=COA6 PE=1 SV=1	0	FALSE	12.522	21	2	17	2	1	125	14.1	8.25	41.79	2	cell organization and biogenesis;metabolic process	membrane;mitochondrion	catalytic activity;metal ion binding;protein binding;RNA binding;transporter activity	Pf02297	388753	ENSG00000168275.14	COA6	1			0	0.763	0.387	0.924	1.469	0.716	0.505452	0.0561966	0.979704	0.776234	0.638282	20.85	12.09	37.29	71.66	26.44	139.7	107.4	50	102.9	38.04	30.67
TRUE	High	Master Protein	Q6P1X5	Transcription initiation factor TFIID subunit 2 OS=Homo sapiens OX=9606 GN=TAF2 PE=1 SV=3	0	FALSE	7.528	4	2	2	2	1	1199	136.9	8.19	3.42	2	cell organization and biogenesis;metabolic process;regulation of biological process;response to stimulus	nucleus	catalytic activity;DNA binding;metal ion binding;protein binding	Pf01433	6873	ENSG00000064313.11	TAF2	8	Basal transcription factors		0	1.461	0.384	1.146	2.094	0.734	0.28681	0.111974	0.985712	0.129705	0.767539	38.4	8.73	95.09	86.62	37.65	33.7	154.4	66.4	145.5	35.46	60.49
TRUE	High	Master Protein	O14737	Programmed cell death protein 5 OS=Homo sapiens OX=9606 GN=PDCD5 PE=1 SV=3	0	FALSE	36.162	38	5	40	5	1	125	14.3	6.04	130.09	5	cell death;regulation of biological process;response to stimulus	cytoplasm;cytosol;nucleus	DNA binding;enzyme regulator activity;protein binding	Pf01984	9141	ENSG00000105185.11	PDCD5	19			0	0.69	0.384	0.82	1.149	0.564	0.0002624	5.54597e-05	0.582291	0.976357	0.0193762	49.21	18.42	42.04	104.62	33.65	194.9	96.5	34.6	74	66.32	69.21
TRUE	High	Master Protein	Q9ULC5	Long-chain-fatty-acid--CoA ligase 5 OS=Homo sapiens OX=9606 GN=ACSL5 PE=1 SV=1	0	FALSE	181.721	52	26	173	25	1	683	75.9	6.92	543.31	26	metabolic process;regulation of biological process	endoplasmic reticulum;membrane;mitochondrion;nucleus	catalytic activity;nucleotide binding	Pf00501	51703	ENSG00000197142.10	ACSL5	10	Peroxisome; Fatty acid degradation; PPAR signaling pathway; Fatty acid biosynthesis; Metabolic pathways; Adipocytokine signaling pathway; Fatty acid metabolism	PPAR signaling pathway; Fatty Acid Beta Oxidation; Fatty Acid Biosynthesis	1	1	0.382	0.386	1.039	0.378	0.874064	0.000125459	2.56012e-12	0.919559	1.26263e-09	51.8	9.79	11.69	87.35	9.65	143.3	151.7	53.3	51.7	28.06	35.73
TRUE	High	Master Protein	O43688	Phospholipid phosphatase 2 OS=Homo sapiens OX=9606 GN=PLPP2 PE=1 SV=1	0	FALSE	11.92	10	2	5	2	1	288	32.6	8.35	17.27	2	metabolic process;regulation of biological process;response to stimulus	membrane	catalytic activity;protein binding	Pf01569	8612	ENSG00000141934.9	PPAP2C; PLPP2	19	Fat digestion and absorption; Ether lipid metabolism; Phospholipase D signaling pathway; Glycerolipid metabolism; Sphingolipid metabolism; Choline metabolism in cancer; Glycerophospholipid metabolism; Fc gamma R-mediated phagocytosis; Metabolic pathways	Triacylglyceride Synthesis	0	0.49	0.382	0.599	1.096	0.293	0.0659519	0.0911124	0.581002	0.999666	0.0245101	10.6	1.46	17.02	56.62	8.26	114.5	56.1	195.9	33.6	129.67	134.77
TRUE	High	Master Protein	P28290	Protein ITPRID2 OS=Homo sapiens OX=9606 GN=ITPRID2 PE=1 SV=3	0	FALSE	142.241	30	22	70	22	1	1259	138.3	5.19	192.28	22		cytoplasm;cytosol;membrane;nucleus	protein binding	Pf14722, Pf14723	6744	ENSG00000138434.16	SSFA2	2			0	0.942	0.364	0.533	1.263	0.463	0.963379	6.41531e-05	1.82277e-05	0.659833	4.93488e-06	31.37	6.99	20.31	57.85	14.26	116.1	122.9	68.2	92.9	12.26	26.24
TRUE	High	Master Protein	P15104	Glutamine synthetase OS=Homo sapiens OX=9606 GN=GLUL PE=1 SV=4	0	FALSE	77.623	39	12	58	12	1	373	42	6.89	190.16	12	cell communication;cell organization and biogenesis;cell proliferation;metabolic process;regulation of biological process;response to stimulus;transport	cytoplasm;cytosol;endoplasmic reticulum;mitochondrion;nucleus	catalytic activity;metal ion binding;nucleotide binding;protein binding	Pf00120, Pf03951	2752	ENSG00000135821.17	GLUL	1	Arginine biosynthesis; Glutamatergic synapse; Alanine, aspartate and glutamate metabolism; Biosynthesis of amino acids; GABAergic synapse; Nitrogen metabolism; Metabolic pathways; Glyoxylate and dicarboxylate metabolism	TNF alpha Signaling Pathway; Amino Acid metabolism	0	1.453	0.363	0.275	1.337	0.438	1.4544e-06	8.81662e-05	3.26911e-16	0.696817	1.01335e-05	62.21	11.2	3.54	46.82	14.31	124.4	195	32.3	48.3	65.53	6.56
TRUE	High	Master Protein	P52815	39S ribosomal protein L12, mitochondrial OS=Homo sapiens OX=9606 GN=MRPL12 PE=1 SV=2	0	FALSE	59.275	48	7	56	7	1	198	21.3	8.87	189.11	7	cell organization and biogenesis;metabolic process;regulation of biological process	membrane;mitochondrion;ribosome	protein binding;RNA binding;structural molecule activity	Pf00542	6182	ENSG00000262814.7	MRPL12	17	Ribosome		0	0.737	0.354	0.756	1.116	0.458	0.00350297	0.000116435	0.271487	0.995184	7.44646e-05	47.19	12.4	49.04	104.57	18.08	195.6	97.3	42.4	64.6	58.82	64.07
TRUE	High	Master Protein	Q16763	Ubiquitin-conjugating enzyme E2 S OS=Homo sapiens OX=9606 GN=UBE2S PE=1 SV=2	0	FALSE	15.474	15	3	15	3	1	222	23.8	8.38	35.02	3	cell division;cell organization and biogenesis;metabolic process	cytoplasm;cytosol	catalytic activity;nucleotide binding;protein binding	Pf00179	27338	ENSG00000108106.13	UBE2S	19	Ubiquitin mediated proteolysis		0	0.759	0.353	0.817	1.675	0.638	0.154897	0.00102133	0.694004	0.141962	0.33568	21.62	5.49	25.74	41.56	15.15	132	121.6	45.9	100.4	14.7	17.84
TRUE	High	Master Protein	P82970	High mobility group nucleosome-binding domain-containing protein 5 OS=Homo sapiens OX=9606 GN=HMGN5 PE=1 SV=1	0	FALSE	9.337	14	2	3	2	1	282	31.5	4.55	8.37	2	cell organization and biogenesis;metabolic process;regulation of biological process	chromosome;nucleus	DNA binding;protein binding;RNA binding	Pf01101	79366	ENSG00000198157.10	HMGN5	X			0	0.674	0.352	1.599	2.402	1.087	0.116669	0.0293763	0.538796	0.0456306	0.97884	30.68	3.86	35.09	47.38	47.16	156.1	68.6	48.2	127.1	15.45	55.61
TRUE	High	Master Protein	Q8NFU3	Thiosulfate:glutathione sulfurtransferase OS=Homo sapiens OX=9606 GN=TSTD1 PE=1 SV=3	0	FALSE	20.149	49	2	14	2	1	115	12.5	6.07	57.25	2	metabolic process	cytoplasm;cytosol;mitochondrion	catalytic activity	Pf00581, Pf14566	100131187	ENSG00000215845.10	TSTD1	1			0	0.46	0.351	1.495	2.178	0.657	7.36471e-08	0.0029397	0.495208	0.0312917	0.370455	24.63	12.91	86	73.95	31.5	208.4	71.7	37	82.9	43.72	109.88
TRUE	High	Master Protein	O75347	Tubulin-specific chaperone A OS=Homo sapiens OX=9606 GN=TBCA PE=1 SV=3	0	FALSE	65.416	56	10	73	10	1	108	12.8	5.29	225.55	10	cell organization and biogenesis;metabolic process	cytoplasm;cytoskeleton	protein binding;RNA binding	Pf02970	6902	ENSG00000171530.13	TBCA	5			0	0.708	0.348	0.919	2.299	0.648	0.000950018	9.81058e-05	0.920908	1.57717e-07	0.0963219	34.41	11.65	56.39	101.48	33.71	206.7	82.4	26.9	84	47.85	143.82
TRUE	High	Master Protein	P06753	Tropomyosin alpha-3 chain OS=Homo sapiens OX=9606 GN=TPM3 PE=1 SV=2	0	FALSE	88.035	31	14	136	7	1	285	32.9	4.72	388.9	14	cell organization and biogenesis;cellular component movement	cytoplasm;cytoskeleton;cytosol	protein binding;structural molecule activity	Pf00261, Pf12718	7170	ENSG00000143549.19	TPM3	1	Dilated cardiomyopathy; Pathways in cancer; Adrenergic signaling in cardiomyocytes; Thyroid cancer; Cardiac muscle contraction; Hypertrophic cardiomyopathy (HCM)	Striated Muscle Contraction	2	0.813	0.327	1.278	3.952	1.017	0.118692	2.38453e-06	0.576175	3.05343e-16	0.975532	55.53	13.11	94.83	113.97	94.32	152.1	61.2	32.3	154.4	49.12	74.97
TRUE	High	Master Protein	Q96QD8	Sodium-coupled neutral amino acid transporter 2 OS=Homo sapiens OX=9606 GN=SLC38A2 PE=1 SV=2	0	FALSE	41.376	12	4	25	4	1	506	56	8	102.82	4	cell communication;response to stimulus;transport	membrane	protein binding;transporter activity	Pf01490	54407	ENSG00000134294.13	SLC38A2	12	Glutamatergic synapse; Protein digestion and absorption; GABAergic synapse	Endochondral Ossification	0	0.603	0.325	0.54	1.247	0.354	2.17217e-07	2.84393e-06	0.000564399	0.863622	1.418e-08	15.64	2.77	12.54	27.04	7.59	175.7	118.6	49.3	56.4	19.36	37.38
TRUE	High	Master Protein	Q07973	1,25-dihydroxyvitamin D(3) 24-hydroxylase, mitochondrial OS=Homo sapiens OX=9606 GN=CYP24A1 PE=1 SV=2	0	FALSE	20.445	13	5	8	5	1	514	58.8	8.75	18.37	5	cell communication;cell differentiation;metabolic process;regulation of biological process;response to stimulus	membrane;mitochondrion;nucleus	catalytic activity;metal ion binding	Pf00067	1591	ENSG00000019186.9	CYP24A1	20	MicroRNAs in cancer; Steroid biosynthesis; Metabolic pathways	Metapathway biotransformation; Vitamin D Metabolism; Oxidation by Cytochrome P450; Nuclear Receptors in Lipid Metabolism and Toxicity	0	1.373	0.323	0.275	0.835	0.229	0.312544	0.0151599	0.0055833	0.82979	1.2679e-05	30.88	2.58	6.5	42.05	3.63	265.3	75.7	26.3	32.7	5.97	103.32
TRUE	High	Master Protein	P48436	Transcription factor SOX-9 OS=Homo sapiens OX=9606 GN=SOX9 PE=1 SV=1	0	FALSE	20.726	14	5	7	5	1	509	56.1	6.81	12.97	5	cell communication;cell differentiation;cell growth;cell organization and biogenesis;cell proliferation;metabolic process;regulation of biological process;response to stimulus	nucleus	catalytic activity;DNA binding;protein binding;RNA binding	Pf00505, Pf09011, Pf12444	6662	ENSG00000125398.5	SOX9	17	cAMP signaling pathway	Spinal Cord Injury; Endochondral Ossification; Neural Crest Differentiation	0	0.796	0.315	0.25	0.484	0.227	0.616918	0.016972	1.7854e-05	0.0791099	3.88663e-06	18.46	8.57	2.1	26.52	3.06	184.4	138.6	45.6	31.4	21.23	8.17
TRUE	High	Master Protein	P0C5J1	Putative protein N-methyltransferase FAM86B2 OS=Homo sapiens OX=9606 GN=FAM86B2 PE=1 SV=1	0	FALSE	6.572	6	2	6	2	1	330	36.7	6.28	10.08	2	metabolic process		catalytic activity;protein binding	Pf08242, Pf10294, Pf12847, Pf13659, Pf14904	653333	ENSG00000145002.12	FAM86B2	8			0	0.968	0.312	0.79	2.447	0.765	0.990085	0.0911124	0.91391	0.287513	0.874277	14.48	0	9.64	0	0	131.4	127.1	41	100.4		14.66
TRUE	High	Master Protein	P62760	Visinin-like protein 1 OS=Homo sapiens OX=9606 GN=VSNL1 PE=1 SV=2	0	FALSE	37.423	39	6	25	6	1	191	22.1	5.15	75.65	6	regulation of biological process	cytosol;membrane	metal ion binding;protein binding	Pf00036, Pf13202, Pf13405, Pf13499, Pf13833	7447	ENSG00000163032.11	VSNL1	2			0	0.755	0.296	0.536	1.265	0.413	0.035482	3.49928e-06	0.00192106	0.862913	3.38571e-06	33.34	5.15	24.07	74.45	16.55	142.5	112.4	36.5	108.6	59.56	32.09
TRUE	High	Master Protein	O76080	AN1-type zinc finger protein 5 OS=Homo sapiens OX=9606 GN=ZFAND5 PE=1 SV=1	0	FALSE	7.853	18	2	4	2	1	213	23.1	8.51	2.75	2	cellular component movement;regulation of biological process;response to stimulus	cytoplasm	DNA binding;metal ion binding;protein binding	Pf01428, Pf01754	7763	ENSG00000107372.12	ZFAND5	9			0	1.145	0.287	0.634	2.403	0.802	0.92523	0.0570232	0.685516	0.343296	0.911137	52.49	3.06	39.81	103.48	56.92	170.9	110.2	9.7	109.3	58.52	114.05
TRUE	High	Master Protein	Q9H2H9	Sodium-coupled neutral amino acid transporter 1 OS=Homo sapiens OX=9606 GN=SLC38A1 PE=1 SV=1	0	FALSE	9.127	7	2	3	2	1	487	54	7.02	4.38	2	transport	membrane	protein binding;transporter activity	Pf01490	81539	ENSG00000111371.15	SLC38A1	12	Glutamatergic synapse; GABAergic synapse	Synaptic Vesicle Pathway	0	1.034	0.284	0.536	2.112	0.554	0.990085	0.0295524	0.389824	0.487776	0.430755	49.38	2.44	13.1	42.28	15.16	160	146.4	36.1	57.5	3.99	18.65
TRUE	High	Master Protein	Q99661	Kinesin-like protein KIF2C OS=Homo sapiens OX=9606 GN=KIF2C PE=1 SV=2	0	FALSE	25.295	12	6	12	5	1	725	81.3	7.83	26.26	6	cell division;cell organization and biogenesis;cell proliferation;cellular component movement;regulation of biological process;transport	chromosome;cytoplasm;cytoskeleton;cytosol;membrane;nucleus	catalytic activity;DNA binding;motor activity;nucleotide binding;protein binding	Pf00225	11004	ENSG00000142945.12	KIF2C	1		Regulation of Microtubule Cytoskeleton	0	0.842	0.274	0.726	2.94	0.668	0.782206	0.00350553	0.575666	0.00465726	0.516108	29.8	4.25	17.43	25.32	13.24	166.3	124.2	47.9	61.6	18.6	56.16
TRUE	High	Master Protein	P01033	Metalloproteinase inhibitor 1 OS=Homo sapiens OX=9606 GN=TIMP1 PE=1 SV=1	0	FALSE	23.562	34	5	10	5	1	207	23.2	8.1	17.27	5	cell organization and biogenesis;metabolic process;regulation of biological process;response to stimulus;transport	extracellular;organelle lumen	enzyme regulator activity;metal ion binding;protein binding	Pf00965	7076	ENSG00000102265.11	TIMP1	X	HIF-1 signaling pathway	IL-6 signaling pathway; Lung fibrosis; IL1 and megakaryocytes in obesity; Matrix Metalloproteinases	0	1.429	0.265	1.098	2.454	1.578	0.108176	0.00285753	0.988797	0.000102158	0.376229	60.77	3.55	50.13	79.44	55.09	75.4	150.7	26	147.9	98.54	34.66
TRUE	High	Master Protein	Q9UPT9	Ubiquitin carboxyl-terminal hydrolase 22 OS=Homo sapiens OX=9606 GN=USP22 PE=1 SV=2	0	FALSE	14.176	9	2	3	2	1	525	59.9	8.05	12.93	2	cell organization and biogenesis;metabolic process;regulation of biological process	nucleus	catalytic activity;metal ion binding;protein binding	Pf00443, Pf02148, Pf13423	23326	ENSG00000124422.11	USP22	17			0	0.982	0.255	0.694	2.429	0.621	0.98899	0.0247963	0.611694	0.0426048	0.638953	16.87	4.45	22.84	52.71	19.23	89.7	152.5	48.9	108.9	58.03
TRUE	High	Master Protein	O95235	Kinesin-like protein KIF20A OS=Homo sapiens OX=9606 GN=KIF20A PE=1 SV=1	0	FALSE	10.047	4	3	4	3	1	890	100.2	6.92	4.17	3	cell organization and biogenesis;cellular component movement;transport	cytoplasm;cytoskeleton;Golgi	catalytic activity;motor activity;nucleotide binding;protein binding;transporter activity	Pf00225	10112	ENSG00000112984.11	KIF20A	5			0	0.79	0.255	1.024	3.78	0.932	0.902551	0.0597091	0.999922	0.034695	0.977425	21.71	4.24	21.17	66.56	14.08	128.1	119.5	30	122.4	13.86	100.99
TRUE	High	Master Protein	Q99988	Growth/differentiation factor 15 OS=Homo sapiens OX=9606 GN=GDF15 PE=1 SV=3	0	FALSE	42.177	39	8	24	8	1	308	34.1	9.66	63.9	8	cell communication;regulation of biological process;response to stimulus	cytoplasm;extracellular;nucleus	protein binding	Pf00019	9518	ENSG00000130513.6	GDF15	19			0	0.957	0.24	0.419	1.476	0.335	0.989905	1.80015e-08	6.12369e-06	0.771037	6.40944e-06	59.27	4.13	11.9	90.73	8.15	181.8	159.8	34.9	23.5	30.85	27.99
TRUE	High	Master Protein	P35754	Glutaredoxin-1 OS=Homo sapiens OX=9606 GN=GLRX PE=1 SV=2	0	FALSE	19.76	43	3	7	3	1	106	11.8	8.09	23.99	3	cellular homeostasis;metabolic process;regulation of biological process;transport	cytoplasm;cytosol;mitochondrion;nucleus	catalytic activity;protein binding	Pf00462, Pf05768, Pf13098, Pf13417, Pf13462	2745	ENSG00000173221.13	GLRX	5		One Carbon Metabolism	0	0.637	0.225	0.502	1.079	0.346	0.0165815	6.74231e-06	0.0620108	0.990069	0.000273151	36.44	4.6	13.27	56.2	11.96	152.6	132	73.3	42.1	102.82	14.19
TRUE	High	Master Protein	Q96HA7	Tonsoku-like protein OS=Homo sapiens OX=9606 GN=TONSL PE=1 SV=2	0	FALSE	17.681	8	4	7	4	1	1378	150.8	6.42	14.22	4	metabolic process;regulation of biological process;response to stimulus	cytoplasm;nucleus	protein binding	Pf00023, Pf12796, Pf13414, Pf13424, Pf13606, Pf13637, Pf13855, Pf13857	4796	ENSG00000160949.16	TONSL	8			0	1.058	0.22	0.404	2.017	0.428	0.979547	0.00757748	0.073637	0.642498	0.221549	5.21	0.49	0	0	0.95	187.9	107.2	61.6	43.4	81.13
TRUE	High	Master Protein	P36873	Serine/threonine-protein phosphatase PP1-gamma catalytic subunit OS=Homo sapiens OX=9606 GN=PPP1CC PE=1 SV=1	0	FALSE	137.686	60	16	137	2	1	323	37	6.54	554.23	16	cell differentiation;cell division;cell organization and biogenesis;metabolic process;regulation of biological process;response to stimulus	chromosome;cytoplasm;cytosol;membrane;mitochondrion;nucleus	catalytic activity;metal ion binding;protein binding;RNA binding	Pf00149	5501	ENSG00000186298.11	PPP1CC	12	Dopaminergic synapse; Vascular smooth muscle contraction; Insulin signaling pathway; Amphetamine addiction; cGMP-PKG signaling pathway; Hippo signaling pathway; Oxytocin signaling pathway; Long-term potentiation; Adrenergic signaling in cardiomyocytes; Focal adhesion; Proteoglycans in cancer; Regulation of actin cytoskeleton; mRNA surveillance pathway; Oocyte meiosis; Herpes simplex infection; In…	Common Pathways Underlying Drug Addiction	0	0.878	0.21	0.736	2.853	0.51	0.89813	0.000913226	0.824216	0.0690976	0.289926	177.59	10.13	31.07	83.83	37.49	124	109.9	26	140	118.96	1.41
TRUE	High	Master Protein	P53609	Geranylgeranyl transferase type-1 subunit beta OS=Homo sapiens OX=9606 GN=PGGT1B PE=1 SV=2	0.001	FALSE	5.985	6	2	5	2	1	377	42.3	6.83	9.55	2	metabolic process;regulation of biological process;response to stimulus		catalytic activity;metal ion binding	Pf00432, Pf13249	5229	ENSG00000164219.9	PGGT1B	5			0	0.844	0.206	1.895	5.01	1.366	0.863173	0.000133298	0.426432	5.88454e-05	0.88909	49.15	1.06	80.75	89.05	72.55	143.9	78.2	29.6	148.3	56.78	53.72
TRUE	High	Master Protein	P08243	Asparagine synthetase [glutamine-hydrolyzing] OS=Homo sapiens OX=9606 GN=ASNS PE=1 SV=4	0	FALSE	221.236	65	30	222	30	1	561	64.3	6.86	680.06	30	cell communication;metabolic process;regulation of biological process;response to stimulus	cytosol	catalytic activity;nucleotide binding;protein binding	Pf00310, Pf00733, Pf12481, Pf13522, Pf13537	440	ENSG00000070669.16	ASNS	7	Alanine, aspartate and glutamate metabolism; Metabolic pathways	Photodynamic therapy-induced unfolded protein response; Amino Acid metabolism	0	1.068	0.192	0.252	1.269	0.272	0.279281	3.81902e-16	3.26911e-16	0.637528	3.35161e-16	64.45	2.56	4.04	62.5	6.57	137.1	202.6	23	37.3	35.33	47.15
TRUE	High	Master Protein	Q9ULF5	Zinc transporter ZIP10 OS=Homo sapiens OX=9606 GN=SLC39A10 PE=1 SV=2	0	FALSE	30.727	10	6	16	6	1	831	94.1	6.76	30.61	6	cellular homeostasis;regulation of biological process;transport	membrane	transporter activity	Pf02535, Pf14667	57181	ENSG00000196950.13	SLC39A10	2		NRF2 pathway; Zinc homeostasis	0	0.828	0.185	0.368	1.522	0.302	0.530915	2.77284e-10	2.02649e-06	0.738643	4.45696e-06	34.33	1.88	9.73	68.51	7.73	169.3	176.6	33	21.1	72.53	61.04
TRUE	High	Master Protein	O95166	Gamma-aminobutyric acid receptor-associated protein OS=Homo sapiens OX=9606 GN=GABARAP PE=1 SV=1	0.002	FALSE	4.891	20	2	6	2	1	117	13.9	8.79	13.45	2	cell communication;cell death;cell organization and biogenesis;metabolic process;regulation of biological process;response to stimulus;transport	cytoplasm;cytoskeleton;cytosol;endoplasmic reticulum;Golgi;membrane;vacuole	protein binding	Pf02991, Pf04110	11337	ENSG00000170296.9	GABARAP	17	NOD-like receptor signaling pathway; FoxO signaling pathway; Autophagy; GABAergic synapse	Senescence and Autophagy in Cancer	0	0.573	0.159	1.417	4.36	0.85	0.0808016	0.000225047	0.829858	4.24313e-05	0.93056	5.25	2.99	10.28	110.86	17.98	144.1	107.1	24.2	124.7	55.61	26.99
TRUE	High	Master Protein	Q92844	TRAF family member-associated NF-kappa-B activator OS=Homo sapiens OX=9606 GN=TANK PE=1 SV=2	0	FALSE	34.143	23	5	6	5	1	425	47.8	5.68	26.45	5	metabolic process;regulation of biological process;response to stimulus	cytoplasm;cytosol	catalytic activity;enzyme regulator activity;metal ion binding;protein binding	Pf12845	10010	ENSG00000136560.13	TANK	2	NOD-like receptor signaling pathway; RIG-I-like receptor signaling pathway	RIG-I-like Receptor Signaling; TNF alpha Signaling Pathway; Structural Pathway of Interleukin 1 (IL-1)	0	0.513	0.137	0.423	1.898	0.33	0.0812731	5.0155e-05	0.163888	0.623346	0.0181092	33.1	2.64	6.66	95.61	6.61	221.9	4.9	17.5	155.8	94.65	170.51
TRUE	High	Master Protein	Q9C004	Protein sprouty homolog 4 OS=Homo sapiens OX=9606 GN=SPRY4 PE=1 SV=2	0	FALSE	18.52	19	4	12	4	1	299	32.5	7.88	41.79	4	development;regulation of biological process	cytoplasm;membrane	protein binding	Pf05210	81848	ENSG00000187678.8	SPRY4	5			0	0.913	0.105	0.187	1.266	0.166	0.90617	3.81902e-16	3.26911e-16	0.952464	4.63824e-13	32.14	0.67	3	43.54	1.67	198.9	156.6	19.4	25.2	10.35	18.17
TRUE	High	Master Protein	Q6ZRS2	Helicase SRCAP OS=Homo sapiens OX=9606 GN=SRCAP PE=1 SV=3	0.009	FALSE	3.248	0	2	5	2	1	3230	343.3	5.96	2.33	2	cell organization and biogenesis;metabolic process;regulation of biological process	Golgi;nucleus	catalytic activity;DNA binding;nucleotide binding;protein binding	Pf00176, Pf00271, Pf07529	10847	ENSG00000080603.16	SRCAP	16		Pathways Affected in Adenoid Cystic Carcinoma	0	1.252	0.095	1.045	3.592	1.308	0.436846	5.52078e-12	0.999922	4.0955e-06	0.820002	140.53	1.18	143.24	146.43	143.24	110.1	137.8	8.2	144	71.22	96.24
TRUE	High	Master Protein	Q53EP0	Fibronectin type III domain-containing protein 3B OS=Homo sapiens OX=9606 GN=FNDC3B PE=1 SV=2	0.002	FALSE	4.898	3	2	3	2	1	1204	132.8	5.95	0	2		membrane	protein binding;RNA binding	Pf00041	64778	ENSG00000075420.12	FNDC3B	3			0	1.144	0.01	0.967	100	1.106	0.931016	3.81902e-16	0.990597	3.05343e-16	0.985678	45.35		34.46		40.01	130.2	137.2		132.6	32.26	44.59
TRUE	Medium	Master Protein	Q86VP3	Phosphofurin acidic cluster sorting protein 2 OS=Homo sapiens OX=9606 GN=PACS2 PE=1 SV=3	0.017	FALSE	2.74	4	2	7	2	1	889	97.6	6.6	0	2	cell death;cell organization and biogenesis	endoplasmic reticulum;mitochondrion	protein binding	Pf10254	23241	ENSG00000179364.13	PACS2	14			0	0.969	0.01	1.647	100	1.175	0.999944	3.81902e-16	0.740708	3.05343e-16	0.969017	24.76		54.25		55.26	103.7	105.8		190.5	11.29	33.76
TRUE	High	Master Protein	P53350	Serine/threonine-protein kinase PLK1 OS=Homo sapiens OX=9606 GN=PLK1 PE=1 SV=1	0	FALSE	7.522	10	3	4	3	1	603	68.2	8.91	0	3	cell division;cell organization and biogenesis;cell proliferation;metabolic process;regulation of biological process;response to stimulus	chromosome;cytoplasm;cytoskeleton;cytosol;nucleus	catalytic activity;metal ion binding;nucleotide binding;protein binding	Pf00069, Pf00659, Pf07714, Pf14531	5347	ENSG00000166851.14	PLK1	16	FoxO signaling pathway; Progesterone-mediated oocyte maturation; Oocyte meiosis; Cell cycle	Regulation of toll-like receptor signaling pathway; Cell Cycle; Integrated Cancer pathway; TNF alpha Signaling Pathway	0	0.01	0.01	100	100	0.512	4.12715e-16	3.81902e-16	3.26911e-16	3.05343e-16	0.414053					1.13	267.2			132.8	29.66
TRUE	High	Master Protein	Q8NFQ8	Torsin-1A-interacting protein 2 OS=Homo sapiens OX=9606 GN=TOR1AIP2 PE=1 SV=1	0.001	FALSE	5.877	7	2	2	2	1	470	51.2	4.96	5.21	2	cell organization and biogenesis;regulation of biological process	endoplasmic reticulum;membrane;nucleus	enzyme regulator activity;protein binding	Pf05609	163590	ENSG00000169905.12	TOR1AIP2	1			0	0.957	0.01	0.386	100	0.553	0.987145	3.81902e-16	0.0189159	3.05343e-16	0.456172	45.27		9.85		24.98	158.9	205.5		35.6	61.75	54.68
TRUE	High	Master Protein	A0AVF1	Intraflagellar transport protein 56 OS=Homo sapiens OX=9606 GN=TTC26 PE=2 SV=1	0	FALSE	9.43	9	3	3	3	1	554	64.1	6.93	3.63	3	cell organization and biogenesis;cellular component movement;regulation of biological process;response to stimulus;transport		protein binding	Pf12895, Pf13414, Pf14559	79989	ENSG00000105948.13	TTC26	7			0	1.556	0.01	0.01		0.01	0.521698	3.81902e-16	3.26911e-16		3.35161e-16	92.68					135.5	264.5				95.22
TRUE	High	Master Protein	O15446	DNA-directed RNA polymerase I subunit RPA34 OS=Homo sapiens OX=9606 GN=CD3EAP PE=1 SV=1	0	FALSE	16.391	12	3	6	3	1	510	55	8.51	10.06	3	metabolic process;regulation of biological process;response to stimulus	chromosome;cytosol;mitochondrion;nucleus	catalytic activity;RNA binding	Pf08208	10849	ENSG00000117877.10	CD3EAP	19			0	1.205	0.01	0.562	100	0.623	0.806077	3.81902e-16	0.286741	3.05343e-16	0.591853	49.1		21.4		22.89	101.2	183.2		115.6	22.09	43.39
TRUE	High	Master Protein	Q8IX90	Spindle and kinetochore-associated protein 3 OS=Homo sapiens OX=9606 GN=SKA3 PE=1 SV=2	0.002	FALSE	4.956	6	2	3	2	1	412	46.3	5.11	3.38	2	cell division;regulation of biological process	chromosome;cytoplasm;cytoskeleton	protein binding		221150	ENSG00000165480.15	SKA3	13			0	0.01	0.01	100	100	0.886	4.12715e-16	3.81902e-16	3.26911e-16	3.05343e-16	0.969017					20.58	212.1			187.9	24.63
TRUE	High	Master Protein	Q15542	Transcription initiation factor TFIID subunit 5 OS=Homo sapiens OX=9606 GN=TAF5 PE=1 SV=3	0	FALSE	11.965	6	2	2	2	1	800	86.8	5.64	7.97	2	cell organization and biogenesis;metabolic process;regulation of biological process	cytoskeleton;nucleus	catalytic activity;DNA binding;protein binding	Pf00400, Pf04494, Pf08662	6877	ENSG00000148835.10	TAF5	10	Basal transcription factors; Herpes simplex infection	Eukaryotic Transcription Initiation	0	2.508	0.01	0.398	100	0.998	0.00196719	3.81902e-16	0.0275327	3.05343e-16	0.985678	25.74		3.47		0	88.8	222.7		88.6		42.24
TRUE	High	Master Protein	Q9UPQ9	Trinucleotide repeat-containing gene 6B protein OS=Homo sapiens OX=9606 GN=TNRC6B PE=1 SV=4	0	FALSE	6.984	4	3	3	3	1	1833	193.9	6.76	2.09	3	regulation of biological process;response to stimulus	cytoplasm;cytosol	protein binding;RNA binding	Pf10427, Pf13893	23112	ENSG00000100354.20	TNRC6B	22			0	0.535	0.01	2.393	100	1.042	0.131079	3.81902e-16	0.176	3.05343e-16	0.995752	7.93		0		0	150	87.8		162.2	69.81	78.99
TRUE	High	Master Protein	Q2M389	WASH complex subunit 4 OS=Homo sapiens OX=9606 GN=WASHC4 PE=1 SV=2	0	FALSE	7.456	2	2	2	2	1	1173	136.3	7.44	5.48	2	cell organization and biogenesis;transport	endosome		Pf14744, Pf14745, Pf14746	23325	ENSG00000136051.13	KIAA1033; WASHC4	12	Endocytosis		0	1.07	0.01	0.988	100	0.904	0.964913	3.81902e-16	0.992195	3.05343e-16	0.954564	69.59		79.48		36.92	111.8	102.3		185.9	47.36	68.05
TRUE	High	Master Protein	Q9NZJ4	Sacsin OS=Homo sapiens OX=9606 GN=SACS PE=1 SV=2	0	FALSE	12.032	1	2	2	2	1	4579	520.8	7.05	5	2	metabolic process;regulation of biological process	cytoplasm;mitochondrion;nucleus	protein binding	Pf00240, Pf05168	26278	ENSG00000151835.14	SACS	13			0	1.071	0.01	0.01		0.01	0.972197	3.81902e-16	3.26911e-16		3.35161e-16	28.3					187.9	212.1			16.47	25.11
TRUE	High	Master Protein	Q8IY45	Protein AMN1 homolog OS=Homo sapiens OX=9606 GN=AMN1 PE=2 SV=4	0	FALSE	12.83	17	2	4	2	1	258	28.4	7.85	13.43	2			protein binding		196394	ENSG00000151743.10	AMN1	12			0	1.492	0.01	0.506	100	0.829	0.482878	3.81902e-16	0.313899	3.05343e-16	0.929578	55.71		12.96		34.9	123.2	183.8		93	49.75
TRUE	High	Master Protein	Q8WWV3	Reticulon-4-interacting protein 1, mitochondrial OS=Homo sapiens OX=9606 GN=RTN4IP1 PE=1 SV=2	0.005	FALSE	3.749	8	2	2	2	1	396	43.6	9.11	0	2	metabolic process;regulation of biological process	membrane;mitochondrion	catalytic activity;metal ion binding	Pf00107, Pf08240, Pf13602	84816	ENSG00000130347.12	RTN4IP1	6			0	1.364	0.01	0.01		0.01	0.724842	3.81902e-16	3.26911e-16		3.35161e-16	61.78					210.3	189.7			60.62	33.88
TRUE	High	Master Protein	Q16363	Laminin subunit alpha-4 OS=Homo sapiens OX=9606 GN=LAMA4 PE=1 SV=4	0	FALSE	10.282	2	2	2	2	1	1823	202.4	6.28	7.15	2	cell organization and biogenesis;regulation of biological process;transport	cytoskeleton;extracellular;membrane	catalytic activity;motor activity;protein binding;structural molecule activity	Pf00053, Pf00054, Pf00529, Pf01576, Pf02210, Pf03302, Pf05483, Pf06008, Pf06009, Pf06160, Pf07888, Pf10174, Pf12128, Pf13385, Pf13868, Pf14662	3910		LAMA4	6	Amoebiasis; Pathways in cancer; Toxoplasmosis; Focal adhesion; Small cell lung cancer; ECM-receptor interaction; African trypanosomiasis; PI3K-Akt signaling pathway	Focal Adhesion-PI3K-Akt-mTOR-signaling pathway; Focal Adhesion; miRNA targets in ECM and membrane receptors	0	1.793	0.01	1.47	100	4.266	0.288084	3.81902e-16	0.871862	3.05343e-16	0.00487226	0		75.98		0	60.9	102.4		236.8		9.01
TRUE	High	Master Protein	Q96K37	Solute carrier family 35 member E1 OS=Homo sapiens OX=9606 GN=SLC35E1 PE=1 SV=2	0	FALSE	17.231	6	2	6	2	1	410	44.7	9.79	20.97	2	transport	Golgi;membrane		Pf03151, Pf08449	79939	ENSG00000127526.14	SLC35E1	19			0	0.651	0.01	0.722	100	0.47	0.134836	3.81902e-16	0.662996	3.05343e-16	0.0572044	14.43		45.47		25.06	188.5	122.8		88.6	3.87	32.45
TRUE	High	Master Protein	Q9NYP9	Protein Mis18-alpha OS=Homo sapiens OX=9606 GN=MIS18A PE=1 SV=1	0	FALSE	7.157	19	2	3	2	1	233	25.8	5.2	3.29	2	cell division;cell organization and biogenesis;regulation of biological process	chromosome;cytosol;nucleus	metal ion binding;protein binding	Pf03226	54069	ENSG00000159055.3	MIS18A	21			0	1.181	0.01	0.402	100	0.53	0.876913	3.81902e-16	0.0681387	3.05343e-16	0.483677	25.47		2.82		0.67	140.4	185.1		74.5	19.86	16.51
TRUE	High	Master Protein	O75298	Reticulon-2 OS=Homo sapiens OX=9606 GN=RTN2 PE=1 SV=1	0.002	FALSE	4.973	5	2	2	2	1	545	59.2	5.31	4.54	2	regulation of biological process;transport	endoplasmic reticulum;membrane	protein binding	Pf02453	6253	ENSG00000125744.11	RTN2	19			0	1.724	0.01	2.767	100	4.77	0.300792	3.81902e-16	0.018734	3.05343e-16	0.000633126	42.64		48.97		20.58	53.4	92		254.6	19.44	44.35
TRUE	High	Master Protein	Q7L775	EPM2A-interacting protein 1 OS=Homo sapiens OX=9606 GN=EPM2AIP1 PE=1 SV=1	0.002	FALSE	4.682	5	2	3	2	1	607	70.3	6.11	1.83	2	regulation of biological process;response to stimulus	cytoplasm;endoplasmic reticulum;nucleus	DNA binding;protein binding		9852	ENSG00000178567.7	EPM2AIP1	3			0	1.611	0.01	0.01		0.01	0.450737	3.81902e-16	3.26911e-16		3.35161e-16	22.27					153.2	246.8			4.92	21.74
[truncated: 15 more columns]
