# Supplementary material for: Mutant KRAS-Associated Proteome Is Mainly Controlled by Exogenous Factors
Source: Cells. 2022 Jun 21;11(13):1988. doi: 10.3390/cells11131988 (PMC9265670; doi:10.3390/cells11131988)
Supplement: Supplementary file 1 [file cells-11-01988-s001.zip › Supplementary file S7_LS174T_siKRAS_FibCM_vs_siCTRL_FibCM.xlsx]

## Sheet: Folha1
Checked	Protein FDR Confidence: Combined	Master	Accession	Description	Exp. q-value: Combined	Contaminant	Sum PEP Score	Coverage [%]	# Peptides	# PSMs	# Unique Peptides	# Protein Groups	# AAs	MW [kDa]	calc. pI	Score Sequest HT: Sequest HT	# Peptides (by Search Engine): Sequest HT	Biological Process	Cellular Component	Molecular Function	Pfam IDs	Entrez Gene ID	Ensembl Gene ID	Gene Symbol	Chromosome	KEGG Pathways	WikiPathways	# Razor Peptides	Abundance Ratio: (6_LS174T_siCTRL_FibCM) / (5_LS174T_siCTRL_ctrlCM)	Abundance Ratio: (7_LS174T_siKRAS_ctrlCM) / (5_LS174T_siCTRL_ctrlCM)	Abundance Ratio: (8_LS174T_siKRAS_FibCM) / (6_LS174T_siCTRL_FibCM)	Abundance Ratio: (8_LS174T_siKRAS_FibCM) / (7_LS174T_siKRAS_ctrlCM)	Abundance Ratio: (8_LS174T_siKRAS_FibCM) / (5_LS174T_siCTRL_ctrlCM)	Abundance Ratio Adj. P-Value: (6_LS174T_siCTRL_FibCM) / (5_LS174T_siCTRL_ctrlCM)	Abundance Ratio Adj. P-Value: (7_LS174T_siKRAS_ctrlCM) / (5_LS174T_siCTRL_ctrlCM)	Abundance Ratio Adj. P-Value: (8_LS174T_siKRAS_FibCM) / (6_LS174T_siCTRL_FibCM)	Abundance Ratio Adj. P-Value: (8_LS174T_siKRAS_FibCM) / (7_LS174T_siKRAS_ctrlCM)	Abundance Ratio Adj. P-Value: (8_LS174T_siKRAS_FibCM) / (5_LS174T_siCTRL_ctrlCM)	Abundance Ratio Variability [%]: (6_LS174T_siCTRL_FibCM) / (5_LS174T_siCTRL_ctrlCM)	Abundance Ratio Variability [%]: (7_LS174T_siKRAS_ctrlCM) / (5_LS174T_siCTRL_ctrlCM)	Abundance Ratio Variability [%]: (8_LS174T_siKRAS_FibCM) / (6_LS174T_siCTRL_FibCM)	Abundance Ratio Variability [%]: (8_LS174T_siKRAS_FibCM) / (7_LS174T_siKRAS_ctrlCM)	Abundance Ratio Variability [%]: (8_LS174T_siKRAS_FibCM) / (5_LS174T_siCTRL_ctrlCM)	Abundances (Grouped): 5_LS174T_siCTRL_ctrlCM	Abundances (Grouped): 6_LS174T_siCTRL_FibCM	Abundances (Grouped): 7_LS174T_siKRAS_ctrlCM	Abundances (Grouped): 8_LS174T_siKRAS_FibCM	Abundances (Grouped) CV [%]: 5_LS174T_siCTRL_ctrlCM	Abundances (Grouped) CV [%]: 6_LS174T_siCTRL_FibCM
TRUE	High	Master Protein	P07998	Ribonuclease pancreatic OS=Homo sapiens OX=9606 GN=RNASE1 PE=1 SV=4	0.001	FALSE	6.941	30	2	4	2	1	156	17.6	8.79	8.16	2	defense response;metabolic process;response to stimulus	extracellular	catalytic activity;protein binding	Pf00074	6035	ENSG00000129538.13	RNASE1	14			0	0.01	2.575	100	0.55	1.159	4.49643e-16	7.05753e-05	4.24865e-16	0.000227355	0.924358		0		9	0	89.8		200.2	110
TRUE	High	Master Protein	Q14202	Zinc finger MYM-type protein 3 OS=Homo sapiens OX=9606 GN=ZMYM3 PE=1 SV=2	0	FALSE	18.243	6	3	4	3	1	1370	152.3	6.35	8.35	3	cell organization and biogenesis;development;regulation of biological process	cytoplasm;nucleus	DNA binding;metal ion binding	Pf06467, Pf12012, Pf12526	9203	ENSG00000147130.14	ZMYM3	X			0		100	100	0.639	100		3.59486e-16	4.24865e-16	0.238329	3.9087e-16				20.95				272.7	127.3
TRUE	High	Master Protein	P83111	Serine beta-lactamase-like protein LACTB, mitochondrial OS=Homo sapiens OX=9606 GN=LACTB PE=1 SV=2	0.001	FALSE	6.435	5	2	5	2	1	547	60.7	8.53	10.09	2	metabolic process;regulation of biological process	cytosol;mitochondrion	catalytic activity;protein binding	Pf00144	114294	ENSG00000103642.11	LACTB	15			0	0.01	1.958	100	0.722	1.506	4.49643e-16	0.0790138	4.24865e-16	0.390901	0.538466		20.38		20.41	38.54	87.1		181.7	131.2	9.23
TRUE	High	Master Protein	O60291	E3 ubiquitin-protein ligase MGRN1 OS=Homo sapiens OX=9606 GN=MGRN1 PE=1 SV=2	0.001	FALSE	5.903	10	2	3	2	1	552	60.7	5.15	3.05	2	metabolic process;regulation of biological process;transport	cytoplasm;cytosol;endosome;membrane;nucleus	catalytic activity;metal ion binding;protein binding	Pf00097, Pf13639, Pf13920, Pf13923, Pf14634	23295	ENSG00000102858.12	MGRN1	16	Ubiquitin mediated proteolysis		0	0.01	1.336	100	0.81	1.082	4.49643e-16	0.80497	4.24865e-16	0.687491	0.992073		78.35		54.5	52.39	118.8		152.6	128.6	70.68
TRUE	High	Master Protein	Q9NZC3	Glycerophosphodiester phosphodiesterase 1 OS=Homo sapiens OX=9606 GN=GDE1 PE=1 SV=1	0.001	FALSE	6.722	11	2	2	2	1	331	37.7	6.71	2.52	2	metabolic process	membrane	catalytic activity;metal ion binding	Pf03009	51573	ENSG00000006007.11	GDE1	16			0	0.01	2.368	100	0.29	0.666	4.49643e-16	0.0340331	4.24865e-16	6.10151e-10	0.448035		79.66		4.24	49.9	49.1		163.9	187	85.41
TRUE	High	Master Protein	Q92817	Envoplakin OS=Homo sapiens OX=9606 GN=EVPL PE=1 SV=3	0	FALSE	9.575	3	4	4	4	1	2033	231.5	6.96	4.17	4	cell death;cell differentiation;metabolic process	cytoplasm;cytoskeleton;cytosol	protein binding;structural molecule activity	Pf00681, Pf05667	2125	ENSG00000167880.7	EVPL	17			0	0.01	0.88	100	0.503	0.423	4.49643e-16	0.85145	4.24865e-16	0.000504648	3.94286e-06		19.94		48.77	28.12	172.2		151.5	76.2	21
TRUE	High	Master Protein	Q9H9H4	Vacuolar protein sorting-associated protein 37B OS=Homo sapiens OX=9606 GN=VPS37B PE=1 SV=1	0	FALSE	15.312	24	3	7	3	1	285	31.3	7.34	18.64	3	cell communication;cell organization and biogenesis;metabolic process;regulation of biological process;response to stimulus;transport	cytoplasm;endosome;membrane	protein binding	Pf07200	79720	ENSG00000139722.6	VPS37B	12	Endocytosis		0	0.01	2.752	100	0.752	2.072	4.49643e-16	0.000584035	4.24865e-16	0.469439	0.0338405		43.21		12.54	44.01	72.4		199.2	128.5	46.29
TRUE	High	Master Protein	Q9Y448	Small kinetochore-associated protein OS=Homo sapiens OX=9606 GN=KNSTRN PE=1 SV=2	0	FALSE	10.191	9	2	2	2	1	316	35.4	6.3	5.82	2	cell division;cell organization and biogenesis;regulation of biological process	chromosome;cytoplasm;cytoskeleton;cytosol;nucleus	protein binding		90417	ENSG00000128944.13	C15orf23; KNSTRN	15			0	0.126	0.366	7.816	2.697	0.987	4.49643e-16	0.0221464	1.92144e-10	0.00111331	0.992073	0.69	9.43	61.11	107.96	20.29	161.3	20.4	59	159.3	17.35	133.33
TRUE	High	Master Protein	P35527	Keratin, type I cytoskeletal 9 OS=Homo sapiens OX=9606 GN=KRT9 PE=1 SV=3	0	FALSE	93.941	33	12	20	11	1	623	62	5.24	53.06	12	cell death;cell organization and biogenesis	cytosol;membrane;nucleus	structural molecule activity	Pf00038, Pf13166	3857	ENSG00000171403.9	KRT9	17			0	0.662	1.088	5.553	2.149	1.683	0.277191	0.976226	4.24865e-16	3.80873e-14	0.000258189	40.62	111.03	62.95	93.47	106.44	48.2	39.2	77.2	235.4	116.35	56.7
TRUE	High	Master Protein	P04264	Keratin, type II cytoskeletal 1 OS=Homo sapiens OX=9606 GN=KRT1 PE=1 SV=6	0	FALSE	136.453	39	21	70	17	1	644	66	8.12	158.43	21	cell death;defense response;metabolic process;regulation of biological process;response to stimulus;transport	cytoskeleton;cytosol;extracellular;membrane;nucleus	catalytic activity;motor activity;protein binding;receptor activity;structural molecule activity	Pf00038, Pf01576, Pf05103, Pf05957, Pf12128, Pf13166, Pf13514	3848	ENSG00000167768.4	KRT1	12		Corticotropin-releasing hormone signaling pathway	1	0.512	1.083	4.882	2.956	2.423	1.46873e-10	0.953754	4.24865e-16	3.54689e-16	3.9087e-16	21.75	86.01	114.19	115.85	101	127.8	33.2	79.3	159.7	45.96	51.77
TRUE	High	Master Protein	P09486	SPARC OS=Homo sapiens OX=9606 GN=SPARC PE=1 SV=1	0	FALSE	13.202	10	2	3	2	1	303	34.6	4.84	10.24	2	cell organization and biogenesis;regulation of biological process;response to stimulus;transport	cell surface;cytoplasm;extracellular;membrane;mitochondrion;nucleus;organelle lumen	metal ion binding;protein binding	Pf00050, Pf07648, Pf09289, Pf10591	6678	ENSG00000113140.10	SPARC	5		Senescence and Autophagy in Cancer; miR-509-3p alteration of YAP1/ECM axis	0	100		3.821	100	100	4.49643e-16		2.79243e-14	3.54689e-16	3.9087e-16			0				59		341
TRUE	High	Master Protein	Q02818	Nucleobindin-1 OS=Homo sapiens OX=9606 GN=NUCB1 PE=1 SV=4	0	FALSE	58.268	24	8	15	8	1	461	53.8	5.25	57.41	8	metabolic process;regulation of biological process;response to stimulus	cytoplasm;endoplasmic reticulum;endosome;extracellular;Golgi;membrane;nucleus;organelle lumen	DNA binding;metal ion binding;protein binding		4924	ENSG00000104805.15	NUCB1	19			0	0.856	1.89	3.719	1.86	3.352	0.953859	0.11977	2.73371e-10	3.89681e-05	2.17983e-10	21.12	62.88	112.74	106.2	135.36	19.2	27.7	151.7	201.4	137.81	136.38
TRUE	High	Master Protein	Q01524	Defensin-6 OS=Homo sapiens OX=9606 GN=DEFA6 PE=1 SV=1	0	FALSE	28.079	40	2	8	2	1	100	11	5.38	30.78	2	defense response;response to stimulus	extracellular;organelle lumen	protein binding	Pf00323, Pf00879, Pf13841	1671	ENSG00000164822.4	DEFA6	8			0	0.811	2.409	3.617	1.091	2.713	0.781856	4.6805e-09	4.24865e-16	0.730623	3.9087e-16	32.58	33.35	61.49	32.06	43.16	66.6	33.8	146.6	153	62	75.83
TRUE	High	Master Protein	Q7Z5G4	Golgin subfamily A member 7 OS=Homo sapiens OX=9606 GN=GOLGA7 PE=1 SV=2	0	FALSE	8.47	19	2	4	2	1	137	15.8	7.05	6.66	2	cell organization and biogenesis;metabolic process;regulation of biological process;transport	extracellular;Golgi;membrane	catalytic activity;protein binding	Pf10256	51125	ENSG00000147533.16	GOLGA7	8			0	0.429	0.411	3.335	3.476	1.43	0.00885452	0.00981538	2.27182e-05	1.79656e-08	0.579451	2.92	8.09	15.22	51.89	17.04	122.3	52.5	50.3	174.9	16.74	14.97
TRUE	High	Master Protein	O95208	Epsin-2 OS=Homo sapiens OX=9606 GN=EPN2 PE=1 SV=3	0	FALSE	8.011	3	2	5	2	1	641	68.4	7.52	12.47	2	cell organization and biogenesis;transport	cytoplasm;cytosol	protein binding	Pf01417, Pf07651	22905	ENSG00000072134.15	EPN2	17	Endocytosis		0	0.448	0.695	3.155	0.933	1.318	0.0111396	0.618384	1.34579e-06	0.935664	0.69787	5.98	18.92	55.79	90.16	53.34	102	85.5	66.4	146.1	85.12	97.73
TRUE	High	Master Protein	Q96RU3	Formin-binding protein 1 OS=Homo sapiens OX=9606 GN=FNBP1 PE=1 SV=2	0	FALSE	10.128	7	3	4	3	1	617	71.3	5.72	4.08	3	cell organization and biogenesis;transport	cytoplasm;cytoskeleton;cytosol;membrane;vacuole	protein binding	Pf00018, Pf00611, Pf07653, Pf08239, Pf13654, Pf14604	23048	ENSG00000187239.16	FNBP1	9			0	0.38	1.132	3.128	1.044	1.188	0.00127951	0.953754	0.000150261	0.970307	0.941599	0.39	23.91	13.79	20	13.54	108.1	41.1	122.4	128.4	2.61
TRUE	High	Master Protein	P19256	Lymphocyte function-associated antigen 3 OS=Homo sapiens OX=9606 GN=CD58 PE=1 SV=1	0.001	FALSE	6.843	10	2	3	2	1	250	28.1	6.76	3.62	2	cellular component movement;regulation of biological process;response to stimulus;transport	cell surface;membrane	protein binding		965	ENSG00000116815.15	CD58	1	Epstein-Barr virus infection; Cell adhesion molecules (CAMs)		0	0.321	1.012	2.832	0.882	0.911	0.000816992	0.997752	0.0314509	0.949883	0.968988	0	21.25	41.1	31.34	34.08	123.3	39.6	124.8	112.3
TRUE	High	Master Protein	Q8NBI6	Xyloside xylosyltransferase 1 OS=Homo sapiens OX=9606 GN=XXYLT1 PE=1 SV=1	0.001	FALSE	6.588	5	2	2	2	1	393	43.8	8.13	4.63	2	metabolic process	endoplasmic reticulum;membrane	catalytic activity;metal ion binding	Pf01501	152002	ENSG00000173950.15	XXYLT1	3			0	0.94	1.822	2.822	0.982	2.026	0.999984	0.271228	0.00048006	0.982583	0.0520094	103.01	94.36	98.59	50.82	88.06	58.1	41.7	126.8	173.4	116.73	120.18
TRUE	High	Master Protein	Q9P0M9	39S ribosomal protein L27, mitochondrial OS=Homo sapiens OX=9606 GN=MRPL27 PE=1 SV=1	0	FALSE	25.736	28	3	10	3	1	148	16.1	10.42	26.74	3	cell organization and biogenesis;metabolic process	membrane;mitochondrion;ribosome	protein binding;RNA binding;structural molecule activity	Pf01016	51264	ENSG00000108826.15	MRPL27	17	Ribosome		0	0.397	1.169	2.735	0.894	1.07	6.26862e-08	0.896823	3.72277e-07	0.808111	0.992073	17.67	16.51	90.85	21.63	15.66	131.9	42.2	110.5	115.4	34.59	81.02
TRUE	High	Master Protein	O75795	UDP-glucuronosyltransferase 2B17 OS=Homo sapiens OX=9606 GN=UGT2B17 PE=1 SV=1	0	FALSE	27.718	14	7	23	7	1	530	61.1	8.54	52.61	7	metabolic process	endoplasmic reticulum;membrane	catalytic activity	Pf00201, Pf04101	7367	ENSG00000197888.2	UGT2B17	4	Ascorbate and aldarate metabolism; Metabolism of xenobiotics by cytochrome P450; Porphyrin and chlorophyll metabolism; Retinol metabolism; Drug metabolism - cytochrome P450; Chemical carcinogenesis; Pentose and glucuronate interconversions; Metabolic pathways; Drug metabolism - other enzymes; Steroid hormone biosynthesis	Metapathway biotransformation; Glucuronidation	0	0.995	2.467	2.484	1.09	2.804	0.972692	6.5552e-13	4.24865e-16	0.728427	3.9087e-16	70.16	61.8	64	31.11	57.07	52.3	60.1	137	150.6	50.45	50.69
TRUE	High	Master Protein	Q13610	Periodic tryptophan protein 1 homolog OS=Homo sapiens OX=9606 GN=PWP1 PE=1 SV=1	0	FALSE	17.401	12	3	9	3	1	501	55.8	4.77	31.6	3	cell organization and biogenesis;metabolic process;regulation of biological process	Golgi;nucleus	protein binding	Pf00400	11137	ENSG00000136045.11	PWP1	12			0	0.398	0.856	2.411	1.323	1.133	4.39789e-11	0.672468	6.19309e-07	0.0919065	0.874045	12.28	6.95	62.97	27.15	30.52	137.6	35.9	120.1	106.3	0.16	68.79
TRUE	High	Master Protein	Q6Y288	Beta-1,3-glucosyltransferase OS=Homo sapiens OX=9606 GN=B3GLCT PE=1 SV=2	0	FALSE	13.582	8	2	5	2	1	498	56.5	7.5	14.62	2	metabolic process	endoplasmic reticulum;membrane	catalytic activity	Pf02434	145173	ENSG00000187676.7	B3GALTL; B3GLCT	13	Other types of O-glycan biosynthesis		0	1.12	2.25	2.311	1.617	3.288	0.840569	0.00460858	4.32185e-05	0.000931864	2.39778e-13	82.3	106.5	88.77	45.57	90.42	81.6	83.6	78.9	156	66.51	59.12
TRUE	High	Master Protein	Q13470	Non-receptor tyrosine-protein kinase TNK1 OS=Homo sapiens OX=9606 GN=TNK1 PE=1 SV=3	0	FALSE	8.746	6	2	2	2	1	666	72.4	9.48	6.85	2	cell differentiation;cellular component movement;defense response;metabolic process;regulation of biological process;response to stimulus	cytoplasm;cytosol;membrane	catalytic activity;nucleotide binding;protein binding;signal transducer activity	Pf00069, Pf07714	8711	ENSG00000174292.12; ENSG00000283781.1	TNK1	17; CHR_HG2046_PATCH		Focal Adhesion	0	0.558	0.756	2.263	1.67	1.118	0.0827952	0.560617	0.0647094	0.0692316	0.961714	19.52	51.49	56.03	66.62	136.54	209.9	18.7	105	66.4	97.43	118.93
TRUE	High	Master Protein	Q99828	Calcium and integrin-binding protein 1 OS=Homo sapiens OX=9606 GN=CIB1 PE=1 SV=4	0	FALSE	9.471	14	2	6	2	1	191	21.7	4.78	7.08	2	cell death;cell differentiation;cell division;cell organization and biogenesis;metabolic process;regulation of biological process;response to stimulus	cytoplasm;cytoskeleton;endoplasmic reticulum;Golgi;membrane;nucleus	enzyme regulator activity;metal ion binding;protein binding	Pf13499, Pf13833	10519	ENSG00000185043.10	CIB1	15			0	0.91	0.997	2.202	2.025	2.003	0.987056	0.996682	0.0584183	0.0275139	0.0812145	55.77	48.93	58.85	38.11	22.21	81.5	74.1	81.3	163.2	2.21	59.3
TRUE	High	Master Protein	P01024	Complement C3 OS=Homo sapiens OX=9606 GN=C3 PE=1 SV=2	0	FALSE	14.585	2	2	8	2	1	1663	187	6.4	21.34	2	cell organization and biogenesis;defense response;metabolic process;regulation of biological process;response to stimulus;transport	extracellular;membrane;organelle lumen	catalytic activity;enzyme regulator activity;protein binding	Pf00207, Pf01759, Pf01821, Pf01835, Pf07677, Pf07678, Pf07703, Pf10569, Pf11974	718	ENSG00000125730.16	C3	19	Viral carcinogenesis; Chagas disease (American trypanosomiasis); Leishmaniasis; Tuberculosis; Pertussis; Phagosome; Complement and coagulation cascades; Systemic lupus erythematosus; Herpes simplex infection; Staphylococcus aureus infection; Legionellosis	Allograft Rejection; Complement Activation; TYROBP Causal Network; Complement and Coagulation Cascades	0	0.869	1.811	2.187	1.079	2.227	0.901758	0.00229102	1.78692e-05	0.867334	6.78152e-08	68.92	104.07	107.3	83.37	89.18	60.8	54.4	139.2	145.5	8.32	56.32
TRUE	High	Master Protein	Q6UX06	Olfactomedin-4 OS=Homo sapiens OX=9606 GN=OLFM4 PE=1 SV=1	0	FALSE	100.59	39	14	59	14	1	510	57.2	5.69	189.88	14	cell organization and biogenesis;regulation of biological process;transport	extracellular;membrane;mitochondrion;organelle lumen;vacuole	catalytic activity;protein binding	Pf02191	10562	ENSG00000102837.6	OLFM4	13			0	0.777	1.56	2.153	0.963	1.691	0.088988	0.000860731	3.69859e-14	0.910711	1.19785e-09	40.43	78.54	69.76	61.23	77.47	79.2	62.9	132.1	125.8	83.48	70.12
TRUE	High	Master Protein	Q86X10	Ral GTPase-activating protein subunit beta OS=Homo sapiens OX=9606 GN=RALGAPB PE=1 SV=1	0	FALSE	16.182	5	3	6	3	1	1494	166.7	6.79	14.12	3	regulation of biological process		enzyme regulator activity;protein binding	Pf02145	57148	ENSG00000170471.14	RALGAPB	20			0	0.733	1.428	2.148	1.137	1.411	0.732997	0.641793	0.00109606	0.793541	0.381261	18.29	25.05	70.1	49.52	58.26	52.6	93.1	111.8	142.6	47.36	72.37
TRUE	High	Master Protein	P46100	Transcriptional regulator ATRX OS=Homo sapiens OX=9606 GN=ATRX PE=1 SV=5	0	FALSE	20.38	2	3	6	3	1	2492	282.4	6.58	14.84	3	cell organization and biogenesis;metabolic process;regulation of biological process;response to stimulus	chromosome;nucleus	catalytic activity;DNA binding;metal ion binding;nucleotide binding;protein binding	Pf00176, Pf00271	546		ATRX	X		Pathways Affected in Adenoid Cystic Carcinoma	0	0.775	0.968	2.128	1.939	1.941	0.857913	0.989567	0.0454571	0.0202047	0.0736994	44.62	63.9	34.52	75.41	47.35	59.3	73.9	101.8	165.1	58.66	74.82
TRUE	High	Master Protein	Q68DH5	LMBR1 domain-containing protein 2 OS=Homo sapiens OX=9606 GN=LMBRD2 PE=1 SV=1	0	FALSE	12.189	6	2	5	2	1	695	81.1	7.5	18.11	2		membrane		Pf04791	92255	ENSG00000164187.6	LMBRD2	5			0	0.616	0.683	2.109	1.103	1.224	0.385588	0.577417	0.0471907	0.927316	0.912123	32.89	55.06	77.81	65.58	72.96	95.6	59.9	118.2	126.4	83.77	88.93
TRUE	High	Master Protein	P02774	Vitamin D-binding protein OS=Homo sapiens OX=9606 GN=GC PE=1 SV=2	0	FALSE	11.386	8	2	4	2	1	474	52.9	5.45	13.68	2											0	0.596	1.023	2.088	1.217	1.245	0.0163593	0.999797	0.000496115	0.45881	0.619116	0	11.44	0	11.44	0	103.5	61.7	105.9	128.9
TRUE	High	Master Protein	Q13561	Dynactin subunit 2 OS=Homo sapiens OX=9606 GN=DCTN2 PE=1 SV=4	0	FALSE	110.615	48	11	49	11	1	401	44.2	5.21	179.57	11	cell organization and biogenesis;cell proliferation;regulation of biological process;transport	chromosome;cytoplasm;cytoskeleton;cytosol;membrane	catalytic activity;motor activity;protein binding	Pf04912	10540	ENSG00000175203.15	DCTN2	12	Huntington's disease; Vasopressin-regulated water reabsorption		0	0.986	1.696	2.024	1.251	1.845	0.97502	0.000240093	1.13365e-09	0.0302194	3.66562e-08	38.76	61.49	72.11	57.25	68.28	75.6	71.4	121.3	131.7	31.79	19.86
TRUE	High	Master Protein	P03905	NADH-ubiquinone oxidoreductase chain 4 OS=Homo sapiens OX=9606 GN=MT-ND4 PE=1 SV=1	0	FALSE	18.224	12	3	9	3	1	459	51.5	9.35	20.24	3	cell organization and biogenesis;metabolic process;response to stimulus;transport	membrane;mitochondrion	catalytic activity	Pf00361	4538	ENSG00000198886.2	ND4	MT	Parkinson's disease; Oxidative phosphorylation; Metabolic pathways	Electron Transport Chain; Oxidative phosphorylation	0	0.645	1.028	2.001	1.504	1.193	0.372997	0.998022	0.0213905	0.195647	0.928597	35.31	62.08	92.49	84.46	76.4	74.5	104.1	109.8	111.7	60.52	55.53
TRUE	High	Master Protein	Q7Z4H8	Protein O-glucosyltransferase 3 OS=Homo sapiens OX=9606 GN=KDELC2 PE=1 SV=2	0	FALSE	14.719	10	3	4	3	1	507	58.5	8.24	12.99	3	metabolic process	endoplasmic reticulum;organelle lumen	catalytic activity;protein binding	Pf00630, Pf05686, Pf13524	143888	ENSG00000178202.12	KDELC2	11			0	1.244	2.169	0.498	1.046	1.346	0.382601	0.0136808	1.83022e-06	0.955031	0.520017	52.56	54.19	31.04	64.36	135.87	63.8	163.3	82	90.9	103.87	56.83
TRUE	High	Master Protein	Q9BQG2	Peroxisomal NADH pyrophosphatase NUDT12 OS=Homo sapiens OX=9606 GN=NUDT12 PE=1 SV=1	0	FALSE	18.118	15	4	5	4	1	462	52	6.83	7.16	4	metabolic process	cytoplasm;nucleus;organelle lumen	catalytic activity;metal ion binding;protein binding	Pf00023, Pf00293, Pf09297, Pf12796, Pf13606, Pf13637, Pf13857	83594	ENSG00000112874.9	NUDT12	5	Peroxisome; Nicotinate and nicotinamide metabolism; Metabolic pathways		0	1.017	1.083	0.483	0.552	0.711	0.976075	0.976226	0.00793498	0.0848394	0.515049	54.76	51.78	13.15	19.14	31.66	91.9	91.9	78.2	138	33.39	48.23
TRUE	High	Master Protein	P78362	SRSF protein kinase 2 OS=Homo sapiens OX=9606 GN=SRPK2 PE=1 SV=3	0	FALSE	17.191	14	6	13	4	1	688	77.5	4.97	11.62	6	cell differentiation;cell organization and biogenesis;defense response;metabolic process;regulation of biological process;response to stimulus	cytoplasm;cytosol;nucleus	catalytic activity;metal ion binding;nucleotide binding;protein binding;RNA binding	Pf00069, Pf07714	6733	ENSG00000135250.16	SRPK2	7		mRNA Processing	0	0.303	0.208	0.445	1.043	0.649	1.1744e-05	2.54809e-06	0.0108632	0.969854	0.3906	4.39	0	24.15	46.42	22.34	105.5	89.6	94.3	110.5	83.29	100
TRUE	High	Master Protein	Q9Y6W3	Calpain-7 OS=Homo sapiens OX=9606 GN=CAPN7 PE=1 SV=1	0	FALSE	14.848	7	4	5	4	1	813	92.6	7.65	7.45	4	metabolic process;regulation of biological process	cytoplasm;cytosol;nucleus	catalytic activity;protein binding	Pf00648, Pf01067, Pf04212	23473	ENSG00000131375.9	CAPN7	3		Integrin-mediated Cell Adhesion	0	1.203	0.769	0.414	1.519	0.429	0.606045	0.594768	1.74257e-06	0.179613	4.43071e-06	24.7	31.69	7.25	10.84	1.99	141.6	111.9	87.8	58.7		63.26
TRUE	High	Master Protein	Q9BUF5	Tubulin beta-6 chain OS=Homo sapiens OX=9606 GN=TUBB6 PE=1 SV=1	0	FALSE	177.639	36	13	1271	3	1	446	49.8	4.88	4016.85	13	cell organization and biogenesis	cytoplasm;cytoskeleton;nucleus	catalytic activity;nucleotide binding;structural molecule activity	Pf00091, Pf03953, Pf10644	84617	ENSG00000176014.12	TUBB6	18	Pathogenic Escherichia coli infection; Gap junction; Phagosome	Parkin-Ubiquitin Proteasomal System pathway; Pathogenic Escherichia coli infection	0	1.363	0.634	0.407	0.874	0.727	0.109343	0.116535	9.38867e-08	0.865976	0.189222	112.65	22.81	17.31	35.9	37.96	112.6	153.5	71.4	62.4	59.58	93.6
TRUE	High	Master Protein	Q15057	Arf-GAP with coiled-coil, ANK repeat and PH domain-containing protein 2 OS=Homo sapiens OX=9606 GN=ACAP2 PE=1 SV=3	0	FALSE	9.864	5	3	5	3	1	778	88	6.8	9.64	3	regulation of biological process;response to stimulus	endosome;membrane	enzyme regulator activity;metal ion binding;protein binding	Pf00023, Pf00169, Pf01412, Pf12796, Pf13637, Pf13857, Pf15413	23527	ENSG00000114331.13	ACAP2	3	Endocytosis		0	1.555	1.648	0.381	1.063	1.086	0.232759	0.271228	0.000848403	0.955157	0.992073	102.84	104.27	33.01	43.56	70.29	128.1	102	131	38.9	58.33	8.06
TRUE	High	Master Protein	O75794	Cell division cycle protein 123 homolog OS=Homo sapiens OX=9606 GN=CDC123 PE=1 SV=1	0	FALSE	27.712	18	4	5	4	1	336	39.1	4.81	16.43	4	cell division;regulation of biological process	cytoplasm		Pf07065	8872	ENSG00000151465.13	CDC123	10			0	0.977	0.778	0.372	0.836	0.821	0.991281	0.754316	6.75759e-07	0.771616	0.783864	42.98	22.3	5.32	38.98	33.61	121	130.7	92.5	55.8	43.21	89.36
TRUE	High	Master Protein	Q96PV6	Leukocyte receptor cluster member 8 OS=Homo sapiens OX=9606 GN=LENG8 PE=1 SV=3	0	FALSE	18.434	8	2	3	2	1	800	88.1	9.11	13.57	2											0	0.925	0.791	0.358	0.794	0.447	0.987056	0.83805	2.20254e-07	0.60759	0.000819885	34.8	53.83	8.98	60.44	22.43	82.3	97.6	95.5	124.5	56.02	56.78
TRUE	High	Master Protein	P50613	Cyclin-dependent kinase 7 OS=Homo sapiens OX=9606 GN=CDK7 PE=1 SV=1	0.001	FALSE	7.197	12	2	4	2	1	346	39	8.47	2.6	2	cell division;cell organization and biogenesis;cell proliferation;metabolic process;regulation of biological process;response to stimulus	cytoplasm;nucleus	catalytic activity;nucleotide binding;protein binding	Pf00069, Pf07714, Pf14531	1022	ENSG00000277273.5; ENSG00000134058.11	CDK7	5; CHR_HSCHR5_2_CTG1_1	Basal transcription factors; Nucleotide excision repair; Cell cycle	Integrated Breast Cancer Pathway; Eukaryotic Transcription Initiation; Cardiac Hypertrophic Response; MicroRNAs in cardiomyocyte hypertrophy; G1 to S cell cycle control	0	2.105	0.946	0.325	0.724	0.685	1.64215e-05	0.974896	8.17807e-10	0.470206	0.432731	0	0	0	0	0	77.1	197.2	72.9	52.8		27.11
TRUE	High	Master Protein	Q9GZY8	Mitochondrial fission factor OS=Homo sapiens OX=9606 GN=MFF PE=1 SV=1	0	FALSE	11.766	18	3	6	3	1	342	38.4	8.95	13.71	3	cell organization and biogenesis;regulation of biological process;transport	membrane;mitochondrion	protein binding	Pf05644	56947	ENSG00000168958.19	MFF	2			0	1.255	3.547	0.314	0.461	1.128	0.323498	4.52877e-09	6.29666e-13	0.000613024	0.961714	38.45	0	12.46	14.22	63.2	124	186.7	49.3	40.1	45.77	65.35
TRUE	High	Master Protein	O94851	[F-actin]-monooxygenase MICAL2 OS=Homo sapiens OX=9606 GN=MICAL2 PE=1 SV=1	0.003	FALSE	4.355	2	2	3	2	1	1124	126.6	8.65	5.3	2	cell organization and biogenesis;metabolic process;regulation of biological process	nucleus	catalytic activity;metal ion binding;nucleotide binding;protein binding	Pf00070, Pf00307, Pf00412, Pf00890, Pf01266, Pf01494, Pf01946, Pf03486, Pf07992, Pf11971, Pf12831, Pf13241, Pf13450	9645	ENSG00000133816.13	MICAL2	11			0	0.755	0.628	0.312	0.927	0.223	0.825835	0.575865	0.00072074	0.982583	1.18317e-05	27.67	26.99	15.66	0	7.38	131.7	110	144	14.3	22.61	8.44
TRUE	High	Master Protein	Q9BRX2	Protein pelota homolog OS=Homo sapiens OX=9606 GN=PELO PE=1 SV=2	0	FALSE	18.522	12	2	6	2	1	385	43.3	6.34	25.28	2	cell division;cell organization and biogenesis;cell proliferation;metabolic process;regulation of biological process	cytoplasm;nucleus	catalytic activity;metal ion binding;protein binding	Pf03463, Pf03464, Pf03465	53918	ENSG00000152684.10	PELO	5	mRNA surveillance pathway	Focal Adhesion; Focal Adhesion-PI3K-Akt-mTOR-signaling pathway	0	0.875	0.998	0.278	0.244	0.243	0.905313	0.9828	9.37058e-15	3.54689e-16	3.9087e-16	0	0	0	0	0	128.4	112.3	128.1	31.2
TRUE	High	Master Protein	Q08174	Protocadherin-1 OS=Homo sapiens OX=9606 GN=PCDH1 PE=1 SV=2	0	FALSE	18.897	6	4	7	4	1	1060	114.7	5.03	18.16	4	cell communication	membrane;nucleus	metal ion binding	Pf00028, Pf08266, Pf08374	5097	ENSG00000156453.13	PCDH1	5			0	0.975	0.327	0.25	0.818	0.283	0.993866	0.00305285	2.21777e-07	0.867334	1.36247e-06	26.19	27.98	14.65	3.49	23.14	130.9	116.9	28.2	124	70.22	95.07
TRUE	High	Master Protein	P0DPD7	EEF1A lysine methyltransferase 4 OS=Homo sapiens OX=9606 GN=EEF1AKMT4 PE=1 SV=1	0	FALSE	24.061	21	2	5	2	1	255	28.3	6.05	21.71	2											0	2.668	0.732	0.234	0.915	0.796	1.66962e-07	0.672468	1.39622e-12	0.935664	0.763883	85.31	28.64	1.53	56.93	20.37	106.7	154.3	72.4	66.6	37.33	103.65
TRUE	High	Master Protein	Q7L775	EPM2A-interacting protein 1 OS=Homo sapiens OX=9606 GN=EPM2AIP1 PE=1 SV=1	0	FALSE	22.823	8	3	7	3	1	607	70.3	6.11	16.22	3	regulation of biological process;response to stimulus	cytoplasm;endoplasmic reticulum;nucleus	DNA binding;protein binding		9852	ENSG00000178567.7	EPM2AIP1	3			0	0.783	1.212	0.234	0.923	0.417	0.404406	0.791803	4.24865e-16	0.844138	9.03072e-12	26.89	28.67	5.38	79.54	37.64	143.7	47.8	180.6	27.9	32.83	83.35
TRUE	High	Master Protein	Q15050	Ribosome biogenesis regulatory protein homolog OS=Homo sapiens OX=9606 GN=RRS1 PE=1 SV=2	0	FALSE	18.309	13	3	5	3	1	365	41.2	10.7	17.17	3	cell differentiation;cell organization and biogenesis;metabolic process;regulation of biological process;transport	chromosome;endoplasmic reticulum;nucleus	protein binding;RNA binding	Pf04939	23212	ENSG00000179041.3	RRS1	8			0	2.539	0.972	0.228	0.992	0.902	7.46311e-09	0.989686	4.24865e-16	0.99816	0.961714	106.83	95.44	2.5	50.59	44.46	63.2	249.5	39.7	47.6	101.61	3.16
TRUE	High	Master Protein	Q9Y580	RNA-binding protein 7 OS=Homo sapiens OX=9606 GN=RBM7 PE=1 SV=1	0	FALSE	14.132	14	3	4	3	1	266	30.5	9.57	9.23	3	regulation of biological process	nucleus	protein binding;RNA binding	Pf00076, Pf13893, Pf14259	10179	ENSG00000076053.10	RBM7	11			0	3.045	1.584	0.13	0.715	3.133	3.70929e-09	0.560979	4.24865e-16	0.735571	0.00015623	51.99	51.99	1.56	30.14	51.99	106.2	251.3	29.7	12.8	46.8	44.62
TRUE	High	Master Protein	Q2KHR3	Glutamine and serine-rich protein 1 OS=Homo sapiens OX=9606 GN=QSER1 PE=1 SV=3	0	FALSE	8.688	1	2	2	2	1	1735	189.9	7.08	3.74	2				Pf13926	79832	ENSG00000060749.14	QSER1	11			0	38.357	0.01	0.065	100	2.495	4.49643e-16	3.59486e-16	4.24865e-16	3.54689e-16	0.0466429	13.51		0.15		32.22	9.6	366.6		23.8	12.83
TRUE	High	Master Protein	Q96BY7	Autophagy-related protein 2 homolog B OS=Homo sapiens OX=9606 GN=ATG2B PE=1 SV=5	0.001	FALSE	6.669	2	2	2	2	1	2078	232.6	5.76	1.65	2	cell organization and biogenesis;metabolic process	membrane		Pf09333, Pf12624	55102	ENSG00000066739.11	ATG2B	14			0	0.754	1.026	0.01	0.01	0.01	0.582665	0.996682	4.24865e-16	3.54689e-16	3.9087e-16	0	22.08				143.9	108.5	147.6
TRUE	High	Master Protein	Q86VP3	Phosphofurin acidic cluster sorting protein 2 OS=Homo sapiens OX=9606 GN=PACS2 PE=1 SV=3	0.001	FALSE	7.335	3	2	3	2	1	889	97.6	6.6	3.11	2	cell death;cell organization and biogenesis	endoplasmic reticulum;mitochondrion	protein binding	Pf10254	23241	ENSG00000179364.13	PACS2	14			0	0.903	0.967	0.01	0.01	0.01	0.984931	0.98131	4.24865e-16	3.54689e-16	3.9087e-16	55.32	46.21				139.4	125.9	134.8		58.85
TRUE	High	Master Protein	O75648	Mitochondrial tRNA-specific 2-thiouridylase 1 OS=Homo sapiens OX=9606 GN=TRMU PE=1 SV=2	0	FALSE	11.736	10	2	4	2	1	421	47.7	8.03	13.57	2	cell organization and biogenesis;metabolic process	mitochondrion	catalytic activity;nucleotide binding;RNA binding	Pf00733, Pf02540, Pf02568, Pf03054	55687	ENSG00000100416.12	TRMU	22	Sulfur relay system		0	0.909	3.558	0.01	0.01	0.01	0.987056	2.94097e-08	4.24865e-16	3.54689e-16	3.9087e-16	71.27	45.28				70.5	78.8	250.8		75.99	68.19
TRUE	High	Master Protein	P05062	Fructose-bisphosphate aldolase B OS=Homo sapiens OX=9606 GN=ALDOB PE=1 SV=2	0	FALSE	29.154	20	6	18	5	1	364	39.4	7.87	43.04	6	cell organization and biogenesis;metabolic process;regulation of biological process	cytoplasm;cytoskeleton;cytosol	catalytic activity;protein binding	Pf00274	229	ENSG00000136872.17	ALDOB	9	Carbon metabolism; Fructose and mannose metabolism; Pentose phosphate pathway; Glycolysis / Gluconeogenesis; Biosynthesis of amino acids; Metabolic pathways	Glycolysis and Gluconeogenesis; Polyol Pathway	0	100	100	0.01	0.01		4.49643e-16	3.59486e-16	4.24865e-16	3.54689e-16								176.5	223.5
TRUE	High	Master Protein	Q9UDY4	DnaJ homolog subfamily B member 4 OS=Homo sapiens OX=9606 GN=DNAJB4 PE=1 SV=1	0	FALSE	16.72	10	3	16	2	1	337	37.8	8.5	49.46	3	metabolic process;regulation of biological process;response to stimulus	cytoplasm;cytosol;membrane	enzyme regulator activity;protein binding	Pf00226, Pf01556	11080	ENSG00000162616.8	DNAJB4	1			0	1.501	0.183	0.01	0.01	0.01	0.335348	1.98204e-06	4.24865e-16	3.54689e-16	3.9087e-16	0	0				149	223.7	27.2
TRUE	High	Master Protein	O14763	Tumor necrosis factor receptor superfamily member 10B OS=Homo sapiens OX=9606 GN=TNFRSF10B PE=1 SV=2	0.001	FALSE	6.05	7	2	2	2	1	440	47.8	5.55	3.76	2	cell death;cellular component movement;defense response;development;metabolic process;regulation of biological process;response to stimulus	cell surface;membrane	protein binding;receptor activity;signal transducer activity	Pf00020, Pf00531	8795	ENSG00000120889.12	TNFRSF10B	8	Cytokine-cytokine receptor interaction; Natural killer cell mediated cytotoxicity; Apoptosis; p53 signaling pathway; Measles; Influenza A	DNA Damage Response; Apoptosis; miRNA Regulation of DNA Damage Response; Apoptosis-related network due to altered Notch3 in ovarian cancer	0	2.24	15.227	0.01	0.01	0.01	3.18124e-06	3.59486e-16	4.24865e-16	3.54689e-16	3.9087e-16	30.88	30.88				21.7	48.5	329.8		28.84
TRUE	High	Master Protein	O00757	Fructose-1,6-bisphosphatase isozyme 2 OS=Homo sapiens OX=9606 GN=FBP2 PE=1 SV=2	0	FALSE	8.329	17	3	3	2	1	339	36.7	7.23	4.19	3	metabolic process	cytoplasm;cytosol;membrane;nucleus	catalytic activity;metal ion binding;protein binding	Pf00316, Pf00459	8789	ENSG00000130957.4	FBP2	9	Insulin signaling pathway; Carbon metabolism; Fructose and mannose metabolism; Pentose phosphate pathway; AMPK signaling pathway; Glycolysis / Gluconeogenesis; Metabolic pathways	Glycolysis and Gluconeogenesis	0	0.561	0.894	0.01	0.01	0.01	0.360425	0.957641	4.24865e-16	3.54689e-16	3.9087e-16	0	0				162.9	91.4	145.7
TRUE	High	Master Protein	Q9NVH0	Exonuclease 3'-5' domain-containing protein 2 OS=Homo sapiens OX=9606 GN=EXD2 PE=1 SV=2	0	FALSE	11.065	4	2	2	2	1	621	70.3	8.32	6.03	2	metabolic process;response to stimulus	cytoplasm;nucleus	catalytic activity;protein binding	Pf01612	55218	ENSG00000081177.18	EXD2	14			0	100		0.01			4.49643e-16		4.24865e-16									400
TRUE	High	Master Protein	O43353	Receptor-interacting serine/threonine-protein kinase 2 OS=Homo sapiens OX=9606 GN=RIPK2 PE=1 SV=2	0.001	FALSE	5.778	5	2	2	2	1	540	61.2	7.09	0	2	cell death;cell proliferation;defense response;metabolic process;regulation of biological process;response to stimulus	cytoplasm;cytoskeleton;cytosol	catalytic activity;nucleotide binding;protein binding;signal transducer activity	Pf00069, Pf00619, Pf07714	8767	ENSG00000104312.7	RIPK2	8	NOD-like receptor signaling pathway; Neurotrophin signaling pathway; Tuberculosis; Shigellosis	Fas Ligand (FasL) pathway and Stress induction of Heat Shock Proteins (HSP) regulation; Nucleotide-binding Oligomerization Domain (NOD) pathway; Apoptosis-related network due to altered Notch3 in ovarian cancer; T-Cell antigen Receptor (TCR) Signaling Pathway	0	0.707	0.85	0.01	0.01	0.01	0.701753	0.912437	4.24865e-16	3.54689e-16	3.9087e-16	0	0				156.4	110.6	133
TRUE	High	Master Protein	Q15223	Nectin-1 OS=Homo sapiens OX=9606 GN=NECTIN1 PE=1 SV=3	0	FALSE	10.286	7	2	3	2	1	517	57.1	6.1	8.35	2	cell organization and biogenesis;cellular component movement;regulation of biological process;response to stimulus;transport	extracellular;membrane	protein binding;receptor activity;signal transducer activity	Pf00047, Pf07679, Pf07686, Pf08205, Pf13895, Pf13927	5818	ENSG00000110400.10	PVRL1; NECTIN1	11	Cell adhesion molecules (CAMs); Adherens junction; Herpes simplex infection		0	0.714	0.876	0.01	0.01	0.01	0.440308	0.906212	4.24865e-16	3.54689e-16	3.9087e-16	0	0				154.5	110.2	135.3
TRUE	High	Master Protein	O43896	Kinesin-like protein KIF1C OS=Homo sapiens OX=9606 GN=KIF1C PE=1 SV=3	0	FALSE	24.535	5	5	10	2	1	1103	122.9	6.9	26.66	5	cellular component movement;transport	cytoplasm;cytoskeleton;endoplasmic reticulum;Golgi	catalytic activity;motor activity;nucleotide binding;protein binding;RNA binding	Pf00225, Pf00498	10749	ENSG00000129250.11	KIF1C	17			1	0.488	0.01	0.01		0.01	1.32855e-08	3.59486e-16	4.24865e-16		3.9087e-16	0					268.8	131.2
TRUE	High	Master Protein	Q2TAA5	GDP-Man:Man(3)GlcNAc(2)-PP-Dol alpha-1,2-mannosyltransferase OS=Homo sapiens OX=9606 GN=ALG11 PE=1 SV=2	0	FALSE	10.956	11	3	4	3	1	492	55.6	8.48	7.18	3	metabolic process	endoplasmic reticulum;membrane	catalytic activity	Pf00534, Pf13524, Pf13692	440138	ENSG00000253710.2	ALG11	13	N-Glycan biosynthesis; Metabolic pathways		0	0.763	0.726	0.01	0.01	0.01	0.816421	0.614191	4.24865e-16	3.54689e-16	3.9087e-16	6.45	19.75				160.7	122.6	116.7		10.54
TRUE	High	Master Protein	Q8IWA4	Mitofusin-1 OS=Homo sapiens OX=9606 GN=MFN1 PE=1 SV=3	0	FALSE	9.134	5	3	4	2	1	741	84.1	6.33	6.17	3	cell communication;cell organization and biogenesis;metabolic process;response to stimulus	membrane;mitochondrion	catalytic activity;nucleotide binding;protein binding	Pf00350, Pf01926, Pf04799	55669	ENSG00000171109.18	MFN1	3	NOD-like receptor signaling pathway		0	100	100	0.01	0.01		4.49643e-16	3.59486e-16	4.24865e-16	3.54689e-16								233.1	166.9			30.69
TRUE	High	Master Protein	Q9H501	ESF1 homolog OS=Homo sapiens OX=9606 GN=ESF1 PE=1 SV=1	0.006	FALSE	3.62	5	2	3	2	1	851	98.7	5.11	0	2	metabolic process;regulation of biological process	nucleus	RNA binding	Pf08159	51575	ENSG00000089048.14	ESF1	20			0	0.842	0.702	0.01	0.01	0.01	0.957458	0.784355	4.24865e-16	3.54689e-16	3.9087e-16	6.92	1.38				157.3	132.4	110.4		2.66	9.47
TRUE	High	Master Protein	A2VDF0	Fucose mutarotase OS=Homo sapiens OX=9606 GN=FUOM PE=1 SV=2	0	FALSE	12.463	26	2	2	2	1	154	16.8	5.58	6.72	2	metabolic process;regulation of biological process;response to stimulus	cytosol	catalytic activity	Pf05025	282969	ENSG00000148803.11	FUOM	10			0	3.559	0.01	0.01		0.01	5.22813e-07	3.59486e-16	4.24865e-16		3.9087e-16	255.04					87.7	312.3				122.26
[truncated: 15 more columns]
