# Supplementary material for: Mutant KRAS-Associated Proteome Is Mainly Controlled by Exogenous Factors
Source: Cells. 2022 Jun 21;11(13):1988. doi: 10.3390/cells11131988 (PMC9265670; doi:10.3390/cells11131988)
Supplement: Supplementary file 1 [file cells-11-01988-s001.zip › Supplementary file S8_LS174T_siKRAS_ctrlCM_vs_sCTRL_ctrlCM.xlsx]

## Sheet: Folha1
Checked	Protein FDR Confidence: Combined	Master	Accession	Description	Exp. q-value: Combined	Contaminant	Sum PEP Score	Coverage [%]	# Peptides	# PSMs	# Unique Peptides	# Protein Groups	# AAs	MW [kDa]	calc. pI	Score Sequest HT: Sequest HT	# Peptides (by Search Engine): Sequest HT	Biological Process	Cellular Component	Molecular Function	Pfam IDs	Entrez Gene ID	Ensembl Gene ID	Gene Symbol	Chromosome	KEGG Pathways	WikiPathways	# Razor Peptides	Abundance Ratio: (6_LS174T_siCTRL_FibCM) / (5_LS174T_siCTRL_ctrlCM)	Abundance Ratio: (7_LS174T_siKRAS_ctrlCM) / (5_LS174T_siCTRL_ctrlCM)	Abundance Ratio: (8_LS174T_siKRAS_FibCM) / (6_LS174T_siCTRL_FibCM)	Abundance Ratio: (8_LS174T_siKRAS_FibCM) / (7_LS174T_siKRAS_ctrlCM)	Abundance Ratio: (8_LS174T_siKRAS_FibCM) / (5_LS174T_siCTRL_ctrlCM)	Abundance Ratio Adj. P-Value: (6_LS174T_siCTRL_FibCM) / (5_LS174T_siCTRL_ctrlCM)	Abundance Ratio Adj. P-Value: (7_LS174T_siKRAS_ctrlCM) / (5_LS174T_siCTRL_ctrlCM)	Abundance Ratio Adj. P-Value: (8_LS174T_siKRAS_FibCM) / (6_LS174T_siCTRL_FibCM)	Abundance Ratio Adj. P-Value: (8_LS174T_siKRAS_FibCM) / (7_LS174T_siKRAS_ctrlCM)	Abundance Ratio Adj. P-Value: (8_LS174T_siKRAS_FibCM) / (5_LS174T_siCTRL_ctrlCM)	Abundance Ratio Variability [%]: (6_LS174T_siCTRL_FibCM) / (5_LS174T_siCTRL_ctrlCM)	Abundance Ratio Variability [%]: (7_LS174T_siKRAS_ctrlCM) / (5_LS174T_siCTRL_ctrlCM)	Abundance Ratio Variability [%]: (8_LS174T_siKRAS_FibCM) / (6_LS174T_siCTRL_FibCM)	Abundance Ratio Variability [%]: (8_LS174T_siKRAS_FibCM) / (7_LS174T_siKRAS_ctrlCM)	Abundance Ratio Variability [%]: (8_LS174T_siKRAS_FibCM) / (5_LS174T_siCTRL_ctrlCM)	Abundances (Grouped): 5_LS174T_siCTRL_ctrlCM	Abundances (Grouped): 6_LS174T_siCTRL_FibCM	Abundances (Grouped): 7_LS174T_siKRAS_ctrlCM	Abundances (Grouped): 8_LS174T_siKRAS_FibCM	Abundances (Grouped) CV [%]: 5_LS174T_siCTRL_ctrlCM	Abundances (Grouped) CV [%]: 6_LS174T_siCTRL_FibCM
TRUE	High	Master Protein	Q658P3	Metalloreductase STEAP3 OS=Homo sapiens OX=9606 GN=STEAP3 PE=1 SV=2	0.001	FALSE	6.441	5	2	5	2	1	488	54.6	8.6	8.32	2	cell death;metabolic process;regulation of biological process;transport	cytoplasm;endosome;membrane	catalytic activity;metal ion binding;nucleotide binding;protein binding	Pf01210, Pf03446, Pf03807	55240	ENSG00000115107.19	STEAP3	2	p53 signaling pathway	Iron metabolism in placenta; Copper homeostasis	0	100	100	1.044	0.879	100	4.49643e-16	3.59486e-16	0.998862	0.843696	3.9087e-16			50.62	48.62			133.4	154.6	112		17.7
TRUE	High	Master Protein	O00391	Sulfhydryl oxidase 1 OS=Homo sapiens OX=9606 GN=QSOX1 PE=1 SV=3	0	FALSE	21.362	8	4	6	4	1	747	82.5	8.92	20.97	4	cellular homeostasis;metabolic process;regulation of biological process;transport	extracellular;Golgi;membrane;organelle lumen	catalytic activity	Pf00085, Pf04777, Pf13905	5768	ENSG00000116260.16	QSOX1	1			0	100	100	0.737	1.145	100	4.49643e-16	3.59486e-16	0.240769	0.731136	3.9087e-16			3.04	62.32			85.3	191.4	123.3		32.03
TRUE	High	Master Protein	P05062	Fructose-bisphosphate aldolase B OS=Homo sapiens OX=9606 GN=ALDOB PE=1 SV=2	0	FALSE	29.154	20	6	18	5	1	364	39.4	7.87	43.04	6	cell organization and biogenesis;metabolic process;regulation of biological process	cytoplasm;cytoskeleton;cytosol	catalytic activity;protein binding	Pf00274	229	ENSG00000136872.17	ALDOB	9	Carbon metabolism; Fructose and mannose metabolism; Pentose phosphate pathway; Glycolysis / Gluconeogenesis; Biosynthesis of amino acids; Metabolic pathways	Glycolysis and Gluconeogenesis; Polyol Pathway	0	100	100	0.01	0.01		4.49643e-16	3.59486e-16	4.24865e-16	3.54689e-16								176.5	223.5
TRUE	High	Master Protein	Q8IWA4	Mitofusin-1 OS=Homo sapiens OX=9606 GN=MFN1 PE=1 SV=3	0	FALSE	9.134	5	3	4	2	1	741	84.1	6.33	6.17	3	cell communication;cell organization and biogenesis;metabolic process;response to stimulus	membrane;mitochondrion	catalytic activity;nucleotide binding;protein binding	Pf00350, Pf01926, Pf04799	55669	ENSG00000171109.18	MFN1	3	NOD-like receptor signaling pathway		0	100	100	0.01	0.01		4.49643e-16	3.59486e-16	4.24865e-16	3.54689e-16								233.1	166.9			30.69
TRUE	High	Master Protein	Q14202	Zinc finger MYM-type protein 3 OS=Homo sapiens OX=9606 GN=ZMYM3 PE=1 SV=2	0	FALSE	18.243	6	3	4	3	1	1370	152.3	6.35	8.35	3	cell organization and biogenesis;development;regulation of biological process	cytoplasm;nucleus	DNA binding;metal ion binding	Pf06467, Pf12012, Pf12526	9203	ENSG00000147130.14	ZMYM3	X			0		100	100	0.639	100		3.59486e-16	4.24865e-16	0.238329	3.9087e-16				20.95				272.7	127.3
TRUE	High	Master Protein	Q14004	Cyclin-dependent kinase 13 OS=Homo sapiens OX=9606 GN=CDK13 PE=1 SV=2	0	FALSE	21.294	4	4	22	2	1	1512	164.8	9.69	62.09	4	cell division;development;metabolic process;regulation of biological process;transport	chromosome;cytosol;extracellular;Golgi;nucleus	catalytic activity;DNA binding;nucleotide binding;protein binding;RNA binding	Pf00069, Pf07714	8621	ENSG00000065883.14	CDK13	7			0	100	100	1.384	2.523	100	4.49643e-16	3.59486e-16	0.661759	7.66473e-06	3.9087e-16			11.68	88.79			134.2	32.8	233		18.27
TRUE	High	Master Protein	O14763	Tumor necrosis factor receptor superfamily member 10B OS=Homo sapiens OX=9606 GN=TNFRSF10B PE=1 SV=2	0.001	FALSE	6.05	7	2	2	2	1	440	47.8	5.55	3.76	2	cell death;cellular component movement;defense response;development;metabolic process;regulation of biological process;response to stimulus	cell surface;membrane	protein binding;receptor activity;signal transducer activity	Pf00020, Pf00531	8795	ENSG00000120889.12	TNFRSF10B	8	Cytokine-cytokine receptor interaction; Natural killer cell mediated cytotoxicity; Apoptosis; p53 signaling pathway; Measles; Influenza A	DNA Damage Response; Apoptosis; miRNA Regulation of DNA Damage Response; Apoptosis-related network due to altered Notch3 in ovarian cancer	0	2.24	15.227	0.01	0.01	0.01	3.18124e-06	3.59486e-16	4.24865e-16	3.54689e-16	3.9087e-16	30.88	30.88				21.7	48.5	329.8		28.84
TRUE	High	Master Protein	P08123	Collagen alpha-2(I) chain OS=Homo sapiens OX=9606 GN=COL1A2 PE=1 SV=7	0	FALSE	27.426	5	4	6	4	1	1366	129.2	8.95	17.59	4	cell organization and biogenesis;cellular component movement;coagulation;metabolic process;regulation of biological process;response to stimulus	endoplasmic reticulum;extracellular;organelle lumen	metal ion binding;protein binding;structural molecule activity	Pf01391, Pf01410	1278	ENSG00000164692.17	COL1A2	7	Amoebiasis; Protein digestion and absorption; AGE-RAGE signaling pathway in diabetic complications; Focal adhesion; ECM-receptor interaction; PI3K-Akt signaling pathway; Platelet activation	miRNA targets in ECM and membrane receptors; TGF-beta Signaling Pathway; Focal Adhesion-PI3K-Akt-mTOR-signaling pathway; Inflammatory Response Pathway; Focal Adhesion	0	2.105	8.762	0.831	0.131	1.15	2.81043e-06	3.59486e-16	0.480817	3.54689e-16	0.93579	66.15	0	57.73	0.86	49.78	11.6	139.8	101.2	147.4		78.36
TRUE	High	Master Protein	Q9H446	RWD domain-containing protein 1 OS=Homo sapiens OX=9606 GN=RWDD1 PE=1 SV=1	0	FALSE	10.497	11	2	5	2	1	243	27.9	4.2	18.52	2	metabolic process;regulation of biological process;response to stimulus	cytoplasm	protein binding	Pf05773	51389	ENSG00000111832.12	RWDD1	6			0	3.333	8.285	1.28	0.615	4.268	1.9932e-06	3.59486e-16	0.810463	0.00118446	5.81049e-09	220.35	8.59	113.84	57.06	119.47	21.8	86.7	180.5	111	26.95	124.81
TRUE	High	Master Protein	Q9UBP0	Spastin OS=Homo sapiens OX=9606 GN=SPAST PE=1 SV=1	0	FALSE	17.91	9	3	5	3	1	616	67.2	9.64	14.39	3	cell differentiation;cell division;cell organization and biogenesis;cellular component movement;development;metabolic process;regulation of biological process;response to stimulus;transport	cytoplasm;cytoskeleton;cytosol;endoplasmic reticulum;endosome;membrane;nucleus	catalytic activity;nucleotide binding;protein binding	Pf00004, Pf00437, Pf01078, Pf04212, Pf05496, Pf06068, Pf07724, Pf07728, Pf13401	6683	ENSG00000021574.11	SPAST	2			0	4.513	6.398	0.939	0.837	4.238	6.53274e-10	3.07788e-13	0.899939	0.60759	3.9087e-16	34.27	0	30.23	24.49	0	8.2	37.1	132.6	222.1		31.85
TRUE	High	Master Protein	O94819	Kelch repeat and BTB domain-containing protein 11 OS=Homo sapiens OX=9606 GN=KBTBD11 PE=1 SV=1	0	FALSE	12.111	9	3	3	3	1	623	65.7	6.07	7.36	3	metabolic process		catalytic activity;protein binding	Pf00651, Pf01344, Pf13964	9920	ENSG00000176595.3; ENSG00000273645.2	KBTBD11	8; CHR_HSCHR8_8_CTG1			0	0.955	4.58	0.595	0.231	1.057	0.999984	8.5962e-12	0.125181	3.54689e-16	0.998894	89.42	0	0	0	0	64	61.1	223.3	51.6	37.5	47.44
TRUE	High	Master Protein	O75648	Mitochondrial tRNA-specific 2-thiouridylase 1 OS=Homo sapiens OX=9606 GN=TRMU PE=1 SV=2	0	FALSE	11.736	10	2	4	2	1	421	47.7	8.03	13.57	2	cell organization and biogenesis;metabolic process	mitochondrion	catalytic activity;nucleotide binding;RNA binding	Pf00733, Pf02540, Pf02568, Pf03054	55687	ENSG00000100416.12	TRMU	22	Sulfur relay system		0	0.909	3.558	0.01	0.01	0.01	0.987056	2.94097e-08	4.24865e-16	3.54689e-16	3.9087e-16	71.27	45.28				70.5	78.8	250.8		75.99	68.19
TRUE	High	Master Protein	Q9GZY8	Mitochondrial fission factor OS=Homo sapiens OX=9606 GN=MFF PE=1 SV=1	0	FALSE	11.766	18	3	6	3	1	342	38.4	8.95	13.71	3	cell organization and biogenesis;regulation of biological process;transport	membrane;mitochondrion	protein binding	Pf05644	56947	ENSG00000168958.19	MFF	2			0	1.255	3.547	0.314	0.461	1.128	0.323498	4.52877e-09	6.29666e-13	0.000613024	0.961714	38.45	0	12.46	14.22	63.2	124	186.7	49.3	40.1	45.77	65.35
TRUE	High	Master Protein	Q9HD42	Charged multivesicular body protein 1a OS=Homo sapiens OX=9606 GN=CHMP1A PE=1 SV=1	0	FALSE	12.066	13	3	6	3	1	196	21.7	8.06	8.03	3	cell communication;cell division;cell organization and biogenesis;metabolic process;regulation of biological process;response to stimulus;transport	chromosome;cytoplasm;endosome;membrane;nucleus	catalytic activity;metal ion binding;protein binding	Pf03357	5119	ENSG00000131165.14	CHMP1A	16	Endocytosis		0	1.148	3.542	1.846	0.938	2.989	0.811577	4.35013e-05	0.0177934	0.955157	0.000245272	86.64	21.95	68.37	37.46	104.5	35.5	241.5	66.6	56.3	140.8	68.29
TRUE	High	Master Protein	Q96KC8	DnaJ homolog subfamily C member 1 OS=Homo sapiens OX=9606 GN=DNAJC1 PE=1 SV=1	0	FALSE	16.3	8	4	13	4	1	554	63.8	8.63	30.07	4	metabolic process;regulation of biological process	endoplasmic reticulum;membrane;nucleus	DNA binding;enzyme regulator activity;protein binding	Pf00226, Pf00249	64215	ENSG00000136770.10	DNAJC1	10	Protein processing in endoplasmic reticulum		0	1.061	3.39	1.625	1.124	2.23	0.925041	3.86863e-06	0.0786477	0.768015	0.000129116	80.72	69.49	58.47	21.97	95.52	36.2	90.1	133.6	140.1	58.04	66.62
TRUE	High	Master Protein	Q92796	Disks large homolog 3 OS=Homo sapiens OX=9606 GN=DLG3 PE=1 SV=2	0	FALSE	21.525	7	3	5	2	1	817	90.3	7.03	15.29	3	cell communication;cell organization and biogenesis;metabolic process;regulation of biological process;transport	cytoplasm;cytosol;membrane	catalytic activity;protein binding;transporter activity	Pf00018, Pf00595, Pf00625, Pf07653, Pf10368, Pf10600, Pf13180	1741	ENSG00000082458.11	DLG3	X	Hippo signaling pathway		0	3.089	3.262	0.926	0.928	1.058	5.41164e-12	3.42805e-05	0.886164	0.94221	0.997101	262.12	99.35	41.47	83.05	8.28	72.4	190.7	87.5	49.4
TRUE	High	Master Protein	Q9HA65	TBC1 domain family member 17 OS=Homo sapiens OX=9606 GN=TBC1D17 PE=1 SV=2	0.001	FALSE	6.772	3	2	4	2	1	648	72.7	5.19	8.28	2	metabolic process;regulation of biological process;transport	cytosol;endosome;vacuole	enzyme regulator activity;protein binding	Pf00566, Pf12068	79735		TBC1D17	19			0	0.634	2.868	0.936	0.398	0.618	0.350275	2.13368e-07	0.921974	5.98603e-09	0.152658	9.36	9.38	0.07	16.57	2.24	74.5	49.2	222.6	53.7	7.36	26.41
TRUE	High	Master Protein	P17152	Transmembrane protein 11, mitochondrial OS=Homo sapiens OX=9606 GN=TMEM11 PE=1 SV=1	0.001	FALSE	6.717	13	2	5	2	1	192	21.5	7.36	10.64	2	cell organization and biogenesis	membrane;mitochondrion	protein binding	Pf14972	8834	ENSG00000178307.9	TMEM11	17			0	2.38	2.862	1.247	1.037	2.968	8.03937e-07	1.09874e-05	0.868284	0.955157	1.50908e-09	65.47	103.91	89.63	16.47	116.09	63.4	97.6	117.3	121.7	50.57	73.16
TRUE	High	Master Protein	Q9H9H4	Vacuolar protein sorting-associated protein 37B OS=Homo sapiens OX=9606 GN=VPS37B PE=1 SV=1	0	FALSE	15.312	24	3	7	3	1	285	31.3	7.34	18.64	3	cell communication;cell organization and biogenesis;metabolic process;regulation of biological process;response to stimulus;transport	cytoplasm;endosome;membrane	protein binding	Pf07200	79720	ENSG00000139722.6	VPS37B	12	Endocytosis		0	0.01	2.752	100	0.752	2.072	4.49643e-16	0.000584035	4.24865e-16	0.469439	0.0338405		43.21		12.54	44.01	72.4		199.2	128.5	46.29
TRUE	High	Master Protein	Q9BVL2	Nucleoporin p58/p45 OS=Homo sapiens OX=9606 GN=NUP58 PE=1 SV=1	0	FALSE	18.151	7	3	11	3	1	599	60.9	9.33	22.01	3	cell organization and biogenesis;metabolic process;regulation of biological process;transport	membrane;nucleus	protein binding;structural molecule activity;transporter activity		9818	ENSG00000139496.15	NUPL1; NUP58	13	RNA transport		0	0.882	2.742	0.865	0.261	0.812	0.90248	5.72879e-13	0.600961	3.54689e-16	0.345862	32.66	32.76	57.22	6.06	45.83	91.9	48.6	194.4	65	40.29	69.23
TRUE	High	Master Protein	Q99470	Stromal cell-derived factor 2 OS=Homo sapiens OX=9606 GN=SDF2 PE=1 SV=2	0	FALSE	17.465	22	2	7	2	1	211	23	7.33	26.29	2	metabolic process;response to stimulus	extracellular;membrane	catalytic activity	Pf02815	6388	ENSG00000132581.9	SDF2	17			0	1.013	2.66	0.928	0.353	0.94	0.97502	1.319e-06	0.91355	7.78769e-15	0.961714	73.41	99.67	60.83	11.98	53.55	71.3	72.2	189.6	67	93.79	74.12
TRUE	High	Master Protein	Q9NXV2	BTB/POZ domain-containing protein KCTD5 OS=Homo sapiens OX=9606 GN=KCTD5 PE=1 SV=1	0	FALSE	27.014	29	3	8	3	1	234	26.1	6.24	21.21	3	cell organization and biogenesis;metabolic process	cytoplasm;cytosol;nucleus	protein binding	Pf02214	54442	ENSG00000167977.8	KCTD5	16			0	3.276	2.61	0.5	0.698	1.664	1.8301e-10	0.00120665	0.000454289	0.277964	0.30383	40.59	27.17	9.04	28.74	46.21	68.7	146.2	88.9	96.2	24.62	68.62
TRUE	High	Master Protein	P07998	Ribonuclease pancreatic OS=Homo sapiens OX=9606 GN=RNASE1 PE=1 SV=4	0.001	FALSE	6.941	30	2	4	2	1	156	17.6	8.79	8.16	2	defense response;metabolic process;response to stimulus	extracellular	catalytic activity;protein binding	Pf00074	6035	ENSG00000129538.13	RNASE1	14			0	0.01	2.575	100	0.55	1.159	4.49643e-16	7.05753e-05	4.24865e-16	0.000227355	0.924358		0		9	0	89.8		200.2	110
TRUE	High	Master Protein	O75795	UDP-glucuronosyltransferase 2B17 OS=Homo sapiens OX=9606 GN=UGT2B17 PE=1 SV=1	0	FALSE	27.718	14	7	23	7	1	530	61.1	8.54	52.61	7	metabolic process	endoplasmic reticulum;membrane	catalytic activity	Pf00201, Pf04101	7367	ENSG00000197888.2	UGT2B17	4	Ascorbate and aldarate metabolism; Metabolism of xenobiotics by cytochrome P450; Porphyrin and chlorophyll metabolism; Retinol metabolism; Drug metabolism - cytochrome P450; Chemical carcinogenesis; Pentose and glucuronate interconversions; Metabolic pathways; Drug metabolism - other enzymes; Steroid hormone biosynthesis	Metapathway biotransformation; Glucuronidation	0	0.995	2.467	2.484	1.09	2.804	0.972692	6.5552e-13	4.24865e-16	0.728427	3.9087e-16	70.16	61.8	64	31.11	57.07	52.3	60.1	137	150.6	50.45	50.69
TRUE	High	Master Protein	Q01524	Defensin-6 OS=Homo sapiens OX=9606 GN=DEFA6 PE=1 SV=1	0	FALSE	28.079	40	2	8	2	1	100	11	5.38	30.78	2	defense response;response to stimulus	extracellular;organelle lumen	protein binding	Pf00323, Pf00879, Pf13841	1671	ENSG00000164822.4	DEFA6	8			0	0.811	2.409	3.617	1.091	2.713	0.781856	4.6805e-09	4.24865e-16	0.730623	3.9087e-16	32.58	33.35	61.49	32.06	43.16	66.6	33.8	146.6	153	62	75.83
TRUE	High	Master Protein	P58557	Endoribonuclease YbeY OS=Homo sapiens OX=9606 GN=YBEY PE=1 SV=2	0	FALSE	24.199	16	2	8	2	1	167	19.3	7.55	30.62	2	metabolic process	mitochondrion;nucleus	catalytic activity;metal ion binding	Pf02130	54059	ENSG00000182362.13	YBEY	21			0	1.488	2.375	0.89	0.565	1.301	0.021483	5.32045e-07	0.734206	1.23345e-05	0.71222	61.46	59.73	62.39	34.05	80.47	46.9	119.3	189.4	44.4	77.72	8.75
TRUE	High	Master Protein	Q9NV88	Integrator complex subunit 9 OS=Homo sapiens OX=9606 GN=INTS9 PE=1 SV=2	0.001	FALSE	7.422	6	2	4	2	1	658	73.8	6.33	9.67	2	metabolic process	cytosol;nucleus	protein binding	Pf10996	55756	ENSG00000104299.14	INTS9	8			0	2.053	2.37	1.535	1.33	3.151	0.0140203	0.0113954	0.467829	0.50477	3.25654e-05	139.53	147.06	7.79	0	147.06	46.7	95.8	110.6	147	99.59	7.42
TRUE	High	Master Protein	Q9NZC3	Glycerophosphodiester phosphodiesterase 1 OS=Homo sapiens OX=9606 GN=GDE1 PE=1 SV=1	0.001	FALSE	6.722	11	2	2	2	1	331	37.7	6.71	2.52	2	metabolic process	membrane	catalytic activity;metal ion binding	Pf03009	51573	ENSG00000006007.11	GDE1	16			0	0.01	2.368	100	0.29	0.666	4.49643e-16	0.0340331	4.24865e-16	6.10151e-10	0.448035		79.66		4.24	49.9	49.1		163.9	187	85.41
TRUE	High	Master Protein	Q15388	Mitochondrial import receptor subunit TOM20 homolog OS=Homo sapiens OX=9606 GN=TOMM20 PE=1 SV=1	0	FALSE	13.513	39	2	5	2	1	145	16.3	8.6	20.67	2	cell communication;cell organization and biogenesis;metabolic process;response to stimulus;transport	membrane;mitochondrion	protein binding;transporter activity	Pf02064	9804	ENSG00000173726.10	TOMM20	1			0	1.547	2.332	1.439	1.505	1.855	0.272723	0.085408	0.743957	0.390901	0.218689	76.01	80.75	45.31	94.02	77.2	54.5	99.4	134.1	112	78.04	2.57
TRUE	High	Master Protein	P50747	Biotin--protein ligase OS=Homo sapiens OX=9606 GN=HLCS PE=1 SV=1	0.002	FALSE	4.537	3	2	2	2	1	726	80.7	5.62	2.51	2	cell organization and biogenesis;cell proliferation;metabolic process;response to stimulus	chromosome;cytoplasm;cytosol;mitochondrion	catalytic activity;nucleotide binding;protein binding	Pf02237, Pf03099, Pf09825	3141	ENSG00000159267.14	HLCS	21	Biotin metabolism; Metabolic pathways		0	0.624	2.308	1.405	0.38	0.877	0.57793	0.0925216	0.886164	0.0018327	0.961714	17.79	0	45.73	0	0	53.7	33.5	265.7	47.1		41.68
TRUE	High	Master Protein	O60613	Selenoprotein F OS=Homo sapiens OX=9606 GN=SELENOF PE=1 SV=4	0	FALSE	26.345	40	4	14	4	1	165	18.1	5.03	44.59	4											0	1.443	2.293	1.654	1.076	2.163	0.0193288	3.42593e-08	0.00872586	0.827178	2.49116e-09	77	62.49	49.22	58.73	50.18	55.6	79.6	128.3	136.4	46.83	6.24
TRUE	High	Master Protein	Q86WA6	Valacyclovir hydrolase OS=Homo sapiens OX=9606 GN=BPHL PE=1 SV=1	0	FALSE	11.815	11	2	5	2	1	291	32.5	9.14	19.1	2	metabolic process;response to stimulus	membrane;mitochondrion	catalytic activity	Pf00561, Pf01738, Pf12695, Pf12697	670	ENSG00000137274.12	BPHL	6			0	1.524	2.271	1.44	1.198	1.703	0.0354225	0.00117707	0.358938	0.583788	0.0275459	91.29	53.1	77.05	22.41	41.06	65.6	85.3	113	136	69.4	51.07
TRUE	High	Master Protein	Q6Y288	Beta-1,3-glucosyltransferase OS=Homo sapiens OX=9606 GN=B3GLCT PE=1 SV=2	0	FALSE	13.582	8	2	5	2	1	498	56.5	7.5	14.62	2	metabolic process	endoplasmic reticulum;membrane	catalytic activity	Pf02434	145173	ENSG00000187676.7	B3GALTL; B3GLCT	13	Other types of O-glycan biosynthesis		0	1.12	2.25	2.311	1.617	3.288	0.840569	0.00460858	4.32185e-05	0.000931864	2.39778e-13	82.3	106.5	88.77	45.57	90.42	81.6	83.6	78.9	156	66.51	59.12
TRUE	High	Master Protein	Q8IUE6	Histone H2A type 2-B OS=Homo sapiens OX=9606 GN=HIST2H2AB PE=1 SV=3	0	FALSE	34.15	52	4	41	2	1	130	14	10.89	145.07	4	regulation of biological process	chromosome;nucleus	DNA binding;protein binding	Pf00125, Pf00808	317772	ENSG00000184270.4	HIST2H2AB	1	Systemic lupus erythematosus; Alcoholism		0	2.189	2.23	0.927	0.858	1.951	9.86099e-13	3.77426e-07	0.744149	0.521906	3.2877e-06	125.22	108.56	76.43	70.38	74.98	56.8	147.5	97.7	98	55.32	43.71
TRUE	High	Master Protein	P98172	Ephrin-B1 OS=Homo sapiens OX=9606 GN=EFNB1 PE=1 SV=1	0	FALSE	19.449	14	2	9	2	1	346	38	8.94	32	2	cell communication;cell differentiation;cellular component movement;development;regulation of biological process;response to stimulus	cytoplasm;membrane;nucleus	protein binding	Pf00812	1947	ENSG00000090776.5	EFNB1	X	Axon guidance		0	2.366	2.201	0.601	0.637	1.149	6.53954e-08	0.00779029	0.0106179	0.0355427	0.961714	52.08	58.13	19.24	18.91	72.07	51.5	139.6	127.7	81.3	68.94	19.28
TRUE	High	Master Protein	Q13227	G protein pathway suppressor 2 OS=Homo sapiens OX=9606 GN=GPS2 PE=1 SV=3	0	FALSE	9.027	6	2	7	2	1	327	36.7	9.52	12.78	2	metabolic process;regulation of biological process;response to stimulus	nucleus	enzyme regulator activity;protein binding	Pf09770	2874	ENSG00000132522.15	GPS2	17	HTLV-I infection		0	1.331	2.183	0.953	0.56	1.846	0.638849	0.023419	0.940515	0.0168107	0.116814	52.26	21.15	40.05	11.34	86.99	54.5	84.6	143.6	117.3	59.97	73.58
TRUE	High	Master Protein	Q13595	Transformer-2 protein homolog alpha OS=Homo sapiens OX=9606 GN=TRA2A PE=1 SV=1	0	FALSE	12.264	12	2	3	2	1	282	32.7	11.27	8.27	2	metabolic process	nucleus	RNA binding	Pf00076, Pf13893, Pf14259	29896	ENSG00000164548.10	TRA2A	7	Spliceosome		0	0.392	2.171	1.177	0.855	1.246	7.5682e-07	0.00539881	0.921974	0.753888	0.763711	24	92.68	47.31	39.83	4.19	79.1	75.5	153	92.3	3.99	7.04
TRUE	High	Master Protein	Q7Z4H8	Protein O-glucosyltransferase 3 OS=Homo sapiens OX=9606 GN=KDELC2 PE=1 SV=2	0	FALSE	14.719	10	3	4	3	1	507	58.5	8.24	12.99	3	metabolic process	endoplasmic reticulum;organelle lumen	catalytic activity;protein binding	Pf00630, Pf05686, Pf13524	143888	ENSG00000178202.12	KDELC2	11			0	1.244	2.169	0.498	1.046	1.346	0.382601	0.0136808	1.83022e-06	0.955031	0.520017	52.56	54.19	31.04	64.36	135.87	63.8	163.3	82	90.9	103.87	56.83
TRUE	High	Master Protein	Q14938	Nuclear factor 1 X-type OS=Homo sapiens OX=9606 GN=NFIX PE=1 SV=2	0	FALSE	23.204	13	3	6	3	1	502	55.1	8.68	17.72	3	metabolic process;regulation of biological process	nucleus	DNA binding;protein binding	Pf00859, Pf03165, Pf10524	4784	ENSG00000008441.16	NFIX	19		Oxidative Stress	0	1.631	2.146	0.763	0.58	0.866	0.122985	0.0204024	0.50522	0.029011	0.948374	53.21	53.21	34.34	17.77	72.63	22	148.1	199	30.8	119.64
TRUE	High	Master Protein	Q96IZ7	Serine/Arginine-related protein 53 OS=Homo sapiens OX=9606 GN=RSRC1 PE=1 SV=1	0	FALSE	9.457	9	2	3	2	1	334	38.7	11.08	4.23	2	metabolic process;response to stimulus;transport	cytoplasm;nucleus	protein binding		51319	ENSG00000174891.12	RSRC1	3			0	1.166	2.129	1.389	0.799	1.457	0.849598	0.0387007	0.793747	0.641182	0.627349	60.63	75.67	57.13	32.82	78.01	62.8	65.1	135.6	136.4	69.38	29.38
TRUE	High	Master Protein	Q9Y6Y0	Influenza virus NS1A-binding protein OS=Homo sapiens OX=9606 GN=IVNS1ABP PE=1 SV=3	0	FALSE	12.228	6	2	5	2	1	642	71.7	5.53	14.6	2	metabolic process;regulation of biological process;response to stimulus	cytoplasm;cytoskeleton;cytosol;nucleus;spliceosomal complex	protein binding	Pf00651, Pf01344, Pf07646, Pf07707, Pf13415, Pf13418, Pf13854, Pf13964	10625	ENSG00000116679.15	IVNS1ABP	1	Influenza A		0	0.698	2.067	1.934	0.639	1.35	0.645113	0.0327028	0.0557322	0.121623	0.707029	5.3	10.36	33.15	13.96	36.04	75.1	62.7	160.7	101.4	4.77	35.33
TRUE	High	Master Protein	P57076	Cilia- and flagella-associated protein 298 OS=Homo sapiens OX=9606 GN=CFAP298 PE=1 SV=1	0	FALSE	13.246	20	2	2	2	1	290	33.2	7.44	6.77	2	cell organization and biogenesis;regulation of biological process	cytoplasm;cytoskeleton;cytosol;nucleus		Pf11069	56683	ENSG00000159079.18	C21orf59	21			0	2.065	2.057	0.73	0.733	1.507	0.00022635	0.0241697	0.213149	0.444103	0.411424	52.51	52.51	30.75	31.01	40.81	60.3	124.6	124.1	90.9	47.21
TRUE	High	Master Protein	O14896	Interferon regulatory factor 6 OS=Homo sapiens OX=9606 GN=IRF6 PE=1 SV=1	0	FALSE	8.559	11	2	4	2	1	467	53.1	5.33	3.27	2	cell differentiation;cell proliferation;metabolic process;regulation of biological process;response to stimulus	cytoplasm;cytosol;nucleus	DNA binding;protein binding	Pf00605, Pf10401	3664	ENSG00000117595.10	IRF6	1		Hypothetical Craniofacial Development Pathway; Apoptosis; Primary Focal Segmental Glomerulosclerosis FSGS	0	1.557	2.029	0.9	0.998	1.362	0.0717659	0.0291598	0.879285	0.999947	0.745889	70.78	97.93	26.93	87.3	67.48	54.7	121.7	170.9	52.6	24.25	78.68
TRUE	High	Master Protein	Q9H6H4	Receptor expression-enhancing protein 4 OS=Homo sapiens OX=9606 GN=REEP4 PE=1 SV=1	0	FALSE	24.777	17	3	12	3	1	257	29.4	9.73	39.81	3	cell division;cell organization and biogenesis	endoplasmic reticulum;membrane	protein binding	Pf03134	80346	ENSG00000168476.11	REEP4	8			0	0.818	0.493	0.941	1.054	0.728	0.454839	1.26745e-06	0.793747	0.930922	0.0521701	20.53	18.82	18.36	41	28.92	133.6	111	71.2	84.2	48.13	23.16
TRUE	High	Master Protein	P62166	Neuronal calcium sensor 1 OS=Homo sapiens OX=9606 GN=NCS1 PE=1 SV=2	0.001	FALSE	6.027	24	2	6	2	1	190	21.9	4.83	7.19	2	regulation of biological process;response to stimulus;transport	cytoplasm;cytosol;Golgi;membrane	metal ion binding;protein binding;transporter activity	Pf00036, Pf13405, Pf13499, Pf13833	23413	ENSG00000107130.9	NCS1	9			0	0.842	0.487	0.607	1.125	0.512	0.933093	0.0340331	0.125181	0.876824	0.0176474	57.56	0	29.93	10.23	0	56.9	47.9	135.8	159.4		67.88
TRUE	High	Master Protein	Q4J6C6	Prolyl endopeptidase-like OS=Homo sapiens OX=9606 GN=PREPL PE=1 SV=1	0	FALSE	13.63	6	3	8	3	1	727	83.9	6.38	21.69	3	metabolic process;regulation of biological process	cytoplasm;cytoskeleton;cytosol;Golgi	catalytic activity	Pf00326, Pf02897	9581	ENSG00000138078.15	PREPL	2			0	0.763	0.484	1.059	1.487	0.813	0.235248	5.87877e-05	0.999979	0.0123698	0.326672	54.19	15.74	64.76	69.84	32.09	136.9	125.4	38.5	99.2	15.57	75.11
TRUE	High	Master Protein	P29317	Ephrin type-A receptor 2 OS=Homo sapiens OX=9606 GN=EPHA2 PE=1 SV=2	0	FALSE	32.104	8	5	17	4	1	976	108.2	6.23	50	5	cell death;cell differentiation;cell organization and biogenesis;cell proliferation;cellular component movement;defense response;development;metabolic process;regulation of biological process;response to stimulus	cell surface;membrane	catalytic activity;nucleotide binding;protein binding;receptor activity;signal transducer activity	Pf00041, Pf00069, Pf00536, Pf01404, Pf07647, Pf07699, Pf07714, Pf09294, Pf14575	1969	ENSG00000142627.12	EPHA2	1	Rap1 signaling pathway; Ras signaling pathway; Axon guidance; PI3K-Akt signaling pathway	NRF2 pathway; Focal Adhesion-PI3K-Akt-mTOR-signaling pathway	0	1.066	0.483	0.623	1.083	0.721	0.875238	0.00025607	0.0141799	0.922207	0.0837053	42.66	9.29	17.34	23.12	22.79	144	159.8	50.7	45.6	25.02	20.43
TRUE	High	Master Protein	Q9H3K2	Growth hormone-inducible transmembrane protein OS=Homo sapiens OX=9606 GN=GHITM PE=1 SV=2	0	FALSE	26.667	15	4	22	4	1	345	37.2	9.94	28.22	4	cell death	membrane;mitochondrion	protein binding		27069	ENSG00000165678.20	GHITM	10			0	0.73	0.475	1.307	2.015	1.113	0.302162	3.14172e-05	0.623539	7.32371e-08	0.950085	30.94	8.27	45.45	62.38	42.05	86.3	117.2	94.2	102.4	63.21	32.65
TRUE	High	Master Protein	Q9UBT3	Dickkopf-related protein 4 OS=Homo sapiens OX=9606 GN=DKK4 PE=1 SV=1	0	FALSE	18.669	16	3	7	3	1	224	24.9	8.38	19.39	3	development;regulation of biological process;response to stimulus	extracellular		Pf04706, Pf06607	27121	ENSG00000104371.4	DKK4	8	Wnt signaling pathway	Extracellular vesicle-mediated signaling in recipient cells; EDA Signalling in Hair Follicle Development	0	0.939	0.448	0.693	1.319	0.637	0.989041	4.80695e-06	0.0400911	0.216213	0.00632856	26.22	17.33	19.72	72.21	17.9	133.1	141.7	53.2	72	13.61	84.2
TRUE	High	Master Protein	Q9H999	Pantothenate kinase 3 OS=Homo sapiens OX=9606 GN=PANK3 PE=1 SV=1	0	FALSE	10.185	8	2	4	2	1	370	41.1	6.55	6.21	2	metabolic process	cytoplasm	catalytic activity;nucleotide binding	Pf03630	79646	ENSG00000120137.6	PANK3	5	Pantothenate and CoA biosynthesis; Metabolic pathways		0	0.623	0.441	0.889	1.29	0.554	0.404408	0.0795361	0.878473	0.728994	0.0795259	0	0	13.74	4.15	0	78.6	152.1	45.8	123.6		22.34
TRUE	High	Master Protein	Q9ULF5	Zinc transporter ZIP10 OS=Homo sapiens OX=9606 GN=SLC39A10 PE=1 SV=2	0	FALSE	37.288	13	7	18	7	1	831	94.1	6.76	37.72	7	cellular homeostasis;regulation of biological process;transport	membrane	transporter activity	Pf02535, Pf14667	57181	ENSG00000196950.13	SLC39A10	2		NRF2 pathway; Zinc homeostasis	0	0.919	0.439	0.622	0.929	0.446	0.956637	2.06976e-09	1.54368e-05	0.868209	4.32762e-10	38.21	13.95	30.24	40.27	15.43	111.9	117.2	86.6	84.3	36.37	39.01
TRUE	High	Master Protein	O75629	Protein CREG1 OS=Homo sapiens OX=9606 GN=CREG1 PE=1 SV=1	0	FALSE	19.706	18	3	15	3	1	220	24.1	7.59	58.7	3	cell proliferation;development;regulation of biological process;transport	extracellular;organelle lumen	protein binding	Pf13883	8804	ENSG00000143162.7	CREG1	1		Senescence and Autophagy in Cancer	0	1.006	0.435	1.02	1.359	0.799	0.946581	1.14835e-08	0.980391	0.225552	0.186454	97.1	18.62	114.22	106.53	67.61	156.2	150.8	31.5	61.5	63.68	54.33
TRUE	High	Master Protein	P23443	Ribosomal protein S6 kinase beta-1 OS=Homo sapiens OX=9606 GN=RPS6KB1 PE=1 SV=2	0	FALSE	16.072	5	2	9	2	1	525	59.1	6.65	27.33	2	cell death;cellular component movement;defense response;metabolic process;regulation of biological process;response to stimulus	cell surface;cytoplasm;cytosol;membrane;mitochondrion;nucleus	catalytic activity;nucleotide binding;protein binding	Pf00069, Pf00433, Pf07714, Pf14531	6198	ENSG00000108443.13	RPS6KB1	17	Longevity regulating pathway - multiple species; TGF-beta signaling pathway; Insulin signaling pathway; HIF-1 signaling pathway; Acute myeloid leukemia; Breast cancer; ErbB signaling pathway; EGFR tyrosine kinase inhibitor resistance; Proteoglycans in cancer; Choline metabolism in cancer; AMPK signaling pathway; mTOR signaling pathway; Fc gamma R-mediated phagocytosis; Endocrine resistance; Insul…	Focal Adhesion-PI3K-Akt-mTOR-signaling pathway; Insulin Signaling; BDNF-TrkB Signaling; EGF/EGFR Signaling Pathway; AMP-activated Protein Kinase (AMPK) Signaling; IL-6 signaling pathway; VEGFA-VEGFR2 Signaling Pathway; IL-5 Signaling Pathway; Brain-Derived Neurotrophic Factor (BDNF) signaling pathway; Prolactin Signaling Pathway; Leptin signaling pathway; ErbB Signaling Pathway; G13 Signaling Pat…	0	0.599	0.435	1.509	1.966	0.692	0.0149252	0.00429447	0.26001	0.00329549	0.270655	24.17	9.13	30.45	69.24	38.93	91.1	156.6	70	82.3	81.87	85.75
TRUE	High	Master Protein	Q9BZQ6	ER degradation-enhancing alpha-mannosidase-like protein 3 OS=Homo sapiens OX=9606 GN=EDEM3 PE=1 SV=2	0.001	FALSE	6.76	3	2	2	2	1	932	104.6	4.93	5.14	2	metabolic process;regulation of biological process;response to stimulus	endoplasmic reticulum;membrane;organelle lumen	catalytic activity;metal ion binding	Pf01532, Pf02225	80267	ENSG00000116406.18	EDEM3	1	Protein processing in endoplasmic reticulum		0	0.229	0.421	1.068	1.159	0.28	2.98834e-13	0.000204217	0.999979	0.888479	8.62547e-15	2.91	15.53	0	74.7	2.8	244.5	28	59.1	68.5	69.78	96.23
TRUE	High	Master Protein	Q7Z5G4	Golgin subfamily A member 7 OS=Homo sapiens OX=9606 GN=GOLGA7 PE=1 SV=2	0	FALSE	8.47	19	2	4	2	1	137	15.8	7.05	6.66	2	cell organization and biogenesis;metabolic process;regulation of biological process;transport	extracellular;Golgi;membrane	catalytic activity;protein binding	Pf10256	51125	ENSG00000147533.16	GOLGA7	8			0	0.429	0.411	3.335	3.476	1.43	0.00885452	0.00981538	2.27182e-05	1.79656e-08	0.579451	2.92	8.09	15.22	51.89	17.04	122.3	52.5	50.3	174.9	16.74	14.97
TRUE	High	Master Protein	Q8IZW8	Tensin-4 OS=Homo sapiens OX=9606 GN=TNS4 PE=1 SV=3	0	FALSE	79.789	36	17	55	17	1	715	76.7	7.34	92.49	17	cell death	cytoplasm;cytoskeleton;cytosol	protein binding	Pf00017, Pf08416	84951	ENSG00000131746.12	TNS4	17			0	1.044	0.374	0.615	1.447	0.63	0.823401	3.59486e-16	3.53177e-07	0.0165539	3.80074e-05	32	8.46	22.1	65.92	23.29	160.2	154.3	29.1	56.4	46.55	25.29
TRUE	High	Master Protein	Q9Y448	Small kinetochore-associated protein OS=Homo sapiens OX=9606 GN=KNSTRN PE=1 SV=2	0	FALSE	10.191	9	2	2	2	1	316	35.4	6.3	5.82	2	cell division;cell organization and biogenesis;regulation of biological process	chromosome;cytoplasm;cytoskeleton;cytosol;nucleus	protein binding		90417	ENSG00000128944.13	C15orf23; KNSTRN	15			0	0.126	0.366	7.816	2.697	0.987	4.49643e-16	0.0221464	1.92144e-10	0.00111331	0.992073	0.69	9.43	61.11	107.96	20.29	161.3	20.4	59	159.3	17.35	133.33
TRUE	High	Master Protein	O95749	Geranylgeranyl pyrophosphate synthase OS=Homo sapiens OX=9606 GN=GGPS1 PE=1 SV=1	0	FALSE	10.747	16	3	4	3	1	300	34.8	6.14	4.91	3	metabolic process;regulation of biological process	cytoplasm;cytosol	catalytic activity;metal ion binding;protein binding	Pf00348	9453	ENSG00000152904.11	GGPS1	1	Terpenoid backbone biosynthesis; Metabolic pathways		0	0.759	0.357	0.692	1.223	0.746	0.823401	0.000307619	0.477462	0.808111	0.635673	30.55	10.6	50.14	104.71	29.89	129.8	98.5	96.4	75.4	34.61	14.17
TRUE	High	Master Protein	P63098	Calcineurin subunit B type 1 OS=Homo sapiens OX=9606 GN=PPP3R1 PE=1 SV=2	0	FALSE	27.838	33	4	7	4	1	170	19.3	4.81	18.85	4	metabolic process;regulation of biological process;response to stimulus	cytoplasm;cytosol;membrane;mitochondrion	catalytic activity;metal ion binding;protein binding	Pf00036, Pf12763, Pf13405, Pf13499, Pf13833	5534	ENSG00000221823.10	PPP3R1	2	Th1 and Th2 cell differentiation; T cell receptor signaling pathway; Osteoclast differentiation; Glutamatergic synapse; Amphetamine addiction; cGMP-PKG signaling pathway; Renin secretion; B cell receptor signaling pathway; VEGF signaling pathway; MAPK signaling pathway; Oxytocin signaling pathway; Natural killer cell mediated cytotoxicity; Long-term potentiation; Tuberculosis; Glucagon signaling …	Alzheimers Disease; Energy Metabolism; Initiation of transcription and translation elongation at the HIV-1 LTR; TFs Regulate miRNAs related to cardiac hypertrophy; MAPK Signaling Pathway	0	0.707	0.348	1.748	1.733	1.012	0.231716	7.4547e-09	0.0537416	0.00206945	0.987452	29.57	7.78	35.32	71.7	53.31	133.9	75.7	95.5	94.9	46.98	54.27
TRUE	High	Master Protein	Q9NX24	H/ACA ribonucleoprotein complex subunit 2 OS=Homo sapiens OX=9606 GN=NHP2 PE=1 SV=1	0	FALSE	8.31	29	2	4	2	1	153	17.2	8.22	12.62	2	cell organization and biogenesis;metabolic process	nucleus	protein binding;RNA binding	Pf01248	55651	ENSG00000145912.8	NHP2	5	Ribosome biogenesis in eukaryotes		0	0.727	0.337	0.909	1.334	0.82	0.326106	3.99259e-07	0.868851	0.593664	0.561692	56.29	8.29	65.67	35.29	53.17	204.3	102.5	37.7	55.5	91.95	86.55
TRUE	High	Master Protein	Q7Z6M1	Rab9 effector protein with kelch motifs OS=Homo sapiens OX=9606 GN=RABEPK PE=1 SV=1	0	FALSE	10.343	9	2	6	2	1	372	40.5	6.25	13.69	2	transport	cytoplasm;cytosol;endosome;membrane	protein binding	Pf01344, Pf07646, Pf13415, Pf13418, Pf13854, Pf13964	10244	ENSG00000136933.16	RABEPK	9			0	0.835	0.335	0.838	2.836	0.764	0.752218	7.14315e-14	0.464037	3.54689e-16	0.0993519	29.88	31.38	43.94	342.38	32.7	147.7	88.5	53.2	110.7	123.92	125.59
TRUE	High	Master Protein	Q08174	Protocadherin-1 OS=Homo sapiens OX=9606 GN=PCDH1 PE=1 SV=2	0	FALSE	18.897	6	4	7	4	1	1060	114.7	5.03	18.16	4	cell communication	membrane;nucleus	metal ion binding	Pf00028, Pf08266, Pf08374	5097	ENSG00000156453.13	PCDH1	5			0	0.975	0.327	0.25	0.818	0.283	0.993866	0.00305285	2.21777e-07	0.867334	1.36247e-06	26.19	27.98	14.65	3.49	23.14	130.9	116.9	28.2	124	70.22	95.07
TRUE	High	Master Protein	P15151	Poliovirus receptor OS=Homo sapiens OX=9606 GN=PVR PE=1 SV=2	0.001	FALSE	7.017	4	2	10	2	1	417	45.3	6.52	20.05	2	cell organization and biogenesis;regulation of biological process	cell surface;cytoplasm;extracellular;membrane	protein binding;receptor activity	Pf00047, Pf08205	5817		PVR	19	Cell adhesion molecules (CAMs)		0	1.096	0.288	0.878	1.568	0.906	0.857984	5.09615e-09	0.712988	0.0791649	0.828715	34.01	11.35	43.77	86.88	40.67	122.1	116.5	58	103.4	18.08	88.34
TRUE	High	Master Protein	O75676	Ribosomal protein S6 kinase alpha-4 OS=Homo sapiens OX=9606 GN=RPS6KA4 PE=1 SV=1	0	FALSE	16.042	8	3	9	2	1	772	85.6	8.28	19.76	3	cell organization and biogenesis;defense response;metabolic process;regulation of biological process;response to stimulus	cytoplasm;cytosol;nucleus	catalytic activity;metal ion binding;nucleotide binding;protein binding	Pf00069, Pf00433, Pf01163, Pf01636, Pf07714, Pf14531	8986	ENSG00000162302.12	RPS6KA4	11	TNF signaling pathway; MAPK signaling pathway	Interferon type I signaling pathways; Angiopoietin Like Protein 8 Regulatory Pathway; Insulin Signaling	0	1.936	0.211		1.312	0.317	0.00835121	2.97584e-09		0.710394	8.36095e-06	121.73	2.09		94.07	14.58	125.4	169.6	42	63	114.83	5.63
TRUE	High	Master Protein	P78362	SRSF protein kinase 2 OS=Homo sapiens OX=9606 GN=SRPK2 PE=1 SV=3	0	FALSE	17.191	14	6	13	4	1	688	77.5	4.97	11.62	6	cell differentiation;cell organization and biogenesis;defense response;metabolic process;regulation of biological process;response to stimulus	cytoplasm;cytosol;nucleus	catalytic activity;metal ion binding;nucleotide binding;protein binding;RNA binding	Pf00069, Pf07714	6733	ENSG00000135250.16	SRPK2	7		mRNA Processing	0	0.303	0.208	0.445	1.043	0.649	1.1744e-05	2.54809e-06	0.0108632	0.969854	0.3906	4.39	0	24.15	46.42	22.34	105.5	89.6	94.3	110.5	83.29	100
TRUE	High	Master Protein	Q03001	Dystonin OS=Homo sapiens OX=9606 GN=DST PE=1 SV=4	0.001	FALSE	6.741	1	3	10	2	1	7570	860.1	5.25	5.6	3	cell organization and biogenesis;cellular component movement;regulation of biological process;response to stimulus;transport	cytoplasm;cytoskeleton;cytosol;endoplasmic reticulum;membrane;nucleus	metal ion binding;protein binding	Pf00307, Pf00435, Pf00681, Pf02187, Pf11971, Pf13499, Pf13833	667		DST	6			0	0.293	0.189	0.78	1.208	0.229	1.08274e-05	1.25776e-06	0.743662	0.848651	1.71679e-06	16.63	0	55.76	121.26	6.34	233.8	68.5	44.2	53.5		112.24
TRUE	High	Master Protein	Q9UDY4	DnaJ homolog subfamily B member 4 OS=Homo sapiens OX=9606 GN=DNAJB4 PE=1 SV=1	0	FALSE	16.72	10	3	16	2	1	337	37.8	8.5	49.46	3	metabolic process;regulation of biological process;response to stimulus	cytoplasm;cytosol;membrane	enzyme regulator activity;protein binding	Pf00226, Pf01556	11080	ENSG00000162616.8	DNAJB4	1			0	1.501	0.183	0.01	0.01	0.01	0.335348	1.98204e-06	4.24865e-16	3.54689e-16	3.9087e-16	0	0				149	223.7	27.2
TRUE	High	Master Protein	Q7Z7E8	Ubiquitin-conjugating enzyme E2 Q1 OS=Homo sapiens OX=9606 GN=UBE2Q1 PE=1 SV=1	0	FALSE	11.001	10	3	4	3	1	422	46.1	5.1	11.43	3	metabolic process;response to stimulus;transport	cytoplasm;cytosol;nucleus	catalytic activity;nucleotide binding;protein binding		55585	ENSG00000160714.9	UBE2Q1	1	Ubiquitin mediated proteolysis		0	0.097	0.142	1.728	1.178	0.167	4.49643e-16	3.59486e-16	0.604732	0.864275	2.29093e-09	1.12	8.29	125.78	411.54	0	93.3	9	282.1	15.6		134.45
TRUE	High	Master Protein	Q9NUM4	Transmembrane protein 106B OS=Homo sapiens OX=9606 GN=TMEM106B PE=1 SV=2	0.001	FALSE	6.767	11	2	2	2	1	274	31.1	6.99	4.76	2	cell organization and biogenesis;regulation of biological process;transport	endosome;membrane;vacuole	protein binding	Pf07092	54664	ENSG00000106460.18	TMEM106B	7			0	1.127	0.01	0.651	100	0.753	0.902251	3.59486e-16	0.303686	3.54689e-16	0.712986	35.41		12.55		13.93	136.4	159.7		104	99.13	31.68
TRUE	High	Master Protein	O75907	Diacylglycerol O-acyltransferase 1 OS=Homo sapiens OX=9606 GN=DGAT1 PE=1 SV=2	0	FALSE	11.801	12	2	7	2	1	488	55.2	9.32	11.72	2	cell organization and biogenesis;metabolic process;transport	endoplasmic reticulum;membrane	catalytic activity;protein binding	Pf03062	8694	ENSG00000185000.11	DGAT1	8	Fat digestion and absorption; Glycerolipid metabolism; Retinol metabolism; Metabolic pathways	Triacylglyceride Synthesis; Statin Pathway; Vitamin A and Carotenoid Metabolism	0	1.505	0.01	0.908	100	1.339	0.0943698	3.59486e-16	0.883316	3.54689e-16	0.660379	117.42		58.59		109.86	127.5	146.1		126.4	11.83	128.79
TRUE	High	Master Protein	Q96CX6	Leucine-rich repeat-containing protein 58 OS=Homo sapiens OX=9606 GN=LRRC58 PE=1 SV=2	0	FALSE	25.178	16	3	5	3	1	371	40.6	6.84	16.96	3			protein binding	Pf12799, Pf13855	116064	ENSG00000163428.3	LRRC58	3			0	2.562	0.01	1.213	100	3.109	0.000466187	3.59486e-16	0.908499	3.54689e-16	3.39058e-06	0		34.02		0	66.8	111.1		222.1		111.52
TRUE	High	Master Protein	Q7Z7A3	Cytoplasmic tRNA 2-thiolation protein 1 OS=Homo sapiens OX=9606 GN=CTU1 PE=1 SV=1	0	FALSE	8.87	11	2	2	2	1	348	36.4	9.2	2.61	2	metabolic process	cytoplasm;cytosol;mitochondrion	catalytic activity;protein binding;RNA binding	Pf01171	90353	ENSG00000142544.6	CTU1	19	Sulfur relay system		0	1.775	0.01	1.824	100	3.239	0.114715	3.59486e-16	0.516834	3.54689e-16	0.00245138	81.69		177.88		127.38	66.5	118.1		215.4	92.16	108.63
TRUE	High	Master Protein	Q6UW78	Ubiquinol-cytochrome-c reductase complex assembly factor 3 OS=Homo sapiens OX=9606 GN=UQCC3 PE=1 SV=2	0	FALSE	9.4	38	2	2	2	1	93	10.1	9.41	5.18	2	cell organization and biogenesis;metabolic process	membrane;mitochondrion		Pf15141	790955	ENSG00000204922.4	C11orf83; UQCC3	11			0	0.563	0.01	1.387	100	0.781	0.213235	3.59486e-16	0.864938	3.54689e-16	0.798974	0		0		0	170.7	96.1		133.2
TRUE	High	Master Protein	P51511	Matrix metalloproteinase-15 OS=Homo sapiens OX=9606 GN=MMP15 PE=1 SV=1	0	FALSE	7.608	4	2	2	2	1	669	75.8	7.46	1.92	2	cell differentiation;cell organization and biogenesis;metabolic process;regulation of biological process;response to stimulus	membrane	catalytic activity;enzyme regulator activity;metal ion binding;protein binding	Pf00045, Pf00413, Pf01471, Pf07998, Pf11857	4324	ENSG00000102996.4	MMP15	16		Matrix Metalloproteinases	0	0.331	0.01	1.396	100	0.462	7.89998e-05	3.59486e-16	0.799675	3.54689e-16	0.00831732	4.61		8.03		8.52	223	73.9		103.1	38.6
TRUE	High	Master Protein	Q7Z3B1	Neuronal growth regulator 1 OS=Homo sapiens OX=9606 GN=NEGR1 PE=1 SV=3	0	FALSE	8.139	12	2	2	2	1	354	38.7	6.21	2.72	2	metabolic process;regulation of biological process;response to stimulus	extracellular;membrane	protein binding	Pf00047, Pf07679, Pf13895, Pf13927	257194	ENSG00000172260.14	NEGR1	1	Cell adhesion molecules (CAMs)		0	1.115	0.01	0.88	100	0.977	0.842958	3.59486e-16	0.762811	3.54689e-16	0.961714	54.66		38.93		12.37	130.8	145.9		123.3	22.63	43.36
TRUE	High	Master Protein	Q99807	5-demethoxyubiquinone hydroxylase, mitochondrial OS=Homo sapiens OX=9606 GN=COQ7 PE=1 SV=3	0	FALSE	12.779	17	3	4	3	1	217	24.3	8.59	8.9	3	metabolic process;regulation of biological process	membrane;mitochondrion;nucleus	catalytic activity;metal ion binding;protein binding	Pf03232, Pf11867	10229	ENSG00000167186.10	COQ7	16	Ubiquinone and other terpenoid-quinone biosynthesis; Metabolic pathways		0	0.721	0.01	1.081	100	0.779	0.722482	3.59486e-16	0.999979	3.54689e-16	0.72056	29.19		44.56		25.38	233.1	80.2		86.7	113.69
TRUE	High	Master Protein	Q2KHR3	Glutamine and serine-rich protein 1 OS=Homo sapiens OX=9606 GN=QSER1 PE=1 SV=3	0	FALSE	8.688	1	2	2	2	1	1735	189.9	7.08	3.74	2				Pf13926	79832	ENSG00000060749.14	QSER1	11			0	38.357	0.01	0.065	100	2.495	4.49643e-16	3.59486e-16	4.24865e-16	3.54689e-16	0.0466429	13.51		0.15		32.22	9.6	366.6		23.8	12.83
TRUE	High	Master Protein	P15923	Transcription factor E2-alpha OS=Homo sapiens OX=9606 GN=TCF3 PE=1 SV=1	0	FALSE	11.686	8	2	2	2	1	654	67.6	6.47	5.46	2	cell differentiation;metabolic process;regulation of biological process	cytoplasm;nucleus	DNA binding;protein binding	Pf00010	6929	ENSG00000071564.14	TCF3	19	HTLV-I infection; Transcriptional misregulation in cancer; Signaling pathways regulating pluripotency of stem cells	Wnt Signaling Pathway Netpath; Wnt/beta-catenin Signaling Pathway in Leukemia; Sudden Infant Death Syndrome (SIDS) Susceptibility Pathways; Ectoderm Differentiation	0	0.991	0.01	0.881	100	0.873	0.988473	3.59486e-16	0.886164	3.54689e-16	0.935752	0		0		0	139.7	138.4		121.9
TRUE	High	Master Protein	A6NHL2	Tubulin alpha chain-like 3 OS=Homo sapiens OX=9606 GN=TUBAL3 PE=1 SV=2	0	FALSE	46.858	11	6	227	2	1	446	49.9	6.05	432.05	6	cell organization and biogenesis	cytoplasm;cytoskeleton	catalytic activity;nucleotide binding;structural molecule activity	Pf00091, Pf03953	79861	ENSG00000178462.11	TUBAL3	10	Pathogenic Escherichia coli infection; Gap junction; Phagosome; Apoptosis	Pathogenic Escherichia coli infection; Parkin-Ubiquitin Proteasomal System pathway	0	0.844	0.01	0.531	100	1.091	0.837602	3.59486e-16	0.0152914	3.54689e-16	0.981508	53.33		33.59		112.25	260.3	97.5		42.2	52.76	73.01
TRUE	Medium	Master Protein	P82914	28S ribosomal protein S15, mitochondrial OS=Homo sapiens OX=9606 GN=MRPS15 PE=1 SV=1	0.029	FALSE	2.312	9	2	5	2	1	257	29.8	10.48	6.04	2	cell organization and biogenesis;metabolic process	membrane;mitochondrion;nucleus;ribosome	RNA binding;structural molecule activity	Pf00312	64960	ENSG00000116898.11	MRPS15	1	Ribosome		0	0.308	0.01	0.726	100	0.501	1.81552e-05	3.59486e-16	0.622213	3.54689e-16	0.0271698	7.92		17.76		12.72	250.2	66.5		83.2	95.92	55.84
TRUE	High	Master Protein	Q5MNZ6	WD repeat domain phosphoinositide-interacting protein 3 OS=Homo sapiens OX=9606 GN=WDR45B PE=1 SV=2	0	FALSE	9.739	6	2	4	2	1	344	38.1	7.59	5.92	2	metabolic process	cytosol;membrane	protein binding		56270	ENSG00000141580.15	WDR45B; WDR45L	17			0	0.854	0.01	0.973	100	0.915	0.933093	3.59486e-16	0.955645	3.54689e-16	0.948374	21.7		36.32		56.04	150.2	76.2		173.6	50.17	37.66
TRUE	High	Master Protein	O43896	Kinesin-like protein KIF1C OS=Homo sapiens OX=9606 GN=KIF1C PE=1 SV=3	0	FALSE	24.535	5	5	10	2	1	1103	122.9	6.9	26.66	5	cellular component movement;transport	cytoplasm;cytoskeleton;endoplasmic reticulum;Golgi	catalytic activity;motor activity;nucleotide binding;protein binding;RNA binding	Pf00225, Pf00498	10749	ENSG00000129250.11	KIF1C	17			1	0.488	0.01	0.01		0.01	1.32855e-08	3.59486e-16	4.24865e-16		3.9087e-16	0					268.8	131.2
TRUE	High	Master Protein	A2VDF0	Fucose mutarotase OS=Homo sapiens OX=9606 GN=FUOM PE=1 SV=2	0	FALSE	12.463	26	2	2	2	1	154	16.8	5.58	6.72	2	metabolic process;regulation of biological process;response to stimulus	cytosol	catalytic activity	Pf05025	282969	ENSG00000148803.11	FUOM	10			0	3.559	0.01	0.01		0.01	5.22813e-07	3.59486e-16	4.24865e-16		3.9087e-16	255.04					87.7	312.3				122.26
TRUE	High	Master Protein	Q9BVA0	Katanin p80 WD40 repeat-containing subunit B1 OS=Homo sapiens OX=9606 GN=KATNB1 PE=1 SV=1	0	FALSE	8.83	4	2	2	2	1	655	72.3	7.56	2.99	2	cell division;regulation of biological process;transport	cytoplasm;cytoskeleton;cytosol;membrane;nucleus	catalytic activity;protein binding	Pf00400, Pf08662, Pf08801, Pf13925	10300	ENSG00000140854.12	KATNB1	16			0	1.159	0.01	0.781	100	0.905	0.840162	3.59486e-16	0.595392	3.54689e-16	0.948374	41		21.48		34.68	130.5	151.3		118.2	17.63	42.3
[truncated: 15 more columns]
